# Supplementary material for: Cross-Scale Variation in Biodiversity-Environment Links Illustrated by Coastal Sandflat Communities
Source: PubMed Central journal article supplement (PMC4640831; doi:10.1371/journal.pone.0142411), 2015-11-10
Supplement: pone.0142411.s001.pdf [file pone.0142411.s001.pdf]

| Harbour | tsilt      | tveryfine    | Fine       | Medium     | tcoarse    | tseagrass  | tshellhash   | tsand      | tloi       | tchla      |
|---------|------------|--------------|------------|------------|------------|------------|--------------|------------|------------|------------|
| k       |            | 0 0,17653297 | 64,0395584 | 32,8501053 | 0,01618341 |            | 0 0,22551341 | 1,34528292 | -0,1895767 | 3,19891662 |
| k       |            | 0 0,17653297 | 64,0395584 | 32,8501053 | 0,01618341 |            | 0 0,22551341 | 1,34528292 | -0,1895767 | 3,19891662 |
| k       |            | 0 0,17653297 | 64,0395584 | 32,8501053 | 0,01618341 |            | 0 0,22551341 | 1,34528292 | -0,1895767 | 3,19891662 |
| k       | 0,11212442 | 0,21257114   | 60,7035484 | 32,4485817 | 0,10720735 |            | 0 0,30469265 | 0,33806525 | -0,0477483 | 2,9070071  |
| k       |            | 0 0,18410472 | 63,9005623 | 32,7036552 | 0,02108473 |            | 0 0,33806525 | 1,23273107 | -0,1677338 | 2,82106663 |
| k       | 0,20977947 | 0,18633707   | 64,6457977 | 31,2189713 | 0,01406602 |            | 0 0,28675655 | 1,28403977 | -0,0548895 | 3,58288804 |
| k       |            | 0 0,17308733 | 62,8357201 | 34,123745  | 0,02728213 |            | 0 0,20135792 | 1,36943841 | -0,2002307 | 2,06381045 |
| k       |            | 0 0,3334136  | 66,4466553 | 22,8427448 |            | 0          | 0 0,20135792 | 1,36943841 | -0,2520273 | 1,58581355 |
| k       |            | 0 0,33563002 | 66,5189972 | 22,6329346 |            | 0          | 0 0          | 1,57079633 | -0,0369994 | 1,61221737 |
| k       |            | 0 0,32180173 | 66,4471893 | 23,5497379 |            | 0          | 0 0,10016742 | 1,47062891 | -0,2707847 | 1,45699468 |
| k       |            | 0 0,35680567 | 66,8711929 | 20,9164772 | 0,01117073 |            | 0 0          | 1,57079633 | -0,1634125 | 1,70948591 |
| k       |            | 0 0,34281827 | 67,0214386 | 40,2018776 | 0,05622909 |            | 0 0,10016742 | 1,47062891 | -0,1052736 | 1,78402601 |
| k       |            | 0 0,28741067 | 71,716713  | 20,2477627 |            | 0          | 0 0          | 1,57079633 | -0,3026064 | 1,95624037 |
| k       |            | 0 0,31997685 | 68,0016098 | 22,1045647 |            | 0          | 0 0          | 1,57079633 | -0,291242  | 1,94750498 |
| k       |            | 0 0,31879187 | 67,2174377 | 22,9473763 | 0,01095604 |            | 0 0          | 1,57079633 | -0,1401767 | 1,74752612 |
| k       |            | 0 0,3091183  | 66,0773697 | 24,6613712 | 0,0079694  |            | 0 0          | 1,57079633 | -0,2467871 | 1,71984204 |
| k       |            | 0 0,2176726  | 51,3456459 | 41,9704704 | 0,14261358 |            | 0 0          | 1,57079633 | -0,119049  | 1,37037627 |
| k       |            | 0 0,29858949 | 65,7015686 | 25,6357594 | 0,00944895 |            | 0 0,10016742 | 1,47062891 | -0,1611943 | 2,00117244 |
| k       |            | 0 0,31258092 | 66,6272278 | 23,9161911 |            | 0          | 0 0,20135792 | 1,36943841 | -0,1277702 | 1,51284338 |
| k       |            | 0 0,26682663 | 70,2146225 | 22,8260002 | 0,00842922 |            | 0 0          | 1,57079633 | -0,093481  | 1,69473594 |
| k       |            | 0 0,26682663 | 70,2146225 | 22,8260002 | 0,00842922 |            | 0 0          | 1,57079633 | -0,093481  | 1,69473594 |
| k       |            | 0 0,26682663 | 70,2146225 | 22,8260002 | 0,00842922 |            | 0 0          | 1,57079633 | -0,093481  | 1,69473594 |
| k       | 0,10392515 | 0,19878159   | 59,5802879 | 34,2067223 | 0,11145959 |            | 0 0,10016742 | 1,47062891 | -0,1765106 | 2,37584571 |
| k       | 0,21232261 | 0,14126895   | 62,2955284 | 31,2670708 | 0,01191498 |            | 0 0,22551341 | 1,34528292 | -0,017555  | 3,43318794 |
| k       | 0,30836539 | 0,2133696    | 55,9542351 | 30,2352028 | 0,03395605 | 1,39671332 | 0 0,17408301 | 0,18923343 | 3,7052556  |            |
| k       |            | 0 0,30120752 | 71,8814087 | 19,3170719 |            | 0          | 0 0,10016742 | 1,47062891 | -0,1300119 | 1,66849183 |
| k       |            | 0 0,34663359 | 68,5461121 | 19,9120007 |            | 0          | 0 0,20135792 | 1,36943841 | -0,0987455 | 2,23283888 |
| k       |            | 0 0,34663359 | 68,5461121 | 19,9120007 |            | 0          | 0 0,20135792 | 1,36943841 | -0,0987455 | 2,23283888 |

|   |            |            |            |            |            |            |            |            |            |            |
|---|------------|------------|------------|------------|------------|------------|------------|------------|------------|------------|
| k | 0          | 0,2772908  | 64,3073578 | 28,1826859 | 0,01264747 | 0          | 0          | 1,57079633 | -0,2151876 | 1,78984066 |
| k | 0,18824718 | 0,38409008 | 69,7228241 | 12,7339535 | 0          | 0          | 0          | 1,57079633 | -0,07157   | 1,52210768 |
| k | 0,18824718 | 0,38409008 | 69,7228241 | 12,7339535 | 0          | 0          | 0          | 1,57079633 | -0,07157   | 1,52210768 |
| k | 0,18824718 | 0,38409008 | 69,7228241 | 12,7339535 | 0          | 0          | 0          | 1,57079633 | -0,07157   | 1,52210768 |
| k | 0,14971358 | 0,36678862 | 66,4344559 | 18,4800301 | 0          | 0          | 0          | 1,57079633 | -0,0804361 | 1,99798834 |
| k | 0,1402392  | 0,29267187 | 62,4987946 | 26,0412483 | 0,10916147 | 0          | 0,17408301 | 1,39671332 | -0,0917615 | 1,26149689 |
| k | 0          | 0,28371136 | 64,7027359 | 27,4473152 | 0,01199862 | 0          | 0          | 1,57079633 | -0,2152002 | 1,97394428 |
| k | 0,17694003 | 0,28378224 | 62,046257  | 27,0020275 | 0,0133533  | 0          | 0          | 1,57079633 | -0,1576078 | 1,71506334 |
| k | 0,10907376 | 0,26098284 | 62,4502831 | 28,6791992 | 0,10154295 | 0,41151685 | 0,33806525 | 1,02439576 | -0,0575105 | 2,0537056  |
| k | 0          | 0,29102494 | 64,6020584 | 27,1490192 | 0,01256974 | 0,79539883 | 0,35374161 | 0,65388706 | -0,0698741 | 2,27684002 |
| k | 0          | 0,33378689 | 62,0528069 | 27,1944427 | 0,01380334 | 1,21705472 | 0,22551341 | 0,26776333 | -0,0273775 | 2,22727767 |
| k | 0          | 0,30835473 | 65,7012024 | 25,0791492 | 0,00945953 | 0          | 0,20135792 | 1,36943841 | -0,1591468 | 1,69968129 |
| k | 0          | 0,30835473 | 65,7012024 | 25,0791492 | 0,00945953 | 0          | 0,20135792 | 1,36943841 | -0,1591468 | 1,69968129 |
| k | 0          | 0,37507505 | 63,2504425 | 23,3206787 | 0,00906048 | 0,33806525 | 0          | 1,23273107 | -0,0752765 | 2,22109442 |
| k | 0          | 0,14430873 | 62,3565941 | 31,8976192 | 0,0156317  | 0          | 0,33806525 | 1,23273107 | -0,1039158 | 3,100095   |
| k | 0          | 0,19998754 | 60,5779724 | 35,319088  | 0,03956737 | 0          | 0,33806525 | 1,23273107 | -0,1106308 | 1,78444673 |
| k | 0,25279363 | 0,34595046 | 56,6715393 | 25,5478439 | 0,01638914 | 1,14580754 | 0          | 0,42498878 | 0,1269732  | 3,03564135 |
| k | 0,10178966 | 0,19266775 | 63,7536125 | 30,5775261 | 0,09879445 | 0,45102681 | 0,28675655 | 1,02439576 | -0,0029353 | 2,32619934 |
| k | 0,10907376 | 0,26098284 | 62,4502831 | 28,6791992 | 0,10154295 | 0,41151685 | 0,33806525 | 1,02439576 | -0,0575105 | 2,0537056  |
| k | 0,10907376 | 0,26098284 | 62,4502831 | 28,6791992 | 0,10154295 | 0,41151685 | 0,33806525 | 1,02439576 | -0,0575105 | 2,0537056  |
| k | 0          | 0,34663359 | 68,5461121 | 19,9120007 | 0          | 0          | 0,20135792 | 1,36943841 | -0,0987455 | 2,23283888 |
| k | 0,1780118  | 0,31374182 | 53,5204468 | 32,6880836 | 0,10656662 | 0          | 0,10016742 | 1,47062891 | -0,0701159 | 2,46051186 |
| k | 0          | 0,20600128 | 50,5128517 | 42,9826851 | 0,15292732 | 0          | 0,17408301 | 1,39671332 | -0,170341  | 1,51765573 |
| k | 0          | 0,30911925 | 60,4767952 | 30,112772  | 0,03943965 | 0          | 0,10016742 | 1,47062891 | -0,1929144 | 2,01084368 |
| k | 0          | 0,31632893 | 60,7587318 | 29,528347  | 0,0189384  | 0          | 0          | 1,57079633 | -0,1617371 | 0,63708778 |
| k | 0          | 0,2534769  | 63,1952477 | 30,459795  | 0,02373765 | 0          | 0          | 1,57079633 | -0,2331733 | 1,66132168 |
| k | 0          | 0,2534769  | 63,1952477 | 30,459795  | 0,02373765 | 0          | 0          | 1,57079633 | -0,2331733 | 1,66132168 |
| k | 0          | 0,2534769  | 63,1952477 | 30,459795  | 0,02373765 | 0          | 0          | 1,57079633 | -0,2331733 | 1,66132168 |
| k | 0,19239012 | 0,25947636 | 59,9532166 | 29,7193928 | 0,02973517 | 1,303033   | 0          | 0,26776333 | -0,1015854 | 1,97764196 |

|   |            |            |            |            |            |            |            |            |            |            |
|---|------------|------------|------------|------------|------------|------------|------------|------------|------------|------------|
| k | 0          | 0,22375758 | 52,3607178 | 40,8178825 | 0,13819492 | 0          | 0,17408301 | 1,39671332 | -0,248903  | 2,06001583 |
| k | 0          | 0,23484166 | 53,0571671 | 39,8120766 | 0,13138684 | 0          | 0,17408301 | 1,39671332 | -0,3252314 | 2,29115517 |
| k | 0          | 0,16769235 | 51,6332779 | 43,996048  | 0,12622635 | 0          | 0,10016742 | 1,47062891 | -0,1794482 | 2,39429765 |
| k | 0          | 0,23826671 | 52,9878807 | 43,7466621 | 0,12446875 | 0          | 0,26776333 | 1,303033   | -0,2297606 | 1,93657921 |
| k | 0          | 0,16604247 | 51,9803085 | 39,5034637 | 0,13967197 | 0          | 0,22551341 | 1,34528292 | -0,2760374 | 1,70091699 |
| k | 0          | 0,25483836 | 60,0598679 | 33,1492577 | 0,06607739 | 0          | 0          | 1,57079633 | -0,267507  | 1,83666023 |
| k | 0          | 0,23732453 | 60,1449051 | 34,0488091 | 0,05283945 | 0,39769942 | 0          | 1,17309691 | -0,1904518 | 1,31016078 |
| k | 0,20948583 | 0,33986364 | 62,4217529 | 22,1323719 | 0,00920611 | 0,20135792 | 0          | 1,36943841 | 0,15702564 | 2,25887181 |
| k | 0,19456172 | 0,3506616  | 63,4744949 | 20,9870548 | 0          | 0          | 0          | 1,57079633 | -0,1963204 | 2,27820133 |
| k | 0          | 0,2387179  | 69,3339996 | 25,0638084 | 0,01048733 | 0          | 0          | 1,57079633 | -0,1399806 | 2,33839558 |
| k | 0          | 0,26811184 | 62,480896  | 30,3757687 | 0,0354389  | 0          | 0,10016742 | 1,47062891 | -0,2092555 | 1,3553231  |
| k | 0          | 0,24823706 | 61,8075714 | 31,9823761 | 0,04165637 | 0          | 0,26776333 | 1,303033   | -0,2184198 | 2,27820133 |
| k | 0          | 0,27452173 | 63,1315346 | 29,412077  | 0,03280726 | 0          | 0,10016742 | 1,47062891 | -0,1874465 | 1,8517239  |
| k | 0          | 0,27452173 | 63,1315346 | 29,412077  | 0,03280726 | 0          | 0,10016742 | 1,47062891 | -0,1874465 | 1,8517239  |
| k | 0          | 0,27452173 | 63,1315346 | 29,412077  | 0,03280726 | 0          | 0,10016742 | 1,47062891 | -0,1874465 | 1,8517239  |
| k | 0          | 0,2676273  | 63,0900993 | 29,8171539 | 0,03157897 | 0          | 0          | 1,57079633 | -0,1999409 | 2,48219079 |
| k | 0          | 0,28473877 | 64,3290176 | 27,7372437 | 0,02070848 | 0          | 0          | 1,57079633 | -0,1250695 | 2,51537326 |
| k | 0          | 0,24588251 | 69,7155685 | 24,3510952 | 0,00915163 | 0          | 0          | 1,57079633 | -0,233245  | 2,99978875 |
| k | 0          | 0,21049849 | 73,261528  | 22,3725739 | 0          | 0          | 0          | 1,57079633 | -0,1262083 | 2,7745879  |
| k | 0          | 0,28279416 | 64,5500946 | 27,6483173 | 0,01235305 | 0          | 0          | 1,57079633 | -0,2092414 | 0,67270904 |
| k | 0          | 0,25716478 | 69,4072037 | 24,1135254 | 0,01020312 | 0          | 0          | 1,57079633 | -0,0969991 | 2,56620669 |
| k | 0          | 0,21338715 | 61,5084839 | 33,8956528 | 0,03334519 | 0          | 0          | 1,57079633 | 0,01963002 | 3,71170518 |
| k | 0,22289184 | 0,2193201  | 62,6086655 | 27,7496986 | 0,01476197 | 0          | 0          | 1,57079633 | 0,01524976 | 3,41829337 |
| k | 0,39602612 | 0,30956266 | 46,8599586 | 28,2444096 | 0,08579366 | 1,15927948 | 0,17408301 | 0,36886298 | 0,17921729 | 0,99199494 |
| k | 0          | 0,25483836 | 60,0598679 | 33,1492577 | 0,06607739 | 0          | 0          | 1,57079633 | -0,267507  | 1,83666023 |
| k | 0          | 0,25483836 | 60,0598679 | 33,1492577 | 0,06607739 | 0          | 0          | 1,57079633 | -0,267507  | 1,83666023 |
| k | 0          | 0,24078763 | 53,4648666 | 39,2252922 | 0,12775042 | 0          | 0,10016742 | 1,47062891 | -0,2197532 | 2,19942472 |
| k | 0          | 0,20618088 | 55,2821007 | 39,5019264 | 0,10140671 | 0          | 0,10016742 | 1,47062891 | -0,2511166 | 2,29066812 |
| k | 0,27363255 | 0,31572129 | 61,455883  | 21,6004982 | 0          | 0,65388706 | 0          | 0,91690926 | 0,0206909  | 3,06200062 |

|   |            |            |            |            |            |            |            |            |            |            |
|---|------------|------------|------------|------------|------------|------------|------------|------------|------------|------------|
| k | 0,13689552 | 0,35758155 | 65,0949554 | 20,791996  | 0          | 0,10016742 | 0          | 1,47062891 | 0,0407658  | 2,40203091 |
| k | 0          | 0,29650616 | 65,7659378 | 25,6907063 | 0,00800321 | 0,67449093 | 0          | 0,8963054  | -0,1580564 | 1,92269675 |
| k | 0,23572164 | 0,31379206 | 62,2672653 | 22,750845  | 0          | 0,67449093 | 0          | 0,8963054  | -0,0100025 | 2,13016007 |
| k | 0,19497864 | 0,25543386 | 65,7921371 | 24,0701561 | 0          | 0,26776333 | 0          | 1,303033   | 0,04787125 | 2,11088802 |
| k | 0,39602612 | 0,30956266 | 46,8599586 | 28,2444096 | 0,08579366 | 1,15927948 | 0,17408301 | 0,36886298 | 0,17921729 | 0,99199494 |
| k | 0,39602612 | 0,30956266 | 46,8599586 | 28,2444096 | 0,08579366 | 1,15927948 | 0,17408301 | 0,36886298 | 0,17921729 | 0,99199494 |
| k | 0          | 0,25084565 | 56,5638084 | 36,2958374 | 0,09910049 | 0,60126422 | 0,10016742 | 0,95885661 | -0,0368636 | 4,20412255 |
| k | 0,30575552 | 0,29756099 | 54,3363991 | 27,6420135 | 0,06042451 | 1,21705472 | 0,10016742 | 0,33806525 | 0,22573559 | 1,37749515 |
| k | 0          | 0,25692842 | 54,5052376 | 37,7290382 | 0,11463997 | 0          | 0,20135792 | 1,36943841 | -0,3394319 | 1,90335927 |
| k | 0          | 0,25475989 | 61,7214355 | 31,7851353 | 0,03774104 | 1,0131975  | 0          | 0,55759883 | -0,1449029 | 1,86190758 |
| k | 0          | 0,22160465 | 57,0957184 | 37,3136864 | 0,08726558 | 0          | 0,33806525 | 1,23273107 | -0,2120368 | 1,79012903 |
| k | 0          | 0,20732684 | 55,6729393 | 39,1833801 | 0,09535336 | 0          | 0,10016742 | 1,47062891 | -0,2470635 | 1,89435984 |
| k | 0          | 0,22093964 | 57,6389885 | 36,9354782 | 0,07901342 | 0          | 0          | 1,57079633 | -0,2577247 | 1,64512316 |
| k | 0          | 0,19229683 | 65,4746017 | 30,8635769 | 0,00967899 | 0          | 0          | 1,57079633 | -0,1108806 | 3,41211608 |
| k | 0,08561995 | 0,24751481 | 62,2734375 | 29,9266453 | 0,10344927 | 0,64350111 | 0,35374161 | 0,8054035  | -0,0657042 | 3,48532516 |
| k | 0          | 0,20201248 | 60,5907249 | 35,2186508 | 0,04062299 | 0          | 0          | 1,57079633 | -0,1363241 | 3,5759676  |
| k | 0,190879   | 0,29355443 | 62,3258972 | 25,6936836 | 0,01065572 | 0,87589139 | 0,17408301 | 0,66421524 | -0,1191864 | 2,74172918 |
| k | 0,09240588 | 0,31866546 | 64,0578308 | 23,1929512 | 0,14482048 | 0          | 0,10016742 | 1,47062891 | -0,0578305 | 1,92007393 |
| k | 0,18468913 | 0,28845198 | 62,3797836 | 26,1458092 | 0,01159681 | 1,20193334 | 0,22551341 | 0,28675655 | 0,01182588 | 1,62842097 |
| k | 0,08717875 | 0,28205258 | 63,4855461 | 27,9917355 | 0,01341644 | 0,8963054  | 0,28675655 | 0,59050002 | 0,05215372 | 1,1743897  |
| k | 0          | 0,28837428 | 65,0087967 | 26,8915138 | 0,0108127  | 0          | 0,17408301 | 1,39671332 | -0,1090299 | 1,9351672  |
| k | 0          | 0,30835473 | 65,7012024 | 25,0791492 | 0,00945953 | 0          | 0,20135792 | 1,36943841 | -0,1591468 | 1,69968129 |
| k | 0,19497864 | 0,25543386 | 65,7921371 | 24,0701561 | 0          | 0,26776333 | 0          | 1,303033   | 0,04787125 | 2,11088802 |
| k | 0,19497864 | 0,25543386 | 65,7921371 | 24,0701561 | 0          | 0,26776333 | 0          | 1,303033   | 0,04787125 | 2,11088802 |
| k | 0,2445072  | 0,32823088 | 61,2203331 | 22,5188713 | 0,00918816 | 0,17408301 | 0          | 1,39671332 | 0,13039498 | 2,89100306 |
| k | 0          | 0,23416775 | 59,8589745 | 34,3890305 | 0,06070366 | 0,28675655 | 0          | 1,28403977 | -0,1253703 | 1,72770474 |
| k | 0          | 0,23416775 | 59,8589745 | 34,3890305 | 0,06070366 | 0,28675655 | 0          | 1,28403977 | -0,1253703 | 1,72770474 |
| k | 0          | 0,23416775 | 59,8589745 | 34,3890305 | 0,06070366 | 0,28675655 | 0          | 1,28403977 | -0,1253703 | 1,72770474 |
| k | 0          | 0,27579125 | 56,9363785 | 35,0120163 | 0,0798608  | 0,63305184 | 0,17408301 | 0,90658109 | -0,0919031 | 1,71359033 |

|   |            |            |            |            |            |            |            |            |            |            |            |
|---|------------|------------|------------|------------|------------|------------|------------|------------|------------|------------|------------|
| k |            | 0          | 0,24416499 | 54,7255707 | 38,3497925 | 0,10413588 | 0,63305184 | 0,10016742 | 0,92729522 | -0,2698155 | 1,52369234 |
| k | 0,14627331 | 0,27286923 | 62,4338531 | 28,0803165 | 0,03141711 | 0,64350111 | 0,51197269 | 0,6847192  | -0,1821943 | 1,36257238 |            |
| k |            | 0          | 0,1809795  | 63,6622543 | 33,0549011 | 0,02075938 | 0          | 0          | 1,57079633 | -0,1258723 | 2,25494678 |
| k |            | 0          | 0,22141088 | 52,0194969 | 35,7862129 | 0,06286137 | 0,52359878 | 0,39769942 | 0,88607712 | -0,1103187 | 2,44110496 |
| k |            | 0          | 0,22349052 | 67,9851761 | 27,1026325 | 0          | 0,26776333 | 0,20135792 | 1,23273107 | -0,2269788 | 2,52549551 |
| k | 0,10060213 | 0,20977709 | 59,4826813 | 40,0467415 | 0,14550963 | 0          | 0,30469265 | 0,33806525 | -0,1261964 | 2,02039642 |            |
| k | 0,09589968 | 0,27923837 | 58,1097488 | 31,8981705 | 0,12189046 | 0          | 0,26776333 | 1,17309691 | -0,2142939 | 3,51108865 |            |
| k | 0,09589968 | 0,27923837 | 58,1097488 | 31,8981705 | 0,12189046 | 0          | 0,26776333 | 1,17309691 | -0,2142939 | 3,51108865 |            |
| k | 0,09589968 | 0,27923837 | 58,1097488 | 31,8981705 | 0,12189046 | 0          | 0,26776333 | 1,17309691 | -0,2142939 | 3,51108865 |            |
| k |            | 0          | 0,22353542 | 61,6141243 | 33,356411  | 0,03396739 | 0          | 0,26776333 | 1,303033   | -0,1998184 | 2,14295398 |
| k |            | 0          | 0,21760105 | 61,589138  | 33,6306076 | 0,03457523 | 0,10016742 | 0,28675655 | 1,26610367 | -0,2871083 | 1,87553563 |
| k | 0,19791479 | 0,28589791 | 60,4050674 | 27,6872387 | 0,02968095 | 1,21705472 | 0          | 0,35374161 | 0,07512634 | 1,78128145 |            |
| k | 0,24805853 | 0,33470244 | 55,8173447 | 27,124012  | 0,04901677 | 1,57079633 | 0          | 0          | 0,00553963 | 1,61992094 |            |
| k | 0,26418744 | 0,33195249 | 55,8035278 | 26,6362095 | 0,03482643 | 1,47062891 | 0          | 0,10016742 | 0,19435607 | 2,55209592 |            |
| k | 0,09461475 | 0,23747562 | 60,7759323 | 31,7046185 | 0,10484776 | 1,57079633 | 0          | 0          | -0,1085035 | 2,25663426 |            |
| k | 0,2242854  | 0,34479336 | 57,1777802 | 26,4202156 | 0,01756422 | 1,21705472 | 0          | 0,35374161 | -0,009262  | 1,80645566 |            |
| k | 0,20377495 | 0,29357058 | 60,3617401 | 27,0969677 | 0,02691366 | 1,47062891 | 0          | 0,10016742 | 0,00624058 | 2,26642758 |            |
| k | 0,20715331 | 0,30426471 | 61,2358627 | 25,4803028 | 0,0279493  | 1,39671332 | 0,17408301 | 0          | 0,02217911 | 1,74971462 |            |
| k | 0,20715331 | 0,30426471 | 61,2358627 | 25,4803028 | 0,0279493  | 1,39671332 | 0,17408301 | 0          | 0,02217911 | 1,74971462 |            |
| k | 0,20715331 | 0,30426471 | 61,2358627 | 25,4803028 | 0,0279493  | 1,39671332 | 0,17408301 | 0          | 0,02217911 | 1,74971462 |            |
| k | 0,2223106  | 0,24924964 | 64,6125717 | 24,4328995 | 0,00909133 | 0,26776333 | 0          | 1,303033   | -0,1184799 | 2,30305252 |            |
| k |            | 0          | 0,22195492 | 60,8020477 | 34,1195679 | 0,0482218  | 0,17408301 | 0          | 1,39671332 | -0,2201081 | 2,3676286  |
| k | 0,24805876 | 0,21938484 | 56,111084  | 32,7101593 | 0,06441612 | 0,8963054  | 0,17408301 | 0,64350111 | 0,15770285 | 2,65614256 |            |
| k | 0,09873432 | 0,24302344 | 60,5809555 | 32,0222054 | 0,07976586 | 1,15927948 | 0,10016742 | 0,39769942 | -0,0800421 | 2,31465482 |            |
| k | 0,25859779 | 0,20619768 | 61,4580078 | 27,7934742 | 0,01309503 | 0          | 0,30469265 | 1,26610367 | -0,0426058 | 2,3966148  |            |
| k | 0,20969456 | 0,22998498 | 56,6275063 | 33,3428955 | 0,07075471 | 0,5686755  | 0,30469265 | 0,90658109 | 0,08142533 | 1,74766937 |            |
| k | 0,21107047 | 0,24062015 | 58,510746  | 31,1931648 | 0,04775251 | 1,34528292 | 0,14189705 | 0,17408301 | 0,05824526 | 2,18088534 |            |
| k | 0,23957151 | 0,21091162 | 53,687851  | 35,4389191 | 0,09286676 | 0,81541619 | 0,17408301 | 0,72525322 | 0,1132973  | 2,5878628  |            |
| k | 0,23957151 | 0,21091162 | 53,687851  | 35,4389191 | 0,09286676 | 0,81541619 | 0,17408301 | 0,72525322 | 0,1132973  | 2,5878628  |            |

|   |            |            |            |            |            |            |            |            |            |            |
|---|------------|------------|------------|------------|------------|------------|------------|------------|------------|------------|
| k | 0,23957151 | 0,21091162 | 53,687851  | 35,4389191 | 0,09286676 | 0,81541619 | 0,17408301 | 0,72525322 | 0,1132973  | 2,5878628  |
| k | 0,22426379 | 0,24554887 | 57,8308868 | 30,9837036 | 0,05752285 | 0,36886298 | 0,30469265 | 1,08259106 | -0,1398248 | 2,51807024 |
| k | 0,26956993 | 0,18636871 | 58,4844933 | 30,8845711 | 0,03243438 | 0          | 0,17408301 | 1,39671332 | 0,0275933  | 3,4317818  |
| k | 0,21030776 | 0,2050239  | 62,7416992 | 28,7284451 | 0,0163809  | 0          | 0,33806525 | 1,23273107 | -0,1490266 | 3,08813476 |
| k | 0,19129374 | 0,20130916 | 63,5283813 | 28,8336563 | 0,01580002 | 0          | 0,20135792 | 1,36943841 | -0,1204543 | 2,40545988 |
| k | 0          | 0,17288081 | 62,7474022 | 34,2161827 | 0,0278052  | 0          | 0,17408301 | 1,39671332 | -0,0797925 | 3,46202535 |
| k | 0          | 0,22321054 | 61,9347954 | 33,0076447 | 0,0396919  | 0          | 0,26776333 | 1,303033   | -0,2505608 | 2,54989697 |
| k | 0,09607803 | 0,22228039 | 60,7030182 | 32,1105194 | 0,11886206 | 0          | 0,28675655 | 1,28403977 | -0,2147541 | 2,96420454 |
| k | 0          | 0,20885754 | 60,8914337 | 34,6317978 | 0,04216472 | 0          | 0,17408301 | 1,39671332 | -0,1966207 | 2,39056526 |
| k | 0          | 0,20885754 | 60,8914337 | 34,6317978 | 0,04216472 | 0          | 0,17408301 | 1,39671332 | -0,1966207 | 2,39056526 |
| k | 0          | 0,20885754 | 60,8914337 | 34,6317978 | 0,04216472 | 0          | 0,17408301 | 1,39671332 | -0,1966207 | 2,39056526 |
| k | 0          | 0,17732743 | 63,6148605 | 33,2230492 | 0,0224545  | 0          | 0,35374161 | 1,21705472 | -0,0921551 | 2,72223247 |
| k | 0,21272208 | 0,14676071 | 62,6996155 | 30,6893082 | 0,01240919 | 0,14189705 | 0,20135792 | 1,32332926 | -0,1554575 | 2,92447306 |
| k | 0,20853653 | 0,14879575 | 63,0826874 | 30,4169827 | 0,01285687 | 0          | 0,30469265 | 1,26610367 | -0,0534828 | 3,91154024 |
| k | 0,28084316 | 0,18101816 | 58,3948517 | 30,6299324 | 0,02280614 | 1,28403977 | 0,20135792 | 0,20135792 | 0,0245682  | 1,06816487 |
| k | 0,25951527 | 0,21786431 | 62,4549599 | 26,281683  | 0,00807412 | 0,88607712 | 0,10016742 | 0,67449093 | 0,07703876 | 2,1651614  |
| k | 0,25951527 | 0,21786431 | 62,4549599 | 26,281683  | 0,00807412 | 0,88607712 | 0,10016742 | 0,67449093 | 0,07703876 | 2,1651614  |
| k | 0,25951527 | 0,21786431 | 62,4549599 | 26,281683  | 0,00807412 | 0,88607712 | 0,10016742 | 0,67449093 | 0,07703876 | 2,1651614  |
| k | 0,1948189  | 0,20749241 | 62,9069786 | 29,0819092 | 0,0139901  | 0,69490494 | 0,33806525 | 0,76539283 | -0,0048699 | 1,00392751 |
| k | 0,22622291 | 0,19290698 | 61,2775497 | 29,9810715 | 0,01871659 | 0,96953211 | 0,20135792 | 0,55759883 | -0,0586236 | 2,8690178  |
| k | 0,3442586  | 0,25785804 | 56,971035  | 25,0874043 | 0,02191111 | 1,04719755 | 0,26776333 | 0,43814903 | 0,22662843 | 1,34277606 |
| k | 0,19701483 | 0,32420163 | 63,3726616 | 22,6482716 | 0          | 0,51197269 | 0,10016742 | 1,04719755 | -0,1406047 | 2,90189979 |
| k | 0,27332641 | 0,21238503 | 61,6385307 | 26,6237507 | 0,00886352 | 1,57079633 | 0          | 0          | 0,19569171 | 2,50011301 |
| k | 0,26598892 | 0,18992981 | 60,1375465 | 29,3713894 | 0,0131061  | 1,05882364 | 0,30469265 | 0,39769942 | 0,18419514 | 3,73789397 |
| k | 0          | 0,19842522 | 60,2634048 | 35,6520805 | 0,04458629 | 0          | 0          | 1,57079633 | -0,1735952 | 2,29041695 |
| k | 0          | 0,20079512 | 60,6785393 | 35,1986694 | 0,03806455 | 0          | 0,10016742 | 1,47062891 | -0,0877582 | 2,22384842 |
| k | 0          | 0,20836232 | 61,0657845 | 34,5248146 | 0,0361163  | 0          | 0          | 1,57079633 | -0,205012  | 1,84522279 |
| k | 0          | 0,21000081 | 60,2624512 | 35,1538162 | 0,0488197  | 0          | 0          | 1,57079633 | -0,1548949 | 3,02315755 |
| k | 0          | 0,15927631 | 62,1859665 | 35,2320938 | 0,02577571 | 0          | 0,10016742 | 1,47062891 | -0,0675881 | 3,69225871 |

|   |            |            |            |            |            |            |            |            |            |            |
|---|------------|------------|------------|------------|------------|------------|------------|------------|------------|------------|
| k | 0          | 0,17632792 | 64,1985779 | 32,6985207 | 0,01607396 | 0          | 0          | 1,57079633 | -0,0535204 | 3,93485086 |
| k | 0          | 0,16617836 | 62,3120003 | 34,8714142 | 0,02835587 | 0          | 0          | 1,57079633 | -0,1271458 | 3,07742642 |
| k | 0          | 0,16617836 | 62,3120003 | 34,8714142 | 0,02835587 | 0          | 0          | 1,57079633 | -0,1271458 | 3,07742642 |
| k | 0          | 0,16617836 | 62,3120003 | 34,8714142 | 0,02835587 | 0          | 0          | 1,57079633 | -0,1271458 | 3,07742642 |
| k | 0          | 0,16502873 | 62,1128693 | 35,1157112 | 0,02694895 | 0          | 0          | 1,57079633 | -0,1473272 | 2,72578738 |
| k | 0          | 0,19813168 | 59,2876205 | 36,5071754 | 0,05753713 | 0          | 0,10016742 | 1,47062891 | -0,2776941 | 2,45092568 |
| k | 0          | 0,16868983 | 61,7537956 | 35,3025169 | 0,03535592 | 0          | 0          | 1,57079633 | -0,1093637 | 3,1226401  |
| k | 0          | 0,16180536 | 60,9496384 | 36,2760086 | 0,0423241  | 0          | 0          | 1,57079633 | -0,2750081 | 1,30286838 |
| k | 0          | 0,20705179 | 58,6029205 | 36,6358833 | 0,07321339 | 0,32175055 | 0,22551341 | 1,17309691 | -0,2415571 | 2,15638954 |
| k | 0          | 0,16405406 | 60,9492683 | 36,2078171 | 0,04191681 | 0          | 0,10016742 | 1,47062891 | -0,2053287 | 2,60304104 |
| k | 0          | 0,18527008 | 63,2952309 | 33,2008553 | 0,03324902 | 0          | 0,17408301 | 1,39671332 | -0,1636086 | 2,56469893 |
| k | 0          | 0,23447331 | 62,3776398 | 32,1080742 | 0,03414298 | 0,10016742 | 0,17408301 | 1,36943841 | -0,2547642 | 1,2431691  |
| k | 0          | 0,23447331 | 62,3776398 | 32,1080742 | 0,03414298 | 0,10016742 | 0,14189705 | 1,39671332 | -0,2547642 | 1,2431691  |
| k | 0          | 0,23447331 | 62,3776398 | 32,1080742 | 0,03414298 | 0,10016742 | 0,14189705 | 1,39671332 | -0,2547642 | 1,2431691  |
| k | 0          | 0,17491831 | 61,8364372 | 34,9536896 | 0,04259315 | 0,10016742 | 0,17408301 | 1,36943841 | -0,2392995 | 2,08072001 |
| k | 0          | 0,20462805 | 57,8239746 | 37,3460732 | 0,08381236 | 0,30469265 | 0,17408301 | 1,21705472 | -0,2393703 | 2,38445908 |
| k | 0          | 0,21529885 | 59,8541756 | 35,2065277 | 0,06128548 | 0,36886298 | 0,22551341 | 1,1326473  | -0,20412   | 1,85687312 |
| k | 0          | 0,19185253 | 55,9844666 | 39,3805504 | 0,10012636 | 0,383497   | 0,24746706 | 1,10714872 | -0,3525475 | 1,90929195 |
| k | 0,10438877 | 0,23332539 | 61,1910019 | 31,1885796 | 0,10924362 | 0,30469265 | 0          | 1,26610367 | 0,09284417 | 2,52970114 |
| k | 0          | 0,19943545 | 57,0714989 | 38,2255402 | 0,08831715 | 0,39769942 | 0,20135792 | 1,11976951 | -0,1261262 | 2,0925654  |
| k | 0          | 0,18759286 | 56,6909828 | 39,1523399 | 0,08247417 | 0,39769942 | 0,10016742 | 0,41151685 | -0,1880296 | 2,49837861 |
| k | 0,24501009 | 0,18333254 | 53,1323547 | 37,0035934 | 0,08129333 | 0,39769942 | 0,14189705 | 1,14580754 | -0,1280601 | 3,02680391 |
| k | 0,24501009 | 0,18333254 | 53,1323547 | 37,0035934 | 0,08129333 | 0,383497   | 0,14189705 | 1,15927948 | -0,1280601 | 3,02680391 |
| k | 0,24501009 | 0,18333254 | 53,1323547 | 37,0035934 | 0,08129333 | 0,33806525 | 0,14189705 | 1,20193334 | -0,1280601 | 3,02680391 |
| k | 0          | 0,22425309 | 54,3794479 | 39,3498917 | 0,11538426 | 0,35374161 | 0,10016742 | 1,20193334 | 0,00576101 | 3,46804362 |
| k | 0,18582422 | 0,16513617 | 43,8038216 | 45,4301949 | 0,21735022 | 0,28675655 | 0,14189705 | 1,24904577 | -0,0998964 | 2,22809492 |
| k | 0,20319242 | 0,17381204 | 58,9637222 | 33,8152237 | 0,04048908 | 0,26776333 | 0,14189705 | 1,26610367 | -0,1294515 | 2,56862188 |
| k | 0          | 0,1821247  | 55,7650871 | 40,1901741 | 0,08753669 | 0          | 0          | 1,57079633 | -0,0891908 | 2,60365866 |
| k | 0          | 0,18844745 | 57,3074722 | 38,6101265 | 0,07576878 | 0,22551341 | 0,17408301 | 1,28403977 | -0,1718839 | 1,70807488 |

|   |   |            |            |            |            |            |            |            |            |            |
|---|---|------------|------------|------------|------------|------------|------------|------------|------------|------------|
| k | 0 | 0,16381573 | 53,7309151 | 42,5790291 | 0,10168465 | 0          | 0,10016742 | 1,47062891 | -0,2140866 | 3,17267151 |
| k | 0 | 0,18626661 | 52,2955208 | 42,9062386 | 0,11725818 | 0          | 0,10016742 | 1,47062891 | -0,0939905 | 2,21017993 |
| k | 0 | 0,17106261 | 54,3721542 | 41,8050461 | 0,09632514 | 0          | 0,10016742 | 1,47062891 | -0,2019985 | 2,01464844 |
| k | 0 | 0,14985935 | 51,557991  | 44,7240105 | 0,12232843 | 0          | 0          | 1,57079633 | -0,1824822 | 2,77212502 |
| k | 0 | 0,14985935 | 51,557991  | 44,7240105 | 0,12232843 | 0          | 0          | 1,57079633 | -0,1824822 | 2,77212502 |
| k | 0 | 0,14985935 | 51,557991  | 44,7240105 | 0,12232843 | 0          | 0          | 1,57079633 | -0,1824822 | 2,77212502 |
| k | 0 | 0,18674041 | 56,9214134 | 39,0349426 | 0,07732968 | 0          | 0          | 1,57079633 | -0,2301004 | 1,94633531 |
| k | 0 | 0,20077938 | 58,5503578 | 37,0548668 | 0,06465308 | 0          | 0,10016742 | 1,47062891 | -0,2743888 | 2,54178443 |
| k | 0 | 0,17292318 | 55,7697105 | 40,4891739 | 0,08846459 | 0,35374161 | 0,10016742 | 1,20193334 | -0,1363033 | 2,13400638 |
| k | 0 | 0,16808103 | 55,8952675 | 40,5715981 | 0,08580918 | 0          | 0          | 1,57079633 | -0,0531318 | 2,66928671 |
| k | 0 | 0,23569171 | 56,5896835 | 37,2418785 | 0,08468742 | 0          | 0          | 1,57079633 | -0,033701  | 1,88071112 |
| k | 0 | 0,19631302 | 57,5717239 | 38,0135994 | 0,07818527 | 0          | 0,17408301 | 1,39671332 | -0,1840643 | 2,90025417 |
| k | 0 | 0,16313129 | 53,4910965 | 42,6261253 | 0,11181772 | 0          | 0          | 1,57079633 | -0,1077679 | 2,01786928 |
| k | 0 | 0,17380235 | 56,1436539 | 40,1741829 | 0,08326661 | 0          | 0,10016742 | 1,47062891 | -0,0671038 | 2,99119324 |
| k | 0 | 0,17380235 | 56,1436539 | 40,1741829 | 0,08326661 | 0          | 0,10016742 | 1,47062891 | -0,0671038 | 2,99119324 |
| k | 0 | 0,17380235 | 56,1436539 | 40,1741829 | 0,08326661 | 0          | 0,10016742 | 1,47062891 | -0,0671038 | 2,99119324 |
| k | 0 | 0,1794385  | 56,8512154 | 39,3109589 | 0,08086061 | 0          | 0          | 1,57079633 | -0,1668032 | 3,88511052 |
| k | 0 | 0,17487329 | 56,549942  | 39,7391205 | 0,08279383 | 0          | 0          | 1,57079633 | -0,0859443 | 1,75871064 |
| k | 0 | 0,15813597 | 54,2134972 | 42,3368721 | 0,0986337  | 0          | 0          | 1,57079633 | -0,0938397 | 2,78186894 |
| k | 0 | 0,23145504 | 60,7984161 | 33,6713257 | 0,05180115 | 0          | 0,10016742 | 1,47062891 | -0,3740815 | 1,97764196 |
| k | 0 | 0,17906098 | 57,1214294 | 39,1105728 | 0,07726753 | 0          | 0,10016742 | 1,47062891 | -0,1277838 | 3,5479322  |
| k | 0 | 0,16947916 | 54,8909454 | 41,3253479 | 0,09704326 | 0          | 0          | 1,57079633 | -0,1043522 | 3,43907171 |
| k | 0 | 0,17190298 | 54,6578293 | 41,3162308 | 0,10506794 | 0          | 0          | 1,57079633 | 0,01793759 | 2,60573676 |
| k | 0 | 0,1663161  | 54,6138649 | 41,6415062 | 0,10036482 | 0          | 0          | 1,57079633 | -0,0307182 | 1,78402601 |
| k | 0 | 0,1663161  | 54,6138649 | 41,6415062 | 0,10036482 | 0          | 0          | 1,57079633 | -0,0307182 | 1,78402601 |
| k | 0 | 0,1663161  | 54,6138649 | 41,6415062 | 0,10036482 | 0          | 0          | 1,57079633 | -0,0307182 | 1,78402601 |
| k | 0 | 0,20151947 | 58,8670692 | 36,6888237 | 0,06621279 | 0          | 0,17408301 | 1,39671332 | -0,0798034 | 2,5249904  |
| k | 0 | 0,2142985  | 60,4251366 | 34,8297081 | 0,04720227 | 0,20135792 | 0,28675655 | 1,21705472 | -0,2153165 | 2,80490757 |
| k | 0 | 0,16495859 | 60,9426422 | 36,1758118 | 0,04302548 | 0          | 0          | 1,57079633 | -0,1971223 | 3,34484475 |



|   |            |            |            |            |            |            |            |            |            |            |
|---|------------|------------|------------|------------|------------|------------|------------|------------|------------|------------|
| k | 0          | 0,17587887 | 63,1789131 | 33,6761818 | 0,02887077 | 0          | 0          | 1,57079633 | -0,1205217 | 2,85727202 |
| k | 0          | 0,20202203 | 59,0613098 | 36,5171356 | 0,0629292  | 0,17408301 | 0          | 1,39671332 | -0,305434  | 1,13394466 |
| k | 0          | 0,18768625 | 58,4031372 | 37,7160034 | 0,06324143 | 0,10016742 | 0,20135792 | 1,34528292 | -0,178103  | 2,16365934 |
| k | 0          | 0,16471586 | 62,119873  | 35,0795631 | 0,03345486 | 0          | 0,10016742 | 1,47062891 | -0,1242661 | 2,35917157 |
| k | 0          | 0,17364684 | 61,9159622 | 34,9401169 | 0,03985814 | 0          | 0,30469265 | 1,26610367 | -0,2189854 | 2,82625809 |
| k | 0          | 0,17364684 | 61,9159622 | 34,9401169 | 0,03985814 | 0          | 0,30469265 | 1,26610367 | -0,2189854 | 2,82625809 |
| k | 0          | 0,17364684 | 61,9159622 | 34,9401169 | 0,03985814 | 0          | 0,30469265 | 1,26610367 | -0,2189854 | 2,82625809 |
| k | 0          | 0,16394185 | 60,912117  | 36,2302895 | 0,04404752 | 0          | 0,10016742 | 1,47062891 | -0,1765232 | 1,71506334 |
| k | 0          | 0,1890379  | 64,2656708 | 32,1541328 | 0,02214295 | 0,17408301 | 0          | 1,39671332 | -0,2751774 | 2,23540094 |
| k | 0          | 0,16407932 | 61,1622391 | 35,9877243 | 0,04266362 | 0          | 0          | 1,57079633 | -0,186851  | 2,20592424 |
| k | 0          | 0,22512235 | 62,1318169 | 32,7851028 | 0,03164545 | 0          | 0          | 1,57079633 | -0,1042058 | 1,78402601 |
| k | 0          | 0,21765379 | 60,9194221 | 34,1758957 | 0,04918323 | 0          | 0,17408301 | 1,39671332 | -0,2511619 | 1,17856459 |
| k | 0          | 0,18442568 | 63,2976036 | 33,2271233 | 0,03352866 | 0          | 0,10016742 | 1,47062891 | -0,1312102 | 1,1861929  |
| k | 0          | 0,17279115 | 62,1598282 | 34,7329979 | 0,03888048 | 0,30469265 | 0,10016742 | 1,24904577 | -0,1988488 | 1,87164738 |
| k | 0          | 0,18206783 | 63,1598969 | 33,4548225 | 0,03269864 | 0          | 0,20135792 | 1,36943841 | -0,2039111 | 0,85865483 |
| k | 0          | 0,18206783 | 63,1598969 | 33,4548225 | 0,03269864 | 0          | 0,20135792 | 1,36943841 | -0,2039111 | 0,85865483 |
| k | 0          | 0,18206783 | 63,1598969 | 33,4548225 | 0,03269864 | 0          | 0,20135792 | 1,36943841 | -0,2039111 | 0,85865483 |
| k | 0          | 0,18962644 | 63,9090881 | 32,4673271 | 0,02658489 | 0          | 0,20135792 | 1,36943841 | -0,2376798 | 1,64495359 |
| k | 0          | 0,18426688 | 63,7397308 | 32,8270645 | 0,02757812 | 0,28675655 | 0          | 1,28403977 | -0,1116613 | 2,37238579 |
| k | 0          | 0,21704477 | 61,626091  | 33,6083984 | 0,03580947 | 0,22551341 | 0          | 1,34528292 | -0,2046257 | 1,77166922 |
| k | 0,25295379 | 0,21214822 | 54,9141464 | 33,9280891 | 0,06794527 | 0,88607712 | 0          | 0,6847192  | -0,1888986 | 2,11728896 |
| k | 0          | 0,19115655 | 64,4026489 | 31,9406891 | 0,0216514  | 0,30469265 | 0          | 1,26610367 | -0,0951014 | 1,99460171 |
| k | 0          | 0,19034492 | 64,1976089 | 32,1626968 | 0,02452265 | 0,10016742 | 0          | 1,47062891 | -0,1822898 | 1,94315503 |
| k | 0          | 0,20611488 | 66,1470261 | 29,6547356 | 0,0098617  | 0,47603382 | 0          | 1,09476251 | -0,1056829 | 1,25275932 |
| k | 0          | 0,22999898 | 61,3826904 | 33,2392654 | 0,04252281 | 0,33806525 | 0          | 1,23273107 | -0,0567671 | 2,14123616 |
| k | 0          | 0,22999898 | 61,3826904 | 33,2392654 | 0,04252281 | 0,33806525 | 0          | 1,23273107 | -0,0567671 | 2,14123616 |
| k | 0          | 0,22999898 | 61,3826904 | 33,2392654 | 0,04252281 | 0,33806525 | 0          | 1,23273107 | -0,0567671 | 2,14123616 |
| k | 0,21208569 | 0,21425108 | 56,1952667 | 34,4151154 | 0,06623581 | 1,39671332 | 0          | 0,17408301 | 0,06653868 | 1,88990776 |
| k | 0,25441635 | 0,2283981  | 56,5511246 | 31,7144032 | 0,05233727 | 0,64350111 | 0,10016742 | 0,91690926 | 0,08120484 | 2,23381889 |

|   |            |            |            |            |            |            |            |            |            |            |
|---|------------|------------|------------|------------|------------|------------|------------|------------|------------|------------|
| k | 0,21554586 | 0,22537769 | 57,6850395 | 32,5042381 | 0,0492276  | 1,26610367 | 0          | 0,30469265 | -0,0015534 | 1,86105252 |
| k | 0          | 0,36378874 | 62,8756561 | 24,4513779 | 0,01111328 | 0          | 0          | 1,57079633 | -0,0905365 | 2,36964244 |
| k | 0,19788935 | 0,23005065 | 58,467041  | 32,23946   | 0,04784178 | 0,96953211 | 0          | 0,60126422 | -0,197446  | 1,74971462 |
| k | 0          | 0,22688647 | 61,3429985 | 33,3925972 | 0,04522448 | 0          | 0          | 1,57079633 | -0,2046367 | 1,96562292 |
| k | 0          | 0,24109841 | 62,6544075 | 31,5505829 | 0,03065231 | 0          | 0          | 1,57079633 | -0,1484484 | 2,46051186 |
| k | 0,08437677 | 0,24315838 | 60,7440453 | 31,394352  | 0,11675512 | 0          | 0          | 1,57079633 | -0,2706175 | 2,01464844 |
| k | 0,08437677 | 0,24315838 | 60,7440453 | 31,394352  | 0,11675512 | 0          | 0          | 1,57079633 | -0,2706175 | 2,01464844 |
| k | 0,08437677 | 0,24315838 | 60,7440453 | 31,394352  | 0,11675512 | 0          | 0          | 1,57079633 | -0,2706175 | 2,01464844 |
| k | 0,18204669 | 0,32381785 | 63,4239349 | 23,1671104 | 0,00832356 | 0          | 0          | 1,57079633 | 0,01670181 | 1,56848174 |
| k | 0,13509478 | 0,3456175  | 64,4325027 | 22,2698441 | 0,00814564 | 0          | 0,17408301 | 1,39671332 | 0,01347033 | 2,36964244 |
| k | 0          | 0,3656949  | 62,8948021 | 24,3072205 | 0,01015842 | 1,00212082 | 0          | 0,5686755  | -0,1481912 | 2,27013816 |
| k | 0          | 0,21353575 | 59,1028709 | 35,9993439 | 0,06383362 | 0,17408301 | 0,20135792 | 1,303033   | -0,1434728 | 1,52993819 |
| k | 0,19143017 | 0,39531651 | 65,3624878 | 16,1872768 | 0          | 0,98029631 | 0          | 0,59050002 | 0,03520896 | 3,50956115 |
| k | 0,13935274 | 0,32967138 | 63,7913742 | 23,7864571 | 0,01119845 | 0          | 0,20135792 | 1,36943841 | 0,03423521 | 1,92887905 |
| k | 0          | 0,37264511 | 62,6348915 | 24,0984936 | 0,01057044 | 0          | 0          | 1,57079633 | -0,0253059 | 2,31465482 |
| k | 0,13002948 | 0,26971889 | 60,9210281 | 30,1430588 | 0,03932056 | 0          | 0          | 1,57079633 | -0,0756418 | 1,87264797 |
| k | 0,13002948 | 0,26971889 | 60,9210281 | 30,1430588 | 0,03932056 | 0          | 0          | 1,57079633 | -0,0756418 | 1,87264797 |
| k | 0,13002948 | 0,26971889 | 60,9210281 | 30,1430588 | 0,03932056 | 0          | 0          | 1,57079633 | -0,0756418 | 1,87264797 |
| k | 0          | 0,21694352 | 58,7695351 | 36,1909676 | 0,06379442 | 0          | 0          | 1,57079633 | -0,2337737 | 1,70807488 |
| k | 0          | 0,21784073 | 59,4253235 | 35,5671196 | 0,05805778 | 0          | 0          | 1,57079633 | -0,3139912 | 1,70671753 |
| k | 0          | 0,22235237 | 59,9200363 | 34,8866234 | 0,05749688 | 0          | 0          | 1,57079633 | -0,2648727 | 2,08937162 |
| k | 0          | 0,29109372 | 65,4929428 | 26,2611828 | 0,00947168 | 0          | 0          | 1,57079633 | -0,1505141 | 1,15180315 |
| k | 0          | 0,21287098 | 59,6734619 | 35,5829353 | 0,05296151 | 0,26776333 | 0          | 1,303033   | -0,2137319 | 0,95435663 |
| k | 0          | 0,22362603 | 59,8899269 | 34,8547516 | 0,05810756 | 0          | 0          | 1,57079633 | -0,3268942 | 2,05731022 |
| k | 0          | 0,23945094 | 61,9364319 | 32,2503204 | 0,04340971 | 0          | 0,17408301 | 1,39671332 | -0,1897414 | 1,19088008 |
| k | 0          | 0,31293734 | 72,8126602 | 17,7098885 | 0          | 0,71516746 | 0          | 0,85562887 | -0,1955342 | 2,1052836  |
| k | 0          | 0,31293734 | 72,8126602 | 17,7098885 | 0          | 0,71516746 | 0          | 0,85562887 | -0,1955342 | 2,1052836  |
| k | 0          | 0,31293734 | 72,8126602 | 17,7098885 | 0          | 0,71516746 | 0          | 0,85562887 | -0,1955342 | 2,1052836  |
| k | 0          | 0,30266209 | 65,6693573 | 25,4377594 | 0,00936069 | 0          | 0          | 1,57079633 | -0,3549168 | 1,81691061 |

|   |            |            |            |            |            |            |            |            |            |            |
|---|------------|------------|------------|------------|------------|------------|------------|------------|------------|------------|
| k | 0          | 0,26641897 | 62,7188568 | 30,2076168 | 0,03768809 | 0          | 0,20135792 | 1,36943841 | -0,2447527 | 1,49862401 |
| k | 0          | 0,28739611 | 65,7364273 | 26,2211876 | 0,00874711 | 0          | 0          | 1,57079633 | -0,0881111 | 1,90335927 |
| k | 0          | 0,27845518 | 71,1901245 | 21,2544842 | 0          | 0          | 0          | 1,57079633 | -0,3533391 | 1,34966409 |
| k | 0          | 0,31281461 | 67,2520065 | 23,2660236 | 0,01082241 | 0,45102681 | 0          | 1,11976951 | -0,0253504 | 2,23217227 |
| k | 0          | 0,31137473 | 67,1972809 | 23,4052563 | 0,01065759 | 0          | 0          | 1,57079633 | -0,1982939 | 2,22013897 |
| k | 0          | 0,30249727 | 67,236496  | 23,8887634 | 0          | 0,81541619 | 0          | 0,75538013 | -0,1193674 | 2,17970259 |
| k | 0          | 0,27412374 | 63,5998764 | 29,0157661 | 0,02373364 | 0          | 0          | 1,57079633 | -0,1604796 | 1,33022237 |
| k | 0          | 0,27412374 | 63,5998764 | 29,0157661 | 0,02373364 | 0          | 0          | 1,57079633 | -0,1604796 | 1,33022237 |
| k | 0          | 0,27412374 | 63,5998764 | 29,0157661 | 0,02373364 | 0          | 0          | 1,57079633 | -0,1604796 | 1,33022237 |
| k | 0          | 0,25563155 | 69,9904861 | 23,6089153 | 0,00834096 | 0          | 0          | 1,57079633 | -0,2266585 | 2,36142031 |
| k | 0          | 0,25670053 | 69,7965622 | 23,7486229 | 0,0093671  | 0          | 0          | 1,57079633 | -0,1379077 | 1,74240891 |
| k | 0,2065054  | 0,31281627 | 68,7758102 | 17,5496635 | 0          | 0          | 0,14189705 | 1,42889927 | -0,1947918 | 3,40440431 |
| k | 0          | 0,36618164 | 67,7045441 | 19,4752693 | 0          | 0          | 0          | 1,57079633 | -0,1555839 | 2,27858014 |
| k | 0,18554058 | 0,29888778 | 68,6837845 | 19,2459908 | 0          | 0          | 0,14189705 | 1,42889927 | 0,07438666 | 2,26692489 |
| k | 0,20791581 | 0,39189816 | 65,0845261 | 16,0664349 | 0          | 0          | 0,10016742 | 1,47062891 | 0,16706905 | 2,44577529 |
| k | 0          | 0,24043948 | 61,2111549 | 32,9493713 | 0,04111    | 0          | 0,20135792 | 1,36943841 | -0,169265  | 1,55646371 |
| k | 0          | 0,24043948 | 61,2111549 | 32,9493713 | 0,04111    | 0          | 0,20135792 | 1,36943841 | -0,169265  | 1,55646371 |
| k | 0          | 0,24043948 | 61,2111549 | 32,9493713 | 0,04111    | 0          | 0,20135792 | 1,36943841 | -0,169265  | 1,55646371 |
| k | 0,13260358 | 0,26240504 | 59,8187599 | 31,0190067 | 0,08286563 | 0          | 0          | 1,57079633 | -0,1306553 | 2,23766133 |
| k | 0          | 0,37447413 | 61,0487518 | 25,4548321 | 0,03416613 | 0          | 0          | 1,57079633 | -0,0014604 | 1,73507237 |
| k | 0          | 0,35296369 | 67,4658203 | 20,5763474 | 0,00913468 | 0          | 0          | 1,57079633 | -0,018087  | 1,82989534 |
| k | 0          | 0,33010693 | 67,6797638 | 21,8062897 | 0,00836849 | 0          | 0          | 1,57079633 | -0,0817847 | 1,88071112 |
| k | 0          | 0,24894514 | 62,3174744 | 31,4986973 | 0,03368589 | 0          | 0          | 1,57079633 | -0,15434   | 2,14652258 |
| k | 0          | 0,32478449 | 67,2978058 | 22,5097218 | 0,00985105 | 0          | 0          | 1,57079633 | -0,0537262 | 2,10656845 |
| k | 0          | 0,33848256 | 62,4326134 | 26,5250797 | 0,01272119 | 0          | 0          | 1,57079633 | -0,1843472 | 1,66083784 |
| k | 0          | 0,32167149 | 65,1269913 | 24,8630924 | 0,01210732 | 0          | 0          | 1,57079633 | -0,2281151 | 2,30293502 |
| k | 0          | 0,32167149 | 65,1269913 | 24,8630924 | 0,01210732 | 0          | 0          | 1,57079633 | -0,2281151 | 2,30293502 |
| k | 0          | 0,32167149 | 65,1269913 | 24,8630924 | 0,01210732 | 0          | 0          | 1,57079633 | -0,2281151 | 2,30293502 |
| k | 0          | 0,24217667 | 69,0969315 | 25,1518784 | 0          | 0          | 0          | 1,57079633 | -0,0974133 | 2,05172225 |

|   |            |            |            |            |            |            |            |            |            |            |
|---|------------|------------|------------|------------|------------|------------|------------|------------|------------|------------|
| k | 0          | 0,24711964 | 63,5011444 | 30,4943123 | 0,01450361 | 0          | 0,10016742 | 1,47062891 | -0,1718973 | 1,87110229 |
| k | 0          | 0,2363383  | 61,8659058 | 32,5090294 | 0,03778544 | 0          | 0,10016742 | 1,47062891 | -0,2172852 | 1,32508907 |
| k | 0          | 0,24936743 | 62,1138802 | 31,6802197 | 0,03396562 | 0          | 0,10016742 | 1,47062891 | -0,16482   | 2,3491181  |
| k | 0          | 0,25671551 | 56,4171829 | 36,3082542 | 0,09110868 | 0          | 0,10016742 | 1,47062891 | -0,1664724 | 1,44683823 |
| k | 0          | 0,2953116  | 60,7547874 | 30,6945229 | 0,02835464 | 0          | 0          | 1,57079633 | -0,1240409 | 2,41657065 |
| k | 0,14689075 | 0,25952797 | 61,9837875 | 29,2679539 | 0,01429664 | 0,41151685 | 0          | 1,15927948 | -0,100736  | 2,79157877 |
| k | 0          | 0,15591239 | 52,0465851 | 44,3534775 | 0,10924487 | 0          | 0,26776333 | 1,303033   | -0,2439958 | 2,14652258 |
| k | 0          | 0,15591239 | 52,0465851 | 44,3534775 | 0,10924487 | 0          | 0,26776333 | 1,303033   | -0,2439958 | 2,14652258 |
| k | 0          | 0,15591239 | 52,0465851 | 44,3534775 | 0,10924487 | 0          | 0,26776333 | 1,303033   | -0,2439958 | 2,14652258 |
| k | 0          | 0,22826952 | 60,5384521 | 34,1429825 | 0,04448331 | 0,42498878 | 0          | 1,14580754 | -0,0618978 | 2,86807462 |
| k | 0,20675158 | 0,22023762 | 55,1881218 | 35,1851692 | 0,08009235 | 0,87589139 | 0,10016742 | 0,6847192  | -0,2042844 | 2,51826945 |
| k | 0          | 0,24311449 | 54,5625648 | 38,3166199 | 0,11540298 | 0          | 0,20135792 | 1,36943841 | -0,1486226 | 1,98125976 |
| k | 0          | 0,26770488 | 63,1918144 | 29,7372932 | 0,02718312 | 0          | 0,26776333 | 1,303033   | -0,1420524 | 1,88990776 |
| k | 0          | 0,18637626 | 55,5568428 | 40,1237068 | 0,0942603  | 0          | 0          | 1,57079633 | -0,2535926 | 1,92174964 |
| k | 0          | 0,23614602 | 60,7288704 | 33,4816628 | 0,05623141 | 0          | 0          | 1,57079633 | -0,289087  | 1,53741956 |
| k | 0          | 0,24516577 | 55,4715233 | 37,518383  | 0,10597775 | 0          | 0,22551341 | 1,34528292 | -0,1830325 | 1,84253413 |
| k | 0,29463999 | 0,30431424 | 53,1133003 | 29,0289268 | 0,06686831 | 1,47062891 | 0          | 0,10016742 | 0,0326101  | 3,00013558 |
| k | 0,29463999 | 0,30431424 | 53,1133003 | 29,0289268 | 0,06686831 | 1,47062891 | 0          | 0,10016742 | 0,0326101  | 3,00013558 |
| k | 0,29463999 | 0,30431424 | 53,1133003 | 29,0289268 | 0,06686831 | 1,47062891 | 0          | 0,10016742 | 0,0326101  | 3,00013558 |
| k | 0,18036363 | 0,25278696 | 59,4889336 | 30,7713737 | 0,05165096 | 0,28675655 | 0,10016742 | 1,26610367 | -0,0427657 | 2,79983117 |
| k | 0          | 0,19163549 | 56,2310104 | 39,4191055 | 0,08508515 | 0          | 0,22551341 | 1,34528292 | -0,2108334 | 2,62894253 |
| k | 0          | 0,20847648 | 57,7998009 | 37,306633  | 0,07817711 | 0          | 0,20135792 | 1,36943841 | -0,2710491 | 2,23300385 |
| k | 0          | 0,19709765 | 56,3523102 | 38,9720078 | 0,09183393 | 0          | 0,10016742 | 1,47062891 | -0,2670814 | 1,53204146 |
| k | 0          | 0,16074965 | 61,496666  | 35,8106384 | 0,03617818 | 0,63305184 | 0,17408301 | 0,90658109 | -0,172484  | 1,18695302 |
| k | 0          | 0,19858551 | 57,6383705 | 37,9272232 | 0,07371156 | 0          | 0,20135792 | 1,36943841 | -0,2368898 | 2,03582401 |
| k | 0          | 0,22559199 | 54,4931908 | 39,2202339 | 0,11352001 | 0          | 0,17408301 | 1,39671332 | -0,3243352 | 2,10875088 |
| k | 0          | 0,20994067 | 59,9744148 | 35,413044  | 0,05192757 | 0          | 0,10016742 | 1,47062891 | -0,2628208 | 2,18227755 |
| k | 0          | 0,20994067 | 59,9744148 | 35,413044  | 0,05192757 | 0          | 0,10016742 | 1,47062891 | -0,2628208 | 2,18227755 |
| k | 0          | 0,17907607 | 62,697361  | 34,0246239 | 0,03245905 | 0,36886298 | 0          | 1,20193334 | -0,202835  | 2,14994576 |

|   |   |            |            |            |            |            |            |            |            |            |
|---|---|------------|------------|------------|------------|------------|------------|------------|------------|------------|
| k | 0 | 0,1987253  | 58,6536713 | 37,0279427 | 0,06492403 | 0,33806525 | 0,17408301 | 1,18729932 | -0,2034009 | 1,57778406 |
| k | 0 | 0,18202475 | 63,3345184 | 33,3067703 | 0,02861177 | 0,50017961 | 0,20135792 | 1,02439576 | -0,1305945 | 2,37584571 |
| k | 0 | 0,18125662 | 57,1462402 | 39,002018  | 0,07767758 | 0,42498878 | 0,10016742 | 1,1326473  | -0,2048432 | 2,6170452  |
| k | 0 | 0,14189859 | 58,1753159 | 39,5222435 | 0,05501848 | 0,39769942 | 0          | 1,17309691 | -0,2851285 | 2,83060191 |
| k | 0 | 0,16131949 | 60,7866783 | 36,4602318 | 0,04162812 | 0,50017961 | 0          | 1,07061672 | -0,1544396 | 2,5249904  |
| k | 0 | 0,19335854 | 58,6891747 | 37,224781  | 0,06278341 | 0,17408301 | 0,10016742 | 1,36943841 | -0,1730243 | 1,74766937 |
| k | 0 | 0,15683288 | 60,3138313 | 37,0618858 | 0,04299359 | 0,71516746 | 0,26776333 | 0,78539816 | -0,2996955 | 2,32565094 |
| k | 0 | 0,15683288 | 60,3138313 | 37,0618858 | 0,04299359 | 0,71516746 | 0,26776333 | 0,78539816 | -0,2996955 | 2,32565094 |
| k | 0 | 0,15683288 | 60,3138313 | 37,0618858 | 0,04299359 | 0,71516746 | 0,26776333 | 0,78539816 | -0,2996955 | 2,32565094 |
| k | 0 | 0,16064813 | 54,9875526 | 41,5718422 | 0,09405068 | 0,39769942 | 0,17408301 | 1,1326473  | -0,1168907 | 2,68938593 |
| k | 0 | 0,15831541 | 54,6505508 | 42,0042343 | 0,09285381 | 0,51197269 | 0          | 1,05882364 | -0,2869869 | 2,59819367 |
| k | 0 | 0,1345666  | 57,7794647 | 40,1144028 | 0,05536543 | 0,46364761 | 0          | 1,10714872 | -0,0859641 | 2,5249904  |
| k | 0 | 0,14482608 | 58,9472885 | 38,7065315 | 0,0513398  | 0,33806525 | 0          | 1,23273107 | -0,102563  | 3,24178832 |
| k | 0 | 0,11791467 | 54,1881714 | 43,8231354 | 0,07784363 | 0          | 0          | 1,57079633 | -0,2343192 | 2,97276356 |
| k | 0 | 0,1342568  | 57,2905846 | 40,5588913 | 0,05993897 | 0          | 0          | 1,57079633 | -0,2020655 | 2,42338269 |
| k | 0 | 0,13317786 | 56,8564148 | 40,9709435 | 0,06403359 | 0,22551341 | 0          | 1,34528292 | -0,1146999 | 2,21517172 |
| k | 0 | 0,13163131 | 56,6734428 | 41,2049217 | 0,06320369 | 0          | 0,10016742 | 1,47062891 | -0,1767926 | 2,42864261 |
| k | 0 | 0,13163131 | 56,6734428 | 41,2049217 | 0,06320369 | 0          | 0,10016742 | 1,47062891 | -0,1767926 | 2,42864261 |
| k | 0 | 0,13163131 | 56,6734428 | 41,2049217 | 0,06320369 | 0          | 0,10016742 | 1,47062891 | -0,1767926 | 2,42864261 |
| k | 0 | 0,14982619 | 60,0894585 | 37,4999466 | 0,04273911 | 0,41151685 | 0,10016742 | 1,14580754 | -0,2366025 | 2,81551081 |
| k | 0 | 0,16776662 | 56,4847069 | 40,1787491 | 0,07411444 | 0,36886298 | 0          | 1,20193334 | -0,1313912 | 2,78394573 |
| k | 0 | 0,14437445 | 58,7781754 | 38,9299316 | 0,04712774 | 0          | 0          | 1,57079633 | -0,138552  | 2,63144075 |
| k | 0 | 0,13580401 | 57,1017265 | 40,6730537 | 0,06267144 | 0          | 0          | 1,57079633 | -0,114457  | 2,26332575 |
| k | 0 | 0,1776937  | 56,4495544 | 39,8025856 | 0,079041   | 0          | 0          | 1,57079633 | -0,1866653 | 1,94315503 |
| k | 0 | 0,12477155 | 55,4104576 | 42,5522079 | 0,06995712 | 0          | 0,20135792 | 1,36943841 | -0,1895962 | 2,43179093 |
| k | 0 | 0,17056946 | 55,9474716 | 40,5046844 | 0,08173392 | 0          | 0          | 1,57079633 | -0,1589653 | 2,17970259 |
| k | 0 | 0,13890185 | 57,4200401 | 40,2731323 | 0,06247684 | 0          | 0          | 1,57079633 | -0,2275901 | 2,1621268  |
| k | 0 | 0,13890185 | 57,4200401 | 40,2731323 | 0,06247684 | 0          | 0          | 1,57079633 | -0,2275901 | 2,1621268  |
| k | 0 | 0,13890185 | 57,4200401 | 40,2731323 | 0,06247684 | 0          | 0          | 1,57079633 | -0,2275901 | 2,1621268  |

|   |   |            |            |            |            |   |            |            |            |            |
|---|---|------------|------------|------------|------------|---|------------|------------|------------|------------|
| k | 0 | 0,12751462 | 55,6513786 | 42,2638283 | 0,06843396 | 0 | 0          | 1,57079633 | -0,1715228 | 2,08318934 |
| k | 0 | 0,13294724 | 56,4508095 | 41,3736153 | 0,06473423 | 0 | 0          | 1,57079633 | -0,2031558 | 2,23132361 |
| k | 0 | 0,14921591 | 58,5977478 | 38,9175301 | 0,05243213 | 0 | 0          | 1,57079633 | -0,248554  | 2,2922905  |
| k | 0 | 0,14585329 | 58,2963448 | 39,272171  | 0,0565286  | 0 | 0          | 1,57079633 | -0,0816505 | 2,51435877 |
| k | 0 | 0,1765006  | 55,5371094 | 40,6339035 | 0,08647643 | 0 | 0          | 1,57079633 | -0,1568014 | 1,96629829 |
| k | 0 | 0,15674156 | 60,524147  | 36,8826752 | 0,03956269 | 0 | 0          | 1,57079633 | -0,1317554 | 2,30281513 |
| k | 0 | 0,13859263 | 57,5314026 | 40,2162209 | 0,05867238 | 0 | 0          | 1,57079633 | -0,2220765 | 2,48382543 |
| k | 0 | 0,14745625 | 58,2460365 | 39,2893257 | 0,05534678 | 0 | 0          | 1,57079633 | -0,2008926 | 2,3575225  |
| k | 0 | 0,14745625 | 58,2460365 | 39,2893257 | 0,05534678 | 0 | 0          | 1,57079633 | -0,2008926 | 2,3575225  |
| k | 0 | 0,14745625 | 58,2460365 | 39,2893257 | 0,05534678 | 0 | 0          | 1,57079633 | -0,2008926 | 2,3575225  |
| k | 0 | 0,12260917 | 53,7644997 | 44,057766  | 0,0826746  | 0 | 0          | 1,57079633 | -0,3010726 | 2,22294864 |
| k | 0 | 0,12550908 | 55,1391983 | 42,7891731 | 0,07109706 | 0 | 0          | 1,57079633 | -0,1772197 | 2,46051186 |
| k | 0 | 0,19338715 | 57,1834068 | 38,5656815 | 0,07473158 | 0 | 0          | 1,57079633 | -0,3120882 | 2,07029027 |
| k | 0 | 0,14436518 | 57,6195908 | 39,9885521 | 0,05678992 | 0 | 0          | 1,57079633 | -0,1417297 | 2,39276147 |
| k | 0 | 0,1697484  | 63,7670555 | 33,3679314 | 0,01055055 | 0 | 0          | 1,57079633 | 0,00610476 | 3,70851509 |
| k | 0 | 0,13364299 | 56,2101212 | 41,5677185 | 0,06688698 | 0 | 0          | 1,57079633 | -0,1217398 | 2,83017989 |
| k | 0 | 0,17669135 | 55,8591423 | 40,4108887 | 0,08010671 | 0 | 0          | 1,57079633 | -0,2208249 | 2,57749053 |
| k | 0 | 0,15783663 | 54,0558395 | 42,5997887 | 0,09361142 | 0 | 0,17408301 | 1,39671332 | -0,1164254 | 4,2768793  |
| k | 0 | 0,15783663 | 54,0558395 | 42,5997887 | 0,09361142 | 0 | 0,17408301 | 1,39671332 | -0,1164254 | 4,2768793  |
| k | 0 | 0,15783663 | 54,0558395 | 42,5997887 | 0,09361142 | 0 | 0,17408301 | 1,39671332 | -0,1164254 | 4,2768793  |
| k | 0 | 0,16454279 | 54,4385605 | 42,0782356 | 0,08956892 | 0 | 0,20135792 | 1,36943841 | -0,1974775 | 2,91866873 |
| k | 0 | 0,23673218 | 57,4805832 | 36,4768333 | 0,07370659 | 0 | 0,28675655 | 1,28403977 | -0,0096009 | 3,56443961 |
| k | 0 | 0,23952378 | 64,0375748 | 30,3210297 | 0,01145101 | 0 | 0          | 1,57079633 | 0,03705773 | 3,1746976  |

| Harbour | tseagrass | tshell     | tsand      | tchla      | chla2    | tmgs       | mgs2    | tsilt | tveryfine  | tfine      |
|---------|-----------|------------|------------|------------|----------|------------|---------|-------|------------|------------|
| m       | 0         | 0,22551341 | 1,34528292 | 4,09948411 | 16,80577 | 13,9377186 | 194,26  | 0     | 0,32035643 | 0,95119749 |
| m       | 0         | 0,26776333 | 1,303033   | 3,65979098 | 13,39407 | 13,773126  | 189,699 | 0     | 0,33778854 | 0,96568453 |
| m       | 0         | 0,39769942 | 1,17309691 | 3,35741418 | 11,27223 | 13,8349557 | 191,406 | 0     | 0,33520596 | 0,95556986 |
| m       | 0         | 0,20135792 | 1,36943841 | 3,88977377 | 15,13034 | 13,8956468 | 193,089 | 0     | 0,32444158 | 0,9554101  |

|   |            |            |            |            |          |            |         |            |            |            |
|---|------------|------------|------------|------------|----------|------------|---------|------------|------------|------------|
| m | 0,10016742 | 0,26776333 | 1,28403977 | 4,34576115 | 18,88564 | 13,911506  | 193,53  | 0          | 0,32570161 | 0,9503101  |
| m | 0          | 0          | 1,57079633 | 3,58802313 | 12,87391 | 13,8367988 | 191,457 | 0          | 0,33157549 | 0,95905909 |
| m | 0          | 0          | 1,57079633 | 3,58802313 | 12,87391 | 13,8367988 | 191,457 | 0          | 0,33157549 | 0,95905909 |
| m | 0          | 0          | 1,57079633 | 3,58802313 | 12,87391 | 13,8367988 | 191,457 | 0          | 0,33157549 | 0,95905909 |
| m | 0          | 0          | 1,57079633 | 5,20154016 | 27,05602 | 14,042222  | 197,184 | 0          | 0,33548769 | 0,90986488 |
| m | 0          | 0,30469265 | 1,26610367 | 4,06854397 | 16,55305 | 13,7145543 | 188,089 | 0          | 0,34650856 | 0,96699351 |
| m | 0          | 0,17408301 | 1,39671332 | 4,78981315 | 22,94231 | 10,8258487 | 117,199 | 0,53874647 | 0,55304382 | 0,67316454 |
| m | 0          | 0          | 1,57079633 | 4,35863625 | 18,99771 | 12,1412932 | 147,411 | 0,31524645 | 0,54865164 | 0,801788   |
| m | 0          | 0,17408301 | 1,39671332 | 4,43633633 | 19,68108 | 11,2269764 | 126,045 | 0,501303   | 0,53922059 | 0,7029699  |
| m | 0          | 0,17408301 | 1,39671332 | 4,26679388 | 18,20553 | 11,3699604 | 129,276 | 0,45646593 | 0,55991714 | 0,72777409 |
| m | 0          | 0,17408301 | 1,39671332 | 5,58273858 | 31,16697 | 9,54929317 | 91,189  | 0,67993336 | 0,51583129 | 0,58450024 |
| m | 0          | 0          | 1,57079633 | 5,35922569 | 28,7213  | 8,44653775 | 71,344  | 0,74335413 | 0,54110573 | 0,50525227 |
| m | 0          | 0          | 1,57079633 | 5,35922569 | 28,7213  | 8,44653775 | 71,344  | 0,74335413 | 0,54110573 | 0,50525227 |
| m | 0          | 0          | 1,57079633 | 5,35922569 | 28,7213  | 8,44653775 | 71,344  | 0,74335413 | 0,54110573 | 0,50525227 |
| m | 0          | 0          | 1,57079633 | 4,87824046 | 23,79723 | 11,3718952 | 129,32  | 0,48330454 | 0,5370869  | 0,7150607  |
| m | 0          | 0          | 1,57079633 | 4,4444201  | 19,75287 | 11,3181271 | 128,1   | 0,48262071 | 0,54469518 | 0,71360543 |
| m | 0          | 0,17408301 | 1,39671332 | 4,20477942 | 17,68017 | 13,7805297 | 189,903 | 0          | 0,33759101 | 0,96431481 |
| m | 0          | 0,54640056 | 1,02439576 | 4,4322263  | 19,64463 | 13,9853852 | 195,591 | 0,09452209 | 0,30622592 | 0,93951142 |
| m | 0          | 0,26776333 | 1,303033   | 4,36586647 | 19,06079 | 13,8097791 | 190,71  | 0          | 0,33220266 | 0,96513799 |
| m | 0,41151685 | 0,26776333 | 1,07061672 | 4,88276971 | 23,84144 | 13,9156387 | 193,645 | 0          | 0,31673537 | 0,96103    |
| m | 0          | 0,30469265 | 1,26610367 | 4,51269875 | 20,36445 | 14,0310727 | 196,871 | 0          | 0,30182822 | 0,95298956 |
| m | 0          | 0,61193971 | 0,95885661 | 5,71534076 | 32,66512 | 13,9628435 | 194,961 | 0          | 0,31134725 | 0,95715683 |
| m | 0          | 0,61193971 | 0,95885661 | 5,71534076 | 32,66512 | 13,9628435 | 194,961 | 0          | 0,31134725 | 0,95715683 |
| m | 0          | 0,61193971 | 0,95885661 | 5,71534076 | 32,66512 | 13,9628435 | 194,961 | 0          | 0,31134725 | 0,95715683 |
| m | 0          | 0,59050002 | 0,98029631 | 4,03876095 | 16,31159 | 13,8898524 | 192,928 | 0          | 0,34673124 | 0,92780957 |
| m | 0          | 0,64350111 | 0,92729522 | 4,78236343 | 22,871   | 13,9288908 | 194,014 | 0          | 0,34605406 | 0,91991843 |
| m | 0          | 0,65388706 | 0,91690926 | 4,71531017 | 22,23415 | 13,7302221 | 188,519 | 0,24456601 | 0,31189474 | 0,91422563 |
| m | 0          | 0,98029631 | 0,59050002 | 5,13752762 | 26,39419 | 13,833257  | 191,359 | 0,22078524 | 0,39349464 | 0,78989892 |
| m | 0          | 0,69490494 | 0,87589139 | 6,79675437 | 46,19587 | 13,9044238 | 193,333 | 0          | 0,34563154 | 0,92549356 |

|   |            |            |            |            |          |            |         |            |            |            |
|---|------------|------------|------------|------------|----------|------------|---------|------------|------------|------------|
| m | 0          | 0,7753975  | 0,79539883 | 4,52520386 | 20,47747 | 13,6358718 | 185,937 | 0,24782508 | 0,32208108 | 0,91972062 |
| m | 0,28675655 | 0,73531445 | 0,75538013 | 4,29716302 | 18,46561 | 14,3522124 | 205,986 | 0,19588424 | 0,29782371 | 0,83418172 |
| m | 0          | 0,88607712 | 0,6847192  | 4,26352671 | 18,17766 | 14,4581119 | 209,037 | 0,22327198 | 0,33050238 | 0,76366562 |
| m | 0          | 0,88607712 | 0,6847192  | 4,26352671 | 18,17766 | 14,4581119 | 209,037 | 0,22327198 | 0,33050238 | 0,76366562 |
| m | 0          | 0,88607712 | 0,6847192  | 4,26352671 | 18,17766 | 14,4581119 | 209,037 | 0,22327198 | 0,33050238 | 0,76366562 |
| m | 0          | 1,15927948 | 0,41151685 | 5,107889   | 26,09053 | 13,856623  | 192,006 | 0,29727092 | 0,37980096 | 0,74364646 |
| m | 0          | 1,20193334 | 0,36886298 | 4,7917909  | 22,96126 | 13,3466101 | 178,132 | 0,25591672 | 0,40607033 | 0,84621088 |
| m | 0          | 0,8963054  | 0,67449093 | 4,96651789 | 24,6663  | 14,0333888 | 196,936 | 0,22539615 | 0,39022442 | 0,75428679 |
| m | 0          | 0,73531445 | 0,83548187 | 4,70544472 | 22,14121 | 12,3912066 | 153,542 | 0,39443906 | 0,48298842 | 0,73241506 |
| m | 0          | 0,67449093 | 0,8963054  | 4,92554058 | 24,26095 | 13,5735036 | 184,24  | 0,25789884 | 0,41549911 | 0,77486578 |
| m | 0          | 0,71516746 | 0,85562887 | 5,38706599 | 29,02048 | 12,5669408 | 157,928 | 0,38645119 | 0,46943846 | 0,72837473 |
| m | 0          | 0,8054035  | 0,76539283 | 6,05567007 | 36,67114 | 12,2033192 | 148,921 | 0,34520419 | 0,52939791 | 0,76328476 |
| m | 0          | 0,6847192  | 0,88607712 | 4,30525493 | 18,53522 | 12,1912674 | 148,627 | 0,31715604 | 0,52843819 | 0,8338794  |
| m | 0          | 0,6847192  | 0,88607712 | 4,30525493 | 18,53522 | 12,1912674 | 148,627 | 0,31715604 | 0,52843819 | 0,8338794  |
| m | 0          | 0,6847192  | 0,88607712 | 4,30525493 | 18,53522 | 12,1912674 | 148,627 | 0,31715604 | 0,52843819 | 0,8338794  |
| m | 0          | 0,60126422 | 0,96953211 | 4,5919179  | 21,08571 | 12,6860947 | 160,937 | 0,33698755 | 0,48032207 | 0,75966731 |
| m | 0          | 0,5686755  | 1,00212082 | 4,80742447 | 23,11133 | 12,6242624 | 159,372 | 0,34954493 | 0,48208888 | 0,75150191 |
| m | 0          | 0,81541619 | 0,75538013 | 3,64280798 | 13,27005 | 12,4757765 | 155,645 | 0,3775557  | 0,48134773 | 0,74986095 |
| m | 0          | 0,59050002 | 0,98029631 | 5,6604514  | 32,04071 | 11,3181712 | 128,101 | 0,58051893 | 0,44897569 | 0,6159712  |
| m | 0          | 0,59050002 | 0,98029631 | 4,78003138 | 22,8487  | 12,6220046 | 159,315 | 0,31610653 | 0,49116114 | 0,79513898 |
| m | 0          | 0,69490494 | 0,87589139 | 4,37857283 | 19,1719  | 12,5394178 | 157,237 | 0,3621381  | 0,48103539 | 0,76083278 |
| m | 0          | 0,61193971 | 0,95885661 | 4,43726042 | 19,68928 | 13,062006  | 170,616 | 0,32352187 | 0,45286622 | 0,7445373  |
| m | 0          | 0,91690926 | 0,65388706 | 5,54324544 | 30,72757 | 12,6931084 | 161,115 | 0,40989509 | 0,44476409 | 0,71976635 |
| m | 0          | 0,91690926 | 0,65388706 | 5,54324544 | 30,72757 | 12,6931084 | 161,115 | 0,40989509 | 0,44476409 | 0,71976635 |
| m | 0          | 0,91690926 | 0,65388706 | 5,54324544 | 30,72757 | 12,6931084 | 161,115 | 0,40989509 | 0,44476409 | 0,71976635 |
| m | 0          | 0,71516746 | 0,85562887 | 5,43559932 | 29,54574 | 12,5265318 | 156,914 | 0,47589263 | 0,42411279 | 0,66605181 |
| m | 0          | 0,72525322 | 0,8455431  | 4,93486069 | 24,35285 | 12,4112449 | 154,039 | 0,44770953 | 0,44945169 | 0,70397648 |
| m | 0          | 0,64350111 | 0,92729522 | 5,45143009 | 29,71809 | 11,5994827 | 134,548 | 0,54460639 | 0,45772378 | 0,64074304 |
| m | 0          | 0,59050002 | 0,98029631 | 4,89711752 | 23,98176 | 10,3834965 | 107,817 | 0,61720813 | 0,50789469 | 0,62419533 |



|   |   |            |            |            |          |            |         |            |            |            |
|---|---|------------|------------|------------|----------|------------|---------|------------|------------|------------|
| m | 0 | 0,28675655 | 1,28403977 | 5,20179969 | 27,05872 | 12,6743836 | 160,64  | 0,4601014  | 0,41915777 | 0,68025476 |
| m | 0 | 0,67449093 | 0,8963054  | 4,67911851 | 21,89415 | 13,357657  | 178,427 | 0,30126536 | 0,43505596 | 0,74524672 |
| m | 0 | 0,26776333 | 1,303033   | 5,22774426 | 27,32931 | 11,299115  | 127,67  | 0,59495566 | 0,43382063 | 0,61301997 |
| m | 0 | 0,36886298 | 1,20193334 | 5,34461411 | 28,5649  | 11,9565463 | 142,959 | 0,51151188 | 0,44920313 | 0,66766894 |
| m | 0 | 0,36886298 | 1,20193334 | 5,34461411 | 28,5649  | 11,9565463 | 142,959 | 0,51151188 | 0,44920313 | 0,66766894 |
| m | 0 | 0,36886298 | 1,20193334 | 5,34461411 | 28,5649  | 11,9565463 | 142,959 | 0,51151188 | 0,44920313 | 0,66766894 |
| m | 0 | 0,52359878 | 1,04719755 | 4,52065371 | 20,43631 | 11,5094309 | 132,467 | 0,46721385 | 0,532944   | 0,72434002 |
| m | 0 | 0,35374161 | 1,21705472 | 4,47460166 | 20,02206 | 12,1308285 | 147,157 | 0,38365088 | 0,51295119 | 0,7723898  |
| m | 0 | 0,54640056 | 1,02439576 | 4,86098344 | 23,62916 | 10,9664032 | 120,262 | 0,57806825 | 0,4886902  | 0,62478004 |
| m | 0 | 0,59050002 | 0,98029631 | 5,86064502 | 34,34716 | 8,21821148 | 67,539  | 0,76332329 | 0,51551183 | 0,50119633 |
| m | 0 | 0,42498878 | 1,14580754 | 4,43726042 | 19,68928 | 10,4276555 | 108,736 | 0,62520935 | 0,49302528 | 0,62886467 |
| m | 0 | 0,46364761 | 1,10714872 | 5,3591016  | 28,71997 | 9,10071426 | 82,823  | 0,70719126 | 0,50988871 | 0,55518504 |
| m | 0 | 0,33806525 | 1,23273107 | 5,76247603 | 33,20613 | 7,90601037 | 62,505  | 0,78793507 | 0,508517   | 0,47907348 |
| m | 0 | 0,59050002 | 0,98029631 | 8,67313381 | 75,22325 | 7,5594312  | 57,145  | 0,8187098  | 0,50456657 | 0,45529869 |
| m | 0 | 0,59050002 | 0,98029631 | 8,67313381 | 75,22325 | 7,5594312  | 57,145  | 0,8187098  | 0,50456657 | 0,45529869 |
| m | 0 | 0,59050002 | 0,98029631 | 8,67313381 | 75,22325 | 7,5594312  | 57,145  | 0,8187098  | 0,50456657 | 0,45529869 |
| m | 0 | 0,61193971 | 0,95885661 | 5,6578989  | 32,01182 | 8,12508461 | 66,017  | 0,77079469 | 0,51464173 | 0,49670251 |
| m | 0 | 0,72525322 | 0,8455431  | 5,68431702 | 32,31146 | 8,32394137 | 69,288  | 0,76111842 | 0,48625542 | 0,52461524 |
| m | 0 | 0,76539283 | 0,8054035  | 5,17572604 | 26,78814 | 9,83412426 | 96,71   | 0,64787558 | 0,52797242 | 0,59686526 |
| m | 0 | 0          | 1,57079633 | 5,21478859 | 27,19402 | 10,0534074 | 101,071 | 0,63805506 | 0,51980486 | 0,61342559 |
| m | 0 | 0,95885661 | 0,61193971 | 4,69769305 | 22,06832 | 11,4905178 | 132,032 | 0,45747424 | 0,54369742 | 0,72810749 |
| m | 0 | 0,45102681 | 1,11976951 | 3,97145439 | 15,77245 | 11,9344878 | 142,432 | 0,34496199 | 0,55999603 | 0,78861519 |
| m | 0 | 0,26776333 | 1,303033   | 4,27519824 | 18,27732 | 11,8119854 | 139,523 | 0,38586893 | 0,55309785 | 0,7657399  |
| m | 0 | 0,22551341 | 1,34528292 | 4,78236343 | 22,871   | 10,6860657 | 114,192 | 0,56871671 | 0,53607497 | 0,65722157 |
| m | 0 | 0,22551341 | 1,34528292 | 4,78236343 | 22,871   | 10,6860657 | 114,192 | 0,56871671 | 0,53607497 | 0,65722157 |
| m | 0 | 0,22551341 | 1,34528292 | 4,78236343 | 22,871   | 10,6860657 | 114,192 | 0,56871671 | 0,53607497 | 0,65722157 |
| m | 0 | 0          | 1,57079633 | 4,52145773 | 20,44358 | 10,4570072 | 109,349 | 0,59959703 | 0,52572751 | 0,63980167 |
| m | 0 | 0,20135792 | 1,36943841 | 4,87523333 | 23,7679  | 10,9871288 | 120,717 | 0,53283751 | 0,53891744 | 0,686564   |
| m | 0 | 0,10016742 | 1,47062891 | 4,57745563 | 20,9531  | 11,2372595 | 126,276 | 0,4836855  | 0,55412204 | 0,71378628 |

|   |   |            |            |            |          |            |         |            |            |            |
|---|---|------------|------------|------------|----------|------------|---------|------------|------------|------------|
| m | 0 | 0,17408301 | 1,39671332 | 5,00022599 | 25,00226 | 10,0267143 | 100,535 | 0,62162298 | 0,55072152 | 0,61242197 |
| m | 0 | 0,10016742 | 1,47062891 | 4,73384727 | 22,40931 | 10,7062599 | 114,624 | 0,58026989 | 0,5203622  | 0,6588682  |
| m | 0 | 0          | 1,57079633 | 5,18864915 | 26,92208 | 10,2343051 | 104,741 | 0,61563367 | 0,53311366 | 0,6298009  |
| m | 0 | 0          | 1,57079633 | 5,72847886 | 32,81547 | 10,5390702 | 111,072 | 0,59175215 | 0,52699838 | 0,64972362 |
| m | 0 | 0          | 1,57079633 | 6,03253098 | 36,39143 | 9,05455686 | 81,985  | 0,71135999 | 0,51435846 | 0,55946139 |
| m | 0 | 0          | 1,57079633 | 6,03253098 | 36,39143 | 9,05455686 | 81,985  | 0,71135999 | 0,51435846 | 0,55946139 |
| m | 0 | 0          | 1,57079633 | 6,03253098 | 36,39143 | 9,05455686 | 81,985  | 0,71135999 | 0,51435846 | 0,55946139 |
| m | 0 | 0          | 1,57079633 | 6,01695687 | 36,20377 | 10,1353342 | 102,725 | 0,62739149 | 0,52760928 | 0,62039406 |
| m | 0 | 0          | 1,57079633 | 4,4966532  | 20,21989 | 9,88043521 | 97,623  | 0,63893622 | 0,54050712 | 0,60033726 |
| m | 0 | 0          | 1,57079633 | 5,53138771 | 30,59625 | 11,8215904 | 139,75  | 0,45434999 | 0,50070268 | 0,75534968 |
| m | 0 | 0          | 1,57079633 | 4,48970044 | 20,15741 | 11,9445804 | 142,673 | 0,4021846  | 0,52154431 | 0,77667522 |
| m | 0 | 0          | 1,57079633 | 8,3257288  | 69,31776 | 9,86686374 | 97,355  | 0,67505067 | 0,47789322 | 0,60445982 |
| m | 0 | 0          | 1,57079633 | 6,27828241 | 39,41683 | 11,2989823 | 127,667 | 0,55285822 | 0,47865031 | 0,69785538 |
| m | 0 | 0          | 1,57079633 | 4,4124517  | 19,46973 | 11,9765187 | 143,437 | 0,39388264 | 0,52396393 | 0,77983015 |
| m | 0 | 0          | 1,57079633 | 4,4124517  | 19,46973 | 11,9765187 | 143,437 | 0,39388264 | 0,52396393 | 0,77983015 |
| m | 0 | 0          | 1,57079633 | 4,4124517  | 19,46973 | 11,9765187 | 143,437 | 0,39388264 | 0,52396393 | 0,77983015 |
| m | 0 | 0          | 1,57079633 | 6,26455266 | 39,24462 | 9,41493494 | 88,641  | 0,71536621 | 0,45535541 | 0,58773693 |
| m | 0 | 0          | 1,57079633 | 5,00113687 | 25,01137 | 11,6418212 | 135,532 | 0,47190534 | 0,51100673 | 0,73761547 |
| m | 0 | 0          | 1,57079633 | 5,51734175 | 30,44106 | 10,6107021 | 112,587 | 0,59622019 | 0,51224332 | 0,65339477 |
| m | 0 | 0          | 1,57079633 | 4,96438113 | 24,64508 | 12,0034995 | 144,084 | 0,36123512 | 0,53903186 | 0,7957376  |
| m | 0 | 0,10016742 | 1,47062891 | 4,7577274  | 22,63597 | 11,0005454 | 121,012 | 0,55335766 | 0,51566988 | 0,68811626 |
| m | 0 | 0          | 1,57079633 | 6,19721228 | 38,40544 | 11,7049989 | 137,007 | 0,45394337 | 0,51586287 | 0,75116282 |
| m | 0 | 0          | 1,57079633 | 5,13636642 | 26,38226 | 11,6612178 | 135,984 | 0,44737054 | 0,52809316 | 0,74801845 |
| m | 0 | 0          | 1,57079633 | 5,08434362 | 25,85055 | 11,5996552 | 134,552 | 0,4626421  | 0,52351044 | 0,74310976 |
| m | 0 | 0          | 1,57079633 | 5,08434362 | 25,85055 | 11,5996552 | 134,552 | 0,4626421  | 0,52351044 | 0,74310976 |
| m | 0 | 0          | 1,57079633 | 5,08434362 | 25,85055 | 11,5996552 | 134,552 | 0,4626421  | 0,52351044 | 0,74310976 |
| m | 0 | 0          | 1,57079633 | 5,98026254 | 35,76354 | 11,3577727 | 128,999 | 0,49860316 | 0,52452643 | 0,71886893 |
| m | 0 | 0          | 1,57079633 | 5,60575954 | 31,42454 | 9,98563969 | 99,713  | 0,65455491 | 0,50595707 | 0,61431597 |
| m | 0 | 0          | 1,57079633 | 4,91282505 | 24,13585 | 11,4085933 | 130,156 | 0,4906754  | 0,52470289 | 0,7263357  |

|   |   |            |            |            |          |            |         |            |            |            |
|---|---|------------|------------|------------|----------|------------|---------|------------|------------|------------|
| m | 0 | 0          | 1,57079633 | 5,12522975 | 26,26798 | 11,4709633 | 131,583 | 0,44958788 | 0,55139371 | 0,74185043 |
| m | 0 | 0,35374161 | 1,21705472 | 4,51209264 | 20,35898 | 11,6978203 | 136,839 | 0,41119583 | 0,54984532 | 0,7605198  |
| m | 0 | 0,17408301 | 1,39671332 | 4,73384727 | 22,40931 | 10,3843151 | 107,834 | 0,61960783 | 0,51074871 | 0,64232841 |
| m | 0 | 0          | 1,57079633 | 4,78403073 | 22,88695 | 11,5626986 | 133,696 | 0,42496908 | 0,55779357 | 0,75494564 |
| m | 0 | 0          | 1,57079633 | 4,63211831 | 21,45652 | 11,567195  | 133,8   | 0,45634473 | 0,53290196 | 0,74286719 |
| m | 0 | 0          | 1,57079633 | 4,63211831 | 21,45652 | 11,567195  | 133,8   | 0,45634473 | 0,53290196 | 0,74286719 |
| m | 0 | 0          | 1,57079633 | 4,63211831 | 21,45652 | 11,567195  | 133,8   | 0,45634473 | 0,53290196 | 0,74286719 |
| m | 0 | 0,22551341 | 1,34528292 | 4,48230967 | 20,0911  | 10,9436283 | 119,763 | 0,52653069 | 0,55166483 | 0,6904921  |
| m | 0 | 0,22551341 | 1,34528292 | 5,54676212 | 30,76657 | 9,61597629 | 92,467  | 0,67703996 | 0,51575694 | 0,59295887 |
| m | 0 | 0,28675655 | 1,28403977 | 4,8380895  | 23,40711 | 11,0505203 | 122,114 | 0,52582749 | 0,53834685 | 0,69656994 |
| m | 0 | 0,22551341 | 1,34528292 | 3,58802313 | 12,87391 | 12,1328892 | 147,207 | 0,26795543 | 0,55830927 | 0,84984738 |
| m | 0 | 0,73531445 | 0,83548187 | 4,69604727 | 22,05286 | 12,2554886 | 150,197 | 0,40733576 | 0,4819786  | 0,77006266 |
| m | 0 | 0,39769942 | 1,17309691 | 4,24566367 | 18,02566 | 12,0143664 | 144,345 | 0,31065914 | 0,55656211 | 0,83275664 |
| m | 0 | 0          | 1,57079633 | 5,95503065 | 35,46239 | 11,7841843 | 138,867 | 0,38417926 | 0,55634505 | 0,77390945 |
| m | 0 | 0,17408301 | 1,39671332 | 2,70501941 | 7,31713  | 11,9579262 | 142,992 | 0,32955924 | 0,56503284 | 0,79598345 |
| m | 0 | 0,17408301 | 1,39671332 | 2,70501941 | 7,31713  | 11,9579262 | 142,992 | 0,32955924 | 0,56503284 | 0,79598345 |
| m | 0 | 0,17408301 | 1,39671332 | 2,70501941 | 7,31713  | 11,9579262 | 142,992 | 0,32955924 | 0,56503284 | 0,79598345 |
| m | 0 | 0,20135792 | 1,36943841 | 5,0242084  | 25,24267 | 11,3579488 | 129,003 | 0,50838895 | 0,51617557 | 0,70435912 |
| m | 0 | 0,26776333 | 1,303033   | 4,55790193 | 20,77447 | 11,6076699 | 134,738 | 0,49403438 | 0,4974836  | 0,72273969 |
| m | 0 | 0,87589139 | 0,69490494 | 4,99314831 | 24,93153 | 12,5716745 | 158,047 | 0,32450413 | 0,48779791 | 0,80681751 |
| m | 0 | 0,36886298 | 1,20193334 | 4,87216584 | 23,738   | 12,6900355 | 161,037 | 0,26835387 | 0,47757359 | 0,86825689 |
| m | 0 | 0,54640056 | 1,02439576 | 4,40019545 | 19,36172 | 13,363308  | 178,578 | 0,22822475 | 0,40517893 | 0,86935372 |
| m | 0 | 0,92729522 | 0,64350111 | 4,90455401 | 24,05465 | 12,7995703 | 163,829 | 0,29290385 | 0,45731587 | 0,85073444 |
| m | 0 | 0,65388706 | 0,91690926 | 3,78954483 | 14,36065 | 13,2846152 | 176,481 | 0,22194253 | 0,38585803 | 0,92240908 |
| m | 0 | 0,61193971 | 0,95885661 | 4,32745768 | 18,72689 | 12,8381463 | 164,818 | 0,24666228 | 0,46582431 | 0,87368959 |
| m | 0 | 0,61193971 | 0,95885661 | 4,32745768 | 18,72689 | 12,8381463 | 164,818 | 0,24666228 | 0,46582431 | 0,87368959 |
| m | 0 | 0,61193971 | 0,95885661 | 4,32745768 | 18,72689 | 12,8381463 | 164,818 | 0,24666228 | 0,46582431 | 0,87368959 |
| m | 0 | 0,35374161 | 1,21705472 | 3,37710675 | 11,40485 | 13,0926697 | 171,418 | 0,23289673 | 0,40925627 | 0,92356081 |
| m | 0 | 0,54640056 | 1,02439576 | 4,54288455 | 20,6378  | 12,8866986 | 166,067 | 0,23492541 | 0,4630018  | 0,87769799 |

|   |            |            |            |            |          |            |         |            |            |            |
|---|------------|------------|------------|------------|----------|------------|---------|------------|------------|------------|
| m | 0          | 0,41151685 | 1,15927948 | 4,34576115 | 18,88564 | 12,7597414 | 162,811 | 0,31758768 | 0,44949411 | 0,84758839 |
| m | 0          | 0,47603382 | 1,09476251 | 3,65979098 | 13,39407 | 13,1706492 | 173,466 | 0,22903768 | 0,42699135 | 0,87744673 |
| m | 0          | 0,41151685 | 1,15927948 | 4,98745426 | 24,8747  | 12,9297718 | 167,179 | 0,46401526 | 0,39318334 | 0,66767141 |
| m | 0          | 0,41151685 | 1,15927948 | 3,52937388 | 12,45648 | 13,1961737 | 174,139 | 0,23010881 | 0,42099813 | 0,88141094 |
| m | 0          | 0,46364761 | 1,10714872 | 3,78095094 | 14,29559 | 13,3460856 | 178,118 | 0,20056173 | 0,41084254 | 0,88471681 |
| m | 0          | 0,33806525 | 1,23273107 | 4,12572781 | 17,02163 | 13,2212329 | 174,801 | 0,22825497 | 0,41981211 | 0,87799688 |
| m | 0          | 0,33806525 | 1,23273107 | 4,12572781 | 17,02163 | 13,2212329 | 174,801 | 0,22825497 | 0,41981211 | 0,87799688 |
| m | 0          | 0,33806525 | 1,23273107 | 4,12572781 | 17,02163 | 13,2212329 | 174,801 | 0,22825497 | 0,41981211 | 0,87799688 |
| m | 0          | 0,41151685 | 1,15927948 | 4,04237059 | 16,34076 | 13,0387883 | 170,01  | 0,34216513 | 0,42478402 | 0,79293095 |
| m | 0          | 0,33806525 | 1,23273107 | 4,7917909  | 22,96126 | 11,6849048 | 136,537 | 0,56180403 | 0,42938521 | 0,66016106 |
| m | 0          | 0,17408301 | 1,39671332 | 3,65979098 | 13,39407 | 12,9208359 | 166,948 | 0,42359836 | 0,40598421 | 0,72491587 |
| m | 0          | 0,39769942 | 1,17309691 | 4,59800174 | 21,14162 | 12,7319284 | 162,102 | 0,46198604 | 0,40975362 | 0,68830205 |
| m | 0          | 0,6847192  | 0,88607712 | 4,82022925 | 23,23461 | 12,8219733 | 164,403 | 0,42189329 | 0,42349307 | 0,70671906 |
| m | 0,22551341 | 0,51197269 | 1,00212082 | 4,1260429  | 17,02423 | 13,5091451 | 182,497 | 0,36409922 | 0,38873226 | 0,71742942 |
| m | 0          | 0,50017961 | 1,07061672 | 5,11190375 | 26,13156 | 11,9496862 | 142,795 | 0,54882635 | 0,42034652 | 0,63404561 |
| m | 0          | 0,47603382 | 1,09476251 | 5,02990159 | 25,29991 | 12,4154742 | 154,144 | 0,49016094 | 0,42410359 | 0,66536451 |
| m | 0          | 0,47603382 | 1,09476251 | 5,02990159 | 25,29991 | 12,4154742 | 154,144 | 0,49016094 | 0,42410359 | 0,66536451 |
| m | 0          | 0,47603382 | 1,09476251 | 5,02990159 | 25,29991 | 12,4154742 | 154,144 | 0,49016094 | 0,42410359 | 0,66536451 |
| m | 0          | 0,39769942 | 1,17309691 | 4,92554058 | 24,26095 | 13,8295698 | 191,257 | 0,27008965 | 0,39373984 | 0,75123288 |
| m | 0          | 0,67449093 | 0,8963054  | 4,95970967 | 24,59872 | 12,4501807 | 155,007 | 0,50238794 | 0,40168741 | 0,67833162 |
| m | 0          | 0,52359878 | 1,04719755 | 4,82759567 | 23,30568 | 12,7110975 | 161,572 | 0,4502578  | 0,42132258 | 0,68524497 |
| m | 0          | 0,55759883 | 1,0131975  | 4,80603059 | 23,09793 | 13,1037018 | 171,707 | 0,35170142 | 0,4337973  | 0,73767152 |
| m | 1,20193334 | 0          | 0,36886298 | 5,40816697 | 29,24827 | 15,1643991 | 229,959 | 0,25743249 | 0,32362421 | 0,66792098 |
| m | 0          | 0,50017961 | 1,07061672 | 4,26564298 | 18,19571 | 13,0569522 | 170,484 | 0,38656275 | 0,42417664 | 0,71193989 |
| m | 0          | 0,28675655 | 1,28403977 | 4,26241598 | 18,16819 | 12,1920876 | 148,647 | 0,52104785 | 0,42120158 | 0,64244891 |
| m | 0          | 0,47603382 | 1,09476251 | 4,89930913 | 24,00323 | 12,5962296 | 158,665 | 0,51456319 | 0,39930749 | 0,61112378 |
| m | 0          | 0,47603382 | 1,09476251 | 4,89930913 | 24,00323 | 12,5962296 | 158,665 | 0,51456319 | 0,39930749 | 0,61112378 |
| m | 0          | 0,47603382 | 1,09476251 | 4,89930913 | 24,00323 | 12,5962296 | 158,665 | 0,51456319 | 0,39930749 | 0,61112378 |
| m | 1,34528292 | 0          | 0,22551341 | 5,28757884 | 27,95849 | 14,8434497 | 220,328 | 0,28837911 | 0,33471057 | 0,67134855 |

|   |            |            |            |            |          |            |         |            |            |            |
|---|------------|------------|------------|------------|----------|------------|---------|------------|------------|------------|
| m | 0,79539883 | 0,17408301 | 0,74535537 | 4,91012423 | 24,10932 | 15,2305286 | 231,969 | 0,38427522 | 0,3262157  | 0,57137521 |
| m | 0,59050002 | 0,22551341 | 0,92729522 | 5,20128446 | 27,05336 | 14,1869658 | 201,27  | 0,41724396 | 0,34834793 | 0,60938904 |
| m | 1,303033   | 0          | 0,26776333 | 5,32577788 | 28,36391 | 14,4890648 | 209,933 | 0,26337676 | 0,35708206 | 0,70658996 |
| m | 0          | 0,42498878 | 1,14580754 | 4,91282505 | 24,13585 | 13,7224998 | 188,307 | 0,26681896 | 0,30738972 | 0,90150441 |
| m | 1,14580754 | 0          | 0,42498878 | 4,48230967 | 20,0911  | 13,5387222 | 183,297 | 0,40965277 | 0,3792212  | 0,66810555 |
| m | 0,61193971 | 0,50017961 | 0,72525322 | 5,4502899  | 29,70566 | 14,2871271 | 204,122 | 0,40172812 | 0,32721222 | 0,64037094 |
| m | 0          | 0,52359878 | 1,04719755 | 3,74591511 | 14,03188 | 14,322814  | 205,143 | 0,42521862 | 0,30799941 | 0,63166393 |
| m | 0          | 0,52359878 | 1,04719755 | 3,74591511 | 14,03188 | 14,322814  | 205,143 | 0,42521862 | 0,30799941 | 0,63166393 |
| m | 0          | 0,52359878 | 1,04719755 | 3,74591511 | 14,03188 | 14,322814  | 205,143 | 0,42521862 | 0,30799941 | 0,63166393 |
| m | 0          | 0,36886298 | 1,20193334 | 5,57830888 | 31,11753 | 14,6196443 | 213,734 | 0,22836889 | 0,26836058 | 0,80057619 |
| m | 0          | 0,41151685 | 1,15927948 | 5,59042217 | 31,25282 | 14,5544495 | 211,832 | 0,24800317 | 0,26318401 | 0,8034719  |
| m | 0          | 0,42498878 | 1,14580754 | 4,85853785 | 23,60539 | 14,0665561 | 197,868 | 0,15362807 | 0,30014583 | 0,90594386 |
| m | 0          | 0,39769942 | 1,17309691 | 4,55109657 | 20,71248 | 14,059623  | 197,673 | 0          | 0,32849756 | 0,91388781 |
| m | 0          | 0,20135792 | 1,36943841 | 3,74841833 | 14,05064 | 13,844349  | 191,666 | 0          | 0,3245162  | 0,96549015 |
| m | 0          | 0,20135792 | 1,36943841 | 5,06251222 | 25,62903 | 13,7650282 | 189,476 | 0,21402628 | 0,31401969 | 0,92557597 |
| m | 0          | 0,45102681 | 1,11976951 | 4,88251779 | 23,83898 | 14,0091399 | 196,256 | 0          | 0,33485203 | 0,91569716 |
| m | 0          | 0,33806525 | 1,23273107 | 4,5243983  | 20,47018 | 13,8995683 | 193,198 | 0          | 0,34439395 | 0,92740699 |
| m | 0          | 0,33806525 | 1,23273107 | 4,5243983  | 20,47018 | 13,8995683 | 193,198 | 0          | 0,34439395 | 0,92740699 |
| m | 0          | 0,33806525 | 1,23273107 | 4,5243983  | 20,47018 | 13,8995683 | 193,198 | 0          | 0,34439395 | 0,92740699 |
| m | 0          | 0,22551341 | 1,34528292 | 4,77322951 | 22,78372 | 13,7754492 | 189,763 | 0          | 0,33282446 | 0,97080483 |
| m | 0          | 0,20135792 | 1,36943841 | 3,88819495 | 15,11806 | 13,7260701 | 188,405 | 0          | 0,30784497 | 1,0159863  |
| m | 0          | 0,22551341 | 1,34528292 | 4,40019545 | 19,36172 | 13,6915302 | 187,458 | 0          | 0,34388104 | 0,97525072 |
| m | 0          | 0,63305184 | 0,93774449 | 4,21084315 | 17,7312  | 15,1546363 | 229,663 | 0,18170138 | 0,23879373 | 0,76963735 |
| m | 0          | 0,36886298 | 1,20193334 | 4,10390546 | 16,84204 | 13,8191896 | 190,97  | 0,451306   | 0,32844467 | 0,64671271 |
| m | 0          | 0,60126422 | 0,96953211 | 5,31885984 | 28,29027 | 15,0680457 | 227,046 | 0,26146294 | 0,22519098 | 0,74996812 |
| m | 0          | 0,54640056 | 1,02439576 | 5,92665673 | 35,12526 | 14,991631  | 224,749 | 0,29266659 | 0,26956213 | 0,70607099 |
| m | 0          | 0,55759883 | 1,0131975  | 5,5790017  | 31,12526 | 14,6175579 | 213,673 | 0,23383166 | 0,25632018 | 0,8088808  |
| m | 0          | 0,52359878 | 1,04719755 | 6,3175644  | 39,91162 | 14,9851593 | 224,555 | 0,27272349 | 0,22474065 | 0,75458406 |
| m | 0          | 0,52359878 | 1,04719755 | 6,3175644  | 39,91162 | 14,9851593 | 224,555 | 0,27272349 | 0,22474065 | 0,75458406 |

|   |            |            |            |            |          |            |         |            |            |            |
|---|------------|------------|------------|------------|----------|------------|---------|------------|------------|------------|
| m | 0          | 0,52359878 | 1,04719755 | 6,3175644  | 39,91162 | 14,9851593 | 224,555 | 0,27272349 | 0,22474065 | 0,75458406 |
| m | 0          | 0,28675655 | 1,28403977 | 6,05803186 | 36,69975 | 13,9476163 | 194,536 | 0,39193651 | 0,32281455 | 0,71033249 |
| m | 0          | 0,30469265 | 1,26610367 | 5,94140135 | 35,30025 | 14,0093897 | 196,263 | 0,38792358 | 0,32077803 | 0,7075983  |
| m | 0          | 0,10016742 | 1,47062891 | 4,5104124  | 20,34382 | 14,0789559 | 198,217 | 0,34729125 | 0,33898705 | 0,71821943 |
| m | 0          | 0,64350111 | 0,92729522 | 5,15053978 | 26,52806 | 13,5133268 | 182,61  | 0,43539469 | 0,36611039 | 0,65686488 |
| m | 0          | 0,26776333 | 1,303033   | 4,84144813 | 23,43962 | 14,0423645 | 197,188 | 0,41868239 | 0,31703502 | 0,6693175  |
| m | 0          | 0,28675655 | 1,28403977 | 4,78981315 | 22,94231 | 14,3173322 | 204,986 | 0,34565209 | 0,3313124  | 0,69373244 |
| m | 0          | 0,22551341 | 1,34528292 | 5,01478315 | 25,14805 | 13,9756932 | 195,32  | 0,38611794 | 0,33248378 | 0,70169363 |
| m | 0          | 0,73531445 | 0,83548187 | 4,83155772 | 23,34395 | 14,260014  | 203,348 | 0,37646144 | 0,3279844  | 0,67721126 |
| m | 0          | 0,73531445 | 0,83548187 | 4,83155772 | 23,34395 | 14,260014  | 203,348 | 0,37646144 | 0,3279844  | 0,67721126 |
| m | 0          | 0,73531445 | 0,83548187 | 4,83155772 | 23,34395 | 14,260014  | 203,348 | 0,37646144 | 0,3279844  | 0,67721126 |
| m | 0          | 0,45102681 | 1,11976951 | 5,66753562 | 32,12096 | 14,113327  | 199,186 | 0,40961663 | 0,32914411 | 0,65499184 |
| m | 0          | 0,52359878 | 1,04719755 | 5,04467343 | 25,44873 | 13,0334569 | 169,871 | 0,49360083 | 0,3628529  | 0,64816192 |
| m | 0          | 0,75538013 | 0,81541619 | 4,86903481 | 23,7075  | 14,2389606 | 202,748 | 0,27388507 | 0,36850111 | 0,71864585 |
| m | 0          | 0,79539883 | 0,7753975  | 5,55286052 | 30,83426 | 14,7152982 | 216,54  | 0,32625671 | 0,32832265 | 0,66096633 |
| m | 0          | 0,51197269 | 1,05882364 | 4,75874353 | 22,64564 | 14,1797391 | 201,065 | 0,30687818 | 0,37224483 | 0,69369206 |
| m | 0          | 0,64350111 | 0,92729522 | 4,51209264 | 20,35898 | 14,7728129 | 218,236 | 0,26769987 | 0,33232719 | 0,69545019 |
| m | 0,55759883 | 0,54640056 | 0,73531445 | 3,47939363 | 12,10618 | 15,3109438 | 234,425 | 0,29709275 | 0,3199784  | 0,63367859 |
| m | 1,28403977 | 0          | 0,28675655 | 3,77016047 | 14,21411 | 17,4793307 | 305,527 | 0,19696156 | 0,2866444  | 0,56797116 |
| m | 1,28403977 | 0          | 0,28675655 | 3,77016047 | 14,21411 | 17,4793307 | 305,527 | 0,19696156 | 0,2866444  | 0,56797116 |
| m | 1,28403977 | 0          | 0,28675655 | 3,77016047 | 14,21411 | 17,4793307 | 305,527 | 0,19696156 | 0,2866444  | 0,56797116 |
| m | 1,57079633 | 0          | 0          | 5,44328026 | 29,6293  | 13,799384  | 190,423 | 0,29862096 | 0,40041727 | 0,71778842 |
| m | 1,57079633 | 0          | 0          | 4,93732721 | 24,3772  | 14,2488947 | 203,031 | 0,2791954  | 0,37389669 | 0,70261943 |
| m | 0,36886298 | 0,72525322 | 0,71516746 | 4,66167245 | 21,73119 | 14,2987762 | 204,455 | 0,34506096 | 0,35391359 | 0,66576506 |
| m | 0          | 0,42498878 | 1,14580754 | 4,4428178  | 19,73863 | 13,960086  | 194,884 | 0,28094072 | 0,38365203 | 0,7329623  |
| m | 0,55759883 | 0,52359878 | 0,75538013 | 4,59946953 | 21,15512 | 14,3832542 | 206,878 | 0,26700982 | 0,36197568 | 0,71120519 |
| m | 0          | 0,71516746 | 0,85562887 | 4,43900101 | 19,70473 | 14,1503357 | 200,232 | 0,30804946 | 0,36449047 | 0,70805256 |
| m | 0          | 0,67449093 | 0,8963054  | 5,01805241 | 25,18085 | 13,6330114 | 185,859 | 0,35032119 | 0,38667371 | 0,7166125  |
| m | 0          | 0,5686755  | 1,00212082 | 4,68897537 | 21,98649 | 13,6349551 | 185,912 | 0,30011028 | 0,38802938 | 0,76881312 |

|   |            |            |            |            |          |            |         |            |            |            |
|---|------------|------------|------------|------------|----------|------------|---------|------------|------------|------------|
| m | 0          | 0,5686755  | 1,00212082 | 4,68897537 | 21,98649 | 13,6349551 | 185,912 | 0,30011028 | 0,38802938 | 0,76881312 |
| m | 0          | 0,5686755  | 1,00212082 | 4,68897537 | 21,98649 | 13,6349551 | 185,912 | 0,30011028 | 0,38802938 | 0,76881312 |
| m | 0          | 0,45102681 | 1,11976951 | 4,61305647 | 21,28029 | 13,4724905 | 181,508 | 0,32294067 | 0,402927   | 0,75101146 |
| m | 0          | 0,50017961 | 1,07061672 | 3,49460155 | 12,21224 | 13,4655486 | 181,321 | 0,28884629 | 0,41955103 | 0,75890437 |
| m | 0,17408301 | 0,36886298 | 1,15927948 | 4,62660459 | 21,40547 | 13,1836641 | 173,809 | 0,32191169 | 0,42505547 | 0,77702247 |
| m | 0          | 0,41151685 | 1,15927948 | 4,82106316 | 23,24265 | 13,4111148 | 179,858 | 0,20967516 | 0,37046956 | 0,92589818 |
| m | 0          | 0,59050002 | 0,98029631 | 4,78794946 | 22,92446 | 13,0412039 | 170,073 | 0,41503195 | 0,40713572 | 0,7081729  |
| m | 0,47603382 | 0,51197269 | 0,83548187 | 5,17572604 | 26,78814 | 13,8094895 | 190,702 | 0,20013412 | 0,35909134 | 0,85801245 |
| m | 0          | 0,55759883 | 1,0131975  | 4,75169128 | 22,57857 | 13,335404  | 177,833 | 0,29339505 | 0,41831869 | 0,78738497 |
| m | 0          | 0,35374161 | 1,21705472 | 4,55790193 | 20,77447 | 13,2420165 | 175,351 | 0,40906764 | 0,38470275 | 0,71867006 |
| m | 0          | 0,35374161 | 1,21705472 | 4,55790193 | 20,77447 | 13,2420165 | 175,351 | 0,40906764 | 0,38470275 | 0,71867006 |
| m | 0          | 0,35374161 | 1,21705472 | 4,55790193 | 20,77447 | 13,2420165 | 175,351 | 0,40906764 | 0,38470275 | 0,71867006 |
| m | 0          | 0,45102681 | 1,11976951 | 3,82415219 | 14,62414 | 13,397649  | 179,497 | 0,21865257 | 0,39636488 | 0,88267059 |
| m | 0          | 0,51197269 | 1,05882364 | 4,66167245 | 21,73119 | 13,205832  | 174,394 | 0,24315281 | 0,41325678 | 0,88038997 |
| m | 0          | 0,51197269 | 1,05882364 | 4,9599748  | 24,60135 | 13,7088293 | 187,932 | 0,19771078 | 0,37236775 | 0,8605676  |
| m | 0          | 0,22551341 | 1,34528292 | 3,54357729 | 12,55694 | 10,114544  | 102,304 | 0,63275085 | 0,51230897 | 0,60498995 |
| m | 0          | 0,61193971 | 0,95885661 | 4,23620703 | 17,94545 | 13,3685078 | 178,717 | 0,19772924 | 0,37840775 | 0,93225581 |
| m | 0          | 0,51197269 | 1,05882364 | 4,66885318 | 21,79819 | 13,6616983 | 186,642 | 0,19217891 | 0,34190182 | 0,92505261 |
| m | 0          | 0,46364761 | 1,10714872 | 3,77981613 | 14,28701 | 13,2285676 | 174,995 | 0,23885871 | 0,41636655 | 0,87459684 |
| m | 0          | 0,55759883 | 1,0131975  | 4,75248041 | 22,58607 | 13,9709699 | 195,188 | 0,18486781 | 0,3452469  | 0,85590985 |
| m | 0          | 0,55759883 | 1,0131975  | 4,75248041 | 22,58607 | 13,9709699 | 195,188 | 0,18486781 | 0,3452469  | 0,85590985 |
| m | 0          | 0,55759883 | 1,0131975  | 4,75248041 | 22,58607 | 13,9709699 | 195,188 | 0,18486781 | 0,3452469  | 0,85590985 |
| m | 0          | 0,51197269 | 1,05882364 | 4,41127079 | 19,45931 | 13,1362476 | 172,561 | 0,20790061 | 0,43708832 | 0,88545054 |
| m | 0          | 0,28675655 | 1,28403977 | 5,16250521 | 26,65146 | 12,8782375 | 165,849 | 0,3239907  | 0,45251512 | 0,80342507 |
| m | 0          | 0          | 1,57079633 | 5,22827218 | 27,33483 | 11,8833497 | 141,214 | 0,47657141 | 0,4805119  | 0,72988468 |
| m | 0          | 0          | 1,57079633 | 4,61225867 | 21,27293 | 12,1217573 | 146,937 | 0,33868624 | 0,53636402 | 0,80447399 |
| m | 0          | 0,28675655 | 1,28403977 | 4,10878449 | 16,88211 | 12,5639166 | 157,852 | 0,31762301 | 0,49254879 | 0,81195835 |
| m | 0          | 0,50017961 | 1,07061672 | 3,78210788 | 14,30434 | 12,9810246 | 168,507 | 0,1999862  | 0,43168174 | 0,9400671  |
| m | 0          | 0,17408301 | 1,39671332 | 3,81937168 | 14,5876  | 13,0571436 | 170,489 | 0,15334016 | 0,43200085 | 0,94959048 |

|   |   |            |            |            |          |            |         |            |            |            |
|---|---|------------|------------|------------|----------|------------|---------|------------|------------|------------|
| m | 0 | 0,26776333 | 1,303033   | 3,64280798 | 13,27005 | 12,241977  | 149,866 | 0,35797916 | 0,51120316 | 0,79724437 |
| m | 0 | 0,26776333 | 1,303033   | 3,64280798 | 13,27005 | 12,241977  | 149,866 | 0,35797916 | 0,51120316 | 0,79724437 |
| m | 0 | 0,26776333 | 1,303033   | 3,64280798 | 13,27005 | 12,241977  | 149,866 | 0,35797916 | 0,51120316 | 0,79724437 |
| m | 0 | 0          | 1,57079633 | 4,88690904 | 23,88188 | 12,3447155 | 152,392 | 0,2751265  | 0,52346909 | 0,85821024 |
| m | 0 | 0,22551341 | 1,34528292 | 3,96960074 | 15,75773 | 12,2725303 | 150,615 | 0,29947397 | 0,52352718 | 0,84917275 |
| m | 0 | 0          | 1,57079633 | 4,89711752 | 23,98176 | 12,1517488 | 147,665 | 0,35342792 | 0,52478223 | 0,79823827 |
| m | 0 | 0          | 1,57079633 | 3,93902272 | 15,5159  | 12,2468772 | 149,986 | 0,34627198 | 0,51557442 | 0,80640234 |
| m | 0 | 0          | 1,57079633 | 3,76388098 | 14,1668  | 12,0906576 | 146,184 | 0,36186364 | 0,52802285 | 0,79445456 |
| m | 0 | 0,10016742 | 1,47062891 | 3,96157292 | 15,69406 | 11,8490928 | 140,401 | 0,32612048 | 0,57220807 | 0,82037077 |
| m | 0 | 0          | 1,57079633 | 3,9923602  | 15,93894 | 12,0959497 | 146,312 | 0,31331315 | 0,54180717 | 0,84084131 |
| m | 0 | 0          | 1,57079633 | 5,16302431 | 26,65682 | 12,2160141 | 149,231 | 0,27663298 | 0,52559757 | 0,88697064 |
| m | 0 | 0          | 1,57079633 | 5,16302431 | 26,65682 | 12,2160141 | 149,231 | 0,27663298 | 0,52559757 | 0,88697064 |
| m | 0 | 0          | 1,57079633 | 5,16302431 | 26,65682 | 12,2160141 | 149,231 | 0,27663298 | 0,52559757 | 0,88697064 |
| m | 0 | 0          | 1,57079633 | 4,36765383 | 19,0764  | 12,1657306 | 148,005 | 0,35100946 | 0,52332715 | 0,80385525 |
| m | 0 | 0          | 1,57079633 | 3,83499804 | 14,70721 | 12,517348  | 156,684 | 0,28180134 | 0,49348122 | 0,86918748 |
| m | 0 | 0          | 1,57079633 | 3,96387058 | 15,71227 | 12,3605421 | 152,783 | 0,30316866 | 0,5068936  | 0,85807774 |
| m | 0 | 0          | 1,57079633 | 4,55946378 | 20,78871 | 12,6053163 | 158,894 | 0,30572164 | 0,46940376 | 0,86534802 |
| m | 0 | 0          | 1,57079633 | 4,56935335 | 20,87899 | 12,459374  | 155,236 | 0,31107189 | 0,48851118 | 0,85897411 |
| m | 0 | 0          | 1,57079633 | 4,92977079 | 24,30264 | 11,8925607 | 141,433 | 0,45672103 | 0,49165605 | 0,75115881 |
| m | 0 | 0          | 1,57079633 | 3,85208126 | 14,83853 | 12,3580338 | 152,721 | 0,38406326 | 0,48188741 | 0,78823158 |
| m | 0 | 0          | 1,57079633 | 4,86489363 | 23,66719 | 12,090244  | 146,174 | 0,42227621 | 0,49001947 | 0,77367689 |
| m | 0 | 0          | 1,57079633 | 4,86489363 | 23,66719 | 12,090244  | 146,174 | 0,42227621 | 0,49001947 | 0,77367689 |
| m | 0 | 0          | 1,57079633 | 4,86489363 | 23,66719 | 12,090244  | 146,174 | 0,42227621 | 0,49001947 | 0,77367689 |
| m | 0 | 0          | 1,57079633 | 4,28544747 | 18,36506 | 12,1112345 | 146,682 | 0,42948507 | 0,48176066 | 0,77255955 |
| m | 0 | 0          | 1,57079633 | 4,9531495  | 24,53369 | 12,3800646 | 153,266 | 0,35934551 | 0,49037363 | 0,80520094 |
| m | 0 | 0          | 1,57079633 | 5,44925683 | 29,6944  | 12,5190255 | 156,726 | 0,30467569 | 0,46535056 | 0,89438844 |
| m | 0 | 0          | 1,57079633 | 4,97160839 | 24,71689 | 12,4474495 | 154,939 | 0,41168607 | 0,45188501 | 0,78005126 |
| m | 0 | 0          | 1,57079633 | 4,03655918 | 16,29381 | 12,6371278 | 159,697 | 0,27824408 | 0,4591831  | 0,90908994 |
| m | 0 | 0          | 1,57079633 | 5,04196291 | 25,42139 | 11,9297108 | 142,318 | 0,47293027 | 0,47543279 | 0,74291848 |



|   |   |            |            |            |          |            |         |            |            |            |
|---|---|------------|------------|------------|----------|------------|---------|------------|------------|------------|
| m | 0 | 0          | 1,57079633 | 4,32093971 | 18,67052 | 12,294755  | 151,161 | 0,3796043  | 0,4901247  | 0,79600016 |
| m | 0 | 0          | 1,57079633 | 5,62868724 | 31,68212 | 11,4723145 | 131,614 | 0,50909348 | 0,50126314 | 0,7145276  |
| m | 0 | 0          | 1,57079633 | 5,62868724 | 31,68212 | 11,4723145 | 131,614 | 0,50909348 | 0,50126314 | 0,7145276  |
| m | 0 | 0          | 1,57079633 | 5,62868724 | 31,68212 | 11,4723145 | 131,614 | 0,50909348 | 0,50126314 | 0,7145276  |
| m | 0 | 0          | 1,57079633 | 6,3594245  | 40,44228 | 11,7664353 | 138,449 | 0,50653067 | 0,46736018 | 0,72311602 |
| m | 0 | 0          | 1,57079633 | 5,25515271 | 27,61663 | 11,8838546 | 141,226 | 0,49621434 | 0,45963989 | 0,73617218 |
| m | 0 | 0          | 1,57079633 | 5,09979411 | 26,0079  | 12,1234071 | 146,977 | 0,41198704 | 0,40739046 | 0,67123829 |
| m | 0 | 0          | 1,57079633 | 4,12003155 | 16,97466 | 14,2627487 | 203,426 | 0,36506823 | 0,32117498 | 0,69273209 |
| m | 0 | 0          | 1,57079633 | 5,02839139 | 25,28472 | 12,2728155 | 150,622 | 0,45295073 | 0,41614509 | 0,71605781 |
| m | 0 | 0          | 1,57079633 | 4,99314831 | 24,93153 | 12,3720653 | 153,068 | 0,4902044  | 0,38532229 | 0,69948798 |
| m | 0 | 0          | 1,57079633 | 4,48230967 | 20,0911  | 12,4897958 | 155,995 | 0,4388488  | 0,34215675 | 0,68920711 |
| m | 0 | 0          | 1,57079633 | 4,48230967 | 20,0911  | 12,4897958 | 155,995 | 0,4388488  | 0,34215675 | 0,68920711 |
| m | 0 | 0          | 1,57079633 | 4,48230967 | 20,0911  | 12,4897958 | 155,995 | 0,4388488  | 0,34215675 | 0,68920711 |
| m | 0 | 0          | 1,57079633 | 5,83184619 | 34,01043 | 12,6715824 | 160,569 | 0,42513758 | 0,3293541  | 0,73209687 |
| m | 0 | 0,17408301 | 1,39671332 | 5,01309685 | 25,13114 | 12,7975388 | 163,777 | 0,37392596 | 0,31458243 | 0,66274031 |
| m | 0 | 0,10016742 | 1,47062891 | 5,43765023 | 29,56804 | 13,0965263 | 171,519 | 0,26884532 | 0,32930394 | 0,71089305 |
| m | 0 | 0          | 1,57079633 | 5,22936134 | 27,34622 | 13,0158749 | 169,413 | 0,32266361 | 0,38140477 | 0,89948289 |
| m | 0 | 0          | 1,57079633 | 4,13035229 | 17,05981 | 13,0218278 | 169,568 | 0,30142937 | 0,41391207 | 0,87045572 |
| m | 0 | 0          | 1,57079633 | 5,21600422 | 27,2067  | 12,7507647 | 162,582 | 0,38104325 | 0,43175949 | 0,8008081  |
| m | 0 | 0          | 1,57079633 | 5,84097338 | 34,11697 | 12,8879013 | 166,098 | 0,34014511 | 0,43367812 | 0,82138884 |
| m | 0 | 0          | 1,57079633 | 5,35037756 | 28,62654 | 13,4332051 | 180,451 | 0,28015069 | 0,33793803 | 0,91597848 |
| m | 0 | 0          | 1,57079633 | 5,35037756 | 28,62654 | 13,4332051 | 180,451 | 0,28015069 | 0,33793803 | 0,91597848 |
| m | 0 | 0          | 1,57079633 | 5,35037756 | 28,62654 | 13,4332051 | 180,451 | 0,28015069 | 0,33793803 | 0,91597848 |
| m | 0 | 0          | 1,57079633 | 4,11486573 | 16,93212 | 12,791677  | 163,627 | 0,35329178 | 0,39750782 | 0,88934163 |
| m | 0 | 0          | 1,57079633 | 5,26377621 | 27,70734 | 12,8830121 | 165,972 | 0,30746492 | 0,40589876 | 0,90822231 |
| m | 0 | 0          | 1,57079633 | 4,47460166 | 20,02206 | 12,6978345 | 161,235 | 0,37634647 | 0,43978195 | 0,80391309 |
| m | 0 | 0,10016742 | 1,47062891 | 5,71384634 | 32,64804 | 12,3548776 | 152,643 | 0,47398397 | 0,42343955 | 0,74580279 |
| m | 0 | 0,10016742 | 1,47062891 | 4,34847904 | 18,90927 | 13,0205223 | 169,534 | 0,30656762 | 0,38750017 | 0,90898309 |
| m | 0 | 0          | 1,57079633 | 4,77750772 | 22,82458 | 12,2451623 | 149,944 | 0,44999832 | 0,45171214 | 0,7644102  |

|   |   |            |            |            |          |            |         |            |            |            |
|---|---|------------|------------|------------|----------|------------|---------|------------|------------|------------|
| m | 0 | 0          | 1,57079633 | 5,60669778 | 31,43506 | 12,634912  | 159,641 | 0,3908156  | 0,44010855 | 0,79604567 |
| m | 0 | 0          | 1,57079633 | 3,94171536 | 15,53712 | 13,1338875 | 172,499 | 0,21675645 | 0,37396272 | 0,98630261 |
| m | 0 | 0          | 1,57079633 | 3,94171536 | 15,53712 | 13,1338875 | 172,499 | 0,21675645 | 0,37396272 | 0,98630261 |
| m | 0 | 0          | 1,57079633 | 3,94171536 | 15,53712 | 13,1338875 | 172,499 | 0,21675645 | 0,37396272 | 0,98630261 |
| m | 0 | 0          | 1,57079633 | 3,97555028 | 15,805   | 13,2534147 | 175,653 | 0,20584923 | 0,35792294 | 0,98937251 |
| m | 0 | 0          | 1,57079633 | 4,59638227 | 21,12673 | 13,3243386 | 177,538 | 0,27506617 | 0,35729788 | 0,91522228 |
| m | 0 | 0          | 1,57079633 | 3,83333536 | 14,69446 | 13,2480565 | 175,511 | 0,22778824 | 0,38158159 | 0,9382899  |
| m | 0 | 0,20135792 | 1,36943841 | 3,80197054 | 14,45498 | 13,2473771 | 175,493 | 0,23024749 | 0,38243224 | 0,93550765 |
| m | 0 | 0,28675655 | 1,28403977 | 4,10878449 | 16,88211 | 12,8489299 | 165,095 | 0,31707114 | 0,43356258 | 0,85731205 |
| m | 0 | 0          | 1,57079633 | 4,8844836  | 23,85818 | 13,2309108 | 175,057 | 0,24402946 | 0,38084449 | 0,92999047 |
| m | 0 | 0,17408301 | 1,39671332 | 4,38700923 | 19,24585 | 13,0680144 | 170,773 | 0,28550428 | 0,39205802 | 0,91210507 |
| m | 0 | 0,10016742 | 1,47062891 | 4,39354299 | 19,30322 | 12,9718541 | 168,269 | 0,25446342 | 0,41657428 | 0,92374428 |
| m | 0 | 0,10016742 | 1,47062891 | 4,39354299 | 19,30322 | 12,9718541 | 168,269 | 0,25446342 | 0,41657428 | 0,92374428 |
| m | 0 | 0,10016742 | 1,47062891 | 4,39354299 | 19,30322 | 12,9718541 | 168,269 | 0,25446342 | 0,41657428 | 0,92374428 |
| m | 0 | 0,39769942 | 1,17309691 | 5,11313896 | 26,14419 | 13,0466088 | 170,214 | 0,24490711 | 0,4094373  | 0,92589027 |
| m | 0 | 0,28675655 | 1,28403977 | 5,70855761 | 32,58763 | 11,6208433 | 135,044 | 0,52368133 | 0,47081928 | 0,70448304 |
| m | 0 | 0          | 1,57079633 | 5,96846044 | 35,62252 | 11,8289053 | 139,923 | 0,49829903 | 0,47046125 | 0,71294861 |
| m | 0 | 0,26776333 | 1,303033   | 5,33653914 | 28,47865 | 11,6447842 | 135,601 | 0,53136759 | 0,46041889 | 0,70199016 |
| m | 0 | 0,33806525 | 1,23273107 | 4,71994597 | 22,27789 | 13,5399409 | 183,33  | 0,20311606 | 0,38436312 | 0,88165646 |
| m | 0 | 0,22551341 | 1,34528292 | 5,04598751 | 25,46199 | 11,7297485 | 137,587 | 0,52859228 | 0,45247939 | 0,70863132 |
| m | 0 | 0,33806525 | 1,23273107 | 5,02990159 | 25,29991 | 12,4072156 | 153,939 | 0,41243735 | 0,45833938 | 0,77731831 |
| m | 0 | 0,33806525 | 1,23273107 | 4,69190899 | 22,01401 | 12,7736447 | 163,166 | 0,34790121 | 0,45241886 | 0,79938139 |
| m | 0 | 0,33806525 | 1,23273107 | 4,69190899 | 22,01401 | 12,7736447 | 163,166 | 0,34790121 | 0,45241886 | 0,79938139 |
| m | 0 | 0,33806525 | 1,23273107 | 4,69190899 | 22,01401 | 12,7736447 | 163,166 | 0,34790121 | 0,45241886 | 0,79938139 |
| m | 0 | 0,42498878 | 1,14580754 | 4,23683962 | 17,95081 | 13,2534147 | 175,653 | 0,22465435 | 0,39000564 | 0,92335325 |
| m | 0 | 0,50017961 | 1,07061672 | 4,62930988 | 21,43051 | 13,3846554 | 179,149 | 0,22684917 | 0,3970166  | 0,87923687 |
| m | 0 | 0,45102681 | 1,11976951 | 4,59638227 | 21,12673 | 13,4112266 | 179,861 | 0,25978568 | 0,38621825 | 0,86365396 |
| m | 0 | 0,30469265 | 1,26610367 | 5,107889   | 26,09053 | 13,4523976 | 180,967 | 0,21778305 | 0,38981692 | 0,8828983  |
| m | 0 | 0,55759883 | 1,0131975  | 4,4966532  | 20,21989 | 12,7366401 | 162,222 | 0,43938375 | 0,40529692 | 0,75327667 |

|   |            |            |            |            |          |            |         |            |            |            |
|---|------------|------------|------------|------------|----------|------------|---------|------------|------------|------------|
| m | 0          | 0,39769942 | 1,17309691 | 4,93974392 | 24,40107 | 13,4539214 | 181,008 | 0,20647325 | 0,36699415 | 0,92485008 |
| m | 0          | 0,96953211 | 0,60126422 | 4,42447059 | 19,57594 | 13,4674793 | 181,373 | 0,2036963  | 0,36739676 | 0,92334535 |
| m | 0          | 0,61193971 | 0,95885661 | 4,64699042 | 21,59452 | 14,2173486 | 202,133 | 0,18114218 | 0,32036757 | 0,84346218 |
| m | 0          | 0,61193971 | 0,95885661 | 4,64699042 | 21,59452 | 14,2173486 | 202,133 | 0,18114218 | 0,32036757 | 0,84346218 |
| m | 0          | 0,61193971 | 0,95885661 | 4,64699042 | 21,59452 | 14,2173486 | 202,133 | 0,18114218 | 0,32036757 | 0,84346218 |
| m | 0          | 0,61193971 | 0,95885661 | 4,16335201 | 17,3335  | 14,5995548 | 213,147 | 0,19952825 | 0,32905108 | 0,76040676 |
| m | 0          | 0,55759883 | 1,0131975  | 4,07536992 | 16,60864 | 13,8923    | 192,996 | 0,22274915 | 0,34438073 | 0,84832565 |
| m | 0          | 0,72525322 | 0,8455431  | 4,23089589 | 17,90048 | 13,523535  | 182,886 | 0,30957654 | 0,36045816 | 0,8255478  |
| m | 0,73531445 | 0,59050002 | 0,51197269 | 4,28367482 | 18,34987 | 13,6569762 | 186,513 | 0,29002572 | 0,3523501  | 0,82787845 |
| m | 0          | 0,6847192  | 0,88607712 | 5,15003981 | 26,52291 | 14,0044279 | 196,124 | 0,24907763 | 0,37096797 | 0,76777602 |
| m | 0          | 0,45102681 | 1,11976951 | 4,53482414 | 20,56463 | 13,0880862 | 171,298 | 0,23581148 | 0,40795299 | 0,92497834 |
| m | 0          | 0,69490494 | 0,87589139 | 4,21516785 | 17,76764 | 14,0475977 | 197,335 | 0,22557151 | 0,33212789 | 0,83037068 |
| m | 0          | 0,55759883 | 1,0131975  | 4,52691065 | 20,49292 | 14,0386965 | 197,085 | 0,23655268 | 0,36395014 | 0,78328416 |
| m | 0          | 0,55759883 | 1,0131975  | 4,52691065 | 20,49292 | 14,0386965 | 197,085 | 0,23655268 | 0,36395014 | 0,78328416 |
| m | 0          | 0,55759883 | 1,0131975  | 4,52691065 | 20,49292 | 14,0386965 | 197,085 | 0,23655268 | 0,36395014 | 0,78328416 |
| m | 0          | 0,46364761 | 1,10714872 | 5,17572604 | 26,78814 | 14,1530915 | 200,31  | 0,25055837 | 0,36271214 | 0,75448778 |
| m | 0          | 0,76539283 | 0,8054035  | 5,57533407 | 31,08435 | 14,1608969 | 200,531 | 0,29852521 | 0,34754271 | 0,73369065 |
| m | 0          | 0,67449093 | 0,8963054  | 5,29527336 | 28,03992 | 14,616087  | 213,63  | 0,23005002 | 0,33751116 | 0,72941195 |
| m | 0          | 0,64350111 | 0,92729522 | 5,60150337 | 31,37684 | 14,544621  | 211,546 | 0,23653944 | 0,33943433 | 0,73237494 |
| m | 0          | 0,46364761 | 1,10714872 | 5,25055902 | 27,56837 | 13,6189574 | 185,476 | 0,44007171 | 0,35836477 | 0,64594219 |
| m | 0          | 0,75538013 | 0,81541619 | 5,17572604 | 26,78814 | 14,072029  | 198,022 | 0,22836159 | 0,36973576 | 0,7737067  |
| m | 0          | 0,7753975  | 0,79539883 | 5,22671886 | 27,31859 | 13,1701177 | 173,452 | 0,30916944 | 0,40217766 | 0,84158454 |
| m | 0          | 0,50017961 | 1,07061672 | 5,01643399 | 25,16461 | 13,3524155 | 178,287 | 0,42183092 | 0,38011089 | 0,67935568 |
| m | 0          | 0,50017961 | 1,07061672 | 5,01643399 | 25,16461 | 13,3524155 | 178,287 | 0,42183092 | 0,38011089 | 0,67935568 |
| m | 0          | 0,50017961 | 1,07061672 | 5,01643399 | 25,16461 | 13,3524155 | 178,287 | 0,42183092 | 0,38011089 | 0,67935568 |
| m | 0          | 0,46364761 | 1,10714872 | 5,09979411 | 26,0079  | 14,1492049 | 200,2   | 0,30263532 | 0,36186138 | 0,71591262 |
| m | 0          | 0,61193971 | 0,95885661 | 4,56139452 | 20,80632 | 15,2111144 | 231,378 | 0,27796951 | 0,30715546 | 0,66410934 |
| m | 0          | 0,42498878 | 1,14580754 | 5,20377843 | 27,07931 | 14,0942187 | 198,647 | 0,31487355 | 0,36364115 | 0,70790692 |
| m | 0,60126422 | 0,8054035  | 0,41151685 | 4,76913409 | 22,74464 | 14,7344834 | 217,105 | 0,30269222 | 0,33445425 | 0,67145593 |

|   |            |            |            |            |          |            |         |            |            |            |
|---|------------|------------|------------|------------|----------|------------|---------|------------|------------|------------|
| m | 1,17309691 | 0,17408301 | 0,35374161 | 3,83333536 | 14,69446 | 12,8253655 | 164,49  | 0,46176633 | 0,40947742 | 0,66517239 |
| m | 0          | 0,35374161 | 1,21705472 | 4,58369938 | 21,0103  | 15,2346316 | 232,094 | 0,25186604 | 0,32309149 | 0,66467914 |
| m | 0,93774449 | 0,22551341 | 0,57963974 | 1,51399505 | 2,292181 | 14,6901668 | 215,801 | 0,31149806 | 0,33190705 | 0,67328486 |
| m | 0,96953211 | 0,26776333 | 0,52359878 | 4,30883163 | 18,56603 | 12,8758301 | 165,787 | 0,37026714 | 0,45047865 | 0,72633671 |
| m | 0,96953211 | 0,26776333 | 0,52359878 | 4,30883163 | 18,56603 | 12,8758301 | 165,787 | 0,37026714 | 0,45047865 | 0,72633671 |
| m | 0,96953211 | 0,26776333 | 0,52359878 | 4,30883163 | 18,56603 | 12,8758301 | 165,787 | 0,37026714 | 0,45047865 | 0,72633671 |
| m | 1,10714872 | 0,17408301 | 0,43814903 | 4,95970967 | 24,59872 | 13,7873855 | 190,092 | 0,32649297 | 0,39462069 | 0,70516782 |
| m | 1,20193334 | 0          | 0,36886298 | 4,92374451 | 24,24326 | 14,4117313 | 207,698 | 0,29565525 | 0,35548151 | 0,69832888 |
| m | 1,26610367 | 0          | 0,30469265 | 4,32716535 | 18,72436 | 15,4419558 | 238,454 | 0,1807015  | 0,29956683 | 0,69767623 |
| m | 1,02439576 | 0          | 0,54640056 | 5,30708018 | 28,1651  | 13,0005769 | 169,015 | 0,44007599 | 0,48791407 | 0,7891694  |
| m | 0          | 0,36886298 | 1,20193334 | 6,59280441 | 43,46507 | 14,2627487 | 203,426 | 0,36506823 | 0,39455236 | 0,91876374 |
| m | 0          | 0,42498878 | 1,14580754 | 4,74363047 | 22,50203 | 13,4754963 | 181,589 | 0,33440007 | 0,49799706 | 0,76137072 |
| m | 0,93774449 | 0,28675655 | 0,54640056 | 4,96787782 | 24,67981 | 13,8254476 | 191,143 | 0,34128702 | 0,44997202 | 0,74896383 |
| m | 0,79539883 | 0,46364761 | 0,5686755  | 5,18852098 | 26,92075 | 13,8795533 | 192,642 | 0,39864639 | 0,40778519 | 0,73586971 |
| m | 0,79539883 | 0,46364761 | 0,5686755  | 5,18852098 | 26,92075 | 13,8795533 | 192,642 | 0,39864639 | 0,40778519 | 0,73586971 |
| m | 0,79539883 | 0,46364761 | 0,5686755  | 5,18852098 | 26,92075 | 13,8795533 | 192,642 | 0,39864639 | 0,40778519 | 0,73586971 |
| m | 0          | 0,26776333 | 1,303033   | 4,72476984 | 22,32345 | 14,0068198 | 196,191 | 0,35850038 | 0,43403598 | 0,76137843 |
| m | 0          | 0,22551341 | 1,17309691 | 5,51078307 | 30,36873 | 14,6215594 | 213,79  | 0,35879687 | 0,41644319 | 0,7765358  |
| m | 0          | 0,33806525 | 1,23273107 | 5,51078307 | 30,36873 | 14,252719  | 203,14  | 0,34089431 | 0,43019253 | 0,80226526 |

| Label | tgrass      | tshell      | tsand       | tchla       | chla2    | tMGS        | mgs2    | tsilt       | tveryfine   | tfine       |
|-------|-------------|-------------|-------------|-------------|----------|-------------|---------|-------------|-------------|-------------|
| t     | 0,775397497 | 0,100167421 | 0,775397497 | 3,767024024 | 14,19047 | 13,02681849 | 169,698 | 0,32203095  | 0,493078289 | 0,683532953 |
| t     | 0,674490928 | 0           | 0,896305399 | 4,825671974 | 23,28711 | 15,56158732 | 242,163 | 0,22957298  | 0,357735013 | 0,62685893  |
| t     | 0,611939715 | 0           | 0,958856612 | 3,578369741 | 12,80473 | 13,03291986 | 169,857 | 0,308037591 | 0,500925155 | 0,68170507  |
| t     | 0,557598827 | 0           | 1,0131975   | 3,56805269  | 12,731   | 12,94445827 | 167,559 | 0,315669601 | 0,502906224 | 0,68893263  |
| t     | 0,653887062 | 0           | 0,916909265 | 3,436371633 | 11,80865 | 13,90877421 | 193,454 | 0,285013319 | 0,443668974 | 0,669343498 |
| t     | 0,735314453 | 0,225513406 | 0,775397497 | 3,359677068 | 11,28743 | 13,94058822 | 194,34  | 0,26991544  | 0,46046273  | 0,647656953 |
| t     | 0,735314453 | 0,225513406 | 0,775397497 | 3,359677068 | 11,28743 | 13,94058822 | 194,34  | 0,26991544  | 0,46046273  | 0,647656953 |
| t     | 0,735314453 | 0,225513406 | 0,775397497 | 3,359677068 | 11,28743 | 13,94058822 | 194,34  | 0,26991544  | 0,46046273  | 0,647656953 |

|   |             |             |             |             |          |             |         |             |             |             |
|---|-------------|-------------|-------------|-------------|----------|-------------|---------|-------------|-------------|-------------|
| t | 0,500179609 | 0,100167421 | 1,058823639 | 3,273415647 | 10,71525 | 15,50457997 | 240,392 | 0,270064763 | 0,362525199 | 0,60658635  |
| t | 0,267763327 | 0,225513406 | 1,217054721 | 3,656015591 | 13,36645 | 15,36479743 | 236,077 | 0,263025967 | 0,354371832 | 0,628738214 |
| t | 0,368862984 | 0,201357921 | 1,145807544 | 3,35346239  | 11,24571 | 14,38002086 | 206,785 | 0,210947787 | 0,36910957  | 0,75120171  |
| t | 0,611939715 | 0,511972688 | 0,715167456 | 4,255441223 | 18,10878 | 13,60209543 | 185,017 | 0,238274672 | 0,424567205 | 0,785410463 |
| t | 0,694904938 | 0,100167421 | 0,855628871 | 3,494167998 | 12,20921 | 13,91517158 | 193,632 | 0,22433077  | 0,393640332 | 0,786405264 |
| t | 0,611939715 | 0,225513406 | 0,896305399 | 3,320293662 | 11,02435 | 14,07437388 | 198,088 | 0,210530736 | 0,384206451 | 0,779887952 |
| t | 0,633051836 | 0,304692654 | 0,845543105 | 3,923015422 | 15,39005 | 14,0644232  | 197,808 | 0,214588027 | 0,396205226 | 0,765303154 |
| t | 0,500179609 | 0,304692654 | 0,96953211  | 3,481710786 | 12,12231 | 13,67051572 | 186,883 | 0,325568984 | 0,404777964 | 0,725585409 |
| t | 0,500179609 | 0,304692654 | 0,96953211  | 3,481710786 | 12,12231 | 13,67051572 | 186,883 | 0,325568984 | 0,404777964 | 0,725585409 |
| t | 0,500179609 | 0,304692654 | 0,96953211  | 3,481710786 | 12,12231 | 13,67051572 | 186,883 | 0,325568984 | 0,404777964 | 0,725585409 |
| t | 0           | 0,411516846 | 1,159279481 | 3,215621246 | 10,34022 | 14,47262934 | 209,457 | 0,197292891 | 0,369607535 | 0,74528565  |
| t | 0,100167421 | 0,338065255 | 1,217054721 | 3,232239162 | 10,44737 | 14,0338163  | 196,948 | 0,218078954 | 0,398277963 | 0,763151324 |
| t | 0,546400564 | 0,267763327 | 0,958856612 | 4,371579806 | 19,11071 | 14,9504515  | 223,516 | 0,246790008 | 0,382836151 | 0,650877797 |
| t | 0,79539883  | 0,100167421 | 0,765392826 | 3,249493807 | 10,55921 | 13,29454775 | 176,745 | 0,259376313 | 0,497837979 | 0,69119045  |
| t | 0,225513406 | 0,174083011 | 1,284039775 | 3,996104353 | 15,96885 | 16,34398972 | 267,126 | 0,220121351 | 0,331652475 | 0,589720078 |
| t | 0,546400564 | 0           | 1,024395763 | 4,535778875 | 20,57329 | 15,6505591  | 244,94  | 0,26279651  | 0,349519599 | 0,608646194 |
| t | 0,397699415 | 0           | 1,173096912 | 3,440982418 | 11,84036 | 15,08280478 | 227,491 | 0,273979683 | 0,376903189 | 0,628491799 |
| t | 0,424988783 | 0,100167421 | 1,119769515 | 3,14698157  | 9,903493 | 14,82902559 | 219,9   | 0,251518419 | 0,405553655 | 0,637375428 |
| t | 0,424988783 | 0,100167421 | 1,119769515 | 3,14698157  | 9,903493 | 14,82902559 | 219,9   | 0,251518419 | 0,405553655 | 0,637375428 |
| t | 0,424988783 | 0,100167421 | 1,119769515 | 3,14698157  | 9,903493 | 14,82902559 | 219,9   | 0,251518419 | 0,405553655 | 0,637375428 |
| t | 0,79539883  | 0,174083011 | 0,755380134 | 3,481710786 | 12,12231 | 12,91712042 | 166,852 | 0,280322801 | 0,519725524 | 0,697011756 |
| t | 1,047197551 | 0           | 0,523598776 | 3,47378468  | 12,06718 | 13,17736696 | 173,643 | 0,243680849 | 0,512279948 | 0,701175339 |
| t | 0,633051836 | 0,100167421 | 0,927295218 | 3,591645862 | 12,89992 | 13,45607669 | 181,066 | 0,273469492 | 0,480576181 | 0,682513254 |
| t | 1,058823639 | 0,201357921 | 0,463647609 | 2,85297599  | 8,139472 | 14,00871158 | 196,244 | 0,228086774 | 0,449570383 | 0,687606486 |
| t | 0,338065255 | 0           | 1,232731072 | 3,1879335   | 10,16292 | 13,60275707 | 185,035 | 0,274295022 | 0,472168197 | 0,67069492  |
| t | 0,424988783 | 0,100167421 | 1,132647296 | 3,009051346 | 9,05439  | 14,33799149 | 205,578 | 0,244473371 | 0,448377748 | 0,635458877 |
| t | 0           | 0           | 1,570796327 | 3,323141586 | 11,04327 | 14,01199486 | 196,336 | 0,340169272 | 0,426484824 | 0,626562106 |
| t | 0,765392826 | 0,100167421 | 0,79539883  | 3,230958062 | 10,43909 | 13,53380952 | 183,164 | 0,287489797 | 0,480899581 | 0,653934907 |
| t | 0,765392826 | 0,100167421 | 0,79539883  | 3,230958062 | 10,43909 | 13,53380952 | 183,164 | 0,287489797 | 0,480899581 | 0,653934907 |

|   |             |             |             |             |          |             |         |             |             |             |
|---|-------------|-------------|-------------|-------------|----------|-------------|---------|-------------|-------------|-------------|
| t | 0,765392826 | 0,100167421 | 0,79539883  | 3,230958062 | 10,43909 | 13,53380952 | 183,164 | 0,287489797 | 0,480899581 | 0,653934907 |
| t | 0,79539883  | 0           | 0,775397497 | 3,448757747 | 11,89393 | 13,61800279 | 185,45  | 0,231977834 | 0,476243579 | 0,700564329 |
| t | 0,643501109 | 0,286756552 | 0,845543105 | 2,920717549 | 8,530591 | 14,21165015 | 201,971 | 0,208274774 | 0,445702256 | 0,677883029 |
| t | 1,058823639 | 0           | 0,511972688 | 3,569855739 | 12,74387 | 13,44581719 | 180,79  | 0,230732671 | 0,482562449 | 0,720099301 |
| t | 1,058823639 | 0           | 0,511972688 | 2,62001145  | 6,86446  | 13,32719025 | 177,614 | 0,20318787  | 0,487384039 | 0,75400915  |
| t | 0,674490928 | 0           | 0,896305399 | 3,598878992 | 12,95193 | 12,81265    | 164,164 | 0,250849699 | 0,527567666 | 0,739188911 |
| t | 0,916909265 | 0           | 0,653887062 | 3,2414796   | 10,50719 | 13,23438703 | 175,149 | 0,228826358 | 0,497531647 | 0,734544534 |
| t | 0,368862984 | 0           | 1,201933343 | 1,894772546 | 3,590163 | 13,46406328 | 181,281 | 0,182546417 | 0,486610891 | 0,74277797  |
| t | 0,93774449  | 0           | 0,633051836 | 3,712779282 | 13,78473 | 12,58399777 | 158,357 | 0,245441004 | 0,54395139  | 0,771349515 |
| t | 0,93774449  | 0           | 0,633051836 | 3,712779282 | 13,78473 | 12,58399777 | 158,357 | 0,245441004 | 0,54395139  | 0,771349515 |
| t | 0,93774449  | 0           | 0,633051836 | 3,712779282 | 13,78473 | 12,58399777 | 158,357 | 0,245441004 | 0,54395139  | 0,771349515 |
| t | 0           | 0,174083011 | 1,396713316 | 3,003413724 | 9,020494 | 13,18548444 | 173,857 | 0,248798863 | 0,489543114 | 0,739808922 |
| t | 0,775397497 | 0           | 0,79539883  | 2,877493527 | 8,279969 | 13,11502955 | 172,004 | 0,20526777  | 0,508673    | 0,752551443 |
| t | 0,353741606 | 0,100167421 | 1,201933343 | 2,821066642 | 7,958417 | 13,54905901 | 183,577 | 0,211649588 | 0,466225511 | 0,744784317 |
| t | 0,338065255 | 0,100167421 | 1,217054721 | 3,116701622 | 9,713829 | 13,57759183 | 184,351 | 0,163939112 | 0,461893924 | 0,777101583 |
| t | 0,805403501 | 0           | 0,765392826 | 2,904183878 | 8,434284 | 13,26472766 | 175,953 | 0,186631216 | 0,496010579 | 0,761793697 |
| t | 0,735314453 | 0           | 0,835481874 | 2,537608323 | 6,439456 | 13,6337449  | 185,879 | 0,175136918 | 0,466686452 | 0,749384432 |
| t | 0           | 0           | 1,570796327 | 2,575019806 | 6,630727 | 13,29232861 | 176,686 | 0,207564031 | 0,490772238 | 0,750521288 |
| t | 0           | 0,174083011 | 1,396713316 | 2,68989944  | 7,235559 | 13,11987043 | 172,131 | 0,232499627 | 0,49821828  | 0,748793575 |
| t | 0           | 0,174083011 | 1,396713316 | 2,68989944  | 7,235559 | 13,11987043 | 172,131 | 0,232499627 | 0,49821828  | 0,748793575 |
| t | 0           | 0,174083011 | 1,396713316 | 2,68989944  | 7,235559 | 13,11987043 | 172,131 | 0,232499627 | 0,49821828  | 0,748793575 |
| t | 0,601264217 | 0,174083011 | 0,93774449  | 2,961722641 | 8,771801 | 13,82577303 | 191,152 | 0,189238947 | 0,442294582 | 0,750953927 |
| t | 0,523598776 | 0,174083011 | 1,0131975   | 3,113639992 | 9,694754 | 13,66250343 | 186,664 | 0,177514426 | 0,450265713 | 0,774119107 |
| t | 0,958856612 | 0           | 0,611939715 | 2,967423967 | 8,805605 | 13,15268034 | 172,993 | 0,179412158 | 0,498857652 | 0,787190767 |
| t | 0,601264217 | 0,201357921 | 0,927295218 | 3,072397923 | 9,439629 | 13,78071116 | 189,908 | 0,171697479 | 0,441304707 | 0,772809133 |
| t | 0,694904938 | 0,174083011 | 0,845543105 | 3,485324949 | 12,14749 | 13,23219559 | 175,091 | 0,189232397 | 0,487155262 | 0,78754987  |
| t | 0,835481874 | 0,100167421 | 0,725253222 | 3,030594661 | 9,184504 | 13,45213738 | 180,96  | 0,172022769 | 0,473683866 | 0,774909994 |
| t | 0,815416193 | 0,201357921 | 0,715167456 | 2,612162514 | 6,823393 | 13,98631474 | 195,617 | 0,158696703 | 0,437025218 | 0,746319089 |
| t | 0,463647609 | 0,100167421 | 1,094762509 | 2,038606387 | 4,155916 | 13,36899398 | 178,73  | 0,175786693 | 0,482558435 | 0,77243291  |

|   |             |             |             |             |          |             |         |             |             |             |
|---|-------------|-------------|-------------|-------------|----------|-------------|---------|-------------|-------------|-------------|
| t | 0,463647609 | 0,100167421 | 1,094762509 | 2,038606387 | 4,155916 | 13,36899398 | 178,73  | 0,175786693 | 0,482558435 | 0,77243291  |
| t | 0,463647609 | 0,100167421 | 1,094762509 | 2,038606387 | 4,155916 | 13,36899398 | 178,73  | 0,175786693 | 0,482558435 | 0,77243291  |
| t | 0,735314453 | 0,201357921 | 0,79539883  | 3,117860645 | 9,721055 | 13,25198098 | 175,615 | 0,186621728 | 0,492846814 | 0,77339211  |
| t | 0,601264217 | 0,225513406 | 0,916909265 | 2,863069856 | 8,197169 | 13,09713709 | 171,535 | 0,231081772 | 0,498419197 | 0,75955656  |
| t | 0,411516846 | 0           | 1,159279481 | 3,052873892 | 9,320039 | 14,01035331 | 196,29  | 0,172185281 | 0,422072604 | 0,760984364 |
| t | 0,601264217 | 0           | 0,96953211  | 3,313288397 | 10,97788 | 13,8192981  | 190,973 | 0,153183766 | 0,401048697 | 0,831490819 |
| t | 0,568675503 | 0           | 1,002120823 | 3,144321071 | 9,886755 | 13,45511055 | 181,04  | 0,204868682 | 0,460676094 | 0,77985035  |
| t | 0,694904938 | 0,100167421 | 0,855628871 | 2,416570711 | 5,839814 | 13,79623137 | 190,336 | 0,157422127 | 0,432217257 | 0,791360905 |
| t | 0,267763327 | 0,174083011 | 1,266103673 | 3,059790516 | 9,362318 | 13,88286714 | 192,734 | 0,174103439 | 0,432950963 | 0,765204074 |
| t | 0,694904938 | 0,100167421 | 0,855628871 | 2,972763529 | 8,837323 | 13,42441805 | 180,215 | 0,180107476 | 0,466490065 | 0,794607284 |
| t | 0,694904938 | 0,100167421 | 0,855628871 | 2,972763529 | 8,837323 | 13,42441805 | 180,215 | 0,180107476 | 0,466490065 | 0,794607284 |
| t | 0,694904938 | 0,100167421 | 0,855628871 | 2,972763529 | 8,837323 | 13,42441805 | 180,215 | 0,180107476 | 0,466490065 | 0,794607284 |
| t | 0,523598776 | 0           | 1,047197551 | 2,870298765 | 8,238615 | 13,97472719 | 195,293 | 0,166823057 | 0,382898194 | 0,823124951 |
| t | 0,476033818 | 0           | 1,094762509 | 2,817308112 | 7,937225 | 13,63363488 | 185,876 | 0,157834047 | 0,417903391 | 0,841975824 |
| t | 0,523598776 | 0           | 1,047197551 | 3,190531304 | 10,17949 | 13,65390054 | 186,429 | 0,178395687 | 0,409572149 | 0,839051069 |
| t | 0,694904938 | 0           | 0,875891389 | 3,856183346 | 14,87015 | 13,54197179 | 183,385 | 0,19461093  | 0,414665693 | 0,845044431 |
| t | 0,353741606 | 0,201357921 | 1,132647296 | 2,561120458 | 6,559338 | 13,91599799 | 193,655 | 0,177955995 | 0,411106031 | 0,789933426 |
| t | 0,523598776 | 0           | 1,047197551 | 3,026803925 | 9,161542 | 13,65034798 | 186,332 | 0,182055696 | 0,433205477 | 0,803762592 |
| t | 0,557598827 | 0,100167421 | 1,002120823 | 2,976348602 | 8,858651 | 13,81365267 | 190,817 | 0,165527087 | 0,394147108 | 0,837024748 |
| t | 0,535070807 | 0,141897055 | 1,002120823 | 3,157944268 | 9,972612 | 13,66623577 | 186,766 | 0,18208574  | 0,400394011 | 0,848379683 |
| t | 0,535070807 | 0,141897055 | 1,002120823 | 3,157944268 | 9,972612 | 13,66623577 | 186,766 | 0,18208574  | 0,400394011 | 0,848379683 |
| t | 0,535070807 | 0,141897055 | 1,002120823 | 3,157944268 | 9,972612 | 13,66623577 | 186,766 | 0,18208574  | 0,400394011 | 0,848379683 |
| t | 0,523598776 | 0,201357921 | 1,002120823 | 3,485874352 | 12,15132 | 13,91786622 | 193,707 | 0,187614365 | 0,406633439 | 0,789157799 |
| t | 0,611939715 | 0,201357921 | 0,916909265 | 3,181188457 | 10,11996 | 13,85756111 | 192,032 | 0,181580769 | 0,387413267 | 0,830958284 |
| t | 0,674490928 | 0           | 0,896305399 | 3,600758253 | 12,96546 | 13,46692244 | 181,358 | 0,212887077 | 0,419847306 | 0,840673385 |
| t | 0,755380134 | 0,225513406 | 0,765392826 | 3,493787343 | 12,20655 | 13,9837048  | 195,544 | 0,231965074 | 0,392121877 | 0,770939348 |
| t | 0,500179609 | 0,201357921 | 1,024395763 | 3,416722113 | 11,67399 | 13,72115156 | 188,27  | 0,187968822 | 0,393409913 | 0,84513699  |
| t | 0,338065255 | 0,100167421 | 1,217054721 | 3,488796354 | 12,1717  | 13,83997832 | 191,545 | 0,190806088 | 0,415618109 | 0,789138698 |
| t | 0,684719203 | 0,100167421 | 0,875891389 | 3,555840266 | 12,644   | 13,71313239 | 188,05  | 0,203190274 | 0,420672954 | 0,799170005 |

|   |             |             |             |             |          |             |         |             |             |             |
|---|-------------|-------------|-------------|-------------|----------|-------------|---------|-------------|-------------|-------------|
| t | 0,568675503 | 0,267763327 | 0,927295218 | 3,485874352 | 12,15132 | 13,8878004  | 192,871 | 0,242972829 | 0,396537539 | 0,774576419 |
| t | 0,568675503 | 0,267763327 | 0,927295218 | 3,485874352 | 12,15132 | 13,8878004  | 192,871 | 0,242972829 | 0,396537539 | 0,774576419 |
| t | 0,568675503 | 0,267763327 | 0,927295218 | 3,485874352 | 12,15132 | 13,8878004  | 192,871 | 0,242972829 | 0,396537539 | 0,774576419 |
| t | 0,694904938 | 0,225513406 | 0,815416193 | 3,375123701 | 11,39146 | 13,93208527 | 194,103 | 0,239796688 | 0,400243552 | 0,759935459 |
| t | 0,476033818 | 0,304692654 | 0,980296312 | 3,211647552 | 10,31468 | 14,07430282 | 198,086 | 0,21426253  | 0,389593122 | 0,769664367 |
| t | 0           | 0,286756552 | 1,284039775 | 2,860990038 | 8,185264 | 13,65902632 | 186,569 | 0,193122929 | 0,434690725 | 0,78834668  |
| t | 0,476033818 | 0,353741606 | 0,958856612 | 3,772650262 | 14,23289 | 14,27984594 | 203,914 | 0,267608258 | 0,37222299  | 0,726479404 |
| t | 0           | 0,201357921 | 1,369438406 | 3,470144089 | 12,0419  | 13,63444168 | 185,898 | 0,218583946 | 0,429270147 | 0,784408363 |
| t | 0           | 0,397699415 | 1,173096912 | 3,52825736  | 12,4486  | 13,47505102 | 181,577 | 0,208541094 | 0,444821115 | 0,800148603 |
| t | 0,643501109 | 0,304692654 | 0,835481874 | 3,183939384 | 10,13747 | 14,31813535 | 205,009 | 0,222864873 | 0,375350104 | 0,746608265 |
| t | 0,643501109 | 0,304692654 | 0,835481874 | 3,183939384 | 10,13747 | 14,31813535 | 205,009 | 0,222864873 | 0,375350104 | 0,746608265 |
| t | 0,643501109 | 0,304692654 | 0,835481874 | 3,183939384 | 10,13747 | 14,31813535 | 205,009 | 0,222864873 | 0,375350104 | 0,746608265 |
| t | 0,805403501 | 0,247467063 | 0,705052837 | 3,805457923 | 14,48151 | 13,92034482 | 193,776 | 0,253431915 | 0,41082151  | 0,741379122 |
| t | 0,451026812 | 0,476033818 | 0,886077124 | 3,216198066 | 10,34393 | 14,89355565 | 221,818 | 0,234620204 | 0,335547835 | 0,706888551 |
| t | 0,557598827 | 0,267763327 | 0,93774449  | 3,177247236 | 10,0949  | 14,96429083 | 223,93  | 0,199892471 | 0,333946454 | 0,717488872 |
| t | 0,601264217 | 0,286756552 | 0,886077124 | 3,454039664 | 11,93039 | 14,5196763  | 210,821 | 0,233664307 | 0,362886797 | 0,725874969 |
| t | 0,590500015 | 0           | 0,980296312 | 4,138161427 | 17,12438 | 14,07664733 | 198,152 | 0,239362902 | 0,383628403 | 0,763251222 |
| t | 0,725253222 | 0,225513406 | 0,79539883  | 3,098595327 | 9,601293 | 14,81978407 | 219,626 | 0,231822945 | 0,336583721 | 0,715418116 |
| t | 0,653887062 | 0,488205263 | 0,694904938 | 3,371151139 | 11,36466 | 14,13173733 | 199,706 | 0,243432321 | 0,39415571  | 0,737524851 |
| t | 0,674490928 | 0,267763327 | 0,825440953 | 3,358054496 | 11,27653 | 13,81466612 | 190,845 | 0,231822632 | 0,407754975 | 0,779735942 |
| t | 0,674490928 | 0,267763327 | 0,825440953 | 3,358054496 | 11,27653 | 13,81466612 | 190,845 | 0,231822632 | 0,407754975 | 0,779735942 |
| t | 0,674490928 | 0,267763327 | 0,825440953 | 3,358054496 | 11,27653 | 13,81466612 | 190,845 | 0,231822632 | 0,407754975 | 0,779735942 |
| t | 0,96953211  | 0,100167421 | 0,590500015 | 3,833234926 | 14,69369 | 14,23587019 | 202,66  | 0,225882232 | 0,380436432 | 0,751265559 |
| t | 0,463647609 | 0,304692654 | 1,002120823 | 3,656015591 | 13,36645 | 14,24387588 | 202,888 | 0,207668913 | 0,37476952  | 0,768530464 |
| t | 0,286756552 | 0           | 1,284039775 | 3,281127855 | 10,7658  | 14,49141125 | 210,001 | 0,176084962 | 0,358636252 | 0,766475347 |
| t | 0,397699415 | 0,174083011 | 1,132647296 | 4,210843146 | 17,7312  | 14,47007256 | 209,383 | 0,191976146 | 0,360998984 | 0,759960391 |
| t | 0,463647609 | 0           | 1,107148718 | 2,692905123 | 7,251738 | 14,77619708 | 218,336 | 0,151692068 | 0,346173609 | 0,751016675 |
| t | 0,411516846 | 0,286756552 | 1,058823639 | 3,305988506 | 10,92956 | 14,3572978  | 206,132 | 0,181596392 | 0,374567509 | 0,765987989 |
| t | 0,633051836 | 0,267763327 | 0,86574349  | 2,847835845 | 8,110169 | 14,45786983 | 209,03  | 0,17138695  | 0,372180187 | 0,75753234  |



|   |             |             |             |             |          |             |         |             |             |             |
|---|-------------|-------------|-------------|-------------|----------|-------------|---------|-------------|-------------|-------------|
| t | 0,397699415 | 0           | 1,173096912 | 2,952841852 | 8,719275 | 14,37696074 | 206,697 | 0,167820097 | 0,374068126 | 0,76958953  |
| t | 0,397699415 | 0           | 1,173096912 | 2,952841852 | 8,719275 | 14,37696074 | 206,697 | 0,167820097 | 0,374068126 | 0,76958953  |
| t | 0,397699415 | 0           | 1,173096912 | 2,952841852 | 8,719275 | 14,37696074 | 206,697 | 0,167820097 | 0,374068126 | 0,76958953  |
| t | 0,511972688 | 0,174083011 | 1,024395763 | 2,795211262 | 7,813206 | 14,06801336 | 197,909 | 0,190780336 | 0,403227426 | 0,770588398 |
| t | 0,546400564 | 0           | 1,024395763 | 3,190531304 | 10,17949 | 14,2407865  | 202,8   | 0,179967357 | 0,383355768 | 0,773572761 |
| t | 0,286756552 | 0,286756552 | 1,159279481 | 2,789932257 | 7,783722 | 14,70826298 | 216,333 | 0,151357989 | 0,358734517 | 0,746738856 |
| t | 0,725253222 | 0           | 0,845543105 | 2,614833264 | 6,837353 | 14,49168727 | 210,009 | 0,161766394 | 0,367082675 | 0,763730382 |
| t | 0,557598827 | 0,174083011 | 0,980296312 | 2,641027073 | 6,975024 | 13,93330542 | 194,137 | 0,18825602  | 0,429860817 | 0,752603355 |
| t | 0,451026812 | 0,174083011 | 1,217054721 | 2,863642785 | 8,20045  | 14,17906908 | 201,046 | 0,166603277 | 0,399784378 | 0,770061359 |
| t | 0,633051836 | 0           | 0,805403501 | 3,496242268 | 12,22371 | 13,593675   | 184,788 | 0,207938439 | 0,44241116  | 0,781499424 |
| t | 0,397699415 | 0,100167421 | 0,96953211  | 3,298122193 | 10,87761 | 14,72059781 | 216,696 | 0,170607415 | 0,376209387 | 0,719792274 |
| t | 0,397699415 | 0,100167421 | 0,96953211  | 3,298122193 | 10,87761 | 14,72059781 | 216,696 | 0,170607415 | 0,376209387 | 0,719792274 |
| t | 0,397699415 | 0,100167421 | 0,96953211  | 3,298122193 | 10,87761 | 14,72059781 | 216,696 | 0,170607415 | 0,376209387 | 0,719792274 |
| t | 0,511972688 | 0           | 1,058823639 | 2,656142504 | 7,055093 | 14,63915981 | 214,305 | 0,158454511 | 0,385230697 | 0,725054884 |
| t | 0,694904938 | 0,100167421 | 0,86574349  | 3,032976261 | 9,198945 | 14,07096301 | 197,992 | 0,173197224 | 0,425362563 | 0,745674889 |
| t | 0,916909265 | 0           | 0,653887062 | 2,952841852 | 8,719275 | 13,54396545 | 183,439 | 0,184285586 | 0,463250741 | 0,76945056  |
| t | 0,523598776 | 0           | 1,047197551 | 2,649930565 | 7,022132 | 13,61447759 | 185,354 | 0,173935665 | 0,459153778 | 0,770352193 |
| t | 0,568675503 | 0,100167421 | 0,991156586 | 2,546120382 | 6,482729 | 14,07277513 | 198,043 | 0,202020498 | 0,432058704 | 0,720516532 |
| t | 0           | 0           | 1,570796327 | 3,159852686 | 9,984669 | 14,5798834  | 212,573 | 0,171889128 | 0,388580558 | 0,722719734 |
| t | 0,451026812 | 0           | 1,119769515 | 3,091874512 | 9,559688 | 13,77483212 | 189,746 | 0,165065231 | 0,443932138 | 0,771091211 |
| t | 0,557598827 | 0,100167421 | 1,002120823 | 2,614136186 | 6,833708 | 14,01128117 | 196,316 | 0,165758073 | 0,434520397 | 0,743489912 |
| t | 0,557598827 | 0,100167421 | 1,002120823 | 2,614136186 | 6,833708 | 14,01128117 | 196,316 | 0,165758073 | 0,434520397 | 0,743489912 |
| t | 0,557598827 | 0,100167421 | 1,002120823 | 2,614136186 | 6,833708 | 14,01128117 | 196,316 | 0,165758073 | 0,434520397 | 0,743489912 |
| t | 0,411516846 | 0           | 1,159279481 | 2,69932825  | 7,286373 | 14,12511947 | 199,519 | 0,166832248 | 0,416718573 | 0,752105568 |
| t | 0,100167421 | 0,201357921 | 1,345282921 | 2,03835571  | 4,154894 | 15,22271329 | 231,731 | 0,183730251 | 0,371017984 | 0,665844626 |
| t | 0,397699415 | 0           | 1,173096912 | 2,598193603 | 6,75061  | 14,05894733 | 197,654 | 0,178965236 | 0,438423313 | 0,725973062 |
| t | 0,590500015 | 0,225513406 | 0,927295218 | 2,09029352  | 4,369327 | 14,04944839 | 197,387 | 0,195143904 | 0,436853732 | 0,721062584 |
| t | 0,500179609 | 0,100167421 | 1,058823639 | 3,371376573 | 11,36618 | 13,58992274 | 184,686 | 0,18593081  | 0,46709174  | 0,753906246 |
| t | 0,611939715 | 0           | 0,958856612 | 2,867420618 | 8,222101 | 14,33907249 | 205,609 | 0,15855569  | 0,418990028 | 0,724343851 |

|   |             |             |             |             |          |             |         |             |             |             |
|---|-------------|-------------|-------------|-------------|----------|-------------|---------|-------------|-------------|-------------|
| t | 0,684719203 | 0,100167421 | 0,875891389 | 4,291484592 | 18,41684 | 14,22947645 | 202,478 | 0,181878314 | 0,416093291 | 0,731076161 |
| t | 0,500179609 | 0,174083011 | 1,03572552  | 2,68633505  | 7,216396 | 14,03919513 | 197,099 | 0,234943741 | 0,425793921 | 0,713782243 |
| t | 0,500179609 | 0,174083011 | 1,03572552  | 2,68633505  | 7,216396 | 14,03919513 | 197,099 | 0,234943741 | 0,425793921 | 0,713782243 |
| t | 0,500179609 | 0,174083011 | 1,03572552  | 2,68633505  | 7,216396 | 14,03919513 | 197,099 | 0,234943741 | 0,425793921 | 0,713782243 |
| t | 0,451026812 | 0,174083011 | 1,082591063 | 2,60365858  | 6,779038 | 14,11003189 | 199,093 | 0,19512164  | 0,424416527 | 0,730640774 |
| t | 0,353741606 | 0,100167421 | 1,201933343 | 2,744541127 | 7,532506 | 14,06531194 | 197,833 | 0,173167738 | 0,428458098 | 0,74349513  |
| t | 0,568675503 | 0,201357921 | 0,958856612 | 2,457735136 | 6,040462 | 13,59227722 | 184,75  | 0,202374509 | 0,46140069  | 0,752551242 |
| t | 0,633051836 | 0,201357921 | 0,896305399 | 2,244850106 | 5,039352 | 13,31307628 | 177,238 | 0,181800386 | 0,48828287  | 0,771818894 |
| t | 0,397699415 | 0           | 1,173096912 | 3,355882894 | 11,26195 | 12,98160237 | 168,522 | 0,190388783 | 0,514792021 | 0,786352564 |
| t | 0,368862984 | 0           | 1,201933343 | 3,015249741 | 9,091731 | 13,26894871 | 176,065 | 0,19655751  | 0,494343793 | 0,7587853   |
| t | 0,611939715 | 0           | 0,958856612 | 2,777585822 | 7,714983 | 13,23336692 | 175,122 | 0,216983946 | 0,488733746 | 0,761810716 |
| t | 0,735314453 | 0,100167421 | 0,825440953 | 3,070736557 | 9,429423 | 13,59536686 | 184,834 | 0,175881332 | 0,469800992 | 0,753536805 |
| t | 0,735314453 | 0,100167421 | 0,825440953 | 3,070736557 | 9,429423 | 13,59536686 | 184,834 | 0,175881332 | 0,469800992 | 0,753536805 |
| t | 0,735314453 | 0,100167421 | 0,825440953 | 3,070736557 | 9,429423 | 13,59536686 | 184,834 | 0,175881332 | 0,469800992 | 0,753536805 |
| t | 0,715167456 | 0,174083011 | 0,825440953 | 2,734860143 | 7,47946  | 13,22459829 | 174,89  | 0,198161468 | 0,496110318 | 0,762294543 |
| t | 0,557598827 | 0,174083011 | 0,980296312 | 3,290074467 | 10,82459 | 13,29074866 | 176,644 | 0,183788364 | 0,492060948 | 0,765837174 |
| t | 0,568675503 | 0,174083011 | 0,96953211  | 3,002963203 | 9,017788 | 13,47827882 | 181,664 | 0,1913985   | 0,474879688 | 0,756049113 |
| t | 0,557598827 | 0,100167421 | 1,002120823 | 3,552651123 | 12,62133 | 13,35597245 | 178,382 | 0,20633304  | 0,483674934 | 0,753165142 |
| t | 0,304692654 | 0           | 1,266103673 | 2,630640416 | 6,920269 | 13,97132778 | 195,198 | 0,215482124 | 0,455426804 | 0,692029773 |
| t | 0,451026812 | 0,100167421 | 1,107148718 | 2,902853596 | 8,426559 | 13,74456256 | 188,913 | 0,191391806 | 0,457245949 | 0,739105254 |
| t | 0,304692654 | 0,100167421 | 1,249045772 | 2,949576241 | 8,7      | 13,36817115 | 178,708 | 0,204267224 | 0,4888078   | 0,741557008 |
| t | 0,633051836 | 0,100167421 | 0,927295218 | 4,036280466 | 16,29156 | 12,98714749 | 168,666 | 0,249549049 | 0,514453246 | 0,72460257  |
| t | 0,633051836 | 0,100167421 | 0,927295218 | 4,036280466 | 16,29156 | 12,98714749 | 168,666 | 0,249549049 | 0,514453246 | 0,72460257  |
| t | 0,633051836 | 0,100167421 | 0,927295218 | 4,036280466 | 16,29156 | 12,98714749 | 168,666 | 0,249549049 | 0,514453246 | 0,72460257  |
| t | 0,601264217 | 0           | 0,96953211  | 3,625745441 | 13,14603 | 13,26642378 | 175,998 | 0,270828986 | 0,487350688 | 0,701787643 |
| t | 0,735314453 | 0,201357921 | 0,79539883  | 3,824975817 | 14,63044 | 12,90166656 | 166,453 | 0,281500602 | 0,519657665 | 0,692635129 |
| t | 0,304692654 | 0,225513406 | 1,187299323 | 2,758229686 | 7,607831 | 14,57230249 | 212,352 | 0,207152719 | 0,422295465 | 0,668048174 |
| t | 0,653887062 | 0           | 0,916909265 | 3,866235896 | 14,94778 | 12,74754878 | 162,5   | 0,338842412 | 0,509894931 | 0,671045373 |
| t | 0           | 0,174083011 | 1,396713316 | 3,398879227 | 11,55238 | 15,50116125 | 240,286 | 0,351285637 | 0,35040804  | 0,562221618 |

|   |             |             |             |             |          |             |         |             |             |             |
|---|-------------|-------------|-------------|-------------|----------|-------------|---------|-------------|-------------|-------------|
| t | 0,643501109 | 0           | 0,927295218 | 3,439071096 | 11,82721 | 12,99869224 | 168,966 | 0,257846122 | 0,51793178  | 0,703856393 |
| t | 0,96953211  | 0,225513406 | 0,546400564 | 4,271739692 | 18,24776 | 12,86468033 | 165,5   | 0,293718411 | 0,514941818 | 0,702261313 |
| t | 0,557598827 | 0           | 1,0131975   | 3,995439901 | 15,96354 | 13,52124255 | 182,824 | 0,326563411 | 0,470746057 | 0,630063705 |
| t | 0,557598827 | 0           | 1,0131975   | 3,995439901 | 15,96354 | 13,52124255 | 182,824 | 0,326563411 | 0,470746057 | 0,630063705 |
| t | 0,557598827 | 0           | 1,0131975   | 3,995439901 | 15,96354 | 13,52124255 | 182,824 | 0,326563411 | 0,470746057 | 0,630063705 |
| t | 0,601264217 | 0,286756552 | 0,886077124 | 4,093375136 | 16,75572 | 14,54912368 | 211,677 | 0,274833873 | 0,413812393 | 0,641533203 |
| t | 0           | 0,225513406 | 1,345282921 | 3,352686982 | 11,24051 | 16,41840431 | 269,564 | 0,305980334 | 0,320905418 | 0,547007523 |
| t | 0           | 0,174083011 | 1,396713316 | 3,198917004 | 10,23307 | 14,45108992 | 208,834 | 0,369752382 | 0,395707684 | 0,591447769 |
| t | 0           | 0           | 1,570796327 | 3,492131154 | 12,19498 | 14,32773534 | 205,284 | 0,462872533 | 0,372271986 | 0,526010598 |
| t | 0           | 0           | 1,570796327 | 3,523169028 | 12,41272 | 14,53282491 | 211,203 | 0,270651067 | 0,412846746 | 0,648316815 |
| t | 0           | 0           | 1,570796327 | 3,205133383 | 10,27288 | 16,10499922 | 259,371 | 0,22710081  | 0,321071706 | 0,609385947 |
| t | 0           | 0           | 1,570796327 | 3,423904204 | 11,72312 | 15,52617145 | 241,062 | 0,380984008 | 0,348736719 | 0,537551297 |
| t | 0           | 0           | 1,570796327 | 3,91248131  | 15,30751 | 15,12954064 | 228,903 | 0,282423733 | 0,371240041 | 0,624132698 |
| t | 0           | 0           | 1,570796327 | 3,91248131  | 15,30751 | 15,12954064 | 228,903 | 0,282423733 | 0,371240041 | 0,624132698 |
| t | 0           | 0           | 1,570796327 | 3,91248131  | 15,30751 | 15,12954064 | 228,903 | 0,282423733 | 0,371240041 | 0,624132698 |
| t | 0           | 0           | 1,570796327 | 3,404558709 | 11,59102 | 15,73969504 | 247,738 | 0,243615583 | 0,371240337 | 0,595978577 |
| t | 0           | 0,100167421 | 1,470628906 | 3,726405775 | 13,8861  | 14,90681052 | 222,213 | 0,265399336 | 0,395690111 | 0,632123204 |
| t | 0           | 0           | 1,570796327 | 3,563366386 | 12,69758 | 14,74920337 | 217,539 | 0,272941167 | 0,400298029 | 0,638008972 |
| t | 0,715167456 | 0           | 0,855628871 | 3,198917004 | 10,23307 | 13,31307628 | 177,238 | 0,181800386 | 0,567713447 | 0,676694761 |
| t | 0           | 0,201357921 | 1,369438406 | 4,128801279 | 17,047   | 12,98160237 | 168,522 | 0,190388783 | 0,392702604 | 0,663507018 |
| t | 0,546400564 | 0           | 1,024395763 | 4,280428717 | 18,32207 | 13,26894871 | 176,065 | 0,19655751  | 0,585111689 | 0,685318846 |
| t | 0,815416193 | 0           | 0,755380134 | 3,355882894 | 11,26195 | 13,23336692 | 175,122 | 0,216983946 | 0,513757407 | 0,632265113 |
| t | 0,451026812 | 0,100167421 | 1,107148718 | 4,374286227 | 19,13438 | 13,59536686 | 184,834 | 0,175881332 | 0,554891652 | 0,679478226 |
| t | 0,500179609 | 0,286756552 | 0,980296312 | 4,159944711 | 17,30514 | 13,22459829 | 174,89  | 0,198161468 | 0,445105275 | 0,632863868 |
| t | 0,500179609 | 0,286756552 | 0,980296312 | 4,159944711 | 17,30514 | 13,22459829 | 174,89  | 0,198161468 | 0,445105275 | 0,632863868 |
| t | 0,500179609 | 0,286756552 | 0,980296312 | 4,159944711 | 17,30514 | 13,22459829 | 174,89  | 0,198161468 | 0,445105275 | 0,632863868 |
| t | 0           | 0,201357921 | 1,369438406 | 1,265585635 | 1,601707 | 13,29074866 | 176,644 | 0,183788364 | 0,388097474 | 0,621983507 |
| t | 0           | 0,100167421 | 1,470628906 | 3,833433187 | 14,69521 | 13,47827882 | 181,664 | 0,1913985   | 0,340465957 | 0,634647786 |
| t | 0           | 0           | 1,570796327 | 3,451321486 | 11,91162 | 13,35597245 | 178,382 | 0,20633304  | 0,326987746 | 0,622776482 |

|   |             |             |             |             |          |             |         |             |             |             |
|---|-------------|-------------|-------------|-------------|----------|-------------|---------|-------------|-------------|-------------|
| t | 0,93774449  | 0           | 0,633051836 | 4,333354359 | 18,77796 | 13,97132778 | 195,198 | 0,215482124 | 0,513838944 | 0,682044827 |
| t | 0           | 0           | 1,570796327 | 3,388307837 | 11,48063 | 13,74456256 | 188,913 | 0,191391806 | 0,332760978 | 0,639830793 |
| t | 0           | 0,174083011 | 1,396713316 | 3,828144459 | 14,65469 | 13,36817115 | 178,708 | 0,204267224 | 0,407393489 | 0,649740334 |
| t | 0           | 0,201357921 | 1,369438406 | 4,028328437 | 16,22743 | 12,98714749 | 168,666 | 0,249549049 | 0,405922879 | 0,631355222 |
| t | 0,643501109 | 0,174083011 | 0,896305399 | 2,834861725 | 8,036441 | 13,26642378 | 175,998 | 0,270828986 | 0,413896045 | 0,623783029 |
| t | 0,643501109 | 0,174083011 | 0,896305399 | 2,834861725 | 8,036441 | 13,26642378 | 175,998 | 0,270828986 | 0,413896045 | 0,623783029 |
| t | 0,643501109 | 0,174083011 | 0,896305399 | 2,834861725 | 8,036441 | 13,26642378 | 175,998 | 0,270828986 | 0,413896045 | 0,623783029 |
| t | 0,201357921 | 0,201357921 | 1,284039775 | 3,427181057 | 11,74557 | 12,90166656 | 166,453 | 0,281500602 | 0,48681154  | 0,680154753 |
| t | 0,755380134 | 0           | 0,815416193 | 2,994118067 | 8,964743 | 14,57230249 | 212,352 | 0,207152719 | 0,518694655 | 0,693915907 |
| t | 0,735314453 | 0           | 0,835481874 | 3,553153529 | 12,6249  | 12,74754878 | 162,5   | 0,338842412 | 0,509924508 | 0,688978888 |
| t | 0,267763327 | 0,100167421 | 1,284039775 | 3,789253225 | 14,35844 | 15,50116125 | 240,286 | 0,351285637 | 0,517022423 | 0,767308317 |
| t | 0,633051836 | 0,100167421 | 0,927295218 | 3,319415611 | 11,01852 | 12,99869224 | 168,966 | 0,257846122 | 0,483220569 | 0,693599406 |
| t | 0,855628871 | 0,100167421 | 0,705052837 | 3,240182094 | 10,49878 | 12,86468033 | 165,5   | 0,293718411 | 0,50682279  | 0,702321239 |
| t | 0,755380134 | 0,201357921 | 0,775397497 | 3,57998324  | 12,81628 | 13,52124255 | 182,824 | 0,326563411 | 0,512614818 | 0,706906573 |
| t | 0,286756552 | 0           | 1,284039775 | 3,677514106 | 13,52411 | 14,54912368 | 211,677 | 0,274833873 | 0,508139744 | 0,72246533  |
| t | 0,286756552 | 0           | 1,284039775 | 3,677514106 | 13,52411 | 14,54912368 | 211,677 | 0,274833873 | 0,508139744 | 0,72246533  |
| t | 0,286756552 | 0           | 1,284039775 | 3,677514106 | 13,52411 | 14,54912368 | 211,677 | 0,274833873 | 0,508139744 | 0,72246533  |
| t | 0,611939715 | 0           | 0,958856612 | 3,616477568 | 13,07891 | 16,41840431 | 269,564 | 0,305980334 | 0,497373666 | 0,760219523 |
| t | 0,174083011 | 0,267763327 | 1,249045772 | 3,433188023 | 11,78678 | 14,45108992 | 208,834 | 0,369752382 | 0,469330138 | 0,7504036   |
| t | 0,411516846 | 0           | 1,159279481 | 3,434763456 | 11,7976  | 15,12954064 | 228,903 | 0,282423733 | 0,500409714 | 0,76297745  |
| t | 0,267763327 | 0,174083011 | 1,249045772 | 2,746709668 | 7,544414 | 14,53282491 | 211,203 | 0,270651067 | 0,387057216 | 0,686475168 |
| t | 0,225513406 | 0,225513406 | 1,249045772 | 3,062000653 | 9,375848 | 13,09144759 | 171,386 | 0,223634793 | 0,508000698 | 0,764726075 |
| t | 0,601264217 | 0           | 0,96953211  | 2,948300527 | 8,692476 | 16,10499922 | 259,371 | 0,22710081  | 0,48577299  | 0,740997933 |
| t | 0,568675503 | 0           | 1,002120823 | 1,304769711 | 1,702424 | 15,52617145 | 241,062 | 0,380984008 | 0,480487013 | 0,765672547 |
| t | 0,601264217 | 0,304692654 | 0,875891389 | 3,020575938 | 9,123879 | 15,73969504 | 247,738 | 0,243615583 | 0,496480133 | 0,758379817 |
| t | 0,601264217 | 0,304692654 | 0,875891389 | 3,020575938 | 9,123879 | 15,73969504 | 247,738 | 0,243615583 | 0,496480133 | 0,758379817 |
| t | 0,601264217 | 0,304692654 | 0,875891389 | 3,020575938 | 9,123879 | 15,73969504 | 247,738 | 0,243615583 | 0,496480133 | 0,758379817 |
| t | 0,286756552 | 0,286756552 | 1,159279481 | 3,231821468 | 10,44467 | 14,90681052 | 222,213 | 0,265399336 | 0,430885965 | 0,730425378 |
| t | 0,368862984 | 0,100167421 | 1,159279481 | 3,67786351  | 13,52668 | 14,74920337 | 217,539 | 0,272941167 | 0,409754991 | 0,726194015 |

|   |             |             |             |             |          |             |         |             |             |             |
|---|-------------|-------------|-------------|-------------|----------|-------------|---------|-------------|-------------|-------------|
| t | 0,463647609 | 0,174083011 | 1,070616718 | 3,194526569 | 10,205   | 13,69532767 | 187,562 | 0,216889201 | 0,454959055 | 0,737233408 |
| t | 0,353741606 | 0,286756552 | 1,107148718 | 3,93491296  | 15,48354 | 14,32885201 | 205,316 | 0,172307483 | 0,411438009 | 0,726663476 |
| t | 0,476033818 | 0,286756552 | 1,002120823 | 3,623374118 | 13,12884 | 14,31537635 | 204,93  | 0,18270583  | 0,410815774 | 0,727226217 |
| t | 0,286756552 | 0,100167421 | 1,266103673 | 3,174696836 | 10,0787  | 13,89697809 | 193,126 | 0,206243358 | 0,441367754 | 0,732771549 |
| t | 0,424988783 | 0           | 1,145807544 | 3,071100129 | 9,431656 | 14,00514191 | 196,144 | 0,18980765  | 0,442185092 | 0,724008742 |
| t | 0,368862984 | 0,353741606 | 1,047197551 | 3,273415647 | 10,71525 | 14,07089194 | 197,99  | 0,185449413 | 0,435231365 | 0,726695195 |
| t | 0,368862984 | 0,353741606 | 1,047197551 | 3,273415647 | 10,71525 | 14,07089194 | 197,99  | 0,185449413 | 0,435231365 | 0,726695195 |
| t | 0,368862984 | 0,353741606 | 1,047197551 | 3,273415647 | 10,71525 | 14,07089194 | 197,99  | 0,185449413 | 0,435231365 | 0,726695195 |
| t | 0,424988783 | 0           | 1,145807544 | 3,401833329 | 11,57247 | 14,03207041 | 196,899 | 0,220220495 | 0,436926636 | 0,705799467 |
| t | 0,476033818 | 0,201357921 | 1,047197551 | 3,414352062 | 11,6578  | 14,03050249 | 196,855 | 0,201357895 | 0,437039822 | 0,717080489 |
| t | 0,353741606 | 0,353741606 | 1,058823639 | 3,114049614 | 9,697305 | 14,12331406 | 199,468 | 0,211743611 | 0,421558322 | 0,721352873 |
| t | 0,500179609 | 0           | 1,070616718 | 2,617552483 | 6,851581 | 14,38109871 | 206,816 | 0,163080984 | 0,393967848 | 0,746596028 |
| t | 0,411516846 | 0,100167421 | 1,145807544 | 3,126705774 | 9,776289 | 14,19436508 | 201,48  | 0,181336658 | 0,423297917 | 0,725726717 |
| t | 0,590500015 | 0           | 0,96953211  | 2,748500318 | 7,554254 | 14,44600291 | 208,687 | 0,168593823 | 0,411559261 | 0,714409612 |
| t | 0,523598776 | 0,100167421 | 1,03572552  | 2,381760063 | 5,672781 | 13,9458596  | 194,487 | 0,174388053 | 0,440028118 | 0,743555241 |
| t | 0,546400564 | 0           | 1,024395763 | 3,995976727 | 15,96783 | 14,25149115 | 203,105 | 0,160452732 | 0,418098412 | 0,733997778 |
| t | 0,546400564 | 0           | 1,024395763 | 3,995976727 | 15,96783 | 14,25149115 | 203,105 | 0,160452732 | 0,418098412 | 0,733997778 |
| t | 0,546400564 | 0           | 1,024395763 | 3,995976727 | 15,96783 | 14,25149115 | 203,105 | 0,160452732 | 0,418098412 | 0,733997778 |
| t | 0,424988783 | 0           | 1,145807544 | 3,41862253  | 11,68698 | 14,11176814 | 199,142 | 0,170656985 | 0,41275953  | 0,759689537 |
| t | 0,694904938 | 0           | 0,875891389 | 2,915489839 | 8,500081 | 14,19355488 | 201,457 | 0,173477118 | 0,404080936 | 0,756499977 |
| t | 0,353741606 | 0           | 1,217054721 | 2,550625414 | 6,50569  | 15,03825123 | 226,149 | 0,137055579 | 0,357672201 | 0,713532073 |
| t | 0,286756552 | 0,174083011 | 1,232731072 | 2,270138102 | 5,153527 | 14,60239706 | 213,23  | 0,149637144 | 0,37458234  | 0,746033009 |
| t | 0,286756552 | 0,225513406 | 1,201933343 | 2,830179853 | 8,009918 | 15,5199549  | 240,869 | 0,140294713 | 0,3421009   | 0,676555068 |
| t | 0,424988783 | 0           | 1,145807544 | 3,554702519 | 12,63591 | 14,68587757 | 215,675 | 0,168538076 | 0,377304526 | 0,723222246 |
| t | 0,633051836 | 0           | 0,93774449  | 2,810401573 | 7,898357 | 14,53292813 | 211,206 | 0,165017873 | 0,384935547 | 0,735394152 |
| t | 0,463647609 | 0           | 1,107148718 | 2,885944386 | 8,328675 | 14,12575662 | 199,537 | 0,154437267 | 0,424876295 | 0,744401844 |
| t | 0,463647609 | 0           | 1,107148718 | 2,885944386 | 8,328675 | 14,12575662 | 199,537 | 0,154437267 | 0,424876295 | 0,744401844 |
| t | 0,463647609 | 0           | 1,107148718 | 2,885944386 | 8,328675 | 14,12575662 | 199,537 | 0,154437267 | 0,424876295 | 0,744401844 |
| t | 0,100167421 | 0,174083011 | 1,369438406 | 2,805785452 | 7,872432 | 14,80503293 | 219,189 | 0,160052378 | 0,349496909 | 0,740859386 |

|   |             |             |             |             |          |             |         |             |             |             |
|---|-------------|-------------|-------------|-------------|----------|-------------|---------|-------------|-------------|-------------|
| t | 0,286756552 | 0           | 1,284039775 | 2,593138832 | 6,724369 | 14,39683993 | 207,269 | 0,201397772 | 0,391692549 | 0,729826523 |
| t | 0,500179609 | 0,174083011 | 1,03572552  | 2,765198365 | 7,646322 | 14,87954972 | 221,401 | 0,146764025 | 0,34897004  | 0,737166297 |
| t | 0,511972688 | 0,174083011 | 1,024395763 | 3,079448002 | 9,483    | 14,46336752 | 209,189 | 0,210369569 | 0,363485898 | 0,748455962 |
| t | 0,546400564 | 0           | 1,024395763 | 2,848861176 | 8,11601  | 14,20274621 | 201,718 | 0,174511406 | 0,398981163 | 0,762638304 |
| t | 0,476033818 | 0,201357921 | 1,047197551 | 2,834861725 | 8,036441 | 14,87101207 | 221,147 | 0,16496121  | 0,355338815 | 0,725397663 |
| t | 0,397699415 | 0,286756552 | 1,070616718 | 2,959505026 | 8,75867  | 14,89496559 | 221,86  | 0,178015593 | 0,345361027 | 0,726201668 |
| t | 0,338065255 | 0,286756552 | 1,119769515 | 3,102083655 | 9,622923 | 14,48098754 | 209,699 | 0,199819647 | 0,378376    | 0,735401187 |
| t | 0,338065255 | 0,286756552 | 1,119769515 | 3,102083655 | 9,622923 | 14,48098754 | 209,699 | 0,199819647 | 0,378376    | 0,735401187 |
| t | 0,338065255 | 0,286756552 | 1,119769515 | 3,102083655 | 9,622923 | 14,48098754 | 209,699 | 0,199819647 | 0,378376    | 0,735401187 |
| t | 0           | 0,225513406 | 1,345282921 | 2,781868976 | 7,738795 | 15,36951528 | 236,222 | 0,162543567 | 0,32382068  | 0,697179363 |
| t | 0,590500015 | 0,100167421 | 0,96953211  | 3,265054364 | 10,66058 | 14,7154001  | 216,543 | 0,191244927 | 0,347029472 | 0,740380667 |
| t | 0,500179609 | 0,174083011 | 1,03572552  | 3,036659349 | 9,2213   | 14,62108067 | 213,776 | 0,190574708 | 0,36153521  | 0,739167118 |
| t | 0,424988783 | 0,523598776 | 0,86574349  | 3,288820457 | 10,81634 | 14,97220759 | 224,167 | 0,215305275 | 0,35073342  | 0,694027467 |
| t | 0,353741606 | 0,225513406 | 1,145807544 | 3,017940689 | 9,107966 | 14,62815778 | 213,983 | 0,209134236 | 0,357602213 | 0,732653695 |
| t | 0,500179609 | 0,201357921 | 1,024395763 | 2,552096001 | 6,513194 | 14,08019886 | 198,252 | 0,191708742 | 0,397339836 | 0,774214331 |
| t | 0,725253222 | 0,201357921 | 0,805403501 | 3,456517033 | 11,94751 | 14,92115947 | 222,641 | 0,1988919   | 0,329348706 | 0,726858415 |
| t | 0,411516846 | 0,225513406 | 1,094762509 | 3,219434733 | 10,36476 | 15,04423478 | 226,329 | 0,172722857 | 0,332937789 | 0,72086313  |
| t | 0,411516846 | 0,225513406 | 1,094762509 | 3,219434733 | 10,36476 | 15,04423478 | 226,329 | 0,172722857 | 0,332937789 | 0,72086313  |
| t | 0,411516846 | 0,225513406 | 1,094762509 | 3,219434733 | 10,36476 | 15,04423478 | 226,329 | 0,172722857 | 0,332937789 | 0,72086313  |
| t | 0,368862984 | 0,463647609 | 0,958856612 | 3,188976325 | 10,16957 | 15,09350854 | 227,814 | 0,210792981 | 0,334094166 | 0,697838521 |
| t | 0,643501109 | 0,338065255 | 0,815416193 | 3,139750627 | 9,858034 | 14,50068964 | 210,27  | 0,217075396 | 0,374537699 | 0,725513293 |
| t | 0,735314453 | 0,286756552 | 0,755380134 | 3,205916406 | 10,2779  | 14,85930685 | 220,799 | 0,198803234 | 0,347778881 | 0,717636125 |
| t | 0           | 0,201357921 | 1,369438406 | 3,763880976 | 14,1668  | 14,06385438 | 197,792 | 0,237265451 | 0,386010583 | 0,760637644 |
| t | 0,805403501 | 0,174083011 | 0,735314453 | 3,462785006 | 11,99088 | 13,96506355 | 195,023 | 0,260346272 | 0,406571085 | 0,734601026 |
| t | 0,225513406 | 0,338065255 | 1,159279481 | 2,628942563 | 6,911339 | 14,30898319 | 204,747 | 0,243015669 | 0,381468156 | 0,728681008 |
| t | 1,0131975   | 0           | 0,557598827 | 3,367408499 | 11,33944 | 14,60054793 | 213,176 | 0,224920972 | 0,357498354 | 0,725885443 |
| t | 0           | 0,267763327 | 1,303033    | 4,262303368 | 18,16723 | 14,78614216 | 218,63  | 0,200280327 | 0,335624696 | 0,737624205 |
| t | 0           | 0,267763327 | 1,303033    | 4,262303368 | 18,16723 | 14,78614216 | 218,63  | 0,200280327 | 0,335624696 | 0,737624205 |
| t | 0           | 0,267763327 | 1,303033    | 4,262303368 | 18,16723 | 14,78614216 | 218,63  | 0,200280327 | 0,335624696 | 0,737624205 |

|   |             |             |             |             |           |             |         |             |             |             |
|---|-------------|-------------|-------------|-------------|-----------|-------------|---------|-------------|-------------|-------------|
| t | 0           | 0,100167421 | 1,470628906 | 3,834998044 | 14,70721  | 13,66982077 | 186,864 | 0,250220031 | 0,415259692 | 0,778178813 |
| t | 0           | 0,201357921 | 1,369438406 | 3,029344153 | 9,176926  | 13,78129167 | 189,924 | 0,211940536 | 0,41729794  | 0,782087139 |
| t | 0,141897055 | 0,174083011 | 1,345282921 | 3,905210622 | 15,25067  | 14,49703418 | 210,164 | 0,22929872  | 0,367758769 | 0,725466357 |
| t | 0,775397497 | 0,225513406 | 0,745355373 | 3,198917004 | 10,23307  | 15,07617325 | 227,291 | 0,191625323 | 0,337556926 | 0,705468363 |
| t | 0,201357921 | 0,174083011 | 1,303033    | 3,195280895 | 10,20982  | 14,17762321 | 201,005 | 0,242375122 | 0,38777263  | 0,737397667 |
| t | 0           | 0           | 1,570796327 | 2,985246388 | 8,911696  | 14,46098199 | 209,12  | 0,228870171 | 0,367054613 | 0,731211256 |
| t | 0           | 0,267763327 | 1,303033    | 3,901813681 | 15,22415  | 14,50568854 | 210,415 | 0,267832377 | 0,363489509 | 0,70546816  |
| t | 0           | 0,267763327 | 1,303033    | 3,901813681 | 15,22415  | 14,50568854 | 210,415 | 0,267832377 | 0,363489509 | 0,70546816  |
| t | 0           | 0,267763327 | 1,303033    | 3,901813681 | 15,22415  | 14,50568854 | 210,415 | 0,267832377 | 0,363489509 | 0,70546816  |
| t | 0,93774449  | 0,267763327 | 0,557598827 | 4,937327212 | 24,3772   | 14,17550705 | 200,945 | 0,270031684 | 0,381508384 | 0,725126202 |
| t | 0,805403501 | 0,225513406 | 0,715167456 | 3,214431521 | 10,33257  | 14,67514906 | 215,36  | 0,226535476 | 0,367275032 | 0,704654783 |
| t | 0,286756552 | 0,353741606 | 1,107148718 | 3,346257611 | 11,19744  | 14,85513379 | 220,675 | 0,215347386 | 0,358146269 | 0,699330148 |
| t | 0,424988783 | 0           | 1,145807544 | 3,707536918 | 13,74583  | 15,08545657 | 227,571 | 0,203745962 | 0,345946554 | 0,691325538 |
| t | 0           | 0,267763327 | 1,303033    | 3,131207115 | 9,804458  | 15,04629523 | 226,391 | 0,167016115 | 0,332124966 | 0,723425208 |
| t | 0,397699415 | 0,476033818 | 0,927295218 | 3,602751726 | 12,97982  | 14,86048451 | 220,834 | 0,210330857 | 0,350942096 | 0,708827319 |
| t | 0,896305399 | 0,286756552 | 0,590500015 | 0,961981445 | 0,9254083 | 14,88250651 | 221,489 | 0,217810751 | 0,34637909  | 0,70632112  |
| t | 0,755380134 | 0,286756552 | 0,735314453 | 3,499429954 | 12,24601  | 14,42899858 | 208,196 | 0,218532307 | 0,369485062 | 0,739170834 |
| t | 0,755380134 | 0,286756552 | 0,735314453 | 3,499429954 | 12,24601  | 14,42899858 | 208,196 | 0,218532307 | 0,369485062 | 0,739170834 |
| t | 0,755380134 | 0,286756552 | 0,735314453 | 3,499429954 | 12,24601  | 14,42899858 | 208,196 | 0,218532307 | 0,369485062 | 0,739170834 |
| t | 0,735314453 | 0,267763327 | 0,765392826 | 2,395088516 | 5,736449  | 14,21084093 | 201,948 | 0,191498738 | 0,394844219 | 0,754805379 |
| t | 0,201357921 | 0,286756552 | 1,217054721 | 3,248522741 | 10,5529   | 14,77538494 | 218,312 | 0,191672251 | 0,356510063 | 0,722439122 |
| t | 0,424988783 | 0           | 1,145807544 | 2,712926833 | 7,359972  | 14,27697447 | 203,832 | 0,214231122 | 0,383343227 | 0,747976637 |
| t | 0,201357921 | 0,174083011 | 1,303033    | 2,58257604  | 6,669699  | 14,47522021 | 209,532 | 0,19204477  | 0,375717181 | 0,740977553 |
| t | 0,424988783 | 0           | 1,145807544 | 2,785865934 | 7,761049  | 14,9594786  | 223,786 | 0,17482262  | 0,348019599 | 0,71787854  |
| t | 0,601264217 | 0,201357921 | 0,927295218 | 2,474470246 | 6,123003  | 14,38294128 | 206,869 | 0,202855472 | 0,379353049 | 0,743998877 |
| t | 0,174083011 | 0           | 1,396713316 | 2,746323178 | 7,542291  | 15,1018873  | 228,067 | 0,163065098 | 0,323980266 | 0,725622172 |
| t | 0,523598776 | 0,100167421 | 1,03572552  | 4,268012418 | 18,21593  | 14,55362498 | 211,808 | 0,193043145 | 0,36893018  | 0,739269856 |
| t | 0,523598776 | 0,100167421 | 1,03572552  | 4,268012418 | 18,21593  | 14,55362498 | 211,808 | 0,193043145 | 0,36893018  | 0,739269856 |
| t | 0,523598776 | 0,100167421 | 1,03572552  | 4,268012418 | 18,21593  | 14,55362498 | 211,808 | 0,193043145 | 0,36893018  | 0,739269856 |

|   |             |             |             |             |          |             |         |             |             |             |
|---|-------------|-------------|-------------|-------------|----------|-------------|---------|-------------|-------------|-------------|
| t | 0,476033818 | 0,100167421 | 1,082591063 | 3,492927139 | 12,20054 | 15,15166658 | 229,573 | 0,154449964 | 0,334744409 | 0,715575552 |
| t | 0,397699415 | 0,201357921 | 1,119769515 | 2,633135014 | 6,9334   | 15,00623204 | 225,187 | 0,205297811 | 0,348001195 | 0,699339892 |
| t | 0,201357921 | 0,304692654 | 1,201933343 | 3,846720681 | 14,79726 | 15,10946723 | 228,296 | 0,191346313 | 0,342356178 | 0,699521977 |
| t | 0,353741606 | 0           | 1,217054721 | 2,926037936 | 8,561698 | 15,16749815 | 230,053 | 0,180465742 | 0,336333589 | 0,702558699 |
| t | 0,397699415 | 0           | 1,173096912 | 2,844110757 | 8,088966 | 14,86990249 | 221,114 | 0,168618153 | 0,364473052 | 0,715753984 |
| t | 0,353741606 | 0,225513406 | 1,145807544 | 3,222924138 | 10,38724 | 14,82865469 | 219,889 | 0,177871429 | 0,36669697  | 0,712708786 |
| t | 0,476033818 | 0,225513406 | 1,03572552  | 3,257007829 | 10,6081  | 14,82190946 | 219,689 | 0,184465555 | 0,368670855 | 0,708935079 |
| t | 0,286756552 | 0,201357921 | 1,217054721 | 2,844295519 | 8,090017 | 15,49725782 | 240,165 | 0,173573082 | 0,327741181 | 0,678180869 |
| t | 0,286756552 | 0,201357921 | 1,217054721 | 2,844295519 | 8,090017 | 15,49725782 | 240,165 | 0,173573082 | 0,327741181 | 0,678180869 |
| t | 0,286756552 | 0,201357921 | 1,217054721 | 2,844295519 | 8,090017 | 15,49725782 | 240,165 | 0,173573082 | 0,327741181 | 0,678180869 |
| t | 0,174083011 | 0,174083011 | 1,323329264 | 3,173695007 | 10,07234 | 15,93882053 | 254,046 | 0,166459305 | 0,313723023 | 0,650644697 |
| t | 0,463647609 | 0,225513406 | 1,047197551 | 2,697829869 | 7,278286 | 15,14143322 | 229,263 | 0,158435225 | 0,348901256 | 0,703152067 |
| t | 0,100167421 | 0,353741606 | 1,201933343 | 2,491754201 | 6,208839 | 15,23791324 | 232,194 | 0,185084886 | 0,340177856 | 0,690385788 |
| t | 0,174083011 | 0,100167421 | 1,369438406 | 2,720525317 | 7,401258 | 15,14493315 | 229,369 | 0,169671234 | 0,348293845 | 0,699793053 |
| t | 0,353741606 | 0           | 1,217054721 | 3,233833638 | 10,45768 | 13,27584272 | 176,248 | 0,20374904  | 0,483461515 | 0,7718344   |
| t | 0,225513406 | 0,267763327 | 1,217054721 | 2,574488687 | 6,627992 | 15,60961242 | 243,66  | 0,155588592 | 0,311223198 | 0,685112927 |
| t | 0,353741606 | 0           | 1,217054721 | 3,41614988  | 11,67008 | 15,41878724 | 237,739 | 0,164052292 | 0,332711418 | 0,685420371 |
| t | 0,353741606 | 0           | 1,217054721 | 3,41614988  | 11,67008 | 15,41878724 | 237,739 | 0,164052292 | 0,332711418 | 0,685420371 |
| t | 0,353741606 | 0           | 1,217054721 | 3,41614988  | 11,67008 | 15,41878724 | 237,739 | 0,164052292 | 0,332711418 | 0,685420371 |
| t | 0,546400564 | 0           | 1,024395763 | 2,901573366 | 8,419128 | 13,39996269 | 179,559 | 0,209628395 | 0,471403802 | 0,763924363 |
| t | 0,267763327 | 0,267763327 | 1,187299323 | 2,692905123 | 7,251738 | 13,36297123 | 178,569 | 0,184428587 | 0,48465874  | 0,76256633  |
| t | 0,424988783 | 0           | 1,145807544 | 3,249493807 | 10,55921 | 13,29360749 | 176,72  | 0,201120213 | 0,483120424 | 0,770393011 |
| t | 0,353741606 | 0           | 1,217054721 | 2,90947607  | 8,465051 | 13,11571576 | 172,022 | 0,201753198 | 0,494919054 | 0,787782972 |
| t | 0,397699415 | 0,225513406 | 1,107148718 | 3,078778816 | 9,478879 | 13,4643975  | 181,29  | 0,238128178 | 0,468404212 | 0,733697886 |
| t | 0,338065255 | 0,100167421 | 1,217054721 | 2,570215166 | 6,606006 | 13,46978099 | 181,435 | 0,185463179 | 0,473788922 | 0,762408564 |
| t | 0,451026812 | 0           | 1,119769515 | 3,588023133 | 12,87391 | 13,0060755  | 169,158 | 0,237478048 | 0,498818138 | 0,772389996 |
| t | 0,174083011 | 0,267763327 | 1,249045772 | 2,830179853 | 8,009918 | 13,44325109 | 180,721 | 0,190625322 | 0,48610122  | 0,737065527 |
| t | 0,174083011 | 0,267763327 | 1,249045772 | 2,830179853 | 8,009918 | 13,44325109 | 180,721 | 0,190625322 | 0,48610122  | 0,737065527 |
| t | 0,174083011 | 0,267763327 | 1,249045772 | 2,830179853 | 8,009918 | 13,44325109 | 180,721 | 0,190625322 | 0,48610122  | 0,737065527 |



|   |             |             |             |             |          |             |         |             |             |             |
|---|-------------|-------------|-------------|-------------|----------|-------------|---------|-------------|-------------|-------------|
| t | 0,338065255 | 0           | 1,232731072 | 3,556461725 | 12,64842 | 12,93611224 | 167,343 | 0,238441889 | 0,508925806 | 0,763853797 |
| t | 0,353741606 | 0           | 1,217054721 | 3,648683324 | 13,31289 | 12,63273525 | 159,586 | 0,302381246 | 0,517412849 | 0,745886654 |
| t | 0,368862984 | 0           | 1,201933343 | 3,729367239 | 13,90818 | 13,15537913 | 173,064 | 0,248985572 | 0,485729029 | 0,75452024  |
| t | 0,451026812 | 0           | 1,119769515 | 4,100112194 | 16,81092 | 13,28736242 | 176,554 | 0,249000479 | 0,477967777 | 0,739560986 |
| t | 0,500179609 | 0           | 1,070616718 | 4,526910646 | 20,49292 | 13,64100436 | 186,077 | 0,270192185 | 0,453083755 | 0,698874072 |
| t | 0,96953211  | 0           | 0,601264217 | 4,164850538 | 17,34598 | 13,09492268 | 171,477 | 0,291361701 | 0,480913358 | 0,728620721 |
| t | 0,568675503 | 0,353741606 | 0,875891389 | 3,473855207 | 12,06767 | 12,8491634  | 165,101 | 0,365320489 | 0,476721413 | 0,686685257 |
| t | 0,225513406 | 0,201357921 | 1,266103673 | 3,945559529 | 15,56744 | 13,83170272 | 191,316 | 0,285803407 | 0,433215188 | 0,691201343 |
| t | 0,225513406 | 0,201357921 | 1,266103673 | 3,945559529 | 15,56744 | 13,83170272 | 191,316 | 0,285803407 | 0,433215188 | 0,691201343 |
| t | 0,225513406 | 0,201357921 | 1,266103673 | 3,945559529 | 15,56744 | 13,83170272 | 191,316 | 0,285803407 | 0,433215188 | 0,691201343 |
| t | 0,267763327 | 0,304692654 | 1,159279481 | 3,068364385 | 9,41486  | 13,98323997 | 195,531 | 0,291690068 | 0,423793008 | 0,67510704  |
| t | 0,353741606 | 0,100167421 | 1,201933343 | 3,358453513 | 11,27921 | 13,95969197 | 194,873 | 0,267136732 | 0,439982318 | 0,67649587  |
| t | 0,397699415 | 0,225513406 | 1,107148718 | 4,406971749 | 19,4214  | 12,99892303 | 168,972 | 0,298530458 | 0,499318933 | 0,698894579 |
| t | 0,368862984 | 0,174083011 | 1,159279481 | 3,216763902 | 10,34757 | 13,23276237 | 175,106 | 0,278027426 | 0,48475079  | 0,706768067 |
| t | 0,286756552 | 0,100167421 | 1,266103673 | 3,69549726  | 13,6567  | 13,75692553 | 189,253 | 0,309663921 | 0,445744802 | 0,657549978 |
| t | 0,653887062 | 0,225513406 | 0,86574349  | 3,488019495 | 12,16628 | 13,63469838 | 185,905 | 0,259641177 | 0,461303354 | 0,695786396 |
| t | 0,815416193 | 0,225513406 | 0,705052837 | 5,13636642  | 26,38226 | 12,55268895 | 157,57  | 0,352375105 | 0,507697939 | 0,705779211 |
| t | 0,715167456 | 0           | 0,855628871 | 3,701060659 | 13,69785 | 12,1290148  | 147,113 | 0,34229688  | 0,555998679 | 0,716526484 |
| t | 0,715167456 | 0           | 0,855628871 | 3,701060659 | 13,69785 | 12,1290148  | 147,113 | 0,34229688  | 0,555998679 | 0,716526484 |
| t | 0,715167456 | 0           | 0,855628871 | 3,701060659 | 13,69785 | 12,1290148  | 147,113 | 0,34229688  | 0,555998679 | 0,716526484 |
| t | 0,476033818 | 0           | 1,094762509 | 3,593310451 | 12,91188 | 12,63408089 | 159,62  | 0,310222548 | 0,520970719 | 0,720711768 |
| t | 0,694904938 | 0,201357921 | 0,835481874 | 4,386766463 | 19,24372 | 12,36203867 | 152,82  | 0,359454705 | 0,527777304 | 0,685974144 |
| t | 0,500179609 | 0,201357921 | 1,024395763 | 4,079835781 | 16,64506 | 13,2028406  | 174,315 | 0,308222837 | 0,487619148 | 0,670872875 |
| t | 0,500179609 | 0           | 1,070616718 | 6,348996771 | 40,30976 | 13,46268918 | 181,244 | 0,324993224 | 0,468932262 | 0,644164626 |
| t | 0           | 0           | 1,570796327 | 3,014457829 | 9,086956 | 12,55830403 | 157,711 | 0,500722985 | 0,441723    | 0,54337458  |
| t | 0,500179609 | 0           | 1,070616718 | 4,583699379 | 21,0103  | 14,44371836 | 208,621 | 0,30412136  | 0,414499969 | 0,623470725 |
| t | 0,225513406 | 0,286756552 | 1,201933343 | 3,873158917 | 15,00136 | 12,95866505 | 167,927 | 0,373215332 | 0,477092415 | 0,647415014 |
| t | 0,845543105 | 0           | 0,725253222 | 3,927846738 | 15,42798 | 13,94948028 | 194,588 | 0,360556325 | 0,427427842 | 0,608305486 |
| t | 0,845543105 | 0           | 0,725253222 | 3,927846738 | 15,42798 | 13,94948028 | 194,588 | 0,360556325 | 0,427427842 | 0,608305486 |

|   |             |             |             |             |          |             |         |             |             |             |
|---|-------------|-------------|-------------|-------------|----------|-------------|---------|-------------|-------------|-------------|
| t | 0,845543105 | 0           | 0,725253222 | 3,927846738 | 15,42798 | 13,94948028 | 194,588 | 0,360556325 | 0,427427842 | 0,608305486 |
| t | 0           | 0,225513406 | 1,345282921 | 4,21750163  | 17,78732 | 14,64643301 | 214,518 | 0,432098017 | 0,389866136 | 0,509834248 |
| t | 0           | 0           | 1,570796327 | 3,020575938 | 9,123879 | 13,81412321 | 190,83  | 0,355003127 | 0,45349968  | 0,58848534  |
| t | 0           | 0           | 1,570796327 | 4,778462096 | 22,8337  | 12,75390136 | 162,662 | 0,457748498 | 0,460876962 | 0,56062399  |
| t | 0           | 0           | 1,570796327 | 5,513096226 | 30,39423 | 14,9833908  | 224,502 | 0,31336782  | 0,417646132 | 0,566227054 |
| t | 0,201357921 | 0           | 1,369438406 | 2,777585822 | 7,714983 | 11,95746629 | 142,981 | 0,288034228 | 0,605659189 | 0,715251988 |
| t | 0           | 0           | 1,570796327 | 4,128801279 | 17,047   | 13,60477857 | 185,09  | 0,369661561 | 0,460759964 | 0,582556345 |
| t | 0           | 0           | 1,570796327 | 3,415259873 | 11,664   | 13,38521572 | 179,164 | 0,341813957 | 0,484011515 | 0,604399618 |
| t | 0,590500015 | 0,174083011 | 0,948262907 | 2,929608506 | 8,582606 | 12,41921898 | 154,237 | 0,274850354 | 0,568090898 | 0,697642618 |
| t | 0,590500015 | 0,174083011 | 0,948262907 | 2,929608506 | 8,582606 | 12,41921898 | 154,237 | 0,274850354 | 0,568090898 | 0,697642618 |
| t | 0,590500015 | 0,174083011 | 0,948262907 | 2,929608506 | 8,582606 | 12,41921898 | 154,237 | 0,274850354 | 0,568090898 | 0,697642618 |
| t | 0,875891389 | 0,100167421 | 0,684719203 | 3,749285265 | 14,05714 | 11,72467484 | 137,468 | 0,356499209 | 0,595373865 | 0,697282767 |
| t | 0,568675503 | 0           | 1,002120823 | 2,993947561 | 8,963722 | 11,9913719  | 143,793 | 0,295165911 | 0,598918449 | 0,711864577 |
| t | 0,338065255 | 0           | 1,232731072 | 2,259927211 | 5,107271 | 11,7657129  | 138,432 | 0,288121966 | 0,626300073 | 0,725468069 |



|            |            |            |   |   |   |   |    |   |   |   |
|------------|------------|------------|---|---|---|---|----|---|---|---|
| 203,981995 | 3,2035296  | 41608,6541 | 0 | 0 | 0 | 0 | 3  | 0 | 0 | 0 |
| 172,664993 | 2,3168118  | 29813,1999 | 0 | 0 | 0 | 0 | 0  | 0 | 0 | 0 |
| 172,664993 | 2,3168118  | 29813,1999 | 3 | 0 | 0 | 0 | 4  | 0 | 0 | 0 |
| 172,664993 | 2,3168118  | 29813,1999 | 2 | 0 | 0 | 0 | 0  | 0 | 0 | 0 |
| 182,330002 | 3,99195743 | 33244,2296 | 1 | 0 | 0 | 0 | 1  | 0 | 0 | 0 |
| 200,115997 | 1,5913744  | 40046,4124 | 1 | 0 | 0 | 0 | 0  | 2 | 0 | 0 |
| 202,395996 | 3,896456   | 40964,1392 | 2 | 0 | 0 | 0 | 0  | 0 | 0 | 0 |
| 199,893997 | 2,94144225 | 39957,6101 | 3 | 0 | 0 | 0 | 1  | 0 | 0 | 0 |
| 206,283005 | 4,21770668 | 42552,6781 | 0 | 0 | 0 | 0 | 7  | 0 | 1 | 0 |
| 201,414001 | 5,18400049 | 40567,6    | 0 | 0 | 0 | 0 | 0  | 1 | 1 | 0 |
| 198,320999 | 4,96076584 | 39331,2187 | 1 | 0 | 0 | 0 | 0  | 0 | 0 | 0 |
| 197,130997 | 2,88891649 | 38860,6299 | 1 | 0 | 0 | 0 | 0  | 0 | 0 | 0 |
| 197,130997 | 2,88891649 | 38860,6299 | 0 | 0 | 0 | 0 | 0  | 0 | 0 | 0 |
| 189,279007 | 4,93326044 | 35826,5425 | 0 | 0 | 0 | 0 | 0  | 0 | 0 | 0 |
| 215,285995 | 9,61058903 | 46348,0599 | 0 | 0 | 0 | 1 | 15 | 0 | 0 | 0 |
| 219,761002 | 3,18425012 | 48294,8978 | 0 | 0 | 0 | 0 | 28 | 0 | 0 | 0 |
| 190,526993 | 9,21511841 | 36300,535  | 1 | 0 | 0 | 0 | 0  | 1 | 0 | 0 |
| 213,667999 | 5,41120338 | 45654,0139 | 0 | 0 | 0 | 0 | 19 | 0 | 0 | 0 |
| 206,283005 | 4,21770668 | 42552,6781 | 0 | 0 | 0 | 0 | 3  | 0 | 1 | 0 |
| 206,283005 | 4,21770668 | 42552,6781 | 0 | 0 | 0 | 0 | 2  | 0 | 0 | 0 |
| 187,335007 | 4,98556948 | 35094,4047 | 0 | 0 | 0 | 0 | 0  | 0 | 0 | 0 |
| 208,492996 | 6,05411863 | 43469,3295 | 0 | 0 | 0 | 0 | 4  | 0 | 0 | 4 |
| 238,309006 | 2,30327892 | 56791,1822 | 1 | 0 | 0 | 0 | 13 | 0 | 0 | 0 |
| 204,688004 | 4,04349232 | 41897,1788 | 0 | 0 | 0 | 0 | 0  | 0 | 0 | 0 |
| 203,184006 | 0,40588084 | 41283,7402 | 1 | 0 | 0 | 0 | 0  | 0 | 0 | 0 |
| 208,927002 | 2,75998974 | 43650,4921 | 0 | 0 | 0 | 1 | 1  | 0 | 0 | 0 |
| 208,927002 | 2,75998974 | 43650,4921 | 1 | 0 | 0 | 0 | 2  | 1 | 0 | 4 |
| 208,927002 | 2,75998974 | 43650,4921 | 0 | 0 | 0 | 0 | 0  | 0 | 0 | 0 |
| 205,656006 | 3,91106772 | 42294,3927 | 1 | 0 | 0 | 0 | 0  | 0 | 0 | 0 |

|            |            |            |   |   |   |   |    |   |   |   |
|------------|------------|------------|---|---|---|---|----|---|---|---|
| 232,119995 | 4,24366522 | 53879,6921 | 0 | 0 | 0 | 0 | 5  | 0 | 0 | 0 |
| 229,201004 | 5,24939203 | 52533,1002 | 0 | 0 | 0 | 0 | 1  | 0 | 0 | 0 |
| 239,889008 | 5,73266125 | 57546,736  | 0 | 0 | 0 | 0 | 3  | 0 | 0 | 0 |
| 239,276993 | 3,75033903 | 57253,4793 | 1 | 0 | 0 | 0 | 1  | 0 | 0 | 0 |
| 228,798996 | 2,89311862 | 52348,9806 | 0 | 0 | 0 | 0 | 0  | 0 | 0 | 0 |
| 213,628998 | 3,37332082 | 45637,3487 | 0 | 0 | 0 | 0 | 0  | 0 | 0 | 0 |
| 216,052002 | 1,71652126 | 46678,4675 | 1 | 0 | 0 | 1 | 0  | 0 | 1 | 0 |
| 187,600998 | 5,10250187 | 35194,1344 | 2 | 0 | 0 | 0 | 0  | 0 | 0 | 0 |
| 185,572998 | 5,19020128 | 34437,3376 | 0 | 0 | 0 | 0 | 0  | 0 | 0 | 0 |
| 202,192993 | 5,46809387 | 40882,0065 | 1 | 0 | 0 | 0 | 0  | 0 | 0 | 0 |
| 207,966995 | 1,83690071 | 43250,2711 | 1 | 0 | 0 | 0 | 0  | 0 | 0 | 0 |
| 211,742996 | 5,19020128 | 44835,0964 | 1 | 0 | 0 | 0 | 0  | 0 | 0 | 0 |
| 205,968994 | 3,42888141 | 42423,2265 | 0 | 0 | 0 | 0 | 0  | 0 | 0 | 0 |
| 205,968994 | 3,42888141 | 42423,2265 | 1 | 0 | 0 | 0 | 0  | 0 | 0 | 0 |
| 205,968994 | 3,42888141 | 42423,2265 | 1 | 0 | 0 | 0 | 1  | 0 | 0 | 0 |
| 207,018997 | 6,1612711  | 42856,8652 | 1 | 0 | 0 | 0 | 0  | 0 | 0 | 0 |
| 202,593994 | 6,32710266 | 41044,3265 | 1 | 0 | 0 | 0 | 0  | 0 | 0 | 0 |
| 200,753006 | 8,99873257 | 40301,7694 | 1 | 0 | 0 | 0 | 0  | 0 | 0 | 0 |
| 200,815002 | 7,69833803 | 40326,6652 | 2 | 0 | 0 | 0 | 0  | 0 | 0 | 0 |
| 202,748001 | 0,45253745 | 41106,7519 | 1 | 0 | 0 | 0 | 0  | 0 | 0 | 0 |
| 199,740005 | 6,58541679 | 39896,0698 | 0 | 0 | 0 | 0 | 0  | 0 | 0 | 0 |
| 216,671997 | 13,7767553 | 46946,7543 | 0 | 0 | 0 | 0 | 5  | 0 | 0 | 0 |
| 204,936005 | 11,6847296 | 41998,766  | 0 | 0 | 0 | 1 | 0  | 0 | 0 | 0 |
| 190,309998 | 0,98405397 | 36217,8952 | 0 | 0 | 0 | 0 | 10 | 0 | 0 | 0 |
| 213,628998 | 3,37332082 | 45637,3487 | 1 | 0 | 0 | 0 | 0  | 0 | 0 | 0 |
| 213,628998 | 3,37332082 | 45637,3487 | 1 | 0 | 0 | 0 | 0  | 0 | 0 | 0 |
| 227,570007 | 4,8374691  | 51788,1082 | 3 | 0 | 0 | 0 | 0  | 0 | 0 | 0 |
| 228,563995 | 5,24716043 | 52241,5    | 0 | 0 | 0 | 0 | 4  | 0 | 0 | 0 |
| 186,725998 | 9,37584782 | 34866,5983 | 0 | 0 | 0 | 0 | 1  | 0 | 0 | 0 |

|            |            |            |   |   |   |   |    |   |   |   |
|------------|------------|------------|---|---|---|---|----|---|---|---|
| 186,132996 | 5,7697525  | 34645,4921 | 3 | 0 | 0 | 0 | 0  | 0 | 1 | 0 |
| 198,972    | 3,6967628  | 39589,8568 | 2 | 0 | 0 | 0 | 0  | 0 | 0 | 0 |
| 189,979996 | 4,53758192 | 36092,3988 | 4 | 0 | 0 | 0 | 1  | 0 | 1 | 1 |
| 197,947006 | 4,45584822 | 39183,0173 | 1 | 0 | 0 | 0 | 0  | 0 | 0 | 0 |
| 190,309998 | 0,98405397 | 36217,8952 | 0 | 0 | 0 | 0 | 7  | 0 | 0 | 0 |
| 190,309998 | 0,98405397 | 36217,8952 | 0 | 0 | 0 | 0 | 7  | 0 | 0 | 1 |
| 219,936996 | 17,6746464 | 48372,2824 | 0 | 0 | 0 | 0 | 4  | 0 | 0 | 0 |
| 195,395004 | 1,89749289 | 38179,2077 | 0 | 0 | 0 | 0 | 14 | 0 | 0 | 1 |
| 223,261993 | 3,62277651 | 49845,9177 | 1 | 0 | 0 | 0 | 0  | 0 | 0 | 0 |
| 211,164001 | 3,46669984 | 44590,2355 | 0 | 0 | 0 | 0 | 1  | 0 | 0 | 0 |
| 223,304001 | 3,20456195 | 49864,6768 | 1 | 0 | 0 | 0 | 0  | 0 | 0 | 0 |
| 227,697006 | 3,58859921 | 51845,9266 | 1 | 0 | 0 | 0 | 1  | 0 | 0 | 0 |
| 222,432007 | 2,7064302  | 49475,9977 | 0 | 0 | 0 | 0 | 0  | 0 | 0 | 0 |
| 213,406006 | 11,6425362 | 45542,1233 | 0 | 0 | 0 | 0 | 11 | 1 | 0 | 0 |
| 209,218994 | 12,1474915 | 43772,5875 | 0 | 0 | 0 | 0 | 1  | 0 | 0 | 0 |
| 219,488007 | 12,7875443 | 48174,985  | 0 | 0 | 0 | 0 | 4  | 0 | 0 | 0 |
| 196,990005 | 7,51707888 | 38805,0623 | 0 | 0 | 0 | 0 | 0  | 0 | 0 | 0 |
| 195,389999 | 3,68668389 | 38177,2519 | 1 | 0 | 0 | 0 | 1  | 0 | 0 | 0 |
| 198,106003 | 2,65175486 | 39245,9883 | 0 | 0 | 0 | 0 | 1  | 0 | 0 | 0 |
| 202,953003 | 1,37919116 | 41189,9214 | 0 | 0 | 0 | 0 | 0  | 4 | 0 | 0 |
| 201,253998 | 3,74487209 | 40503,1716 | 1 | 0 | 0 | 0 | 18 | 0 | 0 | 0 |
| 197,130997 | 2,88891649 | 38860,6299 | 1 | 0 | 0 | 0 | 2  | 0 | 0 | 0 |
| 197,947006 | 4,45584822 | 39183,0173 | 2 | 0 | 0 | 0 | 0  | 0 | 0 | 0 |
| 197,947006 | 4,45584822 | 39183,0173 | 1 | 0 | 0 | 0 | 0  | 0 | 0 | 0 |
| 188,046005 | 8,35789871 | 35361,3001 | 0 | 0 | 0 | 0 | 0  | 0 | 7 | 0 |
| 216,839005 | 2,98496366 | 47019,1539 | 1 | 0 | 0 | 0 | 4  | 0 | 0 | 0 |
| 216,839005 | 2,98496366 | 47019,1539 | 1 | 0 | 0 | 0 | 0  | 0 | 0 | 0 |
| 216,839005 | 2,98496366 | 47019,1539 | 2 | 0 | 0 | 0 | 2  | 0 | 0 | 0 |
| 216,044006 | 2,93639183 | 46675,0127 | 2 | 0 | 0 | 1 | 1  | 0 | 2 | 0 |



|            |            |            |   |   |   |   |     |   |   |   |
|------------|------------|------------|---|---|---|---|-----|---|---|---|
| 217,994003 | 6,69703388 | 47521,3855 | 0 | 0 | 0 | 0 | 1   | 0 | 0 | 0 |
| 207,751007 | 6,34067774 | 43160,4809 | 0 | 0 | 0 | 0 | 3   | 0 | 0 | 1 |
| 210,529007 | 11,7771263 | 44322,4628 | 0 | 0 | 0 | 0 | 36  | 5 | 0 | 0 |
| 207,485001 | 9,53657627 | 43050,0255 | 0 | 0 | 0 | 1 | 71  | 4 | 0 | 0 |
| 207,923004 | 5,78623724 | 43231,9757 | 0 | 0 | 0 | 0 | 83  | 0 | 0 | 0 |
| 219,569    | 11,9856195 | 48210,5459 | 0 | 0 | 0 | 2 | 34  | 0 | 0 | 0 |
| 214,669998 | 6,50197458 | 46083,2081 | 0 | 0 | 0 | 1 | 110 | 0 | 0 | 0 |
| 214,705002 | 8,78650856 | 46098,2378 | 1 | 0 | 0 | 2 | 72  | 0 | 0 | 0 |
| 218,197006 | 5,71480227 | 47609,9335 | 0 | 0 | 0 | 1 | 46  | 0 | 0 | 0 |
| 218,197006 | 5,71480227 | 47609,9335 | 0 | 0 | 0 | 0 | 44  | 0 | 0 | 1 |
| 218,197006 | 5,71480227 | 47609,9335 | 0 | 0 | 0 | 2 | 35  | 1 | 0 | 0 |
| 217,757996 | 7,41054964 | 47418,5447 | 0 | 0 | 0 | 1 | 68  | 0 | 0 | 0 |
| 214,528    | 8,55254269 | 46022,2627 | 0 | 0 | 0 | 1 | 59  | 1 | 0 | 1 |
| 214,072998 | 15,3001471 | 45827,2485 | 0 | 0 | 0 | 0 | 48  | 0 | 0 | 0 |
| 210,274994 | 1,14097619 | 44215,5731 | 0 | 0 | 0 | 0 | 2   | 0 | 0 | 2 |
| 202,033997 | 4,68792391 | 40817,7358 | 0 | 0 | 0 | 0 | 6   | 1 | 0 | 2 |
| 202,033997 | 4,68792391 | 40817,7358 | 0 | 0 | 0 | 0 | 19  | 0 | 0 | 0 |
| 202,033997 | 4,68792391 | 40817,7358 | 0 | 0 | 0 | 0 | 20  | 0 | 0 | 0 |
| 208,292007 | 1,00787044 | 43385,5604 | 0 | 0 | 0 | 0 | 1   | 0 | 0 | 3 |
| 209,873993 | 8,23126316 | 44047,0929 | 0 | 0 | 0 | 0 | 3   | 0 | 0 | 0 |
| 192,876007 | 1,80304754 | 37201,1541 | 0 | 0 | 0 | 0 | 2   | 0 | 0 | 1 |
| 190,203003 | 8,42102242 | 36177,1823 | 0 | 0 | 0 | 0 | 0   | 0 | 0 | 0 |
| 202,436005 | 6,25056505 | 40980,336  | 0 | 0 | 0 | 0 | 4   | 0 | 0 | 5 |
| 208,238998 | 13,9718513 | 43363,4805 | 0 | 0 | 0 | 0 | 14  | 0 | 0 | 2 |
| 220,423004 | 5,24600983 | 48586,3008 | 0 | 0 | 0 | 1 | 48  | 0 | 0 | 0 |
| 219,514999 | 4,9455018  | 48186,835  | 0 | 0 | 0 | 9 | 54  | 0 | 0 | 0 |
| 218,031006 | 3,40484715 | 47537,5195 | 0 | 0 | 0 | 0 | 41  | 0 | 0 | 0 |
| 219,121002 | 9,13948154 | 48014,0136 | 0 | 0 | 0 | 0 | 0   | 0 | 0 | 0 |
| 221,798996 | 13,6327744 | 49194,7946 | 0 | 0 | 0 | 0 | 40  | 0 | 0 | 0 |



|            |            |            |   |   |   |   |    |   |   |   |
|------------|------------|------------|---|---|---|---|----|---|---|---|
| 217,005005 | 15,4830513 | 47091,1721 | 0 | 0 | 0 | 2 | 62 | 0 | 0 | 0 |
| 220,960007 | 9,4705534  | 48823,3246 | 0 | 0 | 0 | 0 | 0  | 0 | 0 | 0 |
| 220,960007 | 9,4705534  | 48823,3246 | 1 | 0 | 0 | 0 | 0  | 0 | 0 | 0 |
| 220,960007 | 9,4705534  | 48823,3246 | 0 | 0 | 0 | 0 | 1  | 0 | 0 | 0 |
| 221,406006 | 7,42991686 | 49020,6194 | 0 | 0 | 0 | 0 | 0  | 0 | 0 | 0 |
| 222,117996 | 6,00703669 | 49336,4042 | 0 | 0 | 0 | 0 | 0  | 0 | 0 | 0 |
| 221,520004 | 9,7508812  | 49071,1123 | 0 | 0 | 0 | 0 | 2  | 0 | 0 | 0 |
| 223,445999 | 1,69746602 | 49928,1145 | 0 | 0 | 0 | 0 | 1  | 0 | 0 | 0 |
| 222,218994 | 4,65001583 | 49381,2814 | 0 | 0 | 0 | 0 | 0  | 0 | 0 | 0 |
| 223,255997 | 6,77582264 | 49843,2401 | 0 | 0 | 0 | 0 | 0  | 0 | 0 | 0 |
| 217,319    | 6,57768059 | 47227,5479 | 0 | 0 | 0 | 1 | 0  | 0 | 0 | 0 |
| 212,584    | 1,5454694  | 45191,9569 | 0 | 0 | 0 | 4 | 0  | 0 | 0 | 0 |
| 212,584    | 1,5454694  | 45191,9569 | 0 | 0 | 0 | 0 | 0  | 0 | 0 | 0 |
| 212,584    | 1,5454694  | 45191,9569 | 0 | 0 | 0 | 1 | 0  | 0 | 0 | 0 |
| 220,651993 | 4,32939577 | 48687,3019 | 0 | 0 | 0 | 2 | 2  | 0 | 0 | 0 |
| 223,824005 | 5,6856451  | 50097,1853 | 0 | 0 | 0 | 0 | 0  | 0 | 0 | 0 |
| 219,069    | 3,44797778 | 47991,2269 | 0 | 0 | 0 | 0 | 3  | 0 | 0 | 0 |
| 228,634995 | 3,64539576 | 52273,9607 | 0 | 0 | 0 | 0 | 0  | 0 | 0 | 0 |
| 212,238007 | 6,39938784 | 45044,9714 | 0 | 0 | 0 | 1 | 41 | 0 | 0 | 0 |
| 225,794006 | 4,37882996 | 50982,9333 | 0 | 0 | 0 | 0 | 6  | 0 | 0 | 0 |
| 227,845993 | 6,24189568 | 51913,7965 | 0 | 0 | 0 | 2 | 31 | 0 | 0 | 0 |
| 221,876007 | 9,16154194 | 49228,9625 | 0 | 0 | 0 | 2 | 66 | 0 | 0 | 0 |
| 221,876007 | 9,16154194 | 49228,9625 | 0 | 0 | 0 | 1 | 64 | 0 | 0 | 0 |
| 221,876007 | 9,16154194 | 49228,9625 | 0 | 0 | 0 | 0 | 64 | 0 | 0 | 0 |
| 227,763    | 12,0273266 | 51875,9844 | 0 | 0 | 0 | 0 | 34 | 0 | 0 | 0 |
| 250,218002 | 4,96440697 | 62609,0487 | 0 | 0 | 0 | 0 | 21 | 0 | 0 | 0 |
| 217,231003 | 6,59781837 | 47189,3086 | 0 | 0 | 0 | 1 | 60 | 0 | 0 | 0 |
| 230,229004 | 6,77903843 | 53005,3942 | 0 | 0 | 0 | 0 | 38 | 0 | 0 | 0 |
| 226,651001 | 2,91751981 | 51370,6762 | 0 | 0 | 0 | 1 | 20 | 0 | 0 | 0 |



|            |            |            |   |   |   |   |    |   |   |   |
|------------|------------|------------|---|---|---|---|----|---|---|---|
| 218,535004 | 8,16400337 | 47757,5478 | 0 | 0 | 0 | 0 | 0  | 0 | 0 | 0 |
| 222,050003 | 1,2858305  | 49306,2039 | 0 | 0 | 0 | 0 | 6  | 0 | 0 | 0 |
| 224,796005 | 4,68142176 | 50533,244  | 0 | 0 | 0 | 0 | 0  | 0 | 0 | 0 |
| 221,302002 | 5,56569052 | 48974,5761 | 0 | 0 | 0 | 1 | 2  | 0 | 0 | 0 |
| 220,738007 | 7,98773479 | 48725,2676 | 0 | 0 | 0 | 0 | 0  | 0 | 0 | 0 |
| 220,738007 | 7,98773479 | 48725,2676 | 0 | 0 | 0 | 0 | 0  | 0 | 0 | 0 |
| 220,738007 | 7,98773479 | 48725,2676 | 0 | 0 | 0 | 4 | 3  | 0 | 0 | 0 |
| 223,266998 | 2,94144225 | 49848,1525 | 0 | 0 | 0 | 0 | 0  | 0 | 0 | 0 |
| 215,479004 | 4,99701738 | 46431,2011 | 0 | 0 | 0 | 0 | 3  | 0 | 0 | 0 |
| 222,848007 | 4,86610174 | 49661,2343 | 0 | 0 | 0 | 0 | 0  | 0 | 0 | 0 |
| 214,235992 | 3,18274879 | 45897,0605 | 0 | 0 | 0 | 0 | 12 | 0 | 0 | 0 |
| 217,035004 | 1,38901448 | 47104,1928 | 0 | 0 | 0 | 0 | 1  | 0 | 0 | 0 |
| 217,386993 | 1,40705359 | 47257,1049 | 0 | 0 | 0 | 0 | 0  | 0 | 0 | 0 |
| 220,395996 | 3,50306392 | 48574,3951 | 0 | 0 | 0 | 1 | 2  | 0 | 0 | 0 |
| 217,891998 | 0,73728812 | 47476,9229 | 0 | 0 | 0 | 0 | 2  | 0 | 0 | 0 |
| 217,891998 | 0,73728812 | 47476,9229 | 0 | 0 | 0 | 0 | 6  | 0 | 0 | 0 |
| 217,891998 | 0,73728812 | 47476,9229 | 0 | 0 | 0 | 0 | 4  | 0 | 0 | 0 |
| 215,966003 | 2,7058723  | 46641,3146 | 0 | 0 | 0 | 0 | 1  | 0 | 0 | 0 |
| 216,770996 | 5,62821436 | 46989,6647 | 0 | 0 | 0 | 0 | 5  | 0 | 0 | 0 |
| 215,994995 | 3,13881183 | 46653,8379 | 0 | 0 | 0 | 0 | 11 | 0 | 0 | 0 |
| 214,401993 | 4,48291254 | 45968,2145 | 1 | 0 | 0 | 0 | 0  | 0 | 0 | 0 |
| 215,050003 | 3,97843599 | 46246,5038 | 1 | 0 | 0 | 0 | 12 | 0 | 0 | 0 |
| 215,445007 | 3,77585149 | 46416,5512 | 2 | 0 | 0 | 0 | 5  | 0 | 0 | 0 |
| 210,763    | 1,56940591 | 44421,0424 | 1 | 0 | 0 | 0 | 14 | 0 | 0 | 0 |
| 214,809998 | 4,58489227 | 46143,3351 | 1 | 0 | 0 | 0 | 12 | 0 | 0 | 0 |
| 214,809998 | 4,58489227 | 46143,3351 | 1 | 0 | 0 | 0 | 19 | 1 | 0 | 0 |
| 214,809998 | 4,58489227 | 46143,3351 | 0 | 0 | 0 | 0 | 4  | 0 | 0 | 0 |
| 216,065002 | 3,57175136 | 46684,0853 | 0 | 0 | 0 | 0 | 0  | 0 | 0 | 0 |
| 209,330002 | 4,98994684 | 43819,0497 | 0 | 0 | 0 | 0 | 5  | 0 | 2 | 0 |

|            |            |            |   |   |   |   |   |   |   |   |
|------------|------------|------------|---|---|---|---|---|---|---|---|
| 211,772995 | 3,46351647 | 44847,8014 | 1 | 0 | 0 | 0 | 0 | 0 | 0 | 0 |
| 191,809998 | 5,61520529 | 36791,0752 | 3 | 0 | 0 | 0 | 1 | 0 | 0 | 0 |
| 211,399002 | 3,06150126 | 44689,5381 | 2 | 0 | 0 | 0 | 6 | 0 | 0 | 0 |
| 215,255005 | 3,86367345 | 46334,7171 | 1 | 0 | 0 | 0 | 1 | 1 | 0 | 0 |
| 211,378998 | 6,05411863 | 44681,0807 | 1 | 0 | 0 | 0 | 0 | 0 | 0 | 0 |
| 212,468002 | 4,05880833 | 45142,652  | 1 | 0 | 0 | 0 | 0 | 0 | 0 | 2 |
| 212,468002 | 4,05880833 | 45142,652  | 1 | 0 | 0 | 0 | 2 | 0 | 0 | 0 |
| 212,468002 | 4,05880833 | 45142,652  | 0 | 0 | 0 | 0 | 3 | 0 | 0 | 0 |
| 191,177002 | 2,46013498 | 36548,6461 | 3 | 0 | 0 | 0 | 0 | 0 | 0 | 0 |
| 189,175995 | 5,61520529 | 35787,557  | 3 | 0 | 0 | 0 | 0 | 0 | 0 | 0 |
| 191,559006 | 5,15352726 | 36694,8527 | 2 | 0 | 0 | 0 | 0 | 0 | 0 | 0 |
| 220,692001 | 2,34071088 | 48704,9595 | 1 | 0 | 0 | 0 | 0 | 0 | 0 | 0 |
| 175,748993 | 12,3170195 | 30887,7085 | 0 | 0 | 0 | 0 | 3 | 0 | 0 | 4 |
| 192,401001 | 3,72057438 | 37018,1452 | 1 | 0 | 0 | 0 | 8 | 0 | 0 | 0 |
| 190,707001 | 5,35762691 | 36369,1601 | 1 | 0 | 0 | 0 | 0 | 1 | 0 | 0 |
| 206,681    | 3,50681043 | 42717,0357 | 3 | 0 | 0 | 0 | 0 | 1 | 0 | 0 |
| 206,681    | 3,50681043 | 42717,0357 | 2 | 0 | 0 | 0 | 4 | 0 | 0 | 0 |
| 206,681    | 3,50681043 | 42717,0357 | 3 | 0 | 0 | 0 | 0 | 0 | 0 | 0 |
| 220,951996 | 2,91751981 | 48819,7845 | 2 | 0 | 0 | 0 | 0 | 0 | 0 | 0 |
| 219,695007 | 2,91288471 | 48265,8962 | 1 | 0 | 0 | 0 | 0 | 0 | 0 | 0 |
| 218,227005 | 4,36547375 | 47623,0257 | 0 | 0 | 0 | 0 | 0 | 0 | 0 | 0 |
| 200,074005 | 1,3266505  | 40029,6075 | 0 | 0 | 0 | 0 | 1 | 0 | 0 | 0 |
| 219,824005 | 0,91079658 | 48322,5932 | 3 | 0 | 0 | 0 | 0 | 0 | 0 | 0 |
| 218,130005 | 4,23252535 | 47580,699  | 1 | 0 | 0 | 0 | 4 | 0 | 0 | 0 |
| 212,643005 | 1,41819537 | 45217,0477 | 1 | 0 | 0 | 0 | 0 | 0 | 0 | 0 |
| 187,257004 | 4,43221903 | 35065,1855 | 3 | 0 | 0 | 0 | 1 | 0 | 0 | 0 |
| 187,257004 | 4,43221903 | 35065,1855 | 0 | 0 | 0 | 2 | 0 | 0 | 0 | 0 |
| 187,257004 | 4,43221903 | 35065,1855 | 2 | 0 | 0 | 0 | 0 | 1 | 0 | 0 |
| 198,076004 | 3,30116415 | 39234,1034 | 2 | 0 | 0 | 0 | 1 | 1 | 0 | 0 |

|            |            |            |   |   |   |   |   |   |   |   |
|------------|------------|------------|---|---|---|---|---|---|---|---|
| 207,707001 | 2,24587393 | 43142,1982 | 1 | 0 | 0 | 1 | 0 | 0 | 0 | 0 |
| 200,279007 | 3,62277651 | 40111,6806 | 3 | 0 | 1 | 0 | 0 | 0 | 0 | 0 |
| 194,341995 | 1,82159317 | 37768,8111 | 0 | 0 | 0 | 0 | 0 | 0 | 0 | 0 |
| 194,335999 | 4,98259306 | 37766,4803 | 3 | 0 | 0 | 0 | 3 | 0 | 0 | 0 |
| 194,690994 | 4,92901707 | 37904,5832 | 1 | 0 | 0 | 0 | 0 | 2 | 0 | 0 |
| 195,932999 | 4,7511034  | 38389,74   | 3 | 0 | 0 | 0 | 0 | 0 | 0 | 0 |
| 205,360001 | 1,76949155 | 42172,7299 | 2 | 0 | 0 | 0 | 0 | 0 | 0 | 0 |
| 205,360001 | 1,76949155 | 42172,7299 | 2 | 0 | 0 | 0 | 0 | 0 | 0 | 0 |
| 205,360001 | 1,76949155 | 42172,7299 | 2 | 0 | 0 | 1 | 0 | 1 | 0 | 0 |
| 199,093002 | 5,57630587 | 39638,0236 | 1 | 0 | 0 | 0 | 0 | 5 | 0 | 0 |
| 199,197998 | 3,03598881 | 39679,8424 | 2 | 0 | 0 | 0 | 0 | 8 | 0 | 0 |
| 184,220993 | 11,5899687 | 33937,3743 | 2 | 0 | 0 | 0 | 0 | 0 | 0 | 0 |
| 185,074997 | 5,19192743 | 34252,7545 | 1 | 0 | 0 | 0 | 1 | 2 | 0 | 0 |
| 188,511002 | 5,13894844 | 35536,3977 | 1 | 0 | 0 | 0 | 0 | 1 | 1 | 0 |
| 175,445999 | 5,98181677 | 30781,2986 | 2 | 0 | 0 | 0 | 1 | 2 | 0 | 0 |
| 213,906998 | 2,42257929 | 45756,2037 | 1 | 0 | 0 | 0 | 0 | 4 | 0 | 0 |
| 213,906998 | 2,42257929 | 45756,2037 | 2 | 0 | 0 | 0 | 1 | 0 | 0 | 0 |
| 213,906998 | 2,42257929 | 45756,2037 | 1 | 0 | 0 | 0 | 0 | 0 | 0 | 0 |
| 209,291    | 5,00712824 | 43802,7228 | 1 | 0 | 0 | 0 | 0 | 1 | 0 | 0 |
| 192,304001 | 3,01047611 | 36980,8287 | 1 | 0 | 0 | 0 | 0 | 0 | 0 | 0 |
| 187,526993 | 3,34851694 | 35166,373  | 4 | 0 | 0 | 0 | 0 | 1 | 0 | 0 |
| 191,011002 | 3,53707433 | 36485,2027 | 1 | 0 | 0 | 0 | 1 | 0 | 0 | 0 |
| 210,897003 | 4,6075592  | 44477,5459 | 0 | 0 | 0 | 0 | 2 | 0 | 0 | 0 |
| 192,438004 | 4,43763065 | 37032,3852 | 2 | 0 | 0 | 0 | 3 | 3 | 0 | 0 |
| 196,916    | 2,75838232 | 38775,9112 | 0 | 0 | 0 | 0 | 0 | 1 | 0 | 0 |
| 195,667999 | 5,30350971 | 38285,9659 | 1 | 0 | 0 | 0 | 0 | 1 | 0 | 0 |
| 195,667999 | 5,30350971 | 38285,9659 | 2 | 0 | 0 | 0 | 1 | 1 | 0 | 0 |
| 195,667999 | 5,30350971 | 38285,9659 | 2 | 0 | 0 | 0 | 0 | 1 | 0 | 0 |
| 202,003006 | 4,20956421 | 40805,2144 | 1 | 0 | 0 | 0 | 0 | 0 | 0 | 0 |

|            |            |            |   |   |   |   |    |   |    |   |
|------------|------------|------------|---|---|---|---|----|---|----|---|
| 209,304001 | 3,50102377 | 43808,1648 | 2 | 0 | 0 | 0 | 0  | 1 | 0  | 0 |
| 213,266998 | 1,75586104 | 45482,8126 | 0 | 0 | 0 | 0 | 0  | 1 | 0  | 0 |
| 211,216003 | 5,51835585 | 44612,2001 | 1 | 0 | 0 | 0 | 0  | 0 | 0  | 0 |
| 219,593002 | 2,09334087 | 48221,0867 | 3 | 0 | 0 | 0 | 0  | 0 | 0  | 0 |
| 206,406006 | 5,83981371 | 42603,4393 | 1 | 1 | 0 | 0 | 0  | 0 | 0  | 9 |
| 205,589996 | 7,79291201 | 42267,2466 | 3 | 0 | 0 | 0 | 0  | 0 | 0  | 0 |
| 240,067993 | 4,6075592  | 57632,6413 | 0 | 0 | 0 | 0 | 0  | 1 | 0  | 0 |
| 240,067993 | 4,6075592  | 57632,6413 | 0 | 0 | 0 | 0 | 0  | 0 | 0  | 0 |
| 240,067993 | 4,6075592  | 57632,6413 | 0 | 0 | 0 | 0 | 1  | 0 | 0  | 0 |
| 216,615005 | 8,22585201 | 46922,0606 | 1 | 0 | 0 | 0 | 0  | 0 | 0  | 0 |
| 217,490997 | 6,341681   | 47302,3339 | 0 | 0 | 0 | 0 | 0  | 0 | 0  | 0 |
| 225,028    | 3,92539024 | 50637,6007 | 3 | 0 | 0 | 0 | 1  | 0 | 0  | 0 |
| 206,895004 | 3,57175136 | 42805,5428 | 1 | 0 | 0 | 0 | 0  | 0 | 0  | 0 |
| 230,128006 | 3,69312167 | 52958,8991 | 0 | 0 | 0 | 0 | 2  | 0 | 0  | 0 |
| 215,084    | 2,36365891 | 46261,1269 | 0 | 0 | 0 | 0 | 0  | 0 | 0  | 0 |
| 222,912003 | 3,39493203 | 49689,7609 | 1 | 0 | 0 | 0 | 0  | 1 | 0  | 0 |
| 198,063995 | 9,00081348 | 39229,3463 | 1 | 0 | 0 | 0 | 0  | 0 | 1  | 0 |
| 198,063995 | 9,00081348 | 39229,3463 | 0 | 0 | 0 | 0 | 7  | 1 | 10 | 0 |
| 198,063995 | 9,00081348 | 39229,3463 | 0 | 0 | 0 | 0 | 1  | 0 | 0  | 0 |
| 207,843002 | 7,83905458 | 43198,7136 | 0 | 0 | 0 | 0 | 22 | 0 | 0  | 0 |
| 228,341995 | 6,91133881 | 52140,0668 | 1 | 0 | 0 | 0 | 4  | 0 | 0  | 0 |
| 223,550003 | 4,98630619 | 49974,6039 | 0 | 0 | 0 | 0 | 2  | 0 | 0  | 0 |
| 227,477005 | 2,34715104 | 51745,7878 | 1 | 0 | 0 | 0 | 0  | 0 | 0  | 0 |
| 222,675995 | 1,40885746 | 49584,5987 | 1 | 0 | 0 | 0 | 2  | 0 | 0  | 0 |
| 225,011002 | 4,14457941 | 50629,9508 | 0 | 0 | 0 | 0 | 0  | 0 | 0  | 0 |
| 227,376007 | 4,44683027 | 51699,8486 | 0 | 0 | 0 | 0 | 4  | 0 | 0  | 0 |
| 219,608002 | 4,7623353  | 48227,6744 | 1 | 0 | 0 | 0 | 0  | 0 | 0  | 0 |
| 219,608002 | 4,7623353  | 48227,6744 | 0 | 0 | 0 | 0 | 0  | 0 | 0  | 0 |
| 218,994995 | 4,62226677 | 47958,8079 | 0 | 0 | 0 | 1 | 1  | 0 | 0  | 0 |

|            |            |            |   |   |   |   |    |   |   |   |
|------------|------------|------------|---|---|---|---|----|---|---|---|
| 223,149994 | 2,48940253 | 49795,9198 | 0 | 0 | 0 | 0 | 0  | 0 | 0 | 0 |
| 217,682007 | 5,64464283 | 47385,4561 | 1 | 0 | 0 | 1 | 0  | 0 | 0 | 0 |
| 227,656006 | 6,84892559 | 51827,257  | 0 | 0 | 0 | 0 | 0  | 0 | 0 | 0 |
| 229,912003 | 8,01230717 | 52859,5289 | 0 | 0 | 0 | 1 | 0  | 0 | 0 | 0 |
| 223,785995 | 6,3755765  | 50080,1718 | 1 | 0 | 0 | 3 | 0  | 0 | 0 | 0 |
| 223,677994 | 3,05434823 | 50031,8449 | 0 | 0 | 0 | 0 | 0  | 0 | 0 | 0 |
| 224,994003 | 5,40865231 | 50622,3015 | 0 | 0 | 0 | 0 | 0  | 0 | 0 | 0 |
| 224,994003 | 5,40865231 | 50622,3015 | 0 | 0 | 0 | 0 | 0  | 0 | 0 | 0 |
| 224,994003 | 5,40865231 | 50622,3015 | 0 | 0 | 0 | 0 | 0  | 0 | 0 | 0 |
| 233,636993 | 7,23279667 | 54586,2447 | 0 | 0 | 0 | 0 | 0  | 0 | 0 | 1 |
| 234,516006 | 6,75061035 | 54997,7573 | 0 | 0 | 0 | 1 | 0  | 0 | 0 | 0 |
| 231,169998 | 6,3755765  | 53439,5681 | 0 | 0 | 0 | 0 | 0  | 0 | 0 | 0 |
| 228,315002 | 10,5091915 | 52127,7403 | 0 | 0 | 0 | 1 | 0  | 0 | 0 | 0 |
| 238,785995 | 8,83732319 | 57018,7516 | 0 | 0 | 0 | 0 | 0  | 0 | 0 | 0 |
| 232,041    | 5,87278366 | 53843,0259 | 1 | 0 | 0 | 0 | 0  | 0 | 0 | 0 |
| 232,873993 | 4,90698576 | 54230,2966 | 0 | 0 | 0 | 3 | 0  | 0 | 0 | 0 |
| 233,320007 | 5,89830494 | 54438,2258 | 0 | 0 | 0 | 0 | 0  | 0 | 0 | 0 |
| 233,320007 | 5,89830494 | 54438,2258 | 0 | 0 | 0 | 0 | 0  | 0 | 0 | 4 |
| 233,320007 | 5,89830494 | 54438,2258 | 0 | 0 | 0 | 0 | 1  | 0 | 0 | 0 |
| 226,007004 | 7,92710114 | 51079,1658 | 0 | 0 | 0 | 0 | 0  | 0 | 0 | 0 |
| 230,238998 | 7,75035381 | 53009,9964 | 0 | 0 | 0 | 1 | 5  | 0 | 0 | 0 |
| 228,701996 | 6,92448044 | 52304,6029 | 0 | 0 | 0 | 0 | 0  | 0 | 0 | 0 |
| 232,257004 | 5,12264347 | 53943,3158 | 0 | 0 | 0 | 0 | 2  | 0 | 0 | 0 |
| 229,352997 | 3,77585149 | 52602,7972 | 0 | 0 | 0 | 0 | 5  | 0 | 0 | 0 |
| 236,095001 | 5,91360712 | 55740,8496 | 0 | 0 | 0 | 2 | 4  | 0 | 0 | 0 |
| 230,977005 | 4,7511034  | 53350,3768 | 0 | 0 | 0 | 0 | 10 | 0 | 0 | 0 |
| 231,427994 | 4,67479229 | 53558,9163 | 0 | 0 | 0 | 0 | 3  | 0 | 0 | 0 |
| 231,427994 | 4,67479229 | 53558,9163 | 0 | 0 | 0 | 0 | 0  | 0 | 0 | 0 |
| 231,427994 | 4,67479229 | 53558,9163 | 0 | 0 | 0 | 0 | 5  | 0 | 0 | 0 |

|            |            |            |   |   |   |   |    |   |   |   |
|------------|------------|------------|---|---|---|---|----|---|---|---|
| 235,468002 | 4,33967781 | 55445,1801 | 0 | 0 | 0 | 0 | 3  | 0 | 0 | 0 |
| 233,639008 | 4,97880507 | 54587,1859 | 0 | 0 | 0 | 0 | 0  | 0 | 0 | 1 |
| 228,567993 | 5,25459576 | 52243,3275 | 0 | 0 | 0 | 0 | 3  | 0 | 0 | 0 |
| 229,380997 | 6,32200003 | 52615,6416 | 0 | 0 | 0 | 0 | 2  | 0 | 0 | 0 |
| 231,220993 | 3,86632895 | 53463,1476 | 0 | 0 | 0 | 0 | 5  | 0 | 0 | 0 |
| 224,686996 | 5,30295753 | 50484,2464 | 0 | 0 | 0 | 0 | 2  | 0 | 0 | 0 |
| 231,287003 | 6,16938877 | 53493,6776 | 0 | 0 | 0 | 0 | 11 | 0 | 0 | 0 |
| 229,350998 | 5,55791235 | 52601,8802 | 0 | 0 | 0 | 1 | 23 | 0 | 0 | 0 |
| 229,350998 | 5,55791235 | 52601,8802 | 0 | 0 | 0 | 0 | 14 | 0 | 0 | 0 |
| 229,350998 | 5,55791235 | 52601,8802 | 0 | 0 | 0 | 0 | 33 | 0 | 0 | 0 |
| 239,298996 | 4,94150066 | 57264,0095 | 0 | 0 | 0 | 0 | 60 | 0 | 0 | 0 |
| 236,569    | 6,05411863 | 55964,8919 | 0 | 0 | 0 | 0 | 3  | 0 | 0 | 0 |
| 226,485992 | 4,28610182 | 51295,9048 | 0 | 0 | 0 | 0 | 5  | 0 | 0 | 0 |
| 230,740997 | 5,72530746 | 53241,4078 | 0 | 0 | 0 | 0 | 5  | 0 | 0 | 0 |
| 218,451004 | 13,7530842 | 47720,8412 | 0 | 0 | 0 | 0 | 1  | 0 | 0 | 0 |
| 234,029999 | 8,00991821 | 54770,0403 | 0 | 0 | 0 | 0 | 3  | 0 | 0 | 0 |
| 230,615997 | 6,64345741 | 53183,7382 | 0 | 0 | 0 | 0 | 2  | 0 | 0 | 0 |
| 235,804993 | 18,2916965 | 55603,9946 | 0 | 0 | 0 | 0 | 1  | 0 | 0 | 0 |
| 235,804993 | 18,2916965 | 55603,9946 | 0 | 0 | 0 | 0 | 1  | 0 | 0 | 0 |
| 235,804993 | 18,2916965 | 55603,9946 | 0 | 0 | 0 | 0 | 2  | 0 | 0 | 0 |
| 234,481003 | 8,51862717 | 54981,3407 | 0 | 0 | 0 | 0 | 10 | 0 | 0 | 0 |
| 220,328995 | 12,7052298 | 48544,8659 | 0 | 0 | 0 | 0 | 46 | 0 | 0 | 0 |
| 209,610001 | 10,0787048 | 43936,3524 | 0 | 0 | 0 | 0 | 0  | 0 | 0 | 0 |

|            |            |              |        |        |        |        |        |        |        |        |   |
|------------|------------|--------------|--------|--------|--------|--------|--------|--------|--------|--------|---|
| tmedium    | tcoarse    | tloi         | aglmac | alpheu | amaaus | antaur | aontri | aricid | armand | artbif |   |
| 0,50960509 | 0,00876538 | 1,1061433    |        | 1      | 0      | 0      | 0      | 3      | 2      | 0      | 0 |
| 0,48052227 | 0,00999867 | 0,99648527   |        | 0      | 0      | 0      | 0      | 4      | 5      | 0      | 0 |
| 0,49406935 |            | 0 1,06871792 |        | 1      | 0      | 0      | 1      | 0      | 0      | 0      | 0 |
| 0,50210769 |            | 0 0,94537453 |        | 0      | 0      | 0      | 0      | 0      | 6      | 0      | 0 |



|            |            |            |   |   |   |   |    |    |   |   |
|------------|------------|------------|---|---|---|---|----|----|---|---|
| 0,50680076 | 0,00907812 | 0,93246619 | 0 | 0 | 0 | 0 | 1  | 3  | 0 | 0 |
| 0,49282318 | 0          | 0,98836415 | 0 | 0 | 0 | 0 | 1  | 11 | 0 | 0 |
| 0,49282318 | 0          | 0,98836415 | 1 | 0 | 0 | 0 | 1  | 9  | 0 | 0 |
| 0,49282318 | 0          | 0,98836415 | 0 | 0 | 0 | 0 | 6  | 7  | 0 | 0 |
| 0,54431704 | 0,01645036 | 0,97055628 | 1 | 0 | 0 | 0 | 0  | 3  | 0 | 0 |
| 0,472282   | 0,0089332  | 0,89354513 | 0 | 0 | 0 | 0 | 2  | 2  | 0 | 0 |
| 0,27193498 | 0          | 2,1677456  | 0 | 0 | 0 | 2 | 0  | 0  | 0 | 0 |
| 0,34672999 | 0          | 1,27977811 | 0 | 0 | 0 | 7 | 0  | 0  | 0 | 2 |
| 0,30022718 | 0          | 1,93930503 | 0 | 0 | 0 | 0 | 0  | 0  | 0 | 0 |
| 0,28882631 | 0          | 1,96069579 | 0 | 0 | 0 | 2 | 0  | 1  | 0 | 0 |
| 0,24089547 | 0          | 2,1862923  | 0 | 0 | 0 | 0 | 0  | 1  | 0 | 0 |
| 0,20739519 | 0          | 2,24000536 | 0 | 0 | 0 | 4 | 0  | 0  | 0 | 0 |
| 0,20739519 | 0          | 2,24000536 | 0 | 0 | 0 | 8 | 0  | 1  | 0 | 0 |
| 0,20739519 | 0          | 2,24000536 | 0 | 0 | 0 | 1 | 0  | 1  | 0 | 0 |
| 0,30882947 | 0          | 1,38489602 | 0 | 0 | 0 | 4 | 0  | 1  | 0 | 0 |
| 0,30059485 | 0          | 2,02152987 | 0 | 0 | 0 | 7 | 0  | 0  | 0 | 0 |
| 0,48221753 | 0,0106974  | 0,94549357 | 1 | 0 | 0 | 0 | 2  | 8  | 0 | 0 |
| 0,49986077 | 0,13753258 | 0,96093553 | 0 | 0 | 0 | 2 | 28 | 1  | 0 | 0 |
| 0,48535943 | 0,0100739  | 0,91153925 | 1 | 0 | 0 | 4 | 0  | 1  | 0 | 0 |
| 0,50130347 | 0          | 1,00306381 | 0 | 0 | 0 | 0 | 5  | 6  | 0 | 0 |
| 0,52021962 | 0,00908638 | 1,00822517 | 1 | 0 | 0 | 4 | 23 | 5  | 0 | 0 |
| 0,50933958 | 0          | 1,07746415 | 1 | 0 | 0 | 1 | 20 | 1  | 0 | 0 |
| 0,50933958 | 0          | 1,07746415 | 1 | 0 | 0 | 0 | 15 | 0  | 0 | 0 |
| 0,50933958 | 0          | 1,07746415 | 1 | 0 | 0 | 0 | 17 | 0  | 0 | 0 |
| 0,51658106 | 0,00881487 | 1,00659823 | 1 | 0 | 0 | 0 | 17 | 0  | 0 | 0 |
| 0,52574203 | 0,01376307 | 0,91594077 | 0 | 0 | 0 | 3 | 74 | 2  | 0 | 0 |
| 0,48794088 | 0,00788932 | 1,16565647 | 0 | 0 | 0 | 0 | 29 | 5  | 0 | 0 |
| 0,50255225 | 0,2648696  | 1,03560031 | 0 | 0 | 0 | 3 | 5  | 0  | 1 | 0 |
| 0,51993011 | 0,0110261  | 1,01524037 | 0 | 0 | 0 | 0 | 68 | 0  | 0 | 0 |

|            |            |            |   |   |   |    |    |   |   |   |
|------------|------------|------------|---|---|---|----|----|---|---|---|
| 0,47227571 | 0          | 1,14214404 | 0 | 0 | 0 | 0  | 77 | 0 | 0 | 0 |
| 0,56643279 | 0,19980888 | 1,07439192 | 1 | 0 | 0 | 1  | 21 | 1 | 0 | 0 |
| 0,55176821 | 0,30921784 | 1,24217229 | 0 | 0 | 0 | 4  | 26 | 0 | 0 | 1 |
| 0,55176821 | 0,30921784 | 1,24217229 | 0 | 0 | 0 | 1  | 8  | 0 | 0 | 0 |
| 0,55176821 | 0,30921784 | 1,24217229 | 0 | 0 | 0 | 0  | 34 | 0 | 0 | 3 |
| 0,51015616 | 0,28677635 | 1,2580314  | 0 | 0 | 0 | 3  | 10 | 0 | 3 | 0 |
| 0,46844145 | 0,12435839 | 1,08573385 | 0 | 0 | 0 | 4  | 15 | 0 | 0 | 2 |
| 0,50172181 | 0,3302252  | 0,94294873 | 0 | 0 | 0 | 4  | 2  | 1 | 2 | 1 |
| 0,38268433 | 0,22568591 | 1,34165793 | 0 | 0 | 0 | 6  | 2  | 0 | 0 | 0 |
| 0,47669222 | 0,27168463 | 1,31407154 | 0 | 0 | 0 | 7  | 7  | 0 | 1 | 0 |
| 0,39137247 | 0,25714933 | 1,4279888  | 0 | 0 | 0 | 3  | 2  | 0 | 0 | 0 |
| 0,32969099 | 0,22028539 | 1,38018622 | 0 | 0 | 0 | 12 | 1  | 0 | 3 | 0 |
| 0,32197016 | 0          | 1,28044953 | 0 | 0 | 0 | 6  | 2  | 0 | 0 | 0 |
| 0,32197016 | 0          | 1,28044953 | 0 | 0 | 0 | 17 | 1  | 1 | 0 | 0 |
| 0,32197016 | 0          | 1,28044953 | 0 | 0 | 0 | 6  | 2  | 0 | 0 | 0 |
| 0,40266092 | 0,22396873 | 1,69124717 | 0 | 0 | 0 | 10 | 0  | 0 | 0 | 0 |
| 0,39520684 | 0,23320634 | 1,25491155 | 0 | 0 | 0 | 12 | 0  | 0 | 2 | 1 |
| 0,3922231  | 0,19917696 | 1,31298286 | 0 | 0 | 0 | 9  | 3  | 1 | 0 | 1 |
| 0,37631517 | 0,20627795 | 1,921936   | 0 | 0 | 0 | 11 | 0  | 0 | 0 | 0 |
| 0,42448874 | 0,03928325 | 1,21302143 | 0 | 0 | 0 | 9  | 4  | 0 | 0 | 0 |
| 0,39897069 | 0,18558285 | 1,21840428 | 0 | 0 | 0 | 3  | 0  | 0 | 0 | 0 |
| 0,43832067 | 0,26416114 | 1,41555643 | 0 | 0 | 0 | 12 | 4  | 0 | 0 | 0 |
| 0,4326769  | 0,21545146 | 1,34571691 | 0 | 0 | 0 | 12 | 0  | 0 | 0 | 0 |
| 0,4326769  | 0,21545146 | 1,34571691 | 0 | 0 | 0 | 14 | 3  | 0 | 0 | 0 |
| 0,4326769  | 0,21545146 | 1,34571691 | 0 | 0 | 0 | 6  | 0  | 1 | 1 | 0 |
| 0,42481119 | 0,26603834 | 1,78390022 | 0 | 0 | 0 | 10 | 2  | 0 | 0 | 0 |
| 0,41539025 | 0,20650711 | 1,49938487 | 0 | 0 | 0 | 8  | 0  | 0 | 1 | 1 |
| 0,38032142 | 0,20427641 | 2,00307164 | 0 | 0 | 0 | 18 | 1  | 0 | 1 | 0 |
| 0,29902702 | 0,01231737 | 1,85408037 | 0 | 0 | 0 | 5  | 0  | 0 | 0 | 0 |

|            |            |            |   |   |   |    |   |   |   |   |
|------------|------------|------------|---|---|---|----|---|---|---|---|
| 0,4405593  | 0,24683899 | 1,67335113 | 0 | 0 | 0 | 10 | 0 | 0 | 0 | 0 |
| 0,47118776 | 0,26454138 | 1,33562757 | 0 | 0 | 0 | 9  | 1 | 0 | 1 | 0 |
| 0,38457035 | 0,19467722 | 1,91657377 | 0 | 1 | 0 | 3  | 0 | 0 | 1 | 0 |
| 0,38792744 | 0,21466638 | 1,54051842 | 0 | 0 | 0 | 7  | 0 | 0 | 0 | 0 |
| 0,38792744 | 0,21466638 | 1,54051842 | 0 | 2 | 0 | 3  | 0 | 1 | 0 | 0 |
| 0,38792744 | 0,21466638 | 1,54051842 | 0 | 2 | 0 | 0  | 1 | 0 | 0 | 3 |
| 0,32159967 | 0          | 1,52949959 | 0 | 0 | 0 | 8  | 0 | 0 | 0 | 0 |
| 0,37183822 | 0,00748539 | 1,388784   | 0 | 0 | 0 | 6  | 0 | 1 | 1 | 1 |
| 0,3182122  | 0,20394554 | 2,18358444 | 0 | 0 | 0 | 1  | 1 | 3 | 0 | 0 |
| 0,22130572 | 0          | 2,27141035 | 1 | 0 | 0 | 7  | 1 | 0 | 2 | 0 |
| 0,30007279 | 0,00847713 | 1,64001982 | 0 | 0 | 0 | 12 | 0 | 3 | 0 | 1 |
| 0,25129528 | 0          | 2,10264096 | 0 | 0 | 0 | 4  | 0 | 0 | 0 | 0 |
| 0,22045812 | 0,01037371 | 2,54299823 | 0 | 0 | 0 | 1  | 0 | 1 | 0 | 0 |
| 0,20045608 | 0          | 2,76778359 | 0 | 0 | 0 | 7  | 0 | 0 | 0 | 0 |
| 0,20045608 | 0          | 2,76778359 | 0 | 0 | 0 | 11 | 1 | 0 | 4 | 0 |
| 0,20045608 | 0          | 2,76778359 | 0 | 0 | 0 | 2  | 0 | 0 | 0 | 0 |
| 0,21432928 | 0          | 2,1914194  | 0 | 0 | 0 | 8  | 0 | 0 | 1 | 0 |
| 0,23673157 | 0          | 2,37871036 | 0 | 0 | 0 | 5  | 0 | 0 | 0 | 0 |
| 0,26000912 | 0          | 1,8474634  | 0 | 0 | 0 | 8  | 0 | 0 | 0 | 0 |
| 0,26202482 | 0          | 2,03221406 | 0 | 0 | 0 | 0  | 0 | 0 | 0 | 0 |
| 0,31243079 | 0          | 1,4884539  | 0 | 0 | 0 | 8  | 0 | 0 | 1 | 0 |
| 0,32220877 | 0          | 1,46882947 | 0 | 0 | 0 | 3  | 0 | 0 | 1 | 1 |
| 0,3251287  | 0          | 1,5472831  | 0 | 0 | 0 | 4  | 1 | 0 | 0 | 0 |
| 0,27903105 | 0          | 2,03890142 | 0 | 0 | 0 | 4  | 0 | 0 | 0 | 0 |
| 0,27903105 | 0          | 2,03890142 | 0 | 0 | 0 | 0  | 0 | 0 | 0 | 0 |
| 0,27903105 | 0          | 2,03890142 | 0 | 0 | 0 | 0  | 0 | 0 | 0 | 0 |
| 0,27407714 | 0          | 2,02030517 | 0 | 0 | 0 | 0  | 0 | 0 | 1 | 0 |
| 0,28074189 | 0          | 1,63275136 | 0 | 0 | 0 | 2  | 0 | 0 | 1 | 3 |
| 0,2834539  | 0          | 1,53694665 | 0 | 0 | 0 | 3  | 0 | 0 | 0 | 0 |

|            |              |   |   |   |    |   |   |   |   |
|------------|--------------|---|---|---|----|---|---|---|---|
| 0,24013196 | 0 1,80408342 | 0 | 0 | 0 | 0  | 0 | 0 | 0 | 0 |
| 0,28193566 | 0 1,77939821 | 0 | 0 | 0 | 0  | 0 | 0 | 0 | 0 |
| 0,25026227 | 0 1,85055262 | 0 | 0 | 0 | 0  | 0 | 0 | 0 | 0 |
| 0,26758122 | 0 1,98516674 | 0 | 0 | 0 | 0  | 0 | 0 | 0 | 1 |
| 0,22563501 | 0 2,14517365 | 0 | 0 | 0 | 0  | 0 | 0 | 0 | 0 |
| 0,22563501 | 0 2,14517365 | 0 | 0 | 0 | 1  | 0 | 0 | 0 | 0 |
| 0,22563501 | 0 2,14517365 | 0 | 0 | 0 | 1  | 0 | 0 | 0 | 0 |
| 0,2556268  | 0 2,18771296 | 0 | 0 | 0 | 1  | 0 | 1 | 0 | 0 |
| 0,24842921 | 0 1,79108989 | 0 | 0 | 0 | 0  | 0 | 1 | 0 | 0 |
| 0,33320318 | 0 1,99387437 | 0 | 0 | 0 | 6  | 0 | 0 | 1 | 0 |
| 0,33369885 | 0 1,35844544 | 0 | 0 | 0 | 3  | 0 | 2 | 1 | 0 |
| 0,27731478 | 0 2,46979331 | 0 | 0 | 0 | 2  | 0 | 0 | 0 | 0 |
| 0,32042809 | 0 2,03145859 | 0 | 0 | 0 | 4  | 0 | 1 | 0 | 0 |
| 0,33480338 | 0 1,69071109 | 0 | 0 | 0 | 6  | 0 | 1 | 0 | 0 |
| 0,33480338 | 0 1,69071109 | 0 | 0 | 0 | 1  | 0 | 1 | 0 | 0 |
| 0,33480338 | 0 1,69071109 | 0 | 0 | 0 | 5  | 1 | 0 | 1 | 0 |
| 0,26569512 | 0 2,29892584 | 0 | 0 | 0 | 4  | 0 | 1 | 0 | 0 |
| 0,32488382 | 0 1,66366223 | 0 | 0 | 0 | 4  | 0 | 0 | 0 | 0 |
| 0,27729293 | 0 2,21124897 | 0 | 0 | 0 | 4  | 0 | 4 | 0 | 0 |
| 0,32385499 | 0 1,42140072 | 0 | 0 | 0 | 3  | 0 | 1 | 0 | 0 |
| 0,28175046 | 0 2,18420123 | 0 | 0 | 0 | 9  | 0 | 0 | 0 | 0 |
| 0,31938347 | 0 2,33105448 | 0 | 0 | 0 | 8  | 0 | 0 | 0 | 0 |
| 0,31553726 | 0 2,15297144 | 0 | 0 | 0 | 10 | 0 | 3 | 0 | 0 |
| 0,31009903 | 0 1,64960268 | 0 | 0 | 0 | 4  | 0 | 0 | 0 | 0 |
| 0,31009903 | 0 1,64960268 | 0 | 0 | 0 | 9  | 0 | 0 | 0 | 0 |
| 0,31009903 | 0 1,64960268 | 0 | 0 | 0 | 6  | 0 | 2 | 1 | 0 |
| 0,29915356 | 0 1,80901133 | 0 | 0 | 0 | 5  | 0 | 2 | 0 | 0 |
| 0,25213837 | 0 2,11826887 | 0 | 0 | 0 | 3  | 0 | 0 | 1 | 0 |
| 0,29748714 | 0 1,92546825 | 0 | 0 | 0 | 6  | 0 | 0 | 0 | 0 |

|            |            |            |   |   |   |    |   |   |   |   |
|------------|------------|------------|---|---|---|----|---|---|---|---|
| 0,28707988 | 0          | 1,64398996 | 0 | 0 | 0 | 2  | 1 | 0 | 0 | 0 |
| 0,30823763 | 0          | 1,81440707 | 0 | 0 | 0 | 3  | 0 | 0 | 0 | 1 |
| 0,25767342 | 0          | 1,97628439 | 0 | 0 | 0 | 1  | 0 | 1 | 1 | 0 |
| 0,28726028 | 0          | 1,64491155 | 0 | 0 | 0 | 7  | 0 | 1 | 1 | 0 |
| 0,30502473 | 0          | 1,62318545 | 0 | 0 | 0 | 3  | 0 | 1 | 0 | 1 |
| 0,30502473 | 0          | 1,62318545 | 0 | 0 | 0 | 4  | 0 | 0 | 0 | 0 |
| 0,30502473 | 0          | 1,62318545 | 0 | 0 | 0 | 5  | 0 | 2 | 0 | 0 |
| 0,26203829 | 0          | 2,15408194 | 0 | 0 | 0 | 2  | 0 | 0 | 0 | 0 |
| 0,23004898 | 0          | 2,27710013 | 0 | 0 | 0 | 0  | 0 | 1 | 0 | 0 |
| 0,2746407  | 0          | 1,80001639 | 0 | 0 | 0 | 0  | 0 | 2 | 0 | 0 |
| 0,29583141 | 0          | 1,568125   | 0 | 0 | 0 | 1  | 0 | 0 | 0 | 0 |
| 0,38837274 | 0,01108851 | 1,40358648 | 0 | 0 | 0 | 5  | 0 | 0 | 1 | 0 |
| 0,28712266 | 0          | 1,37306154 | 0 | 0 | 0 | 5  | 0 | 0 | 0 | 0 |
| 0,30841032 | 0          | 1,67637555 | 0 | 0 | 0 | 10 | 0 | 0 | 0 | 0 |
| 0,31837198 | 0          | 1,56478177 | 0 | 0 | 0 | 5  | 0 | 0 | 0 | 0 |
| 0,31837198 | 0          | 1,56478177 | 0 | 0 | 0 | 1  | 0 | 0 | 1 | 0 |
| 0,31837198 | 0          | 1,56478177 | 0 | 0 | 0 | 7  | 0 | 0 | 0 | 0 |
| 0,32198382 | 0          | 1,80768664 | 0 | 0 | 0 | 2  | 0 | 0 | 0 | 0 |
| 0,33792365 | 0          | 1,66930584 | 0 | 0 | 0 | 4  | 2 | 0 | 0 | 0 |
| 0,40777558 | 0          | 1,40748961 | 0 | 0 | 0 | 15 | 0 | 0 | 0 | 0 |
| 0,37764353 | 0          | 1,28756825 | 0 | 0 | 0 | 4  | 0 | 0 | 0 | 0 |
| 0,4736378  | 0,04265258 | 1,40282928 | 0 | 0 | 0 | 2  | 0 | 1 | 0 | 1 |
| 0,40666454 | 0,00807845 | 1,53319601 | 0 | 0 | 0 | 6  | 0 | 0 | 0 | 0 |
| 0,43087911 | 0,01232103 | 1,04419491 | 0 | 0 | 0 | 4  | 1 | 0 | 0 | 0 |
| 0,39874617 | 0,00747804 | 1,18996471 | 0 | 0 | 0 | 4  | 0 | 0 | 0 | 0 |
| 0,39874617 | 0,00747804 | 1,18996471 | 0 | 0 | 0 | 2  | 0 | 0 | 0 | 0 |
| 0,39874617 | 0,00747804 | 1,18996471 | 0 | 0 | 0 | 3  | 0 | 0 | 0 | 0 |
| 0,40045836 | 0          | 1,247352   | 0 | 0 | 0 | 2  | 0 | 0 | 0 | 0 |
| 0,40393182 | 0,00893992 | 1,39422954 | 0 | 0 | 0 | 1  | 0 | 0 | 0 | 0 |

|            |            |            |   |   |   |    |    |   |   |   |
|------------|------------|------------|---|---|---|----|----|---|---|---|
| 0,39991253 | 0,00842803 | 1,30809098 | 0 | 0 | 0 | 3  | 0  | 0 | 0 | 0 |
| 0,44499152 | 0,01134352 | 1,19631016 | 0 | 0 | 0 | 3  | 0  | 0 | 0 | 0 |
| 0,44994023 | 0,2875121  | 1,93498062 | 0 | 0 | 0 | 4  | 1  | 0 | 0 | 0 |
| 0,44521566 | 0,0089483  | 1,27525762 | 0 | 0 | 0 | 4  | 0  | 0 | 0 | 0 |
| 0,46518234 | 0,03016266 | 1,31712072 | 0 | 0 | 0 | 8  | 2  | 1 | 0 | 0 |
| 0,45109461 | 0,02336941 | 1,38339401 | 0 | 0 | 0 | 0  | 1  | 0 | 0 | 0 |
| 0,45109461 | 0,02336941 | 1,38339401 | 0 | 0 | 0 | 3  | 0  | 0 | 0 | 0 |
| 0,45109461 | 0,02336941 | 1,38339401 | 0 | 0 | 0 | 0  | 0  | 0 | 0 | 0 |
| 0,47183557 | 0,05879039 | 1,60335055 | 0 | 0 | 0 | 0  | 2  | 0 | 0 | 0 |
| 0,40099374 | 0,12059132 | 1,90528239 | 0 | 0 | 0 | 4  | 2  | 0 | 1 | 0 |
| 0,45879185 | 0,19952411 | 1,81443683 | 0 | 0 | 0 | 2  | 1  | 0 | 0 | 0 |
| 0,45661554 | 0,21303409 | 1,86378888 | 0 | 0 | 0 | 10 | 0  | 0 | 0 | 0 |
| 0,43680104 | 0,25336248 | 1,70595047 | 0 | 0 | 0 | 4  | 2  | 0 | 0 | 0 |
| 0,48579297 | 0,28544423 | 1,37612318 | 0 | 0 | 0 | 2  | 0  | 0 | 0 | 0 |
| 0,41593273 | 0,21880738 | 1,93684124 | 0 | 0 | 0 | 7  | 0  | 1 | 0 | 1 |
| 0,43338327 | 0,22909651 | 1,66034605 | 0 | 0 | 0 | 5  | 3  | 0 | 2 | 0 |
| 0,43338327 | 0,22909651 | 1,66034605 | 0 | 0 | 0 | 8  | 2  | 1 | 0 | 0 |
| 0,43338327 | 0,22909651 | 1,66034605 | 0 | 0 | 0 | 4  | 2  | 0 | 0 | 0 |
| 0,49879302 | 0,29928632 | 1,21516254 | 0 | 0 | 0 | 5  | 2  | 0 | 0 | 1 |
| 0,4275393  | 0,2246156  | 1,4475538  | 0 | 0 | 0 | 10 | 6  | 0 | 0 | 0 |
| 0,44163023 | 0,24778388 | 1,69727988 | 0 | 0 | 0 | 4  | 0  | 0 | 0 | 0 |
| 0,4596116  | 0,23788007 | 1,47171227 | 0 | 0 | 0 | 5  | 0  | 0 | 0 | 0 |
| 0,5594167  | 0,42341339 | 0,39616259 | 0 | 0 | 0 | 2  | 8  | 0 | 0 | 0 |
| 0,46024603 | 0,25654477 | 1,3363061  | 0 | 0 | 0 | 6  | 5  | 0 | 0 | 0 |
| 0,41279259 | 0,25802978 | 1,63675869 | 0 | 0 | 0 | 7  | 1  | 0 | 0 | 0 |
| 0,42906004 | 0,32890145 | 1,82073831 | 0 | 0 | 0 | 8  | 2  | 0 | 0 | 1 |
| 0,42906004 | 0,32890145 | 1,82073831 | 0 | 0 | 0 | 13 | 19 | 0 | 0 | 0 |
| 0,42906004 | 0,32890145 | 1,82073831 | 0 | 0 | 0 | 7  | 17 | 0 | 0 | 0 |
| 0,54961804 | 0,39966945 | 1,3898061  | 0 | 0 | 0 | 10 | 73 | 0 | 0 | 0 |

|            |            |            |   |   |   |    |     |   |   |   |
|------------|------------|------------|---|---|---|----|-----|---|---|---|
| 0,56357602 | 0,43675264 | 1,57515777 | 0 | 0 | 0 | 3  | 4   | 1 | 0 | 0 |
| 0,50040651 | 0,41351448 | 1,55077303 | 0 | 0 | 0 | 2  | 2   | 0 | 0 | 0 |
| 0,53715935 | 0,36391527 | 1,51949498 | 0 | 1 | 0 | 0  | 5   | 0 | 0 | 0 |
| 0,49242566 | 0,0189574  | 1,15168008 | 0 | 0 | 0 | 5  | 87  | 0 | 0 | 0 |
| 0,49144145 | 0,31815199 | 1,65989247 | 0 | 0 | 0 | 4  | 4   | 0 | 0 | 0 |
| 0,51553852 | 0,38888577 | 1,72872959 | 0 | 0 | 0 | 1  | 33  | 0 | 0 | 0 |
| 0,53811318 | 0,36374297 | 1,26150426 | 0 | 0 | 0 | 1  | 18  | 0 | 1 | 0 |
| 0,53811318 | 0,36374297 | 1,26150426 | 0 | 0 | 0 | 9  | 68  | 0 | 0 | 0 |
| 0,53811318 | 0,36374297 | 1,26150426 | 0 | 0 | 0 | 2  | 33  | 0 | 0 | 0 |
| 0,59274534 | 0,2282248  | 1,38968486 | 0 | 0 | 0 | 8  | 58  | 0 | 0 | 0 |
| 0,58961211 | 0,21330968 | 1,14646718 | 0 | 0 | 0 | 13 | 70  | 1 | 0 | 1 |
| 0,51236233 | 0,17247781 | 1,18934982 | 0 | 0 | 0 | 0  | 61  | 1 | 0 | 0 |
| 0,54385044 | 0,03312297 | 1,43591643 | 0 | 0 | 0 | 2  | 39  | 2 | 0 | 0 |
| 0,49074926 | 0          | 1,12541148 | 1 | 0 | 0 | 0  | 6   | 2 | 0 | 0 |
| 0,48954119 | 0,00864013 | 0,99970601 | 0 | 0 | 0 | 2  | 35  | 0 | 0 | 0 |
| 0,53692697 | 0,03929675 | 0,99100772 | 0 | 0 | 0 | 0  | 46  | 1 | 0 | 0 |
| 0,51869791 | 0,01154625 | 0,90027429 | 0 | 0 | 0 | 4  | 45  | 2 | 0 | 0 |
| 0,51869791 | 0,01154625 | 0,90027429 | 0 | 0 | 0 | 1  | 48  | 2 | 0 | 0 |
| 0,51869791 | 0,01154625 | 0,90027429 | 0 | 0 | 0 | 0  | 24  | 0 | 0 | 0 |
| 0,47844286 | 0,01027345 | 0,86856733 | 2 | 0 | 0 | 2  | 14  | 0 | 0 | 0 |
| 0,44550504 | 0          | 1,07376813 | 0 | 0 | 0 | 4  | 24  | 0 | 0 | 0 |
| 0,46491029 | 0          | 1,0335947  | 0 | 0 | 0 | 1  | 7   | 6 | 0 | 0 |
| 0,63927449 | 0,2701257  | 1,30930745 | 0 | 0 | 0 | 5  | 102 | 0 | 0 | 0 |
| 0,52133942 | 0,31263388 | 1,94701053 | 0 | 0 | 0 | 6  | 87  | 0 | 0 | 0 |
| 0,64098456 | 0,24984771 | 1,39676054 | 0 | 0 | 0 | 1  | 121 | 0 | 0 | 0 |
| 0,59012687 | 0,34626462 | 1,20465846 | 1 | 0 | 0 | 6  | 144 | 0 | 0 | 0 |
| 0,60904574 | 0,17780512 | 1,33532655 | 0 | 0 | 0 | 9  | 79  | 0 | 0 | 0 |
| 0,63938351 | 0,23124259 | 1,36902739 | 0 | 0 | 0 | 14 | 69  | 0 | 0 | 0 |
| 0,63938351 | 0,23124259 | 1,36902739 | 0 | 0 | 0 | 17 | 180 | 0 | 0 | 0 |

|            |            |            |   |   |   |    |    |   |   |   |
|------------|------------|------------|---|---|---|----|----|---|---|---|
| 0,63938351 | 0,23124259 | 1,36902739 | 0 | 0 | 0 | 8  | 87 | 0 | 0 | 0 |
| 0,5425817  | 0,25085858 | 1,39915903 | 0 | 0 | 0 | 10 | 50 | 0 | 0 | 0 |
| 0,54335424 | 0,26318891 | 1,41292958 | 0 | 0 | 0 | 3  | 26 | 0 | 0 | 0 |
| 0,5433704  | 0,27405795 | 1,44639206 | 0 | 0 | 0 | 5  | 83 | 0 | 0 | 0 |
| 0,49850124 | 0,30901762 | 1,96365501 | 0 | 0 | 0 | 3  | 0  | 0 | 0 | 0 |
| 0,53499033 | 0,30926505 | 1,37852748 | 0 | 0 | 0 | 7  | 97 | 0 | 0 | 0 |
| 0,54562146 | 0,32381538 | 1,57774554 | 0 | 0 | 0 | 7  | 57 | 0 | 0 | 0 |
| 0,54506765 | 0,26010236 | 1,42638529 | 0 | 0 | 0 | 3  | 23 | 0 | 0 | 0 |
| 0,55690549 | 0,30301579 | 1,7018725  | 0 | 0 | 0 | 5  | 30 | 0 | 0 | 0 |
| 0,55690549 | 0,30301579 | 1,7018725  | 0 | 0 | 0 | 5  | 30 | 0 | 0 | 0 |
| 0,55690549 | 0,30301579 | 1,7018725  | 0 | 0 | 0 | 5  | 73 | 0 | 0 | 0 |
| 0,53377188 | 0,33321434 | 1,93079025 | 0 | 0 | 0 | 5  | 2  | 0 | 2 | 1 |
| 0,4751735  | 0,27882453 | 1,57217111 | 0 | 0 | 0 | 2  | 5  | 0 | 0 | 0 |
| 0,53554716 | 0,32708538 | 1,3859733  | 0 | 0 | 0 | 6  | 5  | 0 | 0 | 0 |
| 0,54215713 | 0,39799815 | 1,48876728 | 0 | 0 | 0 | 4  | 2  | 0 | 0 | 0 |
| 0,51217532 | 0,36510346 | 1,51123261 | 0 | 0 | 0 | 3  | 4  | 0 | 1 | 0 |
| 0,56820368 | 0,35907675 | 1,4094318  | 0 | 0 | 0 | 4  | 4  | 0 | 0 | 0 |
| 0,56515313 | 0,43548372 | 1,27905903 | 0 | 0 | 0 | 3  | 7  | 1 | 1 | 5 |
| 0,57851919 | 0,57245011 | 1,43372103 | 0 | 0 | 0 | 1  | 6  | 0 | 0 | 0 |
| 0,57851919 | 0,57245011 | 1,43372103 | 0 | 0 | 0 | 1  | 5  | 0 | 0 | 0 |
| 0,57851919 | 0,57245011 | 1,43372103 | 0 | 0 | 0 | 9  | 6  | 1 | 2 | 0 |
| 0,4894572  | 0,3346382  | 1,50490963 | 0 | 0 | 0 | 11 | 1  | 0 | 0 | 0 |
| 0,51050538 | 0,37521668 | 1,27975701 | 0 | 0 | 0 | 8  | 8  | 0 | 0 | 0 |
| 0,52574099 | 0,37198871 | 1,40228849 | 0 | 0 | 0 | 4  | 0  | 0 | 0 | 0 |
| 0,51211293 | 0,31373035 | 1,48518787 | 0 | 0 | 0 | 5  | 4  | 2 | 0 | 0 |
| 0,53620465 | 0,35050883 | 1,63011257 | 0 | 0 | 0 | 4  | 7  | 1 | 1 | 0 |
| 0,53148067 | 0,32370712 | 1,99042006 | 0 | 0 | 0 | 8  | 11 | 0 | 1 | 0 |
| 0,49636707 | 0,29000661 | 1,70615328 | 0 | 0 | 0 | 3  | 4  | 0 | 1 | 0 |
| 0,50850124 | 0,22317665 | 1,40791264 | 0 | 0 | 0 | 3  | 6  | 0 | 0 | 0 |



|            |            |            |   |   |   |    |   |   |   |   |
|------------|------------|------------|---|---|---|----|---|---|---|---|
| 0,50850124 | 0,22317665 | 1,40791264 | 0 | 0 | 0 | 6  | 8 | 0 | 0 | 0 |
| 0,50850124 | 0,22317665 | 1,40791264 | 0 | 0 | 0 | 10 | 4 | 0 | 0 | 0 |
| 0,48380609 | 0,25479142 | 1,5752057  | 0 | 0 | 0 | 2  | 4 | 0 | 0 | 0 |
| 0,4721619  | 0,27272858 | 1,31784028 | 0 | 0 | 0 | 7  | 1 | 0 | 2 | 0 |
| 0,46871171 | 0,18589808 | 1,39564967 | 0 | 0 | 0 | 4  | 0 | 1 | 0 | 0 |
| 0,44701726 | 0,0084789  | 1,23767241 | 0 | 0 | 0 | 0  | 0 | 0 | 0 | 0 |
| 0,46610459 | 0,23795724 | 1,47577674 | 0 | 0 | 0 | 2  | 1 | 0 | 0 | 0 |
| 0,49981453 | 0,18799459 | 1,3697456  | 0 | 0 | 0 | 2  | 0 | 0 | 0 | 0 |
| 0,47407753 | 0,2037613  | 1,26612717 | 0 | 0 | 0 | 5  | 0 | 0 | 0 | 0 |
| 0,48473478 | 0,22632087 | 1,74467905 | 0 | 0 | 0 | 1  | 2 | 0 | 0 | 0 |
| 0,48473478 | 0,22632087 | 1,74467905 | 0 | 0 | 0 | 5  | 2 | 0 | 0 | 0 |
| 0,48473478 | 0,22632087 | 1,74467905 | 0 | 0 | 0 | 0  | 0 | 0 | 0 | 0 |
| 0,47147869 | 0,0306399  | 1,30758174 | 0 | 0 | 0 | 8  | 4 | 0 | 0 | 1 |
| 0,44621852 | 0,00957929 | 1,20031204 | 0 | 0 | 0 | 1  | 1 | 0 | 0 | 0 |
| 0,48745702 | 0,18760247 | 1,37722438 | 0 | 0 | 0 | 2  | 0 | 0 | 0 | 0 |
| 0,29836948 | 0,01025542 | 2,26802094 | 0 | 0 | 0 | 1  | 0 | 1 | 0 | 0 |
| 0,43830206 | 0,00709724 | 1,12338506 | 0 | 0 | 0 | 7  | 0 | 0 | 0 | 0 |
| 0,47966702 | 0,01715689 | 1,15470039 | 0 | 0 | 0 | 4  | 0 | 0 | 0 | 0 |
| 0,45304742 | 0,01171778 | 1,14707846 | 0 | 0 | 0 | 1  | 1 | 0 | 0 | 0 |
| 0,52172    | 0,18274159 | 1,22162105 | 0 | 0 | 0 | 0  | 3 | 0 | 0 | 0 |
| 0,52172    | 0,18274159 | 1,22162105 | 1 | 0 | 0 | 6  | 0 | 1 | 0 | 0 |
| 0,52172    | 0,18274159 | 1,22162105 | 0 | 0 | 0 | 3  | 0 | 1 | 0 | 0 |
| 0,43650239 | 0,00939375 | 1,41794499 | 0 | 0 | 0 | 5  | 0 | 0 | 0 | 0 |
| 0,44897352 | 0,03268915 | 1,52568149 | 0 | 0 | 0 | 1  | 0 | 0 | 0 | 0 |
| 0,37079449 | 0          | 1,7550245  | 0 | 0 | 0 | 0  | 0 | 0 | 0 | 0 |
| 0,33711283 | 0          | 1,48664454 | 0 | 0 | 0 | 3  | 0 | 1 | 0 | 0 |
| 0,40091833 | 0          | 1,41333648 | 0 | 0 | 0 | 2  | 0 | 0 | 0 | 0 |
| 0,37369048 | 0          | 1,16832958 | 1 | 0 | 0 | 3  | 4 | 0 | 0 | 0 |
| 0,38366009 | 0          | 1,02884936 | 0 | 0 | 0 | 4  | 1 | 1 | 0 | 0 |

|            |            |            |   |   |   |   |   |   |   |   |
|------------|------------|------------|---|---|---|---|---|---|---|---|
| 0,36294299 | 0          | 1,47688354 | 0 | 0 | 0 | 0 | 0 | 0 | 0 | 0 |
| 0,36294299 | 0          | 1,47688354 | 0 | 0 | 0 | 3 | 0 | 0 | 0 | 0 |
| 0,36294299 | 0          | 1,47688354 | 1 | 0 | 0 | 3 | 0 | 1 | 0 | 1 |
| 0,32795522 | 0          | 1,30512605 | 0 | 0 | 0 | 3 | 0 | 0 | 0 | 0 |
| 0,32079073 | 0          | 1,09139177 | 0 | 0 | 0 | 0 | 0 | 1 | 0 | 0 |
| 0,34807169 | 0          | 1,59704602 | 0 | 0 | 0 | 7 | 0 | 0 | 0 | 0 |
| 0,35486473 | 0          | 1,63912629 | 0 | 0 | 0 | 1 | 0 | 0 | 0 | 0 |
| 0,34089066 | 0          | 1,37257022 | 0 | 0 | 0 | 2 | 0 | 1 | 0 | 0 |
| 0,26620649 | 0          | 1,42213642 | 0 | 0 | 0 | 1 | 0 | 1 | 0 | 0 |
| 0,29358571 | 0          | 1,25376792 | 1 | 0 | 0 | 6 | 2 | 0 | 1 | 0 |
| 0,27319716 | 0          | 1,35446927 | 0 | 0 | 0 | 3 | 6 | 0 | 0 | 0 |
| 0,27319716 | 0          | 1,35446927 | 0 | 0 | 0 | 3 | 0 | 0 | 0 | 0 |
| 0,27319716 | 0          | 1,35446927 | 0 | 0 | 0 | 4 | 0 | 0 | 0 | 0 |
| 0,34370237 | 0          | 1,58095762 | 0 | 0 | 0 | 4 | 0 | 1 | 0 | 0 |
| 0,34579527 | 0          | 1,29080246 | 0 | 0 | 0 | 7 | 0 | 0 | 0 | 0 |
| 0,32634152 | 0          | 1,41292958 | 0 | 0 | 0 | 1 | 0 | 3 | 0 | 0 |
| 0,36163298 | 0          | 1,5095655  | 0 | 0 | 0 | 2 | 1 | 0 | 0 | 0 |
| 0,34243807 | 0          | 1,61821785 | 0 | 0 | 0 | 3 | 0 | 1 | 1 | 0 |
| 0,34888165 | 0          | 1,71564653 | 0 | 0 | 0 | 3 | 0 | 0 | 0 | 0 |
| 0,3863492  | 0          | 1,70841125 | 0 | 0 | 0 | 9 | 0 | 1 | 0 | 0 |
| 0,35718708 | 0          | 1,46181223 | 0 | 0 | 0 | 3 | 0 | 1 | 0 | 0 |
| 0,35718708 | 0          | 1,46181223 | 0 | 0 | 0 | 0 | 0 | 0 | 0 | 0 |
| 0,35718708 | 0          | 1,46181223 | 1 | 0 | 0 | 5 | 0 | 1 | 0 | 0 |
| 0,361007   | 0          | 1,56702712 | 0 | 0 | 0 | 1 | 0 | 2 | 0 | 0 |
| 0,3758528  | 0          | 1,51460028 | 0 | 0 | 1 | 0 | 1 | 1 | 0 | 0 |
| 0,32261024 | 0          | 1,43826667 | 0 | 0 | 0 | 1 | 0 | 1 | 0 | 0 |
| 0,40391369 | 0,00917128 | 1,7957678  | 0 | 0 | 0 | 0 | 0 | 4 | 0 | 0 |
| 0,33110656 | 0          | 1,35303104 | 0 | 0 | 0 | 0 | 0 | 1 | 0 | 0 |
| 0,36203275 | 0          | 1,64170003 | 0 | 0 | 0 | 4 | 0 | 1 | 0 | 1 |

|            |            |            |   |   |   |   |   |   |   |   |
|------------|------------|------------|---|---|---|---|---|---|---|---|
| 0,3696013  | 0          | 1,8824415  | 0 | 0 | 0 | 2 | 0 | 0 | 0 | 0 |
| 0,32535972 | 0          | 1,96906602 | 0 | 0 | 0 | 5 | 0 | 0 | 0 | 0 |
| 0,32535972 | 0          | 1,96906602 | 0 | 0 | 0 | 0 | 0 | 0 | 0 | 0 |
| 0,32535972 | 0          | 1,96906602 | 0 | 0 | 0 | 1 | 0 | 1 | 0 | 0 |
| 0,35951255 | 0          | 1,86050531 | 0 | 0 | 0 | 2 | 0 | 0 | 1 | 0 |
| 0,36238177 | 0          | 1,47979086 | 0 | 0 | 0 | 7 | 0 | 2 | 1 | 0 |
| 0,37697931 | 0          | 1,45937658 | 0 | 0 | 0 | 0 | 0 | 0 | 0 | 0 |
| 0,55224637 | 0,30437296 | 1,53297554 | 0 | 0 | 0 | 4 | 0 | 0 | 0 | 0 |
| 0,40553945 | 0,00868688 | 1,60732075 | 0 | 0 | 0 | 2 | 0 | 0 | 0 | 0 |
| 0,42547522 | 0,01224816 | 1,47669022 | 0 | 0 | 0 | 0 | 2 | 0 | 0 | 0 |
| 0,42031525 | 0,01088874 | 1,5616264  | 0 | 0 | 0 | 1 | 0 | 1 | 0 | 0 |
| 0,42031525 | 0,01088874 | 1,5616264  | 0 | 0 | 0 | 0 | 0 | 0 | 0 | 0 |
| 0,42031525 | 0,01088874 | 1,5616264  | 0 | 0 | 0 | 0 | 1 | 1 | 1 | 0 |
| 0,43159121 | 0,01152544 | 1,65705341 | 0 | 0 | 0 | 0 | 0 | 0 | 0 | 0 |
| 0,43263749 | 0          | 1,42123256 | 0 | 0 | 0 | 2 | 0 | 1 | 1 | 0 |
| 0,39755601 | 0          | 1,71458975 | 0 | 0 | 0 | 1 | 0 | 1 | 0 | 0 |
| 0,39461351 | 0          | 1,45874329 | 0 | 0 | 0 | 4 | 0 | 0 | 0 | 0 |
| 0,41890096 | 0          | 1,70811212 | 0 | 0 | 0 | 1 | 0 | 1 | 0 | 0 |
| 0,42654974 | 0          | 1,48466225 | 0 | 0 | 0 | 1 | 0 | 1 | 0 | 0 |
| 0,43312765 | 0          | 1,63445128 | 0 | 0 | 0 | 1 | 0 | 1 | 0 | 0 |
| 0,4440109  | 0          | 1,29549334 | 0 | 0 | 0 | 0 | 0 | 0 | 0 | 0 |
| 0,4440109  | 0          | 1,29549334 | 0 | 0 | 0 | 2 | 0 | 1 | 0 | 0 |
| 0,4440109  | 0          | 1,29549334 | 0 | 0 | 0 | 5 | 0 | 0 | 0 | 0 |
| 0,3647297  | 0          | 1,56243976 | 0 | 0 | 0 | 8 | 0 | 0 | 0 | 0 |
| 0,37021704 | 0          | 1,58652293 | 0 | 0 | 0 | 3 | 0 | 1 | 2 | 0 |
| 0,41850683 | 0          | 1,5551897  | 0 | 0 | 0 | 0 | 0 | 0 | 0 | 0 |
| 0,41475816 | 0          | 1,52517442 | 0 | 0 | 0 | 0 | 0 | 0 | 0 | 0 |
| 0,38894776 | 0          | 0,99631461 | 0 | 0 | 0 | 6 | 0 | 0 | 0 | 0 |
| 0,38529502 | 0          | 1,49794493 | 0 | 0 | 0 | 1 | 0 | 0 | 0 | 0 |

|            |            |            |   |   |   |    |   |   |   |   |
|------------|------------|------------|---|---|---|----|---|---|---|---|
| 0,41522461 | 0          | 1,59704227 | 0 | 0 | 0 | 1  | 0 | 0 | 1 | 0 |
| 0,36099914 | 0          | 1,16193244 | 0 | 0 | 0 | 0  | 0 | 0 | 0 | 0 |
| 0,36099914 | 0          | 1,16193244 | 1 | 0 | 0 | 0  | 0 | 1 | 0 | 0 |
| 0,36099914 | 0          | 1,16193244 | 0 | 0 | 0 | 5  | 0 | 1 | 0 | 0 |
| 0,3793388  | 0          | 1,38645736 | 0 | 0 | 0 | 6  | 1 | 1 | 0 | 0 |
| 0,4323115  | 0          | 1,15802375 | 0 | 0 | 0 | 7  | 0 | 2 | 0 | 0 |
| 0,41125792 | 0          | 1,21549496 | 0 | 0 | 0 | 2  | 0 | 0 | 0 | 0 |
| 0,41259295 | 0          | 1,3008159  | 0 | 0 | 0 | 4  | 0 | 0 | 0 | 0 |
| 0,40414843 | 0          | 1,2609544  | 0 | 0 | 0 | 1  | 0 | 0 | 0 | 0 |
| 0,41270564 | 0          | 1,44636061 | 0 | 0 | 0 | 0  | 0 | 0 | 0 | 0 |
| 0,39675952 | 0          | 1,46125768 | 0 | 0 | 0 | 4  | 0 | 0 | 0 | 0 |
| 0,37816578 | 0          | 1,25526451 | 0 | 0 | 0 | 1  | 0 | 0 | 0 | 0 |
| 0,37816578 | 0          | 1,25526451 | 0 | 0 | 0 | 0  | 0 | 0 | 0 | 0 |
| 0,37816578 | 0          | 1,25526451 | 0 | 0 | 0 | 1  | 1 | 0 | 0 | 0 |
| 0,3893426  | 0          | 1,21339524 | 0 | 0 | 0 | 5  | 1 | 4 | 0 | 0 |
| 0,36094799 | 0          | 1,88598568 | 0 | 0 | 0 | 1  | 0 | 1 | 0 | 0 |
| 0,3809617  | 0,00731238 | 1,94404347 | 0 | 0 | 0 | 4  | 0 | 0 | 0 | 0 |
| 0,36700983 | 0,00918163 | 1,47114309 | 0 | 0 | 0 | 1  | 0 | 0 | 0 | 0 |
| 0,49035979 | 0,03542082 | 1,24058736 | 0 | 0 | 0 | 6  | 0 | 0 | 0 | 0 |
| 0,37032909 | 0          | 1,76479659 | 0 | 0 | 0 | 2  | 0 | 2 | 0 | 0 |
| 0,39998181 | 0          | 1,63038431 | 0 | 0 | 0 | 5  | 0 | 1 | 0 | 0 |
| 0,43634198 | 0,00901677 | 1,47767892 | 0 | 0 | 0 | 5  | 0 | 1 | 0 | 0 |
| 0,43634198 | 0,00901677 | 1,47767892 | 0 | 0 | 0 | 3  | 1 | 0 | 0 | 0 |
| 0,43634198 | 0,00901677 | 1,47767892 | 0 | 0 | 0 | 7  | 3 | 0 | 0 | 0 |
| 0,42435257 | 0,00963446 | 1,21957985 | 0 | 0 | 0 | 2  | 1 | 0 | 1 | 0 |
| 0,47164202 | 0,01345886 | 1,25910127 | 0 | 0 | 0 | 12 | 0 | 0 | 0 | 0 |
| 0,47968864 | 0,03465459 | 1,3926166  | 0 | 0 | 0 | 3  | 0 | 0 | 2 | 0 |
| 0,47829261 | 0,01322045 | 1,16519912 | 0 | 0 | 0 | 9  | 0 | 0 | 0 | 0 |
| 0,45784788 | 0,01741639 | 1,45437478 | 0 | 0 | 0 | 2  | 2 | 0 | 1 | 0 |

|            |            |            |   |   |   |    |   |   |   |   |
|------------|------------|------------|---|---|---|----|---|---|---|---|
| 0,45295543 | 0,00768317 | 1,24601445 | 0 | 0 | 0 | 8  | 0 | 0 | 0 | 0 |
| 0,45583919 | 0,00831815 | 1,16859745 | 0 | 0 | 0 | 3  | 2 | 0 | 0 | 0 |
| 0,55960488 | 0,17004099 | 1,16059381 | 0 | 0 | 0 | 3  | 1 | 0 | 0 | 0 |
| 0,55960488 | 0,17004099 | 1,16059381 | 0 | 0 | 0 | 6  | 1 | 0 | 0 | 0 |
| 0,55960488 | 0,17004099 | 1,16059381 | 0 | 0 | 0 | 7  | 0 | 0 | 0 | 2 |
| 0,57064259 | 0,30379226 | 1,08144209 | 0 | 0 | 0 | 5  | 4 | 0 | 0 | 0 |
| 0,52706233 | 0,14697971 | 0,98343378 | 0 | 0 | 0 | 8  | 0 | 0 | 0 | 0 |
| 0,48611526 | 0,15687404 | 1,05677765 | 0 | 0 | 0 | 4  | 1 | 0 | 0 | 0 |
| 0,50216197 | 0,15884531 | 1,12824864 | 0 | 0 | 0 | 1  | 1 | 1 | 4 | 0 |
| 0,51380156 | 0,29380905 | 1,13377599 | 0 | 0 | 0 | 6  | 0 | 0 | 0 | 0 |
| 0,39804405 | 0          | 1,32706255 | 1 | 0 | 0 | 6  | 3 | 0 | 1 | 0 |
| 0,53718278 | 0,19328373 | 1,33999254 | 0 | 0 | 0 | 0  | 1 | 0 | 0 | 0 |
| 0,53064199 | 0,25648581 | 1,18874556 | 0 | 0 | 0 | 3  | 2 | 0 | 0 | 0 |
| 0,53064199 | 0,25648581 | 1,18874556 | 0 | 0 | 0 | 2  | 0 | 0 | 0 | 0 |
| 0,53064199 | 0,25648581 | 1,18874556 | 0 | 0 | 0 | 3  | 0 | 0 | 0 | 0 |
| 0,52243567 | 0,31251928 | 1,12227269 | 0 | 0 | 0 | 1  | 2 | 0 | 2 | 1 |
| 0,52769088 | 0,31427813 | 1,25931608 | 0 | 0 | 0 | 5  | 0 | 0 | 0 | 0 |
| 0,54122305 | 0,36708238 | 1,31937258 | 0 | 0 | 0 | 5  | 2 | 0 | 2 | 0 |
| 0,53611174 | 0,3632332  | 1,2857317  | 0 | 0 | 0 | 4  | 3 | 1 | 0 | 0 |
| 0,5099292  | 0,31314748 | 1,29406723 | 0 | 0 | 0 | 1  | 9 | 0 | 0 | 0 |
| 0,52589429 | 0,28279429 | 1,22890968 | 1 | 0 | 0 | 8  | 0 | 0 | 0 | 0 |
| 0,45932693 | 0,03983817 | 1,52525998 | 0 | 0 | 0 | 10 | 0 | 0 | 0 | 0 |
| 0,48700246 | 0,28850722 | 1,4213381  | 0 | 0 | 0 | 3  | 0 | 0 | 0 | 0 |
| 0,48700246 | 0,28850722 | 1,4213381  | 0 | 0 | 0 | 4  | 7 | 0 | 2 | 0 |
| 0,48700246 | 0,28850722 | 1,4213381  | 0 | 0 | 0 | 3  | 1 | 0 | 0 | 2 |
| 0,53722031 | 0,31027585 | 1,2626884  | 0 | 0 | 0 | 7  | 6 | 0 | 2 | 0 |
| 0,57274085 | 0,41110003 | 1,43143215 | 0 | 0 | 0 | 3  | 5 | 0 | 0 | 0 |
| 0,51686031 | 0,33898226 | 1,34248687 | 0 | 0 | 0 | 5  | 1 | 0 | 1 | 0 |
| 0,54181373 | 0,39827726 | 1,51772231 | 0 | 0 | 0 | 2  | 1 | 0 | 0 | 0 |

|            |            |            |   |   |   |    |    |   |   |   |
|------------|------------|------------|---|---|---|----|----|---|---|---|
| 0,4663601  | 0,24723864 | 1,68868292 | 0 | 0 | 0 | 3  | 1  | 0 | 0 | 0 |
| 0,55864707 | 0,43252031 | 1,47486101 | 0 | 0 | 0 | 3  | 3  | 0 | 1 | 1 |
| 0,55784557 | 0,37011845 | 1,3953831  | 0 | 0 | 0 | 2  | 5  | 0 | 0 | 0 |
| 0,43533428 | 0,24865588 | 1,58088551 | 0 | 1 | 0 | 4  | 0  | 0 | 1 | 0 |
| 0,43533428 | 0,24865588 | 1,58088551 | 0 | 0 | 0 | 1  | 0  | 0 | 0 | 0 |
| 0,43533428 | 0,24865588 | 1,58088551 | 0 | 1 | 0 | 2  | 1  | 1 | 3 | 1 |
| 0,50996195 | 0,30631443 | 1,50706735 | 0 | 0 | 0 | 6  | 0  | 0 | 3 | 0 |
| 0,55807066 | 0,32204794 | 1,38891036 | 0 | 2 | 0 | 0  | 0  | 0 | 1 | 0 |
| 0,6202689  | 0,36890684 | 1,09678804 | 0 | 0 | 0 | 0  | 5  | 1 | 0 | 0 |
| 0,47257457 | 0,26284783 | 1,56306046 | 0 | 0 | 0 | 0  | 1  | 0 | 0 | 0 |
| 0,55224637 | 0,30437296 | 1,40211412 | 0 | 0 | 0 | 11 | 22 | 0 | 0 | 0 |
| 0,48920846 | 0,28148222 | 1,64389811 | 0 | 0 | 0 | 3  | 4  | 0 | 0 | 0 |
| 0,51136778 | 0,30939782 | 1,53527913 | 0 | 0 | 0 | 4  | 5  | 0 | 0 | 0 |
| 0,54012707 | 0,26362051 | 1,51462173 | 0 | 0 | 0 | 9  | 8  | 0 | 0 | 0 |
| 0,54012707 | 0,26362051 | 1,51462173 | 0 | 0 | 0 | 12 | 15 | 0 | 0 | 0 |
| 0,54012707 | 0,26362051 | 1,51462173 | 0 | 0 | 0 | 4  | 4  | 0 | 0 | 0 |
| 0,55710416 | 0,21597935 | 1,34794584 | 0 | 0 | 0 | 4  | 42 | 0 | 0 | 0 |
| 0,56747586 | 0,34357911 | 1,60195287 | 0 | 0 | 0 | 11 | 38 | 0 | 0 | 0 |
| 0,56932796 | 0,26239083 | 1,4214169  | 0 | 0 | 0 | 10 | 26 | 0 | 0 | 0 |

| tmedium     | tcoarse     | tloi        | aglmac | alpheu | ampeli | antaur | aontri | aricid | artbif | auscra |
|-------------|-------------|-------------|--------|--------|--------|--------|--------|--------|--------|--------|
| 0,505708516 | 0,207081264 | 0,16526874  | 0      | 0      | 0      | 0      | 3      | 0      | 0      | 0      |
| 0,630319217 | 0,374931387 | 0,130210037 | 0      | 0      | 0      | 1      | 4      | 0      | 0      | 0      |
| 0,499301567 | 0,228111176 | 0,163429647 | 0      | 0      | 0      | 0      | 0      | 0      | 0      | 0      |
| 0,500886221 | 0,192480072 | 0,149903376 | 0      | 0      | 0      | 1      | 3      | 0      | 0      | 0      |
| 0,557602724 | 0,27106553  | 0,14217258  | 0      | 0      | 0      | 0      | 4      | 0      | 5      | 0      |
| 0,543324077 | 0,322037778 | 0,143779552 | 0      | 0      | 0      | 0      | 1      | 0      | 0      | 0      |
| 0,543324077 | 0,322037778 | 0,143779552 | 0      | 0      | 0      | 3      | 4      | 0      | 0      | 0      |
| 0,543324077 | 0,322037778 | 0,143779552 | 0      | 0      | 0      | 0      | 6      | 0      | 0      | 0      |

|             |             |             |   |   |   |    |    |   |   |   |
|-------------|-------------|-------------|---|---|---|----|----|---|---|---|
| 0,632438366 | 0,366872019 | 0,162964031 | 0 | 0 | 0 | 0  | 20 | 0 | 0 | 0 |
| 0,633683827 | 0,346751889 | 0,146072299 | 0 | 0 | 0 | 3  | 7  | 0 | 3 | 0 |
| 0,59497074  | 0,216198715 | 0,107988844 | 0 | 0 | 0 | 1  | 1  | 0 | 0 | 0 |
| 0,53268689  | 0,129530209 | 0,113695753 | 0 | 0 | 0 | 0  | 2  | 1 | 0 | 0 |
| 0,563919968 | 0,129593003 | 0,103325892 | 0 | 0 | 0 | 16 | 6  | 0 | 0 | 0 |
| 0,57521813  | 0,160023933 | 0,120394762 | 0 | 0 | 0 | 1  | 1  | 0 | 0 | 0 |
| 0,576785042 | 0,169399024 | 0,123364204 | 0 | 0 | 0 | 1  | 2  | 1 | 0 | 0 |
| 0,548873758 | 0,174313509 | 0,134536015 | 0 | 0 | 0 | 0  | 0  | 1 | 1 | 1 |
| 0,548873758 | 0,174313509 | 0,134536015 | 0 | 0 | 0 | 0  | 0  | 0 | 0 | 0 |
| 0,548873758 | 0,174313509 | 0,134536015 | 0 | 0 | 0 | 0  | 1  | 0 | 0 | 0 |
| 0,602100753 | 0,226350726 | 0,101113926 | 0 | 0 | 0 | 0  | 3  | 0 | 0 | 0 |
| 0,570616193 | 0,183383101 | 0,114567657 | 0 | 0 | 0 | 0  | 9  | 0 | 0 | 0 |
| 0,611556537 | 0,328429771 | 0,142578641 | 0 | 0 | 0 | 0  | 4  | 0 | 0 | 0 |
| 0,51259107  | 0,246010312 | 0,152860721 | 0 | 0 | 0 | 0  | 5  | 0 | 0 | 0 |
| 0,65095881  | 0,424791082 | 0,122846912 | 0 | 0 | 0 | 1  | 6  | 0 | 0 | 0 |
| 0,637606881 | 0,374751172 | 0,156012849 | 0 | 0 | 0 | 0  | 9  | 0 | 0 | 0 |
| 0,619184302 | 0,336227006 | 0,153017962 | 0 | 0 | 0 | 2  | 9  | 0 | 1 | 0 |
| 0,600192657 | 0,33691079  | 0,147856022 | 0 | 0 | 0 | 1  | 8  | 0 | 0 | 0 |
| 0,600192657 | 0,33691079  | 0,147856022 | 0 | 0 | 0 | 0  | 11 | 0 | 0 | 0 |
| 0,600192657 | 0,33691079  | 0,147856022 | 0 | 0 | 0 | 1  | 7  | 0 | 0 | 0 |
| 0,481677972 | 0,225773515 | 0,154076712 | 0 | 0 | 0 | 0  | 0  | 0 | 0 | 0 |
| 0,506957563 | 0,224637817 | 0,139628219 | 0 | 0 | 0 | 0  | 0  | 0 | 0 | 0 |
| 0,522334378 | 0,261028983 | 0,158133658 | 0 | 0 | 0 | 0  | 4  | 0 | 0 | 0 |
| 0,55503914  | 0,285794645 | 0,152718522 | 0 | 0 | 0 | 0  | 3  | 0 | 0 | 0 |
| 0,519393489 | 0,299594525 | 0,15385889  | 0 | 0 | 0 | 1  | 3  | 0 | 0 | 0 |
| 0,539307967 | 0,379829421 | 0,152037359 | 0 | 0 | 0 | 2  | 4  | 0 | 0 | 0 |
| 0,554605882 | 0,315729167 | 0,190778724 | 0 | 0 | 0 | 0  | 1  | 0 | 0 | 0 |
| 0,519016747 | 0,303880546 | 0,151451181 | 0 | 0 | 0 | 0  | 0  | 0 | 0 | 0 |
| 0,519016747 | 0,303880546 | 0,151451181 | 0 | 0 | 0 | 0  | 0  | 0 | 0 | 0 |

|             |             |             |   |   |   |   |   |   |   |   |
|-------------|-------------|-------------|---|---|---|---|---|---|---|---|
| 0,519016747 | 0,303880546 | 0,151451181 | 0 | 0 | 0 | 0 | 0 | 0 | 0 | 0 |
| 0,53138522  | 0,257041531 | 0,130581345 | 0 | 0 | 0 | 0 | 1 | 0 | 0 | 0 |
| 0,551864199 | 0,327093757 | 0,134793564 | 0 | 0 | 0 | 0 | 0 | 2 | 0 | 0 |
| 0,520446922 | 0,225961911 | 0,134543839 | 0 | 0 | 0 | 1 | 1 | 0 | 0 | 0 |
| 0,501640106 | 0,201607164 | 0,14031544  | 0 | 0 | 0 | 1 | 0 | 0 | 0 | 0 |
| 0,467895253 | 0,167128598 | 0,157395451 | 0 | 0 | 0 | 0 | 0 | 0 | 0 | 0 |
| 0,505387304 | 0,193928684 | 0,135988435 | 0 | 0 | 0 | 0 | 0 | 1 | 0 | 0 |
| 0,510741207 | 0,23002403  | 0,119409382 | 0 | 0 | 0 | 1 | 1 | 0 | 0 | 0 |
| 0,437194961 | 0,089055737 | 0,137882799 | 0 | 0 | 0 | 0 | 0 | 0 | 0 | 0 |
| 0,437194961 | 0,089055737 | 0,137882799 | 0 | 0 | 0 | 1 | 0 | 0 | 0 | 0 |
| 0,437194961 | 0,089055737 | 0,137882799 | 0 | 0 | 0 | 2 | 0 | 0 | 0 | 0 |
| 0,49617326  | 0,193946372 | 0,139586311 | 0 | 0 | 0 | 0 | 0 | 0 | 0 | 0 |
| 0,477208727 | 0,209204391 | 0,127131297 | 0 | 0 | 0 | 1 | 0 | 0 | 0 | 0 |
| 0,52660561  | 0,205811665 | 0,158248305 | 0 | 0 | 0 | 2 | 0 | 0 | 0 | 0 |
| 0,514930503 | 0,202706714 | 0,132469492 | 0 | 0 | 0 | 0 | 0 | 0 | 0 | 0 |
| 0,493400318 | 0,197098823 | 0,137051108 | 0 | 0 | 0 | 1 | 0 | 0 | 0 | 0 |
| 0,514841607 | 0,249000939 | 0,126243645 | 0 | 0 | 0 | 0 | 0 | 0 | 0 | 0 |
| 0,495951208 | 0,210842681 | 0,121201649 | 0 | 0 | 0 | 0 | 0 | 0 | 0 | 0 |
| 0,474621671 | 0,216824476 | 0,125084816 | 0 | 0 | 0 | 0 | 0 | 2 | 0 | 0 |
| 0,474621671 | 0,216824476 | 0,125084816 | 0 | 0 | 0 | 0 | 0 | 0 | 0 | 0 |
| 0,474621671 | 0,216824476 | 0,125084816 | 0 | 0 | 0 | 0 | 0 | 0 | 0 | 0 |
| 0,539559605 | 0,229805123 | 0,143326692 | 0 | 0 | 0 | 0 | 0 | 0 | 0 | 0 |
| 0,529998327 | 0,18854663  | 0,119485028 | 0 | 0 | 0 | 4 | 0 | 0 | 0 | 0 |
| 0,478063259 | 0,161381482 | 0,117461    | 0 | 0 | 0 | 4 | 0 | 0 | 0 | 0 |
| 0,546130119 | 0,17758193  | 0,134722319 | 0 | 0 | 0 | 0 | 3 | 0 | 0 | 0 |
| 0,492258812 | 0,141777756 | 0,130458479 | 0 | 0 | 0 | 0 | 0 | 0 | 0 | 0 |
| 0,505514411 | 0,197734432 | 0,119117175 | 0 | 0 | 0 | 0 | 0 | 0 | 0 | 0 |
| 0,540413854 | 0,268208227 | 0,139408308 | 0 | 0 | 0 | 1 | 0 | 0 | 0 | 0 |
| 0,494780633 | 0,205323138 | 0,127217142 | 0 | 0 | 0 | 4 | 0 | 0 | 0 | 0 |



|             |             |             |   |   |   |   |   |   |   |   |   |
|-------------|-------------|-------------|---|---|---|---|---|---|---|---|---|
| 0,494780633 | 0,205323138 | 0,127217142 | 0 | 0 | 0 | 0 | 0 | 0 | 0 | 0 | 0 |
| 0,494780633 | 0,205323138 | 0,127217142 | 0 | 0 | 0 | 1 | 2 | 0 | 0 | 0 | 0 |
| 0,488871475 | 0,183148322 | 0,133572435 | 0 | 0 | 0 | 0 | 3 | 0 | 0 | 0 | 0 |
| 0,480956271 | 0,176503028 | 0,116869852 | 0 | 0 | 0 | 6 | 0 | 0 | 0 | 0 | 0 |
| 0,559370793 | 0,215296219 | 0,140583927 | 0 | 0 | 0 | 0 | 0 | 0 | 0 | 0 | 0 |
| 0,536683147 | 0,130271463 | 0,114041674 | 0 | 0 | 0 | 1 | 2 | 0 | 1 | 0 | 0 |
| 0,516420141 | 0,151319274 | 0,129214889 | 0 | 0 | 0 | 0 | 4 | 0 | 0 | 0 | 0 |
| 0,54883354  | 0,1482991   | 0,127469383 | 0 | 0 | 0 | 1 | 9 | 0 | 0 | 0 | 0 |
| 0,553308005 | 0,196200895 | 0,121319949 | 0 | 0 | 0 | 0 | 2 | 0 | 0 | 0 | 0 |
| 0,514364649 | 0,12019323  | 0,114088765 | 0 | 0 | 0 | 5 | 2 | 0 | 0 | 0 | 0 |
| 0,514364649 | 0,12019323  | 0,114088765 | 0 | 0 | 0 | 1 | 1 | 0 | 0 | 0 | 0 |
| 0,514364649 | 0,12019323  | 0,114088765 | 0 | 0 | 0 | 0 | 0 | 0 | 0 | 0 | 0 |
| 0,558514121 | 0,119992753 | 0,120972555 | 0 | 0 | 0 | 0 | 0 | 0 | 0 | 0 | 0 |
| 0,518792317 | 0,091110395 | 0,119144292 | 0 | 0 | 0 | 0 | 0 | 0 | 1 | 0 | 0 |
| 0,521579385 | 0,09029593  | 0,128879791 | 0 | 0 | 0 | 0 | 2 | 0 | 0 | 0 | 0 |
| 0,50777514  | 0,066063497 | 0,112312597 | 0 | 0 | 0 | 0 | 3 | 0 | 0 | 0 | 0 |
| 0,560387132 | 0,148611234 | 0,111636947 | 0 | 0 | 0 | 0 | 5 | 0 | 0 | 0 | 0 |
| 0,535269812 | 0,111894487 | 0,125086513 | 0 | 0 | 0 | 5 | 1 | 0 | 0 | 0 | 0 |
| 0,539269274 | 0,100926403 | 0,127489604 | 0 | 0 | 0 | 1 | 1 | 0 | 0 | 0 | 0 |
| 0,520855351 | 0,069606464 | 0,142810551 | 0 | 0 | 0 | 1 | 1 | 0 | 0 | 0 | 0 |
| 0,520855351 | 0,069606464 | 0,142810551 | 0 | 0 | 0 | 0 | 0 | 0 | 0 | 0 | 0 |
| 0,520855351 | 0,069606464 | 0,142810551 | 0 | 0 | 0 | 4 | 0 | 0 | 0 | 0 | 0 |
| 0,550075805 | 0,17913357  | 0,119057666 | 0 | 0 | 0 | 3 | 2 | 0 | 0 | 0 | 0 |
| 0,545592607 | 0,099565023 | 0,123041433 | 0 | 0 | 0 | 2 | 2 | 0 | 0 | 0 | 0 |
| 0,500816419 | 0,059245716 | 0,117089883 | 0 | 0 | 0 | 4 | 2 | 0 | 0 | 0 | 0 |
| 0,568575005 | 0,160879448 | 0,136040131 | 0 | 0 | 0 | 1 | 3 | 0 | 0 | 0 | 0 |
| 0,527680997 | 0,070712791 | 0,127240025 | 0 | 0 | 0 | 7 | 3 | 0 | 0 | 0 | 0 |
| 0,548249304 | 0,160787656 | 0,130255469 | 0 | 0 | 0 | 7 | 2 | 0 | 0 | 0 | 0 |
| 0,543697985 | 0,105719234 | 0,109240533 | 0 | 0 | 0 | 1 | 3 | 0 | 1 | 0 | 0 |

|             |             |             |   |   |   |   |   |   |   |   |
|-------------|-------------|-------------|---|---|---|---|---|---|---|---|
| 0,563603812 | 0,135910948 | 0,10910005  | 0 | 0 | 0 | 4 | 1 | 0 | 1 | 0 |
| 0,563603812 | 0,135910948 | 0,10910005  | 0 | 0 | 0 | 5 | 8 | 0 | 2 | 0 |
| 0,563603812 | 0,135910948 | 0,10910005  | 0 | 0 | 0 | 0 | 9 | 0 | 1 | 0 |
| 0,553158026 | 0,204399665 | 0,133474589 | 0 | 0 | 0 | 0 | 0 | 0 | 2 | 0 |
| 0,569297897 | 0,190083849 | 0,134828403 | 0 | 0 | 0 | 0 | 4 | 1 | 0 | 0 |
| 0,526152913 | 0,175980797 | 0,128811555 | 0 | 0 | 0 | 0 | 1 | 0 | 0 | 0 |
| 0,587999887 | 0,222984764 | 0,117671412 | 0 | 0 | 0 | 0 | 4 | 0 | 0 | 0 |
| 0,520901917 | 0,182870172 | 0,117752096 | 1 | 0 | 0 | 0 | 3 | 1 | 1 | 0 |
| 0,517742058 | 0,111083987 | 0,135443475 | 0 | 0 | 0 | 0 | 0 | 1 | 0 | 0 |
| 0,59515094  | 0,204384621 | 0,117541354 | 0 | 0 | 0 | 1 | 3 | 5 | 0 | 0 |
| 0,59515094  | 0,204384621 | 0,117541354 | 0 | 0 | 0 | 0 | 3 | 1 | 0 | 0 |
| 0,59515094  | 0,204384621 | 0,117541354 | 0 | 0 | 0 | 0 | 7 | 1 | 0 | 0 |
| 0,560978676 | 0,197669995 | 0,1399654   | 0 | 0 | 0 | 0 | 0 | 0 | 0 | 0 |
| 0,626426305 | 0,271697374 | 0,125932357 | 0 | 0 | 0 | 0 | 2 | 0 | 1 | 0 |
| 0,630466959 | 0,274163351 | 0,123830273 | 0 | 0 | 0 | 1 | 5 | 0 | 1 | 0 |
| 0,595771477 | 0,257547102 | 0,116980457 | 0 | 0 | 0 | 0 | 0 | 0 | 1 | 0 |
| 0,579854883 | 0,160825398 | 0,11774631  | 0 | 0 | 0 | 8 | 2 | 0 | 0 | 0 |
| 0,615052587 | 0,27733041  | 0,13227053  | 0 | 0 | 0 | 0 | 0 | 0 | 0 | 1 |
| 0,576778042 | 0,213378862 | 0,131289759 | 0 | 0 | 0 | 0 | 0 | 0 | 0 | 0 |
| 0,556209791 | 0,130257487 | 0,129306068 | 0 | 0 | 0 | 1 | 1 | 0 | 0 | 0 |
| 0,556209791 | 0,130257487 | 0,129306068 | 0 | 0 | 0 | 2 | 0 | 0 | 0 | 0 |
| 0,556209791 | 0,130257487 | 0,129306068 | 0 | 0 | 0 | 3 | 0 | 0 | 0 | 0 |
| 0,589044419 | 0,194638045 | 0,125966139 | 0 | 0 | 0 | 0 | 9 | 0 | 0 | 0 |
| 0,593708827 | 0,166246079 | 0,126068395 | 0 | 0 | 0 | 8 | 5 | 0 | 0 | 0 |
| 0,613404236 | 0,184495917 | 0,105780351 | 0 | 0 | 0 | 5 | 7 | 0 | 0 | 0 |
| 0,612799484 | 0,183948612 | 0,10460922  | 0 | 0 | 0 | 2 | 0 | 0 | 0 | 0 |
| 0,63310425  | 0,216976883 | 0,102373932 | 0 | 0 | 0 | 4 | 1 | 0 | 0 | 0 |
| 0,602198119 | 0,18001363  | 0,105711801 | 0 | 0 | 0 | 9 | 6 | 0 | 3 | 0 |
| 0,602702294 | 0,214196244 | 0,121534484 | 0 | 0 | 0 | 0 | 3 | 0 | 0 | 0 |

|             |             |             |   |   |   |   |   |   |   |   |
|-------------|-------------|-------------|---|---|---|---|---|---|---|---|
| 0,601458531 | 0,186013055 | 0,10625794  | 0 | 0 | 0 | 6 | 1 | 0 | 0 | 0 |
| 0,601458531 | 0,186013055 | 0,10625794  | 0 | 0 | 0 | 3 | 2 | 0 | 0 | 0 |
| 0,601458531 | 0,186013055 | 0,10625794  | 0 | 0 | 0 | 0 | 2 | 0 | 1 | 0 |
| 0,57879831  | 0,160854433 | 0,128265015 | 0 | 0 | 0 | 1 | 0 | 0 | 0 | 0 |
| 0,591802798 | 0,17016132  | 0,127020528 | 0 | 0 | 0 | 4 | 4 | 0 | 0 | 0 |
| 0,61617519  | 0,244573289 | 0,101011412 | 0 | 0 | 0 | 3 | 5 | 0 | 0 | 0 |
| 0,610508343 | 0,196872541 | 0,11913726  | 0 | 0 | 0 | 0 | 3 | 0 | 1 | 0 |
| 0,553188784 | 0,220935579 | 0,123589279 | 0 | 0 | 0 | 0 | 1 | 0 | 0 | 0 |
| 0,586226127 | 0,174924821 | 0,108831376 | 0 | 0 | 0 | 1 | 2 | 0 | 0 | 0 |
| 0,521213797 | 0,174246988 | 0,127031868 | 0 | 0 | 0 | 2 | 4 | 0 | 0 | 0 |
| 0,611612803 | 0,271499667 | 0,113091121 | 0 | 0 | 0 | 5 | 0 | 0 | 0 | 0 |
| 0,611612803 | 0,271499667 | 0,113091121 | 0 | 0 | 0 | 2 | 3 | 0 | 0 | 0 |
| 0,611612803 | 0,271499667 | 0,113091121 | 0 | 0 | 0 | 3 | 1 | 0 | 1 | 0 |
| 0,600319558 | 0,277356441 | 0,104124085 | 0 | 0 | 0 | 1 | 0 | 0 | 0 | 0 |
| 0,563797546 | 0,234785671 | 0,133181276 | 0 | 0 | 0 | 1 | 5 | 0 | 0 | 0 |
| 0,515195384 | 0,201168384 | 0,133380618 | 0 | 0 | 0 | 0 | 1 | 0 | 0 | 0 |
| 0,526684431 | 0,190893417 | 0,116129521 | 0 | 0 | 0 | 0 | 2 | 0 | 0 | 0 |
| 0,562374374 | 0,257385043 | 0,130836288 | 0 | 0 | 0 | 0 | 1 | 0 | 0 | 0 |
| 0,595599441 | 0,277377572 | 0,122250169 | 0 | 0 | 0 | 1 | 1 | 0 | 0 | 0 |
| 0,538859206 | 0,200103634 | 0,119200795 | 0 | 0 | 0 | 0 | 2 | 0 | 0 | 0 |
| 0,549309413 | 0,257446377 | 0,123886515 | 0 | 0 | 0 | 0 | 0 | 0 | 0 | 0 |
| 0,549309413 | 0,257446377 | 0,123886515 | 0 | 0 | 0 | 0 | 0 | 0 | 0 | 0 |
| 0,549309413 | 0,257446377 | 0,123886515 | 0 | 0 | 0 | 2 | 0 | 0 | 0 | 0 |
| 0,564819319 | 0,237499171 | 0,115186657 | 0 | 0 | 0 | 0 | 0 | 0 | 0 | 0 |
| 0,616969543 | 0,351964314 | 0,112292842 | 0 | 0 | 0 | 0 | 0 | 0 | 0 | 0 |
| 0,558248399 | 0,261430256 | 0,123458873 | 0 | 0 | 0 | 0 | 2 | 0 | 0 | 0 |
| 0,559879032 | 0,258813896 | 0,128506117 | 0 | 0 | 0 | 3 | 1 | 0 | 0 | 0 |
| 0,524791339 | 0,210112759 | 0,132641199 | 0 | 0 | 0 | 0 | 0 | 0 | 0 | 0 |
| 0,580345349 | 0,267388326 | 0,105561303 | 0 | 0 | 0 | 0 | 4 | 0 | 0 | 0 |

|             |             |             |   |   |   |   |   |   |   |   |
|-------------|-------------|-------------|---|---|---|---|---|---|---|---|
| 0,574708781 | 0,252966192 | 0,113110874 | 0 | 0 | 0 | 2 | 1 | 0 | 0 | 0 |
| 0,563974643 | 0,249214015 | 0,129602874 | 0 | 0 | 0 | 3 | 2 | 0 | 0 | 0 |
| 0,563974643 | 0,249214015 | 0,129602874 | 0 | 0 | 0 | 0 | 2 | 0 | 0 | 0 |
| 0,563974643 | 0,249214015 | 0,129602874 | 0 | 0 | 0 | 3 | 4 | 0 | 0 | 0 |
| 0,568548998 | 0,242367332 | 0,139461238 | 0 | 0 | 0 | 1 | 3 | 0 | 1 | 0 |
| 0,566259082 | 0,229476568 | 0,12196824  | 0 | 0 | 0 | 1 | 1 | 0 | 0 | 0 |
| 0,530484466 | 0,196797381 | 0,129554097 | 0 | 0 | 0 | 0 | 0 | 0 | 0 | 0 |
| 0,501167381 | 0,17406129  | 0,139468611 | 0 | 0 | 0 | 0 | 2 | 0 | 0 | 0 |
| 0,463337037 | 0,14566878  | 0,132547185 | 0 | 0 | 0 | 3 | 0 | 0 | 0 | 0 |
| 0,499546677 | 0,185138282 | 0,11952693  | 0 | 0 | 0 | 0 | 1 | 0 | 0 | 0 |
| 0,492345962 | 0,183658616 | 0,130011354 | 0 | 0 | 0 | 0 | 0 | 0 | 0 | 0 |
| 0,525401008 | 0,21306893  | 0,121069515 | 0 | 0 | 0 | 1 | 0 | 0 | 0 | 0 |
| 0,525401008 | 0,21306893  | 0,121069515 | 0 | 0 | 0 | 0 | 0 | 0 | 0 | 0 |
| 0,525401008 | 0,21306893  | 0,121069515 | 0 | 0 | 0 | 0 | 3 | 0 | 1 | 0 |
| 0,493195079 | 0,184364175 | 0,146745637 | 0 | 0 | 0 | 1 | 0 | 0 | 2 | 0 |
| 0,49666217  | 0,190645773 | 0,120349297 | 0 | 0 | 0 | 2 | 4 | 0 | 0 | 0 |
| 0,513070804 | 0,209236556 | 0,132023849 | 0 | 0 | 0 | 0 | 3 | 0 | 0 | 0 |
| 0,51030985  | 0,189273774 | 0,14228828  | 0 | 0 | 0 | 0 | 1 | 0 | 0 | 0 |
| 0,551665387 | 0,284828073 | 0,117782992 | 0 | 0 | 0 | 0 | 0 | 0 | 0 | 0 |
| 0,540613187 | 0,226110985 | 0,118054501 | 0 | 0 | 0 | 0 | 1 | 0 | 0 | 0 |
| 0,508806171 | 0,213362989 | 0,133547999 | 0 | 0 | 0 | 1 | 1 | 0 | 0 | 0 |
| 0,475496427 | 0,220807934 | 0,153828017 | 0 | 0 | 0 | 0 | 0 | 0 | 0 | 0 |
| 0,475496427 | 0,220807934 | 0,153828017 | 0 | 0 | 0 | 0 | 0 | 0 | 0 | 0 |
| 0,475496427 | 0,220807934 | 0,153828017 | 0 | 0 | 0 | 0 | 2 | 0 | 0 | 0 |
| 0,504933822 | 0,243955447 | 0,130776436 | 0 | 0 | 0 | 0 | 1 | 0 | 1 | 0 |
| 0,475241956 | 0,245587271 | 0,137150784 | 0 | 0 | 0 | 0 | 0 | 0 | 0 | 0 |
| 0,582300993 | 0,327621893 | 0,139069958 | 0 | 0 | 0 | 3 | 5 | 0 | 1 | 0 |
| 0,474096611 | 0,239387757 | 0,14404626  | 0 | 0 | 0 | 1 | 1 | 0 | 0 | 0 |
| 0,623048098 | 0,382200397 | 0,180099192 | 0 | 0 | 0 | 0 | 1 | 0 | 0 | 0 |

|             |             |             |   |   |   |   |    |   |   |   |
|-------------|-------------|-------------|---|---|---|---|----|---|---|---|
| 0,479121268 | 0,244348878 | 0,155309003 | 0 | 0 | 0 | 2 | 3  | 0 | 0 | 0 |
| 0,484391014 | 0,200200145 | 0,164457335 | 0 | 0 | 0 | 6 | 3  | 0 | 0 | 0 |
| 0,516361916 | 0,322539225 | 0,160876128 | 0 | 0 | 0 | 1 | 0  | 0 | 0 | 0 |
| 0,516361916 | 0,322539225 | 0,160876128 | 0 | 0 | 0 | 0 | 1  | 0 | 0 | 0 |
| 0,516361916 | 0,322539225 | 0,160876128 | 0 | 0 | 0 | 1 | 3  | 0 | 0 | 0 |
| 0,590604985 | 0,315791856 | 0,163619437 | 0 | 0 | 0 | 0 | 8  | 0 | 0 | 0 |
| 0,634122614 | 0,448737682 | 0,154392225 | 0 | 0 | 0 | 1 | 1  | 0 | 0 | 0 |
| 0,581946934 | 0,334577757 | 0,162979427 | 0 | 0 | 0 | 0 | 2  | 0 | 0 | 0 |
| 0,255936032 | 0,359482948 | 0,206526421 | 0 | 0 | 0 | 1 | 5  | 0 | 0 | 0 |
| 0,594585587 | 0,303166015 | 0,119342995 | 0 | 0 | 0 | 0 | 7  | 0 | 0 | 0 |
| 0,661826545 | 0,389838401 | 0,133864118 | 0 | 0 | 0 | 0 | 14 | 0 | 0 | 0 |
| 0,610640329 | 0,403291564 | 0,181501536 | 0 | 0 | 0 | 0 | 0  | 0 | 0 | 0 |
| 0,623060865 | 0,336008615 | 0,124879819 | 0 | 0 | 0 | 0 | 6  | 0 | 0 | 0 |
| 0,623060865 | 0,336008615 | 0,124879819 | 0 | 0 | 0 | 1 | 11 | 0 | 0 | 0 |
| 0,623060865 | 0,336008615 | 0,124879819 | 0 | 0 | 0 | 0 | 0  | 0 | 1 | 0 |
| 0,622255375 | 0,405202666 | 0,132618121 | 0 | 0 | 0 | 0 | 3  | 0 | 0 | 0 |
| 0,608080717 | 0,333473727 | 0,127351837 | 0 | 0 | 0 | 2 | 0  | 0 | 1 | 0 |
| 0,603443959 | 0,31958243  | 0,136019738 | 0 | 0 | 0 | 3 | 9  | 0 | 0 | 0 |
| 0,44301386  | 0,217992397 | 0,159926355 | 0 | 0 | 0 | 0 | 0  | 0 | 0 | 0 |
| 0,614554581 | 0,302510494 | 0,109365493 | 0 | 0 | 0 | 5 | 0  | 0 | 0 | 0 |
| 0,41311334  | 0,165864867 | 0,165148687 | 0 | 0 | 0 | 0 | 1  | 0 | 0 | 0 |
| 0,507077709 | 0,282012864 | 0,182059431 | 0 | 0 | 0 | 1 | 12 | 0 | 0 | 0 |
| 0,451834605 | 0,198737368 | 0,168891906 | 0 | 0 | 0 | 4 | 0  | 0 | 0 | 0 |
| 0,557117643 | 0,344681762 | 0,148594399 | 0 | 0 | 0 | 0 | 17 | 0 | 0 | 0 |
| 0,557117643 | 0,344681762 | 0,148594399 | 0 | 0 | 0 | 8 | 10 | 0 | 0 | 0 |
| 0,557117643 | 0,344681762 | 0,148594399 | 0 | 0 | 0 | 0 | 1  | 0 | 0 | 0 |
| 0,608657173 | 0,359092708 | 0,122532864 | 0 | 0 | 0 | 7 | 7  | 0 | 1 | 0 |
| 0,662075082 | 0,344352723 | 0,125624175 | 0 | 0 | 0 | 1 | 4  | 0 | 0 | 0 |
| 0,672940306 | 0,375249676 | 0,107906967 | 0 | 0 | 0 | 7 | 4  | 0 | 0 | 0 |

|             |             |             |   |   |   |    |    |   |   |   |
|-------------|-------------|-------------|---|---|---|----|----|---|---|---|
| 0,477807387 | 0,236355564 | 0,157332426 | 0 | 0 | 0 | 3  | 2  | 0 | 1 | 0 |
| 0,670135081 | 0,350033518 | 0,123436082 | 0 | 0 | 0 | 3  | 5  | 0 | 0 | 0 |
| 0,60177861  | 0,305775217 | 0,12142849  | 0 | 0 | 0 | 1  | 13 | 0 | 0 | 0 |
| 0,5954038   | 0,333224856 | 0,148709541 | 0 | 0 | 0 | 1  | 16 | 0 | 0 | 0 |
| 0,588466172 | 0,339456625 | 0,163602356 | 0 | 0 | 0 | 1  | 12 | 0 | 0 | 0 |
| 0,588466172 | 0,339456625 | 0,163602356 | 0 | 0 | 0 | 1  | 0  | 0 | 1 | 0 |
| 0,588466172 | 0,339456625 | 0,163602356 | 0 | 0 | 0 | 1  | 9  | 0 | 0 | 0 |
| 0,512012375 | 0,274228072 | 0,152822974 | 0 | 0 | 0 | 2  | 11 | 0 | 2 | 0 |
| 0,461761562 | 0,210425776 | 0,138752233 | 0 | 0 | 0 | 0  | 5  | 0 | 4 | 0 |
| 0,466598844 | 0,230947082 | 0,17449231  | 0 | 0 | 0 | 1  | 1  | 0 | 1 | 0 |
| 0,45138358  | 0,162137808 | 0,130809652 | 0 | 0 | 0 | 0  | 0  | 0 | 0 | 0 |
| 0,518127386 | 0,244849242 | 0,156870183 | 0 | 0 | 0 | 1  | 0  | 0 | 0 | 0 |
| 0,471003295 | 0,261222174 | 0,151237049 | 0 | 0 | 0 | 18 | 0  | 0 | 2 | 0 |
| 0,451228665 | 0,209941723 | 0,138029811 | 0 | 0 | 0 | 0  | 0  | 0 | 0 | 0 |
| 0,477512714 | 0,22045784  | 0,150879183 | 0 | 1 | 0 | 0  | 2  | 0 | 0 | 0 |
| 0,477512714 | 0,22045784  | 0,150879183 | 0 | 0 | 0 | 0  | 5  | 0 | 0 | 0 |
| 0,477512714 | 0,22045784  | 0,150879183 | 0 | 0 | 0 | 0  | 1  | 0 | 0 | 0 |
| 0,483291901 | 0,18868145  | 0,13177856  | 0 | 0 | 0 | 0  | 0  | 0 | 0 | 0 |
| 0,523256686 | 0,207056065 | 0,130154061 | 0 | 0 | 0 | 0  | 0  | 0 | 0 | 0 |
| 0,506019575 | 0,188268965 | 0,143830704 | 0 | 0 | 0 | 1  | 1  | 0 | 0 | 0 |
| 0,607450354 | 0,309253789 | 0,136751213 | 0 | 0 | 0 | 2  | 5  | 0 | 0 | 0 |
| 0,480046377 | 0,176840565 | 0,148533977 | 0 | 0 | 0 | 2  | 0  | 0 | 0 | 0 |
| 0,475225488 | 0,160451591 | 0,141746191 | 0 | 0 | 0 | 1  | 1  | 0 | 0 | 0 |
| 0,493255026 | 0,188055635 | 0,145772006 | 0 | 0 | 0 | 2  | 0  | 0 | 0 | 0 |
| 0,487332199 | 0,15848355  | 0,129952649 | 0 | 0 | 0 | 0  | 1  | 0 | 0 | 0 |
| 0,487332199 | 0,15848355  | 0,129952649 | 0 | 0 | 0 | 0  | 0  | 0 | 1 | 0 |
| 0,487332199 | 0,15848355  | 0,129952649 | 0 | 0 | 0 | 0  | 0  | 0 | 0 | 0 |
| 0,566769295 | 0,234296142 | 0,129777935 | 0 | 0 | 0 | 5  | 10 | 0 | 1 | 0 |
| 0,587828058 | 0,240677541 | 0,130606671 | 0 | 0 | 0 | 3  | 3  | 0 | 0 | 0 |

|             |             |             |   |   |   |    |    |   |   |   |
|-------------|-------------|-------------|---|---|---|----|----|---|---|---|
| 0,54030482  | 0,211533216 | 0,129165186 | 0 | 0 | 0 | 3  | 6  | 0 | 0 | 0 |
| 0,574046247 | 0,27621532  | 0,110703305 | 0 | 0 | 0 | 0  | 0  | 0 | 0 | 0 |
| 0,587854494 | 0,243195604 | 0,104683293 | 0 | 0 | 0 | 5  | 2  | 0 | 0 | 0 |
| 0,556533568 | 0,223368499 | 0,137785587 | 0 | 0 | 0 | 0  | 7  | 0 | 0 | 0 |
| 0,560447212 | 0,24739526  | 0,137495319 | 0 | 0 | 0 | 0  | 3  | 0 | 0 | 0 |
| 0,565409252 | 0,246972414 | 0,114903273 | 0 | 0 | 0 | 2  | 2  | 0 | 0 | 0 |
| 0,565409252 | 0,246972414 | 0,114903273 | 0 | 0 | 0 | 1  | 8  | 0 | 0 | 0 |
| 0,565409252 | 0,246972414 | 0,114903273 | 0 | 0 | 0 | 10 | 5  | 0 | 0 | 0 |
| 0,548496122 | 0,287897802 | 0,138894994 | 0 | 0 | 0 | 0  | 0  | 0 | 0 | 0 |
| 0,542771758 | 0,290736558 | 0,128593306 | 0 | 0 | 0 | 4  | 10 | 0 | 0 | 0 |
| 0,56814117  | 0,253206769 | 0,1291388   | 0 | 0 | 0 | 1  | 3  | 0 | 0 | 0 |
| 0,586801768 | 0,244233682 | 0,123841123 | 0 | 0 | 0 | 3  | 4  | 0 | 0 | 0 |
| 0,566185748 | 0,268802281 | 0,12847472  | 0 | 0 | 0 | 2  | 2  | 0 | 0 | 0 |
| 0,585498773 | 0,281516845 | 0,128223625 | 0 | 0 | 0 | 0  | 2  | 0 | 0 | 0 |
| 0,554437889 | 0,232474828 | 0,124210265 | 0 | 0 | 0 | 0  | 0  | 0 | 0 | 0 |
| 0,567760319 | 0,271192954 | 0,119127218 | 0 | 0 | 0 | 0  | 6  | 0 | 0 | 0 |
| 0,567760319 | 0,271192954 | 0,119127218 | 0 | 0 | 0 | 1  | 3  | 0 | 0 | 0 |
| 0,567760319 | 0,271192954 | 0,119127218 | 0 | 0 | 0 | 2  | 6  | 0 | 0 | 0 |
| 0,57221169  | 0,20821006  | 0,112406659 | 0 | 0 | 0 | 0  | 1  | 0 | 0 | 0 |
| 0,577213525 | 0,217877333 | 0,124052443 | 0 | 0 | 0 | 0  | 3  | 0 | 0 | 0 |
| 0,629838299 | 0,293050291 | 0,116168442 | 0 | 0 | 0 | 0  | 4  | 0 | 0 | 0 |
| 0,617320422 | 0,221252182 | 0,123665523 | 0 | 0 | 0 | 1  | 0  | 0 | 0 | 0 |
| 0,635562499 | 0,359088452 | 0,101905287 | 0 | 0 | 0 | 0  | 0  | 0 | 0 | 0 |
| 0,605586757 | 0,275709319 | 0,115121648 | 0 | 0 | 0 | 1  | 1  | 0 | 0 | 0 |
| 0,597970772 | 0,257807205 | 0,111116795 | 0 | 0 | 0 | 5  | 2  | 0 | 0 | 0 |
| 0,552676731 | 0,271236017 | 0,115091848 | 0 | 0 | 0 | 1  | 0  | 0 | 0 | 0 |
| 0,552676731 | 0,271236017 | 0,115091848 | 0 | 0 | 0 | 0  | 1  | 0 | 1 | 0 |
| 0,552676731 | 0,271236017 | 0,115091848 | 0 | 0 | 0 | 9  | 3  | 0 | 0 | 0 |
| 0,633147961 | 0,229460224 | 0,123738454 | 0 | 0 | 0 | 4  | 1  | 0 | 0 | 0 |

|             |             |             |   |   |   |    |   |   |   |   |
|-------------|-------------|-------------|---|---|---|----|---|---|---|---|
| 0,59486905  | 0,238163512 | 0,117251896 | 0 | 0 | 0 | 6  | 2 | 0 | 0 | 0 |
| 0,63724777  | 0,238577384 | 0,10119475  | 0 | 0 | 0 | 1  | 2 | 0 | 0 | 0 |
| 0,610275101 | 0,197396656 | 0,120118904 | 0 | 0 | 1 | 5  | 2 | 0 | 1 | 0 |
| 0,587459072 | 0,1868224   | 0,113926718 | 0 | 0 | 0 | 0  | 0 | 0 | 0 | 0 |
| 0,629934936 | 0,257433339 | 0,11890469  | 0 | 0 | 0 | 4  | 4 | 0 | 0 | 0 |
| 0,636062195 | 0,247931342 | 0,110053988 | 0 | 0 | 0 | 1  | 3 | 0 | 1 | 0 |
| 0,606304917 | 0,223988909 | 0,111551648 | 0 | 0 | 0 | 4  | 6 | 0 | 0 | 0 |
| 0,606304917 | 0,223988909 | 0,111551648 | 0 | 0 | 0 | 3  | 0 | 0 | 3 | 0 |
| 0,606304917 | 0,223988909 | 0,111551648 | 0 | 0 | 0 | 8  | 2 | 0 | 0 | 0 |
| 0,648417472 | 0,314346237 | 0,106183099 | 0 | 0 | 0 | 7  | 4 | 0 | 1 | 0 |
| 0,624346403 | 0,22878376  | 0,130350048 | 0 | 0 | 0 | 3  | 1 | 0 | 1 | 0 |
| 0,617540631 | 0,225272698 | 0,120550951 | 0 | 0 | 0 | 0  | 0 | 0 | 1 | 0 |
| 0,612145138 | 0,316672029 | 0,111412222 | 0 | 0 | 0 | 0  | 0 | 0 | 0 | 1 |
| 0,616842815 | 0,230967322 | 0,118623263 | 0 | 0 | 0 | 3  | 1 | 0 | 0 | 0 |
| 0,576903389 | 0,167029139 | 0,133618037 | 0 | 0 | 0 | 2  | 2 | 0 | 1 | 0 |
| 0,633720816 | 0,256014337 | 0,116172481 | 0 | 0 | 0 | 12 | 0 | 0 | 0 | 0 |
| 0,635113216 | 0,279370918 | 0,123339389 | 0 | 0 | 0 | 0  | 4 | 0 | 0 | 0 |
| 0,635113216 | 0,279370918 | 0,123339389 | 0 | 0 | 0 | 1  | 1 | 0 | 0 | 0 |
| 0,635113216 | 0,279370918 | 0,123339389 | 0 | 0 | 0 | 0  | 5 | 0 | 1 | 0 |
| 0,633578512 | 0,296388091 | 0,117686593 | 0 | 0 | 0 | 0  | 0 | 0 | 1 | 0 |
| 0,593405794 | 0,261472627 | 0,117212296 | 0 | 0 | 0 | 0  | 1 | 0 | 1 | 0 |
| 0,619003492 | 0,278804306 | 0,13282663  | 0 | 0 | 0 | 0  | 1 | 0 | 4 | 0 |
| 0,570989006 | 0,189961168 | 0,120383733 | 0 | 0 | 0 | 0  | 1 | 0 | 0 | 0 |
| 0,565378525 | 0,204006032 | 0,141566322 | 0 | 0 | 0 | 0  | 0 | 0 | 6 | 0 |
| 0,586219508 | 0,234633273 | 0,125251651 | 0 | 0 | 0 | 0  | 0 | 1 | 0 | 0 |
| 0,59706422  | 0,269891625 | 0,126342521 | 0 | 0 | 0 | 0  | 1 | 0 | 0 | 0 |
| 0,628818732 | 0,233809525 | 0,115062347 | 0 | 0 | 0 | 0  | 6 | 0 | 0 | 0 |
| 0,628818732 | 0,233809525 | 0,115062347 | 0 | 0 | 0 | 0  | 3 | 1 | 0 | 0 |
| 0,628818732 | 0,233809525 | 0,115062347 | 0 | 0 | 0 | 0  | 6 | 2 | 0 | 0 |



|             |             |             |   |   |   |   |   |   |   |   |
|-------------|-------------|-------------|---|---|---|---|---|---|---|---|
| 0,541059522 | 0,134119002 | 0,11611766  | 0 | 0 | 0 | 0 | 2 | 0 | 0 | 0 |
| 0,541359263 | 0,171912358 | 0,123928792 | 0 | 0 | 0 | 0 | 1 | 0 | 0 | 0 |
| 0,599063192 | 0,24939513  | 0,115181226 | 0 | 0 | 0 | 0 | 0 | 0 | 0 | 0 |
| 0,632940295 | 0,293579396 | 0,110722156 | 0 | 0 | 0 | 0 | 1 | 1 | 0 | 0 |
| 0,56750432  | 0,244086627 | 0,111441949 | 0 | 0 | 0 | 0 | 0 | 0 | 0 | 0 |
| 0,591272862 | 0,253930111 | 0,115413772 | 0 | 0 | 0 | 0 | 0 | 1 | 0 | 0 |
| 0,599657348 | 0,257077544 | 0,129711876 | 0 | 0 | 0 | 1 | 0 | 2 | 0 | 0 |
| 0,599657348 | 0,257077544 | 0,129711876 | 0 | 0 | 0 | 0 | 0 | 0 | 0 | 0 |
| 0,599657348 | 0,257077544 | 0,129711876 | 0 | 0 | 0 | 1 | 2 | 0 | 0 | 0 |
| 0,568092331 | 0,249293494 | 0,140288141 | 0 | 0 | 0 | 0 | 0 | 1 | 0 | 0 |
| 0,592088086 | 0,303892927 | 0,122435143 | 0 | 0 | 0 | 0 | 0 | 1 | 1 | 0 |
| 0,605144283 | 0,310718869 | 0,117904014 | 0 | 0 | 0 | 0 | 0 | 0 | 0 | 0 |
| 0,616939451 | 0,326531649 | 0,117588099 | 0 | 0 | 0 | 0 | 1 | 1 | 0 | 0 |
| 0,636114301 | 0,277298927 | 0,117340777 | 0 | 0 | 0 | 7 | 3 | 0 | 0 | 0 |
| 0,617562873 | 0,285271232 | 0,126457867 | 0 | 0 | 0 | 0 | 0 | 2 | 0 | 0 |
| 0,616441472 | 0,291431765 | 0,135792233 | 0 | 0 | 0 | 0 | 0 | 1 | 0 | 0 |
| 0,593711199 | 0,238403761 | 0,13240058  | 0 | 0 | 0 | 0 | 0 | 0 | 1 | 0 |
| 0,593711199 | 0,238403761 | 0,13240058  | 0 | 0 | 0 | 0 | 0 | 0 | 0 | 0 |
| 0,593711199 | 0,238403761 | 0,13240058  | 0 | 0 | 0 | 0 | 0 | 0 | 0 | 0 |
| 0,576752993 | 0,223263042 | 0,134156275 | 0 | 0 | 0 | 0 | 0 | 0 | 0 | 0 |
| 0,615581175 | 0,270238229 | 0,132149695 | 0 | 0 | 0 | 7 | 1 | 0 | 0 | 0 |
| 0,590489745 | 0,20716201  | 0,129385305 | 0 | 0 | 0 | 3 | 2 | 0 | 1 | 0 |
| 0,59713186  | 0,241369354 | 0,122346839 | 0 | 0 | 0 | 2 | 0 | 0 | 0 | 0 |
| 0,638868429 | 0,258196153 | 0,123297815 | 0 | 0 | 0 | 9 | 8 | 0 | 0 | 0 |
| 0,590286912 | 0,234132105 | 0,117247033 | 0 | 0 | 0 | 5 | 0 | 0 | 1 | 0 |
| 0,647815213 | 0,263399917 | 0,103348893 | 0 | 0 | 0 | 4 | 2 | 0 | 0 | 0 |
| 0,615605674 | 0,215583288 | 0,120757711 | 0 | 0 | 0 | 5 | 4 | 0 | 0 | 0 |
| 0,615605674 | 0,215583288 | 0,120757711 | 0 | 0 | 0 | 3 | 0 | 0 | 2 | 0 |
| 0,615605674 | 0,215583288 | 0,120757711 | 0 | 0 | 0 | 5 | 1 | 0 | 0 | 0 |

|             |             |             |   |   |   |    |    |   |   |   |
|-------------|-------------|-------------|---|---|---|----|----|---|---|---|
| 0,653454953 | 0,264644388 | 0,108042867 | 0 | 0 | 0 | 6  | 0  | 0 | 0 | 0 |
| 0,638926713 | 0,271979481 | 0,119885465 | 0 | 0 | 0 | 8  | 3  | 0 | 0 | 0 |
| 0,6482094   | 0,271773644 | 0,108560145 | 0 | 0 | 0 | 5  | 4  | 0 | 0 | 0 |
| 0,649744382 | 0,278016457 | 0,104819848 | 0 | 0 | 0 | 8  | 3  | 0 | 0 | 0 |
| 0,626299126 | 0,26897933  | 0,111865554 | 0 | 0 | 0 | 3  | 8  | 0 | 2 | 0 |
| 0,610424994 | 0,294055213 | 0,120053027 | 0 | 0 | 0 | 9  | 4  | 0 | 0 | 0 |
| 0,612415375 | 0,290793157 | 0,114684841 | 0 | 0 | 0 | 6  | 0  | 0 | 1 | 0 |
| 0,65384864  | 0,326693557 | 0,110095934 | 0 | 0 | 0 | 1  | 15 | 0 | 0 | 0 |
| 0,65384864  | 0,326693557 | 0,110095934 | 0 | 0 | 0 | 6  | 4  | 0 | 0 | 0 |
| 0,65384864  | 0,326693557 | 0,110095934 | 0 | 0 | 0 | 5  | 4  | 0 | 0 | 0 |
| 0,66453331  | 0,369056667 | 0,11776371  | 0 | 0 | 0 | 9  | 6  | 0 | 0 | 0 |
| 0,63929068  | 0,294313878 | 0,116416301 | 0 | 0 | 0 | 7  | 1  | 0 | 0 | 0 |
| 0,650501939 | 0,291358594 | 0,115145527 | 0 | 0 | 0 | 8  | 7  | 0 | 0 | 0 |
| 0,646989151 | 0,280879729 | 0,115997723 | 0 | 0 | 0 | 14 | 6  | 0 | 0 | 0 |
| 0,495954194 | 0,17432876  | 0,14092715  | 0 | 0 | 0 | 0  | 0  | 0 | 2 | 0 |
| 0,672832488 | 0,310661633 | 0,118777529 | 0 | 0 | 0 | 0  | 3  | 0 | 0 | 0 |
| 0,646760637 | 0,326448035 | 0,10462116  | 0 | 0 | 0 | 3  | 1  | 0 | 0 | 0 |
| 0,646760637 | 0,326448035 | 0,10462116  | 0 | 0 | 0 | 2  | 2  | 0 | 2 | 0 |
| 0,646760637 | 0,326448035 | 0,10462116  | 0 | 0 | 0 | 2  | 1  | 0 | 0 | 0 |
| 0,505962727 | 0,19365807  | 0,13982258  | 0 | 0 | 0 | 11 | 2  | 0 | 0 | 0 |
| 0,494555901 | 0,218154239 | 0,143765835 | 0 | 0 | 0 | 4  | 3  | 0 | 0 | 0 |
| 0,503151747 | 0,164409683 | 0,124303328 | 0 | 0 | 0 | 0  | 0  | 0 | 0 | 0 |
| 0,485276793 | 0,119844823 | 0,139344018 | 0 | 0 | 0 | 3  | 0  | 0 | 0 | 0 |
| 0,513454671 | 0,227526586 | 0,116531529 | 0 | 0 | 0 | 0  | 2  | 0 | 0 | 0 |
| 0,511077761 | 0,205320207 | 0,130569377 | 0 | 0 | 0 | 4  | 0  | 0 | 1 | 0 |
| 0,47477086  | 0,141309944 | 0,115852801 | 0 | 0 | 0 | 1  | 0  | 0 | 0 | 0 |
| 0,498091772 | 0,259522081 | 0,121740145 | 0 | 0 | 0 | 0  | 12 | 0 | 1 | 0 |
| 0,498091772 | 0,259522081 | 0,121740145 | 0 | 0 | 0 | 0  | 2  | 0 | 0 | 0 |
| 0,498091772 | 0,259522081 | 0,121740145 | 0 | 0 | 0 | 0  | 2  | 0 | 0 | 0 |

|             |             |             |   |   |   |   |    |   |   |   |
|-------------|-------------|-------------|---|---|---|---|----|---|---|---|
| 0,459539656 | 0,178789209 | 0,136553447 | 0 | 0 | 0 | 0 | 8  | 0 | 0 | 0 |
| 0,453661658 | 0,118834373 | 0,164945405 | 0 | 0 | 0 | 1 | 3  | 0 | 0 | 0 |
| 0,492743047 | 0,169367669 | 0,145687788 | 0 | 0 | 0 | 1 | 1  | 0 | 0 | 0 |
| 0,497289595 | 0,215899415 | 0,12931948  | 0 | 0 | 0 | 4 | 14 | 0 | 0 | 0 |
| 0,516512712 | 0,285544035 | 0,141983707 | 0 | 0 | 0 | 0 | 0  | 0 | 2 | 0 |
| 0,485806292 | 0,206736804 | 0,161351844 | 0 | 0 | 0 | 0 | 2  | 0 | 0 | 0 |
| 0,470051527 | 0,236151157 | 0,146318515 | 0 | 0 | 0 | 0 | 11 | 0 | 1 | 0 |
| 0,543919549 | 0,268022868 | 0,164316944 | 0 | 0 | 0 | 0 | 9  | 0 | 0 | 0 |
| 0,543919549 | 0,268022868 | 0,164316944 | 0 | 0 | 0 | 1 | 7  | 0 | 0 | 0 |
| 0,543919549 | 0,268022868 | 0,164316944 | 0 | 0 | 0 | 1 | 8  | 0 | 0 | 0 |
| 0,541108561 | 0,308662199 | 0,160732974 | 0 | 0 | 0 | 1 | 11 | 0 | 0 | 0 |
| 0,539982632 | 0,309260153 | 0,140976075 | 0 | 0 | 0 | 2 | 0  | 0 | 0 | 0 |
| 0,478062279 | 0,244583227 | 0,155580427 | 0 | 0 | 0 | 0 | 0  | 0 | 0 | 0 |
| 0,495374215 | 0,247184268 | 0,162030562 | 0 | 0 | 0 | 0 | 0  | 0 | 0 | 0 |
| 0,539046046 | 0,294453793 | 0,171392841 | 0 | 0 | 0 | 0 | 6  | 0 | 0 | 0 |
| 0,519865051 | 0,283643758 | 0,157512747 | 0 | 0 | 0 | 0 | 0  | 0 | 0 | 0 |
| 0,442270798 | 0,202968295 | 0,172010287 | 0 | 0 | 0 | 1 | 1  | 0 | 0 | 0 |
| 0,403351677 | 0,153471405 | 0,18180899  | 0 | 0 | 0 | 0 | 0  | 0 | 1 | 0 |
| 0,403351677 | 0,153471405 | 0,18180899  | 0 | 0 | 0 | 0 | 0  | 0 | 0 | 0 |
| 0,403351677 | 0,153471405 | 0,18180899  | 0 | 0 | 0 | 1 | 0  | 0 | 0 | 0 |
| 0,452170182 | 0,181805307 | 0,174954723 | 0 | 0 | 0 | 1 | 1  | 0 | 0 | 0 |
| 0,433068849 | 0,214458774 | 0,179464347 | 0 | 0 | 0 | 1 | 1  | 0 | 1 | 0 |
| 0,501140326 | 0,270051404 | 0,150582533 | 0 | 0 | 0 | 1 | 4  | 0 | 0 | 0 |
| 0,523496001 | 0,292698515 | 0,151176645 | 0 | 0 | 0 | 2 | 4  | 0 | 0 | 0 |
| 0,493120979 | 0,313977533 | 0,221576315 | 0 | 0 | 0 | 0 | 1  | 0 | 0 | 0 |
| 0,556365226 | 0,366406464 | 0,167757482 | 0 | 0 | 0 | 0 | 1  | 0 | 0 | 0 |
| 0,490826003 | 0,268270307 | 0,178102015 | 0 | 0 | 0 | 0 | 3  | 0 | 0 | 0 |
| 0,549075044 | 0,329560709 | 0,176948977 | 0 | 0 | 0 | 0 | 8  | 0 | 0 | 1 |
| 0,549075044 | 0,329560709 | 0,176948977 | 0 | 0 | 0 | 0 | 2  | 0 | 0 | 0 |

|             |             |             |   |   |   |   |    |   |   |   |
|-------------|-------------|-------------|---|---|---|---|----|---|---|---|
| 0,549075044 | 0,329560709 | 0,176948977 | 0 | 0 | 0 | 1 | 15 | 0 | 0 | 0 |
| 0,544227417 | 0,430194116 | 0,213253103 | 0 | 0 | 0 | 0 | 0  | 0 | 0 | 0 |
| 0,531785037 | 0,356768654 | 0,162953318 | 0 | 0 | 0 | 0 | 0  | 0 | 0 | 0 |
| 0,498743627 | 0,31399852  | 0,19730535  | 0 | 0 | 0 | 1 | 10 | 0 | 0 | 0 |
| 0,564524229 | 0,420221019 | 0,147199059 | 0 | 0 | 0 | 4 | 0  | 0 | 0 | 0 |
| 0,382869915 | 0,160530546 | 0,154495055 | 0 | 0 | 0 | 0 | 2  | 0 | 0 | 0 |
| 0,523026894 | 0,353104286 | 0,174655509 | 0 | 0 | 0 | 4 | 1  | 0 | 0 | 0 |
| 0,51344614  | 0,333111932 | 0,17716221  | 0 | 0 | 0 | 0 | 4  | 0 | 0 | 0 |
| 0,438803953 | 0,210532938 | 0,171485078 | 0 | 0 | 0 | 0 | 0  | 0 | 0 | 0 |
| 0,438803953 | 0,210532938 | 0,171485078 | 0 | 0 | 0 | 0 | 0  | 0 | 0 | 0 |
| 0,438803953 | 0,210532938 | 0,171485078 | 0 | 0 | 0 | 0 | 0  | 0 | 1 | 0 |
| 0,380844492 | 0,11506033  | 0,190107886 | 0 | 0 | 0 | 0 | 2  | 0 | 0 | 0 |
| 0,384964136 | 0,173535896 | 0,15577279  | 0 | 0 | 0 | 0 | 1  | 0 | 0 | 0 |
| 0,351646063 | 0,13009639  | 0,147276961 | 0 | 0 | 0 | 0 | 0  | 0 | 0 | 0 |



|   |   |    |    |   |   |    |   |   |   |   |
|---|---|----|----|---|---|----|---|---|---|---|
| 0 | 0 | 0  | 0  | 0 | 1 | 0  | 0 | 0 | 0 | 0 |
| 1 | 0 | 0  | 0  | 0 | 0 | 0  | 0 | 0 | 0 | 0 |
| 1 | 0 | 0  | 0  | 0 | 0 | 0  | 0 | 0 | 0 | 0 |
| 0 | 0 | 0  | 0  | 0 | 0 | 0  | 0 | 0 | 0 | 0 |
| 0 | 0 | 0  | 0  | 0 | 0 | 1  | 0 | 0 | 0 | 0 |
| 0 | 0 | 0  | 2  | 0 | 1 | 0  | 0 | 0 | 0 | 0 |
| 0 | 0 | 0  | 1  | 1 | 0 | 1  | 0 | 0 | 0 | 0 |
| 0 | 0 | 0  | 0  | 0 | 0 | 0  | 0 | 0 | 0 | 0 |
| 0 | 0 | 9  | 40 | 0 | 1 | 0  | 0 | 0 | 0 | 0 |
| 0 | 0 | 0  | 3  | 0 | 0 | 0  | 0 | 0 | 0 | 0 |
| 0 | 0 | 0  | 3  | 0 | 0 | 0  | 0 | 0 | 0 | 0 |
| 0 | 0 | 0  | 0  | 0 | 0 | 0  | 0 | 0 | 0 | 0 |
| 0 | 0 | 0  | 1  | 0 | 2 | 0  | 0 | 0 | 0 | 0 |
| 0 | 0 | 0  | 1  | 0 | 1 | 0  | 0 | 0 | 0 | 0 |
| 0 | 0 | 6  | 5  | 0 | 0 | 16 | 0 | 1 | 0 | 0 |
| 0 | 0 | 0  | 5  | 0 | 0 | 0  | 0 | 0 | 0 | 0 |
| 0 | 0 | 0  | 1  | 0 | 0 | 0  | 0 | 0 | 0 | 0 |
| 0 | 0 | 5  | 3  | 0 | 0 | 1  | 0 | 0 | 0 | 0 |
| 0 | 0 | 17 | 28 | 0 | 0 | 0  | 0 | 0 | 0 | 0 |
| 0 | 0 | 16 | 21 | 0 | 0 | 1  | 0 | 0 | 0 | 0 |
| 0 | 0 | 0  | 1  | 0 | 0 | 1  | 0 | 0 | 0 | 0 |
| 0 | 0 | 0  | 3  | 0 | 0 | 3  | 0 | 1 | 0 | 0 |
| 0 | 0 | 0  | 9  | 0 | 2 | 3  | 0 | 0 | 0 | 0 |
| 0 | 0 | 0  | 0  | 0 | 2 | 0  | 0 | 0 | 0 | 0 |
| 0 | 0 | 0  | 0  | 0 | 0 | 1  | 0 | 0 | 0 | 0 |
| 0 | 0 | 0  | 0  | 0 | 0 | 0  | 0 | 0 | 0 | 0 |
| 0 | 0 | 0  | 1  | 0 | 0 | 1  | 0 | 0 | 0 | 0 |
| 0 | 0 | 0  | 0  | 0 | 0 | 0  | 0 | 0 | 0 | 0 |
| 0 | 0 | 0  | 0  | 0 | 0 | 0  | 0 | 0 | 0 | 0 |
| 0 | 0 | 0  | 1  | 0 | 0 | 0  | 0 | 0 | 0 | 0 |
| 0 | 0 | 0  | 0  | 0 | 0 | 0  | 0 | 0 | 0 | 0 |
| 0 | 0 | 0  | 1  | 0 | 0 | 0  | 0 | 0 | 0 | 0 |

|   |   |   |    |   |   |    |   |   |   |   |
|---|---|---|----|---|---|----|---|---|---|---|
| 0 | 0 | 0 | 5  | 0 | 0 | 2  | 0 | 0 | 0 | 0 |
| 0 | 0 | 0 | 1  | 0 | 1 | 2  | 0 | 0 | 0 | 0 |
| 0 | 0 | 0 | 3  | 0 | 0 | 1  | 0 | 0 | 0 | 0 |
| 0 | 0 | 0 | 3  | 0 | 0 | 3  | 0 | 0 | 0 | 0 |
| 0 | 0 | 0 | 1  | 0 | 0 | 0  | 0 | 0 | 0 | 0 |
| 0 | 0 | 0 | 2  | 0 | 1 | 9  | 0 | 0 | 0 | 0 |
| 0 | 0 | 0 | 0  | 0 | 8 | 3  | 0 | 0 | 0 | 0 |
| 0 | 0 | 0 | 0  | 0 | 0 | 2  | 0 | 0 | 0 | 0 |
| 0 | 0 | 0 | 1  | 0 | 4 | 0  | 0 | 0 | 0 | 0 |
| 0 | 0 | 0 | 0  | 0 | 0 | 2  | 0 | 0 | 0 | 0 |
| 0 | 0 | 0 | 0  | 0 | 0 | 4  | 0 | 0 | 0 | 0 |
| 0 | 0 | 0 | 1  | 0 | 0 | 1  | 0 | 0 | 0 | 0 |
| 0 | 0 | 0 | 0  | 0 | 0 | 3  | 0 | 0 | 0 | 0 |
| 0 | 0 | 0 | 0  | 0 | 0 | 24 | 0 | 0 | 0 | 0 |
| 0 | 0 | 0 | 0  | 0 | 0 | 4  | 0 | 0 | 0 | 0 |
| 0 | 0 | 0 | 0  | 0 | 0 | 0  | 0 | 0 | 0 | 0 |
| 0 | 0 | 0 | 0  | 0 | 0 | 0  | 0 | 0 | 0 | 0 |
| 0 | 0 | 0 | 0  | 0 | 0 | 3  | 0 | 0 | 0 | 0 |
| 0 | 0 | 0 | 2  | 0 | 0 | 0  | 0 | 0 | 0 | 0 |
| 0 | 0 | 0 | 0  | 0 | 0 | 1  | 0 | 0 | 0 | 0 |
| 0 | 0 | 0 | 0  | 0 | 0 | 1  | 0 | 0 | 0 | 0 |
| 0 | 0 | 1 | 12 | 0 | 0 | 0  | 0 | 0 | 0 | 0 |
| 0 | 0 | 0 | 4  | 0 | 0 | 0  | 0 | 0 | 0 | 0 |
| 0 | 0 | 0 | 10 | 0 | 0 | 0  | 0 | 1 | 0 | 0 |
| 0 | 0 | 0 | 1  | 0 | 2 | 6  | 0 | 0 | 0 | 0 |
| 0 | 0 | 0 | 0  | 0 | 0 | 1  | 0 | 0 | 0 | 0 |
| 0 | 0 | 0 | 3  | 0 | 1 | 17 | 0 | 0 | 0 | 0 |
| 0 | 0 | 0 | 2  | 0 | 0 | 2  | 0 | 0 | 0 | 0 |
| 0 | 0 | 0 | 0  | 0 | 0 | 1  | 0 | 0 | 0 | 0 |

|   |   |   |    |   |    |    |   |   |   |   |
|---|---|---|----|---|----|----|---|---|---|---|
| 0 | 0 | 0 | 0  | 0 | 2  | 3  | 0 | 0 | 0 | 0 |
| 0 | 0 | 1 | 0  | 0 | 0  | 3  | 0 | 0 | 0 | 0 |
| 0 | 0 | 0 | 0  | 0 | 0  | 0  | 0 | 0 | 0 | 0 |
| 0 | 0 | 0 | 0  | 0 | 1  | 2  | 0 | 0 | 0 | 0 |
| 0 | 0 | 0 | 11 | 0 | 0  | 0  | 0 | 0 | 0 | 0 |
| 0 | 1 | 0 | 10 | 0 | 0  | 0  | 0 | 0 | 0 | 0 |
| 0 | 0 | 6 | 8  | 0 | 0  | 0  | 0 | 0 | 0 | 0 |
| 0 | 0 | 0 | 18 | 0 | 0  | 0  | 0 | 0 | 0 | 0 |
| 0 | 0 | 0 | 1  | 0 | 0  | 2  | 0 | 0 | 0 | 0 |
| 0 | 0 | 0 | 4  | 0 | 12 | 5  | 0 | 0 | 0 | 0 |
| 0 | 0 | 0 | 0  | 0 | 0  | 5  | 0 | 0 | 0 | 0 |
| 0 | 0 | 0 | 1  | 0 | 0  | 2  | 0 | 1 | 0 | 1 |
| 0 | 0 | 0 | 2  | 0 | 0  | 1  | 0 | 0 | 0 | 0 |
| 0 | 0 | 0 | 4  | 0 | 0  | 0  | 0 | 2 | 0 | 6 |
| 0 | 0 | 0 | 12 | 0 | 0  | 0  | 0 | 0 | 0 | 0 |
| 0 | 0 | 0 | 6  | 0 | 0  | 0  | 0 | 0 | 0 | 2 |
| 0 | 0 | 0 | 4  | 0 | 0  | 0  | 0 | 0 | 0 | 0 |
| 0 | 0 | 0 | 0  | 0 | 0  | 0  | 0 | 0 | 0 | 0 |
| 0 | 0 | 0 | 0  | 0 | 0  | 0  | 0 | 0 | 0 | 0 |
| 0 | 0 | 0 | 0  | 0 | 0  | 0  | 0 | 0 | 0 | 0 |
| 0 | 0 | 0 | 0  | 0 | 0  | 0  | 0 | 0 | 0 | 0 |
| 0 | 0 | 0 | 0  | 0 | 1  | 0  | 0 | 0 | 0 | 0 |
| 0 | 0 | 0 | 0  | 0 | 7  | 1  | 0 | 0 | 0 | 0 |
| 0 | 0 | 0 | 0  | 0 | 35 | 5  | 0 | 0 | 0 | 0 |
| 0 | 0 | 0 | 0  | 0 | 0  | 25 | 0 | 1 | 0 | 0 |
| 0 | 0 | 0 | 1  | 0 | 4  | 4  | 0 | 0 | 0 | 0 |
| 0 | 0 | 0 | 3  | 0 | 1  | 4  | 0 | 0 | 0 | 0 |
| 0 | 0 | 0 | 1  | 0 | 0  | 3  | 0 | 0 | 0 | 0 |
| 0 | 0 | 0 | 2  | 0 | 1  | 9  | 0 | 0 | 0 | 0 |



|   |   |    |    |   |   |   |   |   |   |   |
|---|---|----|----|---|---|---|---|---|---|---|
| 0 | 0 | 0  | 0  | 0 | 0 | 1 | 0 | 0 | 0 | 0 |
| 0 | 1 | 1  | 4  | 0 | 0 | 0 | 0 | 1 | 0 | 0 |
| 0 | 0 | 15 | 14 | 0 | 0 | 0 | 0 | 0 | 0 | 0 |
| 0 | 0 | 3  | 8  | 0 | 0 | 0 | 0 | 0 | 0 | 1 |
| 0 | 0 | 20 | 11 | 0 | 0 | 1 | 0 | 0 | 0 | 1 |
| 0 | 0 | 6  | 9  | 0 | 0 | 0 | 0 | 0 | 0 | 0 |
| 0 | 0 | 12 | 2  | 0 | 0 | 0 | 0 | 0 | 0 | 0 |
| 0 | 0 | 42 | 9  | 0 | 0 | 0 | 0 | 0 | 0 | 0 |
| 0 | 0 | 7  | 3  | 0 | 0 | 0 | 0 | 0 | 0 | 2 |
| 0 | 0 | 0  | 4  | 0 | 0 | 0 | 0 | 0 | 0 | 0 |
| 0 | 0 | 0  | 5  | 0 | 0 | 0 | 0 | 0 | 0 | 0 |
| 0 | 0 | 0  | 0  | 0 | 1 | 0 | 0 | 1 | 0 | 0 |
| 0 | 0 | 0  | 0  | 0 | 0 | 0 | 0 | 0 | 0 | 0 |
| 0 | 0 | 0  | 0  | 0 | 0 | 1 | 0 | 1 | 0 | 0 |
| 0 | 0 | 0  | 0  | 0 | 0 | 0 | 0 | 0 | 0 | 0 |
| 0 | 0 | 0  | 1  | 0 | 0 | 0 | 0 | 1 | 0 | 0 |
| 0 | 1 | 0  | 0  | 0 | 0 | 0 | 0 | 0 | 0 | 0 |
| 0 | 0 | 0  | 0  | 0 | 0 | 0 | 0 | 0 | 0 | 0 |
| 0 | 0 | 0  | 1  | 0 | 0 | 1 | 0 | 2 | 0 | 0 |
| 0 | 0 | 0  | 0  | 0 | 0 | 0 | 0 | 2 | 0 | 0 |
| 0 | 0 | 0  | 0  | 0 | 0 | 0 | 0 | 0 | 0 | 0 |
| 0 | 0 | 0  | 1  | 0 | 0 | 1 | 0 | 0 | 0 | 0 |
| 0 | 0 | 0  | 1  | 0 | 0 | 0 | 0 | 0 | 0 | 1 |
| 0 | 0 | 0  | 1  | 0 | 0 | 0 | 0 | 0 | 0 | 0 |
| 0 | 0 | 2  | 3  | 0 | 0 | 0 | 0 | 0 | 0 | 4 |
| 0 | 0 | 0  | 0  | 0 | 0 | 1 | 0 | 1 | 0 | 0 |
| 0 | 0 | 0  | 0  | 0 | 0 | 0 | 0 | 0 | 0 | 0 |
| 0 | 0 | 0  | 3  | 0 | 0 | 0 | 0 | 0 | 0 | 0 |
| 0 | 0 | 0  | 5  | 0 | 0 | 0 | 0 | 0 | 0 | 0 |

|   |   |    |    |   |   |   |   |   |   |   |
|---|---|----|----|---|---|---|---|---|---|---|
| 0 | 0 | 0  | 7  | 0 | 0 | 0 | 0 | 0 | 0 | 0 |
| 0 | 0 | 0  | 7  | 0 | 0 | 0 | 0 | 0 | 0 | 0 |
| 0 | 0 | 4  | 11 | 0 | 0 | 0 | 0 | 0 | 0 | 2 |
| 0 | 0 | 7  | 11 | 0 | 0 | 0 | 0 | 0 | 0 | 1 |
| 0 | 0 | 0  | 4  | 0 | 0 | 0 | 0 | 0 | 0 | 0 |
| 0 | 0 | 7  | 5  | 0 | 0 | 0 | 0 | 0 | 0 | 1 |
| 0 | 0 | 1  | 6  | 0 | 0 | 0 | 0 | 0 | 0 | 2 |
| 0 | 0 | 0  | 2  | 0 | 1 | 0 | 0 | 0 | 0 | 1 |
| 0 | 0 | 0  | 0  | 0 | 0 | 0 | 0 | 0 | 0 | 0 |
| 0 | 0 | 0  | 3  | 0 | 0 | 0 | 0 | 0 | 0 | 0 |
| 0 | 0 | 0  | 1  | 0 | 0 | 1 | 0 | 1 | 0 | 0 |
| 0 | 0 | 0  | 0  | 0 | 0 | 0 | 0 | 0 | 0 | 1 |
| 0 | 0 | 16 | 6  | 0 | 0 | 2 | 0 | 0 | 0 | 5 |
| 0 | 0 | 2  | 4  | 0 | 0 | 0 | 0 | 0 | 0 | 1 |
| 0 | 0 | 0  | 5  | 0 | 0 | 0 | 0 | 0 | 0 | 0 |
| 0 | 0 | 1  | 4  | 0 | 0 | 0 | 0 | 1 | 0 | 0 |
| 0 | 0 | 12 | 14 | 0 | 0 | 0 | 0 | 1 | 0 | 0 |
| 0 | 0 | 0  | 9  | 0 | 0 | 1 | 0 | 2 | 0 | 0 |
| 0 | 0 | 1  | 3  | 0 | 0 | 0 | 0 | 0 | 0 | 0 |
| 0 | 0 | 11 | 29 | 0 | 0 | 0 | 0 | 0 | 0 | 0 |
| 0 | 0 | 13 | 18 | 0 | 0 | 0 | 0 | 0 | 0 | 0 |
| 0 | 1 | 0  | 9  | 0 | 0 | 0 | 0 | 0 | 0 | 0 |
| 1 | 0 | 4  | 28 | 0 | 0 | 0 | 0 | 1 | 0 | 0 |
| 0 | 1 | 60 | 32 | 0 | 0 | 0 | 0 | 2 | 0 | 0 |
| 0 | 0 | 11 | 2  | 0 | 0 | 0 | 0 | 0 | 0 | 0 |
| 0 | 0 | 40 | 2  | 0 | 0 | 0 | 0 | 0 | 0 | 1 |
| 0 | 0 | 1  | 0  | 0 | 0 | 1 | 0 | 0 | 0 | 0 |
| 0 | 0 | 0  | 1  | 0 | 2 | 0 | 0 | 0 | 0 | 0 |
| 0 | 0 | 8  | 4  | 0 | 0 | 0 | 0 | 0 | 0 | 0 |



|   |   |    |   |   |   |   |   |   |   |   |
|---|---|----|---|---|---|---|---|---|---|---|
| 0 | 0 | 0  | 3 | 0 | 0 | 0 | 0 | 0 | 0 | 4 |
| 0 | 0 | 0  | 1 | 0 | 0 | 0 | 0 | 0 | 0 | 3 |
| 0 | 0 | 0  | 0 | 0 | 0 | 0 | 0 | 0 | 0 | 0 |
| 0 | 0 | 0  | 0 | 0 | 0 | 0 | 0 | 0 | 0 | 3 |
| 0 | 0 | 0  | 0 | 0 | 0 | 0 | 0 | 0 | 0 | 4 |
| 0 | 0 | 0  | 1 | 0 | 0 | 0 | 0 | 0 | 0 | 2 |
| 0 | 0 | 0  | 0 | 0 | 0 | 0 | 0 | 0 | 0 | 0 |
| 0 | 0 | 0  | 0 | 0 | 0 | 0 | 0 | 0 | 0 | 1 |
| 0 | 0 | 0  | 0 | 0 | 0 | 0 | 0 | 0 | 0 | 3 |
| 0 | 0 | 0  | 1 | 0 | 0 | 0 | 0 | 0 | 0 | 0 |
| 0 | 0 | 0  | 2 | 0 | 0 | 0 | 0 | 0 | 0 | 0 |
| 0 | 0 | 1  | 3 | 0 | 0 | 0 | 0 | 0 | 0 | 0 |
| 0 | 0 | 49 | 1 | 0 | 0 | 0 | 0 | 0 | 0 | 0 |
| 0 | 0 | 15 | 1 | 0 | 0 | 0 | 0 | 0 | 0 | 2 |
| 0 | 0 | 0  | 0 | 0 | 0 | 0 | 0 | 0 | 0 | 1 |
| 0 | 0 | 11 | 3 | 0 | 0 | 0 | 0 | 0 | 0 | 1 |
| 0 | 0 | 0  | 5 | 0 | 0 | 0 | 0 | 0 | 0 | 0 |
| 0 | 0 | 0  | 2 | 0 | 0 | 0 | 0 | 0 | 0 | 3 |
| 0 | 0 | 0  | 2 | 0 | 0 | 0 | 0 | 0 | 0 | 0 |
| 0 | 0 | 0  | 2 | 0 | 0 | 0 | 0 | 0 | 0 | 0 |
| 0 | 0 | 0  | 2 | 0 | 0 | 0 | 0 | 0 | 0 | 0 |
| 0 | 0 | 6  | 3 | 0 | 0 | 0 | 0 | 0 | 0 | 1 |
| 0 | 0 | 0  | 2 | 0 | 0 | 0 | 0 | 0 | 0 | 1 |
| 0 | 0 | 0  | 1 | 0 | 0 | 0 | 0 | 0 | 0 | 1 |
| 0 | 0 | 6  | 4 | 0 | 0 | 0 | 0 | 0 | 0 | 0 |
| 0 | 0 | 0  | 2 | 0 | 1 | 0 | 0 | 0 | 0 | 0 |
| 0 | 1 | 0  | 2 | 0 | 0 | 0 | 0 | 0 | 0 | 0 |
| 0 | 0 | 0  | 0 | 0 | 0 | 0 | 0 | 0 | 0 | 1 |
| 0 | 0 | 0  | 1 | 0 | 0 | 0 | 0 | 0 | 0 | 0 |

|   |   |    |   |   |   |   |   |   |   |   |
|---|---|----|---|---|---|---|---|---|---|---|
| 0 | 0 | 0  | 0 | 0 | 0 | 0 | 0 | 0 | 0 | 0 |
| 0 | 0 | 0  | 2 | 0 | 0 | 0 | 0 | 0 | 0 | 3 |
| 0 | 0 | 0  | 0 | 0 | 0 | 0 | 0 | 0 | 0 | 0 |
| 0 | 0 | 5  | 3 | 0 | 0 | 0 | 0 | 0 | 0 | 2 |
| 0 | 0 | 3  | 4 | 0 | 0 | 0 | 0 | 0 | 0 | 0 |
| 0 | 0 | 0  | 0 | 0 | 0 | 0 | 0 | 0 | 0 | 0 |
| 0 | 0 | 10 | 5 | 0 | 0 | 0 | 0 | 0 | 0 | 0 |
| 0 | 0 | 3  | 2 | 0 | 0 | 0 | 0 | 0 | 0 | 0 |
| 0 | 0 | 0  | 1 | 0 | 0 | 0 | 0 | 0 | 0 | 0 |
| 0 | 0 | 0  | 3 | 0 | 0 | 0 | 0 | 0 | 0 | 1 |
| 0 | 0 | 0  | 0 | 0 | 0 | 0 | 0 | 0 | 0 | 0 |
| 0 | 0 | 0  | 2 | 0 | 0 | 0 | 0 | 0 | 0 | 0 |
| 0 | 0 | 0  | 2 | 0 | 0 | 0 | 0 | 0 | 0 | 0 |
| 0 | 0 | 0  | 1 | 0 | 0 | 0 | 0 | 0 | 0 | 0 |
| 0 | 0 | 0  | 1 | 0 | 0 | 0 | 0 | 0 | 0 | 0 |
| 0 | 0 | 0  | 2 | 0 | 0 | 0 | 0 | 0 | 0 | 0 |
| 0 | 0 | 0  | 1 | 0 | 1 | 0 | 0 | 0 | 0 | 0 |
| 0 | 0 | 0  | 1 | 0 | 0 | 0 | 0 | 0 | 0 | 0 |
| 0 | 0 | 0  | 2 | 0 | 0 | 0 | 0 | 0 | 0 | 0 |
| 0 | 0 | 0  | 1 | 0 | 0 | 0 | 0 | 0 | 0 | 0 |
| 0 | 0 | 0  | 0 | 0 | 0 | 0 | 0 | 0 | 0 | 0 |
| 0 | 0 | 0  | 2 | 0 | 0 | 0 | 0 | 0 | 0 | 0 |
| 0 | 0 | 0  | 1 | 0 | 2 | 1 | 0 | 0 | 0 | 0 |
| 0 | 0 | 0  | 1 | 0 | 0 | 0 | 0 | 0 | 0 | 0 |
| 0 | 0 | 0  | 0 | 0 | 0 | 0 | 0 | 0 | 0 | 0 |
| 0 | 0 | 0  | 2 | 0 | 0 | 0 | 0 | 0 | 0 | 0 |
| 0 | 0 | 0  | 2 | 0 | 1 | 0 | 0 | 0 | 0 | 0 |
| 0 | 0 | 0  | 0 | 0 | 1 | 1 | 0 | 0 | 0 | 0 |
| 0 | 0 | 0  | 0 | 0 | 0 | 1 | 0 | 0 | 0 | 0 |

|   |   |   |   |   |    |    |   |   |   |   |
|---|---|---|---|---|----|----|---|---|---|---|
| 0 | 0 | 0 | 0 | 0 | 0  | 0  | 0 | 0 | 0 | 0 |
| 0 | 0 | 0 | 0 | 0 | 0  | 2  | 0 | 0 | 0 | 0 |
| 0 | 0 | 0 | 0 | 0 | 0  | 0  | 0 | 0 | 0 | 0 |
| 0 | 0 | 0 | 0 | 0 | 3  | 1  | 0 | 0 | 0 | 0 |
| 0 | 0 | 0 | 0 | 1 | 0  | 0  | 0 | 0 | 0 | 0 |
| 0 | 0 | 0 | 0 | 0 | 2  | 0  | 0 | 0 | 0 | 0 |
| 0 | 0 | 0 | 0 | 0 | 0  | 0  | 0 | 0 | 0 | 0 |
| 0 | 0 | 0 | 0 | 0 | 0  | 1  | 0 | 0 | 0 | 0 |
| 0 | 0 | 0 | 0 | 0 | 1  | 1  | 0 | 0 | 0 | 0 |
| 0 | 0 | 0 | 1 | 0 | 0  | 0  | 0 | 0 | 0 | 0 |
| 0 | 0 | 0 | 0 | 0 | 1  | 0  | 0 | 0 | 0 | 0 |
| 0 | 0 | 0 | 0 | 0 | 0  | 0  | 0 | 0 | 0 | 0 |
| 0 | 0 | 0 | 0 | 0 | 0  | 0  | 0 | 0 | 0 | 0 |
| 0 | 0 | 0 | 0 | 0 | 0  | 4  | 0 | 0 | 0 | 0 |
| 0 | 0 | 0 | 0 | 0 | 0  | 1  | 0 | 0 | 0 | 0 |
| 0 | 0 | 0 | 0 | 0 | 0  | 0  | 0 | 0 | 0 | 0 |
| 2 | 0 | 0 | 0 | 0 | 0  | 3  | 0 | 2 | 0 | 0 |
| 0 | 0 | 0 | 0 | 0 | 19 | 0  | 0 | 0 | 0 | 0 |
| 0 | 0 | 0 | 0 | 0 | 0  | 1  | 0 | 0 | 0 | 0 |
| 0 | 0 | 0 | 0 | 0 | 0  | 1  | 0 | 0 | 0 | 0 |
| 0 | 0 | 0 | 0 | 0 | 0  | 2  | 0 | 0 | 0 | 0 |
| 0 | 0 | 0 | 0 | 0 | 77 | 5  | 0 | 0 | 0 | 0 |
| 0 | 0 | 0 | 0 | 0 | 0  | 7  | 0 | 0 | 0 | 0 |
| 0 | 0 | 0 | 0 | 0 | 0  | 1  | 0 | 0 | 0 | 0 |
| 0 | 0 | 0 | 0 | 0 | 0  | 3  | 0 | 0 | 0 | 0 |
| 0 | 0 | 0 | 0 | 0 | 1  | 5  | 1 | 0 | 0 | 0 |
| 0 | 0 | 0 | 0 | 0 | 1  | 2  | 0 | 0 | 0 | 0 |
| 0 | 0 | 0 | 0 | 0 | 0  | 0  | 0 | 0 | 0 | 0 |
| 0 | 0 | 0 | 0 | 0 | 10 | 12 | 0 | 1 | 0 | 0 |

|   |   |   |   |   |    |    |   |   |   |   |
|---|---|---|---|---|----|----|---|---|---|---|
| 0 | 0 | 0 | 0 | 0 | 0  | 4  | 0 | 0 | 0 | 0 |
| 0 | 0 | 0 | 0 | 0 | 56 | 10 | 0 | 0 | 0 | 0 |
| 0 | 0 | 0 | 0 | 0 | 0  | 0  | 0 | 0 | 0 | 0 |
| 0 | 0 | 0 | 0 | 0 | 96 | 11 | 0 | 0 | 0 | 0 |
| 0 | 0 | 0 | 0 | 0 | 77 | 5  | 0 | 1 | 0 | 0 |
| 0 | 0 | 0 | 0 | 0 | 3  | 5  | 0 | 0 | 0 | 0 |
| 0 | 0 | 0 | 0 | 0 | 0  | 9  | 0 | 0 | 0 | 0 |
| 0 | 0 | 0 | 0 | 0 | 0  | 0  | 0 | 0 | 0 | 0 |
| 0 | 0 | 0 | 0 | 0 | 0  | 4  | 0 | 0 | 0 | 0 |
| 0 | 0 | 0 | 0 | 0 | 0  | 7  | 2 | 0 | 0 | 0 |
| 0 | 0 | 0 | 0 | 0 | 0  | 7  | 0 | 0 | 0 | 0 |
| 0 | 0 | 0 | 0 | 0 | 1  | 0  | 0 | 0 | 1 | 0 |
| 0 | 0 | 0 | 0 | 0 | 1  | 4  | 0 | 0 | 0 | 0 |
| 0 | 1 | 0 | 0 | 0 | 1  | 4  | 0 | 0 | 0 | 0 |
| 0 | 0 | 0 | 0 | 1 | 2  | 3  | 0 | 1 | 0 | 0 |
| 0 | 0 | 0 | 0 | 0 | 0  | 4  | 0 | 0 | 0 | 0 |
| 0 | 0 | 0 | 0 | 0 | 0  | 3  | 0 | 0 | 0 | 0 |
| 0 | 0 | 0 | 1 | 1 | 0  | 4  | 0 | 0 | 0 | 0 |
| 1 | 0 | 0 | 0 | 0 | 0  | 2  | 0 | 1 | 0 | 0 |
| 1 | 0 | 0 | 0 | 0 | 0  | 3  | 0 | 0 | 0 | 0 |
| 0 | 0 | 0 | 0 | 0 | 0  | 2  | 0 | 0 | 0 | 0 |
| 0 | 0 | 0 | 0 | 0 | 0  | 4  | 0 | 0 | 0 | 0 |
| 0 | 0 | 0 | 0 | 0 | 0  | 1  | 0 | 0 | 0 | 0 |
| 1 | 0 | 0 | 0 | 0 | 2  | 12 | 0 | 0 | 0 | 0 |
| 0 | 0 | 0 | 0 | 0 | 8  | 4  | 0 | 0 | 0 | 0 |
| 0 | 0 | 0 | 0 | 0 | 0  | 4  | 0 | 0 | 0 | 0 |
| 0 | 0 | 0 | 0 | 0 | 0  | 3  | 0 | 0 | 0 | 0 |
| 0 | 0 | 0 | 0 | 0 | 0  | 0  | 0 | 0 | 0 | 1 |
| 0 | 0 | 0 | 0 | 0 | 0  | 7  | 0 | 0 | 0 | 0 |

|   |   |   |   |   |   |   |   |   |   |   |
|---|---|---|---|---|---|---|---|---|---|---|
| 0 | 0 | 0 | 0 | 0 | 0 | 2 | 0 | 0 | 0 | 0 |
| 0 | 0 | 0 | 0 | 0 | 0 | 1 | 0 | 0 | 0 | 0 |
| 0 | 0 | 0 | 0 | 0 | 0 | 0 | 0 | 0 | 0 | 0 |
| 1 | 0 | 0 | 0 | 0 | 0 | 1 | 0 | 0 | 0 | 0 |
| 0 | 0 | 0 | 0 | 0 | 0 | 0 | 0 | 0 | 0 | 0 |
| 0 | 0 | 0 | 0 | 0 | 0 | 0 | 0 | 0 | 0 | 0 |
| 0 | 0 | 0 | 0 | 0 | 0 | 2 | 0 | 0 | 0 | 0 |
| 0 | 0 | 0 | 0 | 0 | 0 | 5 | 0 | 0 | 0 | 0 |
| 0 | 0 | 0 | 1 | 0 | 0 | 7 | 0 | 0 | 0 | 0 |
| 0 | 0 | 0 | 1 | 0 | 0 | 2 | 0 | 0 | 0 | 0 |
| 0 | 0 | 0 | 0 | 0 | 0 | 0 | 0 | 0 | 0 | 0 |
| 0 | 0 | 0 | 1 | 0 | 0 | 3 | 0 | 0 | 0 | 0 |
| 0 | 0 | 0 | 1 | 0 | 0 | 2 | 0 | 0 | 0 | 0 |
| 0 | 0 | 0 | 0 | 0 | 1 | 0 | 0 | 0 | 0 | 0 |
| 0 | 0 | 0 | 1 | 0 | 0 | 1 | 0 | 0 | 0 | 0 |
| 0 | 0 | 0 | 0 | 0 | 0 | 4 | 0 | 0 | 0 | 0 |
| 0 | 0 | 0 | 0 | 0 | 0 | 0 | 0 | 0 | 0 | 0 |
| 0 | 0 | 0 | 0 | 0 | 1 | 0 | 0 | 0 | 0 | 0 |
| 0 | 0 | 0 | 1 | 0 | 0 | 0 | 0 | 0 | 0 | 0 |
| 0 | 0 | 0 | 2 | 0 | 0 | 0 | 0 | 0 | 0 | 0 |
| 0 | 0 | 0 | 1 | 0 | 0 | 0 | 0 | 0 | 0 | 0 |
| 0 | 0 | 0 | 1 | 0 | 0 | 2 | 0 | 0 | 0 | 0 |
| 0 | 0 | 0 | 0 | 0 | 0 | 0 | 0 | 0 | 0 | 0 |
| 0 | 0 | 0 | 1 | 0 | 0 | 0 | 0 | 0 | 0 | 0 |
| 0 | 0 | 0 | 0 | 0 | 0 | 1 | 0 | 0 | 0 | 0 |
| 0 | 0 | 0 | 0 | 0 | 0 | 1 | 0 | 0 | 0 | 1 |
| 0 | 0 | 0 | 0 | 0 | 0 | 0 | 0 | 0 | 0 | 0 |
| 0 | 0 | 0 | 0 | 0 | 0 | 0 | 0 | 0 | 0 | 0 |
| 0 | 0 | 6 | 1 | 0 | 0 | 0 | 0 | 0 | 0 | 0 |



|   |   |    |    |   |   |   |   |   |   |   |
|---|---|----|----|---|---|---|---|---|---|---|
| 0 | 0 | 0  | 0  | 0 | 0 | 1 | 0 | 0 | 0 | 0 |
| 0 | 0 | 0  | 1  | 0 | 0 | 1 | 0 | 0 | 0 | 0 |
| 0 | 0 | 0  | 2  | 0 | 0 | 1 | 0 | 0 | 0 | 0 |
| 0 | 0 | 16 | 4  | 0 | 0 | 0 | 0 | 0 | 0 | 0 |
| 0 | 0 | 0  | 2  | 0 | 0 | 0 | 0 | 0 | 0 | 0 |
| 0 | 0 | 0  | 1  | 0 | 1 | 2 | 0 | 0 | 0 | 0 |
| 0 | 0 | 0  | 3  | 0 | 0 | 1 | 0 | 0 | 0 | 0 |
| 0 | 1 | 0  | 0  | 0 | 0 | 0 | 0 | 0 | 0 | 0 |
| 0 | 0 | 0  | 0  | 0 | 0 | 0 | 0 | 0 | 0 | 0 |
| 0 | 0 | 0  | 1  | 0 | 0 | 0 | 0 | 0 | 0 | 0 |
| 0 | 0 | 0  | 1  | 0 | 0 | 0 | 0 | 0 | 0 | 0 |
| 0 | 0 | 0  | 5  | 0 | 0 | 0 | 0 | 0 | 0 | 0 |
| 0 | 0 | 15 | 7  | 0 | 0 | 0 | 0 | 0 | 0 | 0 |
| 0 | 0 | 11 | 2  | 0 | 0 | 0 | 0 | 0 | 0 | 0 |
| 0 | 0 | 0  | 2  | 0 | 0 | 0 | 0 | 0 | 0 | 0 |
| 0 | 0 | 28 | 6  | 0 | 0 | 0 | 0 | 1 | 0 | 0 |
| 0 | 0 | 9  | 0  | 0 | 0 | 0 | 0 | 0 | 0 | 0 |
| 0 | 0 | 0  | 3  | 0 | 0 | 0 | 0 | 0 | 0 | 0 |
| 0 | 0 | 0  | 2  | 0 | 0 | 0 | 0 | 0 | 0 | 0 |
| 0 | 0 | 0  | 3  | 0 | 0 | 0 | 0 | 0 | 0 | 0 |
| 0 | 0 | 4  | 10 | 0 | 0 | 0 | 0 | 0 | 0 | 0 |
| 0 | 0 | 0  | 1  | 0 | 0 | 0 | 0 | 0 | 0 | 0 |
| 0 | 0 | 0  | 2  | 0 | 0 | 0 | 0 | 0 | 0 | 0 |
| 0 | 0 | 0  | 1  | 0 | 0 | 0 | 0 | 0 | 0 | 0 |
| 0 | 0 | 16 | 4  | 0 | 0 | 0 | 0 | 1 | 0 | 0 |
| 0 | 0 | 0  | 1  | 0 | 0 | 0 | 0 | 0 | 0 | 0 |
| 0 | 0 | 0  | 2  | 0 | 0 | 0 | 0 | 0 | 0 | 0 |
| 0 | 0 | 0  | 0  | 0 | 0 | 0 | 0 | 0 | 0 | 0 |
| 0 | 0 | 0  | 4  | 0 | 0 | 0 | 0 | 0 | 0 | 0 |

|   |   |   |   |   |   |   |   |   |   |   |
|---|---|---|---|---|---|---|---|---|---|---|
| 0 | 0 | 0 | 5 | 0 | 0 | 0 | 0 | 0 | 0 | 0 |
| 0 | 0 | 0 | 2 | 0 | 0 | 0 | 0 | 0 | 0 | 0 |
| 0 | 0 | 0 | 2 | 0 | 0 | 0 | 0 | 0 | 0 | 0 |
| 0 | 0 | 0 | 0 | 0 | 0 | 0 | 0 | 0 | 0 | 0 |
| 0 | 0 | 0 | 0 | 0 | 0 | 0 | 0 | 0 | 0 | 0 |
| 0 | 0 | 0 | 1 | 0 | 0 | 0 | 0 | 0 | 0 | 0 |
| 0 | 0 | 0 | 2 | 0 | 0 | 0 | 0 | 0 | 0 | 0 |
| 0 | 0 | 0 | 0 | 0 | 0 | 0 | 0 | 0 | 0 | 0 |
| 0 | 0 | 0 | 0 | 0 | 0 | 0 | 0 | 0 | 0 | 0 |
| 0 | 0 | 0 | 1 | 0 | 0 | 0 | 0 | 0 | 0 | 2 |
| 0 | 0 | 0 | 0 | 0 | 0 | 0 | 0 | 0 | 0 | 0 |
| 0 | 0 | 0 | 0 | 0 | 0 | 0 | 0 | 0 | 0 | 0 |
| 0 | 0 | 0 | 0 | 0 | 0 | 0 | 0 | 0 | 0 | 0 |
| 0 | 0 | 0 | 2 | 0 | 0 | 0 | 0 | 1 | 0 | 0 |
| 0 | 0 | 2 | 1 | 0 | 0 | 0 | 0 | 0 | 0 | 2 |
| 0 | 0 | 0 | 0 | 0 | 0 | 0 | 0 | 0 | 0 | 2 |
| 0 | 0 | 0 | 0 | 0 | 0 | 1 | 0 | 0 | 0 | 6 |
| 0 | 0 | 0 | 0 | 0 | 0 | 0 | 0 | 0 | 0 | 3 |
| 0 | 0 | 0 | 1 | 0 | 0 | 0 | 0 | 0 | 0 | 3 |
| 0 | 0 | 0 | 0 | 0 | 0 | 0 | 0 | 0 | 0 | 3 |
| 0 | 0 | 0 | 0 | 0 | 0 | 0 | 0 | 0 | 0 | 8 |
| 0 | 0 | 0 | 1 | 0 | 0 | 0 | 0 | 0 | 0 | 3 |

|        |        |        |        |        |        |        |        |        |        |        |   |
|--------|--------|--------|--------|--------|--------|--------|--------|--------|--------|--------|---|
| asychi | auscra | ausmod | ausstu | barlep | bocsyr | bumcir | callia | capite | caprel | cerato |   |
| 0      | 0      | 0      | 0      | 0      | 0      | 0      | 0      | 0      | 0      | 0      | 0 |
| 0      | 0      | 0      | 1      | 0      | 0      | 1      | 0      | 0      | 0      | 0      | 0 |
| 0      | 0      | 0      | 0      | 0      | 0      | 0      | 0      | 0      | 0      | 0      | 0 |
| 0      | 0      | 0      | 1      | 0      | 0      | 0      | 0      | 0      | 0      | 0      | 0 |

|   |   |   |    |   |   |   |   |   |   |   |
|---|---|---|----|---|---|---|---|---|---|---|
| 0 | 0 | 0 | 0  | 0 | 0 | 0 | 0 | 1 | 0 | 0 |
| 0 | 0 | 0 | 2  | 0 | 1 | 0 | 0 | 0 | 0 | 0 |
| 0 | 0 | 0 | 0  | 0 | 0 | 0 | 0 | 0 | 0 | 0 |
| 0 | 0 | 0 | 0  | 0 | 0 | 0 | 0 | 0 | 0 | 0 |
| 0 | 0 | 0 | 1  | 0 | 0 | 0 | 0 | 0 | 0 | 0 |
| 0 | 0 | 0 | 0  | 0 | 0 | 0 | 0 | 0 | 0 | 0 |
| 0 | 0 | 0 | 0  | 0 | 0 | 0 | 0 | 0 | 0 | 0 |
| 0 | 0 | 0 | 0  | 0 | 1 | 0 | 0 | 0 | 0 | 0 |
| 0 | 0 | 0 | 0  | 0 | 1 | 0 | 0 | 0 | 0 | 0 |
| 0 | 0 | 0 | 0  | 0 | 1 | 2 | 0 | 0 | 1 | 0 |
| 0 | 0 | 0 | 0  | 0 | 0 | 0 | 0 | 0 | 0 | 0 |
| 1 | 0 | 0 | 0  | 0 | 0 | 0 | 0 | 0 | 0 | 0 |
| 0 | 0 | 0 | 0  | 0 | 1 | 0 | 0 | 0 | 0 | 0 |
| 0 | 0 | 0 | 0  | 0 | 1 | 0 | 0 | 0 | 0 | 0 |
| 0 | 0 | 0 | 0  | 0 | 0 | 0 | 0 | 0 | 0 | 0 |
| 1 | 0 | 0 | 0  | 0 | 6 | 0 | 0 | 0 | 0 | 0 |
| 0 | 0 | 0 | 0  | 0 | 0 | 0 | 0 | 0 | 0 | 0 |
| 0 | 0 | 0 | 2  | 0 | 0 | 0 | 0 | 0 | 0 | 0 |
| 0 | 0 | 0 | 2  | 0 | 0 | 0 | 0 | 0 | 0 | 0 |
| 0 | 0 | 0 | 2  | 0 | 0 | 1 | 0 | 0 | 0 | 0 |
| 0 | 0 | 0 | 1  | 0 | 1 | 1 | 0 | 0 | 0 | 0 |
| 0 | 0 | 1 | 1  | 0 | 0 | 0 | 0 | 0 | 0 | 0 |
| 0 | 0 | 0 | 0  | 0 | 1 | 0 | 0 | 0 | 0 | 0 |
| 0 | 0 | 0 | 2  | 0 | 0 | 0 | 0 | 0 | 0 | 0 |
| 0 | 0 | 0 | 1  | 0 | 0 | 0 | 0 | 0 | 0 | 0 |
| 0 | 0 | 0 | 1  | 0 | 0 | 0 | 0 | 0 | 0 | 0 |
| 0 | 1 | 0 | 3  | 0 | 0 | 0 | 0 | 0 | 0 | 0 |
| 0 | 0 | 0 | 26 | 0 | 0 | 0 | 0 | 0 | 0 | 0 |
| 0 | 0 | 0 | 2  | 0 | 0 | 0 | 0 | 0 | 0 | 0 |

|   |   |   |    |   |   |   |   |   |   |   |
|---|---|---|----|---|---|---|---|---|---|---|
| 0 | 0 | 0 | 3  | 0 | 0 | 0 | 0 | 0 | 0 | 0 |
| 0 | 0 | 0 | 3  | 0 | 0 | 0 | 0 | 0 | 0 | 0 |
| 0 | 0 | 0 | 8  | 0 | 0 | 0 | 0 | 0 | 0 | 0 |
| 0 | 0 | 0 | 5  | 0 | 0 | 0 | 0 | 0 | 0 | 0 |
| 0 | 0 | 0 | 3  | 0 | 0 | 0 | 0 | 0 | 0 | 0 |
| 0 | 0 | 0 | 10 | 0 | 0 | 0 | 0 | 0 | 0 | 0 |
| 0 | 0 | 0 | 24 | 0 | 0 | 0 | 0 | 0 | 0 | 0 |
| 0 | 0 | 0 | 12 | 0 | 1 | 0 | 0 | 0 | 0 | 0 |
| 0 | 0 | 0 | 35 | 0 | 0 | 0 | 0 | 0 | 0 | 0 |
| 0 | 0 | 0 | 19 | 0 | 1 | 0 | 0 | 0 | 0 | 0 |
| 0 | 0 | 0 | 15 | 0 | 0 | 0 | 0 | 0 | 0 | 0 |
| 0 | 0 | 1 | 33 | 0 | 1 | 0 | 0 | 0 | 0 | 0 |
| 0 | 0 | 1 | 12 | 0 | 0 | 0 | 0 | 0 | 0 | 0 |
| 0 | 0 | 0 | 33 | 0 | 0 | 0 | 0 | 0 | 0 | 1 |
| 0 | 0 | 0 | 25 | 0 | 0 | 0 | 0 | 0 | 0 | 0 |
| 0 | 0 | 1 | 16 | 0 | 1 | 0 | 0 | 0 | 0 | 0 |
| 0 | 0 | 0 | 25 | 0 | 1 | 0 | 0 | 1 | 0 | 0 |
| 0 | 0 | 0 | 40 | 0 | 0 | 0 | 0 | 0 | 0 | 0 |
| 0 | 1 | 0 | 18 | 0 | 0 | 0 | 0 | 0 | 0 | 0 |
| 0 | 0 | 0 | 37 | 0 | 0 | 0 | 0 | 0 | 0 | 0 |
| 0 | 0 | 0 | 28 | 0 | 0 | 0 | 0 | 0 | 0 | 0 |
| 0 | 0 | 0 | 45 | 0 | 0 | 0 | 0 | 0 | 0 | 0 |
| 0 | 0 | 0 | 38 | 0 | 0 | 0 | 0 | 0 | 0 | 0 |
| 0 | 0 | 0 | 37 | 0 | 0 | 0 | 0 | 0 | 0 | 0 |
| 0 | 0 | 0 | 9  | 0 | 0 | 0 | 0 | 0 | 0 | 0 |
| 0 | 0 | 0 | 29 | 0 | 1 | 0 | 0 | 0 | 0 | 0 |
| 0 | 0 | 0 | 8  | 0 | 0 | 0 | 0 | 0 | 0 | 0 |
| 0 | 0 | 0 | 10 | 0 | 0 | 0 | 0 | 0 | 0 | 0 |
| 0 | 0 | 0 | 28 | 0 | 2 | 0 | 0 | 0 | 0 | 0 |

|   |   |   |    |   |   |   |   |   |   |   |
|---|---|---|----|---|---|---|---|---|---|---|
| 0 | 0 | 0 | 18 | 0 | 0 | 0 | 0 | 0 | 0 | 0 |
| 0 | 0 | 0 | 18 | 0 | 0 | 0 | 0 | 0 | 0 | 0 |
| 0 | 0 | 0 | 1  | 0 | 0 | 0 | 0 | 0 | 0 | 0 |
| 0 | 0 | 0 | 4  | 0 | 0 | 0 | 0 | 0 | 0 | 0 |
| 0 | 0 | 0 | 3  | 0 | 0 | 0 | 0 | 0 | 0 | 0 |
| 0 | 0 | 0 | 3  | 0 | 0 | 0 | 0 | 0 | 0 | 0 |
| 0 | 0 | 0 | 21 | 0 | 0 | 0 | 0 | 0 | 0 | 0 |
| 0 | 0 | 0 | 19 | 0 | 0 | 0 | 0 | 0 | 0 | 0 |
| 0 | 0 | 0 | 9  | 0 | 0 | 0 | 0 | 0 | 0 | 0 |
| 0 | 0 | 0 | 7  | 0 | 0 | 2 | 0 | 0 | 0 | 0 |
| 0 | 0 | 0 | 14 | 0 | 1 | 0 | 0 | 0 | 0 | 0 |
| 0 | 0 | 0 | 14 | 0 | 0 | 0 | 0 | 0 | 0 | 0 |
| 0 | 0 | 0 | 5  | 0 | 0 | 0 | 0 | 0 | 0 | 0 |
| 0 | 0 | 0 | 10 | 0 | 0 | 0 | 0 | 0 | 0 | 0 |
| 0 | 1 | 0 | 11 | 0 | 0 | 0 | 0 | 0 | 0 | 0 |
| 0 | 0 | 0 | 9  | 0 | 0 | 0 | 0 | 0 | 0 | 0 |
| 0 | 0 | 0 | 9  | 0 | 0 | 0 | 0 | 0 | 0 | 0 |
| 0 | 0 | 0 | 2  | 0 | 0 | 0 | 0 | 0 | 0 | 0 |
| 0 | 0 | 0 | 6  | 0 | 0 | 0 | 0 | 0 | 0 | 0 |
| 0 | 0 | 0 | 2  | 0 | 2 | 0 | 0 | 0 | 0 | 0 |
| 0 | 1 | 0 | 6  | 0 | 0 | 0 | 0 | 0 | 0 | 0 |
| 0 | 0 | 0 | 3  | 0 | 0 | 0 | 0 | 0 | 0 | 0 |
| 0 | 0 | 0 | 9  | 0 | 0 | 0 | 0 | 0 | 0 | 0 |
| 0 | 0 | 0 | 2  | 0 | 1 | 0 | 0 | 0 | 0 | 0 |
| 0 | 0 | 0 | 1  | 0 | 5 | 0 | 0 | 0 | 0 | 0 |
| 0 | 0 | 0 | 2  | 0 | 0 | 0 | 0 | 0 | 0 | 0 |
| 0 | 0 | 0 | 0  | 0 | 1 | 0 | 0 | 0 | 0 | 0 |
| 0 | 0 | 0 | 0  | 0 | 0 | 0 | 0 | 0 | 0 | 0 |
| 0 | 0 | 0 | 0  | 0 | 1 | 0 | 0 | 0 | 0 | 0 |

|   |   |   |   |   |   |   |   |   |   |   |
|---|---|---|---|---|---|---|---|---|---|---|
| 0 | 0 | 0 | 0 | 0 | 0 | 0 | 0 | 0 | 0 | 0 |
| 0 | 0 | 0 | 0 | 0 | 6 | 0 | 0 | 0 | 0 | 0 |
| 0 | 0 | 0 | 1 | 0 | 1 | 0 | 0 | 0 | 0 | 0 |
| 0 | 0 | 0 | 0 | 0 | 1 | 0 | 0 | 0 | 0 | 0 |
| 0 | 0 | 0 | 1 | 0 | 0 | 0 | 0 | 0 | 0 | 0 |
| 0 | 0 | 0 | 0 | 0 | 0 | 0 | 0 | 0 | 0 | 0 |
| 0 | 0 | 0 | 0 | 0 | 0 | 0 | 0 | 0 | 0 | 0 |
| 0 | 0 | 0 | 0 | 0 | 1 | 0 | 0 | 0 | 0 | 0 |
| 1 | 0 | 0 | 0 | 0 | 0 | 0 | 0 | 0 | 0 | 0 |
| 0 | 0 | 0 | 0 | 0 | 2 | 1 | 0 | 0 | 0 | 0 |
| 0 | 0 | 0 | 0 | 0 | 0 | 0 | 0 | 0 | 0 | 0 |
| 0 | 0 | 0 | 0 | 0 | 4 | 0 | 0 | 0 | 0 | 0 |
| 2 | 0 | 0 | 0 | 0 | 3 | 1 | 0 | 0 | 0 | 0 |
| 0 | 0 | 0 | 0 | 0 | 0 | 1 | 0 | 1 | 0 | 0 |
| 1 | 0 | 0 | 0 | 0 | 0 | 0 | 0 | 0 | 0 | 0 |
| 0 | 0 | 0 | 1 | 0 | 1 | 1 | 0 | 0 | 0 | 0 |
| 0 | 0 | 0 | 0 | 0 | 1 | 1 | 0 | 0 | 0 | 0 |
| 0 | 0 | 0 | 0 | 0 | 0 | 1 | 0 | 0 | 0 | 0 |
| 0 | 0 | 0 | 0 | 0 | 1 | 0 | 0 | 0 | 0 | 0 |
| 0 | 0 | 0 | 1 | 0 | 3 | 1 | 0 | 0 | 0 | 1 |
| 0 | 0 | 0 | 0 | 0 | 0 | 0 | 0 | 0 | 0 | 0 |
| 0 | 0 | 0 | 0 | 0 | 2 | 0 | 0 | 0 | 0 | 0 |
| 0 | 0 | 0 | 1 | 0 | 1 | 4 | 0 | 0 | 0 | 1 |
| 1 | 0 | 0 | 0 | 0 | 0 | 0 | 0 | 1 | 0 | 0 |
| 0 | 0 | 0 | 0 | 0 | 1 | 0 | 0 | 0 | 0 | 0 |
| 0 | 0 | 0 | 0 | 0 | 3 | 0 | 0 | 0 | 0 | 0 |
| 0 | 0 | 0 | 0 | 0 | 3 | 0 | 0 | 0 | 0 | 0 |
| 0 | 0 | 0 | 0 | 0 | 1 | 1 | 0 | 0 | 0 | 0 |
| 0 | 0 | 0 | 0 | 0 | 2 | 0 | 0 | 0 | 0 | 0 |

|   |   |   |    |   |   |   |   |   |   |   |
|---|---|---|----|---|---|---|---|---|---|---|
| 0 | 0 | 0 | 1  | 0 | 4 | 0 | 0 | 0 | 0 | 0 |
| 0 | 0 | 0 | 0  | 0 | 2 | 0 | 0 | 1 | 0 | 0 |
| 0 | 0 | 0 | 0  | 0 | 2 | 1 | 0 | 0 | 0 | 0 |
| 0 | 0 | 0 | 0  | 0 | 3 | 0 | 0 | 0 | 0 | 0 |
| 0 | 0 | 0 | 1  | 0 | 3 | 3 | 0 | 0 | 0 | 0 |
| 0 | 0 | 0 | 1  | 0 | 0 | 0 | 0 | 0 | 0 | 0 |
| 0 | 0 | 0 | 0  | 0 | 1 | 0 | 0 | 0 | 0 | 0 |
| 0 | 0 | 0 | 1  | 0 | 0 | 0 | 0 | 0 | 0 | 0 |
| 0 | 0 | 0 | 1  | 0 | 0 | 0 | 0 | 0 | 0 | 0 |
| 0 | 0 | 0 | 1  | 0 | 1 | 1 | 0 | 0 | 0 | 0 |
| 0 | 0 | 0 | 0  | 0 | 2 | 0 | 0 | 0 | 0 | 0 |
| 0 | 0 | 0 | 7  | 0 | 1 | 0 | 0 | 0 | 0 | 0 |
| 0 | 0 | 0 | 1  | 0 | 3 | 0 | 0 | 0 | 0 | 0 |
| 0 | 0 | 0 | 0  | 0 | 7 | 0 | 0 | 0 | 0 | 0 |
| 0 | 0 | 0 | 0  | 0 | 0 | 0 | 0 | 0 | 0 | 0 |
| 0 | 0 | 0 | 1  | 0 | 0 | 1 | 0 | 0 | 0 | 0 |
| 0 | 0 | 0 | 2  | 0 | 1 | 0 | 0 | 0 | 0 | 0 |
| 0 | 0 | 0 | 1  | 0 | 9 | 0 | 0 | 0 | 0 | 0 |
| 0 | 0 | 0 | 1  | 0 | 0 | 0 | 0 | 0 | 0 | 0 |
| 0 | 0 | 0 | 3  | 0 | 0 | 0 | 0 | 0 | 0 | 0 |
| 0 | 0 | 0 | 5  | 0 | 2 | 0 | 0 | 0 | 0 | 0 |
| 0 | 0 | 0 | 9  | 0 | 0 | 0 | 0 | 0 | 0 | 0 |
| 0 | 0 | 0 | 8  | 0 | 3 | 0 | 0 | 0 | 0 | 0 |
| 0 | 0 | 0 | 9  | 0 | 2 | 1 | 0 | 0 | 0 | 0 |
| 0 | 0 | 0 | 5  | 0 | 2 | 1 | 0 | 0 | 0 | 0 |
| 0 | 0 | 0 | 12 | 0 | 0 | 0 | 0 | 0 | 0 | 0 |
| 0 | 0 | 0 | 8  | 0 | 0 | 0 | 0 | 0 | 0 | 0 |
| 0 | 0 | 0 | 7  | 0 | 0 | 0 | 0 | 0 | 0 | 0 |
| 0 | 0 | 0 | 31 | 0 | 0 | 1 | 0 | 0 | 0 | 0 |

|   |   |   |    |   |   |   |   |   |   |   |
|---|---|---|----|---|---|---|---|---|---|---|
| 0 | 0 | 0 | 3  | 0 | 0 | 0 | 0 | 0 | 0 | 0 |
| 0 | 0 | 0 | 13 | 0 | 0 | 0 | 0 | 0 | 0 | 0 |
| 0 | 0 | 0 | 15 | 0 | 0 | 0 | 0 | 0 | 0 | 0 |
| 0 | 0 | 0 | 22 | 0 | 1 | 0 | 0 | 0 | 0 | 0 |
| 0 | 0 | 0 | 34 | 0 | 0 | 0 | 0 | 0 | 0 | 0 |
| 0 | 0 | 0 | 7  | 0 | 0 | 0 | 0 | 0 | 0 | 0 |
| 0 | 0 | 0 | 15 | 0 | 1 | 0 | 0 | 0 | 0 | 0 |
| 0 | 0 | 0 | 1  | 0 | 0 | 0 | 0 | 0 | 0 | 0 |
| 0 | 0 | 0 | 4  | 0 | 0 | 0 | 0 | 0 | 0 | 0 |
| 0 | 0 | 1 | 23 | 0 | 0 | 0 | 0 | 0 | 0 | 0 |
| 0 | 0 | 0 | 6  | 0 | 0 | 0 | 0 | 0 | 0 | 0 |
| 0 | 0 | 0 | 16 | 0 | 0 | 0 | 0 | 0 | 0 | 0 |
| 0 | 0 | 0 | 33 | 0 | 0 | 0 | 0 | 0 | 0 | 0 |
| 0 | 0 | 0 | 6  | 0 | 0 | 0 | 0 | 0 | 0 | 0 |
| 0 | 0 | 0 | 22 | 0 | 0 | 0 | 0 | 0 | 0 | 0 |
| 0 | 0 | 0 | 12 | 0 | 0 | 0 | 0 | 0 | 0 | 0 |
| 0 | 0 | 1 | 37 | 0 | 0 | 0 | 0 | 0 | 0 | 0 |
| 0 | 0 | 0 | 20 | 0 | 0 | 0 | 0 | 0 | 0 | 0 |
| 0 | 0 | 0 | 25 | 0 | 0 | 0 | 0 | 0 | 0 | 0 |
| 0 | 0 | 0 | 29 | 0 | 0 | 0 | 0 | 0 | 0 | 0 |
| 0 | 0 | 0 | 25 | 0 | 1 | 0 | 0 | 0 | 0 | 0 |
| 0 | 0 | 0 | 22 | 0 | 1 | 0 | 0 | 0 | 0 | 0 |
| 0 | 0 | 0 | 7  | 0 | 0 | 0 | 0 | 1 | 0 | 0 |
| 0 | 0 | 0 | 42 | 0 | 3 | 0 | 0 | 0 | 0 | 0 |
| 0 | 0 | 0 | 12 | 0 | 0 | 0 | 0 | 0 | 0 | 0 |
| 0 | 0 | 0 | 7  | 0 | 1 | 0 | 0 | 0 | 0 | 0 |
| 0 | 0 | 0 | 17 | 0 | 1 | 0 | 0 | 0 | 0 | 0 |
| 0 | 0 | 0 | 25 | 0 | 0 | 0 | 0 | 0 | 0 | 0 |
| 0 | 0 | 0 | 21 | 0 | 0 | 0 | 0 | 0 | 0 | 0 |



|   |   |   |    |   |   |   |   |   |   |   |
|---|---|---|----|---|---|---|---|---|---|---|
| 0 | 0 | 0 | 0  | 0 | 0 | 0 | 0 | 0 | 0 | 0 |
| 0 | 0 | 0 | 0  | 0 | 0 | 0 | 0 | 0 | 0 | 0 |
| 0 | 0 | 0 | 0  | 0 | 1 | 0 | 0 | 0 | 0 | 0 |
| 0 | 0 | 0 | 2  | 0 | 1 | 0 | 0 | 0 | 0 | 0 |
| 0 | 0 | 0 | 4  | 0 | 0 | 0 | 0 | 0 | 0 | 0 |
| 0 | 0 | 0 | 7  | 0 | 1 | 0 | 0 | 0 | 0 | 0 |
| 0 | 0 | 0 | 12 | 0 | 0 | 0 | 0 | 0 | 0 | 0 |
| 0 | 0 | 0 | 10 | 0 | 0 | 0 | 0 | 0 | 0 | 0 |
| 0 | 0 | 1 | 7  | 0 | 0 | 1 | 0 | 0 | 0 | 0 |
| 0 | 0 | 0 | 4  | 0 | 0 | 0 | 0 | 0 | 0 | 0 |
| 0 | 0 | 0 | 4  | 0 | 0 | 0 | 0 | 0 | 0 | 0 |
| 0 | 0 | 0 | 0  | 0 | 0 | 0 | 0 | 0 | 0 | 0 |
| 0 | 1 | 0 | 2  | 0 | 0 | 0 | 0 | 0 | 0 | 0 |
| 0 | 0 | 0 | 4  | 0 | 2 | 0 | 0 | 0 | 0 | 0 |
| 0 | 0 | 0 | 3  | 0 | 0 | 0 | 0 | 0 | 0 | 0 |
| 0 | 0 | 0 | 0  | 0 | 0 | 0 | 0 | 0 | 0 | 0 |
| 0 | 0 | 0 | 0  | 0 | 1 | 1 | 0 | 0 | 0 | 0 |
| 0 | 0 | 0 | 1  | 0 | 1 | 0 | 0 | 0 | 0 | 0 |
| 0 | 0 | 0 | 0  | 0 | 0 | 0 | 0 | 0 | 0 | 0 |
| 0 | 0 | 0 | 1  | 0 | 0 | 0 | 0 | 0 | 0 | 0 |
| 0 | 0 | 0 | 2  | 0 | 0 | 0 | 0 | 0 | 0 | 0 |
| 0 | 0 | 0 | 1  | 0 | 0 | 0 | 0 | 0 | 0 | 0 |
| 0 | 0 | 0 | 0  | 0 | 0 | 0 | 0 | 0 | 0 | 0 |
| 0 | 0 | 0 | 1  | 0 | 0 | 0 | 0 | 0 | 0 | 0 |
| 0 | 0 | 0 | 2  | 0 | 0 | 0 | 0 | 0 | 0 | 0 |
| 0 | 0 | 0 | 3  | 0 | 2 | 0 | 0 | 0 | 0 | 1 |
| 0 | 0 | 0 | 1  | 0 | 0 | 0 | 0 | 0 | 0 | 0 |
| 0 | 0 | 0 | 2  | 0 | 0 | 0 | 0 | 0 | 0 | 0 |
| 0 | 0 | 0 | 3  | 0 | 0 | 0 | 0 | 0 | 0 | 0 |

|   |   |   |    |   |   |   |   |   |   |   |
|---|---|---|----|---|---|---|---|---|---|---|
| 0 | 0 | 0 | 1  | 0 | 0 | 0 | 0 | 0 | 0 | 0 |
| 0 | 0 | 0 | 7  | 0 | 0 | 0 | 0 | 0 | 0 | 0 |
| 0 | 0 | 0 | 6  | 0 | 1 | 0 | 0 | 0 | 0 | 0 |
| 0 | 0 | 0 | 8  | 0 | 0 | 0 | 0 | 0 | 0 | 0 |
| 0 | 0 | 1 | 16 | 0 | 0 | 0 | 0 | 0 | 0 | 0 |
| 0 | 0 | 0 | 7  | 0 | 0 | 0 | 0 | 0 | 0 | 0 |
| 0 | 0 | 0 | 5  | 0 | 0 | 0 | 0 | 0 | 0 | 0 |
| 0 | 0 | 0 | 3  | 0 | 0 | 0 | 0 | 0 | 0 | 0 |
| 0 | 0 | 0 | 4  | 0 | 0 | 0 | 0 | 1 | 0 | 0 |
| 0 | 0 | 0 | 4  | 0 | 0 | 0 | 0 | 0 | 0 | 0 |
| 0 | 0 | 0 | 5  | 0 | 0 | 0 | 0 | 0 | 0 | 0 |
| 0 | 0 | 1 | 16 | 0 | 0 | 0 | 0 | 0 | 0 | 0 |
| 0 | 0 | 0 | 9  | 0 | 0 | 0 | 0 | 0 | 0 | 0 |
| 0 | 0 | 1 | 22 | 0 | 1 | 0 | 0 | 0 | 0 | 0 |
| 0 | 0 | 0 | 21 | 0 | 0 | 0 | 0 | 0 | 0 | 0 |
| 0 | 0 | 0 | 13 | 0 | 0 | 0 | 0 | 0 | 0 | 0 |
| 0 | 0 | 0 | 13 | 0 | 0 | 0 | 0 | 0 | 0 | 0 |
| 0 | 0 | 0 | 10 | 0 | 0 | 0 | 0 | 0 | 0 | 0 |
| 0 | 0 | 0 | 29 | 0 | 0 | 0 | 0 | 0 | 0 | 0 |
| 0 | 0 | 0 | 7  | 0 | 0 | 0 | 0 | 0 | 0 | 0 |
| 0 | 0 | 0 | 49 | 0 | 0 | 0 | 0 | 1 | 0 | 0 |
| 0 | 0 | 0 | 66 | 0 | 0 | 0 | 0 | 0 | 0 | 0 |
| 0 | 1 | 0 | 51 | 0 | 0 | 0 | 0 | 0 | 0 | 0 |
| 0 | 0 | 0 | 10 | 0 | 0 | 0 | 0 | 0 | 0 | 0 |
| 0 | 0 | 0 | 38 | 0 | 0 | 0 | 0 | 0 | 0 | 0 |
| 0 | 0 | 0 | 16 | 0 | 0 | 0 | 0 | 0 | 0 | 0 |
| 0 | 0 | 0 | 38 | 0 | 0 | 0 | 0 | 0 | 0 | 0 |
| 0 | 0 | 0 | 19 | 0 | 2 | 0 | 0 | 0 | 0 | 0 |
| 0 | 0 | 0 | 32 | 0 | 1 | 0 | 0 | 0 | 0 | 0 |

|   |   |   |    |   |   |   |   |   |   |   |
|---|---|---|----|---|---|---|---|---|---|---|
| 0 | 0 | 0 | 38 | 0 | 0 | 0 | 0 | 0 | 0 | 0 |
| 0 | 0 | 0 | 32 | 0 | 0 | 1 | 0 | 0 | 0 | 0 |
| 0 | 0 | 0 | 39 | 0 | 0 | 1 | 0 | 0 | 0 | 0 |
| 0 | 0 | 0 | 15 | 0 | 0 | 0 | 0 | 1 | 0 | 0 |
| 0 | 0 | 0 | 40 | 0 | 0 | 0 | 0 | 0 | 0 | 0 |
| 0 | 0 | 0 | 11 | 0 | 0 | 0 | 0 | 0 | 0 | 0 |
| 0 | 1 | 0 | 22 | 0 | 0 | 0 | 0 | 0 | 0 | 0 |
| 0 | 0 | 0 | 46 | 0 | 0 | 0 | 0 | 0 | 0 | 0 |
| 0 | 0 | 0 | 43 | 0 | 0 | 0 | 0 | 0 | 0 | 0 |
| 0 | 0 | 0 | 17 | 0 | 0 | 0 | 0 | 0 | 0 | 0 |
| 0 | 0 | 0 | 16 | 0 | 0 | 0 | 0 | 0 | 0 | 0 |
| 0 | 0 | 0 | 15 | 0 | 1 | 1 | 0 | 0 | 0 | 0 |
| 0 | 0 | 0 | 26 | 0 | 0 | 0 | 0 | 0 | 0 | 0 |
| 0 | 0 | 0 | 11 | 0 | 0 | 1 | 0 | 0 | 0 | 0 |
| 0 | 0 | 0 | 25 | 0 | 0 | 0 | 0 | 0 | 0 | 0 |
| 0 | 0 | 0 | 5  | 0 | 0 | 0 | 0 | 0 | 0 | 0 |
| 0 | 0 | 0 | 39 | 0 | 0 | 0 | 0 | 0 | 0 | 0 |
| 0 | 0 | 0 | 17 | 0 | 0 | 0 | 0 | 0 | 0 | 0 |
| 0 | 0 | 0 | 15 | 0 | 1 | 0 | 0 | 0 | 0 | 0 |
| 0 | 0 | 0 | 6  | 0 | 0 | 0 | 0 | 0 | 0 | 0 |
| 0 | 0 | 0 | 16 | 0 | 0 | 1 | 0 | 0 | 0 | 0 |
| 0 | 0 | 0 | 11 | 0 | 1 | 0 | 0 | 0 | 0 | 0 |
| 0 | 0 | 0 | 8  | 0 | 4 | 0 | 0 | 0 | 0 | 0 |
| 0 | 0 | 0 | 8  | 0 | 0 | 1 | 0 | 0 | 0 | 0 |
| 0 | 0 | 0 | 7  | 0 | 0 | 0 | 0 | 0 | 0 | 0 |
| 0 | 0 | 0 | 0  | 0 | 2 | 0 | 0 | 0 | 0 | 0 |
| 0 | 0 | 0 | 1  | 0 | 8 | 1 | 0 | 0 | 0 | 0 |
| 0 | 0 | 0 | 5  | 0 | 1 | 0 | 0 | 0 | 0 | 0 |
| 0 | 0 | 0 | 4  | 0 | 2 | 0 | 0 | 0 | 0 | 0 |

|   |   |   |   |   |    |   |   |   |   |   |
|---|---|---|---|---|----|---|---|---|---|---|
| 0 | 0 | 0 | 0 | 0 | 1  | 0 | 0 | 0 | 0 | 0 |
| 0 | 0 | 0 | 3 | 0 | 1  | 0 | 0 | 0 | 0 | 0 |
| 2 | 0 | 0 | 0 | 0 | 0  | 1 | 0 | 0 | 0 | 0 |
| 0 | 0 | 0 | 0 | 0 | 1  | 0 | 0 | 0 | 0 | 0 |
| 0 | 0 | 0 | 0 | 0 | 0  | 1 | 0 | 0 | 0 | 0 |
| 0 | 0 | 0 | 2 | 0 | 0  | 2 | 0 | 0 | 0 | 0 |
| 0 | 0 | 0 | 0 | 0 | 8  | 1 | 0 | 0 | 0 | 0 |
| 0 | 0 | 0 | 1 | 0 | 1  | 2 | 0 | 0 | 0 | 0 |
| 0 | 0 | 0 | 1 | 0 | 6  | 0 | 0 | 0 | 0 | 0 |
| 0 | 0 | 0 | 1 | 0 | 7  | 1 | 0 | 0 | 0 | 0 |
| 0 | 0 | 0 | 0 | 0 | 3  | 2 | 0 | 0 | 0 | 0 |
| 0 | 0 | 0 | 1 | 0 | 4  | 1 | 0 | 0 | 0 | 0 |
| 0 | 0 | 0 | 0 | 0 | 2  | 0 | 0 | 0 | 0 | 0 |
| 0 | 0 | 0 | 0 | 0 | 2  | 2 | 0 | 0 | 0 | 0 |
| 0 | 0 | 0 | 0 | 0 | 8  | 0 | 0 | 0 | 0 | 0 |
| 0 | 0 | 0 | 0 | 0 | 11 | 2 | 1 | 0 | 0 | 0 |
| 0 | 0 | 0 | 0 | 0 | 2  | 0 | 0 | 0 | 0 | 0 |
| 0 | 0 | 0 | 0 | 0 | 7  | 1 | 0 | 0 | 0 | 0 |
| 0 | 0 | 0 | 0 | 0 | 3  | 0 | 0 | 0 | 0 | 0 |
| 0 | 0 | 0 | 0 | 0 | 6  | 1 | 0 | 0 | 0 | 0 |
| 0 | 0 | 0 | 0 | 0 | 2  | 3 | 0 | 0 | 0 | 0 |
| 0 | 0 | 0 | 0 | 0 | 1  | 0 | 0 | 0 | 0 | 0 |
| 0 | 0 | 0 | 0 | 0 | 10 | 1 | 0 | 0 | 0 | 0 |
| 0 | 0 | 0 | 0 | 0 | 1  | 0 | 0 | 0 | 0 | 0 |
| 0 | 0 | 0 | 0 | 1 | 0  | 0 | 0 | 0 | 0 | 0 |
| 0 | 0 | 0 | 0 | 0 | 3  | 0 | 0 | 0 | 0 | 0 |
| 0 | 0 | 0 | 0 | 0 | 0  | 0 | 0 | 0 | 0 | 0 |
| 0 | 0 | 0 | 0 | 0 | 1  | 2 | 0 | 0 | 0 | 0 |
| 0 | 0 | 0 | 0 | 0 | 2  | 0 | 0 | 0 | 0 | 0 |

|   |   |   |    |   |   |   |   |   |   |   |
|---|---|---|----|---|---|---|---|---|---|---|
| 0 | 0 | 0 | 0  | 0 | 0 | 1 | 0 | 0 | 0 | 0 |
| 0 | 0 | 0 | 0  | 0 | 1 | 0 | 0 | 1 | 0 | 0 |
| 0 | 0 | 0 | 0  | 0 | 0 | 0 | 0 | 0 | 0 | 0 |
| 0 | 0 | 0 | 0  | 0 | 1 | 0 | 0 | 1 | 0 | 0 |
| 0 | 0 | 0 | 0  | 0 | 0 | 0 | 0 | 0 | 0 | 0 |
| 0 | 0 | 0 | 0  | 0 | 5 | 1 | 0 | 0 | 0 | 0 |
| 0 | 0 | 0 | 0  | 0 | 1 | 0 | 0 | 1 | 0 | 0 |
| 0 | 0 | 0 | 0  | 0 | 3 | 0 | 0 | 0 | 0 | 0 |
| 0 | 0 | 0 | 92 | 0 | 0 | 0 | 0 | 0 | 0 | 0 |
| 0 | 0 | 0 | 0  | 0 | 0 | 0 | 0 | 0 | 0 | 0 |
| 0 | 0 | 0 | 0  | 0 | 0 | 0 | 0 | 0 | 0 | 0 |
| 0 | 0 | 0 | 0  | 0 | 1 | 0 | 0 | 0 | 0 | 0 |
| 0 | 0 | 0 | 0  | 0 | 0 | 0 | 0 | 0 | 0 | 0 |
| 0 | 0 | 0 | 0  | 0 | 2 | 0 | 0 | 0 | 0 | 0 |
| 0 | 0 | 0 | 0  | 0 | 1 | 0 | 0 | 0 | 0 | 0 |
| 0 | 0 | 0 | 0  | 0 | 0 | 0 | 0 | 0 | 0 | 0 |
| 0 | 0 | 0 | 0  | 0 | 0 | 1 | 0 | 0 | 0 | 0 |
| 0 | 0 | 0 | 0  | 0 | 0 | 0 | 3 | 0 | 0 | 0 |
| 0 | 0 | 0 | 0  | 0 | 1 | 0 | 0 | 0 | 0 | 0 |
| 0 | 0 | 0 | 0  | 0 | 0 | 0 | 0 | 0 | 0 | 0 |
| 0 | 0 | 0 | 0  | 0 | 0 | 1 | 0 | 0 | 0 | 0 |
| 0 | 0 | 0 | 0  | 0 | 1 | 0 | 0 | 0 | 0 | 0 |
| 0 | 0 | 0 | 0  | 0 | 1 | 0 | 0 | 0 | 0 | 0 |
| 0 | 0 | 0 | 1  | 0 | 0 | 0 | 0 | 0 | 0 | 0 |
| 0 | 0 | 0 | 0  | 0 | 2 | 0 | 0 | 0 | 0 | 0 |
| 0 | 0 | 0 | 0  | 0 | 3 | 3 | 0 | 0 | 0 | 0 |
| 0 | 0 | 0 | 1  | 0 | 4 | 0 | 0 | 0 | 0 | 0 |
| 0 | 0 | 0 | 1  | 0 | 3 | 0 | 0 | 0 | 0 | 0 |
| 0 | 0 | 0 | 0  | 0 | 2 | 2 | 0 | 0 | 0 | 0 |

|   |   |   |    |   |   |   |   |   |   |   |
|---|---|---|----|---|---|---|---|---|---|---|
| 0 | 0 | 0 | 0  | 0 | 2 | 0 | 0 | 1 | 0 | 0 |
| 0 | 0 | 0 | 0  | 0 | 0 | 2 | 0 | 1 | 0 | 0 |
| 0 | 0 | 0 | 0  | 0 | 1 | 0 | 0 | 0 | 0 | 0 |
| 0 | 0 | 0 | 0  | 0 | 2 | 4 | 0 | 0 | 0 | 0 |
| 1 | 0 | 0 | 0  | 0 | 3 | 2 | 0 | 0 | 0 | 0 |
| 0 | 0 | 0 | 4  | 0 | 7 | 5 | 0 | 0 | 0 | 0 |
| 0 | 0 | 0 | 0  | 0 | 0 | 2 | 0 | 0 | 0 | 0 |
| 0 | 0 | 0 | 0  | 0 | 4 | 4 | 0 | 0 | 0 | 0 |
| 0 | 0 | 0 | 5  | 0 | 0 | 0 | 0 | 0 | 0 | 0 |
| 0 | 0 | 0 | 1  | 0 | 1 | 2 | 0 | 0 | 0 | 0 |
| 0 | 0 | 0 | 0  | 0 | 2 | 0 | 0 | 0 | 0 | 0 |
| 0 | 0 | 0 | 1  | 0 | 1 | 2 | 0 | 0 | 0 | 0 |
| 0 | 0 | 0 | 2  | 0 | 4 | 2 | 0 | 0 | 0 | 0 |
| 0 | 0 | 0 | 1  | 0 | 0 | 4 | 0 | 0 | 0 | 0 |
| 0 | 0 | 0 | 5  | 0 | 1 | 1 | 0 | 0 | 0 | 0 |
| 0 | 0 | 0 | 9  | 0 | 0 | 3 | 0 | 0 | 0 | 0 |
| 0 | 0 | 0 | 4  | 0 | 2 | 0 | 0 | 0 | 0 | 0 |
| 0 | 0 | 0 | 13 | 0 | 0 | 0 | 0 | 0 | 0 | 0 |
| 0 | 0 | 0 | 20 | 0 | 0 | 1 | 0 | 0 | 0 | 0 |
| 0 | 0 | 0 | 9  | 0 | 3 | 1 | 0 | 0 | 0 | 0 |
| 0 | 0 | 0 | 17 | 0 | 3 | 0 | 0 | 0 | 0 | 0 |
| 0 | 0 | 0 | 58 | 0 | 2 | 1 | 0 | 0 | 0 | 0 |
| 0 | 0 | 0 | 29 | 0 | 2 | 1 | 0 | 0 | 0 | 0 |
| 0 | 0 | 0 | 37 | 0 | 1 | 0 | 0 | 0 | 0 | 0 |
| 0 | 0 | 0 | 20 | 0 | 0 | 0 | 0 | 1 | 0 | 0 |
| 0 | 0 | 0 | 17 | 0 | 0 | 0 | 0 | 0 | 0 | 0 |
| 0 | 0 | 0 | 20 | 0 | 0 | 0 | 0 | 0 | 0 | 0 |
| 0 | 0 | 0 | 28 | 0 | 0 | 0 | 0 | 0 | 0 | 0 |
| 0 | 0 | 0 | 16 | 0 | 0 | 0 | 0 | 0 | 0 | 0 |

|   |   |   |    |   |   |   |   |   |   |   |
|---|---|---|----|---|---|---|---|---|---|---|
| 0 | 0 | 0 | 10 | 0 | 0 | 0 | 0 | 0 | 0 | 0 |
| 0 | 0 | 0 | 9  | 0 | 0 | 1 | 0 | 0 | 0 | 0 |
| 0 | 0 | 0 | 8  | 0 | 0 | 0 | 0 | 0 | 0 | 0 |
| 0 | 1 | 0 | 6  | 0 | 0 | 0 | 0 | 0 | 0 | 0 |
| 0 | 0 | 0 | 18 | 0 | 0 | 0 | 0 | 0 | 0 | 0 |
| 0 | 0 | 0 | 4  | 0 | 0 | 0 | 0 | 0 | 0 | 0 |
| 0 | 0 | 0 | 12 | 0 | 0 | 0 | 0 | 0 | 0 | 0 |
| 0 | 0 | 0 | 19 | 0 | 0 | 0 | 0 | 0 | 0 | 0 |
| 0 | 0 | 0 | 10 | 0 | 0 | 0 | 0 | 0 | 0 | 0 |
| 0 | 0 | 0 | 45 | 0 | 1 | 0 | 0 | 0 | 0 | 0 |
| 0 | 0 | 1 | 15 | 0 | 0 | 0 | 0 | 0 | 0 | 0 |
| 0 | 0 | 0 | 23 | 0 | 0 | 0 | 0 | 0 | 0 | 0 |
| 0 | 0 | 0 | 29 | 0 | 0 | 0 | 0 | 0 | 0 | 0 |
| 0 | 1 | 0 | 27 | 0 | 0 | 1 | 0 | 0 | 0 | 0 |
| 0 | 0 | 0 | 50 | 0 | 0 | 0 | 0 | 0 | 0 | 0 |
| 0 | 0 | 0 | 39 | 0 | 0 | 0 | 0 | 4 | 0 | 0 |
| 0 | 0 | 1 | 67 | 0 | 0 | 0 | 0 | 0 | 0 | 0 |
| 0 | 0 | 0 | 37 | 0 | 0 | 0 | 0 | 0 | 0 | 0 |
| 0 | 0 | 0 | 48 | 0 | 1 | 0 | 0 | 0 | 0 | 0 |
| 0 | 1 | 0 | 64 | 0 | 0 | 0 | 0 | 0 | 0 | 0 |
| 0 | 0 | 1 | 50 | 0 | 1 | 0 | 0 | 0 | 0 | 0 |
| 0 | 0 | 1 | 60 | 0 | 0 | 0 | 0 | 0 | 0 | 0 |
| 0 | 0 | 1 | 24 | 0 | 0 | 0 | 0 | 0 | 0 | 0 |
| 0 | 0 | 0 | 23 | 0 | 0 | 0 | 0 | 0 | 0 | 0 |
| 0 | 1 | 0 | 43 | 0 | 0 | 0 | 0 | 0 | 0 | 0 |
| 0 | 0 | 0 | 42 | 0 | 0 | 0 | 0 | 0 | 0 | 0 |
| 0 | 0 | 0 | 34 | 0 | 0 | 0 | 0 | 0 | 0 | 0 |
| 0 | 0 | 0 | 20 | 0 | 0 | 0 | 0 | 0 | 0 | 0 |
| 0 | 0 | 1 | 20 | 0 | 0 | 0 | 0 | 0 | 0 | 0 |

|   |   |   |    |   |   |   |   |   |   |   |   |
|---|---|---|----|---|---|---|---|---|---|---|---|
| 0 | 0 | 0 | 70 | 0 | 0 | 0 | 0 | 0 | 0 | 0 | 0 |
| 0 | 0 | 0 | 29 | 0 | 0 | 0 | 0 | 0 | 0 | 0 | 0 |
| 0 | 0 | 0 | 20 | 0 | 0 | 1 | 0 | 0 | 0 | 0 | 0 |
| 0 | 0 | 0 | 22 | 0 | 0 | 0 | 0 | 0 | 0 | 0 | 0 |
| 0 | 0 | 0 | 26 | 0 | 0 | 0 | 0 | 0 | 0 | 0 | 0 |
| 0 | 0 | 0 | 19 | 0 | 0 | 0 | 0 | 0 | 0 | 0 | 0 |
| 0 | 0 | 0 | 17 | 0 | 0 | 0 | 0 | 0 | 0 | 0 | 0 |
| 0 | 0 | 0 | 0  | 0 | 1 | 0 | 0 | 0 | 0 | 0 | 0 |
| 0 | 0 | 0 | 21 | 0 | 0 | 0 | 0 | 0 | 0 | 0 | 0 |
| 0 | 0 | 0 | 0  | 0 | 3 | 0 | 0 | 0 | 0 | 0 | 0 |
| 0 | 0 | 0 | 6  | 0 | 0 | 0 | 0 | 0 | 0 | 0 | 0 |
| 0 | 1 | 0 | 22 | 0 | 0 | 0 | 0 | 0 | 0 | 0 | 0 |
| 0 | 0 | 0 | 2  | 0 | 0 | 0 | 0 | 0 | 0 | 0 | 0 |
| 0 | 0 | 0 | 12 | 0 | 0 | 0 | 0 | 0 | 1 | 0 | 0 |
| 0 | 1 | 0 | 15 | 0 | 0 | 0 | 0 | 0 | 0 | 0 | 0 |
| 0 | 0 | 0 | 7  | 0 | 0 | 0 | 0 | 0 | 0 | 0 | 0 |
| 0 | 0 | 2 | 6  | 0 | 0 | 0 | 0 | 0 | 0 | 0 | 0 |
| 0 | 0 | 0 | 15 | 0 | 0 | 0 | 0 | 0 | 0 | 0 | 0 |
| 0 | 0 | 0 | 5  | 0 | 0 | 0 | 0 | 0 | 0 | 0 | 0 |

| ausmod | ausstu | bocsyr | bts | capite | cerato | chaeto | chigla | collem | comgla | comisp |
|--------|--------|--------|-----|--------|--------|--------|--------|--------|--------|--------|
| 0      | 0      | 0      | 0   | 0      | 3      | 0      | 0      | 0      | 1      | 0      |
| 0      | 1      | 0      | 0   | 0      | 2      | 0      | 0      | 1      | 0      | 0      |
| 0      | 0      | 0      | 0   | 2      | 8      | 0      | 0      | 2      | 0      | 0      |
| 0      | 7      | 0      | 0   | 0      | 11     | 0      | 0      | 1      | 0      | 0      |
| 0      | 0      | 0      | 0   | 0      | 2      | 0      | 0      | 0      | 0      | 0      |
| 0      | 0      | 0      | 0   | 0      | 4      | 0      | 0      | 0      | 1      | 0      |
| 0      | 1      | 0      | 0   | 0      | 2      | 0      | 0      | 0      | 0      | 0      |
| 0      | 3      | 0      | 0   | 0      | 0      | 0      | 0      | 8      | 0      | 0      |



|   |    |   |   |   |    |   |   |   |   |   |
|---|----|---|---|---|----|---|---|---|---|---|
| 0 | 0  | 0 | 0 | 0 | 8  | 0 | 0 | 0 | 0 | 0 |
| 0 | 1  | 0 | 0 | 0 | 1  | 0 | 0 | 1 | 0 | 0 |
| 0 | 5  | 0 | 0 | 0 | 4  | 0 | 0 | 0 | 1 | 0 |
| 0 | 17 | 0 | 0 | 0 | 6  | 0 | 0 | 0 | 0 | 0 |
| 0 | 19 | 0 | 0 | 0 | 5  | 0 | 0 | 0 | 0 | 0 |
| 0 | 5  | 0 | 0 | 0 | 4  | 0 | 0 | 0 | 0 | 0 |
| 0 | 18 | 0 | 0 | 0 | 0  | 0 | 0 | 1 | 0 | 0 |
| 0 | 10 | 0 | 0 | 0 | 3  | 0 | 0 | 0 | 0 | 0 |
| 0 | 14 | 0 | 0 | 0 | 0  | 0 | 0 | 0 | 0 | 0 |
| 0 | 10 | 0 | 0 | 0 | 3  | 0 | 0 | 0 | 0 | 0 |
| 0 | 18 | 0 | 0 | 0 | 0  | 0 | 0 | 2 | 0 | 0 |
| 1 | 36 | 0 | 0 | 0 | 6  | 0 | 1 | 0 | 1 | 0 |
| 0 | 0  | 0 | 0 | 1 | 2  | 0 | 0 | 0 | 1 | 0 |
| 0 | 0  | 0 | 0 | 0 | 9  | 0 | 0 | 0 | 0 | 0 |
| 0 | 0  | 0 | 0 | 0 | 0  | 0 | 0 | 1 | 2 | 0 |
| 0 | 3  | 0 | 0 | 0 | 1  | 0 | 0 | 2 | 0 | 0 |
| 0 | 2  | 0 | 0 | 0 | 11 | 0 | 0 | 0 | 0 | 0 |
| 0 | 1  | 0 | 0 | 0 | 0  | 0 | 0 | 0 | 1 | 0 |
| 0 | 0  | 0 | 0 | 0 | 11 | 0 | 0 | 1 | 0 | 0 |
| 0 | 1  | 0 | 0 | 1 | 6  | 0 | 0 | 0 | 0 | 0 |
| 0 | 1  | 0 | 0 | 0 | 0  | 0 | 0 | 3 | 0 | 0 |
| 0 | 0  | 0 | 0 | 0 | 3  | 0 | 0 | 2 | 0 | 0 |
| 0 | 0  | 0 | 0 | 0 | 24 | 0 | 0 | 2 | 0 | 0 |
| 0 | 0  | 0 | 0 | 0 | 9  | 0 | 0 | 2 | 0 | 0 |
| 0 | 0  | 0 | 0 | 2 | 7  | 0 | 0 | 3 | 0 | 0 |
| 0 | 0  | 0 | 0 | 0 | 2  | 0 | 0 | 0 | 1 | 0 |
| 0 | 3  | 0 | 0 | 0 | 2  | 0 | 0 | 0 | 0 | 0 |
| 0 | 2  | 0 | 0 | 0 | 3  | 0 | 0 | 2 | 1 | 0 |
| 0 | 0  | 0 | 0 | 0 | 10 | 0 | 0 | 0 | 0 | 0 |
| 0 | 0  | 0 | 0 | 0 | 8  | 0 | 0 | 1 | 0 | 0 |

|   |   |   |   |   |    |   |   |   |   |   |
|---|---|---|---|---|----|---|---|---|---|---|
| 0 | 1 | 0 | 0 | 1 | 12 | 0 | 0 | 0 | 0 | 0 |
| 0 | 0 | 0 | 0 | 1 | 4  | 0 | 0 | 2 | 0 | 0 |
| 0 | 0 | 0 | 0 | 0 | 0  | 0 | 0 | 1 | 0 | 0 |
| 0 | 0 | 0 | 0 | 0 | 4  | 0 | 0 | 0 | 1 | 0 |
| 0 | 5 | 0 | 0 | 0 | 6  | 0 | 0 | 0 | 1 | 0 |
| 0 | 0 | 0 | 0 | 0 | 2  | 0 | 0 | 0 | 0 | 0 |
| 0 | 1 | 0 | 0 | 0 | 5  | 0 | 0 | 0 | 0 | 0 |
| 0 | 1 | 0 | 0 | 0 | 3  | 0 | 0 | 0 | 0 | 0 |
| 0 | 2 | 0 | 0 | 1 | 5  | 0 | 0 | 0 | 0 | 0 |
| 0 | 0 | 0 | 0 | 0 | 4  | 0 | 0 | 0 | 0 | 0 |
| 0 | 1 | 0 | 0 | 0 | 2  | 0 | 0 | 0 | 0 | 0 |
| 0 | 1 | 0 | 0 | 3 | 9  | 0 | 0 | 0 | 0 | 0 |
| 0 | 2 | 0 | 0 | 0 | 14 | 0 | 0 | 0 | 1 | 0 |
| 3 | 4 | 0 | 0 | 0 | 5  | 0 | 0 | 0 | 0 | 0 |
| 0 | 0 | 0 | 0 | 0 | 5  | 0 | 0 | 0 | 0 | 0 |
| 0 | 0 | 0 | 0 | 0 | 3  | 0 | 0 | 0 | 0 | 0 |
| 0 | 0 | 0 | 0 | 0 | 6  | 0 | 0 | 1 | 0 | 0 |
| 0 | 0 | 0 | 0 | 0 | 1  | 0 | 0 | 0 | 0 | 0 |
| 0 | 0 | 0 | 0 | 0 | 3  | 0 | 0 | 0 | 0 | 0 |
| 0 | 0 | 0 | 0 | 0 | 3  | 0 | 0 | 0 | 0 | 0 |
| 0 | 1 | 0 | 0 | 0 | 5  | 0 | 0 | 0 | 0 | 0 |
| 0 | 2 | 0 | 0 | 1 | 2  | 0 | 0 | 0 | 0 | 0 |
| 0 | 2 | 0 | 0 | 1 | 5  | 0 | 0 | 0 | 2 | 0 |
| 0 | 2 | 0 | 0 | 0 | 2  | 0 | 0 | 0 | 0 | 0 |
| 0 | 0 | 0 | 0 | 0 | 8  | 0 | 0 | 0 | 4 | 0 |
| 0 | 0 | 0 | 0 | 0 | 2  | 0 | 0 | 0 | 0 | 0 |
| 0 | 0 | 0 | 0 | 0 | 3  | 0 | 0 | 0 | 0 | 0 |
| 1 | 4 | 0 | 0 | 0 | 4  | 0 | 0 | 0 | 0 | 0 |
| 0 | 3 | 0 | 0 | 0 | 1  | 0 | 0 | 1 | 1 | 0 |

|   |    |   |
|---|----|---|
| 0 | 0  | 0 |
| 0 | 1  | 0 |
| 0 | 1  | 0 |
| 0 | 3  | 1 |
| 0 | 0  | 0 |
| 0 | 2  | 0 |
| 0 | 0  | 0 |
| 0 | 0  | 0 |
| 0 | 0  | 0 |
| 0 | 3  | 0 |
| 0 | 2  | 0 |
| 0 | 0  | 0 |
| 0 | 0  | 0 |
| 0 | 1  | 0 |
| 0 | 1  | 0 |
| 0 | 2  | 0 |
| 0 | 1  | 0 |
| 0 | 3  | 0 |
| 0 | 3  | 0 |
| 0 | 5  | 0 |
| 0 | 0  | 0 |
| 0 | 2  | 0 |
| 0 | 6  | 0 |
| 0 | 3  | 0 |
| 0 | 5  | 0 |
| 0 | 10 | 0 |
| 0 | 7  | 0 |
| 0 | 3  | 0 |
| 0 | 4  | 0 |

|   |   |    |
|---|---|----|
| 0 | 0 | 4  |
| 0 | 0 | 7  |
| 0 | 0 | 9  |
| 0 | 0 | 8  |
| 0 | 0 | 7  |
| 0 | 0 | 5  |
| 0 | 0 | 6  |
| 0 | 0 | 12 |
| 0 | 0 | 10 |
| 0 | 1 | 1  |
| 0 | 0 | 11 |
| 0 | 0 | 5  |
| 0 | 0 | 7  |
| 0 | 0 | 2  |
| 0 | 0 | 9  |
| 0 | 0 | 2  |
| 0 | 0 | 12 |
| 0 | 0 | 10 |
| 0 | 0 | 11 |
| 0 | 0 | 5  |
| 0 | 0 | 5  |
| 0 | 0 | 4  |
| 0 | 0 | 7  |
| 0 | 0 | 7  |
| 0 | 0 | 0  |
| 0 | 0 | 2  |
| 0 | 1 | 15 |
| 0 | 0 | 9  |
| 0 | 0 | 8  |

|   |   |   |   |   |
|---|---|---|---|---|
| 0 | 0 | 1 | 0 | 0 |
| 0 | 0 | 1 | 0 | 0 |
| 0 | 0 | 0 | 0 | 0 |
| 0 | 0 | 0 | 0 | 0 |
| 0 | 0 | 0 | 0 | 0 |
| 0 | 0 | 1 | 0 | 0 |
| 0 | 0 | 1 | 0 | 0 |
| 0 | 0 | 0 | 1 | 0 |
| 0 | 0 | 0 | 0 | 0 |
| 0 | 0 | 0 | 1 | 0 |
| 0 | 0 | 0 | 0 | 0 |
| 0 | 0 | 0 | 0 | 0 |
| 0 | 0 | 0 | 0 | 0 |
| 0 | 0 | 1 | 1 | 0 |
| 0 | 0 | 2 | 0 | 0 |
| 0 | 0 | 2 | 1 | 0 |
| 0 | 0 | 0 | 0 | 0 |
| 0 | 0 | 2 | 1 | 0 |
| 0 | 0 | 0 | 0 | 0 |
| 0 | 0 | 0 | 0 | 0 |
| 0 | 0 | 2 | 2 | 0 |
| 0 | 0 | 2 | 1 | 0 |
| 0 | 0 | 0 | 0 | 0 |
| 0 | 0 | 0 | 0 | 0 |
| 0 | 0 | 1 | 0 | 0 |
| 0 | 0 | 0 | 2 | 0 |
| 0 | 0 | 0 | 0 | 0 |

|   |    |   |   |   |    |   |   |   |   |   |
|---|----|---|---|---|----|---|---|---|---|---|
| 0 | 11 | 0 | 0 | 0 | 0  | 0 | 0 | 1 | 1 | 0 |
| 0 | 5  | 0 | 0 | 0 | 7  | 0 | 0 | 0 | 0 | 0 |
| 0 | 1  | 0 | 0 | 0 | 10 | 0 | 0 | 0 | 0 | 0 |
| 0 | 12 | 0 | 0 | 0 | 5  | 0 | 1 | 0 | 0 | 0 |
| 0 | 8  | 0 | 0 | 2 | 3  | 0 | 0 | 0 | 0 | 0 |
| 0 | 6  | 0 | 0 | 0 | 0  | 0 | 0 | 0 | 0 | 0 |
| 0 | 4  | 0 | 0 | 0 | 1  | 0 | 0 | 0 | 0 | 0 |
| 0 | 14 | 0 | 0 | 0 | 3  | 0 | 0 | 0 | 0 | 0 |
| 0 | 24 | 0 | 0 | 0 | 6  | 0 | 0 | 0 | 1 | 0 |
| 1 | 12 | 0 | 0 | 0 | 13 | 0 | 0 | 1 | 2 | 0 |
| 0 | 22 | 0 | 0 | 0 | 7  | 0 | 1 | 1 | 0 | 0 |
| 0 | 20 | 0 | 0 | 1 | 26 | 0 | 0 | 0 | 0 | 0 |
| 0 | 6  | 0 | 0 | 1 | 3  | 0 | 0 | 0 | 0 | 0 |
| 0 | 9  | 0 | 0 | 0 | 0  | 0 | 0 | 0 | 0 | 0 |
| 0 | 3  | 0 | 0 | 1 | 3  | 0 | 2 | 0 | 0 | 0 |
| 0 | 6  | 0 | 0 | 0 | 0  | 0 | 1 | 0 | 0 | 1 |
| 0 | 4  | 0 | 0 | 0 | 5  | 0 | 0 | 1 | 0 | 0 |
| 0 | 3  | 0 | 0 | 0 | 5  | 0 | 1 | 1 | 1 | 0 |
| 0 | 9  | 0 | 0 | 0 | 1  | 0 | 0 | 0 | 0 | 0 |
| 0 | 2  | 0 | 0 | 0 | 4  | 0 | 0 | 0 | 0 | 0 |
| 0 | 5  | 0 | 0 | 0 | 9  | 0 | 0 | 0 | 0 | 0 |
| 0 | 9  | 0 | 0 | 0 | 1  | 0 | 0 | 0 | 0 | 0 |
| 0 | 2  | 0 | 0 | 1 | 12 | 0 | 0 | 0 | 0 | 0 |
| 0 | 9  | 0 | 0 | 0 | 7  | 0 | 1 | 0 | 0 | 0 |
| 0 | 6  | 1 | 0 | 1 | 8  | 0 | 0 | 1 | 2 | 0 |
| 0 | 2  | 0 | 0 | 0 | 0  | 0 | 0 | 0 | 4 | 0 |
| 0 | 2  | 0 | 0 | 0 | 1  | 0 | 0 | 1 | 0 | 0 |
| 0 | 9  | 0 | 0 | 0 | 6  | 0 | 0 | 0 | 0 | 0 |
| 0 | 3  | 0 | 0 | 0 | 9  | 0 | 0 | 0 | 1 | 0 |

|   |   |   |   |   |    |   |   |   |   |
|---|---|---|---|---|----|---|---|---|---|
| 0 | 2 | 0 | 0 | 0 | 0  | 0 | 1 | 1 | 0 |
| 0 | 4 | 0 | 0 | 0 | 10 | 0 | 3 | 0 | 0 |
| 0 | 1 | 0 | 0 | 0 | 10 | 0 | 1 | 0 | 0 |
| 0 | 1 | 0 | 0 | 0 | 2  | 0 | 0 | 1 | 0 |
| 0 | 4 | 0 | 0 | 0 | 9  | 0 | 3 | 0 | 0 |
| 0 | 2 | 0 | 0 | 0 | 12 | 0 | 0 | 0 | 0 |
| 0 | 2 | 0 | 0 | 0 | 9  | 0 | 0 | 2 | 0 |
| 0 | 1 | 0 | 0 | 0 | 7  | 0 | 0 | 2 | 0 |
| 0 | 0 | 0 | 0 | 0 | 13 | 0 | 2 | 0 | 0 |
| 0 | 3 | 0 | 0 | 0 | 13 | 0 | 0 | 0 | 0 |
| 0 | 1 | 0 | 0 | 0 | 5  | 0 | 1 | 0 | 0 |
| 0 | 5 | 0 | 0 | 0 | 3  | 0 | 0 | 1 | 0 |
| 0 | 0 | 0 | 0 | 0 | 4  | 0 | 0 | 0 | 0 |
| 0 | 2 | 0 | 0 | 0 | 5  | 0 | 0 | 0 | 0 |
| 0 | 3 | 0 | 0 | 0 | 16 | 0 | 0 | 2 | 0 |
| 0 | 4 | 0 | 0 | 0 | 2  | 0 | 0 | 0 | 0 |
| 0 | 0 | 0 | 0 | 0 | 7  | 0 | 0 | 0 | 0 |
| 0 | 2 | 0 | 0 | 0 | 0  | 0 | 0 | 0 | 0 |
| 0 | 5 | 0 | 0 | 0 | 5  | 0 | 0 | 0 | 0 |
| 0 | 0 | 0 | 0 | 0 | 10 | 0 | 0 | 1 | 0 |
| 0 | 0 | 0 | 0 | 0 | 3  | 0 | 0 | 1 | 0 |
| 0 | 2 | 0 | 0 | 0 | 11 | 0 | 0 | 0 | 0 |
| 0 | 2 | 0 | 0 | 0 | 8  | 0 | 0 | 0 | 0 |
| 0 | 0 | 0 | 0 | 0 | 6  | 0 | 0 | 0 | 0 |
| 0 | 0 | 0 | 0 | 0 | 0  | 0 | 0 | 0 | 0 |
| 0 | 0 | 0 | 0 | 0 | 5  | 0 | 0 | 0 | 0 |
| 0 | 1 | 0 | 0 | 0 | 4  | 0 | 0 | 0 | 0 |
| 0 | 1 | 0 | 0 | 0 | 4  | 0 | 0 | 1 | 0 |
| 0 | 2 | 0 | 0 | 0 | 0  | 0 | 1 | 0 | 0 |

|   |   |   |   |   |    |   |   |   |   |
|---|---|---|---|---|----|---|---|---|---|
| 0 | 1 | 0 | 0 | 0 | 7  | 0 | 0 | 1 | 0 |
| 0 | 0 | 0 | 0 | 0 | 11 | 0 | 0 | 1 | 0 |
| 0 | 0 | 0 | 0 | 0 | 7  | 0 | 0 | 3 | 1 |
| 1 | 1 | 0 | 0 | 0 | 3  | 0 | 0 | 0 | 0 |
| 0 | 1 | 0 | 0 | 0 | 11 | 0 | 0 | 0 | 0 |
| 0 | 1 | 0 | 0 | 0 | 3  | 0 | 0 | 0 | 2 |
| 0 | 1 | 0 | 0 | 0 | 0  | 0 | 0 | 0 | 0 |
| 0 | 2 | 0 | 0 | 0 | 3  | 0 | 0 | 0 | 0 |
| 0 | 2 | 0 | 0 | 0 | 3  | 0 | 0 | 0 | 0 |
| 0 | 0 | 0 | 0 | 0 | 7  | 0 | 0 | 0 | 1 |
| 0 | 0 | 0 | 0 | 0 | 4  | 0 | 0 | 2 | 0 |
| 0 | 2 | 0 | 0 | 0 | 0  | 0 | 0 | 0 | 0 |
| 0 | 0 | 0 | 0 | 0 | 4  | 0 | 0 | 0 | 1 |
| 0 | 0 | 0 | 0 | 0 | 6  | 0 | 0 | 0 | 0 |
| 1 | 0 | 0 | 0 | 0 | 5  | 0 | 0 | 0 | 0 |
| 0 | 4 | 0 | 0 | 0 | 4  | 0 | 0 | 0 | 0 |
| 0 | 0 | 0 | 0 | 0 | 7  | 0 | 0 | 2 | 1 |
| 0 | 0 | 0 | 0 | 0 | 6  | 0 | 0 | 0 | 1 |
| 0 | 0 | 0 | 0 | 0 | 1  | 0 | 0 | 0 | 0 |
| 0 | 2 | 0 | 0 | 0 | 2  | 0 | 0 | 0 | 0 |
| 1 | 1 | 0 | 0 | 0 | 5  | 0 | 0 | 0 | 0 |
| 0 | 0 | 0 | 0 | 0 | 15 | 0 | 0 | 1 | 0 |
| 0 | 1 | 0 | 0 | 0 | 2  | 1 | 0 | 0 | 0 |
| 0 | 0 | 0 | 0 | 0 | 3  | 0 | 0 | 0 | 0 |
| 0 | 1 | 0 | 0 | 0 | 0  | 0 | 0 | 0 | 1 |
| 0 | 1 | 0 | 0 | 0 | 4  | 0 | 0 | 0 | 0 |
| 0 | 2 | 0 | 0 | 0 | 2  | 0 | 0 | 0 | 0 |
| 0 | 2 | 0 | 0 | 0 | 1  | 0 | 0 | 0 | 0 |
| 0 | 1 | 0 | 0 | 0 | 2  | 0 | 0 | 0 | 0 |

|   |   |   |
|---|---|---|
| 0 | 3 | 0 |
| 0 | 2 | 0 |
| 0 | 0 | 0 |
| 0 | 0 | 0 |
| 0 | 0 | 0 |
| 0 | 1 | 0 |
| 0 | 1 | 1 |
| 0 | 2 | 0 |
| 0 | 1 | 0 |
| 0 | 0 | 0 |
| 0 | 0 | 0 |
| 0 | 0 | 0 |
| 0 | 0 | 0 |
| 0 | 2 | 0 |
| 0 | 0 | 0 |
| 0 | 0 | 0 |
| 0 | 1 | 0 |
| 0 | 2 | 0 |
| 0 | 0 | 0 |
| 0 | 2 | 0 |
| 0 | 0 | 0 |
| 0 | 1 | 0 |
| 0 | 1 | 0 |
| 0 | 0 | 2 |
| 0 | 2 | 1 |
| 0 | 1 | 0 |
| 0 | 3 | 0 |
| 0 | 0 | 0 |
| 0 | 3 | 0 |

|   |   |    |   |
|---|---|----|---|
| 0 | 0 | 7  | 0 |
| 0 | 0 | 6  | 0 |
| 0 | 0 | 4  | 0 |
| 0 | 1 | 4  | 0 |
| 0 | 0 | 8  | 0 |
| 0 | 0 | 4  | 0 |
| 0 | 0 | 2  | 0 |
| 0 | 1 | 1  | 1 |
| 0 | 0 | 14 | 0 |
| 0 | 1 | 0  | 0 |
| 0 | 0 | 18 | 0 |
| 0 | 0 | 1  | 0 |
| 0 | 0 | 3  | 0 |
| 0 | 0 | 12 | 0 |
| 0 | 1 | 6  | 0 |
| 0 | 0 | 2  | 0 |
| 0 | 0 | 0  | 0 |
| 0 | 0 | 7  | 0 |
| 0 | 0 | 0  | 0 |
| 0 | 0 | 8  | 0 |
| 0 | 0 | 10 | 0 |
| 0 | 0 | 5  | 0 |
| 0 | 0 | 3  | 0 |
| 0 | 1 | 6  | 0 |
| 0 | 0 | 2  | 0 |
| 0 | 1 | 2  | 0 |
| 0 | 0 | 20 | 0 |
| 0 | 0 | 6  | 0 |
| 0 | 0 | 3  | 0 |

|   |   |   |   |
|---|---|---|---|
| 0 | 0 | 0 | 0 |
| 0 | 0 | 0 | 0 |
| 0 | 1 | 0 | 0 |
| 0 | 0 | 0 | 0 |
| 0 | 3 | 0 | 0 |
| 0 | 0 | 0 | 0 |
| 0 | 0 | 0 | 0 |
| 0 | 1 | 1 | 0 |
| 0 | 0 | 1 | 0 |
| 0 | 0 | 0 | 0 |
| 0 | 2 | 0 | 0 |
| 0 | 1 | 2 | 0 |
| 0 | 0 | 0 | 0 |
| 0 | 0 | 1 | 0 |
| 0 | 0 | 0 | 0 |
| 0 | 0 | 1 | 0 |
| 0 | 1 | 0 | 0 |
| 0 | 0 | 0 | 0 |
| 0 | 0 | 0 | 0 |
| 0 | 0 | 0 | 0 |
| 0 | 0 | 0 | 0 |
| 0 | 0 | 0 | 0 |
| 0 | 0 | 0 | 0 |
| 0 | 0 | 0 | 0 |
| 0 | 0 | 0 | 0 |
| 0 | 0 | 0 | 0 |
| 0 | 0 | 0 | 0 |
| 0 | 1 | 0 | 0 |
| 0 | 1 | 0 | 0 |
| 0 | 1 | 1 | 0 |

|   |   |   |   |    |   |   |   |   |
|---|---|---|---|----|---|---|---|---|
| 0 | 1 | 0 | 0 | 2  | 0 | 0 | 4 | 0 |
| 0 | 1 | 0 | 4 | 9  | 0 | 2 | 0 | 0 |
| 0 | 0 | 0 | 0 | 15 | 0 | 0 | 1 | 0 |
| 0 | 1 | 0 | 0 | 11 | 0 | 6 | 1 | 0 |
| 0 | 0 | 0 | 1 | 3  | 0 | 0 | 0 | 0 |
| 0 | 2 | 0 | 0 | 2  | 0 | 1 | 0 | 0 |
| 0 | 1 | 0 | 0 | 1  | 0 | 1 | 0 | 0 |
| 0 | 2 | 0 | 0 | 0  | 0 | 0 | 0 | 0 |
| 0 | 1 | 0 | 0 | 6  | 0 | 0 | 0 | 0 |
| 0 | 2 | 0 | 0 | 0  | 0 | 0 | 0 | 0 |
| 0 | 0 | 0 | 0 | 5  | 0 | 0 | 0 | 0 |
| 0 | 2 | 0 | 0 | 2  | 0 | 0 | 0 | 0 |
| 0 | 4 | 0 | 0 | 0  | 0 | 0 | 0 | 0 |
| 0 | 1 | 1 | 0 | 0  | 0 | 0 | 0 | 0 |
| 0 | 0 | 0 | 0 | 3  | 0 | 0 | 2 | 0 |
| 0 | 0 | 0 | 0 | 2  | 0 | 0 | 1 | 0 |
| 0 | 1 | 0 | 0 | 0  | 0 | 0 | 0 | 0 |
| 0 | 0 | 0 | 0 | 2  | 0 | 0 | 0 | 0 |
| 0 | 0 | 0 | 0 | 5  | 0 | 1 | 0 | 0 |
| 0 | 0 | 0 | 0 | 5  | 0 | 0 | 2 | 0 |
| 0 | 1 | 0 | 0 | 16 | 0 | 7 | 0 | 0 |
| 0 | 2 | 0 | 0 | 6  | 0 | 0 | 2 | 0 |
| 0 | 0 | 0 | 0 | 2  | 0 | 5 | 0 | 0 |
| 0 | 2 | 0 | 0 | 2  | 0 | 0 | 1 | 0 |
| 0 | 0 | 0 | 0 | 5  | 0 | 0 | 0 | 0 |
| 0 | 0 | 0 | 0 | 10 | 0 | 2 | 0 | 0 |
| 0 | 0 | 0 | 0 | 5  | 0 | 0 | 1 | 0 |
| 0 | 6 | 0 | 0 | 5  | 0 | 0 | 0 | 0 |
| 0 | 1 | 0 | 0 | 11 | 0 | 0 | 0 | 0 |



|   |   |   |   |   |    |   |   |   |   |   |
|---|---|---|---|---|----|---|---|---|---|---|
| 1 | 1 | 0 | 0 | 0 | 6  | 0 | 0 | 3 | 0 | 0 |
| 0 | 4 | 0 | 0 | 0 | 3  | 0 | 0 | 0 | 0 | 0 |
| 0 | 0 | 0 | 0 | 0 | 2  | 0 | 0 | 7 | 0 | 0 |
| 0 | 0 | 0 | 0 | 1 | 14 | 0 | 0 | 2 | 1 | 0 |
| 0 | 0 | 0 | 0 | 0 | 19 | 0 | 0 | 2 | 0 | 0 |
| 0 | 2 | 0 | 0 | 0 | 8  | 0 | 0 | 1 | 0 | 0 |
| 0 | 0 | 0 | 0 | 2 | 6  | 0 | 0 | 4 | 0 | 0 |
| 0 | 3 | 0 | 0 | 0 | 17 | 0 | 0 | 1 | 1 | 0 |
| 0 | 0 | 0 | 0 | 0 | 0  | 0 | 0 | 1 | 0 | 0 |
| 0 | 2 | 0 | 0 | 0 | 6  | 0 | 0 | 0 | 0 | 0 |
| 0 | 0 | 0 | 0 | 0 | 0  | 0 | 0 | 0 | 0 | 0 |
| 0 | 1 | 0 | 0 | 0 | 6  | 0 | 0 | 0 | 0 | 0 |
| 0 | 0 | 0 | 0 | 0 | 3  | 0 | 0 | 1 | 0 | 0 |
| 0 | 1 | 0 | 0 | 0 | 9  | 0 | 0 | 0 | 0 | 0 |
| 0 | 2 | 0 | 0 | 0 | 1  | 0 | 0 | 0 | 0 | 0 |
| 0 | 3 | 0 | 0 | 0 | 0  | 0 | 0 | 0 | 1 | 0 |
| 0 | 4 | 0 | 0 | 0 | 3  | 0 | 0 | 0 | 0 | 0 |
| 0 | 2 | 0 | 0 | 0 | 7  | 0 | 0 | 0 | 0 | 0 |
| 0 | 4 | 0 | 0 | 0 | 15 | 0 | 0 | 0 | 0 | 0 |
| 0 | 4 | 0 | 0 | 0 | 4  | 0 | 0 | 1 | 0 | 0 |
| 0 | 1 | 0 | 0 | 0 | 16 | 0 | 0 | 1 | 0 | 0 |
| 0 | 2 | 0 | 0 | 0 | 1  | 0 | 0 | 0 | 0 | 0 |
| 0 | 0 | 0 | 0 | 0 | 7  | 0 | 0 | 0 | 0 | 0 |
| 0 | 1 | 0 | 0 | 0 | 14 | 0 | 0 | 0 | 0 | 0 |
| 0 | 3 | 0 | 0 | 0 | 8  | 0 | 0 | 0 | 1 | 0 |
| 0 | 7 | 0 | 0 | 0 | 2  | 0 | 0 | 0 | 0 | 0 |
| 0 | 3 | 0 | 0 | 0 | 5  | 0 | 0 | 0 | 0 | 0 |
| 0 | 5 | 0 | 0 | 0 | 7  | 0 | 0 | 0 | 0 | 0 |
| 0 | 3 | 0 | 0 | 0 | 8  | 0 | 0 | 2 | 0 | 0 |

|   |    |   |
|---|----|---|
| 0 | 4  | 0 |
| 0 | 1  | 0 |
| 0 | 5  | 0 |
| 0 | 0  | 0 |
| 2 | 0  | 0 |
| 0 | 4  | 0 |
| 0 | 1  | 0 |
| 0 | 1  | 0 |
| 0 | 1  | 0 |
| 0 | 11 | 0 |
| 1 | 4  | 0 |
| 0 | 3  | 0 |
| 0 | 3  | 0 |
| 0 | 4  | 0 |
| 0 | 4  | 0 |
| 0 | 11 | 0 |
| 0 | 3  | 0 |
| 0 | 7  | 1 |
| 0 | 6  | 0 |
| 0 | 6  | 0 |
| 0 | 3  | 0 |
| 0 | 9  | 0 |
| 2 | 18 | 0 |
| 0 | 5  | 0 |
| 0 | 1  | 0 |
| 0 | 14 | 0 |
| 0 | 19 | 1 |
| 0 | 7  | 0 |
| 3 | 5  | 2 |

|   |   |    |
|---|---|----|
| 0 | 0 | 10 |
| 0 | 0 | 3  |
| 0 | 0 | 0  |
| 0 | 0 | 1  |
| 0 | 0 | 7  |
| 0 | 0 | 3  |
| 0 | 0 | 6  |
| 0 | 0 | 4  |
| 0 | 0 | 5  |
| 0 | 1 | 5  |
| 0 | 0 | 1  |
| 0 | 2 | 0  |
| 0 | 0 | 0  |
| 0 | 1 | 2  |
| 0 | 0 | 0  |
| 0 | 0 | 0  |
| 0 | 0 | 9  |
| 0 | 0 | 4  |
| 0 | 0 | 4  |
| 0 | 0 | 0  |
| 0 | 0 | 0  |
| 0 | 0 | 1  |
| 0 | 1 | 6  |
| 0 | 1 | 2  |
| 0 | 0 | 0  |
| 0 | 0 | 1  |
| 0 | 0 | 3  |
| 0 | 0 | 7  |
| 0 | 0 | 10 |

|   |   |   |   |   |
|---|---|---|---|---|
| 0 | 0 | 0 | 0 | 0 |
| 0 | 0 | 1 | 1 | 0 |
| 0 | 0 | 0 | 0 | 0 |
| 0 | 0 | 0 | 1 | 0 |
| 0 | 0 | 0 | 3 | 0 |
| 0 | 0 | 4 | 1 | 0 |
| 0 | 0 | 0 | 1 | 0 |
| 0 | 0 | 0 | 1 | 1 |
| 0 | 0 | 0 | 0 | 0 |
| 0 | 0 | 0 | 0 | 0 |
| 0 | 0 | 1 | 0 | 0 |
| 0 | 0 | 0 | 0 | 0 |
| 0 | 0 | 0 | 1 | 0 |
| 0 | 0 | 1 | 0 | 0 |
| 0 | 0 | 1 | 2 | 0 |
| 0 | 0 | 0 | 0 | 0 |
| 0 | 0 | 0 | 0 | 0 |
| 0 | 0 | 0 | 0 | 0 |
| 0 | 2 | 0 | 0 | 0 |
| 0 | 1 | 0 | 0 | 0 |
| 0 | 0 | 0 | 1 | 0 |
| 0 | 0 | 0 | 0 | 0 |
| 0 | 0 | 0 | 0 | 0 |
| 0 | 0 | 0 | 0 | 0 |
| 0 | 0 | 0 | 0 | 0 |
| 0 | 2 | 0 | 0 | 0 |
| 0 | 0 | 0 | 1 | 0 |
| 0 | 0 | 0 | 0 | 0 |
| 0 | 0 | 1 | 0 | 0 |

|   |    |   |   |   |    |    |   |   |   |   |
|---|----|---|---|---|----|----|---|---|---|---|
| 0 | 8  | 0 | 0 | 0 | 3  | 0  | 0 | 0 | 0 | 0 |
| 0 | 16 | 0 | 0 | 0 | 0  | 0  | 0 | 0 | 1 | 0 |
| 0 | 11 | 0 | 0 | 0 | 0  | 0  | 0 | 0 | 1 | 0 |
| 0 | 13 | 0 | 0 | 0 | 0  | 0  | 0 | 1 | 0 | 0 |
| 1 | 16 | 0 | 0 | 0 | 5  | 0  | 0 | 0 | 2 | 0 |
| 0 | 16 | 0 | 0 | 0 | 0  | 0  | 0 | 0 | 0 | 0 |
| 1 | 8  | 0 | 0 | 0 | 8  | 0  | 0 | 0 | 0 | 0 |
| 1 | 35 | 0 | 0 | 0 | 10 | 0  | 0 | 1 | 3 | 0 |
| 1 | 26 | 0 | 1 | 0 | 4  | 0  | 0 | 0 | 1 | 0 |
| 0 | 42 | 0 | 0 | 0 | 6  | 0  | 1 | 0 | 1 | 0 |
| 0 | 11 | 0 | 0 | 0 | 1  | 0  | 0 | 0 | 0 | 0 |
| 0 | 39 | 0 | 0 | 0 | 0  | 0  | 0 | 0 | 0 | 0 |
| 0 | 9  | 0 | 0 | 0 | 3  | 0  | 0 | 2 | 0 | 0 |
| 0 | 11 | 0 | 0 | 0 | 3  | 0  | 0 | 0 | 0 | 0 |
| 0 | 6  | 0 | 0 | 0 | 3  | 0  | 0 | 0 | 0 | 0 |
| 0 | 13 | 0 | 0 | 0 | 2  | 0  | 0 | 0 | 0 | 0 |
| 0 | 5  | 0 | 0 | 0 | 6  | 0  | 0 | 0 | 2 | 0 |
| 0 | 6  | 0 | 0 | 0 | 0  | 0  | 0 | 0 | 0 | 0 |
| 0 | 15 | 0 | 0 | 0 | 1  | 0  | 0 | 0 | 1 | 0 |
| 0 | 3  | 0 | 0 | 0 | 2  | 0  | 2 | 1 | 0 | 0 |
| 0 | 10 | 0 | 0 | 0 | 1  | 3  | 0 | 0 | 0 | 0 |
| 0 | 2  | 0 | 0 | 0 | 2  | 0  | 0 | 0 | 1 | 0 |
| 0 | 5  | 0 | 0 | 0 | 0  | 0  | 0 | 0 | 0 | 0 |
| 0 | 3  | 0 | 0 | 0 | 0  | 15 | 0 | 0 | 0 | 0 |
| 0 | 8  | 0 | 0 | 0 | 1  | 0  | 0 | 0 | 1 | 0 |
| 0 | 8  | 0 | 0 | 0 | 0  | 4  | 0 | 0 | 0 | 0 |
| 0 | 8  | 0 | 0 | 0 | 0  | 6  | 0 | 0 | 0 | 0 |
| 0 | 7  | 0 | 0 | 0 | 0  | 9  | 0 | 0 | 0 | 0 |
| 0 | 2  | 0 | 0 | 0 | 0  | 3  | 0 | 0 | 0 | 0 |



|   |   |   |   |   |    |   |   |   |   |   |
|---|---|---|---|---|----|---|---|---|---|---|
| 0 | 2 | 0 | 0 | 0 | 2  | 0 | 0 | 7 | 0 | 0 |
| 0 | 3 | 0 | 0 | 0 | 0  | 0 | 0 | 1 | 0 | 0 |
| 0 | 2 | 0 | 0 | 0 | 0  | 0 | 0 | 0 | 0 | 0 |
| 0 | 1 | 0 | 0 | 0 | 12 | 0 | 0 | 3 | 0 | 0 |
| 0 | 1 | 0 | 0 | 0 | 4  | 0 | 0 | 0 | 0 | 0 |
| 0 | 1 | 0 | 0 | 0 | 2  | 0 | 0 | 0 | 0 | 0 |
| 0 | 0 | 0 | 0 | 0 | 3  | 0 | 0 | 0 | 0 | 0 |
| 0 | 0 | 0 | 0 | 0 | 4  | 0 | 0 | 2 | 0 | 0 |
| 0 | 4 | 0 | 0 | 0 | 13 | 0 | 0 | 0 | 0 | 0 |
| 0 | 4 | 0 | 0 | 0 | 4  | 0 | 0 | 4 | 1 | 0 |
| 0 | 2 | 0 | 0 | 0 | 2  | 0 | 0 | 0 | 0 | 0 |
| 0 | 2 | 0 | 0 | 0 | 4  | 0 | 0 | 0 | 3 | 0 |
| 0 | 4 | 0 | 0 | 0 | 7  | 0 | 0 | 0 | 0 | 0 |
| 0 | 2 | 1 | 0 | 0 | 4  | 0 | 0 | 0 | 1 | 0 |
| 0 | 0 | 0 | 0 | 0 | 1  | 0 | 0 | 0 | 0 | 0 |
| 0 | 4 | 0 | 0 | 0 | 5  | 0 | 0 | 0 | 1 | 0 |
| 0 | 6 | 0 | 0 | 0 | 0  | 0 | 0 | 0 | 0 | 0 |
| 0 | 1 | 0 | 0 | 1 | 4  | 0 | 0 | 0 | 0 | 0 |
| 0 | 1 | 1 | 0 | 0 | 8  | 0 | 0 | 1 | 0 | 0 |
| 0 | 1 | 0 | 0 | 0 | 4  | 0 | 0 | 0 | 2 | 0 |
| 0 | 3 | 0 | 0 | 0 | 2  | 0 | 0 | 0 | 0 | 0 |
| 0 | 0 | 0 | 0 | 0 | 0  | 0 | 0 | 0 | 0 | 0 |
| 0 | 0 | 0 | 0 | 0 | 4  | 0 | 0 | 3 | 1 | 0 |
| 0 | 2 | 0 | 0 | 0 | 7  | 0 | 0 | 3 | 1 | 0 |
| 0 | 0 | 0 | 0 | 0 | 1  | 0 | 0 | 2 | 0 | 0 |
| 0 | 1 | 1 | 0 | 0 | 3  | 0 | 0 | 0 | 0 | 0 |
| 0 | 3 | 1 | 0 | 1 | 8  | 0 | 0 | 0 | 0 | 0 |
| 0 | 2 | 0 | 0 | 0 | 0  | 0 | 0 | 0 | 0 | 0 |
| 0 | 1 | 0 | 0 | 0 | 2  | 0 | 0 | 0 | 2 | 0 |

|   |   |   |
|---|---|---|
| 0 | 2 | 4 |
| 0 | 0 | 1 |
| 0 | 0 | 6 |
| 0 | 1 | 3 |
| 0 | 0 | 1 |
| 0 | 0 | 0 |
| 0 | 2 | 0 |
| 0 | 0 | 1 |
| 0 | 0 | 0 |
| 0 | 0 | 0 |
| 0 | 0 | 0 |
| 0 | 1 | 0 |
| 0 | 0 | 0 |
| 0 | 0 | 0 |

|   |   |    |
|---|---|----|
| 0 | 0 | 6  |
| 0 | 0 | 0  |
| 0 | 0 | 1  |
| 0 | 0 | 16 |
| 0 | 0 | 0  |
| 0 | 0 | 6  |
| 0 | 0 | 12 |
| 0 | 0 | 7  |
| 0 | 0 | 1  |
| 0 | 1 | 3  |
| 0 | 0 | 5  |
| 0 | 1 | 9  |
| 0 | 0 | 9  |
| 0 | 0 | 2  |

|   |   |   |   |   |
|---|---|---|---|---|
| 0 | 0 | 3 | 0 | 0 |
| 0 | 0 | 0 | 0 | 0 |
| 0 | 0 | 0 | 0 | 0 |
| 0 | 0 | 4 | 1 | 0 |
| 0 | 0 | 0 | 2 | 0 |
| 0 | 0 | 0 | 1 | 0 |
| 0 | 0 | 2 | 1 | 0 |
| 0 | 0 | 6 | 0 | 0 |
| 0 | 0 | 0 | 0 | 0 |
| 0 | 0 | 1 | 0 | 0 |
| 0 | 0 | 0 | 0 | 0 |
| 0 | 0 | 0 | 0 | 0 |
| 0 | 0 | 0 | 0 | 0 |
| 0 | 0 | 0 | 0 | 0 |
| 0 | 0 | 0 | 1 | 0 |

| chaeto | chigla | cirrat | collem | comads | comgla | coroph | coscon | cragig | cycova | cyctho |   |
|--------|--------|--------|--------|--------|--------|--------|--------|--------|--------|--------|---|
| 0      | 0      | 0      | 0      | 1      | 0      | 0      | 0      | 0      | 0      | 0      | 0 |
| 0      | 0      | 0      | 0      | 1      | 0      | 5      | 0      | 0      | 0      | 0      | 0 |
| 0      | 0      | 0      | 0      | 1      | 0      | 3      | 0      | 0      | 0      | 0      | 0 |
| 0      | 0      | 0      | 0      | 1      | 0      | 1      | 0      | 0      | 0      | 0      | 0 |
| 0      | 0      | 0      | 0      | 0      | 0      | 0      | 0      | 0      | 0      | 0      | 0 |
| 0      | 0      | 0      | 0      | 0      | 0      | 1      | 0      | 0      | 0      | 0      | 0 |
| 0      | 0      | 0      | 0      | 1      | 0      | 0      | 0      | 0      | 0      | 0      | 0 |
| 0      | 0      | 0      | 0      | 0      | 0      | 0      | 0      | 0      | 0      | 0      | 0 |
| 0      | 0      | 0      | 1      | 0      | 0      | 1      | 0      | 0      | 0      | 0      | 0 |
| 0      | 0      | 0      | 0      | 1      | 0      | 0      | 0      | 0      | 0      | 0      | 0 |
| 0      | 0      | 0      | 0      | 0      | 0      | 1      | 0      | 0      | 0      | 2      | 0 |
| 0      | 0      | 0      | 0      | 0      | 0      | 0      | 0      | 0      | 0      | 0      | 0 |
| 0      | 0      | 0      | 0      | 0      | 0      | 0      | 0      | 0      | 0      | 0      | 0 |
| 0      | 0      | 0      | 0      | 0      | 0      | 0      | 0      | 0      | 0      | 0      | 0 |
| 0      | 0      | 0      | 0      | 0      | 0      | 0      | 0      | 0      | 0      | 0      | 0 |
| 0      | 0      | 0      | 0      | 3      | 0      | 0      | 0      | 0      | 0      | 0      | 0 |
| 0      | 0      | 0      | 0      | 0      | 0      | 0      | 0      | 0      | 0      | 0      | 0 |
| 0      | 0      | 0      | 0      | 0      | 0      | 0      | 0      | 0      | 0      | 0      | 0 |
| 0      | 0      | 0      | 0      | 0      | 0      | 0      | 0      | 0      | 0      | 0      | 0 |
| 0      | 0      | 0      | 0      | 0      | 0      | 0      | 0      | 0      | 0      | 0      | 0 |
| 0      | 0      | 0      | 0      | 0      | 0      | 0      | 0      | 0      | 0      | 0      | 0 |
| 0      | 0      | 0      | 0      | 0      | 0      | 0      | 0      | 0      | 0      | 0      | 0 |
| 0      | 0      | 0      | 0      | 1      | 0      | 0      | 0      | 0      | 0      | 0      | 0 |
| 0      | 0      | 0      | 0      | 0      | 0      | 0      | 0      | 0      | 0      | 0      | 0 |
| 0      | 0      | 0      | 0      | 0      | 0      | 0      | 0      | 0      | 0      | 0      | 0 |
| 0      | 0      | 0      | 0      | 0      | 0      | 0      | 0      | 0      | 0      | 0      | 0 |
| 0      | 0      | 0      | 0      | 0      | 0      | 0      | 0      | 0      | 0      | 0      | 0 |
| 0      | 0      | 0      | 0      | 0      | 0      | 0      | 0      | 0      | 0      | 0      | 0 |
| 0      | 0      | 0      | 0      | 0      | 0      | 0      | 0      | 0      | 0      | 0      | 0 |
| 0      | 0      | 0      | 0      | 0      | 0      | 0      | 0      | 0      | 0      | 0      | 0 |
| 0      | 0      | 0      | 0      | 0      | 0      | 0      | 0      | 0      | 0      | 0      | 0 |
| 0      | 0      | 0      | 0      | 0      | 0      | 0      | 0      | 0      | 0      | 0      | 0 |
| 0      | 0      | 0      | 0      | 1      | 0      | 0      | 0      | 0      | 0      | 0      | 0 |







|   |   |   |   |   |   |   |   |   |   |   |
|---|---|---|---|---|---|---|---|---|---|---|
| 0 | 0 | 0 | 0 | 0 | 0 | 0 | 0 | 0 | 1 | 0 |
| 0 | 0 | 0 | 0 | 0 | 0 | 0 | 0 | 0 | 0 | 0 |
| 0 | 0 | 0 | 0 | 0 | 1 | 0 | 0 | 0 | 0 | 0 |
| 0 | 0 | 0 | 0 | 0 | 0 | 0 | 0 | 0 | 0 | 0 |
| 0 | 0 | 0 | 0 | 0 | 0 | 0 | 0 | 0 | 0 | 0 |
| 0 | 0 | 0 | 0 | 0 | 0 | 0 | 0 | 0 | 0 | 0 |
| 0 | 0 | 0 | 0 | 0 | 1 | 0 | 0 | 0 | 0 | 0 |
| 0 | 0 | 0 | 0 | 0 | 1 | 0 | 0 | 0 | 0 | 0 |
| 0 | 0 | 0 | 1 | 0 | 0 | 0 | 0 | 0 | 0 | 0 |
| 0 | 0 | 0 | 0 | 0 | 0 | 0 | 0 | 0 | 0 | 0 |
| 0 | 0 | 0 | 0 | 0 | 0 | 0 | 0 | 0 | 0 | 0 |
| 0 | 0 | 0 | 0 | 0 | 0 | 0 | 0 | 0 | 0 | 0 |
| 0 | 0 | 0 | 0 | 0 | 0 | 0 | 0 | 0 | 0 | 0 |
| 0 | 0 | 0 | 1 | 0 | 0 | 0 | 0 | 0 | 0 | 0 |
| 0 | 0 | 0 | 0 | 0 | 0 | 0 | 0 | 0 | 0 | 0 |
| 0 | 0 | 0 | 3 | 0 | 0 | 0 | 0 | 0 | 0 | 0 |
| 0 | 0 | 0 | 0 | 0 | 0 | 0 | 0 | 0 | 0 | 0 |
| 0 | 0 | 0 | 0 | 0 | 0 | 1 | 0 | 0 | 0 | 0 |
| 0 | 0 | 0 | 0 | 0 | 0 | 0 | 0 | 0 | 0 | 0 |
| 0 | 0 | 0 | 0 | 0 | 0 | 0 | 0 | 0 | 0 | 0 |
| 0 | 0 | 0 | 1 | 0 | 0 | 0 | 0 | 0 | 1 | 0 |
| 0 | 0 | 0 | 0 | 0 | 1 | 0 | 0 | 0 | 2 | 0 |
| 0 | 0 | 0 | 0 | 0 | 0 | 0 | 0 | 0 | 0 | 0 |
| 0 | 0 | 0 | 0 | 0 | 0 | 0 | 0 | 0 | 2 | 0 |
| 0 | 0 | 0 | 0 | 0 | 1 | 3 | 0 | 0 | 0 | 0 |
| 0 | 0 | 0 | 1 | 0 | 1 | 0 | 0 | 0 | 0 | 0 |
| 0 | 0 | 0 | 0 | 0 | 0 | 0 | 0 | 0 | 2 | 0 |
| 0 | 0 | 0 | 0 | 0 | 1 | 0 | 0 | 0 | 0 | 1 |

|   |   |   |   |   |    |   |   |   |   |   |
|---|---|---|---|---|----|---|---|---|---|---|
| 0 | 0 | 0 | 1 | 0 | 0  | 0 | 0 | 0 | 1 | 0 |
| 0 | 0 | 0 | 1 | 0 | 3  | 0 | 0 | 0 | 0 | 0 |
| 0 | 0 | 0 | 0 | 0 | 1  | 0 | 0 | 0 | 0 | 0 |
| 0 | 0 | 0 | 1 | 0 | 0  | 0 | 0 | 0 | 0 | 0 |
| 0 | 0 | 0 | 3 | 0 | 0  | 0 | 0 | 0 | 0 | 0 |
| 0 | 0 | 0 | 0 | 0 | 0  | 0 | 0 | 0 | 0 | 0 |
| 0 | 0 | 0 | 1 | 0 | 0  | 0 | 0 | 0 | 0 | 0 |
| 0 | 0 | 0 | 0 | 0 | 1  | 0 | 0 | 0 | 0 | 0 |
| 0 | 0 | 0 | 2 | 0 | 0  | 0 | 0 | 0 | 0 | 0 |
| 0 | 0 | 0 | 1 | 0 | 0  | 0 | 0 | 0 | 0 | 0 |
| 0 | 0 | 0 | 0 | 0 | 0  | 0 | 0 | 0 | 0 | 0 |
| 0 | 0 | 0 | 0 | 0 | 0  | 0 | 0 | 0 | 0 | 0 |
| 0 | 0 | 0 | 0 | 0 | 0  | 0 | 0 | 0 | 0 | 0 |
| 0 | 0 | 0 | 0 | 0 | 0  | 0 | 0 | 0 | 0 | 0 |
| 0 | 0 | 0 | 0 | 0 | 10 | 0 | 0 | 0 | 0 | 0 |
| 0 | 0 | 0 | 0 | 0 | 0  | 0 | 0 | 0 | 0 | 0 |
| 0 | 0 | 0 | 0 | 0 | 0  | 0 | 0 | 0 | 0 | 0 |
| 0 | 0 | 0 | 0 | 0 | 0  | 0 | 0 | 0 | 0 | 0 |
| 0 | 0 | 0 | 0 | 0 | 0  | 0 | 0 | 0 | 0 | 0 |
| 0 | 0 | 0 | 0 | 0 | 0  | 0 | 0 | 0 | 0 | 0 |
| 0 | 0 | 0 | 1 | 0 | 1  | 0 | 0 | 0 | 0 | 0 |
| 0 | 0 | 0 | 1 | 0 | 0  | 0 | 0 | 0 | 0 | 0 |
| 0 | 0 | 0 | 1 | 0 | 0  | 0 | 0 | 0 | 0 | 0 |
| 0 | 0 | 0 | 0 | 0 | 1  | 0 | 0 | 0 | 0 | 0 |
| 0 | 0 | 0 | 0 | 0 | 1  | 0 | 0 | 0 | 0 | 0 |
| 0 | 0 | 0 | 3 | 0 | 1  | 0 | 0 | 0 | 0 | 0 |
| 0 | 0 | 0 | 0 | 0 | 0  | 0 | 0 | 0 | 0 | 0 |
| 0 | 0 | 0 | 0 | 0 | 1  | 0 | 0 | 0 | 0 | 0 |
| 0 | 0 | 0 | 0 | 0 | 0  | 0 | 0 | 0 | 0 | 0 |
| 0 | 0 | 0 | 0 | 0 | 3  | 0 | 0 | 0 | 0 | 1 |

|   |   |   |   |   |   |   |   |   |   |   |
|---|---|---|---|---|---|---|---|---|---|---|
| 0 | 0 | 0 | 0 | 0 | 0 | 0 | 0 | 0 | 0 | 0 |
| 0 | 0 | 0 | 0 | 0 | 2 | 0 | 0 | 0 | 0 | 0 |
| 0 | 0 | 0 | 0 | 0 | 0 | 0 | 0 | 0 | 0 | 0 |
| 0 | 0 | 0 | 1 | 0 | 1 | 0 | 0 | 0 | 0 | 0 |
| 0 | 0 | 0 | 0 | 0 | 0 | 0 | 0 | 0 | 0 | 0 |
| 0 | 0 | 0 | 2 | 0 | 0 | 0 | 0 | 0 | 0 | 0 |
| 0 | 0 | 0 | 5 | 0 | 0 | 0 | 0 | 0 | 0 | 0 |
| 0 | 0 | 0 | 0 | 0 | 1 | 0 | 0 | 0 | 0 | 0 |
| 0 | 0 | 0 | 0 | 0 | 0 | 0 | 0 | 0 | 0 | 0 |
| 0 | 0 | 0 | 0 | 0 | 0 | 0 | 0 | 0 | 0 | 0 |
| 0 | 0 | 0 | 0 | 0 | 0 | 0 | 0 | 0 | 0 | 0 |
| 0 | 0 | 0 | 2 | 0 | 0 | 0 | 0 | 0 | 0 | 0 |
| 0 | 0 | 0 | 2 | 0 | 0 | 0 | 0 | 0 | 0 | 0 |
| 0 | 0 | 0 | 0 | 0 | 0 | 0 | 0 | 0 | 0 | 0 |
| 0 | 0 | 0 | 0 | 0 | 2 | 0 | 0 | 0 | 0 | 0 |
| 0 | 0 | 0 | 0 | 0 | 0 | 0 | 0 | 0 | 0 | 0 |
| 0 | 0 | 0 | 0 | 0 | 0 | 0 | 0 | 0 | 0 | 0 |
| 0 | 0 | 0 | 0 | 0 | 0 | 0 | 0 | 0 | 0 | 0 |
| 0 | 0 | 0 | 0 | 0 | 0 | 0 | 0 | 0 | 0 | 0 |
| 0 | 1 | 0 | 0 | 0 | 0 | 0 | 0 | 0 | 0 | 0 |
| 0 | 2 | 0 | 0 | 0 | 0 | 0 | 0 | 0 | 0 | 0 |
| 0 | 1 | 0 | 0 | 0 | 0 | 0 | 1 | 0 | 0 | 0 |
| 0 | 0 | 0 | 0 | 0 | 0 | 0 | 0 | 0 | 1 | 0 |
| 0 | 1 | 0 | 0 | 0 | 0 | 0 | 0 | 3 | 0 | 0 |
| 0 | 0 | 0 | 0 | 0 | 1 | 0 | 0 | 0 | 0 | 0 |
| 0 | 0 | 0 | 2 | 0 | 0 | 0 | 0 | 0 | 0 | 0 |
| 0 | 0 | 0 | 1 | 0 | 0 | 0 | 0 | 0 | 0 | 0 |
| 0 | 1 | 0 | 4 | 0 | 0 | 0 | 0 | 0 | 0 | 0 |
| 0 | 0 | 0 | 2 | 0 | 0 | 0 | 0 | 0 | 0 | 0 |
| 0 | 0 | 0 | 3 | 0 | 0 | 0 | 0 | 0 | 0 | 0 |

|   |   |   |   |   |   |   |   |   |   |   |
|---|---|---|---|---|---|---|---|---|---|---|
| 0 | 0 | 0 | 0 | 0 | 0 | 0 | 0 | 0 | 0 | 0 |
| 0 | 0 | 0 | 1 | 0 | 0 | 0 | 0 | 0 | 0 | 0 |
| 0 | 0 | 0 | 2 | 0 | 0 | 0 | 0 | 0 | 0 | 0 |
| 0 | 0 | 0 | 1 | 0 | 0 | 0 | 0 | 0 | 0 | 0 |
| 0 | 0 | 0 | 0 | 0 | 0 | 0 | 0 | 0 | 0 | 0 |
| 0 | 0 | 0 | 1 | 0 | 0 | 0 | 0 | 0 | 0 | 0 |
| 0 | 0 | 0 | 1 | 0 | 0 | 0 | 0 | 0 | 0 | 0 |
| 0 | 0 | 0 | 1 | 0 | 0 | 0 | 0 | 0 | 0 | 0 |
| 0 | 0 | 0 | 1 | 0 | 0 | 0 | 0 | 0 | 0 | 0 |
| 0 | 0 | 0 | 0 | 0 | 0 | 0 | 0 | 0 | 0 | 0 |
| 0 | 0 | 0 | 0 | 0 | 0 | 0 | 0 | 0 | 0 | 0 |
| 0 | 0 | 0 | 0 | 0 | 0 | 0 | 0 | 0 | 0 | 0 |
| 0 | 0 | 0 | 0 | 0 | 0 | 0 | 0 | 0 | 0 | 0 |
| 0 | 0 | 0 | 0 | 0 | 0 | 0 | 0 | 0 | 0 | 0 |
| 0 | 0 | 0 | 1 | 0 | 0 | 0 | 0 | 0 | 0 | 0 |
| 0 | 0 | 0 | 1 | 0 | 0 | 0 | 0 | 0 | 0 | 0 |
| 0 | 0 | 0 | 0 | 0 | 1 | 0 | 0 | 0 | 0 | 0 |
| 0 | 0 | 0 | 0 | 0 | 1 | 0 | 0 | 0 | 0 | 0 |
| 0 | 0 | 0 | 0 | 0 | 0 | 0 | 0 | 0 | 0 | 0 |
| 0 | 0 | 0 | 0 | 0 | 0 | 0 | 0 | 0 | 0 | 0 |
| 0 | 0 | 0 | 2 | 0 | 0 | 0 | 0 | 0 | 0 | 0 |
| 0 | 0 | 0 | 0 | 0 | 0 | 0 | 0 | 0 | 0 | 0 |
| 0 | 0 | 0 | 1 | 0 | 0 | 0 | 0 | 0 | 0 | 0 |
| 0 | 0 | 0 | 2 | 0 | 0 | 0 | 0 | 0 | 0 | 0 |
| 0 | 0 | 0 | 3 | 0 | 0 | 0 | 0 | 0 | 0 | 0 |
| 0 | 0 | 0 | 0 | 0 | 1 | 0 | 0 | 0 | 0 | 0 |
| 0 | 0 | 0 | 0 | 0 | 0 | 0 | 0 | 0 | 0 | 0 |
| 0 | 0 | 0 | 2 | 0 | 0 | 0 | 0 | 0 | 0 | 0 |
| 0 | 0 | 0 | 3 | 0 | 0 | 0 | 0 | 0 | 0 | 0 |

|   |   |   |    |   |   |   |   |   |   |   |
|---|---|---|----|---|---|---|---|---|---|---|
| 0 | 0 | 0 | 1  | 0 | 0 | 0 | 0 | 0 | 0 | 0 |
| 0 | 0 | 0 | 1  | 0 | 0 | 6 | 0 | 0 | 0 | 0 |
| 0 | 0 | 0 | 2  | 0 | 0 | 0 | 0 | 0 | 0 | 0 |
| 0 | 0 | 0 | 6  | 0 | 0 | 0 | 0 | 0 | 0 | 0 |
| 0 | 0 | 0 | 1  | 0 | 0 | 0 | 0 | 0 | 0 | 0 |
| 0 | 0 | 0 | 2  | 0 | 1 | 0 | 0 | 0 | 0 | 0 |
| 0 | 0 | 0 | 7  | 0 | 0 | 0 | 0 | 0 | 0 | 0 |
| 0 | 0 | 0 | 2  | 0 | 0 | 0 | 0 | 0 | 0 | 0 |
| 0 | 0 | 0 | 3  | 0 | 1 | 0 | 0 | 0 | 0 | 0 |
| 0 | 0 | 0 | 4  | 0 | 0 | 0 | 0 | 0 | 0 | 0 |
| 0 | 0 | 0 | 5  | 0 | 1 | 0 | 0 | 0 | 0 | 0 |
| 0 | 0 | 0 | 2  | 0 | 0 | 0 | 0 | 0 | 0 | 0 |
| 0 | 0 | 0 | 0  | 0 | 1 | 0 | 0 | 0 | 0 | 0 |
| 0 | 0 | 0 | 6  | 0 | 0 | 0 | 0 | 0 | 0 | 0 |
| 0 | 0 | 0 | 3  | 0 | 0 | 0 | 0 | 0 | 0 | 0 |
| 0 | 0 | 0 | 3  | 0 | 0 | 0 | 0 | 0 | 0 | 0 |
| 0 | 0 | 0 | 7  | 0 | 0 | 0 | 0 | 0 | 0 | 0 |
| 0 | 0 | 0 | 8  | 0 | 1 | 0 | 0 | 0 | 0 | 0 |
| 0 | 0 | 0 | 1  | 0 | 1 | 0 | 0 | 0 | 0 | 0 |
| 0 | 0 | 0 | 0  | 0 | 0 | 0 | 0 | 0 | 0 | 0 |
| 0 | 0 | 0 | 2  | 0 | 0 | 0 | 0 | 0 | 0 | 0 |
| 0 | 0 | 0 | 1  | 0 | 0 | 0 | 0 | 0 | 0 | 0 |
| 0 | 0 | 0 | 10 | 0 | 0 | 0 | 0 | 0 | 0 | 0 |
| 0 | 0 | 0 | 7  | 0 | 0 | 0 | 0 | 0 | 0 | 0 |
| 0 | 0 | 0 | 6  | 0 | 1 | 0 | 0 | 0 | 0 | 0 |
| 0 | 0 | 0 | 5  | 0 | 0 | 0 | 0 | 0 | 0 | 0 |
| 0 | 0 | 0 | 0  | 0 | 0 | 0 | 0 | 0 | 0 | 0 |
| 0 | 0 | 0 | 2  | 0 | 0 | 0 | 0 | 0 | 0 | 0 |
| 0 | 0 | 0 | 1  | 0 | 0 | 0 | 0 | 0 | 0 | 0 |



|   |   |   |   |   |   |   |   |   |   |   |
|---|---|---|---|---|---|---|---|---|---|---|
| 0 | 0 | 0 | 0 | 0 | 0 | 0 | 0 | 0 | 0 | 0 |
| 0 | 0 | 0 | 1 | 0 | 0 | 0 | 0 | 0 | 0 | 0 |
| 0 | 0 | 0 | 1 | 0 | 3 | 0 | 0 | 0 | 0 | 0 |
| 0 | 0 | 0 | 5 | 0 | 0 | 0 | 0 | 0 | 1 | 0 |
| 0 | 0 | 0 | 0 | 0 | 0 | 0 | 0 | 0 | 0 | 0 |
| 0 | 0 | 0 | 1 | 0 | 0 | 0 | 0 | 0 | 0 | 0 |
| 0 | 0 | 0 | 0 | 0 | 0 | 0 | 0 | 0 | 0 | 0 |
| 0 | 0 | 0 | 2 | 1 | 1 | 0 | 0 | 0 | 0 | 1 |
| 0 | 0 | 0 | 3 | 0 | 1 | 0 | 0 | 0 | 1 | 1 |
| 0 | 0 | 0 | 6 | 0 | 0 | 0 | 0 | 0 | 0 | 1 |
| 0 | 0 | 0 | 0 | 0 | 0 | 0 | 0 | 0 | 1 | 0 |
| 0 | 0 | 0 | 2 | 0 | 0 | 0 | 0 | 0 | 0 | 0 |
| 0 | 0 | 0 | 0 | 0 | 0 | 0 | 0 | 0 | 0 | 0 |
| 0 | 0 | 0 | 3 | 0 | 0 | 0 | 0 | 0 | 0 | 0 |
| 0 | 0 | 0 | 4 | 0 | 0 | 0 | 0 | 0 | 0 | 0 |
| 0 | 0 | 0 | 0 | 0 | 0 | 0 | 0 | 0 | 0 | 1 |
| 0 | 0 | 0 | 1 | 0 | 0 | 0 | 0 | 0 | 0 | 0 |
| 0 | 0 | 0 | 1 | 0 | 1 | 0 | 0 | 0 | 0 | 0 |
| 0 | 0 | 0 | 0 | 0 | 0 | 0 | 0 | 0 | 0 | 0 |
| 0 | 0 | 0 | 0 | 0 | 0 | 0 | 0 | 0 | 0 | 0 |
| 0 | 0 | 0 | 1 | 0 | 0 | 0 | 0 | 0 | 0 | 0 |
| 0 | 0 | 0 | 1 | 0 | 2 | 0 | 0 | 0 | 0 | 0 |
| 0 | 0 | 0 | 0 | 0 | 0 | 0 | 0 | 0 | 0 | 0 |
| 0 | 0 | 0 | 2 | 0 | 0 | 0 | 0 | 0 | 0 | 0 |
| 0 | 0 | 0 | 3 | 0 | 0 | 0 | 0 | 0 | 0 | 0 |
| 0 | 0 | 0 | 1 | 0 | 1 | 0 | 0 | 0 | 0 | 0 |
| 0 | 0 | 0 | 2 | 0 | 0 | 0 | 0 | 0 | 0 | 0 |
| 0 | 0 | 0 | 1 | 0 | 0 | 0 | 0 | 0 | 0 | 0 |
| 0 | 0 | 0 | 4 | 0 | 0 | 0 | 0 | 0 | 0 | 0 |



|   |   |   |   |   |   |   |   |   |   |    |
|---|---|---|---|---|---|---|---|---|---|----|
| 0 | 0 | 0 | 3 | 0 | 0 | 0 | 0 | 0 | 0 | 0  |
| 0 | 0 | 0 | 7 | 0 | 0 | 0 | 0 | 0 | 0 | 0  |
| 0 | 0 | 0 | 1 | 0 | 0 | 0 | 0 | 0 | 1 | 0  |
| 0 | 0 | 0 | 2 | 0 | 0 | 0 | 0 | 0 | 0 | 1  |
| 0 | 0 | 0 | 4 | 0 | 0 | 2 | 0 | 0 | 0 | 1  |
| 0 | 0 | 0 | 3 | 0 | 0 | 0 | 0 | 0 | 0 | 0  |
| 0 | 0 | 0 | 4 | 0 | 0 | 0 | 0 | 0 | 0 | 0  |
| 0 | 0 | 0 | 6 | 0 | 0 | 0 | 0 | 0 | 0 | 0  |
| 0 | 0 | 0 | 0 | 0 | 0 | 0 | 0 | 0 | 0 | 0  |
| 0 | 0 | 0 | 0 | 0 | 0 | 0 | 0 | 0 | 0 | 0  |
| 0 | 0 | 0 | 3 | 0 | 0 | 0 | 0 | 0 | 0 | 0  |
| 0 | 0 | 0 | 6 | 0 | 1 | 0 | 0 | 0 | 3 | 3  |
| 0 | 0 | 0 | 7 | 0 | 0 | 0 | 0 | 0 | 0 | 0  |
| 0 | 0 | 0 | 3 | 0 | 0 | 1 | 0 | 0 | 0 | 2  |
| 0 | 0 | 0 | 2 | 0 | 0 | 0 | 0 | 0 | 2 | 13 |
| 0 | 0 | 0 | 5 | 0 | 0 | 0 | 0 | 0 | 0 | 1  |
| 0 | 0 | 0 | 1 | 0 | 0 | 0 | 0 | 0 | 0 | 0  |
| 0 | 0 | 0 | 4 | 1 | 0 | 0 | 0 | 0 | 0 | 0  |
| 0 | 0 | 0 | 2 | 0 | 0 | 0 | 0 | 0 | 0 | 1  |
| 0 | 0 | 0 | 2 | 0 | 0 | 0 | 0 | 0 | 0 | 0  |
| 0 | 0 | 0 | 1 | 0 | 0 | 0 | 0 | 0 | 0 | 0  |
| 0 | 0 | 0 | 4 | 0 | 0 | 0 | 0 | 0 | 0 | 0  |
| 0 | 0 | 0 | 1 | 0 | 0 | 0 | 0 | 0 | 0 | 0  |
| 0 | 0 | 0 | 3 | 0 | 0 | 0 | 0 | 0 | 1 | 1  |
| 0 | 0 | 0 | 1 | 0 | 0 | 0 | 0 | 0 | 0 | 0  |
| 0 | 0 | 0 | 0 | 0 | 0 | 0 | 0 | 0 | 0 | 0  |
| 0 | 0 | 0 | 2 | 0 | 0 | 0 | 0 | 0 | 0 | 0  |
| 0 | 0 | 1 | 3 | 0 | 0 | 0 | 0 | 0 | 1 | 0  |
| 0 | 0 | 0 | 4 | 0 | 0 | 0 | 0 | 0 | 0 | 0  |

|   |   |   |   |   |   |   |   |   |   |   |
|---|---|---|---|---|---|---|---|---|---|---|
| 0 | 0 | 0 | 3 | 0 | 0 | 0 | 0 | 0 | 0 | 0 |
| 0 | 0 | 0 | 3 | 0 | 0 | 0 | 0 | 0 | 0 | 0 |
| 0 | 0 | 0 | 1 | 0 | 0 | 0 | 0 | 0 | 1 | 0 |
| 0 | 0 | 0 | 3 | 0 | 0 | 0 | 0 | 0 | 0 | 0 |
| 0 | 0 | 0 | 0 | 0 | 0 | 0 | 4 | 0 | 0 | 0 |
| 0 | 0 | 0 | 0 | 1 | 0 | 0 | 0 | 0 | 0 | 0 |
| 0 | 0 | 0 | 5 | 0 | 0 | 0 | 0 | 0 | 0 | 0 |
| 0 | 0 | 0 | 4 | 0 | 0 | 0 | 0 | 0 | 0 | 0 |
| 0 | 0 | 0 | 7 | 0 | 0 | 0 | 0 | 0 | 0 | 0 |
| 0 | 0 | 0 | 0 | 0 | 0 | 0 | 0 | 0 | 0 | 0 |
| 0 | 0 | 0 | 0 | 0 | 0 | 0 | 0 | 0 | 0 | 0 |
| 0 | 0 | 1 | 3 | 0 | 0 | 0 | 0 | 0 | 0 | 0 |
| 0 | 0 | 0 | 0 | 0 | 0 | 0 | 0 | 0 | 0 | 0 |
| 0 | 0 | 0 | 1 | 0 | 0 | 0 | 0 | 0 | 0 | 0 |
| 0 | 0 | 0 | 1 | 0 | 0 | 0 | 0 | 0 | 0 | 0 |
| 0 | 0 | 0 | 4 | 0 | 0 | 0 | 0 | 0 | 1 | 0 |
| 0 | 0 | 0 | 0 | 0 | 1 | 0 | 0 | 0 | 0 | 0 |
| 0 | 0 | 0 | 0 | 0 | 1 | 0 | 0 | 0 | 0 | 0 |
| 0 | 0 | 0 | 0 | 0 | 0 | 0 | 0 | 0 | 0 | 0 |
| 0 | 0 | 0 | 5 | 0 | 0 | 0 | 0 | 0 | 0 | 0 |
| 0 | 0 | 0 | 2 | 0 | 1 | 0 | 0 | 0 | 0 | 0 |
| 0 | 0 | 0 | 0 | 0 | 0 | 0 | 0 | 0 | 0 | 0 |
| 0 | 0 | 0 | 1 | 0 | 0 | 0 | 0 | 0 | 0 | 0 |
| 0 | 0 | 0 | 3 | 0 | 2 | 0 | 0 | 0 | 0 | 0 |
| 0 | 0 | 0 | 0 | 0 | 0 | 0 | 0 | 0 | 0 | 0 |
| 0 | 0 | 0 | 1 | 0 | 0 | 0 | 0 | 0 | 0 | 0 |
| 0 | 0 | 0 | 2 | 0 | 0 | 0 | 0 | 0 | 0 | 0 |
| 0 | 0 | 0 | 1 | 0 | 0 | 0 | 0 | 0 | 0 | 0 |
| 0 | 0 | 0 | 5 | 0 | 0 | 0 | 0 | 0 | 0 | 0 |

|   |   |   |   |   |   |   |   |   |   |   |
|---|---|---|---|---|---|---|---|---|---|---|
| 0 | 0 | 0 | 1 | 0 | 0 | 0 | 0 | 0 | 0 | 0 |
| 0 | 0 | 0 | 5 | 0 | 0 | 0 | 0 | 0 | 0 | 0 |
| 0 | 0 | 0 | 2 | 0 | 1 | 0 | 0 | 0 | 0 | 0 |
| 0 | 0 | 0 | 2 | 0 | 1 | 0 | 0 | 0 | 0 | 0 |
| 0 | 0 | 0 | 1 | 0 | 0 | 0 | 0 | 0 | 0 | 0 |
| 0 | 0 | 0 | 0 | 0 | 1 | 0 | 0 | 0 | 0 | 0 |
| 0 | 0 | 0 | 4 | 0 | 0 | 0 | 0 | 0 | 0 | 0 |
| 0 | 0 | 0 | 0 | 0 | 1 | 0 | 0 | 0 | 0 | 0 |
| 0 | 0 | 0 | 1 | 0 | 0 | 0 | 0 | 0 | 0 | 0 |
| 0 | 0 | 0 | 1 | 0 | 0 | 0 | 0 | 0 | 0 | 0 |
| 0 | 0 | 0 | 1 | 0 | 1 | 0 | 0 | 0 | 0 | 0 |
| 0 | 0 | 0 | 1 | 0 | 0 | 0 | 0 | 0 | 0 | 0 |
| 0 | 0 | 0 | 1 | 0 | 0 | 0 | 0 | 0 | 0 | 0 |
| 0 | 0 | 0 | 1 | 0 | 0 | 0 | 0 | 0 | 0 | 0 |
| 0 | 0 | 0 | 1 | 0 | 0 | 0 | 0 | 0 | 0 | 0 |
| 0 | 0 | 0 | 0 | 0 | 0 | 0 | 0 | 0 | 0 | 0 |
| 0 | 0 | 0 | 0 | 0 | 0 | 0 | 0 | 0 | 0 | 0 |
| 0 | 0 | 0 | 0 | 0 | 0 | 0 | 0 | 0 | 0 | 0 |
| 0 | 0 | 0 | 2 | 0 | 0 | 0 | 0 | 0 | 0 | 0 |
| 0 | 0 | 0 | 7 | 0 | 0 | 0 | 0 | 0 | 0 | 0 |
| 0 | 0 | 0 | 0 | 0 | 1 | 0 | 0 | 0 | 0 | 0 |
| 0 | 0 | 0 | 3 | 0 | 0 | 0 | 0 | 0 | 0 | 0 |
| 0 | 0 | 0 | 4 | 0 | 0 | 0 | 0 | 0 | 0 | 0 |
| 0 | 0 | 0 | 2 | 0 | 0 | 0 | 0 | 0 | 0 | 0 |
| 0 | 0 | 0 | 2 | 0 | 0 | 0 | 0 | 0 | 0 | 0 |
| 0 | 0 | 0 | 2 | 0 | 0 | 0 | 0 | 0 | 0 | 0 |
| 0 | 0 | 0 | 2 | 0 | 1 | 0 | 0 | 0 | 0 | 0 |
| 0 | 0 | 0 | 2 | 0 | 0 | 0 | 0 | 0 | 0 | 0 |
| 0 | 0 | 0 | 3 | 0 | 0 | 0 | 0 | 0 | 0 | 0 |





|   |   |   |   |   |   |   |   |   |   |   |
|---|---|---|---|---|---|---|---|---|---|---|
| 0 | 0 | 0 | 0 | 0 | 0 | 0 | 0 | 0 | 0 | 0 |
| 0 | 0 | 0 | 0 | 0 | 0 | 0 | 0 | 0 | 0 | 0 |
| 0 | 0 | 0 | 1 | 0 | 1 | 0 | 0 | 0 | 0 | 0 |
| 0 | 0 | 0 | 0 | 0 | 0 | 0 | 0 | 0 | 0 | 0 |
| 0 | 0 | 0 | 1 | 0 | 0 | 0 | 0 | 0 | 0 | 0 |
| 1 | 0 | 0 | 1 | 0 | 2 | 0 | 0 | 0 | 0 | 2 |
| 0 | 0 | 0 | 1 | 0 | 0 | 0 | 0 | 0 | 0 | 0 |
| 0 | 0 | 0 | 0 | 0 | 0 | 0 | 1 | 0 | 0 | 1 |
| 0 | 0 | 0 | 1 | 0 | 1 | 0 | 0 | 1 | 0 | 1 |
| 0 | 0 | 0 | 0 | 0 | 0 | 0 | 0 | 0 | 0 | 0 |
| 0 | 0 | 0 | 1 | 0 | 0 | 0 | 0 | 0 | 0 | 1 |
| 0 | 0 | 0 | 0 | 0 | 0 | 0 | 0 | 0 | 0 | 0 |
| 0 | 0 | 0 | 0 | 0 | 0 | 0 | 0 | 0 | 0 | 1 |
| 0 | 0 | 0 | 0 | 0 | 0 | 0 | 0 | 0 | 0 | 1 |
| 0 | 0 | 0 | 0 | 0 | 0 | 0 | 0 | 0 | 0 | 1 |
| 0 | 0 | 0 | 0 | 0 | 2 | 0 | 0 | 0 | 0 | 0 |
| 0 | 0 | 0 | 0 | 0 | 0 | 0 | 0 | 0 | 0 | 0 |
| 0 | 0 | 1 | 0 | 0 | 0 | 0 | 0 | 0 | 0 | 1 |
| 0 | 0 | 0 | 0 | 0 | 0 | 0 | 0 | 0 | 0 | 0 |
| 0 | 0 | 0 | 0 | 0 | 0 | 0 | 0 | 0 | 0 | 0 |
| 0 | 0 | 0 | 0 | 0 | 0 | 0 | 0 | 0 | 0 | 2 |
| 0 | 0 | 0 | 0 | 0 | 0 | 0 | 0 | 0 | 0 | 2 |
| 0 | 0 | 0 | 0 | 0 | 0 | 0 | 0 | 0 | 0 | 2 |
| 0 | 0 | 0 | 0 | 0 | 0 | 0 | 0 | 0 | 0 | 1 |
| 0 | 0 | 0 | 0 | 0 | 0 | 0 | 0 | 0 | 0 | 0 |
| 0 | 0 | 0 | 0 | 0 | 0 | 0 | 0 | 1 | 0 | 1 |
| 0 | 0 | 0 | 0 | 0 | 0 | 0 | 0 | 0 | 0 | 0 |
| 0 | 0 | 0 | 1 | 0 | 0 | 0 | 0 | 3 | 0 | 1 |

|   |   |   |   |   |   |    |   |   |   |   |
|---|---|---|---|---|---|----|---|---|---|---|
| 0 | 0 | 0 | 0 | 0 | 0 | 0  | 0 | 0 | 0 | 0 |
| 0 | 0 | 0 | 0 | 0 | 2 | 0  | 0 | 0 | 0 | 0 |
| 0 | 0 | 0 | 0 | 0 | 0 | 0  | 0 | 0 | 0 | 0 |
| 1 | 0 | 0 | 0 | 0 | 0 | 0  | 0 | 0 | 0 | 0 |
| 0 | 0 | 0 | 0 | 0 | 0 | 2  | 0 | 0 | 0 | 0 |
| 0 | 0 | 0 | 0 | 0 | 0 | 0  | 0 | 0 | 0 | 0 |
| 0 | 0 | 0 | 0 | 0 | 0 | 0  | 0 | 0 | 0 | 0 |
| 0 | 0 | 0 | 0 | 0 | 0 | 1  | 0 | 0 | 0 | 0 |
| 0 | 0 | 0 | 0 | 0 | 0 | 1  | 0 | 0 | 0 | 0 |
| 0 | 0 | 0 | 0 | 0 | 0 | 2  | 0 | 0 | 0 | 0 |
| 0 | 0 | 0 | 0 | 0 | 0 | 0  | 0 | 0 | 0 | 0 |
| 0 | 0 | 0 | 0 | 0 | 1 | 0  | 0 | 0 | 0 | 2 |
| 0 | 0 | 0 | 0 | 0 | 0 | 0  | 0 | 0 | 0 | 0 |
| 0 | 0 | 0 | 0 | 0 | 0 | 0  | 1 | 0 | 0 | 0 |
| 0 | 0 | 0 | 0 | 0 | 0 | 0  | 1 | 0 | 0 | 0 |
| 0 | 0 | 0 | 0 | 0 | 0 | 0  | 0 | 0 | 0 | 0 |
| 0 | 0 | 0 | 0 | 0 | 0 | 0  | 0 | 0 | 0 | 0 |
| 0 | 0 | 0 | 0 | 0 | 0 | 3  | 1 | 0 | 0 | 1 |
| 0 | 0 | 0 | 0 | 0 | 0 | 0  | 0 | 1 | 0 | 1 |
| 0 | 0 | 0 | 0 | 0 | 0 | 4  | 0 | 0 | 0 | 0 |
| 0 | 0 | 0 | 0 | 0 | 0 | 0  | 0 | 1 | 0 | 1 |
| 0 | 0 | 0 | 0 | 0 | 0 | 2  | 1 | 0 | 0 | 1 |
| 0 | 0 | 0 | 0 | 0 | 0 | 3  | 1 | 0 | 0 | 2 |
| 0 | 0 | 0 | 1 | 0 | 0 | 5  | 0 | 0 | 0 | 0 |
| 0 | 0 | 0 | 0 | 0 | 0 | 4  | 0 | 0 | 0 | 0 |
| 0 | 0 | 0 | 0 | 0 | 0 | 6  | 0 | 0 | 0 | 0 |
| 0 | 0 | 0 | 0 | 0 | 0 | 3  | 0 | 0 | 0 | 0 |
| 0 | 0 | 0 | 0 | 0 | 0 | 11 | 0 | 2 | 0 | 0 |
| 0 | 0 | 0 | 0 | 0 | 0 | 5  | 0 | 0 | 0 | 0 |

|   |   |   |   |   |   |    |   |   |    |   |
|---|---|---|---|---|---|----|---|---|----|---|
| 0 | 0 | 0 | 0 | 0 | 0 | 2  | 0 | 0 | 0  | 0 |
| 0 | 0 | 0 | 0 | 0 | 0 | 6  | 0 | 0 | 0  | 0 |
| 0 | 0 | 0 | 0 | 0 | 0 | 4  | 0 | 0 | 0  | 0 |
| 0 | 0 | 0 | 0 | 0 | 2 | 1  | 0 | 0 | 0  | 0 |
| 0 | 0 | 0 | 0 | 0 | 0 | 12 | 0 | 0 | 0  | 0 |
| 0 | 0 | 0 | 0 | 0 | 0 | 11 | 0 | 0 | 0  | 0 |
| 0 | 0 | 0 | 0 | 0 | 0 | 8  | 0 | 0 | 0  | 0 |
| 0 | 0 | 0 | 1 | 0 | 0 | 7  | 0 | 0 | 0  | 0 |
| 0 | 0 | 0 | 0 | 0 | 0 | 6  | 0 | 0 | 5  | 0 |
| 0 | 0 | 0 | 0 | 0 | 0 | 4  | 0 | 0 | 1  | 0 |
| 0 | 0 | 0 | 0 | 0 | 0 | 4  | 0 | 0 | 0  | 0 |
| 0 | 0 | 0 | 0 | 0 | 0 | 9  | 0 | 0 | 8  | 0 |
| 0 | 0 | 0 | 0 | 0 | 0 | 10 | 0 | 1 | 1  | 0 |
| 0 | 0 | 0 | 0 | 0 | 0 | 9  | 0 | 0 | 0  | 0 |
| 0 | 0 | 0 | 0 | 0 | 0 | 5  | 0 | 0 | 2  | 0 |
| 0 | 0 | 0 | 0 | 0 | 0 | 6  | 0 | 1 | 2  | 0 |
| 0 | 0 | 0 | 0 | 0 | 0 | 12 | 0 | 0 | 2  | 0 |
| 0 | 0 | 0 | 0 | 0 | 0 | 8  | 0 | 0 | 5  | 0 |
| 0 | 0 | 0 | 0 | 0 | 0 | 2  | 0 | 0 | 3  | 0 |
| 0 | 0 | 0 | 0 | 0 | 0 | 7  | 0 | 0 | 14 | 0 |
| 0 | 0 | 0 | 0 | 0 | 0 | 6  | 0 | 0 | 0  | 0 |
| 0 | 0 | 0 | 0 | 0 | 0 | 11 | 0 | 0 | 1  | 0 |
| 0 | 0 | 0 | 0 | 0 | 0 | 8  | 0 | 0 | 1  | 0 |
| 0 | 0 | 0 | 0 | 0 | 1 | 8  | 0 | 0 | 0  | 0 |
| 0 | 0 | 0 | 0 | 0 | 0 | 13 | 0 | 0 | 3  | 0 |
| 0 | 0 | 0 | 0 | 0 | 0 | 9  | 0 | 2 | 0  | 0 |
| 0 | 0 | 0 | 0 | 0 | 0 | 3  | 0 | 0 | 0  | 0 |
| 0 | 0 | 0 | 0 | 0 | 0 | 4  | 0 | 0 | 0  | 0 |
| 0 | 0 | 0 | 0 | 0 | 0 | 5  | 0 | 0 | 1  | 0 |



|   |   |   |   |   |   |    |   |   |   |   |
|---|---|---|---|---|---|----|---|---|---|---|
| 0 | 0 | 0 | 0 | 0 | 1 | 9  | 0 | 0 | 0 | 0 |
| 0 | 0 | 0 | 0 | 0 | 0 | 5  | 0 | 4 | 1 | 0 |
| 0 | 0 | 0 | 0 | 0 | 0 | 5  | 0 | 0 | 0 | 0 |
| 0 | 0 | 0 | 0 | 0 | 0 | 7  | 0 | 0 | 1 | 0 |
| 0 | 0 | 0 | 0 | 0 | 0 | 6  | 0 | 2 | 0 | 0 |
| 0 | 0 | 0 | 0 | 1 | 0 | 8  | 0 | 0 | 0 | 0 |
| 0 | 0 | 0 | 0 | 0 | 1 | 13 | 0 | 0 | 0 | 0 |
| 0 | 0 | 0 | 0 | 0 | 1 | 4  | 0 | 0 | 0 | 0 |
| 0 | 0 | 0 | 0 | 0 | 0 | 5  | 0 | 0 | 0 | 0 |
| 0 | 0 | 0 | 0 | 0 | 0 | 3  | 0 | 0 | 0 | 0 |
| 0 | 0 | 0 | 0 | 0 | 0 | 8  | 0 | 4 | 0 | 0 |
| 0 | 0 | 0 | 0 | 0 | 0 | 2  | 0 | 0 | 0 | 1 |
| 0 | 0 | 0 | 0 | 0 | 1 | 6  | 0 | 0 | 0 | 0 |
| 0 | 0 | 0 | 0 | 0 | 0 | 7  | 0 | 1 | 0 | 0 |
| 0 | 0 | 0 | 0 | 0 | 0 | 2  | 0 | 2 | 0 | 0 |
| 0 | 0 | 0 | 0 | 0 | 0 | 2  | 1 | 0 | 0 | 0 |
| 0 | 0 | 0 | 0 | 0 | 0 | 4  | 0 | 0 | 0 | 0 |
| 0 | 0 | 0 | 0 | 0 | 0 | 5  | 0 | 1 | 0 | 0 |
| 0 | 0 | 0 | 0 | 0 | 0 | 4  | 0 | 0 | 0 | 0 |
| 0 | 0 | 0 | 0 | 0 | 0 | 2  | 0 | 2 | 0 | 1 |
| 0 | 0 | 0 | 0 | 0 | 0 | 3  | 0 | 1 | 0 | 0 |
| 0 | 0 | 0 | 0 | 0 | 0 | 1  | 0 | 2 | 0 | 0 |
| 0 | 0 | 0 | 0 | 0 | 0 | 5  | 0 | 1 | 0 | 0 |
| 0 | 0 | 0 | 0 | 1 | 0 | 0  | 0 | 3 | 0 | 0 |
| 0 | 0 | 0 | 0 | 1 | 1 | 4  | 0 | 5 | 0 | 1 |
| 0 | 0 | 0 | 0 | 0 | 0 | 0  | 0 | 2 | 0 | 0 |
| 0 | 0 | 0 | 0 | 0 | 0 | 1  | 0 | 0 | 0 | 0 |
| 0 | 0 | 0 | 0 | 0 | 0 | 0  | 0 | 0 | 0 | 0 |
| 0 | 0 | 0 | 0 | 0 | 2 | 2  | 0 | 2 | 0 | 2 |





|   |   |   |   |   |   |   |   |   |   |   |
|---|---|---|---|---|---|---|---|---|---|---|
| 0 | 0 | 0 | 0 | 0 | 0 | 0 | 0 | 0 | 0 | 0 |
| 0 | 0 | 0 | 0 | 0 | 0 | 0 | 0 | 0 | 0 | 0 |
| 0 | 0 | 0 | 0 | 0 | 0 | 0 | 0 | 1 | 0 | 2 |
| 0 | 0 | 0 | 0 | 0 | 0 | 0 | 0 | 0 | 0 | 0 |
| 0 | 0 | 0 | 0 | 0 | 0 | 0 | 0 | 0 | 0 | 0 |
| 0 | 0 | 0 | 0 | 0 | 0 | 0 | 0 | 0 | 0 | 0 |
| 0 | 0 | 0 | 0 | 0 | 0 | 0 | 0 | 0 | 0 | 0 |
| 0 | 0 | 0 | 0 | 0 | 0 | 0 | 0 | 0 | 0 | 0 |
| 0 | 0 | 0 | 0 | 0 | 0 | 0 | 0 | 0 | 0 | 1 |
| 0 | 0 | 0 | 0 | 0 | 0 | 0 | 0 | 0 | 0 | 0 |
| 0 | 0 | 0 | 0 | 0 | 0 | 0 | 0 | 0 | 0 | 0 |
| 0 | 0 | 0 | 0 | 0 | 0 | 0 | 0 | 0 | 0 | 0 |
| 0 | 0 | 0 | 0 | 0 | 0 | 0 | 0 | 1 | 0 | 0 |
| 0 | 0 | 0 | 0 | 0 | 0 | 0 | 0 | 0 | 0 | 0 |
| 0 | 0 | 0 | 0 | 0 | 2 | 0 | 0 | 1 | 0 | 0 |
| 0 | 0 | 0 | 0 | 0 | 0 | 0 | 0 | 0 | 0 | 1 |
| 0 | 0 | 0 | 0 | 0 | 0 | 0 | 2 | 2 | 0 | 0 |
| 0 | 0 | 0 | 0 | 0 | 0 | 0 | 0 | 0 | 0 | 1 |
| 0 | 0 | 0 | 0 | 0 | 0 | 0 | 0 | 0 | 0 | 1 |
| 0 | 0 | 0 | 0 | 0 | 1 | 0 | 0 | 0 | 0 | 1 |
| 0 | 0 | 0 | 0 | 0 | 1 | 0 | 0 | 0 | 0 | 0 |
| 0 | 0 | 0 | 0 | 0 | 0 | 0 | 0 | 0 | 0 | 0 |
| 0 | 0 | 0 | 0 | 0 | 0 | 0 | 0 | 0 | 0 | 0 |
| 0 | 0 | 0 | 0 | 0 | 0 | 0 | 0 | 0 | 0 | 0 |
| 0 | 0 | 0 | 0 | 0 | 0 | 0 | 0 | 0 | 0 | 0 |
| 0 | 0 | 0 | 0 | 0 | 0 | 0 | 0 | 2 | 0 | 0 |
| 0 | 0 | 0 | 0 | 0 | 0 | 0 | 0 | 1 | 0 | 0 |
| 0 | 0 | 0 | 0 | 0 | 2 | 0 | 0 | 1 | 0 | 1 |
| 0 | 0 | 0 | 0 | 0 | 0 | 0 | 0 | 2 | 0 | 2 |
| 0 | 0 | 0 | 0 | 0 | 0 | 0 | 0 | 0 | 0 | 0 |
| 0 | 0 | 0 | 0 | 0 | 0 | 0 | 0 | 2 | 0 | 1 |

|   |   |   |   |   |   |    |   |   |   |   |
|---|---|---|---|---|---|----|---|---|---|---|
| 0 | 0 | 0 | 0 | 0 | 0 | 0  | 0 | 0 | 0 | 2 |
| 0 | 0 | 0 | 0 | 0 | 0 | 0  | 0 | 0 | 0 | 0 |
| 0 | 0 | 0 | 0 | 0 | 0 | 0  | 0 | 0 | 0 | 1 |
| 0 | 0 | 0 | 0 | 0 | 0 | 0  | 0 | 0 | 0 | 0 |
| 0 | 0 | 0 | 0 | 0 | 0 | 0  | 0 | 0 | 0 | 0 |
| 0 | 0 | 0 | 0 | 0 | 0 | 0  | 0 | 0 | 0 | 2 |
| 0 | 0 | 0 | 0 | 0 | 0 | 0  | 0 | 0 | 0 | 0 |
| 0 | 0 | 0 | 0 | 0 | 0 | 0  | 0 | 0 | 0 | 0 |
| 0 | 0 | 0 | 0 | 0 | 0 | 0  | 0 | 1 | 0 | 0 |
| 0 | 0 | 0 | 0 | 0 | 0 | 0  | 0 | 2 | 0 | 0 |
| 0 | 0 | 0 | 0 | 0 | 2 | 0  | 0 | 1 | 0 | 0 |
| 0 | 0 | 0 | 0 | 0 | 0 | 0  | 0 | 0 | 0 | 0 |
| 0 | 0 | 0 | 0 | 0 | 0 | 0  | 0 | 2 | 0 | 1 |
| 0 | 0 | 0 | 0 | 0 | 0 | 0  | 0 | 0 | 0 | 0 |
| 0 | 0 | 0 | 0 | 0 | 2 | 0  | 0 | 4 | 0 | 0 |
| 0 | 0 | 0 | 0 | 0 | 1 | 3  | 0 | 0 | 0 | 0 |
| 0 | 0 | 0 | 0 | 0 | 0 | 0  | 0 | 1 | 0 | 1 |
| 0 | 0 | 0 | 0 | 0 | 0 | 0  | 0 | 0 | 0 | 1 |
| 0 | 0 | 0 | 0 | 0 | 0 | 0  | 0 | 0 | 0 | 1 |
| 0 | 0 | 0 | 0 | 0 | 0 | 0  | 0 | 0 | 0 | 1 |
| 0 | 0 | 0 | 0 | 0 | 0 | 0  | 0 | 1 | 0 | 1 |
| 0 | 0 | 0 | 0 | 0 | 0 | 0  | 0 | 2 | 0 | 1 |
| 0 | 0 | 0 | 0 | 0 | 0 | 1  | 0 | 0 | 0 | 0 |
| 0 | 0 | 0 | 0 | 0 | 0 | 0  | 0 | 2 | 0 | 0 |
| 0 | 0 | 0 | 0 | 0 | 2 | 1  | 0 | 0 | 0 | 0 |
| 0 | 0 | 0 | 0 | 0 | 0 | 11 | 0 | 0 | 0 | 0 |
| 0 | 0 | 0 | 0 | 0 | 0 | 3  | 0 | 0 | 0 | 0 |
| 0 | 0 | 0 | 0 | 0 | 0 | 5  | 0 | 1 | 0 | 0 |
| 0 | 0 | 0 | 0 | 0 | 0 | 1  | 0 | 2 | 0 | 0 |

|   |   |   |   |   |   |    |   |   |   |   |
|---|---|---|---|---|---|----|---|---|---|---|
| 0 | 0 | 0 | 0 | 0 | 0 | 4  | 0 | 0 | 0 | 0 |
| 0 | 0 | 0 | 0 | 0 | 1 | 1  | 0 | 1 | 0 | 0 |
| 0 | 0 | 0 | 0 | 0 | 0 | 2  | 0 | 0 | 0 | 0 |
| 0 | 0 | 0 | 0 | 0 | 0 | 1  | 0 | 8 | 0 | 0 |
| 0 | 0 | 0 | 0 | 0 | 0 | 5  | 0 | 0 | 0 | 0 |
| 0 | 0 | 0 | 0 | 0 | 0 | 12 | 0 | 1 | 0 | 0 |
| 0 | 0 | 0 | 0 | 0 | 0 | 10 | 0 | 2 | 0 | 0 |
| 0 | 0 | 0 | 0 | 0 | 0 | 2  | 0 | 0 | 0 | 0 |
| 0 | 0 | 0 | 0 | 0 | 0 | 4  | 0 | 0 | 0 | 0 |
| 0 | 0 | 0 | 0 | 0 | 0 | 15 | 0 | 0 | 0 | 0 |
| 0 | 0 | 0 | 0 | 0 | 0 | 6  | 0 | 0 | 0 | 0 |
| 0 | 0 | 0 | 0 | 0 | 0 | 6  | 0 | 1 | 0 | 0 |
| 0 | 0 | 0 | 0 | 0 | 0 | 5  | 0 | 1 | 0 | 0 |
| 0 | 0 | 0 | 0 | 0 | 0 | 5  | 0 | 0 | 0 | 0 |
| 0 | 0 | 0 | 0 | 0 | 0 | 4  | 0 | 0 | 0 | 0 |
| 0 | 0 | 0 | 0 | 0 | 0 | 5  | 0 | 0 | 0 | 0 |
| 0 | 0 | 0 | 0 | 0 | 0 | 1  | 1 | 0 | 0 | 0 |
| 0 | 0 | 0 | 0 | 0 | 0 | 1  | 0 | 0 | 4 | 0 |
| 0 | 0 | 0 | 0 | 0 | 0 | 2  | 0 | 0 | 0 | 0 |
| 0 | 0 | 0 | 0 | 0 | 0 | 4  | 0 | 1 | 1 | 0 |
| 0 | 0 | 0 | 0 | 0 | 0 | 3  | 0 | 0 | 0 | 0 |
| 0 | 0 | 0 | 0 | 0 | 0 | 1  | 0 | 0 | 0 | 0 |
| 0 | 0 | 0 | 0 | 0 | 0 | 8  | 0 | 0 | 0 | 0 |
| 0 | 0 | 0 | 0 | 0 | 0 | 6  | 0 | 0 | 0 | 0 |
| 0 | 0 | 0 | 0 | 0 | 0 | 5  | 0 | 0 | 0 | 0 |
| 0 | 0 | 0 | 0 | 0 | 0 | 7  | 0 | 0 | 0 | 0 |
| 0 | 1 | 0 | 0 | 0 | 0 | 4  | 0 | 0 | 0 | 0 |
| 0 | 0 | 0 | 0 | 0 | 0 | 8  | 0 | 5 | 0 | 0 |
| 0 | 0 | 0 | 0 | 0 | 0 | 3  | 0 | 0 | 1 | 0 |

|   |   |   |   |   |   |   |   |   |   |   |
|---|---|---|---|---|---|---|---|---|---|---|
| 0 | 0 | 0 | 0 | 0 | 0 | 5 | 0 | 1 | 1 | 0 |
| 0 | 0 | 0 | 0 | 0 | 0 | 8 | 0 | 0 | 2 | 0 |
| 0 | 0 | 0 | 0 | 0 | 0 | 5 | 0 | 0 | 0 | 0 |
| 0 | 0 | 0 | 0 | 0 | 0 | 3 | 0 | 0 | 0 | 0 |
| 0 | 0 | 0 | 0 | 0 | 0 | 6 | 0 | 0 | 0 | 0 |
| 0 | 0 | 0 | 0 | 0 | 0 | 3 | 0 | 1 | 2 | 0 |
| 0 | 0 | 0 | 0 | 0 | 0 | 1 | 0 | 0 | 0 | 0 |
| 0 | 0 | 0 | 0 | 0 | 1 | 3 | 0 | 0 | 0 | 0 |
| 0 | 0 | 0 | 0 | 0 | 2 | 0 | 0 | 0 | 0 | 0 |
| 0 | 0 | 0 | 0 | 0 | 0 | 4 | 0 | 0 | 0 | 0 |
| 0 | 0 | 0 | 0 | 0 | 0 | 2 | 0 | 0 | 0 | 0 |
| 0 | 0 | 0 | 0 | 0 | 0 | 3 | 0 | 0 | 0 | 0 |
| 0 | 0 | 0 | 0 | 0 | 0 | 3 | 0 | 0 | 0 | 0 |
| 0 | 0 | 0 | 0 | 0 | 0 | 1 | 0 | 0 | 0 | 0 |
| 0 | 0 | 0 | 0 | 0 | 0 | 0 | 0 | 1 | 0 | 0 |
| 0 | 0 | 0 | 0 | 0 | 0 | 5 | 0 | 2 | 0 | 0 |
| 0 | 0 | 0 | 0 | 0 | 0 | 1 | 0 | 0 | 1 | 0 |
| 0 | 0 | 0 | 0 | 0 | 0 | 2 | 0 | 0 | 0 | 0 |
| 0 | 0 | 0 | 0 | 0 | 0 | 3 | 0 | 0 | 0 | 0 |
| 0 | 0 | 0 | 0 | 0 | 0 | 2 | 0 | 0 | 0 | 0 |
| 0 | 0 | 0 | 0 | 0 | 0 | 1 | 0 | 1 | 0 | 0 |
| 0 | 0 | 0 | 0 | 0 | 0 | 0 | 0 | 0 | 0 | 0 |
| 0 | 0 | 0 | 0 | 0 | 0 | 0 | 0 | 1 | 0 | 0 |
| 0 | 0 | 0 | 0 | 0 | 0 | 4 | 0 | 0 | 0 | 0 |
| 0 | 0 | 0 | 0 | 0 | 0 | 2 | 0 | 0 | 0 | 0 |
| 0 | 0 | 0 | 0 | 0 | 0 | 1 | 0 | 0 | 0 | 0 |
| 0 | 0 | 0 | 0 | 0 | 0 | 1 | 0 | 1 | 0 | 0 |
| 0 | 0 | 0 | 0 | 0 | 0 | 0 | 0 | 0 | 0 | 0 |
| 0 | 0 | 0 | 0 | 0 | 0 | 2 | 0 | 0 | 1 | 0 |

|   |   |   |   |   |   |   |   |   |   |   |
|---|---|---|---|---|---|---|---|---|---|---|
| 0 | 0 | 0 | 0 | 0 | 0 | 0 | 0 | 0 | 0 | 0 |
| 0 | 0 | 0 | 0 | 0 | 0 | 1 | 0 | 2 | 0 | 0 |
| 0 | 0 | 0 | 0 | 0 | 0 | 0 | 0 | 0 | 0 | 0 |
| 0 | 0 | 0 | 0 | 0 | 0 | 2 | 0 | 0 | 0 | 0 |
| 0 | 0 | 0 | 0 | 0 | 0 | 0 | 0 | 0 | 0 | 0 |
| 0 | 0 | 0 | 0 | 0 | 0 | 0 | 1 | 1 | 0 | 0 |
| 0 | 0 | 0 | 0 | 0 | 0 | 0 | 0 | 0 | 0 | 0 |
| 0 | 0 | 0 | 0 | 0 | 0 | 1 | 0 | 0 | 0 | 0 |
| 0 | 0 | 0 | 0 | 0 | 0 | 1 | 0 | 0 | 0 | 0 |
| 0 | 0 | 0 | 0 | 0 | 0 | 0 | 0 | 1 | 0 | 1 |
| 0 | 0 | 0 | 0 | 0 | 1 | 1 | 0 | 0 | 0 | 0 |
| 0 | 0 | 0 | 0 | 0 | 0 | 1 | 0 | 1 | 0 | 0 |
| 0 | 0 | 0 | 0 | 0 | 0 | 0 | 0 | 1 | 0 | 0 |
| 0 | 0 | 0 | 0 | 0 | 0 | 0 | 0 | 0 | 0 | 0 |
| 0 | 0 | 0 | 0 | 0 | 1 | 2 | 0 | 1 | 0 | 0 |
| 0 | 0 | 0 | 0 | 0 | 0 | 0 | 1 | 0 | 0 | 2 |
| 0 | 0 | 0 | 0 | 0 | 0 | 0 | 0 | 0 | 0 | 0 |
| 0 | 0 | 0 | 0 | 0 | 0 | 1 | 0 | 0 | 0 | 0 |
| 0 | 0 | 0 | 0 | 0 | 1 | 0 | 0 | 0 | 0 | 0 |
| 0 | 0 | 0 | 0 | 0 | 0 | 0 | 0 | 0 | 0 | 0 |
| 0 | 0 | 0 | 0 | 1 | 1 | 1 | 0 | 0 | 0 | 0 |
| 0 | 0 | 0 | 0 | 0 | 0 | 0 | 1 | 0 | 0 | 1 |
| 0 | 0 | 0 | 0 | 0 | 2 | 0 | 0 | 0 | 0 | 1 |
| 0 | 0 | 0 | 0 | 0 | 0 | 0 | 0 | 1 | 0 | 1 |
| 0 | 0 | 0 | 0 | 0 | 0 | 0 | 0 | 5 | 0 | 0 |
| 0 | 0 | 0 | 0 | 0 | 0 | 0 | 0 | 0 | 0 | 0 |
| 0 | 0 | 0 | 0 | 0 | 0 | 0 | 0 | 3 | 0 | 0 |
| 0 | 0 | 0 | 0 | 0 | 0 | 0 | 0 | 0 | 0 | 1 |
| 0 | 0 | 0 | 0 | 0 | 1 | 0 | 0 | 3 | 0 | 1 |







|   |   |   |   |   |   |   |   |   |   |   |
|---|---|---|---|---|---|---|---|---|---|---|
| 0 | 0 | 0 | 0 | 0 | 0 | 0 | 1 | 0 | 0 | 0 |
| 0 | 0 | 0 | 0 | 0 | 0 | 0 | 0 | 0 | 0 | 0 |
| 0 | 0 | 0 | 0 | 0 | 0 | 0 | 1 | 0 | 0 | 0 |
| 0 | 0 | 0 | 0 | 0 | 0 | 0 | 1 | 0 | 0 | 0 |
| 0 | 0 | 0 | 0 | 0 | 0 | 0 | 0 | 0 | 0 | 0 |
| 0 | 0 | 0 | 0 | 0 | 0 | 0 | 0 | 0 | 0 | 0 |
| 0 | 2 | 0 | 0 | 0 | 0 | 0 | 0 | 0 | 0 | 0 |
| 0 | 0 | 0 | 0 | 0 | 0 | 4 | 1 | 0 | 0 | 0 |
| 0 | 0 | 0 | 0 | 0 | 0 | 1 | 0 | 0 | 0 | 0 |
| 0 | 0 | 0 | 0 | 0 | 0 | 0 | 1 | 0 | 0 | 0 |
| 0 | 0 | 0 | 0 | 0 | 0 | 0 | 0 | 0 | 0 | 0 |
| 0 | 0 | 0 | 0 | 0 | 0 | 0 | 2 | 0 | 0 | 0 |
| 0 | 0 | 0 | 0 | 0 | 0 | 0 | 0 | 0 | 0 | 0 |
| 0 | 0 | 0 | 0 | 0 | 0 | 0 | 0 | 0 | 0 | 0 |
| 0 | 0 | 0 | 0 | 0 | 0 | 0 | 0 | 0 | 0 | 0 |
| 0 | 0 | 0 | 0 | 0 | 0 | 0 | 1 | 0 | 0 | 0 |
| 0 | 0 | 0 | 0 | 0 | 0 | 0 | 0 | 0 | 0 | 0 |
| 0 | 0 | 0 | 0 | 0 | 0 | 0 | 1 | 0 | 0 | 0 |
| 0 | 0 | 0 | 0 | 0 | 0 | 0 | 1 | 0 | 0 | 0 |
| 0 | 0 | 0 | 0 | 0 | 0 | 0 | 1 | 0 | 0 | 0 |
| 0 | 0 | 0 | 0 | 0 | 0 | 0 | 1 | 0 | 0 | 0 |
| 0 | 0 | 0 | 0 | 0 | 0 | 0 | 1 | 0 | 0 | 0 |
| 0 | 0 | 0 | 0 | 0 | 0 | 0 | 1 | 0 | 0 | 0 |
| 0 | 0 | 0 | 0 | 0 | 0 | 0 | 0 | 1 | 0 | 0 |
| 0 | 0 | 0 | 0 | 0 | 0 | 0 | 2 | 1 | 0 | 0 |
| 0 | 0 | 0 | 0 | 0 | 0 | 0 | 0 | 0 | 0 | 0 |
| 0 | 0 | 0 | 0 | 0 | 0 | 0 | 1 | 0 | 0 | 0 |
| 0 | 0 | 0 | 0 | 0 | 0 | 0 | 0 | 0 | 0 | 0 |
| 0 | 0 | 0 | 0 | 0 | 0 | 0 | 0 | 0 | 0 | 0 |
| 0 | 0 | 0 | 0 | 0 | 0 | 0 | 1 | 0 | 0 | 0 |

|   |   |   |   |   |   |   |   |   |   |   |
|---|---|---|---|---|---|---|---|---|---|---|
| 0 | 0 | 0 | 0 | 0 | 0 | 0 | 0 | 0 | 0 | 0 |
| 0 | 0 | 0 | 0 | 0 | 0 | 0 | 1 | 0 | 0 | 0 |
| 0 | 0 | 0 | 0 | 0 | 0 | 0 | 2 | 0 | 0 | 0 |
| 0 | 1 | 0 | 0 | 0 | 0 | 0 | 1 | 0 | 0 | 0 |
| 0 | 0 | 0 | 0 | 0 | 0 | 0 | 0 | 0 | 0 | 0 |
| 0 | 0 | 0 | 0 | 0 | 0 | 0 | 0 | 0 | 0 | 0 |
| 0 | 0 | 0 | 0 | 0 | 0 | 0 | 1 | 0 | 0 | 0 |
| 0 | 0 | 0 | 0 | 0 | 0 | 0 | 0 | 0 | 0 | 0 |
| 0 | 0 | 0 | 0 | 0 | 0 | 0 | 0 | 0 | 0 | 0 |
| 0 | 0 | 0 | 0 | 0 | 0 | 0 | 0 | 0 | 0 | 0 |
| 0 | 1 | 0 | 0 | 0 | 0 | 0 | 1 | 0 | 0 | 0 |
| 0 | 0 | 0 | 0 | 0 | 0 | 0 | 1 | 0 | 0 | 0 |
| 0 | 0 | 0 | 0 | 0 | 0 | 0 | 0 | 0 | 0 | 0 |
| 0 | 0 | 0 | 0 | 0 | 0 | 0 | 0 | 0 | 0 | 0 |
| 0 | 0 | 0 | 0 | 0 | 0 | 0 | 0 | 0 | 0 | 0 |
| 0 | 0 | 0 | 0 | 0 | 0 | 0 | 0 | 0 | 0 | 0 |
| 0 | 0 | 0 | 0 | 0 | 0 | 0 | 1 | 0 | 0 | 0 |
| 0 | 0 | 0 | 0 | 0 | 0 | 0 | 0 | 0 | 1 | 0 |
| 0 | 0 | 0 | 0 | 0 | 0 | 0 | 0 | 0 | 0 | 0 |
| 0 | 0 | 0 | 0 | 0 | 0 | 0 | 0 | 0 | 0 | 0 |
| 0 | 0 | 0 | 0 | 0 | 0 | 0 | 0 | 0 | 0 | 0 |
| 0 | 0 | 0 | 0 | 0 | 0 | 0 | 0 | 0 | 0 | 0 |
| 0 | 0 | 0 | 0 | 0 | 0 | 0 | 0 | 0 | 0 | 0 |
| 0 | 0 | 0 | 0 | 0 | 0 | 0 | 0 | 0 | 0 | 0 |
| 0 | 1 | 0 | 0 | 0 | 0 | 0 | 1 | 0 | 0 | 0 |
| 0 | 1 | 0 | 0 | 0 | 0 | 0 | 1 | 0 | 0 | 0 |
| 0 | 0 | 0 | 0 | 0 | 0 | 0 | 2 | 0 | 0 | 0 |
| 0 | 0 | 0 | 0 | 0 | 0 | 0 | 1 | 0 | 0 | 0 |
| 0 | 0 | 0 | 0 | 0 | 0 | 0 | 1 | 0 | 0 | 0 |
| 0 | 2 | 0 | 0 | 1 | 0 | 0 | 0 | 0 | 0 | 0 |
| 0 | 2 | 0 | 0 | 0 | 0 | 0 | 1 | 0 | 0 | 0 |















|   |   |   |   |   |   |   |   |   |   |   |
|---|---|---|---|---|---|---|---|---|---|---|
| 0 | 1 | 0 | 0 | 0 | 0 | 0 | 1 | 1 | 0 | 0 |
| 0 | 0 | 0 | 0 | 0 | 0 | 0 | 0 | 0 | 0 | 0 |
| 0 | 1 | 0 | 0 | 0 | 0 | 0 | 0 | 0 | 0 | 0 |
| 0 | 1 | 0 | 0 | 0 | 0 | 0 | 2 | 0 | 0 | 0 |
| 0 | 0 | 0 | 0 | 0 | 0 | 0 | 3 | 0 | 0 | 0 |
| 0 | 1 | 0 | 0 | 0 | 0 | 0 | 3 | 0 | 0 | 0 |
| 0 | 0 | 0 | 0 | 0 | 0 | 0 | 1 | 0 | 0 | 0 |
| 0 | 0 | 0 | 0 | 0 | 0 | 0 | 0 | 0 | 0 | 0 |
| 0 | 0 | 0 | 0 | 0 | 0 | 0 | 0 | 0 | 0 | 0 |
| 0 | 0 | 0 | 0 | 0 | 0 | 0 | 1 | 0 | 0 | 0 |
| 0 | 0 | 0 | 0 | 0 | 0 | 0 | 1 | 0 | 0 | 0 |
| 0 | 0 | 0 | 0 | 0 | 0 | 0 | 0 | 0 | 0 | 0 |
| 0 | 0 | 0 | 0 | 0 | 0 | 0 | 1 | 0 | 0 | 0 |
| 0 | 0 | 0 | 0 | 0 | 0 | 0 | 0 | 0 | 0 | 0 |
| 0 | 0 | 0 | 0 | 0 | 0 | 0 | 0 | 0 | 0 | 0 |
| 0 | 0 | 0 | 0 | 0 | 0 | 0 | 0 | 0 | 0 | 0 |
| 0 | 0 | 0 | 0 | 0 | 0 | 0 | 0 | 0 | 0 | 0 |
| 0 | 0 | 0 | 0 | 0 | 0 | 0 | 0 | 0 | 0 | 0 |
| 0 | 0 | 0 | 0 | 0 | 0 | 0 | 0 | 0 | 0 | 0 |
| 0 | 0 | 0 | 0 | 0 | 0 | 0 | 0 | 0 | 0 | 0 |
| 0 | 0 | 0 | 0 | 0 | 0 | 0 | 0 | 0 | 0 | 0 |
| 0 | 0 | 0 | 0 | 0 | 0 | 0 | 0 | 0 | 0 | 0 |
| 0 | 0 | 0 | 0 | 0 | 0 | 0 | 0 | 0 | 0 | 0 |
| 0 | 0 | 0 | 0 | 0 | 0 | 0 | 0 | 0 | 0 | 0 |
| 0 | 0 | 0 | 0 | 0 | 0 | 0 | 1 | 0 | 0 | 0 |
| 0 | 0 | 0 | 0 | 0 | 0 | 0 | 1 | 0 | 0 | 0 |
| 0 | 0 | 0 | 0 | 0 | 0 | 0 | 0 | 0 | 0 | 0 |
| 0 | 0 | 0 | 0 | 0 | 0 | 0 | 0 | 0 | 0 | 0 |
| 0 | 0 | 0 | 0 | 0 | 0 | 0 | 1 | 0 | 0 | 0 |



|   |   |   |   |   |   |   |   |   |   |   |
|---|---|---|---|---|---|---|---|---|---|---|
| 0 | 1 | 0 | 0 | 0 | 0 | 0 | 0 | 0 | 0 | 1 |
| 0 | 1 | 0 | 0 | 0 | 0 | 0 | 0 | 0 | 0 | 0 |
| 0 | 0 | 0 | 0 | 0 | 0 | 0 | 0 | 0 | 0 | 0 |
| 0 | 0 | 0 | 0 | 0 | 0 | 0 | 0 | 1 | 0 | 0 |
| 0 | 0 | 0 | 0 | 0 | 0 | 0 | 0 | 0 | 0 | 0 |
| 0 | 1 | 0 | 0 | 0 | 0 | 0 | 0 | 0 | 0 | 0 |
| 0 | 0 | 0 | 0 | 0 | 0 | 0 | 0 | 0 | 0 | 0 |
| 0 | 0 | 0 | 0 | 0 | 0 | 0 | 1 | 0 | 0 | 0 |
| 0 | 0 | 0 | 0 | 0 | 0 | 0 | 1 | 2 | 0 | 0 |
| 0 | 2 | 0 | 0 | 0 | 0 | 0 | 0 | 0 | 0 | 0 |
| 0 | 0 | 0 | 0 | 0 | 0 | 0 | 0 | 0 | 0 | 0 |
| 0 | 0 | 0 | 0 | 0 | 0 | 0 | 0 | 0 | 0 | 0 |
| 0 | 0 | 0 | 0 | 0 | 0 | 0 | 0 | 0 | 0 | 1 |
| 0 | 1 | 0 | 0 | 0 | 0 | 0 | 1 | 0 | 0 | 0 |
| 0 | 0 | 0 | 0 | 0 | 0 | 0 | 0 | 0 | 0 | 0 |
| 0 | 0 | 0 | 0 | 0 | 0 | 0 | 0 | 0 | 0 | 0 |
| 0 | 0 | 0 | 0 | 0 | 0 | 0 | 1 | 0 | 0 | 0 |
| 0 | 0 | 0 | 0 | 0 | 0 | 1 | 1 | 0 | 0 | 0 |
| 0 | 1 | 0 | 0 | 0 | 0 | 0 | 0 | 0 | 0 | 0 |
| 0 | 0 | 0 | 0 | 0 | 0 | 0 | 0 | 0 | 0 | 0 |
| 0 | 0 | 0 | 0 | 0 | 0 | 0 | 2 | 0 | 0 | 0 |
| 0 | 0 | 0 | 0 | 0 | 0 | 0 | 0 | 0 | 0 | 0 |
| 0 | 0 | 0 | 0 | 0 | 0 | 0 | 0 | 0 | 0 | 0 |
| 0 | 0 | 0 | 0 | 0 | 0 | 0 | 1 | 0 | 0 | 0 |
| 0 | 0 | 0 | 0 | 0 | 0 | 0 | 1 | 0 | 0 | 0 |
| 0 | 0 | 0 | 0 | 0 | 0 | 0 | 1 | 0 | 0 | 0 |
| 0 | 0 | 0 | 0 | 0 | 0 | 0 | 0 | 0 | 0 | 0 |
| 0 | 0 | 0 | 0 | 0 | 0 | 0 | 0 | 0 | 0 | 0 |
| 0 | 0 | 0 | 0 | 0 | 0 | 0 | 2 | 0 | 0 | 0 |
| 0 | 0 | 0 | 0 | 0 | 0 | 0 | 1 | 0 | 0 | 0 |

|   |   |   |   |   |   |   |   |   |   |   |   |   |
|---|---|---|---|---|---|---|---|---|---|---|---|---|
| 0 | 1 | 0 | 0 | 0 | 0 | 0 | 0 | 0 | 0 | 0 | 0 | 0 |
| 0 | 1 | 0 | 0 | 0 | 0 | 0 | 2 | 0 | 0 | 0 | 0 | 0 |
| 0 | 2 | 0 | 0 | 0 | 0 | 0 | 0 | 0 | 0 | 0 | 0 | 0 |
| 0 | 0 | 0 | 0 | 0 | 0 | 0 | 0 | 0 | 0 | 0 | 0 | 0 |
| 0 | 0 | 0 | 0 | 0 | 0 | 0 | 1 | 0 | 0 | 0 | 0 | 0 |
| 0 | 1 | 0 | 0 | 0 | 0 | 0 | 1 | 0 | 0 | 0 | 0 | 0 |
| 0 | 0 | 0 | 0 | 0 | 0 | 0 | 3 | 0 | 0 | 0 | 0 | 0 |
| 0 | 0 | 0 | 0 | 0 | 0 | 0 | 1 | 0 | 0 | 0 | 0 | 0 |
| 0 | 1 | 0 | 0 | 0 | 0 | 0 | 0 | 0 | 0 | 0 | 0 | 0 |
| 0 | 0 | 0 | 0 | 0 | 0 | 0 | 1 | 0 | 0 | 0 | 0 | 0 |
| 0 | 0 | 0 | 0 | 0 | 0 | 0 | 2 | 0 | 0 | 0 | 0 | 0 |
| 0 | 4 | 0 | 0 | 0 | 0 | 0 | 0 | 0 | 0 | 0 | 0 | 0 |
| 0 | 3 | 0 | 0 | 0 | 0 | 0 | 0 | 0 | 0 | 0 | 0 | 0 |
| 0 | 0 | 0 | 0 | 0 | 0 | 0 | 0 | 0 | 0 | 0 | 0 | 0 |
| 0 | 2 | 0 | 0 | 0 | 0 | 0 | 1 | 0 | 0 | 0 | 0 | 0 |
| 0 | 0 | 0 | 0 | 0 | 0 | 0 | 1 | 0 | 0 | 0 | 0 | 0 |
| 0 | 2 | 0 | 0 | 0 | 0 | 0 | 0 | 0 | 0 | 1 | 0 | 0 |
| 0 | 0 | 0 | 0 | 0 | 0 | 0 | 1 | 0 | 0 | 0 | 0 | 0 |
| 0 | 0 | 0 | 0 | 0 | 0 | 0 | 1 | 0 | 0 | 0 | 0 | 0 |
| 0 | 0 | 0 | 0 | 0 | 0 | 0 | 0 | 0 | 0 | 0 | 0 | 0 |
| 0 | 0 | 0 | 0 | 0 | 0 | 0 | 1 | 0 | 0 | 1 | 0 | 0 |
| 0 | 0 | 0 | 0 | 0 | 0 | 0 | 1 | 0 | 0 | 0 | 0 | 0 |
| 0 | 0 | 0 | 0 | 0 | 0 | 0 | 0 | 0 | 0 | 0 | 0 | 0 |
| 0 | 1 | 0 | 0 | 0 | 0 | 0 | 0 | 0 | 0 | 0 | 0 | 0 |
| 0 | 0 | 0 | 0 | 0 | 0 | 0 | 1 | 1 | 0 | 0 | 0 | 0 |
| 0 | 0 | 0 | 0 | 0 | 0 | 0 | 2 | 0 | 0 | 0 | 0 | 0 |
| 0 | 0 | 0 | 0 | 0 | 0 | 0 | 0 | 0 | 0 | 0 | 0 | 0 |
| 0 | 0 | 0 | 0 | 0 | 0 | 0 | 2 | 0 | 0 | 0 | 0 | 0 |
| 0 | 0 | 0 | 0 | 0 | 0 | 0 | 1 | 0 | 0 | 0 | 0 | 0 |

|   |   |   |   |   |   |   |   |   |   |   |
|---|---|---|---|---|---|---|---|---|---|---|
| 0 | 0 | 0 | 0 | 0 | 0 | 0 | 0 | 0 | 0 | 0 |
| 0 | 0 | 0 | 0 | 0 | 0 | 0 | 0 | 0 | 0 | 0 |
| 0 | 0 | 0 | 0 | 0 | 0 | 0 | 0 | 1 | 0 | 0 |
| 0 | 0 | 0 | 0 | 0 | 0 | 0 | 0 | 2 | 0 | 0 |
| 0 | 1 | 0 | 0 | 0 | 0 | 0 | 0 | 0 | 0 | 0 |
| 0 | 1 | 0 | 0 | 0 | 0 | 1 | 2 | 0 | 0 | 0 |
| 0 | 0 | 0 | 0 | 0 | 0 | 0 | 2 | 0 | 0 | 0 |
| 0 | 0 | 0 | 0 | 0 | 0 | 0 | 2 | 0 | 0 | 0 |
| 0 | 0 | 0 | 0 | 0 | 0 | 0 | 0 | 0 | 2 | 0 |
| 0 | 0 | 0 | 0 | 0 | 0 | 0 | 0 | 0 | 0 | 0 |
| 0 | 2 | 0 | 0 | 0 | 0 | 0 | 4 | 1 | 0 | 0 |
| 0 | 1 | 0 | 0 | 0 | 0 | 0 | 2 | 0 | 0 | 0 |
| 0 | 0 | 0 | 0 | 0 | 0 | 0 | 0 | 0 | 0 | 0 |
| 0 | 0 | 0 | 0 | 0 | 0 | 0 | 0 | 0 | 0 | 0 |
| 0 | 0 | 0 | 0 | 0 | 0 | 0 | 0 | 0 | 0 | 0 |
| 0 | 3 | 0 | 0 | 0 | 0 | 0 | 0 | 0 | 2 | 0 |
| 0 | 0 | 0 | 0 | 0 | 0 | 0 | 0 | 0 | 0 | 0 |
| 0 | 0 | 0 | 0 | 0 | 0 | 0 | 1 | 0 | 0 | 0 |
| 0 | 0 | 0 | 0 | 0 | 0 | 0 | 1 | 0 | 0 | 0 |
| 0 | 1 | 0 | 0 | 0 | 0 | 0 | 1 | 2 | 0 | 0 |
| 0 | 0 | 0 | 0 | 0 | 0 | 0 | 2 | 1 | 0 | 0 |
| 0 | 0 | 0 | 0 | 0 | 0 | 1 | 0 | 1 | 1 | 0 |
| 0 | 0 | 0 | 0 | 0 | 0 | 0 | 1 | 0 | 0 | 0 |
| 0 | 1 | 0 | 0 | 0 | 0 | 0 | 2 | 0 | 0 | 0 |
| 0 | 0 | 0 | 0 | 0 | 0 | 0 | 0 | 1 | 0 | 0 |
| 0 | 0 | 0 | 0 | 0 | 0 | 0 | 0 | 0 | 0 | 0 |
| 0 | 0 | 0 | 0 | 0 | 0 | 0 | 1 | 0 | 0 | 0 |
| 0 | 1 | 0 | 0 | 0 | 0 | 0 | 4 | 0 | 0 | 0 |
| 0 | 0 | 0 | 0 | 0 | 0 | 0 | 1 | 0 | 0 | 0 |







|   |   |   |   |   |   |    |   |   |   |   |
|---|---|---|---|---|---|----|---|---|---|---|
| 0 | 0 | 0 | 0 | 0 | 0 | 1  | 1 | 0 | 0 | 0 |
| 0 | 0 | 0 | 0 | 0 | 0 | 5  | 0 | 0 | 0 | 0 |
| 0 | 0 | 0 | 0 | 0 | 0 | 13 | 0 | 0 | 0 | 0 |
| 0 | 0 | 0 | 0 | 0 | 0 | 10 | 0 | 0 | 0 | 0 |
| 0 | 0 | 0 | 0 | 0 | 0 | 1  | 0 | 0 | 0 | 0 |
| 0 | 0 | 0 | 0 | 0 | 0 | 1  | 0 | 0 | 0 | 0 |
| 0 | 0 | 0 | 0 | 0 | 0 | 0  | 0 | 0 | 0 | 0 |
| 0 | 0 | 0 | 0 | 0 | 0 | 1  | 0 | 0 | 0 | 0 |
| 0 | 0 | 0 | 0 | 0 | 0 | 0  | 0 | 0 | 0 | 0 |
| 0 | 0 | 0 | 0 | 0 | 0 | 0  | 0 | 0 | 0 | 0 |
| 0 | 0 | 0 | 0 | 0 | 0 | 0  | 0 | 0 | 0 | 0 |
| 0 | 0 | 0 | 0 | 0 | 0 | 0  | 0 | 0 | 0 | 0 |
| 0 | 0 | 0 | 0 | 0 | 0 | 0  | 0 | 0 | 0 | 0 |
| 0 | 0 | 0 | 0 | 0 | 0 | 0  | 0 | 0 | 0 | 0 |
| 0 | 0 | 0 | 0 | 0 | 0 | 0  | 0 | 0 | 0 | 0 |
| 0 | 0 | 0 | 0 | 0 | 1 | 0  | 0 | 0 | 0 | 0 |
| 0 | 0 | 0 | 0 | 0 | 0 | 0  | 0 | 0 | 0 | 0 |
| 0 | 0 | 0 | 0 | 0 | 0 | 0  | 0 | 0 | 0 | 0 |
| 0 | 0 | 0 | 0 | 0 | 0 | 0  | 0 | 0 | 0 | 0 |
| 0 | 0 | 0 | 0 | 0 | 0 | 0  | 0 | 0 | 0 | 0 |
| 0 | 0 | 0 | 0 | 0 | 0 | 0  | 0 | 0 | 0 | 0 |
| 0 | 0 | 0 | 0 | 0 | 0 | 0  | 0 | 0 | 0 | 0 |
| 0 | 0 | 0 | 0 | 0 | 0 | 0  | 0 | 0 | 0 | 0 |
| 0 | 0 | 0 | 0 | 0 | 0 | 2  | 0 | 0 | 0 | 0 |
| 0 | 0 | 0 | 0 | 0 | 0 | 1  | 0 | 2 | 0 | 0 |
| 0 | 0 | 0 | 0 | 0 | 0 | 0  | 0 | 0 | 0 | 0 |
| 0 | 0 | 0 | 0 | 0 | 0 | 3  | 0 | 0 | 0 | 0 |
| 0 | 0 | 0 | 0 | 0 | 0 | 1  | 0 | 0 | 0 | 0 |
| 0 | 0 | 0 | 0 | 0 | 0 | 0  | 0 | 0 | 0 | 0 |
| 0 | 0 | 0 | 0 | 0 | 0 | 0  | 0 | 2 | 0 | 0 |
| 0 | 0 | 0 | 0 | 0 | 0 | 3  | 0 | 0 | 0 | 0 |

|   |   |   |   |   |   |   |   |   |   |   |
|---|---|---|---|---|---|---|---|---|---|---|
| 0 | 0 | 0 | 0 | 0 | 0 | 1 | 1 | 1 | 0 | 0 |
| 0 | 0 | 0 | 0 | 0 | 0 | 0 | 0 | 0 | 0 | 0 |
| 0 | 0 | 0 | 0 | 0 | 0 | 0 | 0 | 1 | 0 | 0 |
| 0 | 0 | 0 | 0 | 0 | 0 | 0 | 0 | 0 | 0 | 0 |
| 0 | 0 | 0 | 0 | 0 | 0 | 0 | 0 | 1 | 0 | 0 |
| 0 | 0 | 0 | 0 | 0 | 0 | 0 | 0 | 1 | 0 | 0 |
| 0 | 0 | 0 | 0 | 0 | 0 | 3 | 0 | 0 | 0 | 2 |
| 0 | 0 | 0 | 0 | 0 | 0 | 3 | 0 | 0 | 0 | 0 |
| 0 | 0 | 0 | 0 | 0 | 0 | 1 | 0 | 0 | 0 | 0 |
| 0 | 0 | 0 | 0 | 0 | 0 | 0 | 1 | 1 | 0 | 0 |
| 0 | 0 | 0 | 0 | 0 | 0 | 1 | 0 | 0 | 0 | 0 |
| 0 | 0 | 0 | 0 | 0 | 0 | 1 | 1 | 2 | 0 | 0 |
| 0 | 0 | 0 | 0 | 0 | 0 | 0 | 0 | 0 | 0 | 0 |
| 0 | 0 | 0 | 0 | 0 | 0 | 0 | 0 | 0 | 0 | 0 |
| 0 | 0 | 0 | 0 | 0 | 0 | 1 | 0 | 0 | 0 | 0 |
| 0 | 0 | 0 | 0 | 0 | 0 | 0 | 0 | 2 | 0 | 0 |
| 0 | 0 | 0 | 0 | 0 | 0 | 0 | 0 | 1 | 0 | 0 |
| 0 | 0 | 0 | 0 | 0 | 0 | 2 | 0 | 0 | 0 | 0 |
| 0 | 0 | 0 | 0 | 0 | 0 | 0 | 0 | 4 | 0 | 0 |
| 0 | 0 | 0 | 0 | 0 | 0 | 0 | 1 | 0 | 0 | 0 |
| 0 | 0 | 0 | 0 | 0 | 0 | 5 | 0 | 0 | 0 | 0 |
| 0 | 0 | 0 | 0 | 0 | 0 | 0 | 0 | 1 | 0 | 0 |
| 0 | 0 | 0 | 0 | 0 | 0 | 2 | 0 | 0 | 0 | 0 |
| 0 | 0 | 0 | 0 | 0 | 0 | 0 | 0 | 0 | 0 | 0 |
| 0 | 0 | 0 | 0 | 0 | 0 | 0 | 0 | 0 | 0 | 0 |
| 0 | 0 | 0 | 0 | 0 | 0 | 0 | 0 | 1 | 0 | 0 |
| 0 | 0 | 0 | 0 | 0 | 0 | 0 | 0 | 1 | 0 | 0 |
| 0 | 0 | 0 | 0 | 0 | 0 | 2 | 1 | 2 | 0 | 0 |
| 0 | 0 | 0 | 0 | 0 | 0 | 0 | 0 | 0 | 0 | 0 |
| 0 | 0 | 0 | 0 | 0 | 0 | 4 | 0 | 0 | 0 | 0 |

|   |   |   |   |   |   |    |   |   |   |   |
|---|---|---|---|---|---|----|---|---|---|---|
| 0 | 0 | 0 | 0 | 0 | 0 | 17 | 0 | 0 | 0 | 0 |
| 0 | 0 | 0 | 0 | 0 | 0 | 0  | 0 | 0 | 0 | 0 |
| 0 | 0 | 0 | 0 | 0 | 0 | 59 | 0 | 0 | 0 | 0 |
| 0 | 0 | 0 | 0 | 0 | 0 | 39 | 0 | 0 | 0 | 0 |
| 0 | 0 | 0 | 0 | 0 | 0 | 0  | 0 | 0 | 0 | 0 |
| 0 | 1 | 0 | 0 | 0 | 0 | 0  | 0 | 0 | 0 | 0 |
| 0 | 0 | 0 | 0 | 0 | 0 | 0  | 0 | 0 | 0 | 0 |
| 0 | 0 | 0 | 0 | 1 | 0 | 0  | 0 | 0 | 0 | 0 |
| 0 | 0 | 0 | 0 | 0 | 0 | 0  | 0 | 0 | 0 | 0 |
| 0 | 0 | 0 | 0 | 0 | 0 | 22 | 0 | 1 | 0 | 0 |
| 0 | 0 | 0 | 0 | 0 | 0 | 0  | 0 | 0 | 0 | 0 |
| 0 | 0 | 0 | 0 | 0 | 0 | 0  | 0 | 0 | 0 | 0 |
| 0 | 0 | 0 | 0 | 0 | 0 | 1  | 0 | 2 | 0 | 0 |
| 0 | 0 | 0 | 0 | 0 | 0 | 0  | 0 | 2 | 0 | 0 |
| 0 | 1 | 0 | 0 | 0 | 0 | 0  | 0 | 0 | 0 | 0 |
| 0 | 0 | 0 | 0 | 0 | 0 | 0  | 0 | 1 | 0 | 0 |
| 0 | 0 | 0 | 0 | 0 | 0 | 0  | 0 | 0 | 0 | 0 |
| 0 | 0 | 0 | 0 | 0 | 0 | 1  | 0 | 0 | 0 | 0 |
| 0 | 0 | 0 | 0 | 0 | 0 | 0  | 0 | 0 | 0 | 0 |
| 0 | 0 | 0 | 0 | 0 | 0 | 0  | 0 | 0 | 0 | 0 |
| 0 | 0 | 0 | 0 | 0 | 0 | 0  | 0 | 1 | 0 | 0 |
| 0 | 0 | 0 | 0 | 0 | 0 | 1  | 0 | 0 | 0 | 0 |
| 0 | 0 | 0 | 0 | 0 | 0 | 21 | 0 | 0 | 0 | 0 |
| 0 | 0 | 0 | 0 | 0 | 0 | 22 | 0 | 0 | 0 | 0 |
| 0 | 0 | 0 | 1 | 1 | 0 | 86 | 0 | 0 | 0 | 0 |
| 0 | 0 | 0 | 0 | 0 | 0 | 5  | 0 | 3 | 0 | 0 |
| 0 | 0 | 0 | 0 | 0 | 0 | 3  | 0 | 4 | 0 | 0 |
| 0 | 0 | 0 | 0 | 2 | 0 | 4  | 0 | 4 | 0 | 0 |
| 0 | 0 | 0 | 0 | 0 | 0 | 2  | 0 | 0 | 0 | 0 |













|   |   |   |   |   |   |   |   |   |   |   |
|---|---|---|---|---|---|---|---|---|---|---|
| 0 | 0 | 0 | 0 | 0 | 0 | 0 | 0 | 0 | 0 | 0 |
| 0 | 0 | 0 | 0 | 0 | 0 | 2 | 0 | 0 | 0 | 0 |
| 0 | 0 | 0 | 0 | 0 | 0 | 0 | 0 | 0 | 0 | 0 |
| 0 | 0 | 0 | 0 | 0 | 0 | 0 | 0 | 0 | 0 | 0 |
| 0 | 0 | 0 | 0 | 0 | 0 | 0 | 0 | 0 | 0 | 0 |
| 0 | 0 | 0 | 0 | 0 | 0 | 0 | 0 | 0 | 0 | 0 |
| 0 | 0 | 0 | 0 | 0 | 0 | 2 | 0 | 0 | 0 | 0 |
| 0 | 0 | 0 | 0 | 0 | 0 | 1 | 0 | 0 | 0 | 0 |
| 0 | 0 | 0 | 0 | 0 | 0 | 1 | 0 | 0 | 0 | 0 |
| 0 | 0 | 0 | 0 | 0 | 0 | 0 | 0 | 0 | 0 | 0 |
| 0 | 0 | 0 | 0 | 0 | 0 | 0 | 0 | 0 | 0 | 1 |
| 0 | 0 | 0 | 0 | 0 | 0 | 0 | 0 | 0 | 0 | 1 |
| 0 | 0 | 0 | 0 | 0 | 0 | 1 | 0 | 1 | 0 | 0 |
| 0 | 0 | 0 | 0 | 0 | 0 | 1 | 0 | 0 | 0 | 0 |
| 0 | 0 | 0 | 0 | 0 | 0 | 9 | 0 | 0 | 0 | 0 |
| 0 | 0 | 0 | 0 | 0 | 0 | 5 | 0 | 0 | 0 | 0 |
| 0 | 0 | 0 | 0 | 0 | 0 | 7 | 0 | 0 | 0 | 0 |
| 0 | 0 | 0 | 0 | 0 | 0 | 2 | 0 | 0 | 0 | 0 |
| 0 | 0 | 0 | 0 | 0 | 0 | 0 | 0 | 3 | 0 | 0 |
| 0 | 0 | 0 | 0 | 0 | 0 | 0 | 0 | 0 | 0 | 0 |
| 0 | 0 | 0 | 0 | 0 | 0 | 9 | 0 | 0 | 0 | 0 |
| 0 | 0 | 0 | 0 | 0 | 0 | 1 | 0 | 1 | 0 | 0 |
| 0 | 0 | 0 | 0 | 0 | 0 | 0 | 0 | 1 | 0 | 0 |
| 0 | 0 | 0 | 0 | 0 | 0 | 0 | 0 | 1 | 0 | 0 |
| 0 | 0 | 1 | 0 | 0 | 0 | 1 | 0 | 0 | 0 | 0 |
| 2 | 0 | 0 | 0 | 0 | 0 | 4 | 0 | 0 | 0 | 0 |
| 0 | 0 | 0 | 0 | 0 | 0 | 0 | 0 | 0 | 0 | 0 |
| 0 | 0 | 0 | 0 | 0 | 0 | 4 | 0 | 0 | 0 | 0 |

|   |   |   |   |   |   |    |   |   |   |   |
|---|---|---|---|---|---|----|---|---|---|---|
| 0 | 0 | 0 | 0 | 0 | 0 | 0  | 0 | 0 | 0 | 0 |
| 0 | 0 | 0 | 0 | 0 | 0 | 24 | 1 | 0 | 0 | 0 |
| 0 | 0 | 0 | 0 | 0 | 0 | 6  | 0 | 0 | 0 | 0 |
| 1 | 0 | 0 | 0 | 0 | 0 | 33 | 0 | 0 | 0 | 0 |
| 0 | 0 | 0 | 0 | 0 | 0 | 30 | 0 | 0 | 0 | 0 |
| 0 | 0 | 0 | 0 | 0 | 0 | 8  | 1 | 0 | 0 | 0 |
| 0 | 0 | 0 | 0 | 0 | 0 | 2  | 0 | 0 | 0 | 0 |
| 0 | 0 | 0 | 0 | 0 | 0 | 2  | 0 | 0 | 0 | 0 |
| 0 | 0 | 0 | 0 | 0 | 0 | 6  | 0 | 0 | 0 | 0 |
| 0 | 0 | 0 | 0 | 0 | 0 | 17 | 0 | 0 | 0 | 0 |
| 0 | 0 | 0 | 0 | 0 | 0 | 11 | 0 | 0 | 0 | 0 |
| 0 | 0 | 0 | 0 | 0 | 0 | 10 | 1 | 0 | 0 | 0 |
| 0 | 0 | 0 | 0 | 0 | 0 | 18 | 0 | 0 | 0 | 0 |
| 0 | 0 | 0 | 0 | 0 | 0 | 6  | 0 | 0 | 0 | 0 |
| 2 | 0 | 0 | 0 | 0 | 0 | 9  | 0 | 0 | 0 | 0 |
| 0 | 0 | 0 | 0 | 0 | 0 | 9  | 0 | 0 | 0 | 0 |
| 0 | 0 | 0 | 0 | 0 | 0 | 8  | 0 | 0 | 0 | 0 |
| 0 | 0 | 0 | 0 | 0 | 0 | 12 | 0 | 0 | 0 | 0 |
| 0 | 0 | 0 | 0 | 0 | 0 | 14 | 0 | 0 | 0 | 0 |
| 0 | 0 | 0 | 0 | 0 | 0 | 3  | 0 | 0 | 0 | 0 |
| 0 | 0 | 0 | 0 | 0 | 0 | 3  | 0 | 0 | 0 | 0 |
| 0 | 0 | 0 | 0 | 0 | 0 | 14 | 0 | 0 | 0 | 0 |
| 0 | 0 | 0 | 0 | 0 | 0 | 1  | 0 | 0 | 0 | 0 |
| 0 | 0 | 0 | 0 | 0 | 0 | 31 | 0 | 0 | 0 | 0 |
| 0 | 0 | 0 | 0 | 0 | 0 | 23 | 0 | 0 | 0 | 0 |
| 0 | 0 | 0 | 0 | 0 | 0 | 6  | 0 | 0 | 0 | 0 |
| 0 | 0 | 0 | 0 | 0 | 0 | 11 | 0 | 0 | 0 | 0 |
| 0 | 0 | 0 | 0 | 0 | 0 | 6  | 0 | 0 | 0 | 0 |
| 0 | 0 | 0 | 0 | 0 | 0 | 1  | 0 | 0 | 0 | 0 |





|   |   |   |   |   |   |   |   |   |   |   |
|---|---|---|---|---|---|---|---|---|---|---|
| 0 | 0 | 0 | 0 | 0 | 0 | 0 | 0 | 0 | 0 | 0 |
| 0 | 0 | 0 | 0 | 0 | 0 | 0 | 0 | 0 | 0 | 0 |
| 0 | 0 | 0 | 0 | 0 | 0 | 0 | 0 | 0 | 0 | 0 |
| 0 | 0 | 0 | 0 | 0 | 0 | 0 | 0 | 0 | 0 | 0 |
| 0 | 0 | 0 | 0 | 0 | 0 | 0 | 0 | 0 | 0 | 0 |
| 0 | 0 | 0 | 0 | 0 | 0 | 0 | 0 | 0 | 0 | 0 |
| 0 | 0 | 0 | 0 | 0 | 0 | 0 | 0 | 0 | 0 | 0 |
| 0 | 0 | 0 | 0 | 0 | 0 | 0 | 0 | 0 | 0 | 0 |
| 0 | 0 | 0 | 0 | 0 | 0 | 0 | 0 | 0 | 0 | 0 |
| 0 | 0 | 0 | 0 | 0 | 0 | 0 | 0 | 0 | 0 | 0 |
| 0 | 0 | 0 | 0 | 0 | 0 | 0 | 0 | 0 | 0 | 0 |
| 0 | 0 | 0 | 0 | 0 | 0 | 0 | 0 | 0 | 0 | 0 |
| 0 | 0 | 0 | 0 | 0 | 0 | 0 | 0 | 0 | 0 | 0 |
| 0 | 0 | 0 | 0 | 0 | 0 | 0 | 0 | 0 | 0 | 0 |
| 0 | 0 | 0 | 0 | 0 | 0 | 0 | 0 | 0 | 0 | 0 |
| 0 | 0 | 0 | 0 | 0 | 0 | 0 | 0 | 0 | 0 | 0 |
| 0 | 0 | 0 | 0 | 0 | 0 | 0 | 0 | 0 | 0 | 0 |
| 0 | 0 | 0 | 0 | 0 | 0 | 0 | 0 | 0 | 0 | 0 |
| 0 | 0 | 0 | 0 | 0 | 0 | 0 | 0 | 0 | 0 | 0 |
| 0 | 0 | 0 | 0 | 0 | 0 | 0 | 0 | 0 | 0 | 0 |
| 0 | 0 | 0 | 0 | 0 | 0 | 0 | 0 | 0 | 0 | 0 |
| 0 | 0 | 0 | 0 | 0 | 0 | 0 | 0 | 0 | 0 | 0 |
| 0 | 0 | 0 | 0 | 0 | 0 | 0 | 0 | 3 | 0 | 0 |
| 0 | 0 | 0 | 0 | 0 | 0 | 0 | 0 | 0 | 0 | 0 |
| 0 | 0 | 0 | 0 | 0 | 0 | 0 | 0 | 0 | 0 | 0 |
| 0 | 0 | 0 | 0 | 0 | 0 | 0 | 0 | 1 | 0 | 0 |
| 0 | 0 | 0 | 0 | 0 | 0 | 0 | 0 | 1 | 0 | 0 |
| 0 | 0 | 0 | 0 | 0 | 0 | 0 | 0 | 0 | 0 | 0 |
| 0 | 0 | 0 | 0 | 0 | 0 | 0 | 0 | 1 | 0 | 0 |
| 0 | 0 | 0 | 0 | 0 | 0 | 0 | 0 | 0 | 0 | 0 |
| 0 | 0 | 0 | 0 | 0 | 0 | 0 | 0 | 1 | 0 | 0 |

| diopat | dorvil | eteone | eunice | exochi | exogon | exoobt | exopla | exowai | flatwo | glycer |   |
|--------|--------|--------|--------|--------|--------|--------|--------|--------|--------|--------|---|
| 0      | 0      | 0      | 0      | 0      | 0      | 0      | 0      | 0      | 0      | 0      | 0 |
| 0      | 0      | 0      | 0      | 0      | 0      | 0      | 0      | 0      | 0      | 0      | 0 |
| 0      | 0      | 0      | 0      | 0      | 0      | 0      | 0      | 0      | 0      | 0      | 0 |
| 0      | 0      | 0      | 0      | 0      | 0      | 0      | 0      | 0      | 1      | 0      | 0 |















|   |   |   |   |   |   |   |   |   |   |   |
|---|---|---|---|---|---|---|---|---|---|---|
| 0 | 0 | 0 | 0 | 0 | 0 | 0 | 0 | 0 | 0 | 1 |
| 0 | 0 | 0 | 0 | 0 | 0 | 0 | 0 | 0 | 0 | 0 |
| 0 | 0 | 0 | 0 | 0 | 0 | 0 | 0 | 0 | 0 | 0 |
| 0 | 0 | 0 | 0 | 0 | 0 | 0 | 0 | 0 | 0 | 0 |
| 0 | 0 | 0 | 0 | 0 | 0 | 0 | 0 | 0 | 0 | 0 |
| 0 | 0 | 0 | 0 | 0 | 0 | 0 | 0 | 0 | 0 | 0 |
| 0 | 0 | 0 | 0 | 0 | 0 | 0 | 0 | 0 | 0 | 1 |
| 0 | 0 | 0 | 0 | 0 | 0 | 0 | 0 | 0 | 0 | 1 |
| 0 | 0 | 0 | 0 | 0 | 0 | 0 | 0 | 0 | 0 | 0 |
| 0 | 0 | 0 | 0 | 0 | 0 | 0 | 0 | 0 | 0 | 0 |
| 0 | 0 | 0 | 0 | 1 | 0 | 0 | 0 | 0 | 0 | 0 |
| 0 | 0 | 0 | 0 | 0 | 0 | 0 | 0 | 0 | 0 | 0 |
| 0 | 0 | 0 | 0 | 0 | 0 | 0 | 0 | 0 | 0 | 0 |
| 0 | 0 | 0 | 0 | 0 | 0 | 0 | 0 | 0 | 0 | 0 |
| 0 | 0 | 0 | 0 | 0 | 0 | 0 | 0 | 0 | 0 | 0 |
| 0 | 0 | 0 | 0 | 0 | 0 | 0 | 0 | 0 | 0 | 0 |
| 0 | 0 | 0 | 0 | 0 | 0 | 0 | 0 | 0 | 0 | 0 |
| 0 | 0 | 0 | 0 | 0 | 0 | 0 | 0 | 0 | 0 | 0 |
| 0 | 0 | 0 | 0 | 0 | 0 | 0 | 0 | 0 | 0 | 0 |
| 0 | 0 | 0 | 0 | 0 | 0 | 0 | 0 | 0 | 0 | 0 |
| 0 | 0 | 0 | 0 | 0 | 0 | 0 | 0 | 0 | 0 | 0 |
| 0 | 0 | 0 | 0 | 0 | 0 | 0 | 0 | 0 | 0 | 0 |
| 0 | 0 | 0 | 0 | 0 | 0 | 0 | 0 | 0 | 0 | 0 |
| 0 | 0 | 0 | 0 | 0 | 0 | 0 | 0 | 0 | 0 | 0 |
| 0 | 0 | 0 | 0 | 0 | 0 | 0 | 0 | 0 | 0 | 0 |
| 0 | 0 | 0 | 0 | 0 | 0 | 0 | 0 | 0 | 0 | 0 |
| 0 | 0 | 0 | 0 | 1 | 0 | 0 | 0 | 0 | 0 | 0 |















|   |   |   |   |   |   |   |   |   |   |   |   |
|---|---|---|---|---|---|---|---|---|---|---|---|
| 0 | 0 | 0 | 0 | 0 | 0 | 0 | 0 | 0 | 0 | 0 | 1 |
| 0 | 0 | 0 | 0 | 0 | 0 | 0 | 0 | 1 | 0 | 0 | 1 |
| 0 | 0 | 0 | 0 | 0 | 0 | 0 | 0 | 0 | 0 | 0 | 1 |
| 0 | 0 | 0 | 1 | 0 | 0 | 0 | 0 | 0 | 0 | 0 | 0 |
| 0 | 0 | 0 | 0 | 0 | 0 | 0 | 0 | 0 | 0 | 0 | 0 |
| 0 | 0 | 0 | 0 | 0 | 0 | 0 | 0 | 0 | 0 | 0 | 0 |
| 0 | 0 | 0 | 0 | 0 | 0 | 0 | 0 | 0 | 0 | 0 | 0 |
| 0 | 0 | 0 | 0 | 0 | 0 | 0 | 0 | 0 | 0 | 0 | 0 |
| 0 | 0 | 0 | 0 | 0 | 0 | 0 | 0 | 0 | 0 | 1 | 0 |
| 0 | 0 | 0 | 0 | 0 | 0 | 0 | 0 | 0 | 0 | 0 | 0 |
| 0 | 0 | 0 | 0 | 1 | 0 | 0 | 0 | 0 | 0 | 0 | 1 |
| 0 | 0 | 0 | 0 | 0 | 0 | 0 | 0 | 0 | 0 | 0 | 0 |
| 0 | 0 | 0 | 0 | 0 | 0 | 0 | 0 | 0 | 0 | 0 | 0 |
| 0 | 0 | 0 | 0 | 0 | 0 | 0 | 0 | 0 | 0 | 0 | 0 |
| 0 | 0 | 0 | 0 | 0 | 0 | 0 | 0 | 0 | 0 | 0 | 0 |
| 0 | 0 | 0 | 0 | 0 | 0 | 0 | 0 | 0 | 0 | 0 | 0 |
| 0 | 0 | 0 | 0 | 0 | 0 | 0 | 0 | 0 | 0 | 0 | 0 |
| 0 | 0 | 0 | 0 | 0 | 0 | 0 | 0 | 0 | 0 | 0 | 0 |
| 0 | 0 | 0 | 0 | 0 | 0 | 0 | 0 | 0 | 0 | 0 | 0 |
| 0 | 0 | 0 | 0 | 0 | 0 | 0 | 0 | 0 | 0 | 0 | 0 |
| 0 | 0 | 0 | 0 | 0 | 0 | 0 | 0 | 0 | 0 | 0 | 0 |

| hemhir | hetfil | laspar | levgra | lumbri | lysian | maclil | macste | magdak | melawa | methal |
|--------|--------|--------|--------|--------|--------|--------|--------|--------|--------|--------|
| 0      | 3      | 1      | 0      | 0      | 0      | 0      | 0      | 0      | 0      | 0      |
| 0      | 0      | 4      | 0      | 3      | 22     | 5      | 0      | 0      | 0      | 0      |
| 0      | 0      | 0      | 0      | 0      | 0      | 2      | 0      | 0      | 0      | 0      |
| 0      | 2      | 7      | 0      | 0      | 5      | 0      | 0      | 0      | 0      | 0      |
| 0      | 0      | 6      | 0      | 5      | 7      | 3      | 0      | 0      | 0      | 0      |
| 0      | 0      | 1      | 0      | 1      | 12     | 4      | 0      | 0      | 0      | 0      |
| 0      | 1      | 2      | 0      | 1      | 2      | 4      | 0      | 0      | 0      | 0      |
| 0      | 2      | 4      | 0      | 0      | 9      | 10     | 0      | 0      | 0      | 0      |

|   |   |   |   |    |    |   |   |   |   |   |
|---|---|---|---|----|----|---|---|---|---|---|
| 0 | 2 | 0 | 0 | 0  | 6  | 4 | 0 | 0 | 0 | 0 |
| 0 | 0 | 0 | 0 | 2  | 25 | 4 | 0 | 0 | 0 | 0 |
| 0 | 0 | 0 | 0 | 0  | 2  | 3 | 0 | 0 | 0 | 0 |
| 0 | 4 | 1 | 0 | 0  | 16 | 4 | 1 | 0 | 0 | 0 |
| 0 | 3 | 1 | 0 | 5  | 16 | 3 | 0 | 0 | 0 | 0 |
| 0 | 1 | 1 | 0 | 0  | 6  | 7 | 1 | 0 | 0 | 0 |
| 0 | 3 | 0 | 0 | 0  | 4  | 3 | 0 | 0 | 0 | 0 |
| 0 | 7 | 1 | 0 | 0  | 1  | 1 | 0 | 0 | 1 | 0 |
| 0 | 0 | 0 | 0 | 0  | 0  | 2 | 0 | 0 | 0 | 0 |
| 0 | 3 | 1 | 0 | 0  | 0  | 9 | 0 | 0 | 0 | 0 |
| 1 | 6 | 0 | 0 | 0  | 0  | 6 | 1 | 0 | 1 | 0 |
| 0 | 7 | 2 | 0 | 0  | 31 | 9 | 0 | 0 | 0 | 0 |
| 0 | 0 | 0 | 0 | 4  | 4  | 2 | 0 | 0 | 0 | 0 |
| 0 | 0 | 2 | 1 | 0  | 2  | 1 | 0 | 0 | 0 | 0 |
| 0 | 0 | 6 | 0 | 10 | 30 | 4 | 0 | 0 | 0 | 0 |
| 0 | 0 | 1 | 0 | 8  | 18 | 0 | 0 | 0 | 0 | 0 |
| 0 | 0 | 0 | 0 | 3  | 10 | 4 | 0 | 0 | 0 | 0 |
| 0 | 0 | 0 | 0 | 0  | 2  | 2 | 0 | 0 | 0 | 0 |
| 1 | 0 | 0 | 0 | 1  | 7  | 3 | 0 | 0 | 0 | 0 |
| 0 | 0 | 2 | 0 | 1  | 7  | 1 | 0 | 0 | 0 | 0 |
| 0 | 0 | 0 | 0 | 0  | 0  | 4 | 0 | 0 | 0 | 0 |
| 0 | 0 | 1 | 0 | 0  | 1  | 1 | 0 | 0 | 0 | 0 |
| 0 | 1 | 4 | 0 | 0  | 6  | 4 | 0 | 0 | 0 | 0 |
| 0 | 0 | 3 | 0 | 0  | 0  | 2 | 0 | 0 | 0 | 0 |
| 0 | 0 | 3 | 0 | 5  | 2  | 1 | 0 | 0 | 0 | 0 |
| 0 | 0 | 1 | 0 | 10 | 3  | 4 | 0 | 0 | 0 | 0 |
| 0 | 0 | 0 | 0 | 0  | 0  | 1 | 0 | 0 | 0 | 0 |
| 0 | 0 | 2 | 0 | 0  | 6  | 6 | 0 | 0 | 0 | 0 |
| 0 | 0 | 0 | 0 | 0  | 2  | 1 | 0 | 0 | 0 | 0 |





|   |   |   |
|---|---|---|
| 0 | 0 | 0 |
| 0 | 1 | 0 |
| 0 | 2 | 0 |
| 0 | 1 | 3 |
| 0 | 2 | 1 |
| 0 | 0 | 0 |
| 0 | 0 | 1 |
| 0 | 3 | 0 |
| 0 | 2 | 0 |
| 0 | 3 | 0 |
| 0 | 8 | 1 |
| 0 | 8 | 4 |
| 0 | 5 | 0 |
| 0 | 2 | 1 |
| 0 | 1 | 2 |
| 0 | 1 | 1 |
| 0 | 1 | 0 |
| 0 | 2 | 1 |
| 0 | 3 | 2 |
| 0 | 3 | 0 |
| 0 | 2 | 0 |
| 0 | 1 | 1 |
| 0 | 1 | 2 |
| 0 | 1 | 0 |
| 0 | 0 | 0 |
| 0 | 2 | 0 |
| 0 | 0 | 1 |
| 0 | 1 | 0 |
| 0 | 0 | 0 |

|   |   |    |    |   |   |   |   |
|---|---|----|----|---|---|---|---|
| 0 | 1 | 3  | 4  | 2 | 0 | 0 | 0 |
| 0 | 1 | 9  | 7  | 0 | 0 | 0 | 0 |
| 0 | 0 | 7  | 6  | 0 | 0 | 0 | 0 |
| 0 | 0 | 8  | 4  | 1 | 0 | 0 | 0 |
| 0 | 0 | 2  | 1  | 0 | 0 | 0 | 0 |
| 0 | 0 | 0  | 4  | 4 | 1 | 0 | 0 |
| 0 | 0 | 1  | 6  | 0 | 0 | 0 | 0 |
| 0 | 0 | 1  | 7  | 2 | 3 | 0 | 0 |
| 0 | 0 | 3  | 6  | 1 | 0 | 0 | 0 |
| 0 | 0 | 3  | 4  | 0 | 0 | 0 | 0 |
| 0 | 0 | 4  | 9  | 0 | 0 | 0 | 0 |
| 0 | 0 | 2  | 5  | 0 | 0 | 0 | 0 |
| 0 | 0 | 0  | 2  | 0 | 0 | 0 | 0 |
| 0 | 0 | 2  | 2  | 0 | 0 | 0 | 0 |
| 0 | 0 | 0  | 3  | 2 | 0 | 0 | 0 |
| 0 | 0 | 1  | 3  | 1 | 0 | 0 | 0 |
| 0 | 0 | 3  | 6  | 0 | 0 | 0 | 0 |
| 0 | 0 | 0  | 0  | 1 | 0 | 0 | 0 |
| 0 | 0 | 0  | 1  | 0 | 0 | 0 | 0 |
| 0 | 0 | 0  | 3  | 0 | 0 | 0 | 0 |
| 0 | 0 | 6  | 2  | 0 | 0 | 0 | 0 |
| 0 | 0 | 5  | 8  | 2 | 0 | 0 | 0 |
| 0 | 0 | 8  | 10 | 0 | 0 | 0 | 0 |
| 0 | 0 | 2  | 4  | 0 | 0 | 0 | 0 |
| 0 | 0 | 6  | 7  | 1 | 0 | 0 | 0 |
| 0 | 0 | 6  | 5  | 0 | 0 | 0 | 0 |
| 0 | 0 | 14 | 4  | 0 | 0 | 0 | 0 |
| 0 | 0 | 25 | 6  | 0 | 0 | 0 | 0 |
| 0 | 0 | 4  | 4  | 0 | 0 | 0 | 0 |















|   |   |   |   |   |    |   |   |   |   |
|---|---|---|---|---|----|---|---|---|---|
| 0 | 1 | 0 | 0 | 0 | 7  | 6 | 0 | 0 | 0 |
| 0 | 1 | 0 | 0 | 0 | 8  | 3 | 2 | 0 | 0 |
| 0 | 3 | 0 | 0 | 0 | 2  | 1 | 0 | 0 | 0 |
| 0 | 5 | 2 | 0 | 0 | 5  | 1 | 1 | 0 | 0 |
| 0 | 1 | 0 | 0 | 0 | 4  | 7 | 1 | 0 | 0 |
| 0 | 5 | 0 | 0 | 0 | 0  | 6 | 0 | 0 | 1 |
| 0 | 1 | 0 | 0 | 0 | 5  | 2 | 2 | 0 | 0 |
| 0 | 4 | 0 | 0 | 0 | 15 | 8 | 0 | 0 | 0 |
| 0 | 6 | 0 | 0 | 0 | 6  | 7 | 1 | 0 | 0 |
| 0 | 8 | 1 | 0 | 0 | 12 | 0 | 0 | 0 | 0 |
| 0 | 1 | 1 | 0 | 0 | 4  | 3 | 1 | 0 | 0 |
| 0 | 2 | 0 | 0 | 0 | 2  | 3 | 1 | 0 | 0 |
| 0 | 0 | 0 | 0 | 0 | 5  | 5 | 1 | 0 | 0 |
| 0 | 2 | 3 | 0 | 6 | 33 | 2 | 2 | 1 | 0 |
| 0 | 2 | 0 | 0 | 0 | 6  | 4 | 2 | 0 | 0 |
| 0 | 6 | 0 | 0 | 0 | 8  | 3 | 1 | 0 | 0 |
| 0 | 0 | 1 | 0 | 0 | 6  | 2 | 0 | 0 | 0 |
| 0 | 0 | 3 | 0 | 0 | 18 | 1 | 0 | 0 | 0 |
| 0 | 0 | 1 | 0 | 0 | 8  | 5 | 0 | 0 | 0 |
| 0 | 0 | 3 | 0 | 0 | 0  | 4 | 0 | 0 | 0 |
| 0 | 5 | 1 | 0 | 0 | 10 | 3 | 1 | 0 | 0 |
| 0 | 2 | 3 | 0 | 4 | 7  | 4 | 0 | 1 | 0 |
| 0 | 0 | 1 | 0 | 2 | 28 | 2 | 1 | 0 | 0 |
| 0 | 0 | 1 | 0 | 6 | 11 | 6 | 0 | 0 | 0 |
| 0 | 2 | 2 | 0 | 8 | 14 | 6 | 0 | 0 | 0 |
| 0 | 5 | 1 | 0 | 6 | 22 | 4 | 0 | 0 | 0 |
| 0 | 0 | 2 | 0 | 2 | 8  | 6 | 0 | 0 | 0 |
| 0 | 4 | 0 | 0 | 1 | 13 | 7 | 0 | 0 | 0 |
| 0 | 4 | 0 | 0 | 3 | 9  | 4 | 0 | 0 | 0 |

|   |   |   |
|---|---|---|
| 0 | 2 | 0 |
| 0 | 2 | 0 |
| 0 | 1 | 2 |
| 0 | 0 | 1 |
| 0 | 1 | 2 |
| 0 | 0 | 2 |
| 1 | 2 | 1 |
| 0 | 1 | 3 |
| 0 | 1 | 0 |
| 0 | 0 | 2 |
| 0 | 0 | 1 |
| 0 | 0 | 1 |
| 0 | 0 | 2 |
| 0 | 0 | 0 |
| 0 | 1 | 0 |
| 0 | 0 | 0 |
| 0 | 0 | 3 |
| 0 | 0 | 1 |
| 0 | 0 | 0 |
| 0 | 1 | 0 |
| 0 | 2 | 0 |
| 0 | 1 | 3 |
| 0 | 1 | 0 |
| 0 | 1 | 0 |
| 0 | 0 | 0 |
| 0 | 0 | 0 |
| 0 | 1 | 0 |
| 0 | 0 | 4 |
| 0 | 0 | 2 |

|   |   |    |   |   |   |   |   |
|---|---|----|---|---|---|---|---|
| 0 | 5 | 5  | 4 | 0 | 0 | 0 | 0 |
| 0 | 0 | 8  | 3 | 0 | 0 | 0 | 0 |
| 0 | 0 | 9  | 3 | 0 | 0 | 0 | 0 |
| 0 | 6 | 12 | 8 | 0 | 0 | 0 | 0 |
| 0 | 7 | 5  | 1 | 0 | 0 | 0 | 0 |
| 0 | 8 | 10 | 3 | 0 | 0 | 0 | 0 |
| 0 | 4 | 13 | 1 | 0 | 0 | 0 | 0 |
| 0 | 4 | 9  | 8 | 0 | 0 | 0 | 0 |
| 0 | 4 | 12 | 5 | 1 | 0 | 0 | 0 |
| 0 | 2 | 6  | 3 | 0 | 0 | 0 | 0 |
| 0 | 2 | 12 | 5 | 0 | 0 | 0 | 0 |
| 0 | 9 | 2  | 4 | 0 | 0 | 0 | 0 |
| 0 | 4 | 18 | 4 | 0 | 0 | 0 | 0 |
| 0 | 7 | 3  | 3 | 0 | 0 | 0 | 0 |
| 0 | 4 | 4  | 3 | 0 | 0 | 0 | 0 |
| 0 | 4 | 1  | 1 | 0 | 0 | 0 | 0 |
| 0 | 8 | 9  | 4 | 0 | 0 | 0 | 0 |
| 0 | 3 | 1  | 2 | 1 | 0 | 0 | 0 |
| 0 | 4 | 14 | 7 | 0 | 0 | 0 | 0 |
| 0 | 1 | 0  | 6 | 0 | 0 | 0 | 0 |
| 0 | 7 | 7  | 4 | 0 | 0 | 0 | 0 |
| 0 | 5 | 0  | 4 | 0 | 0 | 0 | 0 |
| 0 | 1 | 1  | 5 | 0 | 0 | 0 | 0 |
| 0 | 1 | 6  | 4 | 0 | 0 | 0 | 0 |
| 0 | 2 | 10 | 4 | 0 | 0 | 0 | 0 |
| 0 | 1 | 0  | 6 | 0 | 0 | 0 | 0 |
| 0 | 0 | 0  | 4 | 0 | 0 | 0 | 0 |
| 0 | 0 | 18 | 4 | 0 | 0 | 0 | 0 |
| 0 | 0 | 8  | 5 | 0 | 0 | 0 | 0 |



|   |    |   |
|---|----|---|
| 0 | 0  | 7 |
| 0 | 0  | 2 |
| 0 | 0  | 0 |
| 0 | 0  | 1 |
| 1 | 2  | 0 |
| 0 | 1  | 6 |
| 0 | 1  | 0 |
| 0 | 1  | 0 |
| 0 | 6  | 0 |
| 0 | 0  | 2 |
| 0 | 5  | 1 |
| 0 | 2  | 0 |
| 0 | 2  | 0 |
| 0 | 2  | 2 |
| 0 | 4  | 0 |
| 0 | 2  | 1 |
| 0 | 8  | 1 |
| 0 | 3  | 0 |
| 0 | 3  | 4 |
| 0 | 3  | 1 |
| 0 | 2  | 2 |
| 0 | 5  | 1 |
| 0 | 5  | 0 |
| 0 | 0  | 0 |
| 0 | 5  | 0 |
| 0 | 10 | 0 |
| 0 | 4  | 0 |
| 0 | 4  | 0 |

|   |   |    |   |   |   |   |   |
|---|---|----|---|---|---|---|---|
| 0 | 1 | 13 | 8 | 0 | 0 | 0 | 0 |
| 0 | 0 | 6  | 7 | 0 | 0 | 0 | 0 |
| 0 | 0 | 8  | 6 | 0 | 0 | 0 | 0 |
| 0 | 1 | 0  | 2 | 0 | 0 | 0 | 0 |
| 0 | 0 | 0  | 3 | 1 | 0 | 0 | 0 |
| 0 | 4 | 5  | 4 | 0 | 0 | 0 | 0 |
| 0 | 2 | 14 | 8 | 0 | 0 | 0 | 0 |
| 0 | 0 | 1  | 3 | 0 | 0 | 0 | 0 |
| 0 | 0 | 1  | 3 | 0 | 0 | 0 | 0 |
| 0 | 0 | 1  | 4 | 0 | 0 | 0 | 0 |
| 0 | 0 | 6  | 3 | 0 | 0 | 0 | 0 |
| 0 | 0 | 0  | 3 | 0 | 0 | 0 | 0 |
| 0 | 0 | 2  | 4 | 0 | 0 | 0 | 0 |
| 0 | 0 | 5  | 2 | 1 | 0 | 0 | 0 |
| 0 | 0 | 0  | 2 | 0 | 0 | 0 | 0 |
| 0 | 0 | 0  | 2 | 0 | 0 | 0 | 0 |
| 0 | 0 | 0  | 3 | 0 | 0 | 0 | 0 |
| 0 | 0 | 2  | 3 | 0 | 1 | 0 | 1 |
| 0 | 0 | 9  | 5 | 0 | 0 | 0 | 0 |
| 0 | 0 | 2  | 5 | 0 | 0 | 0 | 0 |
| 0 | 0 | 0  | 4 | 0 | 0 | 0 | 0 |
| 0 | 0 | 9  | 6 | 1 | 1 | 0 | 0 |
| 0 | 0 | 1  | 4 | 1 | 0 | 0 | 0 |
| 0 | 0 | 2  | 1 | 0 | 0 | 0 | 0 |
| 0 | 0 | 1  | 0 | 0 | 0 | 0 | 0 |
| 0 | 0 | 1  | 4 | 0 | 0 | 0 | 0 |
| 0 | 0 | 2  | 2 | 0 | 0 | 0 | 0 |
| 0 | 1 | 0  | 3 | 0 | 0 | 0 | 0 |
| 0 | 1 | 0  | 5 | 0 | 0 | 0 | 0 |





|   |   |   |   |   |   |   |   |   |   |   |   |
|---|---|---|---|---|---|---|---|---|---|---|---|
| 0 | 0 | 0 | 0 | 0 | 0 | 0 | 0 | 0 | 0 | 0 | 0 |
| 0 | 0 | 1 | 0 | 0 | 0 | 0 | 0 | 0 | 0 | 0 | 0 |
| 0 | 0 | 0 | 0 | 0 | 0 | 0 | 0 | 0 | 0 | 0 | 1 |
| 0 | 0 | 0 | 0 | 0 | 0 | 0 | 0 | 0 | 0 | 0 | 0 |
| 0 | 0 | 0 | 0 | 0 | 0 | 0 | 0 | 0 | 0 | 0 | 0 |
| 0 | 0 | 0 | 0 | 0 | 0 | 0 | 0 | 0 | 0 | 0 | 0 |
| 0 | 0 | 0 | 0 | 0 | 0 | 0 | 0 | 0 | 0 | 0 | 0 |
| 0 | 0 | 0 | 0 | 0 | 0 | 0 | 2 | 0 | 0 | 0 | 1 |
| 0 | 0 | 0 | 0 | 0 | 1 | 0 | 0 | 0 | 0 | 0 | 0 |
| 0 | 0 | 0 | 0 | 0 | 0 | 0 | 0 | 0 | 0 | 0 | 0 |
| 0 | 0 | 0 | 0 | 0 | 0 | 0 | 0 | 0 | 0 | 0 | 0 |
| 0 | 0 | 0 | 0 | 0 | 0 | 0 | 0 | 0 | 0 | 0 | 0 |
| 0 | 0 | 0 | 0 | 0 | 0 | 0 | 0 | 0 | 0 | 0 | 0 |
| 0 | 0 | 0 | 0 | 0 | 0 | 0 | 0 | 0 | 0 | 0 | 0 |
| 0 | 0 | 0 | 0 | 0 | 0 | 1 | 0 | 0 | 0 | 0 | 0 |
| 0 | 0 | 0 | 0 | 0 | 2 | 0 | 0 | 0 | 0 | 3 | 0 |
| 0 | 0 | 0 | 0 | 0 | 0 | 0 | 0 | 0 | 0 | 0 | 0 |
| 0 | 0 | 0 | 0 | 0 | 0 | 2 | 1 | 0 | 0 | 1 | 0 |
| 0 | 0 | 0 | 0 | 0 | 1 | 0 | 0 | 0 | 0 | 1 | 0 |
| 0 | 0 | 0 | 0 | 0 | 0 | 0 | 0 | 0 | 0 | 0 | 1 |
| 0 | 0 | 0 | 0 | 0 | 0 | 1 | 0 | 0 | 0 | 0 | 0 |
| 0 | 0 | 0 | 0 | 0 | 0 | 1 | 0 | 0 | 0 | 0 | 0 |
| 0 | 0 | 0 | 0 | 0 | 0 | 0 | 0 | 0 | 0 | 0 | 0 |
| 0 | 0 | 0 | 0 | 0 | 0 | 0 | 0 | 0 | 0 | 0 | 0 |
| 0 | 0 | 0 | 0 | 0 | 0 | 0 | 0 | 0 | 0 | 0 | 0 |
| 0 | 0 | 0 | 0 | 0 | 0 | 0 | 0 | 0 | 0 | 0 | 0 |
| 0 | 0 | 0 | 0 | 0 | 0 | 0 | 0 | 0 | 0 | 0 | 0 |
| 0 | 0 | 0 | 0 | 0 | 0 | 0 | 0 | 0 | 0 | 0 | 1 |
| 0 | 0 | 0 | 0 | 0 | 0 | 1 | 0 | 0 | 0 | 0 | 0 |
| 0 | 0 | 0 | 0 | 0 | 0 | 1 | 0 | 0 | 0 | 0 | 0 |

|   |   |   |   |   |   |   |   |   |   |   |
|---|---|---|---|---|---|---|---|---|---|---|
| 0 | 0 | 0 | 0 | 0 | 0 | 0 | 0 | 0 | 0 | 5 |
| 1 | 0 | 0 | 0 | 0 | 0 | 0 | 0 | 0 | 0 | 2 |
| 0 | 0 | 0 | 0 | 0 | 0 | 0 | 0 | 0 | 0 | 0 |
| 0 | 0 | 0 | 0 | 0 | 0 | 0 | 0 | 0 | 0 | 1 |
| 0 | 0 | 0 | 0 | 0 | 0 | 0 | 0 | 0 | 0 | 0 |
| 0 | 0 | 0 | 0 | 0 | 0 | 0 | 0 | 0 | 0 | 0 |
| 0 | 0 | 0 | 0 | 0 | 0 | 0 | 0 | 0 | 0 | 0 |
| 0 | 0 | 0 | 0 | 0 | 0 | 1 | 0 | 0 | 0 | 0 |
| 0 | 0 | 0 | 0 | 0 | 0 | 0 | 0 | 0 | 0 | 0 |
| 0 | 0 | 0 | 0 | 0 | 0 | 0 | 0 | 0 | 0 | 0 |
| 0 | 0 | 0 | 0 | 0 | 0 | 0 | 0 | 0 | 0 | 1 |
| 0 | 0 | 0 | 0 | 0 | 0 | 0 | 0 | 0 | 0 | 0 |
| 0 | 0 | 0 | 0 | 0 | 0 | 0 | 0 | 0 | 0 | 1 |
| 0 | 0 | 0 | 0 | 0 | 0 | 0 | 0 | 0 | 0 | 0 |
| 0 | 0 | 0 | 0 | 0 | 0 | 0 | 0 | 0 | 0 | 0 |
| 0 | 0 | 0 | 0 | 0 | 0 | 0 | 0 | 0 | 0 | 0 |
| 0 | 0 | 0 | 0 | 0 | 0 | 0 | 0 | 0 | 0 | 0 |
| 0 | 0 | 0 | 0 | 0 | 0 | 0 | 0 | 0 | 0 | 0 |
| 0 | 0 | 0 | 0 | 0 | 0 | 0 | 0 | 0 | 0 | 0 |
| 0 | 0 | 0 | 0 | 0 | 0 | 0 | 0 | 0 | 0 | 0 |
| 0 | 0 | 0 | 0 | 0 | 0 | 0 | 0 | 0 | 0 | 0 |
| 0 | 0 | 1 | 0 | 0 | 0 | 1 | 0 | 0 | 1 | 5 |
| 0 | 0 | 0 | 0 | 0 | 0 | 0 | 0 | 0 | 0 | 1 |
| 0 | 0 | 0 | 0 | 0 | 0 | 1 | 0 | 0 | 0 | 0 |
| 0 | 0 | 0 | 0 | 0 | 0 | 0 | 0 | 0 | 0 | 0 |
| 0 | 0 | 0 | 0 | 0 | 0 | 0 | 0 | 0 | 0 | 0 |
| 0 | 0 | 0 | 0 | 0 | 0 | 0 | 0 | 0 | 0 | 0 |
| 0 | 0 | 0 | 0 | 0 | 0 | 0 | 0 | 0 | 0 | 0 |
| 0 | 0 | 0 | 0 | 0 | 0 | 0 | 0 | 0 | 0 | 0 |
| 0 | 0 | 0 | 0 | 0 | 0 | 0 | 0 | 0 | 0 | 0 |
| 0 | 0 | 0 | 0 | 0 | 0 | 0 | 0 | 0 | 0 | 1 |
| 0 | 0 | 0 | 0 | 0 | 0 | 0 | 0 | 0 | 0 | 0 |
| 0 | 0 | 0 | 0 | 0 | 1 | 0 | 0 | 0 | 0 | 0 |

|   |   |   |   |   |   |   |   |   |   |   |
|---|---|---|---|---|---|---|---|---|---|---|
| 0 | 0 | 0 | 0 | 0 | 3 | 0 | 0 | 0 | 2 | 0 |
| 0 | 0 | 0 | 0 | 0 | 0 | 1 | 0 | 0 | 0 | 0 |
| 0 | 0 | 0 | 0 | 0 | 3 | 5 | 0 | 0 | 1 | 0 |
| 0 | 0 | 0 | 0 | 0 | 2 | 0 | 0 | 0 | 1 | 0 |
| 0 | 0 | 0 | 0 | 0 | 0 | 0 | 0 | 0 | 0 | 0 |
| 0 | 0 | 0 | 0 | 0 | 0 | 0 | 0 | 0 | 0 | 0 |
| 0 | 0 | 0 | 0 | 0 | 0 | 0 | 0 | 0 | 0 | 0 |
| 0 | 0 | 0 | 0 | 0 | 0 | 0 | 0 | 0 | 1 | 0 |
| 0 | 0 | 0 | 0 | 0 | 0 | 0 | 0 | 0 | 0 | 1 |
| 0 | 0 | 0 | 0 | 0 | 0 | 0 | 0 | 0 | 0 | 2 |
| 0 | 0 | 0 | 0 | 0 | 0 | 1 | 0 | 0 | 0 | 0 |
| 0 | 0 | 0 | 0 | 0 | 0 | 0 | 0 | 0 | 0 | 2 |
| 0 | 0 | 0 | 0 | 0 | 0 | 0 | 0 | 0 | 0 | 0 |
| 0 | 0 | 0 | 0 | 0 | 0 | 0 | 0 | 0 | 0 | 0 |
| 0 | 0 | 0 | 0 | 0 | 0 | 0 | 0 | 0 | 1 | 0 |
| 0 | 0 | 0 | 0 | 0 | 0 | 0 | 0 | 0 | 0 | 0 |
| 0 | 0 | 0 | 0 | 0 | 0 | 0 | 0 | 0 | 0 | 0 |
| 0 | 0 | 0 | 0 | 0 | 0 | 0 | 0 | 0 | 0 | 0 |
| 0 | 0 | 0 | 0 | 0 | 0 | 0 | 0 | 0 | 0 | 0 |
| 0 | 0 | 0 | 0 | 0 | 1 | 1 | 0 | 0 | 0 | 0 |
| 0 | 0 | 0 | 0 | 0 | 0 | 0 | 0 | 0 | 0 | 1 |
| 0 | 0 | 0 | 0 | 0 | 0 | 0 | 0 | 0 | 0 | 0 |
| 0 | 0 | 0 | 0 | 0 | 2 | 0 | 0 | 0 | 0 | 0 |
| 0 | 0 | 0 | 0 | 0 | 0 | 0 | 0 | 0 | 1 | 0 |
| 0 | 0 | 0 | 0 | 0 | 0 | 5 | 0 | 0 | 2 | 3 |
| 0 | 0 | 0 | 0 | 0 | 0 | 1 | 0 | 0 | 0 | 0 |
| 0 | 0 | 0 | 0 | 0 | 0 | 0 | 0 | 0 | 0 | 1 |
| 0 | 0 | 0 | 0 | 0 | 1 | 0 | 0 | 0 | 0 | 0 |
| 0 | 0 | 0 | 0 | 0 | 3 | 1 | 0 | 0 | 0 | 0 |







|   |   |   |   |   |   |   |   |   |   |   |
|---|---|---|---|---|---|---|---|---|---|---|
| 0 | 0 | 0 | 0 | 0 | 0 | 0 | 0 | 0 | 0 | 0 |
| 0 | 0 | 0 | 0 | 0 | 0 | 0 | 0 | 0 | 0 | 0 |
| 0 | 0 | 0 | 0 | 0 | 0 | 0 | 0 | 0 | 0 | 0 |
| 0 | 0 | 0 | 0 | 0 | 0 | 0 | 0 | 0 | 0 | 0 |
| 0 | 0 | 0 | 0 | 0 | 0 | 0 | 0 | 0 | 0 | 0 |
| 0 | 0 | 0 | 0 | 0 | 0 | 0 | 0 | 0 | 0 | 0 |
| 0 | 0 | 0 | 0 | 0 | 0 | 0 | 0 | 0 | 0 | 0 |
| 0 | 0 | 0 | 0 | 0 | 0 | 0 | 0 | 0 | 0 | 0 |
| 0 | 0 | 0 | 0 | 0 | 0 | 0 | 0 | 0 | 0 | 0 |
| 0 | 0 | 0 | 0 | 0 | 0 | 0 | 0 | 0 | 0 | 0 |
| 0 | 0 | 0 | 0 | 0 | 0 | 0 | 0 | 0 | 0 | 0 |
| 0 | 0 | 0 | 0 | 0 | 0 | 0 | 0 | 0 | 0 | 0 |
| 0 | 0 | 0 | 0 | 0 | 0 | 0 | 0 | 0 | 0 | 0 |
| 0 | 0 | 0 | 0 | 0 | 0 | 0 | 0 | 0 | 0 | 0 |
| 0 | 0 | 0 | 0 | 0 | 0 | 1 | 0 | 0 | 0 | 0 |
| 0 | 0 | 0 | 0 | 0 | 0 | 0 | 0 | 0 | 0 | 0 |
| 0 | 0 | 0 | 0 | 0 | 0 | 0 | 0 | 0 | 0 | 1 |
| 0 | 0 | 0 | 0 | 0 | 0 | 0 | 0 | 0 | 0 | 0 |
| 0 | 0 | 0 | 0 | 0 | 0 | 1 | 0 | 0 | 1 | 0 |
| 0 | 0 | 0 | 0 | 0 | 0 | 0 | 0 | 0 | 0 | 0 |
| 0 | 0 | 0 | 0 | 0 | 0 | 0 | 0 | 0 | 0 | 0 |
| 0 | 0 | 0 | 0 | 0 | 0 | 0 | 0 | 0 | 0 | 0 |
| 0 | 0 | 0 | 0 | 0 | 0 | 0 | 0 | 0 | 0 | 0 |
| 0 | 0 | 0 | 0 | 0 | 0 | 0 | 0 | 0 | 0 | 0 |
| 0 | 0 | 0 | 0 | 0 | 0 | 0 | 0 | 0 | 0 | 0 |
| 0 | 0 | 0 | 0 | 0 | 0 | 0 | 0 | 0 | 0 | 0 |
| 0 | 0 | 0 | 0 | 0 | 0 | 1 | 0 | 0 | 0 | 0 |
| 0 | 0 | 0 | 0 | 0 | 0 | 1 | 0 | 0 | 0 | 0 |



|   |   |   |   |   |   |   |   |   |   |   |
|---|---|---|---|---|---|---|---|---|---|---|
| 0 | 0 | 0 | 0 | 0 | 0 | 0 | 0 | 0 | 0 | 2 |
| 0 | 0 | 0 | 0 | 0 | 0 | 1 | 0 | 0 | 0 | 0 |
| 0 | 0 | 0 | 0 | 0 | 0 | 0 | 0 | 0 | 0 | 0 |
| 0 | 0 | 0 | 0 | 0 | 0 | 0 | 0 | 0 | 0 | 1 |
| 0 | 0 | 0 | 0 | 0 | 0 | 0 | 0 | 0 | 0 | 0 |
| 0 | 0 | 0 | 0 | 0 | 0 | 0 | 0 | 0 | 0 | 0 |
| 0 | 0 | 0 | 0 | 0 | 0 | 1 | 0 | 0 | 0 | 0 |
| 0 | 0 | 0 | 0 | 0 | 0 | 0 | 0 | 0 | 0 | 1 |
| 0 | 0 | 0 | 0 | 0 | 0 | 1 | 0 | 0 | 0 | 2 |
| 0 | 0 | 0 | 0 | 0 | 0 | 0 | 0 | 0 | 0 | 1 |
| 0 | 0 | 0 | 0 | 0 | 0 | 0 | 0 | 0 | 0 | 7 |
| 0 | 0 | 0 | 0 | 0 | 0 | 0 | 0 | 0 | 0 | 0 |
| 0 | 0 | 0 | 0 | 0 | 0 | 0 | 0 | 0 | 0 | 1 |
| 0 | 0 | 0 | 0 | 0 | 0 | 0 | 0 | 0 | 0 | 0 |
| 0 | 0 | 0 | 0 | 0 | 0 | 0 | 0 | 0 | 0 | 0 |
| 0 | 0 | 0 | 0 | 0 | 0 | 0 | 0 | 0 | 0 | 0 |
| 0 | 0 | 1 | 0 | 0 | 0 | 0 | 0 | 0 | 1 | 0 |
| 0 | 0 | 0 | 0 | 0 | 0 | 0 | 1 | 0 | 0 | 2 |
| 0 | 0 | 0 | 0 | 0 | 0 | 0 | 1 | 0 | 0 | 0 |
| 0 | 0 | 0 | 0 | 0 | 0 | 0 | 0 | 0 | 0 | 1 |
| 0 | 0 | 0 | 0 | 0 | 0 | 0 | 0 | 0 | 0 | 0 |
| 0 | 0 | 0 | 0 | 0 | 0 | 1 | 0 | 0 | 0 | 0 |
| 0 | 0 | 0 | 0 | 0 | 0 | 0 | 0 | 0 | 0 | 1 |
| 0 | 0 | 0 | 0 | 0 | 0 | 0 | 0 | 0 | 0 | 0 |
| 0 | 0 | 0 | 0 | 0 | 0 | 0 | 0 | 0 | 0 | 1 |
| 0 | 0 | 0 | 0 | 0 | 0 | 0 | 0 | 0 | 0 | 0 |
| 0 | 0 | 1 | 0 | 0 | 0 | 1 | 0 | 0 | 0 | 0 |
| 0 | 0 | 0 | 0 | 0 | 0 | 0 | 0 | 0 | 0 | 0 |
| 0 | 0 | 0 | 0 | 0 | 0 | 0 | 0 | 0 | 0 | 2 |
| 0 | 0 | 0 | 0 | 0 | 0 | 0 | 0 | 0 | 1 | 0 |
| 0 | 0 | 0 | 0 | 0 | 2 | 0 | 0 | 0 | 1 | 0 |









|   |   |   |   |   |   |   |   |   |   |   |   |
|---|---|---|---|---|---|---|---|---|---|---|---|
| 0 | 0 | 0 | 0 | 0 | 0 | 0 | 0 | 0 | 0 | 0 | 1 |
| 0 | 0 | 0 | 0 | 0 | 0 | 0 | 0 | 0 | 0 | 0 | 0 |
| 0 | 0 | 0 | 0 | 0 | 0 | 0 | 0 | 0 | 0 | 0 | 0 |
| 0 | 0 | 0 | 0 | 0 | 0 | 0 | 0 | 0 | 0 | 0 | 0 |
| 0 | 0 | 0 | 0 | 0 | 0 | 0 | 0 | 0 | 0 | 0 | 0 |
| 0 | 0 | 0 | 0 | 0 | 0 | 0 | 0 | 0 | 0 | 0 | 2 |
| 0 | 0 | 0 | 0 | 0 | 0 | 0 | 0 | 0 | 0 | 0 | 0 |
| 0 | 0 | 0 | 0 | 0 | 0 | 0 | 0 | 0 | 0 | 0 | 0 |
| 0 | 0 | 0 | 0 | 0 | 0 | 0 | 0 | 0 | 0 | 0 | 0 |
| 0 | 0 | 0 | 0 | 0 | 0 | 0 | 0 | 0 | 0 | 0 | 0 |
| 0 | 0 | 0 | 0 | 0 | 0 | 0 | 0 | 0 | 0 | 0 | 1 |
| 0 | 0 | 0 | 0 | 0 | 0 | 0 | 0 | 0 | 0 | 0 | 1 |
| 0 | 0 | 0 | 0 | 0 | 0 | 0 | 0 | 0 | 0 | 0 | 0 |
| 0 | 0 | 0 | 0 | 0 | 0 | 0 | 0 | 0 | 0 | 0 | 0 |
| 0 | 0 | 0 | 0 | 0 | 0 | 0 | 0 | 0 | 0 | 0 | 2 |
| 0 | 0 | 0 | 0 | 0 | 0 | 0 | 0 | 0 | 0 | 0 | 0 |
| 0 | 0 | 0 | 0 | 0 | 0 | 0 | 0 | 0 | 0 | 0 | 0 |
| 0 | 0 | 0 | 0 | 0 | 0 | 0 | 0 | 0 | 0 | 0 | 1 |
| 0 | 0 | 0 | 0 | 0 | 0 | 0 | 1 | 0 | 0 | 1 | 1 |
| 0 | 0 | 0 | 0 | 0 | 0 | 0 | 0 | 0 | 0 | 0 | 0 |
| 0 | 0 | 0 | 0 | 0 | 0 | 0 | 0 | 0 | 0 | 0 | 0 |
| 0 | 0 | 0 | 0 | 0 | 0 | 0 | 0 | 0 | 0 | 0 | 0 |

|        |        |        |        |        |        |        |        |        |        |        |   |
|--------|--------|--------|--------|--------|--------|--------|--------|--------|--------|--------|---|
| glytri | halcoo | halwhi | hamzel | hemcre | hemhir | hetfil | isocla | laspar | lepido | levgra |   |
| 0      | 0      | 0      | 0      | 0      | 0      | 0      | 0      | 0      | 0      | 0      | 0 |
| 0      | 0      | 0      | 0      | 0      | 0      | 0      | 2      | 0      | 0      | 0      | 0 |
| 0      | 0      | 0      | 0      | 0      | 0      | 0      | 0      | 0      | 0      | 0      | 0 |
| 0      | 0      | 0      | 0      | 0      | 0      | 0      | 1      | 0      | 0      | 0      | 0 |





|   |   |   |   |   |   |    |   |   |   |   |
|---|---|---|---|---|---|----|---|---|---|---|
| 0 | 0 | 0 | 0 | 0 | 0 | 1  | 0 | 0 | 0 | 0 |
| 0 | 0 | 1 | 0 | 0 | 0 | 0  | 0 | 0 | 0 | 0 |
| 0 | 0 | 1 | 0 | 0 | 0 | 0  | 0 | 0 | 0 | 0 |
| 0 | 0 | 1 | 0 | 0 | 0 | 0  | 0 | 0 | 0 | 0 |
| 0 | 0 | 0 | 0 | 0 | 0 | 0  | 0 | 0 | 0 | 0 |
| 0 | 0 | 0 | 0 | 0 | 0 | 1  | 0 | 0 | 0 | 0 |
| 0 | 0 | 0 | 0 | 0 | 0 | 3  | 0 | 1 | 0 | 0 |
| 0 | 0 | 0 | 0 | 0 | 1 | 5  | 0 | 0 | 0 | 0 |
| 0 | 0 | 0 | 0 | 0 | 0 | 2  | 0 | 0 | 0 | 0 |
| 0 | 0 | 0 | 1 | 0 | 0 | 3  | 0 | 0 | 0 | 0 |
| 0 | 0 | 1 | 0 | 0 | 0 | 3  | 0 | 0 | 0 | 0 |
| 0 | 0 | 0 | 0 | 0 | 0 | 3  | 0 | 0 | 0 | 0 |
| 0 | 0 | 0 | 0 | 0 | 0 | 4  | 0 | 0 | 0 | 0 |
| 0 | 0 | 0 | 0 | 0 | 0 | 5  | 0 | 0 | 0 | 0 |
| 0 | 0 | 0 | 0 | 0 | 1 | 1  | 0 | 0 | 0 | 0 |
| 0 | 0 | 0 | 0 | 0 | 0 | 2  | 0 | 0 | 0 | 0 |
| 0 | 0 | 0 | 0 | 0 | 0 | 2  | 0 | 0 | 0 | 0 |
| 0 | 0 | 0 | 0 | 0 | 1 | 6  | 0 | 0 | 0 | 0 |
| 0 | 0 | 0 | 0 | 0 | 0 | 2  | 0 | 0 | 0 | 0 |
| 0 | 0 | 0 | 0 | 0 | 0 | 2  | 0 | 0 | 0 | 0 |
| 0 | 0 | 0 | 0 | 0 | 0 | 6  | 0 | 0 | 0 | 0 |
| 0 | 0 | 0 | 0 | 0 | 0 | 5  | 0 | 0 | 0 | 0 |
| 0 | 0 | 0 | 0 | 0 | 0 | 6  | 0 | 0 | 0 | 0 |
| 0 | 0 | 1 | 0 | 0 | 1 | 4  | 0 | 0 | 0 | 0 |
| 0 | 0 | 1 | 0 | 0 | 0 | 5  | 0 | 0 | 0 | 0 |
| 0 | 0 | 0 | 0 | 0 | 1 | 0  | 0 | 0 | 0 | 0 |
| 0 | 0 | 2 | 0 | 0 | 0 | 3  | 0 | 0 | 0 | 0 |
| 0 | 0 | 0 | 0 | 0 | 0 | 23 | 0 | 0 | 0 | 0 |

|   |   |   |   |   |   |    |   |   |   |   |
|---|---|---|---|---|---|----|---|---|---|---|
| 0 | 0 | 2 | 1 | 0 | 0 | 4  | 0 | 0 | 0 | 0 |
| 0 | 0 | 0 | 0 | 0 | 0 | 2  | 0 | 0 | 0 | 0 |
| 0 | 0 | 0 | 0 | 0 | 0 | 2  | 0 | 0 | 0 | 2 |
| 0 | 0 | 0 | 0 | 0 | 1 | 4  | 0 | 0 | 0 | 0 |
| 0 | 0 | 1 | 0 | 0 | 0 | 5  | 0 | 0 | 0 | 0 |
| 0 | 0 | 1 | 0 | 0 | 0 | 5  | 0 | 0 | 0 | 0 |
| 0 | 0 | 0 | 0 | 0 | 0 | 12 | 0 | 0 | 0 | 0 |
| 0 | 0 | 1 | 0 | 0 | 1 | 15 | 0 | 0 | 0 | 0 |
| 0 | 0 | 0 | 0 | 0 | 2 | 11 | 0 | 0 | 0 | 0 |
| 0 | 0 | 0 | 0 | 0 | 0 | 27 | 0 | 0 | 0 | 0 |
| 0 | 0 | 1 | 2 | 0 | 0 | 28 | 0 | 0 | 0 | 0 |
| 0 | 0 | 0 | 1 | 0 | 0 | 27 | 0 | 0 | 0 | 0 |
| 0 | 0 | 0 | 0 | 0 | 1 | 24 | 0 | 0 | 0 | 0 |
| 0 | 0 | 0 | 1 | 0 | 1 | 29 | 0 | 0 | 0 | 0 |
| 0 | 0 | 0 | 1 | 0 | 1 | 30 | 0 | 0 | 0 | 0 |
| 0 | 0 | 0 | 0 | 0 | 0 | 25 | 0 | 0 | 0 | 0 |
| 0 | 0 | 2 | 0 | 0 | 0 | 12 | 0 | 0 | 0 | 0 |
| 0 | 0 | 0 | 0 | 0 | 0 | 15 | 0 | 0 | 0 | 0 |
| 0 | 0 | 1 | 0 | 0 | 0 | 24 | 0 | 0 | 0 | 0 |
| 0 | 0 | 2 | 0 | 0 | 2 | 15 | 0 | 0 | 0 | 0 |
| 0 | 0 | 0 | 0 | 0 | 0 | 15 | 0 | 0 | 0 | 0 |
| 0 | 0 | 0 | 0 | 0 | 1 | 19 | 0 | 0 | 0 | 0 |
| 0 | 0 | 0 | 0 | 0 | 1 | 16 | 0 | 0 | 0 | 0 |
| 0 | 0 | 0 | 1 | 0 | 0 | 2  | 0 | 0 | 0 | 0 |
| 0 | 0 | 0 | 0 | 0 | 0 | 8  | 0 | 0 | 0 | 0 |
| 1 | 0 | 1 | 0 | 0 | 0 | 14 | 0 | 0 | 1 | 0 |
| 0 | 0 | 0 | 0 | 0 | 0 | 5  | 0 | 0 | 0 | 0 |
| 0 | 0 | 0 | 0 | 0 | 0 | 20 | 0 | 0 | 0 | 0 |
| 0 | 0 | 1 | 0 | 0 | 0 | 17 | 0 | 0 | 0 | 0 |

|   |   |   |   |   |   |    |   |   |   |   |
|---|---|---|---|---|---|----|---|---|---|---|
| 0 | 0 | 0 | 0 | 0 | 0 | 13 | 0 | 0 | 0 | 0 |
| 0 | 0 | 0 | 0 | 0 | 0 | 8  | 0 | 0 | 0 | 0 |
| 0 | 0 | 1 | 0 | 0 | 0 | 17 | 0 | 0 | 0 | 0 |
| 0 | 0 | 0 | 0 | 0 | 0 | 5  | 0 | 0 | 0 | 0 |
| 0 | 0 | 1 | 0 | 0 | 1 | 29 | 0 | 0 | 0 | 0 |
| 0 | 0 | 0 | 0 | 0 | 1 | 11 | 0 | 0 | 0 | 0 |
| 0 | 0 | 0 | 0 | 0 | 0 | 14 | 0 | 0 | 0 | 0 |
| 0 | 0 | 0 | 0 | 0 | 0 | 16 | 0 | 0 | 0 | 0 |
| 0 | 0 | 0 | 0 | 0 | 0 | 23 | 0 | 0 | 0 | 0 |
| 0 | 0 | 0 | 0 | 0 | 0 | 14 | 0 | 0 | 0 | 0 |
| 0 | 0 | 0 | 0 | 0 | 0 | 8  | 0 | 0 | 0 | 0 |
| 0 | 0 | 0 | 0 | 0 | 0 | 9  | 0 | 0 | 0 | 0 |
| 0 | 0 | 0 | 0 | 0 | 0 | 13 | 0 | 0 | 0 | 0 |
| 0 | 0 | 0 | 0 | 0 | 0 | 4  | 0 | 0 | 0 | 0 |
| 0 | 0 | 2 | 0 | 0 | 0 | 3  | 0 | 0 | 0 | 0 |
| 0 | 0 | 2 | 0 | 0 | 1 | 11 | 0 | 0 | 0 | 0 |
| 0 | 0 | 1 | 0 | 0 | 0 | 10 | 0 | 0 | 0 | 0 |
| 0 | 0 | 3 | 0 | 0 | 0 | 6  | 0 | 0 | 0 | 0 |
| 0 | 0 | 4 | 0 | 0 | 0 | 6  | 0 | 0 | 0 | 0 |
| 0 | 0 | 1 | 0 | 0 | 0 | 19 | 0 | 0 | 0 | 0 |
| 0 | 0 | 0 | 0 | 0 | 1 | 12 | 0 | 0 | 0 | 0 |
| 0 | 0 | 4 | 0 | 0 | 0 | 8  | 0 | 0 | 0 | 0 |
| 0 | 0 | 1 | 0 | 0 | 1 | 15 | 0 | 0 | 0 | 0 |
| 0 | 0 | 1 | 0 | 0 | 0 | 11 | 0 | 0 | 1 | 0 |
| 0 | 0 | 0 | 0 | 0 | 0 | 17 | 0 | 0 | 0 | 0 |
| 0 | 0 | 2 | 0 | 0 | 0 | 10 | 0 | 0 | 0 | 0 |
| 0 | 0 | 3 | 0 | 0 | 0 | 13 | 0 | 0 | 0 | 0 |
| 0 | 0 | 0 | 0 | 0 | 1 | 18 | 0 | 0 | 0 | 0 |
| 0 | 0 | 1 | 0 | 0 | 0 | 11 | 0 | 0 | 0 | 0 |

|   |   |   |   |   |   |    |   |   |   |   |
|---|---|---|---|---|---|----|---|---|---|---|
| 0 | 0 | 3 | 0 | 0 | 0 | 15 | 0 | 0 | 0 | 0 |
| 0 | 0 | 4 | 0 | 0 | 0 | 8  | 0 | 0 | 0 | 0 |
| 0 | 0 | 0 | 0 | 0 | 0 | 4  | 0 | 0 | 0 | 0 |
| 0 | 0 | 1 | 0 | 0 | 1 | 10 | 0 | 0 | 0 | 0 |
| 0 | 0 | 1 | 0 | 0 | 1 | 10 | 0 | 0 | 0 | 0 |
| 0 | 0 | 1 | 0 | 0 | 2 | 14 | 0 | 0 | 0 | 0 |
| 0 | 0 | 0 | 0 | 0 | 1 | 21 | 0 | 0 | 0 | 0 |
| 0 | 0 | 1 | 0 | 0 | 0 | 7  | 0 | 0 | 0 | 0 |
| 0 | 0 | 2 | 0 | 0 | 0 | 14 | 0 | 0 | 0 | 0 |
| 0 | 0 | 0 | 0 | 0 | 0 | 4  | 0 | 0 | 0 | 0 |
| 0 | 0 | 0 | 0 | 0 | 0 | 16 | 0 | 0 | 0 | 0 |
| 0 | 0 | 3 | 0 | 0 | 0 | 6  | 0 | 0 | 0 | 0 |
| 0 | 0 | 1 | 0 | 0 | 0 | 5  | 0 | 0 | 0 | 0 |
| 0 | 0 | 2 | 0 | 0 | 2 | 7  | 0 | 0 | 0 | 0 |
| 0 | 0 | 1 | 0 | 0 | 0 | 2  | 0 | 0 | 0 | 0 |
| 0 | 0 | 0 | 0 | 0 | 0 | 14 | 0 | 0 | 0 | 0 |
| 0 | 0 | 1 | 0 | 0 | 0 | 9  | 0 | 0 | 0 | 0 |
| 0 | 0 | 0 | 0 | 0 | 0 | 13 | 0 | 0 | 0 | 0 |
| 0 | 0 | 1 | 1 | 0 | 0 | 12 | 0 | 0 | 0 | 0 |
| 0 | 0 | 6 | 0 | 0 | 0 | 7  | 0 | 0 | 0 | 0 |
| 0 | 0 | 1 | 0 | 0 | 0 | 4  | 0 | 0 | 0 | 0 |
| 0 | 0 | 0 | 0 | 0 | 0 | 1  | 0 | 0 | 0 | 0 |
| 0 | 0 | 0 | 0 | 0 | 0 | 2  | 0 | 0 | 1 | 0 |
| 0 | 0 | 2 | 0 | 0 | 0 | 10 | 0 | 0 | 0 | 0 |
| 1 | 0 | 6 | 0 | 0 | 0 | 5  | 0 | 0 | 0 | 0 |
| 0 | 0 | 1 | 1 | 0 | 0 | 1  | 0 | 0 | 0 | 0 |
| 0 | 0 | 0 | 0 | 0 | 0 | 1  | 0 | 0 | 0 | 0 |
| 0 | 0 | 0 | 0 | 0 | 0 | 11 | 0 | 0 | 0 | 0 |
| 0 | 0 | 0 | 1 | 0 | 0 | 8  | 0 | 0 | 0 | 0 |

|   |   |   |   |   |   |   |   |   |   |   |
|---|---|---|---|---|---|---|---|---|---|---|
| 0 | 0 | 0 | 0 | 0 | 0 | 1 | 0 | 0 | 0 | 0 |
| 0 | 0 | 1 | 0 | 0 | 0 | 5 | 0 | 0 | 0 | 0 |
| 0 | 0 | 2 | 0 | 0 | 0 | 3 | 0 | 0 | 0 | 0 |
| 0 | 0 | 0 | 0 | 2 | 0 | 5 | 0 | 0 | 0 | 0 |
| 0 | 0 | 1 | 2 | 0 | 0 | 8 | 0 | 0 | 0 | 0 |
| 0 | 0 | 0 | 0 | 0 | 0 | 6 | 0 | 0 | 0 | 0 |
| 0 | 0 | 0 | 1 | 0 | 0 | 9 | 0 | 0 | 0 | 0 |
| 0 | 0 | 1 | 0 | 0 | 0 | 9 | 0 | 0 | 0 | 0 |
| 0 | 0 | 0 | 1 | 0 | 0 | 8 | 0 | 0 | 0 | 0 |
| 0 | 0 | 1 | 0 | 0 | 0 | 7 | 0 | 0 | 0 | 0 |
| 0 | 0 | 0 | 0 | 0 | 0 | 5 | 0 | 0 | 0 | 0 |
| 0 | 0 | 4 | 1 | 0 | 0 | 5 | 0 | 0 | 0 | 0 |
| 0 | 0 | 0 | 0 | 0 | 0 | 8 | 0 | 0 | 0 | 0 |
| 0 | 0 | 0 | 0 | 0 | 1 | 2 | 0 | 0 | 0 | 0 |
| 0 | 0 | 1 | 0 | 1 | 1 | 5 | 0 | 0 | 0 | 0 |
| 0 | 0 | 1 | 0 | 0 | 0 | 9 | 0 | 0 | 0 | 0 |
| 0 | 0 | 0 | 0 | 0 | 0 | 4 | 0 | 0 | 0 | 0 |
| 0 | 0 | 0 | 0 | 0 | 0 | 6 | 0 | 0 | 0 | 0 |
| 0 | 0 | 0 | 0 | 0 | 0 | 6 | 0 | 0 | 0 | 0 |
| 0 | 0 | 0 | 0 | 0 | 0 | 3 | 0 | 0 | 0 | 0 |
| 0 | 0 | 0 | 0 | 0 | 0 | 4 | 0 | 0 | 0 | 0 |
| 0 | 0 | 0 | 0 | 0 | 1 | 8 | 0 | 0 | 0 | 0 |
| 0 | 0 | 0 | 0 | 0 | 0 | 7 | 0 | 0 | 0 | 0 |
| 0 | 0 | 0 | 0 | 0 | 0 | 6 | 0 | 0 | 0 | 0 |
| 0 | 0 | 0 | 0 | 0 | 1 | 9 | 0 | 0 | 0 | 0 |
| 0 | 0 | 0 | 0 | 0 | 0 | 0 | 0 | 0 | 0 | 0 |
| 0 | 0 | 0 | 0 | 0 | 0 | 0 | 0 | 0 | 0 | 0 |
| 0 | 0 | 0 | 0 | 0 | 0 | 6 | 0 | 0 | 0 | 0 |
| 0 | 0 | 0 | 0 | 0 | 0 | 2 | 0 | 0 | 0 | 0 |

|   |   |   |   |   |   |   |   |   |   |   |
|---|---|---|---|---|---|---|---|---|---|---|
| 0 | 0 | 0 | 0 | 0 | 0 | 3 | 0 | 0 | 0 | 0 |
| 0 | 0 | 0 | 0 | 0 | 0 | 4 | 0 | 0 | 0 | 0 |
| 0 | 0 | 0 | 0 | 0 | 0 | 3 | 0 | 0 | 0 | 0 |
| 0 | 0 | 0 | 0 | 0 | 0 | 0 | 0 | 0 | 0 | 0 |
| 0 | 0 | 5 | 0 | 0 | 0 | 3 | 0 | 0 | 0 | 0 |
| 0 | 0 | 0 | 0 | 0 | 0 | 3 | 0 | 0 | 0 | 0 |
| 0 | 0 | 0 | 1 | 0 | 0 | 2 | 0 | 0 | 0 | 0 |
| 0 | 0 | 1 | 0 | 0 | 0 | 1 | 0 | 0 | 0 | 0 |
| 0 | 0 | 0 | 0 | 0 | 0 | 0 | 0 | 0 | 0 | 0 |
| 0 | 0 | 0 | 0 | 0 | 0 | 0 | 0 | 0 | 0 | 0 |
| 0 | 0 | 0 | 0 | 0 | 0 | 1 | 0 | 0 | 0 | 0 |
| 0 | 0 | 1 | 0 | 0 | 0 | 0 | 0 | 0 | 0 | 0 |
| 0 | 0 | 0 | 0 | 0 | 0 | 1 | 0 | 0 | 0 | 0 |
| 0 | 0 | 0 | 0 | 0 | 0 | 0 | 0 | 0 | 0 | 0 |
| 0 | 0 | 0 | 0 | 0 | 0 | 0 | 0 | 0 | 0 | 0 |
| 0 | 0 | 0 | 0 | 0 | 0 | 0 | 0 | 0 | 0 | 0 |
| 0 | 0 | 0 | 0 | 0 | 0 | 0 | 0 | 0 | 0 | 0 |
| 0 | 0 | 0 | 0 | 0 | 0 | 0 | 0 | 0 | 0 | 0 |
| 0 | 0 | 0 | 0 | 0 | 0 | 0 | 0 | 0 | 0 | 0 |
| 0 | 0 | 0 | 0 | 0 | 0 | 0 | 0 | 0 | 0 | 0 |
| 0 | 0 | 0 | 0 | 0 | 0 | 0 | 0 | 0 | 0 | 0 |
| 0 | 0 | 0 | 0 | 0 | 0 | 0 | 0 | 0 | 0 | 0 |
| 0 | 0 | 0 | 0 | 0 | 0 | 0 | 0 | 0 | 0 | 0 |
| 0 | 0 | 0 | 0 | 0 | 0 | 0 | 0 | 0 | 0 | 0 |
| 0 | 0 | 0 | 0 | 0 | 0 | 0 | 0 | 0 | 0 | 0 |
| 0 | 0 | 0 | 0 | 0 | 0 | 0 | 0 | 0 | 0 | 0 |
| 0 | 0 | 1 | 0 | 0 | 0 | 0 | 0 | 0 | 0 | 0 |
| 0 | 0 | 0 | 0 | 0 | 0 | 1 | 0 | 0 | 0 | 0 |
| 0 | 0 | 0 | 0 | 0 | 0 | 0 | 0 | 0 | 0 | 0 |
| 0 | 0 | 0 | 0 | 0 | 0 | 0 | 0 | 0 | 0 | 0 |
| 0 | 0 | 0 | 0 | 0 | 0 | 0 | 0 | 0 | 0 | 0 |
| 0 | 0 | 0 | 0 | 0 | 0 | 0 | 0 | 0 | 0 | 0 |
| 0 | 0 | 0 | 0 | 0 | 0 | 0 | 0 | 0 | 0 | 0 |
| 0 | 0 | 0 | 0 | 0 | 0 | 0 | 0 | 0 | 0 | 0 |
| 0 | 0 | 0 | 0 | 0 | 0 | 0 | 0 | 0 | 0 | 0 |
| 0 | 0 | 1 | 0 | 0 | 0 | 0 | 0 | 0 | 0 | 0 |
| 0 | 0 | 1 | 0 | 0 | 0 | 0 | 0 | 0 | 0 | 0 |

|   |   |   |   |   |   |    |   |   |   |   |
|---|---|---|---|---|---|----|---|---|---|---|
| 0 | 0 | 0 | 0 | 0 | 0 | 1  | 0 | 0 | 0 | 0 |
| 0 | 0 | 1 | 0 | 0 | 0 | 0  | 0 | 0 | 0 | 0 |
| 0 | 0 | 0 | 0 | 0 | 0 | 1  | 0 | 0 | 0 | 0 |
| 0 | 0 | 1 | 0 | 0 | 0 | 0  | 0 | 0 | 0 | 0 |
| 0 | 0 | 0 | 0 | 0 | 0 | 6  | 0 | 0 | 0 | 0 |
| 0 | 0 | 2 | 0 | 0 | 0 | 6  | 0 | 0 | 0 | 0 |
| 0 | 0 | 0 | 0 | 0 | 0 | 1  | 0 | 0 | 0 | 0 |
| 0 | 0 | 0 | 0 | 0 | 1 | 3  | 0 | 0 | 0 | 0 |
| 0 | 0 | 0 | 0 | 0 | 0 | 3  | 0 | 0 | 0 | 0 |
| 0 | 0 | 0 | 0 | 0 | 1 | 1  | 0 | 0 | 0 | 0 |
| 0 | 0 | 0 | 0 | 0 | 0 | 3  | 0 | 0 | 0 | 0 |
| 0 | 0 | 0 | 1 | 1 | 0 | 3  | 0 | 0 | 0 | 0 |
| 0 | 0 | 0 | 0 | 0 | 0 | 6  | 0 | 0 | 0 | 0 |
| 0 | 0 | 0 | 0 | 0 | 0 | 11 | 0 | 0 | 0 | 0 |
| 0 | 0 | 1 | 0 | 0 | 0 | 4  | 0 | 0 | 0 | 0 |
| 0 | 0 | 0 | 1 | 1 | 0 | 2  | 0 | 0 | 0 | 0 |
| 0 | 0 | 2 | 0 | 0 | 0 | 0  | 0 | 0 | 0 | 0 |
| 0 | 0 | 0 | 1 | 0 | 0 | 1  | 0 | 0 | 0 | 0 |
| 0 | 0 | 0 | 0 | 0 | 0 | 3  | 0 | 0 | 0 | 0 |
| 0 | 0 | 0 | 0 | 0 | 0 | 1  | 0 | 0 | 0 | 0 |
| 0 | 0 | 1 | 0 | 0 | 0 | 2  | 0 | 0 | 0 | 0 |
| 0 | 0 | 0 | 0 | 0 | 0 | 3  | 0 | 0 | 0 | 0 |
| 0 | 0 | 0 | 0 | 0 | 0 | 2  | 0 | 0 | 0 | 0 |
| 0 | 0 | 1 | 0 | 0 | 0 | 2  | 0 | 0 | 0 | 0 |
| 0 | 0 | 0 | 0 | 0 | 0 | 2  | 0 | 0 | 0 | 0 |
| 0 | 0 | 0 | 1 | 0 | 0 | 4  | 0 | 0 | 0 | 0 |
| 0 | 0 | 2 | 0 | 0 | 0 | 8  | 0 | 0 | 0 | 0 |
| 0 | 0 | 4 | 0 | 0 | 0 | 0  | 0 | 0 | 0 | 0 |
| 0 | 0 | 1 | 1 | 1 | 0 | 7  | 0 | 0 | 0 | 0 |



|   |   |   |   |   |   |    |   |   |   |   |
|---|---|---|---|---|---|----|---|---|---|---|
| 0 | 0 | 0 | 0 | 0 | 0 | 9  | 0 | 0 | 0 | 0 |
| 0 | 0 | 0 | 0 | 0 | 0 | 4  | 0 | 0 | 0 | 0 |
| 0 | 0 | 0 | 0 | 0 | 1 | 8  | 0 | 0 | 0 | 0 |
| 0 | 0 | 1 | 0 | 0 | 0 | 4  | 0 | 0 | 0 | 0 |
| 0 | 0 | 0 | 0 | 0 | 0 | 6  | 0 | 0 | 0 | 0 |
| 0 | 0 | 0 | 0 | 0 | 0 | 3  | 0 | 0 | 0 | 0 |
| 0 | 0 | 3 | 0 | 3 | 0 | 4  | 0 | 0 | 0 | 0 |
| 0 | 0 | 0 | 0 | 0 | 0 | 9  | 0 | 0 | 0 | 0 |
| 0 | 0 | 1 | 0 | 0 | 0 | 4  | 0 | 0 | 0 | 0 |
| 0 | 0 | 1 | 0 | 0 | 0 | 6  | 0 | 0 | 0 | 0 |
| 0 | 0 | 0 | 0 | 0 | 0 | 5  | 0 | 0 | 0 | 0 |
| 0 | 0 | 0 | 0 | 0 | 0 | 6  | 0 | 0 | 0 | 0 |
| 0 | 0 | 2 | 0 | 0 | 1 | 5  | 0 | 0 | 0 | 0 |
| 0 | 0 | 0 | 0 | 0 | 0 | 3  | 0 | 0 | 0 | 0 |
| 0 | 0 | 0 | 0 | 0 | 0 | 5  | 0 | 0 | 0 | 0 |
| 0 | 0 | 0 | 0 | 0 | 0 | 1  | 0 | 0 | 0 | 0 |
| 0 | 0 | 1 | 0 | 1 | 0 | 4  | 0 | 0 | 0 | 0 |
| 0 | 0 | 0 | 0 | 2 | 0 | 4  | 0 | 0 | 0 | 0 |
| 0 | 0 | 0 | 0 | 0 | 0 | 3  | 0 | 0 | 0 | 0 |
| 0 | 0 | 0 | 0 | 0 | 0 | 1  | 0 | 0 | 0 | 0 |
| 0 | 0 | 0 | 0 | 0 | 0 | 1  | 0 | 0 | 0 | 0 |
| 0 | 0 | 4 | 0 | 0 | 0 | 3  | 0 | 0 | 0 | 0 |
| 0 | 0 | 1 | 0 | 0 | 0 | 3  | 0 | 0 | 0 | 0 |
| 0 | 0 | 2 | 0 | 0 | 0 | 5  | 0 | 0 | 0 | 0 |
| 1 | 0 | 0 | 0 | 0 | 0 | 2  | 0 | 0 | 0 | 0 |
| 0 | 0 | 4 | 0 | 0 | 1 | 10 | 0 | 0 | 0 | 0 |
| 0 | 0 | 0 | 0 | 0 | 0 | 4  | 0 | 0 | 0 | 0 |
| 0 | 0 | 4 | 0 | 0 | 0 | 3  | 0 | 0 | 0 | 0 |

|   |   |   |   |   |   |    |   |   |   |   |   |
|---|---|---|---|---|---|----|---|---|---|---|---|
| 0 | 0 | 0 | 0 | 0 | 0 | 0  | 0 | 0 | 0 | 0 | 0 |
| 0 | 0 | 1 | 0 | 0 | 0 | 7  | 0 | 0 | 0 | 0 | 0 |
| 0 | 0 | 0 | 0 | 0 | 0 | 2  | 0 | 0 | 0 | 0 | 0 |
| 0 | 0 | 1 | 0 | 0 | 1 | 17 | 0 | 0 | 0 | 0 | 0 |
| 0 | 0 | 0 | 0 | 0 | 0 | 8  | 0 | 0 | 0 | 0 | 0 |
| 0 | 0 | 2 | 0 | 0 | 0 | 14 | 0 | 0 | 0 | 0 | 0 |
| 0 | 0 | 2 | 0 | 0 | 0 | 13 | 0 | 0 | 0 | 0 | 0 |
| 0 | 0 | 1 | 0 | 0 | 0 | 6  | 0 | 0 | 0 | 0 | 0 |
| 0 | 0 | 1 | 0 | 0 | 0 | 5  | 0 | 0 | 0 | 0 | 0 |
| 0 | 0 | 0 | 0 | 0 | 0 | 17 | 0 | 0 | 0 | 0 | 0 |
| 0 | 0 | 0 | 0 | 0 | 0 | 2  | 0 | 0 | 0 | 0 | 0 |
| 0 | 0 | 2 | 0 | 0 | 0 | 7  | 0 | 0 | 0 | 0 | 0 |
| 0 | 0 | 2 | 0 | 0 | 0 | 3  | 0 | 0 | 0 | 0 | 0 |
| 0 | 0 | 3 | 0 | 0 | 0 | 15 | 0 | 0 | 0 | 0 | 0 |
| 0 | 0 | 1 | 0 | 0 | 0 | 5  | 0 | 0 | 0 | 0 | 0 |
| 0 | 0 | 1 | 0 | 0 | 0 | 11 | 0 | 0 | 0 | 0 | 0 |
| 0 | 0 | 0 | 0 | 0 | 0 | 3  | 0 | 0 | 0 | 0 | 0 |
| 0 | 0 | 3 | 0 | 0 | 0 | 11 | 0 | 0 | 0 | 0 | 0 |
| 0 | 0 | 0 | 0 | 0 | 0 | 13 | 0 | 0 | 0 | 0 | 0 |
| 0 | 0 | 2 | 0 | 0 | 0 | 8  | 0 | 0 | 0 | 0 | 0 |
| 0 | 0 | 1 | 0 | 0 | 0 | 7  | 0 | 0 | 0 | 0 | 0 |
| 0 | 0 | 0 | 0 | 0 | 0 | 0  | 0 | 0 | 0 | 0 | 0 |
| 0 | 0 | 1 | 0 | 0 | 1 | 28 | 0 | 0 | 0 | 0 | 0 |
| 0 | 0 | 0 | 0 | 0 | 0 | 9  | 0 | 0 | 0 | 0 | 0 |
| 0 | 0 | 1 | 0 | 0 | 0 | 15 | 0 | 0 | 0 | 0 | 0 |
| 1 | 0 | 1 | 0 | 0 | 0 | 10 | 0 | 0 | 0 | 0 | 0 |
| 0 | 0 | 0 | 0 | 0 | 0 | 7  | 0 | 0 | 0 | 0 | 0 |
| 0 | 0 | 0 | 0 | 0 | 0 | 11 | 0 | 0 | 0 | 0 | 0 |
| 0 | 0 | 2 | 0 | 0 | 0 | 7  | 0 | 0 | 0 | 0 | 0 |

|   |   |   |   |   |   |    |   |   |   |   |
|---|---|---|---|---|---|----|---|---|---|---|
| 0 | 0 | 1 | 0 | 0 | 1 | 9  | 0 | 0 | 0 | 0 |
| 0 | 0 | 0 | 0 | 0 | 0 | 14 | 0 | 0 | 0 | 0 |
| 0 | 0 | 0 | 0 | 0 | 0 | 10 | 0 | 0 | 0 | 0 |
| 0 | 0 | 1 | 0 | 0 | 1 | 17 | 0 | 0 | 0 | 0 |
| 0 | 0 | 0 | 0 | 0 | 0 | 12 | 0 | 0 | 0 | 0 |
| 0 | 0 | 1 | 0 | 0 | 0 | 20 | 0 | 0 | 0 | 0 |
| 0 | 0 | 0 | 0 | 0 | 0 | 7  | 0 | 0 | 0 | 0 |
| 0 | 0 | 0 | 0 | 0 | 0 | 6  | 0 | 0 | 0 | 0 |
| 0 | 0 | 0 | 0 | 0 | 0 | 2  | 0 | 0 | 0 | 0 |
| 0 | 0 | 0 | 0 | 0 | 1 | 9  | 0 | 0 | 0 | 0 |
| 0 | 0 | 0 | 0 | 0 | 0 | 11 | 0 | 0 | 0 | 0 |
| 0 | 0 | 0 | 0 | 0 | 0 | 27 | 0 | 0 | 0 | 0 |
| 0 | 0 | 0 | 0 | 0 | 0 | 18 | 0 | 0 | 0 | 0 |
| 0 | 0 | 0 | 0 | 0 | 0 | 15 | 0 | 0 | 0 | 0 |
| 0 | 0 | 0 | 0 | 0 | 0 | 12 | 0 | 0 | 0 | 0 |
| 0 | 0 | 0 | 0 | 0 | 0 | 8  | 0 | 0 | 0 | 0 |
| 0 | 0 | 0 | 0 | 0 | 0 | 11 | 0 | 0 | 0 | 0 |
| 0 | 0 | 3 | 0 | 0 | 0 | 11 | 0 | 0 | 0 | 0 |
| 0 | 0 | 0 | 0 | 0 | 0 | 17 | 0 | 0 | 0 | 0 |
| 0 | 0 | 0 | 0 | 0 | 0 | 12 | 0 | 0 | 0 | 0 |
| 0 | 0 | 0 | 0 | 0 | 0 | 15 | 0 | 0 | 0 | 0 |
| 0 | 0 | 0 | 0 | 0 | 0 | 14 | 0 | 0 | 0 | 0 |
| 0 | 0 | 1 | 0 | 0 | 0 | 15 | 0 | 0 | 0 | 0 |
| 0 | 0 | 3 | 0 | 0 | 0 | 14 | 0 | 0 | 0 | 0 |
| 0 | 0 | 0 | 0 | 0 | 0 | 14 | 0 | 0 | 0 | 0 |
| 0 | 0 | 0 | 0 | 0 | 0 | 20 | 0 | 0 | 0 | 0 |
| 0 | 0 | 2 | 0 | 0 | 0 | 12 | 0 | 0 | 0 | 0 |
| 1 | 0 | 4 | 0 | 0 | 0 | 12 | 0 | 0 | 0 | 0 |
| 0 | 0 | 1 | 0 | 0 | 0 | 7  | 0 | 0 | 1 | 0 |

|   |   |   |   |   |   |    |   |   |   |   |
|---|---|---|---|---|---|----|---|---|---|---|
| 0 | 0 | 0 | 0 | 0 | 0 | 6  | 0 | 0 | 0 | 0 |
| 0 | 0 | 0 | 0 | 0 | 0 | 11 | 0 | 0 | 0 | 0 |
| 1 | 0 | 1 | 0 | 0 | 0 | 12 | 0 | 0 | 0 | 0 |
| 0 | 0 | 3 | 0 | 0 | 0 | 11 | 0 | 0 | 0 | 0 |
| 0 | 0 | 0 | 0 | 0 | 0 | 3  | 0 | 0 | 0 | 0 |
| 0 | 0 | 1 | 0 | 0 | 0 | 6  | 0 | 0 | 0 | 0 |
| 0 | 0 | 2 | 0 | 0 | 0 | 6  | 0 | 0 | 0 | 0 |
| 0 | 0 | 0 | 0 | 0 | 0 | 4  | 0 | 0 | 0 | 0 |
| 0 | 0 | 0 | 0 | 0 | 0 | 11 | 0 | 0 | 0 | 0 |
| 0 | 0 | 4 | 0 | 0 | 0 | 5  | 0 | 0 | 0 | 0 |
| 0 | 0 | 3 | 0 | 0 | 0 | 9  | 0 | 0 | 0 | 0 |
| 0 | 0 | 2 | 0 | 0 | 0 | 5  | 0 | 0 | 0 | 0 |
| 0 | 0 | 2 | 0 | 0 | 0 | 18 | 0 | 0 | 0 | 0 |
| 0 | 0 | 2 | 0 | 0 | 0 | 4  | 0 | 0 | 0 | 0 |
| 0 | 0 | 0 | 0 | 0 | 0 | 10 | 0 | 0 | 0 | 0 |
| 0 | 0 | 0 | 0 | 0 | 0 | 4  | 0 | 0 | 0 | 0 |
| 1 | 0 | 6 | 1 | 0 | 0 | 18 | 0 | 0 | 0 | 0 |
| 0 | 0 | 0 | 0 | 0 | 0 | 7  | 0 | 0 | 0 | 0 |
| 0 | 0 | 1 | 0 | 0 | 0 | 9  | 0 | 0 | 0 | 0 |
| 1 | 0 | 2 | 1 | 0 | 0 | 17 | 0 | 0 | 0 | 0 |
| 0 | 0 | 0 | 0 | 0 | 0 | 22 | 0 | 0 | 0 | 0 |
| 0 | 0 | 1 | 0 | 0 | 0 | 12 | 0 | 0 | 0 | 0 |
| 0 | 0 | 0 | 1 | 0 | 0 | 7  | 0 | 0 | 0 | 0 |
| 0 | 0 | 3 | 2 | 0 | 0 | 11 | 0 | 0 | 0 | 0 |
| 0 | 0 | 0 | 0 | 0 | 0 | 18 | 0 | 0 | 0 | 0 |
| 0 | 0 | 0 | 0 | 0 | 0 | 5  | 0 | 0 | 0 | 0 |
| 0 | 0 | 0 | 1 | 0 | 0 | 3  | 0 | 0 | 0 | 0 |
| 0 | 0 | 0 | 0 | 0 | 0 | 29 | 0 | 0 | 0 | 0 |
| 0 | 0 | 2 | 0 | 0 | 0 | 4  | 0 | 0 | 0 | 0 |

|   |   |   |   |   |   |    |   |   |   |   |
|---|---|---|---|---|---|----|---|---|---|---|
| 0 | 0 | 2 | 0 | 0 | 0 | 9  | 0 | 0 | 0 | 0 |
| 1 | 0 | 0 | 0 | 0 | 0 | 6  | 0 | 0 | 0 | 0 |
| 0 | 0 | 1 | 0 | 0 | 0 | 5  | 0 | 0 | 0 | 0 |
| 0 | 0 | 0 | 0 | 0 | 0 | 9  | 0 | 0 | 0 | 0 |
| 0 | 0 | 2 | 0 | 0 | 0 | 11 | 0 | 0 | 0 | 0 |
| 0 | 0 | 0 | 0 | 0 | 0 | 7  | 0 | 0 | 0 | 0 |
| 0 | 0 | 0 | 0 | 0 | 0 | 8  | 0 | 0 | 0 | 0 |
| 0 | 0 | 0 | 1 | 0 | 0 | 2  | 0 | 0 | 0 | 0 |
| 0 | 0 | 1 | 1 | 1 | 0 | 7  | 0 | 0 | 0 | 0 |
| 0 | 0 | 0 | 0 | 0 | 0 | 7  | 0 | 0 | 0 | 0 |
| 0 | 0 | 0 | 0 | 0 | 0 | 7  | 1 | 0 | 0 | 0 |
| 0 | 0 | 0 | 0 | 0 | 0 | 3  | 0 | 0 | 0 | 0 |
| 0 | 0 | 0 | 1 | 0 | 0 | 11 | 0 | 0 | 0 | 0 |
| 0 | 0 | 0 | 0 | 0 | 0 | 8  | 0 | 0 | 0 | 0 |
| 0 | 0 | 0 | 0 | 0 | 0 | 3  | 0 | 0 | 0 | 0 |
| 0 | 0 | 0 | 0 | 0 | 0 | 9  | 0 | 0 | 0 | 0 |
| 0 | 0 | 0 | 0 | 0 | 0 | 5  | 0 | 0 | 0 | 0 |
| 0 | 0 | 0 | 0 | 0 | 0 | 10 | 0 | 0 | 0 | 0 |
| 0 | 0 | 3 | 0 | 0 | 0 | 12 | 0 | 0 | 0 | 0 |
| 0 | 0 | 1 | 1 | 0 | 0 | 10 | 0 | 0 | 0 | 0 |
| 0 | 0 | 3 | 0 | 0 | 0 | 5  | 0 | 0 | 0 | 0 |
| 0 | 0 | 1 | 0 | 0 | 0 | 7  | 0 | 0 | 0 | 0 |
| 0 | 0 | 1 | 0 | 0 | 0 | 1  | 0 | 0 | 0 | 0 |
| 0 | 0 | 0 | 0 | 0 | 0 | 4  | 0 | 0 | 0 | 0 |
| 0 | 0 | 1 | 2 | 0 | 0 | 5  | 0 | 0 | 0 | 0 |
| 0 | 0 | 1 | 1 | 0 | 0 | 10 | 0 | 0 | 0 | 0 |
| 0 | 0 | 0 | 0 | 0 | 0 | 10 | 0 | 0 | 0 | 0 |
| 0 | 0 | 2 | 1 | 0 | 0 | 3  | 0 | 0 | 0 | 0 |
| 0 | 0 | 1 | 0 | 0 | 0 | 1  | 0 | 0 | 0 | 0 |

|   |   |   |   |   |   |    |   |   |   |   |
|---|---|---|---|---|---|----|---|---|---|---|
| 0 | 0 | 0 | 0 | 0 | 1 | 5  | 0 | 0 | 0 | 0 |
| 0 | 0 | 2 | 0 | 0 | 0 | 5  | 0 | 0 | 0 | 0 |
| 0 | 0 | 0 | 0 | 0 | 0 | 4  | 0 | 0 | 0 | 0 |
| 0 | 0 | 1 | 0 | 0 | 0 | 5  | 0 | 0 | 0 | 0 |
| 0 | 0 | 1 | 0 | 0 | 0 | 1  | 0 | 0 | 0 | 0 |
| 0 | 1 | 0 | 0 | 0 | 0 | 3  | 0 | 0 | 0 | 0 |
| 0 | 0 | 0 | 0 | 1 | 1 | 1  | 0 | 0 | 0 | 0 |
| 0 | 0 | 0 | 0 | 0 | 0 | 5  | 0 | 0 | 0 | 0 |
| 0 | 0 | 0 | 0 | 0 | 0 | 2  | 0 | 0 | 0 | 0 |
| 0 | 1 | 0 | 0 | 0 | 1 | 14 | 0 | 0 | 0 | 0 |
| 0 | 0 | 0 | 0 | 0 | 0 | 1  | 0 | 0 | 0 | 0 |
| 0 | 0 | 3 | 0 | 0 | 2 | 5  | 0 | 0 | 0 | 0 |
| 0 | 0 | 0 | 0 | 0 | 0 | 7  | 0 | 0 | 0 | 0 |
| 0 | 0 | 0 | 2 | 0 | 0 | 2  | 0 | 0 | 0 | 0 |
| 0 | 0 | 0 | 2 | 0 | 0 | 3  | 0 | 0 | 0 | 0 |
| 0 | 0 | 1 | 0 | 0 | 0 | 3  | 0 | 0 | 0 | 0 |
| 2 | 0 | 0 | 0 | 0 | 0 | 0  | 0 | 0 | 0 | 0 |
| 0 | 0 | 1 | 0 | 0 | 0 | 3  | 0 | 0 | 0 | 0 |
| 0 | 0 | 1 | 0 | 0 | 0 | 1  | 0 | 0 | 0 | 0 |

| micten | mysiad | nemato | nemert | neosin | nicaes | notoma | notsca | nuchar | olifat | olithi |
|--------|--------|--------|--------|--------|--------|--------|--------|--------|--------|--------|
| 0      | 0      | 0      | 0      | 0      | 1      | 1      | 2      | 0      | 0      | 0      |
| 0      | 0      | 0      | 0      | 0      | 0      | 0      | 0      | 0      | 0      | 2      |
| 0      | 0      | 0      | 3      | 0      | 1      | 0      | 0      | 0      | 0      | 1      |
| 0      | 0      | 0      | 1      | 0      | 0      | 3      | 1      | 0      | 0      | 0      |
| 0      | 0      | 0      | 0      | 0      | 1      | 0      | 1      | 0      | 0      | 0      |
| 0      | 0      | 0      | 1      | 0      | 6      | 0      | 2      | 0      | 0      | 0      |
| 0      | 0      | 0      | 1      | 0      | 0      | 0      | 0      | 0      | 0      | 0      |
| 0      | 0      | 1      | 4      | 0      | 0      | 0      | 2      | 0      | 0      | 0      |

|   |   |   |   |   |   |   |    |   |   |   |   |
|---|---|---|---|---|---|---|----|---|---|---|---|
| 0 | 0 | 0 | 0 | 0 | 0 | 0 | 0  | 0 | 0 | 0 | 1 |
| 0 | 0 | 0 | 1 | 0 | 0 | 0 | 0  | 0 | 0 | 0 | 1 |
| 0 | 0 | 0 | 0 | 0 | 1 | 0 | 0  | 0 | 0 | 0 | 0 |
| 0 | 0 | 0 | 0 | 0 | 0 | 0 | 0  | 8 | 0 | 0 | 0 |
| 1 | 0 | 0 | 2 | 0 | 0 | 1 | 2  | 0 | 0 | 0 | 0 |
| 0 | 0 | 0 | 5 | 0 | 0 | 0 | 4  | 0 | 0 | 0 | 0 |
| 0 | 0 | 0 | 1 | 0 | 0 | 0 | 6  | 0 | 0 | 2 | 0 |
| 0 | 0 | 0 | 2 | 0 | 0 | 0 | 9  | 0 | 0 | 1 | 0 |
| 1 | 0 | 0 | 1 | 0 | 0 | 0 | 10 | 0 | 0 | 1 | 0 |
| 0 | 0 | 0 | 2 | 0 | 0 | 0 | 10 | 0 | 0 | 1 | 0 |
| 0 | 0 | 0 | 3 | 0 | 0 | 0 | 8  | 0 | 0 | 0 | 0 |
| 0 | 0 | 0 | 1 | 0 | 0 | 0 | 2  | 0 | 0 | 0 | 0 |
| 0 | 0 | 0 | 0 | 0 | 2 | 0 | 0  | 0 | 0 | 2 | 0 |
| 0 | 0 | 0 | 1 | 0 | 0 | 0 | 0  | 0 | 0 | 0 | 0 |
| 0 | 0 | 0 | 2 | 0 | 0 | 0 | 0  | 0 | 0 | 0 | 0 |
| 0 | 0 | 0 | 1 | 0 | 0 | 0 | 1  | 0 | 0 | 0 | 0 |
| 0 | 1 | 0 | 2 | 0 | 0 | 0 | 0  | 0 | 0 | 0 | 0 |
| 0 | 1 | 0 | 1 | 0 | 0 | 0 | 0  | 0 | 0 | 2 | 0 |
| 0 | 0 | 0 | 1 | 0 | 0 | 0 | 0  | 0 | 0 | 0 | 0 |
| 0 | 0 | 0 | 2 | 0 | 5 | 0 | 1  | 0 | 0 | 0 | 0 |
| 0 | 0 | 0 | 2 | 0 | 0 | 0 | 0  | 0 | 0 | 0 | 0 |
| 0 | 0 | 0 | 2 | 0 | 1 | 0 | 2  | 0 | 0 | 0 | 0 |
| 0 | 0 | 0 | 0 | 0 | 5 | 0 | 0  | 0 | 0 | 0 | 0 |
| 0 | 0 | 0 | 5 | 0 | 2 | 0 | 0  | 0 | 0 | 1 | 0 |
| 0 | 0 | 0 | 1 | 0 | 4 | 0 | 0  | 0 | 0 | 0 | 0 |
| 0 | 0 | 0 | 0 | 0 | 2 | 0 | 2  | 0 | 0 | 0 | 0 |
| 0 | 0 | 0 | 0 | 0 | 1 | 0 | 0  | 0 | 0 | 0 | 0 |
| 0 | 0 | 0 | 0 | 0 | 0 | 0 | 1  | 2 | 0 | 0 | 0 |
| 0 | 0 | 0 | 1 | 0 | 0 | 0 | 2  | 0 | 0 | 0 | 0 |

|   |   |   |   |   |   |   |   |   |   |   |
|---|---|---|---|---|---|---|---|---|---|---|
| 0 | 0 | 0 | 1 | 0 | 0 | 0 | 0 | 0 | 0 | 0 |
| 0 | 0 | 0 | 0 | 0 | 0 | 0 | 0 | 0 | 0 | 0 |
| 0 | 0 | 0 | 1 | 0 | 0 | 0 | 0 | 0 | 0 | 0 |
| 0 | 0 | 0 | 2 | 0 | 0 | 0 | 1 | 0 | 0 | 0 |
| 0 | 0 | 0 | 1 | 0 | 0 | 0 | 0 | 0 | 0 | 0 |
| 0 | 0 | 0 | 2 | 0 | 0 | 0 | 1 | 0 | 0 | 1 |
| 0 | 0 | 0 | 0 | 0 | 0 | 0 | 0 | 0 | 0 | 0 |
| 0 | 0 | 0 | 0 | 0 | 0 | 0 | 0 | 0 | 0 | 0 |
| 0 | 0 | 0 | 2 | 0 | 0 | 0 | 0 | 0 | 0 | 0 |
| 0 | 0 | 0 | 1 | 0 | 0 | 0 | 0 | 0 | 0 | 0 |
| 0 | 0 | 0 | 0 | 0 | 0 | 0 | 0 | 0 | 0 | 0 |
| 0 | 0 | 0 | 2 | 0 | 0 | 0 | 0 | 0 | 0 | 0 |
| 0 | 0 | 0 | 1 | 0 | 0 | 0 | 0 | 0 | 0 | 0 |
| 0 | 0 | 0 | 1 | 0 | 0 | 0 | 0 | 0 | 0 | 0 |
| 0 | 0 | 0 | 1 | 0 | 0 | 0 | 0 | 0 | 0 | 0 |
| 0 | 0 | 0 | 1 | 0 | 0 | 0 | 0 | 0 | 0 | 0 |
| 0 | 0 | 0 | 1 | 0 | 0 | 0 | 1 | 0 | 0 | 0 |
| 0 | 0 | 0 | 3 | 0 | 0 | 0 | 0 | 0 | 0 | 0 |
| 0 | 0 | 0 | 2 | 0 | 1 | 0 | 0 | 0 | 0 | 0 |
| 0 | 0 | 0 | 2 | 0 | 0 | 0 | 0 | 0 | 0 | 0 |
| 0 | 0 | 0 | 1 | 0 | 1 | 0 | 0 | 0 | 0 | 0 |
| 0 | 0 | 0 | 2 | 0 | 0 | 0 | 0 | 0 | 0 | 0 |
| 0 | 0 | 0 | 0 | 0 | 0 | 0 | 1 | 0 | 0 | 0 |
| 0 | 0 | 0 | 0 | 0 | 0 | 0 | 0 | 0 | 0 | 0 |
| 0 | 0 | 0 | 0 | 0 | 0 | 0 | 1 | 0 | 0 | 0 |
| 0 | 0 | 0 | 1 | 0 | 0 | 0 | 1 | 0 | 0 | 0 |
| 0 | 0 | 0 | 0 | 0 | 0 | 0 | 0 | 0 | 0 | 0 |
| 0 | 0 | 0 | 0 | 0 | 0 | 0 | 0 | 0 | 0 | 0 |
| 0 | 0 | 0 | 0 | 0 | 0 | 0 | 0 | 0 | 0 | 0 |
| 0 | 0 | 0 | 1 | 0 | 0 | 0 | 0 | 0 | 0 | 0 |



|   |   |   |   |   |   |   |   |   |   |
|---|---|---|---|---|---|---|---|---|---|
| 0 | 0 | 0 | 0 | 0 | 0 | 0 | 0 | 0 | 0 |
| 0 | 1 | 0 | 0 | 0 | 0 | 0 | 0 | 0 | 0 |
| 0 | 1 | 0 | 0 | 0 | 1 | 0 | 0 | 0 | 0 |
| 0 | 0 | 0 | 0 | 0 | 0 | 0 | 0 | 0 | 0 |
| 0 | 0 | 0 | 1 | 0 | 0 | 0 | 0 | 0 | 0 |
| 0 | 0 | 0 | 0 | 0 | 0 | 0 | 0 | 0 | 0 |
| 0 | 1 | 0 | 2 | 0 | 0 | 0 | 0 | 0 | 0 |
| 0 | 0 | 0 | 2 | 0 | 0 | 0 | 0 | 0 | 0 |
| 0 | 0 | 0 | 6 | 0 | 1 | 0 | 0 | 0 | 0 |
| 0 | 0 | 0 | 0 | 0 | 0 | 0 | 0 | 0 | 0 |
| 0 | 0 | 0 | 0 | 0 | 0 | 0 | 0 | 0 | 0 |
| 0 | 0 | 0 | 0 | 0 | 0 | 0 | 0 | 0 | 0 |
| 0 | 0 | 0 | 1 | 0 | 0 | 0 | 0 | 0 | 0 |
| 0 | 0 | 0 | 2 | 0 | 0 | 0 | 0 | 0 | 0 |
| 0 | 0 | 0 | 1 | 0 | 0 | 1 | 0 | 0 | 0 |
| 0 | 0 | 0 | 0 | 0 | 0 | 0 | 0 | 0 | 0 |
| 0 | 0 | 0 | 0 | 0 | 0 | 0 | 0 | 0 | 0 |
| 0 | 0 | 0 | 3 | 0 | 1 | 0 | 0 | 1 | 0 |
| 0 | 0 | 0 | 2 | 0 | 0 | 0 | 0 | 0 | 0 |
| 0 | 0 | 0 | 2 | 0 | 0 | 0 | 0 | 0 | 0 |
| 0 | 0 | 0 | 0 | 0 | 0 | 0 | 0 | 0 | 0 |
| 0 | 0 | 0 | 2 | 0 | 0 | 1 | 0 | 0 | 0 |
| 0 | 0 | 0 | 2 | 0 | 0 | 0 | 0 | 0 | 0 |
| 0 | 0 | 0 | 1 | 0 | 1 | 0 | 0 | 1 | 0 |
| 0 | 0 | 0 | 0 | 0 | 0 | 0 | 0 | 0 | 0 |
| 0 | 0 | 0 | 0 | 0 | 0 | 0 | 2 | 0 | 0 |
| 0 | 0 | 0 | 2 | 0 | 0 | 1 | 0 | 0 | 0 |
| 0 | 0 | 0 | 1 | 0 | 0 | 0 | 0 | 0 | 0 |
| 0 | 0 | 0 | 3 | 0 | 0 | 2 | 0 | 1 | 0 |

|   |   |   |   |   |   |   |   |    |   |   |
|---|---|---|---|---|---|---|---|----|---|---|
| 0 | 0 | 0 | 2 | 0 | 0 | 0 | 1 | 4  | 0 | 0 |
| 0 | 0 | 0 | 0 | 0 | 0 | 0 | 0 | 1  | 0 | 1 |
| 0 | 0 | 0 | 2 | 0 | 0 | 0 | 0 | 0  | 0 | 0 |
| 0 | 0 | 0 | 1 | 0 | 0 | 0 | 0 | 2  | 0 | 1 |
| 0 | 0 | 0 | 0 | 1 | 0 | 0 | 0 | 4  | 0 | 0 |
| 0 | 0 | 0 | 0 | 0 | 0 | 0 | 0 | 3  | 0 | 0 |
| 0 | 0 | 0 | 1 | 0 | 0 | 0 | 0 | 2  | 0 | 0 |
| 0 | 0 | 0 | 0 | 0 | 0 | 0 | 0 | 16 | 0 | 0 |
| 0 | 0 | 0 | 4 | 0 | 0 | 0 | 0 | 15 | 0 | 0 |
| 0 | 0 | 0 | 1 | 0 | 0 | 0 | 0 | 10 | 0 | 0 |
| 0 | 0 | 0 | 3 | 0 | 0 | 0 | 0 | 5  | 0 | 0 |
| 0 | 0 | 0 | 3 | 0 | 0 | 0 | 0 | 11 | 0 | 0 |
| 0 | 0 | 0 | 0 | 0 | 0 | 0 | 1 | 13 | 0 | 0 |
| 1 | 0 | 0 | 0 | 0 | 0 | 0 | 0 | 20 | 0 | 0 |
| 1 | 0 | 0 | 2 | 0 | 0 | 0 | 0 | 5  | 0 | 0 |
| 0 | 0 | 0 | 1 | 0 | 1 | 0 | 0 | 14 | 0 | 0 |
| 0 | 0 | 0 | 3 | 0 | 1 | 0 | 0 | 0  | 0 | 0 |
| 3 | 0 | 0 | 0 | 0 | 0 | 0 | 0 | 12 | 0 | 0 |
| 0 | 0 | 0 | 0 | 0 | 0 | 0 | 0 | 4  | 0 | 0 |
| 0 | 0 | 0 | 2 | 0 | 0 | 0 | 1 | 0  | 0 | 0 |
| 0 | 0 | 0 | 0 | 1 | 0 | 0 | 0 | 0  | 0 | 0 |
| 1 | 0 | 0 | 1 | 0 | 0 | 0 | 0 | 2  | 0 | 0 |
| 0 | 0 | 0 | 2 | 0 | 1 | 0 | 0 | 0  | 0 | 0 |
| 0 | 0 | 0 | 4 | 0 | 0 | 0 | 0 | 0  | 0 | 0 |
| 0 | 0 | 0 | 2 | 0 | 0 | 0 | 0 | 0  | 0 | 0 |
| 0 | 0 | 0 | 1 | 0 | 0 | 0 | 0 | 0  | 0 | 0 |
| 0 | 0 | 0 | 0 | 0 | 0 | 0 | 0 | 0  | 0 | 0 |
| 0 | 0 | 0 | 0 | 0 | 0 | 0 | 1 | 1  | 0 | 0 |
| 0 | 0 | 0 | 0 | 0 | 1 | 0 | 1 | 0  | 0 | 0 |



|   |   |   |   |   |   |   |   |   |   |   |
|---|---|---|---|---|---|---|---|---|---|---|
| 0 | 0 | 0 | 0 | 0 | 0 | 0 | 1 | 0 | 0 | 0 |
| 0 | 0 | 0 | 0 | 0 | 0 | 0 | 0 | 0 | 0 | 0 |
| 0 | 0 | 0 | 1 | 0 | 0 | 0 | 2 | 0 | 0 | 0 |
| 0 | 0 | 0 | 1 | 0 | 0 | 0 | 0 | 0 | 0 | 0 |
| 0 | 0 | 0 | 1 | 0 | 0 | 0 | 0 | 0 | 0 | 0 |
| 0 | 0 | 0 | 0 | 0 | 0 | 0 | 1 | 0 | 0 | 0 |
| 0 | 0 | 0 | 0 | 0 | 0 | 0 | 0 | 0 | 0 | 0 |
| 0 | 0 | 0 | 1 | 0 | 0 | 0 | 0 | 0 | 0 | 0 |
| 0 | 0 | 0 | 1 | 0 | 0 | 0 | 0 | 0 | 0 | 0 |
| 0 | 0 | 0 | 1 | 0 | 0 | 0 | 0 | 0 | 0 | 0 |
| 0 | 0 | 0 | 2 | 0 | 0 | 0 | 0 | 0 | 0 | 0 |
| 0 | 0 | 0 | 1 | 0 | 0 | 0 | 1 | 0 | 0 | 0 |
| 0 | 0 | 0 | 0 | 0 | 1 | 1 | 0 | 0 | 0 | 0 |
| 0 | 0 | 0 | 1 | 0 | 0 | 0 | 0 | 0 | 0 | 0 |
| 0 | 0 | 0 | 2 | 0 | 0 | 0 | 0 | 0 | 0 | 0 |
| 0 | 0 | 0 | 2 | 0 | 0 | 0 | 1 | 0 | 0 | 0 |
| 0 | 0 | 0 | 0 | 0 | 1 | 0 | 0 | 0 | 0 | 0 |
| 0 | 0 | 0 | 5 | 0 | 0 | 0 | 0 | 0 | 0 | 1 |
| 0 | 0 | 0 | 1 | 0 | 0 | 0 | 0 | 0 | 0 | 0 |
| 0 | 0 | 0 | 0 | 0 | 0 | 0 | 0 | 0 | 0 | 1 |
| 0 | 0 | 0 | 2 | 0 | 0 | 0 | 0 | 0 | 0 | 0 |
| 0 | 0 | 0 | 1 | 0 | 0 | 0 | 1 | 0 | 0 | 0 |
| 0 | 0 | 0 | 0 | 0 | 0 | 0 | 0 | 0 | 0 | 1 |
| 0 | 0 | 0 | 1 | 0 | 0 | 0 | 0 | 0 | 0 | 0 |
| 0 | 0 | 0 | 0 | 0 | 0 | 0 | 1 | 0 | 0 | 0 |
| 0 | 0 | 0 | 0 | 0 | 1 | 0 | 3 | 0 | 0 | 0 |
| 0 | 0 | 0 | 2 | 0 | 0 | 0 | 1 | 0 | 0 | 1 |
| 0 | 0 | 0 | 0 | 0 | 0 | 0 | 1 | 0 | 0 | 0 |
| 0 | 0 | 0 | 1 | 0 | 0 | 0 | 0 | 0 | 0 | 1 |

|   |   |   |   |   |   |   |   |   |   |   |
|---|---|---|---|---|---|---|---|---|---|---|
| 0 | 0 | 0 | 4 | 0 | 0 | 0 | 4 | 0 | 0 | 1 |
| 0 | 0 | 0 | 0 | 0 | 0 | 0 | 4 | 0 | 0 | 0 |
| 0 | 0 | 0 | 1 | 0 | 1 | 0 | 0 | 0 | 0 | 0 |
| 0 | 0 | 0 | 3 | 0 | 0 | 0 | 0 | 0 | 0 | 1 |
| 0 | 0 | 0 | 0 | 0 | 0 | 0 | 1 | 0 | 0 | 0 |
| 0 | 0 | 0 | 3 | 0 | 0 | 0 | 1 | 0 | 0 | 0 |
| 0 | 0 | 0 | 0 | 0 | 0 | 0 | 0 | 0 | 0 | 0 |
| 0 | 0 | 0 | 0 | 0 | 0 | 0 | 0 | 0 | 0 | 0 |
| 0 | 0 | 0 | 1 | 0 | 0 | 0 | 0 | 0 | 0 | 2 |
| 0 | 0 | 1 | 2 | 0 | 0 | 0 | 0 | 0 | 0 | 1 |
| 0 | 0 | 0 | 0 | 0 | 0 | 0 | 0 | 0 | 0 | 0 |
| 0 | 0 | 0 | 1 | 0 | 0 | 0 | 0 | 0 | 0 | 0 |
| 0 | 0 | 0 | 2 | 0 | 4 | 0 | 0 | 0 | 0 | 1 |
| 0 | 0 | 0 | 3 | 0 | 1 | 0 | 0 | 0 | 0 | 1 |
| 0 | 0 | 0 | 2 | 0 | 1 | 0 | 0 | 0 | 0 | 0 |
| 0 | 0 | 0 | 0 | 0 | 0 | 0 | 1 | 0 | 0 | 0 |
| 0 | 0 | 0 | 0 | 0 | 2 | 0 | 0 | 0 | 0 | 0 |
| 0 | 0 | 0 | 1 | 0 | 2 | 0 | 0 | 0 | 0 | 2 |
| 0 | 0 | 0 | 0 | 0 | 0 | 0 | 0 | 0 | 0 | 1 |
| 0 | 0 | 0 | 0 | 0 | 0 | 0 | 0 | 0 | 0 | 0 |
| 0 | 0 | 0 | 4 | 0 | 0 | 0 | 0 | 0 | 0 | 0 |
| 0 | 0 | 0 | 1 | 0 | 3 | 0 | 3 | 1 | 0 | 0 |
| 0 | 0 | 0 | 2 | 0 | 0 | 0 | 0 | 0 | 0 | 0 |
| 0 | 0 | 0 | 1 | 0 | 1 | 0 | 0 | 0 | 0 | 0 |
| 0 | 0 | 0 | 2 | 0 | 0 | 0 | 0 | 0 | 0 | 0 |
| 0 | 0 | 0 | 0 | 0 | 0 | 0 | 0 | 0 | 0 | 0 |
| 0 | 0 | 0 | 0 | 0 | 0 | 0 | 0 | 0 | 0 | 0 |
| 0 | 0 | 0 | 2 | 0 | 0 | 0 | 0 | 0 | 0 | 1 |
| 0 | 0 | 0 | 0 | 0 | 0 | 0 | 0 | 0 | 0 | 0 |
| 0 | 0 | 0 | 1 | 0 | 0 | 0 | 0 | 0 | 0 | 2 |
| 0 | 0 | 0 | 1 | 0 | 0 | 0 | 0 | 0 | 0 | 4 |



|   |   |   |   |   |   |   |   |   |   |   |
|---|---|---|---|---|---|---|---|---|---|---|
| 0 | 0 | 0 | 0 | 0 | 0 | 0 | 0 | 0 | 0 | 0 |
| 0 | 0 | 0 | 0 | 0 | 0 | 0 | 0 | 0 | 0 | 0 |
| 0 | 0 | 0 | 1 | 0 | 0 | 0 | 0 | 0 | 0 | 0 |
| 0 | 0 | 0 | 1 | 0 | 0 | 0 | 0 | 0 | 0 | 0 |
| 0 | 0 | 0 | 2 | 0 | 0 | 0 | 1 | 0 | 0 | 0 |
| 0 | 0 | 0 | 0 | 0 | 0 | 0 | 0 | 0 | 0 | 0 |
| 0 | 0 | 0 | 4 | 0 | 0 | 0 | 1 | 0 | 0 | 0 |
| 0 | 0 | 0 | 3 | 0 | 0 | 0 | 0 | 0 | 0 | 0 |
| 0 | 0 | 0 | 0 | 0 | 0 | 0 | 0 | 0 | 0 | 0 |
| 0 | 0 | 0 | 0 | 0 | 0 | 0 | 0 | 0 | 0 | 0 |
| 0 | 0 | 0 | 0 | 0 | 0 | 0 | 0 | 0 | 0 | 0 |
| 0 | 0 | 0 | 1 | 0 | 0 | 0 | 0 | 0 | 0 | 0 |
| 0 | 0 | 0 | 1 | 0 | 0 | 0 | 1 | 0 | 0 | 0 |
| 0 | 0 | 0 | 0 | 0 | 0 | 0 | 0 | 0 | 0 | 0 |
| 0 | 0 | 0 | 0 | 0 | 0 | 0 | 0 | 0 | 0 | 0 |
| 0 | 0 | 0 | 0 | 0 | 0 | 0 | 0 | 0 | 0 | 0 |
| 0 | 0 | 0 | 0 | 0 | 0 | 0 | 0 | 0 | 0 | 0 |
| 0 | 0 | 0 | 0 | 0 | 0 | 0 | 1 | 0 | 0 | 0 |
| 0 | 0 | 0 | 4 | 0 | 0 | 0 | 1 | 0 | 0 | 0 |
| 0 | 0 | 0 | 0 | 0 | 0 | 0 | 0 | 0 | 1 | 0 |
| 0 | 0 | 0 | 0 | 0 | 1 | 0 | 0 | 0 | 1 | 0 |
| 0 | 0 | 0 | 0 | 0 | 0 | 0 | 0 | 0 | 0 | 0 |
| 0 | 0 | 0 | 0 | 0 | 0 | 0 | 0 | 0 | 0 | 0 |
| 0 | 0 | 0 | 0 | 0 | 0 | 0 | 0 | 0 | 0 | 0 |
| 0 | 0 | 0 | 0 | 0 | 0 | 0 | 0 | 0 | 0 | 0 |
| 0 | 0 | 0 | 0 | 0 | 0 | 0 | 0 | 0 | 0 | 0 |
| 0 | 0 | 0 | 1 | 0 | 0 | 0 | 0 | 0 | 0 | 0 |
| 0 | 0 | 0 | 0 | 0 | 0 | 0 | 0 | 0 | 0 | 0 |
| 0 | 0 | 0 | 0 | 0 | 0 | 0 | 2 | 0 | 0 | 0 |
| 0 | 0 | 0 | 1 | 0 | 0 | 0 | 0 | 0 | 0 | 0 |

|   |   |   |   |   |   |   |   |    |   |   |   |
|---|---|---|---|---|---|---|---|----|---|---|---|
| 0 | 0 | 0 | 1 | 0 | 0 | 0 | 0 | 0  | 0 | 0 | 0 |
| 0 | 0 | 0 | 2 | 0 | 0 | 0 | 0 | 0  | 0 | 0 | 0 |
| 0 | 0 | 0 | 0 | 0 | 0 | 0 | 0 | 0  | 0 | 0 | 0 |
| 0 | 0 | 0 | 1 | 0 | 0 | 0 | 0 | 0  | 0 | 0 | 0 |
| 0 | 0 | 0 | 0 | 0 | 0 | 0 | 0 | 0  | 0 | 0 | 0 |
| 0 | 0 | 0 | 0 | 0 | 0 | 0 | 0 | 0  | 0 | 0 | 0 |
| 0 | 0 | 0 | 2 | 0 | 0 | 0 | 0 | 0  | 0 | 0 | 0 |
| 0 | 0 | 0 | 1 | 0 | 0 | 0 | 1 | 0  | 0 | 0 | 0 |
| 0 | 0 | 0 | 1 | 0 | 0 | 0 | 0 | 0  | 0 | 0 | 0 |
| 0 | 0 | 0 | 1 | 0 | 0 | 1 | 0 | 0  | 0 | 0 | 0 |
| 0 | 0 | 0 | 3 | 0 | 0 | 0 | 2 | 2  | 0 | 0 | 0 |
| 0 | 0 | 0 | 0 | 0 | 0 | 0 | 0 | 1  | 0 | 0 | 0 |
| 0 | 0 | 0 | 0 | 0 | 0 | 0 | 0 | 10 | 0 | 0 | 0 |
| 0 | 0 | 0 | 1 | 0 | 0 | 0 | 0 | 0  | 0 | 0 | 0 |
| 0 | 1 | 0 | 0 | 0 | 0 | 0 | 0 | 0  | 0 | 0 | 0 |
| 0 | 0 | 0 | 0 | 0 | 0 | 0 | 0 | 1  | 0 | 0 | 0 |
| 0 | 0 | 0 | 0 | 0 | 0 | 0 | 0 | 1  | 1 | 0 | 1 |
| 0 | 0 | 0 | 2 | 0 | 0 | 0 | 1 | 1  | 0 | 0 | 0 |
| 0 | 0 | 0 | 2 | 0 | 0 | 0 | 0 | 1  | 0 | 0 | 0 |
| 0 | 0 | 0 | 0 | 0 | 0 | 0 | 0 | 11 | 0 | 0 | 0 |
| 4 | 0 | 0 | 0 | 0 | 0 | 1 | 1 | 14 | 0 | 1 | 0 |
| 2 | 0 | 0 | 3 | 0 | 0 | 0 | 0 | 17 | 0 | 1 | 0 |
| 0 | 0 | 0 | 1 | 0 | 0 | 0 | 1 | 7  | 0 | 0 | 0 |
| 0 | 0 | 0 | 0 | 0 | 0 | 0 | 0 | 8  | 0 | 0 | 0 |
| 5 | 0 | 0 | 0 | 0 | 0 | 0 | 0 | 12 | 0 | 0 | 0 |
| 0 | 0 | 0 | 0 | 0 | 0 | 0 | 0 | 13 | 0 | 0 | 0 |
| 0 | 0 | 0 | 2 | 0 | 0 | 0 | 0 | 1  | 0 | 1 | 0 |
| 0 | 0 | 0 | 1 | 0 | 0 | 0 | 0 | 2  | 0 | 0 | 0 |
| 0 | 0 | 0 | 1 | 0 | 0 | 0 | 0 | 4  | 0 | 0 | 0 |



|   |   |   |   |   |   |   |   |    |   |   |
|---|---|---|---|---|---|---|---|----|---|---|
| 0 | 0 | 0 | 0 | 0 | 0 | 0 | 1 | 9  | 0 | 1 |
| 0 | 0 | 0 | 1 | 0 | 0 | 0 | 0 | 4  | 0 | 0 |
| 0 | 0 | 0 | 0 | 0 | 0 | 0 | 0 | 2  | 0 | 1 |
| 0 | 0 | 0 | 1 | 0 | 0 | 0 | 0 | 5  | 0 | 0 |
| 0 | 0 | 0 | 0 | 0 | 0 | 0 | 0 | 4  | 0 | 0 |
| 0 | 0 | 0 | 0 | 0 | 0 | 0 | 0 | 3  | 0 | 0 |
| 0 | 0 | 0 | 1 | 0 | 0 | 0 | 0 | 3  | 0 | 0 |
| 0 | 0 | 0 | 0 | 0 | 0 | 0 | 0 | 11 | 0 | 0 |
| 0 | 0 | 0 | 1 | 0 | 0 | 0 | 1 | 9  | 0 | 2 |
| 0 | 0 | 0 | 0 | 0 | 0 | 0 | 0 | 2  | 0 | 0 |
| 0 | 0 | 0 | 1 | 0 | 0 | 0 | 0 | 9  | 0 | 0 |
| 0 | 0 | 0 | 0 | 0 | 0 | 0 | 0 | 3  | 0 | 0 |
| 0 | 0 | 0 | 2 | 0 | 0 | 0 | 0 | 3  | 0 | 1 |
| 0 | 0 | 0 | 0 | 0 | 0 | 0 | 0 | 1  | 0 | 0 |
| 1 | 0 | 0 | 0 | 0 | 0 | 0 | 0 | 2  | 0 | 0 |
| 1 | 0 | 0 | 0 | 0 | 0 | 0 | 0 | 8  | 0 | 1 |
| 1 | 0 | 0 | 0 | 0 | 0 | 0 | 0 | 2  | 0 | 1 |
| 0 | 0 | 0 | 1 | 0 | 0 | 0 | 0 | 1  | 0 | 0 |
| 0 | 0 | 0 | 0 | 0 | 0 | 0 | 0 | 1  | 0 | 0 |
| 0 | 0 | 0 | 1 | 0 | 0 | 0 | 0 | 1  | 0 | 0 |
| 0 | 0 | 0 | 1 | 0 | 0 | 0 | 0 | 2  | 0 | 0 |
| 0 | 0 | 0 | 0 | 0 | 0 | 0 | 1 | 0  | 0 | 0 |
| 0 | 0 | 0 | 0 | 0 | 0 | 1 | 0 | 1  | 0 | 0 |
| 0 | 0 | 0 | 1 | 0 | 1 | 0 | 0 | 0  | 0 | 0 |
| 0 | 0 | 0 | 0 | 0 | 0 | 0 | 1 | 1  | 0 | 0 |
| 0 | 0 | 0 | 1 | 0 | 1 | 0 | 1 | 2  | 0 | 0 |
| 0 | 0 | 0 | 1 | 0 | 1 | 0 | 2 | 0  | 0 | 0 |
| 0 | 0 | 0 | 0 | 0 | 0 | 0 | 1 | 0  | 0 | 0 |
| 0 | 0 | 0 | 0 | 0 | 0 | 0 | 1 | 0  | 0 | 0 |



|   |   |   |   |   |   |   |   |   |   |   |
|---|---|---|---|---|---|---|---|---|---|---|
| 0 | 0 | 0 | 2 | 0 | 0 | 0 | 1 | 0 | 0 | 1 |
| 0 | 0 | 0 | 0 | 0 | 0 | 0 | 0 | 0 | 0 | 1 |
| 0 | 0 | 0 | 0 | 0 | 0 | 0 | 0 | 0 | 0 | 0 |
| 0 | 0 | 0 | 1 | 0 | 0 | 0 | 0 | 0 | 0 | 1 |
| 0 | 0 | 0 | 1 | 0 | 0 | 0 | 0 | 0 | 0 | 0 |
| 0 | 0 | 0 | 0 | 0 | 0 | 0 | 0 | 1 | 0 | 0 |
| 0 | 0 | 0 | 1 | 0 | 0 | 0 | 0 | 0 | 0 | 0 |
| 0 | 0 | 0 | 0 | 0 | 0 | 0 | 0 | 0 | 0 | 0 |
| 0 | 0 | 0 | 1 | 0 | 0 | 0 | 1 | 0 | 0 | 0 |
| 0 | 0 | 0 | 0 | 0 | 0 | 0 | 0 | 0 | 0 | 0 |
| 0 | 0 | 0 | 1 | 0 | 0 | 0 | 0 | 0 | 0 | 0 |
| 0 | 0 | 0 | 1 | 0 | 0 | 0 | 0 | 1 | 0 | 0 |
| 0 | 0 | 0 | 1 | 0 | 0 | 0 | 1 | 1 | 0 | 0 |
| 0 | 0 | 0 | 0 | 0 | 0 | 0 | 0 | 0 | 0 | 0 |
| 0 | 0 | 0 | 0 | 0 | 0 | 0 | 0 | 0 | 0 | 0 |
| 0 | 0 | 0 | 3 | 0 | 1 | 0 | 0 | 1 | 0 | 0 |
| 0 | 0 | 0 | 0 | 0 | 0 | 0 | 1 | 0 | 0 | 0 |
| 0 | 0 | 0 | 1 | 0 | 0 | 0 | 4 | 0 | 0 | 0 |
| 0 | 0 | 0 | 3 | 0 | 0 | 0 | 0 | 1 | 0 | 0 |
| 0 | 0 | 0 | 1 | 0 | 0 | 0 | 1 | 0 | 0 | 1 |
| 0 | 0 | 0 | 0 | 0 | 0 | 0 | 1 | 0 | 0 | 0 |
| 0 | 1 | 0 | 2 | 0 | 0 | 0 | 2 | 0 | 0 | 0 |
| 0 | 0 | 0 | 2 | 0 | 0 | 0 | 0 | 0 | 0 | 0 |
| 0 | 1 | 0 | 0 | 0 | 6 | 0 | 3 | 1 | 0 | 1 |
| 0 | 0 | 0 | 0 | 0 | 0 | 0 | 0 | 0 | 0 | 0 |
| 0 | 0 | 0 | 2 | 0 | 1 | 0 | 1 | 0 | 0 | 0 |
| 0 | 0 | 0 | 0 | 0 | 4 | 0 | 0 | 0 | 0 | 0 |
| 0 | 0 | 0 | 4 | 0 | 3 | 0 | 2 | 0 | 0 | 0 |
| 0 | 0 | 0 | 2 | 0 | 1 | 0 | 3 | 0 | 0 | 0 |



| hetfil | ischyr | laspar | lepido | levgra | limpul | lumbri | lysian | maclil | macste | magdak |   |
|--------|--------|--------|--------|--------|--------|--------|--------|--------|--------|--------|---|
| 1      | 0      | 0      | 0      | 0      | 0      | 0      | 0      | 0      | 10     | 0      | 2 |
| 0      | 0      | 0      | 0      | 0      | 0      | 1      | 0      | 0      | 8      | 0      | 5 |
| 3      | 0      | 0      | 0      | 0      | 0      | 0      | 0      | 0      | 6      | 0      | 3 |
| 3      | 0      | 0      | 0      | 0      | 0      | 0      | 0      | 0      | 11     | 0      | 2 |
| 1      | 0      | 0      | 0      | 0      | 0      | 0      | 0      | 0      | 0      | 0      | 6 |
| 1      | 0      | 0      | 0      | 0      | 0      | 0      | 0      | 0      | 2      | 0      | 2 |
| 0      | 0      | 0      | 0      | 0      | 0      | 0      | 0      | 0      | 5      | 0      | 5 |
| 1      | 0      | 0      | 0      | 0      | 0      | 0      | 0      | 0      | 4      | 8      | 0 |
| 4      | 0      | 0      | 0      | 0      | 0      | 0      | 0      | 0      | 1      | 1      | 1 |
| 4      | 0      | 0      | 0      | 0      | 0      | 0      | 0      | 0      | 2      | 3      | 2 |
| 2      | 0      | 0      | 0      | 0      | 0      | 0      | 0      | 0      | 2      | 7      | 1 |
| 2      | 0      | 0      | 0      | 0      | 0      | 0      | 0      | 0      | 5      | 3      | 2 |
| 3      | 0      | 0      | 0      | 0      | 0      | 0      | 0      | 0      | 1      | 2      | 4 |
| 0      | 0      | 0      | 0      | 0      | 0      | 0      | 0      | 0      | 2      | 1      | 1 |
| 1      | 0      | 0      | 0      | 0      | 0      | 0      | 0      | 0      | 1      | 2      | 1 |
| 2      | 0      | 0      | 0      | 0      | 0      | 0      | 0      | 0      | 1      | 1      | 0 |
| 1      | 0      | 0      | 0      | 0      | 0      | 0      | 0      | 0      | 6      | 0      | 8 |
| 1      | 0      | 0      | 0      | 0      | 0      | 0      | 0      | 0      | 3      | 0      | 1 |
| 0      | 0      | 0      | 0      | 0      | 0      | 0      | 0      | 0      | 2      | 2      | 4 |
| 3      | 0      | 0      | 0      | 0      | 0      | 0      | 0      | 0      | 2      | 3      | 4 |
| 1      | 0      | 0      | 0      | 0      | 0      | 0      | 0      | 0      | 2      | 1      | 2 |
| 0      | 0      | 0      | 0      | 0      | 0      | 0      | 0      | 0      | 5      | 6      | 3 |
| 3      | 0      | 1      | 0      | 0      | 0      | 0      | 0      | 0      | 17     | 0      | 2 |
| 3      | 0      | 0      | 0      | 0      | 0      | 0      | 0      | 0      | 9      | 0      | 5 |
| 2      | 1      | 0      | 0      | 0      | 0      | 0      | 0      | 0      | 3      | 4      | 0 |
| 4      | 0      | 0      | 0      | 0      | 0      | 0      | 0      | 0      | 4      | 2      | 2 |
| 0      | 0      | 0      | 0      | 0      | 0      | 0      | 0      | 0      | 3      | 0      | 3 |
| 0      | 0      | 0      | 0      | 0      | 0      | 0      | 0      | 0      | 3      | 2      | 1 |

|   |   |   |   |   |   |   |   |    |   |    |
|---|---|---|---|---|---|---|---|----|---|----|
| 0 | 0 | 0 | 0 | 0 | 0 | 0 | 0 | 3  | 0 | 0  |
| 0 | 0 | 0 | 0 | 0 | 0 | 0 | 0 | 6  | 0 | 1  |
| 2 | 0 | 0 | 0 | 0 | 0 | 0 | 0 | 1  | 1 | 0  |
| 2 | 0 | 0 | 0 | 0 | 0 | 0 | 0 | 4  | 1 | 1  |
| 3 | 0 | 0 | 0 | 0 | 0 | 0 | 0 | 2  | 6 | 2  |
| 1 | 0 | 0 | 0 | 0 | 0 | 0 | 0 | 3  | 4 | 0  |
| 1 | 0 | 0 | 0 | 0 | 0 | 0 | 0 | 3  | 0 | 0  |
| 0 | 0 | 0 | 0 | 0 | 0 | 0 | 0 | 1  | 1 | 1  |
| 0 | 0 | 0 | 0 | 0 | 0 | 0 | 0 | 7  | 2 | 0  |
| 0 | 0 | 0 | 0 | 0 | 0 | 0 | 0 | 1  | 0 | 0  |
| 1 | 0 | 0 | 0 | 0 | 0 | 0 | 0 | 5  | 1 | 0  |
| 1 | 0 | 0 | 1 | 0 | 0 | 0 | 0 | 5  | 2 | 3  |
| 4 | 0 | 0 | 0 | 0 | 0 | 0 | 0 | 8  | 4 | 4  |
| 1 | 0 | 0 | 0 | 0 | 0 | 0 | 0 | 7  | 3 | 1  |
| 0 | 0 | 0 | 0 | 0 | 0 | 0 | 0 | 10 | 0 | 0  |
| 0 | 0 | 0 | 0 | 0 | 0 | 0 | 0 | 9  | 0 | 0  |
| 2 | 0 | 0 | 0 | 0 | 0 | 0 | 3 | 6  | 1 | 0  |
| 3 | 0 | 0 | 0 | 0 | 0 | 0 | 0 | 3  | 0 | 4  |
| 3 | 0 | 0 | 0 | 0 | 0 | 0 | 0 | 8  | 1 | 0  |
| 2 | 0 | 0 | 0 | 0 | 0 | 0 | 0 | 6  | 2 | 0  |
| 0 | 0 | 0 | 0 | 0 | 0 | 0 | 0 | 6  | 0 | 0  |
| 1 | 0 | 0 | 0 | 0 | 0 | 0 | 0 | 9  | 4 | 0  |
| 5 | 0 | 0 | 0 | 0 | 0 | 0 | 0 | 6  | 0 | 12 |
| 1 | 0 | 0 | 0 | 0 | 0 | 0 | 0 | 1  | 1 | 0  |
| 0 | 0 | 0 | 0 | 0 | 0 | 0 | 0 | 1  | 0 | 0  |
| 0 | 0 | 0 | 0 | 0 | 0 | 0 | 0 | 0  | 0 | 0  |
| 0 | 0 | 0 | 0 | 0 | 0 | 0 | 0 | 1  | 2 | 0  |
| 1 | 0 | 0 | 0 | 0 | 0 | 0 | 0 | 0  | 2 | 1  |
| 0 | 0 | 0 | 0 | 0 | 0 | 0 | 1 | 7  | 3 | 0  |

|    |   |    |   |   |   |   |   |   |   |    |
|----|---|----|---|---|---|---|---|---|---|----|
| 11 | 0 | 0  | 0 | 0 | 0 | 0 | 0 | 8 | 0 | 6  |
| 0  | 0 | 0  | 0 | 0 | 0 | 0 | 0 | 1 | 3 | 1  |
| 6  | 0 | 0  | 0 | 0 | 0 | 0 | 0 | 9 | 0 | 2  |
| 0  | 0 | 0  | 0 | 0 | 0 | 0 | 0 | 2 | 0 | 2  |
| 0  | 0 | 0  | 0 | 0 | 0 | 0 | 0 | 0 | 0 | 0  |
| 0  | 0 | 0  | 0 | 0 | 0 | 0 | 0 | 1 | 0 | 8  |
| 2  | 0 | 0  | 0 | 0 | 0 | 0 | 0 | 4 | 3 | 0  |
| 1  | 0 | 0  | 0 | 0 | 1 | 0 | 0 | 3 | 2 | 1  |
| 1  | 0 | 0  | 0 | 0 | 0 | 0 | 0 | 2 | 1 | 0  |
| 4  | 0 | 0  | 0 | 1 | 0 | 0 | 0 | 2 | 0 | 10 |
| 1  | 0 | 0  | 0 | 0 | 0 | 0 | 0 | 0 | 0 | 1  |
| 0  | 0 | 0  | 0 | 0 | 0 | 0 | 0 | 1 | 0 | 0  |
| 0  | 0 | 0  | 0 | 0 | 0 | 0 | 0 | 3 | 2 | 0  |
| 2  | 0 | 0  | 0 | 0 | 0 | 0 | 0 | 4 | 4 | 0  |
| 0  | 0 | 0  | 0 | 0 | 0 | 0 | 0 | 1 | 1 | 2  |
| 1  | 0 | 0  | 0 | 0 | 0 | 0 | 0 | 2 | 2 | 0  |
| 4  | 0 | 0  | 0 | 0 | 0 | 0 | 0 | 3 | 0 | 3  |
| 0  | 0 | 0  | 0 | 0 | 0 | 0 | 0 | 2 | 0 | 6  |
| 1  | 0 | 0  | 0 | 0 | 0 | 0 | 0 | 1 | 0 | 5  |
| 0  | 0 | 0  | 0 | 0 | 0 | 0 | 0 | 0 | 1 | 0  |
| 0  | 0 | 0  | 0 | 0 | 0 | 0 | 0 | 1 | 0 | 3  |
| 0  | 0 | 16 | 0 | 0 | 0 | 0 | 0 | 4 | 0 | 0  |
| 2  | 0 | 0  | 0 | 0 | 0 | 0 | 0 | 1 | 0 | 0  |
| 2  | 0 | 0  | 0 | 0 | 0 | 0 | 0 | 2 | 0 | 0  |
| 4  | 0 | 0  | 0 | 0 | 0 | 0 | 0 | 2 | 1 | 8  |
| 1  | 0 | 0  | 0 | 0 | 0 | 0 | 0 | 0 | 0 | 3  |
| 0  | 0 | 0  | 0 | 0 | 0 | 0 | 0 | 2 | 1 | 5  |
| 2  | 0 | 0  | 0 | 0 | 0 | 0 | 0 | 2 | 0 | 2  |
| 2  | 0 | 0  | 0 | 0 | 0 | 1 | 0 | 5 | 2 | 0  |

|   |   |    |   |   |   |   |   |   |   |   |
|---|---|----|---|---|---|---|---|---|---|---|
| 4 | 0 | 0  | 0 | 0 | 0 | 0 | 0 | 2 | 3 | 2 |
| 1 | 0 | 0  | 0 | 0 | 0 | 0 | 0 | 5 | 0 | 0 |
| 9 | 0 | 0  | 0 | 0 | 0 | 0 | 1 | 5 | 0 | 1 |
| 3 | 0 | 0  | 0 | 0 | 0 | 0 | 0 | 3 | 3 | 0 |
| 0 | 0 | 0  | 0 | 0 | 0 | 0 | 0 | 3 | 0 | 0 |
| 0 | 0 | 0  | 0 | 0 | 0 | 0 | 0 | 3 | 0 | 0 |
| 0 | 0 | 0  | 0 | 0 | 0 | 0 | 3 | 4 | 0 | 0 |
| 3 | 0 | 1  | 0 | 0 | 0 | 0 | 2 | 8 | 0 | 0 |
| 0 | 0 | 0  | 0 | 0 | 0 | 0 | 0 | 2 | 1 | 2 |
| 4 | 0 | 0  | 1 | 0 | 0 | 0 | 0 | 2 | 3 | 0 |
| 0 | 0 | 0  | 0 | 0 | 0 | 0 | 0 | 1 | 2 | 2 |
| 0 | 0 | 0  | 0 | 0 | 0 | 0 | 0 | 2 | 1 | 1 |
| 0 | 0 | 0  | 0 | 0 | 0 | 0 | 0 | 0 | 4 | 0 |
| 0 | 0 | 22 | 0 | 0 | 0 | 0 | 0 | 2 | 0 | 0 |
| 1 | 0 | 0  | 0 | 0 | 0 | 0 | 0 | 3 | 0 | 0 |
| 0 | 0 | 10 | 0 | 0 | 0 | 0 | 0 | 0 | 0 | 0 |
| 0 | 0 | 0  | 0 | 0 | 0 | 0 | 0 | 2 | 0 | 0 |
| 0 | 0 | 0  | 0 | 0 | 0 | 0 | 0 | 3 | 0 | 1 |
| 0 | 0 | 0  | 0 | 0 | 0 | 0 | 0 | 0 | 0 | 0 |
| 0 | 0 | 0  | 0 | 0 | 0 | 0 | 0 | 2 | 0 | 0 |
| 4 | 0 | 0  | 0 | 0 | 0 | 0 | 0 | 7 | 0 | 0 |
| 5 | 0 | 0  | 0 | 0 | 0 | 0 | 0 | 6 | 7 | 3 |
| 0 | 0 | 0  | 0 | 0 | 0 | 0 | 0 | 2 | 2 | 0 |
| 5 | 0 | 0  | 0 | 0 | 0 | 0 | 0 | 4 | 2 | 1 |
| 6 | 0 | 0  | 0 | 0 | 0 | 0 | 0 | 3 | 3 | 1 |
| 3 | 0 | 0  | 0 | 0 | 0 | 0 | 0 | 1 | 3 | 0 |
| 1 | 0 | 0  | 0 | 0 | 0 | 0 | 0 | 3 | 1 | 1 |
| 0 | 0 | 0  | 0 | 0 | 0 | 0 | 0 | 3 | 1 | 1 |
| 1 | 0 | 0  | 0 | 0 | 0 | 0 | 0 | 5 | 4 | 0 |



|   |   |   |   |   |   |   |   |    |   |   |
|---|---|---|---|---|---|---|---|----|---|---|
| 0 | 0 | 0 | 0 | 0 | 0 | 0 | 0 | 2  | 1 | 2 |
| 1 | 0 | 4 | 0 | 0 | 0 | 0 | 0 | 4  | 0 | 0 |
| 2 | 0 | 1 | 0 | 0 | 0 | 0 | 0 | 17 | 0 | 0 |
| 0 | 0 | 1 | 0 | 0 | 0 | 0 | 0 | 7  | 0 | 0 |
| 1 | 0 | 1 | 0 | 0 | 0 | 0 | 1 | 18 | 0 | 0 |
| 1 | 0 | 2 | 0 | 0 | 0 | 0 | 0 | 6  | 0 | 1 |
| 1 | 0 | 1 | 0 | 0 | 0 | 0 | 0 | 6  | 0 | 0 |
| 0 | 0 | 4 | 0 | 0 | 0 | 0 | 1 | 7  | 0 | 3 |
| 2 | 0 | 8 | 0 | 0 | 0 | 0 | 0 | 20 | 0 | 2 |
| 3 | 0 | 0 | 0 | 0 | 0 | 0 | 0 | 25 | 0 | 0 |
| 0 | 0 | 0 | 0 | 0 | 0 | 0 | 0 | 13 | 0 | 0 |
| 0 | 0 | 0 | 0 | 0 | 0 | 0 | 0 | 3  | 0 | 0 |
| 1 | 0 | 0 | 0 | 0 | 0 | 0 | 0 | 3  | 1 | 0 |
| 0 | 0 | 0 | 0 | 0 | 0 | 0 | 0 | 4  | 1 | 1 |
| 0 | 0 | 0 | 0 | 0 | 0 | 0 | 0 | 3  | 0 | 0 |
| 3 | 0 | 0 | 0 | 0 | 0 | 0 | 0 | 1  | 1 | 0 |
| 2 | 0 | 0 | 0 | 0 | 0 | 0 | 0 | 7  | 2 | 0 |
| 0 | 0 | 0 | 0 | 0 | 0 | 0 | 0 | 3  | 0 | 0 |
| 3 | 0 | 0 | 0 | 0 | 0 | 0 | 0 | 4  | 1 | 0 |
| 1 | 0 | 0 | 0 | 0 | 0 | 0 | 0 | 4  | 2 | 0 |
| 2 | 0 | 0 | 0 | 0 | 0 | 0 | 1 | 8  | 7 | 2 |
| 1 | 0 | 0 | 0 | 0 | 0 | 0 | 1 | 10 | 7 | 1 |
| 0 | 0 | 0 | 0 | 0 | 0 | 0 | 2 | 3  | 0 | 0 |
| 0 | 0 | 0 | 0 | 0 | 0 | 0 | 0 | 1  | 0 | 0 |
| 2 | 0 | 1 | 0 | 0 | 0 | 0 | 0 | 11 | 0 | 8 |
| 0 | 0 | 0 | 0 | 0 | 0 | 0 | 0 | 5  | 4 | 0 |
| 0 | 0 | 0 | 0 | 0 | 0 | 0 | 1 | 1  | 3 | 0 |
| 1 | 0 | 0 | 0 | 0 | 0 | 0 | 0 | 5  | 0 | 0 |
| 0 | 0 | 0 | 0 | 0 | 0 | 0 | 0 | 2  | 0 | 1 |

|   |   |   |   |   |    |   |   |    |   |    |
|---|---|---|---|---|----|---|---|----|---|----|
| 0 | 0 | 0 | 0 | 0 | 0  | 0 | 0 | 1  | 2 | 0  |
| 0 | 0 | 0 | 0 | 0 | 0  | 0 | 0 | 4  | 0 | 0  |
| 2 | 0 | 0 | 0 | 0 | 0  | 0 | 0 | 9  | 0 | 0  |
| 2 | 0 | 0 | 0 | 0 | 0  | 0 | 0 | 5  | 0 | 4  |
| 2 | 0 | 0 | 0 | 0 | 0  | 0 | 0 | 13 | 0 | 6  |
| 1 | 0 | 0 | 0 | 0 | 0  | 0 | 0 | 17 | 0 | 1  |
| 5 | 0 | 0 | 0 | 0 | 0  | 0 | 0 | 19 | 0 | 12 |
| 1 | 0 | 0 | 0 | 0 | 0  | 0 | 0 | 14 | 0 | 1  |
| 2 | 0 | 0 | 0 | 0 | 0  | 0 | 0 | 14 | 0 | 8  |
| 3 | 0 | 0 | 0 | 0 | 0  | 0 | 0 | 15 | 0 | 3  |
| 0 | 0 | 0 | 0 | 0 | 0  | 0 | 0 | 3  | 1 | 1  |
| 3 | 0 | 0 | 0 | 0 | 0  | 0 | 0 | 11 | 0 | 4  |
| 2 | 0 | 0 | 0 | 0 | 0  | 0 | 0 | 6  | 1 | 5  |
| 3 | 0 | 0 | 0 | 0 | 0  | 0 | 0 | 11 | 0 | 3  |
| 1 | 0 | 0 | 0 | 0 | 0  | 0 | 0 | 3  | 0 | 0  |
| 1 | 0 | 0 | 0 | 0 | 0  | 0 | 0 | 3  | 0 | 0  |
| 1 | 0 | 0 | 0 | 0 | 0  | 0 | 0 | 7  | 0 | 0  |
| 3 | 0 | 1 | 0 | 0 | 0  | 0 | 0 | 8  | 0 | 0  |
| 1 | 0 | 0 | 0 | 0 | 0  | 0 | 0 | 1  | 0 | 0  |
| 0 | 0 | 0 | 0 | 0 | 0  | 0 | 0 | 3  | 0 | 0  |
| 1 | 0 | 0 | 0 | 1 | 0  | 0 | 0 | 0  | 0 | 0  |
| 1 | 0 | 0 | 0 | 0 | 0  | 0 | 0 | 5  | 0 | 0  |
| 0 | 0 | 0 | 0 | 0 | 0  | 0 | 0 | 2  | 0 | 0  |
| 0 | 0 | 0 | 0 | 0 | 0  | 0 | 0 | 2  | 0 | 0  |
| 0 | 0 | 1 | 0 | 0 | 0  | 0 | 1 | 11 | 0 | 2  |
| 1 | 0 | 0 | 0 | 0 | 11 | 0 | 0 | 9  | 0 | 2  |
| 0 | 0 | 0 | 0 | 0 | 0  | 0 | 0 | 19 | 0 | 4  |
| 0 | 0 | 0 | 0 | 0 | 0  | 0 | 0 | 4  | 0 | 0  |
| 1 | 0 | 0 | 0 | 0 | 0  | 0 | 0 | 12 | 0 | 4  |

|   |   |    |   |   |   |   |   |   |    |   |   |
|---|---|----|---|---|---|---|---|---|----|---|---|
| 2 | 0 | 1  | 0 | 0 | 0 | 0 | 0 | 0 | 11 | 0 | 2 |
| 1 | 0 | 0  | 0 | 0 | 0 | 0 | 0 | 0 | 7  | 0 | 0 |
| 0 | 0 | 0  | 0 | 0 | 0 | 0 | 0 | 0 | 9  | 0 | 0 |
| 1 | 0 | 0  | 0 | 0 | 0 | 0 | 0 | 0 | 8  | 0 | 1 |
| 0 | 0 | 1  | 0 | 0 | 0 | 0 | 0 | 0 | 8  | 0 | 0 |
| 0 | 0 | 0  | 0 | 0 | 0 | 0 | 0 | 0 | 8  | 0 | 0 |
| 0 | 0 | 0  | 0 | 0 | 0 | 0 | 0 | 0 | 7  | 0 | 0 |
| 0 | 0 | 0  | 0 | 0 | 0 | 0 | 0 | 0 | 5  | 0 | 1 |
| 0 | 0 | 1  | 0 | 0 | 0 | 0 | 0 | 0 | 8  | 0 | 0 |
| 0 | 0 | 0  | 0 | 0 | 0 | 0 | 0 | 0 | 5  | 0 | 1 |
| 0 | 0 | 0  | 0 | 0 | 0 | 0 | 0 | 0 | 8  | 0 | 0 |
| 0 | 0 | 0  | 0 | 0 | 0 | 0 | 0 | 0 | 2  | 0 | 0 |
| 0 | 0 | 1  | 0 | 0 | 0 | 0 | 0 | 0 | 5  | 0 | 0 |
| 1 | 0 | 0  | 0 | 0 | 0 | 0 | 0 | 0 | 8  | 0 | 0 |
| 0 | 0 | 0  | 0 | 0 | 0 | 0 | 0 | 0 | 12 | 0 | 0 |
| 0 | 0 | 2  | 0 | 0 | 0 | 0 | 0 | 0 | 10 | 0 | 1 |
| 0 | 0 | 1  | 0 | 0 | 0 | 0 | 0 | 0 | 4  | 0 | 0 |
| 0 | 0 | 0  | 0 | 0 | 0 | 0 | 0 | 0 | 13 | 0 | 0 |
| 0 | 0 | 3  | 0 | 0 | 0 | 0 | 0 | 1 | 4  | 0 | 0 |
| 0 | 0 | 3  | 0 | 0 | 0 | 0 | 0 | 0 | 9  | 0 | 0 |
| 0 | 0 | 0  | 0 | 0 | 0 | 0 | 0 | 0 | 15 | 0 | 0 |
| 0 | 0 | 10 | 0 | 0 | 0 | 0 | 0 | 0 | 6  | 0 | 0 |
| 3 | 0 | 7  | 0 | 0 | 0 | 0 | 0 | 0 | 6  | 0 | 0 |
| 3 | 0 | 9  | 0 | 0 | 0 | 0 | 0 | 0 | 6  | 0 | 0 |
| 0 | 0 | 1  | 0 | 0 | 0 | 0 | 0 | 0 | 6  | 0 | 0 |
| 2 | 0 | 4  | 0 | 0 | 0 | 0 | 0 | 0 | 8  | 0 | 0 |
| 0 | 0 | 5  | 0 | 0 | 0 | 0 | 0 | 0 | 2  | 0 | 0 |
| 0 | 0 | 2  | 0 | 0 | 0 | 0 | 0 | 0 | 3  | 0 | 0 |
| 0 | 0 | 0  | 0 | 0 | 0 | 0 | 0 | 0 | 5  | 0 | 0 |

|   |   |   |   |   |   |   |   |    |   |   |
|---|---|---|---|---|---|---|---|----|---|---|
| 0 | 0 | 3 | 0 | 0 | 0 | 0 | 0 | 1  | 0 | 0 |
| 0 | 0 | 0 | 0 | 0 | 0 | 0 | 0 | 2  | 0 | 0 |
| 0 | 0 | 0 | 0 | 0 | 0 | 0 | 0 | 2  | 0 | 0 |
| 0 | 0 | 0 | 0 | 0 | 0 | 0 | 0 | 3  | 0 | 0 |
| 0 | 0 | 0 | 0 | 0 | 0 | 0 | 0 | 1  | 0 | 0 |
| 1 | 0 | 0 | 0 | 0 | 0 | 0 | 0 | 1  | 0 | 0 |
| 0 | 0 | 0 | 0 | 0 | 0 | 0 | 0 | 1  | 0 | 0 |
| 0 | 0 | 0 | 0 | 0 | 0 | 0 | 0 | 1  | 0 | 0 |
| 0 | 0 | 0 | 0 | 0 | 0 | 0 | 0 | 1  | 0 | 0 |
| 0 | 0 | 0 | 0 | 0 | 0 | 0 | 0 | 19 | 0 | 0 |
| 0 | 0 | 0 | 0 | 0 | 0 | 0 | 0 | 4  | 0 | 0 |
| 0 | 0 | 0 | 0 | 0 | 0 | 0 | 0 | 4  | 0 | 0 |
| 0 | 0 | 0 | 0 | 0 | 0 | 0 | 0 | 2  | 0 | 0 |
| 0 | 0 | 1 | 0 | 0 | 5 | 0 | 1 | 2  | 0 | 0 |
| 1 | 0 | 0 | 0 | 0 | 0 | 0 | 0 | 9  | 0 | 0 |
| 0 | 0 | 1 | 0 | 0 | 0 | 0 | 0 | 2  | 0 | 1 |
| 0 | 0 | 1 | 0 | 0 | 0 | 0 | 0 | 5  | 0 | 0 |
| 0 | 0 | 1 | 0 | 0 | 0 | 0 | 0 | 6  | 0 | 0 |
| 0 | 0 | 1 | 0 | 0 | 0 | 0 | 0 | 7  | 0 | 0 |
| 0 | 0 | 2 | 0 | 0 | 0 | 0 | 1 | 4  | 0 | 0 |
| 0 | 0 | 0 | 0 | 0 | 0 | 0 | 0 | 4  | 0 | 1 |
| 0 | 0 | 2 | 0 | 0 | 0 | 0 | 0 | 5  | 0 | 0 |
| 2 | 0 | 0 | 0 | 0 | 0 | 0 | 0 | 5  | 0 | 0 |
| 0 | 0 | 0 | 0 | 0 | 0 | 0 | 0 | 2  | 0 | 1 |
| 0 | 0 | 0 | 0 | 0 | 0 | 0 | 0 | 4  | 0 | 0 |
| 3 | 0 | 0 | 0 | 0 | 0 | 0 | 0 | 4  | 0 | 1 |
| 3 | 0 | 0 | 0 | 0 | 0 | 0 | 0 | 2  | 0 | 1 |
| 0 | 0 | 0 | 0 | 0 | 0 | 0 | 0 | 2  | 0 | 0 |
| 0 | 0 | 0 | 0 | 0 | 0 | 0 | 0 | 5  | 0 | 0 |
| 1 | 0 | 0 | 0 | 0 | 0 | 0 | 0 | 4  | 0 | 0 |

|   |   |   |   |   |   |   |   |    |   |    |
|---|---|---|---|---|---|---|---|----|---|----|
| 0 | 0 | 0 | 0 | 0 | 0 | 0 | 0 | 3  | 0 | 0  |
| 0 | 0 | 0 | 0 | 0 | 0 | 0 | 0 | 4  | 0 | 2  |
| 0 | 0 | 0 | 0 | 0 | 0 | 0 | 0 | 0  | 0 | 0  |
| 1 | 0 | 0 | 0 | 0 | 0 | 0 | 0 | 5  | 1 | 0  |
| 1 | 0 | 0 | 0 | 0 | 0 | 0 | 0 | 1  | 0 | 0  |
| 1 | 0 | 0 | 0 | 0 | 0 | 0 | 0 | 4  | 0 | 2  |
| 0 | 0 | 0 | 0 | 0 | 0 | 0 | 0 | 3  | 0 | 0  |
| 0 | 0 | 0 | 0 | 0 | 0 | 0 | 0 | 5  | 0 | 1  |
| 3 | 0 | 0 | 0 | 0 | 0 | 0 | 0 | 4  | 0 | 1  |
| 1 | 0 | 0 | 0 | 0 | 0 | 0 | 0 | 6  | 0 | 1  |
| 3 | 0 | 0 | 0 | 0 | 0 | 0 | 0 | 7  | 0 | 6  |
| 4 | 0 | 0 | 0 | 0 | 0 | 0 | 0 | 8  | 0 | 0  |
| 3 | 0 | 0 | 0 | 0 | 0 | 0 | 0 | 8  | 0 | 4  |
| 1 | 0 | 0 | 0 | 0 | 0 | 0 | 0 | 5  | 0 | 1  |
| 1 | 0 | 0 | 0 | 0 | 0 | 0 | 0 | 2  | 0 | 2  |
| 2 | 0 | 0 | 0 | 0 | 0 | 0 | 0 | 5  | 0 | 0  |
| 1 | 0 | 0 | 0 | 0 | 0 | 0 | 0 | 4  | 0 | 0  |
| 2 | 0 | 0 | 0 | 0 | 0 | 0 | 0 | 8  | 0 | 7  |
| 1 | 0 | 0 | 0 | 0 | 0 | 0 | 0 | 6  | 1 | 1  |
| 7 | 0 | 0 | 0 | 0 | 0 | 0 | 0 | 7  | 0 | 2  |
| 2 | 0 | 0 | 0 | 0 | 0 | 0 | 0 | 3  | 7 | 0  |
| 1 | 0 | 0 | 0 | 0 | 0 | 0 | 0 | 11 | 0 | 1  |
| 3 | 0 | 0 | 0 | 0 | 0 | 0 | 0 | 3  | 0 | 5  |
| 7 | 0 | 0 | 0 | 0 | 0 | 0 | 0 | 6  | 0 | 13 |
| 5 | 0 | 0 | 0 | 0 | 0 | 0 | 0 | 12 | 0 | 2  |
| 4 | 0 | 0 | 0 | 0 | 0 | 0 | 0 | 11 | 1 | 1  |
| 5 | 0 | 0 | 0 | 0 | 0 | 0 | 0 | 15 | 0 | 1  |
| 0 | 0 | 0 | 0 | 0 | 0 | 0 | 0 | 5  | 2 | 0  |
| 1 | 0 | 0 | 0 | 0 | 0 | 0 | 0 | 8  | 6 | 0  |

|   |   |   |   |   |   |   |   |    |    |    |
|---|---|---|---|---|---|---|---|----|----|----|
| 2 | 0 | 0 | 0 | 0 | 0 | 0 | 0 | 6  | 2  | 0  |
| 4 | 0 | 0 | 0 | 0 | 0 | 0 | 0 | 8  | 3  | 3  |
| 3 | 4 | 0 | 0 | 0 | 0 | 0 | 0 | 4  | 1  | 2  |
| 1 | 0 | 0 | 0 | 0 | 0 | 0 | 0 | 6  | 3  | 6  |
| 0 | 0 | 0 | 0 | 0 | 0 | 0 | 0 | 4  | 2  | 1  |
| 1 | 0 | 0 | 0 | 0 | 0 | 0 | 0 | 6  | 4  | 0  |
| 4 | 0 | 0 | 0 | 0 | 0 | 0 | 0 | 4  | 11 | 0  |
| 3 | 0 | 0 | 0 | 0 | 0 | 0 | 0 | 8  | 5  | 1  |
| 4 | 0 | 0 | 0 | 0 | 0 | 0 | 0 | 9  | 9  | 3  |
| 1 | 0 | 0 | 0 | 0 | 0 | 0 | 0 | 9  | 4  | 2  |
| 1 | 0 | 0 | 0 | 0 | 0 | 0 | 0 | 6  | 3  | 3  |
| 0 | 0 | 0 | 0 | 0 | 0 | 0 | 0 | 2  | 0  | 2  |
| 0 | 0 | 0 | 0 | 0 | 0 | 0 | 0 | 10 | 5  | 0  |
| 7 | 0 | 0 | 0 | 0 | 0 | 0 | 0 | 5  | 16 | 12 |
| 8 | 0 | 0 | 0 | 0 | 0 | 0 | 0 | 4  | 2  | 8  |
| 1 | 0 | 0 | 0 | 0 | 0 | 0 | 0 | 5  | 1  | 0  |
| 1 | 0 | 0 | 0 | 0 | 0 | 0 | 0 | 5  | 1  | 1  |
| 2 | 0 | 0 | 0 | 0 | 0 | 0 | 0 | 4  | 1  | 0  |
| 1 | 0 | 0 | 0 | 0 | 0 | 0 | 0 | 1  | 1  | 4  |
| 1 | 0 | 0 | 0 | 0 | 0 | 0 | 0 | 1  | 0  | 2  |
| 1 | 0 | 0 | 0 | 0 | 0 | 0 | 0 | 4  | 2  | 4  |
| 2 | 0 | 0 | 0 | 0 | 0 | 0 | 0 | 3  | 4  | 1  |
| 0 | 0 | 0 | 0 | 0 | 0 | 0 | 0 | 4  | 4  | 0  |
| 0 | 0 | 0 | 0 | 0 | 0 | 0 | 0 | 1  | 2  | 2  |
| 0 | 0 | 0 | 0 | 0 | 0 | 0 | 0 | 1  | 2  | 0  |
| 3 | 0 | 0 | 0 | 0 | 0 | 0 | 0 | 1  | 0  | 0  |
| 1 | 0 | 0 | 0 | 0 | 0 | 0 | 0 | 6  | 0  | 1  |
| 0 | 0 | 0 | 0 | 0 | 0 | 0 | 0 | 6  | 1  | 0  |
| 6 | 0 | 0 | 0 | 0 | 0 | 0 | 0 | 1  | 0  | 0  |

|    |   |   |   |   |   |   |   |   |   |   |
|----|---|---|---|---|---|---|---|---|---|---|
| 1  | 0 | 0 | 0 | 0 | 0 | 0 | 0 | 1 | 1 | 1 |
| 5  | 0 | 0 | 0 | 0 | 0 | 0 | 0 | 3 | 1 | 1 |
| 4  | 0 | 0 | 0 | 0 | 0 | 0 | 0 | 3 | 0 | 0 |
| 7  | 0 | 0 | 0 | 0 | 0 | 0 | 0 | 4 | 1 | 0 |
| 8  | 0 | 0 | 1 | 0 | 0 | 0 | 0 | 5 | 2 | 0 |
| 1  | 0 | 0 | 0 | 0 | 0 | 0 | 0 | 2 | 1 | 1 |
| 0  | 0 | 0 | 0 | 0 | 0 | 0 | 0 | 0 | 0 | 0 |
| 0  | 0 | 0 | 0 | 0 | 0 | 0 | 0 | 1 | 1 | 0 |
| 0  | 0 | 0 | 0 | 0 | 0 | 0 | 0 | 1 | 0 | 1 |
| 1  | 0 | 0 | 0 | 0 | 0 | 0 | 0 | 2 | 0 | 4 |
| 9  | 0 | 0 | 0 | 0 | 0 | 0 | 0 | 3 | 0 | 2 |
| 3  | 0 | 0 | 0 | 0 | 0 | 0 | 0 | 3 | 0 | 4 |
| 10 | 0 | 0 | 0 | 0 | 0 | 0 | 0 | 2 | 3 | 6 |
| 12 | 1 | 0 | 0 | 0 | 0 | 0 | 0 | 3 | 4 | 1 |
| 12 | 0 | 0 | 0 | 0 | 0 | 0 | 0 | 8 | 6 | 0 |
| 4  | 0 | 0 | 0 | 0 | 0 | 0 | 0 | 3 | 0 | 0 |
| 0  | 0 | 0 | 0 | 0 | 0 | 0 | 0 | 0 | 0 | 3 |
| 0  | 0 | 0 | 0 | 0 | 0 | 0 | 0 | 4 | 1 | 0 |
| 5  | 0 | 0 | 0 | 0 | 0 | 0 | 0 | 1 | 0 | 2 |
| 3  | 0 | 0 | 0 | 0 | 0 | 0 | 0 | 2 | 4 | 2 |
| 5  | 0 | 0 | 0 | 0 | 0 | 0 | 0 | 2 | 3 | 0 |
| 5  | 0 | 0 | 0 | 0 | 0 | 0 | 0 | 3 | 6 | 2 |
| 2  | 0 | 0 | 0 | 0 | 0 | 0 | 0 | 1 | 0 | 2 |
| 4  | 0 | 0 | 0 | 0 | 0 | 1 | 0 | 4 | 6 | 3 |
| 10 | 0 | 0 | 0 | 0 | 0 | 0 | 0 | 5 | 1 | 4 |
| 4  | 0 | 0 | 0 | 0 | 0 | 0 | 0 | 5 | 1 | 4 |
| 5  | 0 | 0 | 0 | 0 | 0 | 0 | 0 | 2 | 2 | 2 |
| 3  | 0 | 0 | 0 | 0 | 0 | 0 | 0 | 5 | 0 | 2 |
| 4  | 0 | 0 | 0 | 0 | 0 | 0 | 0 | 1 | 0 | 1 |

|   |   |   |   |   |   |   |   |   |   |   |
|---|---|---|---|---|---|---|---|---|---|---|
| 3 | 0 | 0 | 0 | 0 | 0 | 0 | 0 | 2 | 0 | 3 |
| 4 | 0 | 0 | 0 | 0 | 0 | 0 | 0 | 2 | 1 | 2 |
| 4 | 0 | 0 | 0 | 0 | 0 | 0 | 0 | 2 | 0 | 7 |
| 0 | 0 | 0 | 0 | 0 | 0 | 0 | 0 | 2 | 0 | 2 |
| 1 | 0 | 0 | 0 | 2 | 0 | 0 | 0 | 0 | 0 | 1 |
| 2 | 0 | 0 | 0 | 0 | 0 | 0 | 0 | 4 | 1 | 0 |
| 1 | 0 | 0 | 0 | 0 | 0 | 0 | 0 | 1 | 1 | 0 |
| 1 | 0 | 0 | 0 | 0 | 0 | 0 | 0 | 0 | 1 | 2 |
| 0 | 0 | 0 | 0 | 0 | 0 | 0 | 0 | 1 | 0 | 0 |
| 2 | 0 | 0 | 0 | 0 | 0 | 0 | 0 | 4 | 4 | 5 |
| 5 | 0 | 0 | 0 | 0 | 0 | 0 | 0 | 4 | 1 | 1 |
| 2 | 0 | 0 | 0 | 0 | 0 | 0 | 0 | 4 | 4 | 7 |
| 0 | 0 | 0 | 0 | 0 | 0 | 0 | 0 | 2 | 2 | 1 |
| 1 | 0 | 0 | 0 | 0 | 0 | 0 | 0 | 0 | 3 | 7 |
| 0 | 0 | 0 | 0 | 0 | 0 | 0 | 0 | 3 | 2 | 0 |
| 0 | 0 | 0 | 0 | 0 | 0 | 0 | 0 | 5 | 1 | 3 |
| 1 | 0 | 0 | 0 | 0 | 0 | 0 | 0 | 3 | 0 | 0 |
| 4 | 0 | 0 | 0 | 0 | 0 | 0 | 1 | 4 | 0 | 0 |
| 0 | 0 | 0 | 0 | 0 | 0 | 0 | 0 | 1 | 0 | 0 |
| 3 | 0 | 0 | 0 | 0 | 0 | 0 | 0 | 8 | 6 | 0 |
| 1 | 0 | 0 | 0 | 0 | 0 | 0 | 0 | 3 | 1 | 4 |
| 1 | 0 | 0 | 0 | 0 | 0 | 0 | 0 | 1 | 3 | 8 |
| 1 | 0 | 0 | 0 | 0 | 0 | 0 | 0 | 1 | 0 | 2 |
| 0 | 0 | 0 | 0 | 0 | 0 | 0 | 0 | 5 | 0 | 1 |
| 3 | 0 | 0 | 0 | 0 | 0 | 0 | 0 | 3 | 4 | 7 |
| 3 | 0 | 0 | 0 | 0 | 0 | 0 | 0 | 3 | 0 | 3 |
| 8 | 0 | 1 | 0 | 0 | 0 | 0 | 0 | 5 | 0 | 1 |
| 2 | 0 | 0 | 0 | 0 | 0 | 0 | 0 | 9 | 0 | 7 |
| 2 | 0 | 0 | 0 | 0 | 0 | 0 | 0 | 2 | 1 | 1 |



|   |   |   |   |   |   |   |   |    |   |   |
|---|---|---|---|---|---|---|---|----|---|---|
| 0 | 0 | 0 | 0 | 0 | 0 | 0 | 0 | 3  | 0 | 2 |
| 1 | 0 | 0 | 0 | 0 | 0 | 0 | 1 | 11 | 0 | 3 |
| 1 | 0 | 0 | 0 | 0 | 0 | 0 | 1 | 10 | 0 | 2 |
| 0 | 0 | 0 | 0 | 0 | 0 | 0 | 0 | 9  | 0 | 0 |
| 1 | 0 | 0 | 0 | 0 | 0 | 0 | 0 | 4  | 0 | 2 |
| 0 | 0 | 0 | 0 | 0 | 0 | 0 | 0 | 10 | 0 | 3 |
| 0 | 0 | 0 | 0 | 0 | 0 | 0 | 0 | 9  | 0 | 0 |
| 1 | 0 | 0 | 0 | 0 | 0 | 0 | 0 | 7  | 0 | 1 |
| 0 | 0 | 0 | 0 | 0 | 0 | 0 | 0 | 8  | 0 | 1 |
| 1 | 0 | 0 | 0 | 0 | 0 | 0 | 0 | 9  | 0 | 2 |
| 2 | 0 | 0 | 0 | 0 | 0 | 0 | 2 | 2  | 0 | 3 |
| 0 | 0 | 0 | 0 | 0 | 0 | 0 | 0 | 2  | 0 | 0 |
| 1 | 0 | 0 | 0 | 0 | 0 | 0 | 4 | 19 | 0 | 0 |
| 0 | 0 | 0 | 0 | 0 | 0 | 0 | 1 | 5  | 0 | 3 |
| 0 | 0 | 0 | 0 | 0 | 0 | 0 | 0 | 9  | 0 | 2 |
| 0 | 0 | 0 | 0 | 0 | 0 | 0 | 0 | 11 | 0 | 1 |
| 0 | 0 | 0 | 0 | 0 | 0 | 0 | 0 | 7  | 0 | 2 |
| 0 | 0 | 0 | 0 | 0 | 0 | 0 | 0 | 6  | 0 | 0 |
| 0 | 0 | 0 | 0 | 0 | 0 | 0 | 0 | 8  | 0 | 0 |
| 0 | 0 | 0 | 0 | 0 | 0 | 0 | 3 | 9  | 0 | 0 |
| 0 | 0 | 0 | 0 | 0 | 0 | 0 | 1 | 13 | 0 | 2 |
| 0 | 0 | 0 | 0 | 0 | 0 | 0 | 1 | 13 | 0 | 1 |
| 0 | 0 | 0 | 0 | 0 | 0 | 0 | 0 | 1  | 0 | 0 |
| 0 | 0 | 0 | 0 | 0 | 0 | 0 | 0 | 3  | 0 | 0 |
| 0 | 0 | 0 | 0 | 0 | 0 | 0 | 1 | 7  | 0 | 0 |
| 0 | 0 | 0 | 0 | 0 | 0 | 0 | 0 | 6  | 0 | 0 |
| 0 | 0 | 1 | 0 | 0 | 0 | 0 | 0 | 9  | 0 | 1 |
| 0 | 0 | 0 | 0 | 0 | 0 | 0 | 0 | 8  | 0 | 0 |
| 1 | 0 | 0 | 0 | 0 | 0 | 0 | 1 | 5  | 0 | 0 |

|   |   |    |   |   |   |   |   |    |   |   |
|---|---|----|---|---|---|---|---|----|---|---|
| 0 | 0 | 0  | 0 | 0 | 0 | 0 | 4 | 7  | 0 | 2 |
| 0 | 0 | 3  | 0 | 0 | 0 | 0 | 2 | 7  | 0 | 0 |
| 0 | 0 | 2  | 0 | 0 | 0 | 0 | 1 | 8  | 0 | 1 |
| 0 | 0 | 2  | 0 | 0 | 0 | 0 | 0 | 8  | 0 | 1 |
| 0 | 0 | 0  | 0 | 0 | 0 | 0 | 0 | 7  | 0 | 0 |
| 0 | 0 | 0  | 0 | 0 | 0 | 0 | 2 | 7  | 0 | 1 |
| 0 | 0 | 2  | 0 | 0 | 0 | 0 | 0 | 13 | 0 | 1 |
| 0 | 0 | 1  | 0 | 0 | 0 | 0 | 0 | 3  | 0 | 1 |
| 0 | 0 | 0  | 0 | 0 | 0 | 0 | 0 | 6  | 0 | 0 |
| 0 | 0 | 0  | 0 | 0 | 0 | 0 | 0 | 5  | 0 | 0 |
| 0 | 0 | 0  | 0 | 0 | 0 | 0 | 0 | 6  | 0 | 0 |
| 0 | 0 | 0  | 0 | 0 | 0 | 0 | 0 | 5  | 0 | 0 |
| 0 | 0 | 0  | 0 | 0 | 0 | 0 | 0 | 4  | 0 | 0 |
| 0 | 0 | 1  | 0 | 0 | 0 | 0 | 0 | 3  | 0 | 0 |
| 0 | 0 | 2  | 0 | 0 | 0 | 0 | 0 | 0  | 0 | 0 |
| 0 | 0 | 44 | 0 | 0 | 0 | 0 | 0 | 5  | 0 | 0 |
| 0 | 0 | 3  | 0 | 0 | 0 | 0 | 0 | 3  | 0 | 0 |
| 0 | 0 | 0  | 0 | 0 | 0 | 0 | 0 | 3  | 0 | 0 |
| 0 | 0 | 1  | 0 | 0 | 0 | 0 | 1 | 1  | 0 | 0 |
| 0 | 0 | 48 | 0 | 0 | 0 | 0 | 0 | 0  | 0 | 0 |
| 0 | 0 | 3  | 0 | 0 | 0 | 0 | 0 | 2  | 0 | 0 |
| 1 | 0 | 13 | 0 | 0 | 0 | 0 | 0 | 2  | 0 | 0 |
| 0 | 0 | 8  | 0 | 0 | 0 | 0 | 0 | 0  | 0 | 0 |

|        |        |        |        |        |        |        |        |        |        |        |   |
|--------|--------|--------|--------|--------|--------|--------|--------|--------|--------|--------|---|
| lumbri | lunsmā | lysian | maclil | macste | magdak | methal | micten | mussen | mysiad | nebali |   |
| 0      | 0      | 0      | 17     | 0      | 2      | 0      | 0      | 0      | 0      | 0      | 0 |
| 0      | 0      | 0      | 10     | 0      | 2      | 0      | 0      | 0      | 0      | 0      | 0 |
| 0      | 0      | 0      | 5      | 0      | 0      | 0      | 0      | 0      | 0      | 0      | 0 |
| 0      | 0      | 0      | 9      | 0      | 1      | 0      | 0      | 0      | 0      | 0      | 0 |

|   |   |   |    |   |    |   |   |   |   |   |
|---|---|---|----|---|----|---|---|---|---|---|
| 0 | 0 | 0 | 16 | 0 | 1  | 1 | 0 | 0 | 0 | 0 |
| 0 | 0 | 0 | 9  | 0 | 6  | 0 | 0 | 0 | 0 | 0 |
| 0 | 0 | 0 | 15 | 0 | 1  | 0 | 0 | 0 | 0 | 0 |
| 0 | 0 | 0 | 18 | 0 | 0  | 0 | 0 | 0 | 0 | 0 |
| 0 | 0 | 0 | 15 | 0 | 1  | 2 | 0 | 0 | 0 | 0 |
| 0 | 0 | 0 | 7  | 0 | 0  | 0 | 0 | 0 | 0 | 0 |
| 0 | 0 | 0 | 3  | 1 | 5  | 0 | 0 | 0 | 0 | 0 |
| 0 | 0 | 0 | 6  | 1 | 6  | 0 | 0 | 0 | 0 | 0 |
| 0 | 0 | 0 | 7  | 4 | 9  | 0 | 0 | 0 | 0 | 0 |
| 0 | 0 | 0 | 5  | 5 | 6  | 0 | 0 | 0 | 0 | 0 |
| 0 | 0 | 0 | 4  | 2 | 13 | 0 | 0 | 0 | 0 | 0 |
| 0 | 0 | 0 | 6  | 2 | 4  | 0 | 0 | 0 | 0 | 0 |
| 0 | 0 | 0 | 12 | 1 | 7  | 0 | 0 | 0 | 0 | 0 |
| 0 | 0 | 0 | 6  | 8 | 7  | 0 | 0 | 0 | 0 | 0 |
| 0 | 0 | 0 | 0  | 4 | 4  | 0 | 0 | 0 | 0 | 0 |
| 0 | 0 | 0 | 5  | 4 | 8  | 0 | 0 | 0 | 0 | 0 |
| 0 | 0 | 0 | 13 | 0 | 0  | 1 | 0 | 0 | 0 | 0 |
| 0 | 0 | 0 | 7  | 1 | 0  | 0 | 0 | 0 | 0 | 0 |
| 0 | 0 | 0 | 6  | 1 | 2  | 0 | 0 | 0 | 0 | 0 |
| 0 | 0 | 0 | 8  | 0 | 1  | 0 | 0 | 0 | 0 | 0 |
| 0 | 0 | 0 | 6  | 1 | 2  | 0 | 0 | 0 | 0 | 0 |
| 0 | 0 | 0 | 11 | 0 | 0  | 0 | 0 | 0 | 0 | 0 |
| 0 | 0 | 0 | 11 | 0 | 1  | 0 | 0 | 0 | 0 | 0 |
| 0 | 0 | 0 | 7  | 0 | 1  | 0 | 0 | 0 | 0 | 0 |
| 0 | 0 | 0 | 8  | 0 | 2  | 0 | 0 | 0 | 0 | 0 |
| 0 | 0 | 0 | 8  | 1 | 6  | 0 | 0 | 0 | 1 | 0 |
| 0 | 0 | 0 | 15 | 0 | 2  | 0 | 0 | 0 | 0 | 0 |
| 0 | 0 | 0 | 6  | 3 | 0  | 0 | 0 | 0 | 0 | 0 |
| 0 | 0 | 0 | 6  | 1 | 4  | 0 | 0 | 0 | 0 | 0 |

|   |   |   |    |   |   |   |   |   |   |   |
|---|---|---|----|---|---|---|---|---|---|---|
| 0 | 0 | 0 | 8  | 0 | 2 | 0 | 0 | 0 | 0 | 0 |
| 0 | 0 | 0 | 6  | 1 | 0 | 0 | 0 | 0 | 0 | 0 |
| 0 | 0 | 0 | 14 | 0 | 2 | 0 | 0 | 0 | 0 | 0 |
| 0 | 0 | 0 | 9  | 0 | 0 | 0 | 0 | 0 | 0 | 0 |
| 0 | 0 | 0 | 12 | 0 | 1 | 0 | 0 | 0 | 0 | 0 |
| 0 | 0 | 0 | 4  | 2 | 3 | 0 | 0 | 1 | 0 | 0 |
| 0 | 0 | 0 | 7  | 0 | 0 | 0 | 0 | 0 | 0 | 0 |
| 0 | 1 | 0 | 10 | 1 | 2 | 0 | 0 | 0 | 0 | 0 |
| 0 | 0 | 0 | 4  | 1 | 0 | 0 | 0 | 0 | 0 | 0 |
| 0 | 0 | 0 | 4  | 1 | 1 | 0 | 0 | 0 | 0 | 0 |
| 0 | 0 | 0 | 2  | 0 | 0 | 0 | 0 | 0 | 0 | 0 |
| 0 | 0 | 0 | 6  | 0 | 2 | 0 | 0 | 0 | 0 | 0 |
| 0 | 0 | 0 | 4  | 0 | 1 | 0 | 0 | 0 | 0 | 0 |
| 0 | 0 | 0 | 10 | 0 | 3 | 0 | 0 | 0 | 0 | 0 |
| 0 | 0 | 0 | 3  | 0 | 2 | 0 | 0 | 0 | 0 | 0 |
| 0 | 0 | 0 | 4  | 0 | 2 | 0 | 0 | 0 | 0 | 0 |
| 0 | 0 | 0 | 9  | 1 | 0 | 0 | 0 | 0 | 0 | 0 |
| 0 | 0 | 0 | 5  | 2 | 1 | 0 | 0 | 0 | 0 | 0 |
| 0 | 0 | 0 | 8  | 0 | 0 | 0 | 0 | 0 | 0 | 1 |
| 0 | 0 | 0 | 5  | 0 | 2 | 0 | 0 | 0 | 0 | 0 |
| 0 | 0 | 0 | 7  | 0 | 1 | 0 | 0 | 0 | 0 | 0 |
| 0 | 0 | 0 | 6  | 0 | 2 | 0 | 0 | 0 | 0 | 0 |
| 0 | 0 | 0 | 8  | 0 | 0 | 0 | 0 | 0 | 0 | 0 |
| 0 | 0 | 0 | 6  | 0 | 1 | 0 | 0 | 0 | 0 | 0 |
| 0 | 0 | 0 | 6  | 0 | 1 | 0 | 0 | 0 | 0 | 0 |
| 0 | 0 | 0 | 5  | 0 | 0 | 0 | 0 | 0 | 0 | 0 |
| 0 | 0 | 0 | 3  | 0 | 0 | 0 | 0 | 0 | 0 | 0 |
| 0 | 0 | 0 | 1  | 0 | 1 | 0 | 0 | 0 | 0 | 0 |
| 0 | 0 | 0 | 12 | 0 | 3 | 0 | 0 | 0 | 1 | 0 |

|   |   |   |    |   |    |   |   |   |   |   |
|---|---|---|----|---|----|---|---|---|---|---|
| 0 | 0 | 0 | 5  | 0 | 0  | 0 | 0 | 0 | 0 | 0 |
| 0 | 0 | 0 | 1  | 0 | 0  | 0 | 0 | 0 | 0 | 0 |
| 0 | 0 | 0 | 0  | 0 | 0  | 0 | 0 | 0 | 0 | 0 |
| 0 | 0 | 0 | 2  | 0 | 1  | 0 | 0 | 0 | 0 | 0 |
| 0 | 0 | 0 | 0  | 0 | 0  | 0 | 0 | 0 | 0 | 0 |
| 0 | 0 | 0 | 1  | 0 | 0  | 0 | 0 | 0 | 1 | 0 |
| 0 | 0 | 0 | 7  | 0 | 0  | 0 | 0 | 0 | 1 | 0 |
| 0 | 0 | 0 | 8  | 0 | 0  | 0 | 0 | 0 | 0 | 0 |
| 0 | 0 | 0 | 0  | 0 | 0  | 0 | 0 | 0 | 0 | 0 |
| 0 | 0 | 0 | 9  | 4 | 4  | 0 | 0 | 0 | 0 | 0 |
| 0 | 0 | 0 | 3  | 0 | 0  | 0 | 0 | 0 | 0 | 0 |
| 0 | 0 | 0 | 1  | 1 | 2  | 0 | 0 | 0 | 0 | 0 |
| 0 | 0 | 0 | 8  | 0 | 1  | 0 | 0 | 0 | 0 | 0 |
| 0 | 0 | 0 | 6  | 0 | 0  | 0 | 0 | 0 | 0 | 0 |
| 0 | 0 | 0 | 3  | 0 | 0  | 0 | 0 | 0 | 0 | 0 |
| 0 | 0 | 0 | 6  | 1 | 5  | 0 | 0 | 0 | 0 | 0 |
| 0 | 0 | 0 | 7  | 1 | 4  | 0 | 0 | 0 | 0 | 0 |
| 0 | 0 | 0 | 3  | 1 | 2  | 0 | 0 | 0 | 0 | 0 |
| 0 | 0 | 0 | 10 | 0 | 0  | 0 | 0 | 0 | 0 | 0 |
| 0 | 0 | 0 | 3  | 5 | 5  | 0 | 0 | 0 | 0 | 0 |
| 0 | 0 | 0 | 4  | 0 | 1  | 0 | 0 | 0 | 0 | 0 |
| 0 | 0 | 0 | 4  | 0 | 10 | 0 | 0 | 0 | 0 | 0 |
| 0 | 0 | 0 | 2  | 0 | 6  | 0 | 0 | 0 | 0 | 0 |
| 0 | 0 | 0 | 4  | 5 | 3  | 0 | 0 | 0 | 0 | 0 |
| 0 | 0 | 0 | 6  | 3 | 4  | 0 | 0 | 0 | 0 | 0 |
| 0 | 0 | 0 | 5  | 1 | 5  | 0 | 0 | 0 | 0 | 0 |
| 0 | 0 | 0 | 2  | 2 | 6  | 0 | 0 | 0 | 0 | 0 |
| 0 | 0 | 0 | 4  | 4 | 2  | 0 | 0 | 0 | 0 | 0 |
| 0 | 0 | 0 | 2  | 5 | 5  | 0 | 0 | 0 | 0 | 0 |

|   |   |   |   |   |    |   |   |   |   |   |
|---|---|---|---|---|----|---|---|---|---|---|
| 1 | 0 | 0 | 2 | 2 | 13 | 0 | 0 | 0 | 0 | 0 |
| 0 | 0 | 0 | 5 | 2 | 9  | 0 | 0 | 0 | 0 | 0 |
| 0 | 0 | 0 | 3 | 5 | 3  | 0 | 0 | 0 | 0 | 0 |
| 0 | 0 | 0 | 5 | 5 | 4  | 0 | 0 | 0 | 0 | 0 |
| 0 | 0 | 0 | 6 | 1 | 7  | 0 | 0 | 0 | 0 | 0 |
| 0 | 0 | 0 | 1 | 1 | 6  | 0 | 0 | 0 | 0 | 0 |
| 0 | 0 | 0 | 7 | 0 | 8  | 0 | 0 | 0 | 0 | 0 |
| 0 | 0 | 0 | 2 | 0 | 3  | 0 | 0 | 0 | 0 | 0 |
| 0 | 0 | 0 | 3 | 1 | 5  | 0 | 0 | 0 | 0 | 0 |
| 0 | 0 | 0 | 1 | 5 | 3  | 0 | 0 | 0 | 0 | 0 |
| 0 | 0 | 0 | 2 | 5 | 8  | 0 | 0 | 0 | 0 | 0 |
| 0 | 0 | 0 | 3 | 3 | 1  | 0 | 0 | 0 | 0 | 0 |
| 0 | 0 | 0 | 2 | 2 | 6  | 0 | 0 | 0 | 0 | 0 |
| 0 | 0 | 0 | 4 | 5 | 7  | 0 | 0 | 0 | 0 | 0 |
| 1 | 0 | 0 | 4 | 1 | 4  | 0 | 0 | 0 | 0 | 0 |
| 0 | 0 | 0 | 6 | 3 | 5  | 0 | 0 | 0 | 1 | 0 |
| 0 | 0 | 0 | 3 | 4 | 7  | 0 | 0 | 0 | 0 | 0 |
| 0 | 0 | 0 | 7 | 4 | 4  | 0 | 0 | 0 | 0 | 0 |
| 0 | 0 | 0 | 9 | 6 | 7  | 0 | 0 | 0 | 0 | 0 |
| 0 | 0 | 0 | 3 | 6 | 0  | 0 | 0 | 0 | 0 | 0 |
| 0 | 0 | 0 | 6 | 9 | 0  | 0 | 0 | 0 | 0 | 0 |
| 0 | 0 | 0 | 5 | 2 | 0  | 0 | 0 | 0 | 0 | 0 |
| 0 | 0 | 0 | 5 | 3 | 0  | 0 | 0 | 0 | 0 | 0 |
| 0 | 0 | 0 | 9 | 8 | 0  | 0 | 0 | 0 | 0 | 1 |
| 0 | 0 | 0 | 6 | 5 | 0  | 0 | 0 | 0 | 0 | 0 |
| 0 | 0 | 0 | 6 | 5 | 0  | 0 | 0 | 0 | 0 | 0 |
| 0 | 0 | 0 | 6 | 4 | 0  | 0 | 0 | 0 | 0 | 0 |
| 0 | 0 | 0 | 2 | 2 | 0  | 0 | 0 | 0 | 0 | 0 |
| 0 | 0 | 0 | 4 | 3 | 0  | 0 | 0 | 0 | 0 | 0 |

|   |   |   |   |    |   |   |   |   |   |   |
|---|---|---|---|----|---|---|---|---|---|---|
| 0 | 0 | 0 | 4 | 4  | 9 | 0 | 0 | 0 | 0 | 0 |
| 0 | 0 | 0 | 4 | 6  | 5 | 0 | 0 | 0 | 0 | 0 |
| 0 | 0 | 0 | 4 | 7  | 4 | 0 | 0 | 0 | 0 | 0 |
| 0 | 0 | 0 | 5 | 12 | 8 | 0 | 0 | 0 | 1 | 0 |
| 0 | 0 | 0 | 2 | 3  | 9 | 0 | 0 | 0 | 0 | 0 |
| 0 | 0 | 0 | 2 | 6  | 8 | 0 | 0 | 0 | 0 | 0 |
| 0 | 0 | 0 | 7 | 7  | 4 | 0 | 0 | 0 | 0 | 0 |
| 0 | 0 | 0 | 6 | 2  | 7 | 0 | 0 | 0 | 0 | 0 |
| 0 | 0 | 0 | 6 | 3  | 2 | 0 | 0 | 0 | 0 | 0 |
| 0 | 0 | 0 | 6 | 4  | 3 | 0 | 0 | 0 | 0 | 0 |
| 0 | 0 | 0 | 5 | 4  | 5 | 0 | 0 | 0 | 0 | 0 |
| 0 | 0 | 0 | 3 | 4  | 3 | 0 | 0 | 0 | 0 | 0 |
| 0 | 0 | 0 | 6 | 4  | 3 | 0 | 0 | 0 | 0 | 0 |
| 0 | 0 | 0 | 4 | 6  | 2 | 0 | 0 | 0 | 0 | 0 |
| 0 | 0 | 0 | 4 | 12 | 3 | 0 | 0 | 0 | 0 | 0 |
| 0 | 0 | 0 | 4 | 1  | 4 | 0 | 0 | 0 | 0 | 0 |
| 0 | 0 | 0 | 3 | 0  | 4 | 0 | 0 | 0 | 0 | 0 |
| 0 | 0 | 0 | 3 | 3  | 2 | 0 | 0 | 0 | 0 | 0 |
| 0 | 0 | 0 | 5 | 0  | 6 | 0 | 0 | 0 | 0 | 0 |
| 0 | 0 | 0 | 5 | 0  | 2 | 0 | 0 | 0 | 0 | 0 |
| 0 | 0 | 0 | 5 | 1  | 2 | 0 | 0 | 0 | 0 | 0 |
| 0 | 0 | 0 | 5 | 0  | 1 | 0 | 0 | 0 | 0 | 0 |
| 0 | 0 | 0 | 4 | 4  | 6 | 0 | 0 | 0 | 0 | 0 |
| 0 | 0 | 0 | 6 | 3  | 5 | 0 | 0 | 0 | 0 | 0 |
| 0 | 0 | 0 | 6 | 3  | 5 | 0 | 0 | 0 | 0 | 0 |
| 0 | 0 | 0 | 1 | 2  | 5 | 0 | 0 | 0 | 0 | 0 |
| 0 | 0 | 0 | 0 | 0  | 1 | 0 | 0 | 0 | 0 | 0 |
| 0 | 0 | 0 | 3 | 2  | 5 | 0 | 0 | 0 | 0 | 0 |
| 0 | 0 | 0 | 3 | 1  | 2 | 0 | 0 | 0 | 0 | 0 |

|   |   |   |    |   |   |   |   |   |   |   |
|---|---|---|----|---|---|---|---|---|---|---|
| 0 | 0 | 0 | 3  | 0 | 5 | 0 | 0 | 0 | 0 | 0 |
| 0 | 0 | 0 | 2  | 0 | 6 | 0 | 0 | 0 | 0 | 0 |
| 0 | 0 | 0 | 7  | 2 | 1 | 0 | 0 | 0 | 0 | 0 |
| 0 | 0 | 0 | 5  | 0 | 0 | 0 | 0 | 0 | 0 | 0 |
| 0 | 0 | 0 | 2  | 1 | 5 | 0 | 0 | 0 | 0 | 0 |
| 0 | 0 | 0 | 3  | 2 | 3 | 0 | 0 | 0 | 0 | 0 |
| 0 | 0 | 0 | 7  | 0 | 7 | 0 | 0 | 0 | 0 | 0 |
| 0 | 0 | 0 | 8  | 0 | 5 | 0 | 0 | 0 | 0 | 0 |
| 0 | 0 | 0 | 8  | 0 | 2 | 0 | 0 | 0 | 0 | 0 |
| 0 | 0 | 0 | 7  | 1 | 2 | 0 | 0 | 0 | 0 | 0 |
| 0 | 0 | 0 | 7  | 0 | 6 | 0 | 0 | 0 | 0 | 0 |
| 0 | 0 | 0 | 9  | 0 | 5 | 0 | 0 | 0 | 0 | 0 |
| 0 | 0 | 0 | 3  | 2 | 1 | 0 | 0 | 0 | 0 | 0 |
| 0 | 0 | 0 | 4  | 0 | 2 | 0 | 0 | 0 | 0 | 0 |
| 0 | 0 | 0 | 5  | 0 | 1 | 0 | 1 | 0 | 0 | 0 |
| 0 | 0 | 0 | 11 | 0 | 1 | 0 | 1 | 0 | 0 | 0 |
| 0 | 0 | 0 | 3  | 2 | 0 | 0 | 1 | 0 | 0 | 0 |
| 0 | 0 | 0 | 1  | 0 | 0 | 0 | 0 | 0 | 0 | 0 |
| 0 | 0 | 0 | 4  | 0 | 4 | 0 | 0 | 0 | 0 | 0 |
| 0 | 0 | 0 | 3  | 0 | 0 | 0 | 0 | 0 | 0 | 0 |
| 0 | 0 | 0 | 7  | 0 | 1 | 0 | 0 | 0 | 0 | 0 |
| 0 | 0 | 0 | 6  | 1 | 0 | 0 | 0 | 0 | 0 | 0 |
| 0 | 0 | 0 | 0  | 2 | 0 | 0 | 0 | 0 | 0 | 0 |
| 0 | 0 | 0 | 6  | 0 | 0 | 0 | 0 | 0 | 0 | 0 |
| 0 | 0 | 0 | 4  | 1 | 0 | 0 | 0 | 0 | 0 | 0 |
| 0 | 0 | 0 | 4  | 0 | 1 | 0 | 0 | 0 | 0 | 0 |
| 0 | 0 | 0 | 3  | 0 | 0 | 0 | 1 | 0 | 0 | 0 |
| 0 | 0 | 2 | 5  | 0 | 0 | 0 | 0 | 0 | 0 | 0 |
| 0 | 0 | 0 | 7  | 0 | 0 | 0 | 0 | 0 | 0 | 0 |



|   |   |   |    |   |   |   |   |   |   |   |
|---|---|---|----|---|---|---|---|---|---|---|
| 0 | 0 | 0 | 0  | 1 | 0 | 0 | 0 | 0 | 0 | 0 |
| 0 | 0 | 0 | 0  | 0 | 0 | 0 | 0 | 0 | 0 | 0 |
| 0 | 0 | 0 | 0  | 0 | 0 | 0 | 0 | 0 | 0 | 0 |
| 0 | 0 | 0 | 11 | 0 | 0 | 0 | 0 | 0 | 0 | 0 |
| 0 | 0 | 0 | 0  | 0 | 0 | 0 | 0 | 0 | 0 | 0 |
| 0 | 0 | 0 | 1  | 0 | 0 | 0 | 0 | 0 | 0 | 0 |
| 0 | 0 | 0 | 2  | 0 | 0 | 0 | 0 | 0 | 0 | 0 |
| 0 | 0 | 0 | 7  | 0 | 0 | 0 | 0 | 0 | 0 | 0 |
| 0 | 0 | 0 | 3  | 0 | 1 | 0 | 0 | 0 | 0 | 0 |
| 0 | 0 | 0 | 1  | 0 | 0 | 0 | 0 | 0 | 0 | 0 |
| 0 | 0 | 0 | 4  | 0 | 1 | 0 | 0 | 0 | 0 | 0 |
| 0 | 0 | 0 | 10 | 0 | 0 | 0 | 0 | 0 | 0 | 0 |
| 0 | 0 | 0 | 11 | 0 | 1 | 0 | 0 | 0 | 0 | 0 |
| 0 | 0 | 0 | 18 | 0 | 1 | 0 | 0 | 0 | 0 | 0 |
| 0 | 0 | 0 | 7  | 0 | 0 | 0 | 0 | 0 | 0 | 0 |
| 0 | 0 | 0 | 10 | 0 | 0 | 0 | 0 | 0 | 0 | 0 |
| 0 | 0 | 0 | 10 | 0 | 1 | 0 | 0 | 0 | 0 | 0 |
| 0 | 0 | 0 | 5  | 0 | 1 | 0 | 0 | 0 | 0 | 0 |
| 0 | 0 | 0 | 6  | 0 | 0 | 0 | 0 | 0 | 0 | 0 |
| 0 | 0 | 0 | 5  | 0 | 1 | 0 | 0 | 0 | 0 | 0 |
| 0 | 0 | 0 | 7  | 0 | 0 | 0 | 0 | 0 | 0 | 0 |
| 0 | 0 | 0 | 10 | 0 | 2 | 0 | 0 | 0 | 0 | 0 |
| 0 | 0 | 0 | 3  | 0 | 0 | 0 | 0 | 0 | 0 | 0 |
| 0 | 0 | 0 | 10 | 0 | 0 | 0 | 0 | 0 | 0 | 0 |
| 0 | 0 | 0 | 10 | 1 | 0 | 0 | 0 | 0 | 0 | 0 |
| 0 | 0 | 0 | 6  | 0 | 0 | 0 | 0 | 0 | 0 | 0 |
| 0 | 0 | 0 | 10 | 0 | 1 | 0 | 0 | 0 | 0 | 0 |
| 0 | 0 | 0 | 3  | 0 | 0 | 0 | 0 | 0 | 0 | 0 |
| 0 | 0 | 0 | 6  | 0 | 0 | 0 | 0 | 0 | 0 | 0 |

|   |   |   |    |   |   |   |   |   |   |   |
|---|---|---|----|---|---|---|---|---|---|---|
| 0 | 0 | 0 | 5  | 0 | 1 | 0 | 0 | 0 | 0 | 0 |
| 0 | 0 | 0 | 6  | 0 | 1 | 0 | 0 | 0 | 0 | 0 |
| 0 | 0 | 0 | 9  | 0 | 2 | 0 | 0 | 0 | 0 | 0 |
| 0 | 0 | 0 | 7  | 1 | 0 | 0 | 0 | 0 | 0 | 0 |
| 0 | 0 | 0 | 7  | 0 | 0 | 0 | 0 | 0 | 0 | 0 |
| 0 | 0 | 0 | 13 | 0 | 0 | 0 | 0 | 0 | 0 | 0 |
| 0 | 0 | 0 | 10 | 0 | 0 | 0 | 0 | 0 | 0 | 0 |
| 0 | 0 | 0 | 7  | 0 | 1 | 0 | 0 | 0 | 0 | 0 |
| 0 | 0 | 0 | 13 | 0 | 0 | 0 | 0 | 0 | 0 | 0 |
| 0 | 0 | 0 | 4  | 0 | 0 | 0 | 0 | 0 | 0 | 0 |
| 0 | 0 | 0 | 9  | 0 | 1 | 0 | 0 | 0 | 0 | 2 |
| 0 | 0 | 0 | 11 | 0 | 1 | 0 | 1 | 0 | 0 | 0 |
| 0 | 0 | 0 | 9  | 0 | 0 | 0 | 1 | 0 | 0 | 0 |
| 0 | 0 | 0 | 14 | 0 | 0 | 0 | 0 | 0 | 0 | 0 |
| 0 | 0 | 0 | 1  | 3 | 0 | 0 | 0 | 0 | 0 | 0 |
| 0 | 0 | 0 | 8  | 0 | 1 | 0 | 0 | 0 | 0 | 0 |
| 0 | 0 | 0 | 6  | 0 | 0 | 0 | 0 | 0 | 0 | 0 |
| 0 | 0 | 0 | 7  | 0 | 1 | 0 | 0 | 0 | 0 | 0 |
| 0 | 0 | 0 | 5  | 0 | 2 | 0 | 0 | 0 | 0 | 0 |
| 0 | 0 | 0 | 5  | 0 | 0 | 0 | 0 | 0 | 0 | 0 |
| 0 | 0 | 0 | 2  | 1 | 0 | 0 | 1 | 0 | 0 | 0 |
| 0 | 0 | 0 | 4  | 0 | 0 | 0 | 0 | 0 | 0 | 0 |
| 0 | 0 | 0 | 6  | 0 | 0 | 0 | 1 | 0 | 0 | 0 |
| 0 | 0 | 0 | 1  | 0 | 0 | 0 | 0 | 1 | 0 | 0 |
| 0 | 0 | 0 | 1  | 0 | 3 | 0 | 0 | 0 | 0 | 0 |
| 0 | 0 | 0 | 2  | 1 | 0 | 0 | 0 | 0 | 0 | 0 |
| 0 | 0 | 0 | 4  | 1 | 1 | 0 | 0 | 0 | 0 | 0 |
| 0 | 0 | 0 | 3  | 0 | 3 | 0 | 0 | 0 | 0 | 0 |
| 0 | 0 | 0 | 3  | 4 | 2 | 0 | 0 | 0 | 0 | 0 |

|   |   |   |   |   |   |   |   |   |   |   |
|---|---|---|---|---|---|---|---|---|---|---|
| 0 | 0 | 0 | 3 | 2 | 1 | 0 | 1 | 0 | 0 | 0 |
| 0 | 0 | 0 | 4 | 0 | 0 | 0 | 0 | 0 | 0 | 0 |
| 0 | 0 | 0 | 4 | 2 | 2 | 0 | 0 | 0 | 0 | 0 |
| 0 | 0 | 0 | 1 | 1 | 2 | 0 | 0 | 0 | 0 | 0 |
| 0 | 0 | 0 | 5 | 0 | 1 | 0 | 0 | 0 | 0 | 0 |
| 0 | 0 | 0 | 1 | 1 | 0 | 0 | 0 | 0 | 0 | 0 |
| 0 | 0 | 0 | 4 | 1 | 4 | 0 | 0 | 0 | 0 | 0 |
| 0 | 0 | 0 | 5 | 1 | 2 | 0 | 0 | 0 | 0 | 0 |
| 0 | 0 | 0 | 4 | 0 | 1 | 0 | 0 | 0 | 0 | 0 |
| 0 | 0 | 0 | 1 | 0 | 3 | 0 | 0 | 0 | 0 | 0 |
| 0 | 0 | 0 | 6 | 1 | 2 | 0 | 0 | 0 | 0 | 0 |
| 0 | 0 | 0 | 3 | 2 | 0 | 0 | 0 | 0 | 0 | 0 |
| 0 | 0 | 0 | 3 | 1 | 2 | 0 | 0 | 0 | 0 | 0 |
| 0 | 0 | 0 | 1 | 0 | 1 | 0 | 0 | 0 | 0 | 0 |
| 0 | 0 | 0 | 3 | 2 | 6 | 0 | 0 | 0 | 0 | 0 |
| 0 | 0 | 0 | 2 | 0 | 2 | 0 | 0 | 0 | 0 | 0 |
| 0 | 0 | 0 | 5 | 3 | 3 | 0 | 0 | 0 | 0 | 0 |
| 0 | 0 | 0 | 5 | 1 | 1 | 0 | 0 | 0 | 0 | 0 |
| 0 | 0 | 0 | 3 | 0 | 3 | 0 | 0 | 0 | 0 | 0 |
| 0 | 0 | 0 | 1 | 0 | 3 | 0 | 0 | 0 | 0 | 0 |
| 0 | 0 | 0 | 2 | 2 | 2 | 0 | 0 | 0 | 0 | 0 |
| 0 | 0 | 0 | 1 | 4 | 2 | 0 | 0 | 0 | 0 | 0 |
| 0 | 0 | 0 | 4 | 1 | 1 | 0 | 0 | 0 | 0 | 0 |
| 0 | 0 | 0 | 7 | 0 | 7 | 0 | 0 | 0 | 0 | 0 |
| 0 | 0 | 0 | 2 | 0 | 5 | 0 | 0 | 0 | 0 | 0 |
| 0 | 0 | 0 | 4 | 2 | 3 | 0 | 0 | 0 | 0 | 0 |
| 0 | 0 | 0 | 2 | 0 | 4 | 0 | 0 | 0 | 0 | 0 |
| 0 | 0 | 0 | 4 | 0 | 2 | 0 | 0 | 0 | 0 | 0 |
| 0 | 0 | 0 | 3 | 0 | 5 | 0 | 0 | 0 | 0 | 0 |

|   |   |   |   |    |    |   |   |   |   |   |
|---|---|---|---|----|----|---|---|---|---|---|
| 0 | 0 | 0 | 0 | 0  | 2  | 0 | 0 | 0 | 0 | 0 |
| 0 | 0 | 0 | 6 | 4  | 6  | 0 | 0 | 0 | 0 | 0 |
| 0 | 0 | 0 | 6 | 0  | 7  | 0 | 0 | 0 | 0 | 0 |
| 0 | 0 | 0 | 3 | 3  | 6  | 0 | 0 | 0 | 0 | 0 |
| 0 | 0 | 0 | 4 | 0  | 4  | 0 | 0 | 0 | 0 | 0 |
| 0 | 0 | 0 | 4 | 5  | 5  | 0 | 0 | 0 | 0 | 0 |
| 0 | 0 | 0 | 3 | 13 | 10 | 0 | 0 | 0 | 0 | 0 |
| 0 | 0 | 0 | 5 | 1  | 8  | 0 | 0 | 0 | 0 | 0 |
| 0 | 0 | 0 | 3 | 4  | 4  | 0 | 0 | 0 | 0 | 0 |
| 0 | 0 | 0 | 9 | 9  | 5  | 0 | 0 | 0 | 0 | 0 |
| 0 | 0 | 0 | 7 | 1  | 3  | 0 | 0 | 0 | 0 | 0 |
| 0 | 0 | 0 | 5 | 6  | 2  | 0 | 0 | 0 | 0 | 0 |
| 0 | 0 | 0 | 2 | 14 | 8  | 0 | 0 | 0 | 0 | 0 |
| 0 | 0 | 0 | 5 | 8  | 1  | 0 | 0 | 0 | 0 | 0 |
| 0 | 0 | 0 | 5 | 9  | 6  | 0 | 0 | 0 | 0 | 0 |
| 0 | 0 | 0 | 4 | 7  | 7  | 0 | 0 | 0 | 0 | 0 |
| 0 | 0 | 0 | 2 | 7  | 5  | 0 | 0 | 0 | 0 | 0 |
| 0 | 0 | 0 | 2 | 10 | 4  | 0 | 0 | 0 | 0 | 0 |
| 0 | 0 | 0 | 3 | 6  | 1  | 0 | 0 | 0 | 0 | 0 |
| 0 | 0 | 0 | 5 | 7  | 8  | 0 | 0 | 0 | 0 | 0 |
| 0 | 0 | 0 | 5 | 14 | 6  | 0 | 0 | 0 | 0 | 0 |
| 0 | 0 | 0 | 1 | 0  | 1  | 0 | 0 | 0 | 0 | 0 |
| 0 | 0 | 0 | 2 | 11 | 15 | 0 | 0 | 0 | 0 | 0 |
| 0 | 0 | 0 | 2 | 5  | 8  | 0 | 0 | 0 | 0 | 0 |
| 0 | 0 | 0 | 3 | 5  | 7  | 0 | 0 | 0 | 0 | 0 |
| 0 | 0 | 0 | 2 | 6  | 0  | 0 | 0 | 0 | 0 | 0 |
| 0 | 0 | 0 | 2 | 5  | 7  | 0 | 0 | 0 | 0 | 0 |
| 0 | 0 | 0 | 6 | 9  | 5  | 0 | 0 | 0 | 0 | 0 |
| 0 | 0 | 0 | 2 | 10 | 5  | 0 | 0 | 0 | 0 | 0 |

|   |   |   |    |    |    |   |   |   |   |   |
|---|---|---|----|----|----|---|---|---|---|---|
| 0 | 0 | 0 | 4  | 5  | 4  | 0 | 0 | 0 | 0 | 0 |
| 0 | 0 | 0 | 2  | 9  | 5  | 0 | 0 | 0 | 0 | 0 |
| 0 | 0 | 0 | 4  | 7  | 9  | 0 | 0 | 0 | 0 | 0 |
| 0 | 0 | 0 | 1  | 7  | 12 | 0 | 0 | 0 | 0 | 0 |
| 1 | 0 | 0 | 12 | 1  | 4  | 0 | 0 | 0 | 0 | 0 |
| 0 | 0 | 0 | 2  | 10 | 17 | 0 | 0 | 0 | 0 | 0 |
| 0 | 0 | 0 | 0  | 1  | 0  | 0 | 0 | 0 | 0 | 0 |
| 0 | 0 | 0 | 4  | 4  | 4  | 0 | 0 | 0 | 0 | 0 |
| 0 | 0 | 0 | 1  | 0  | 0  | 0 | 0 | 0 | 0 | 0 |
| 0 | 0 | 0 | 1  | 5  | 2  | 0 | 0 | 0 | 0 | 0 |
| 0 | 0 | 0 | 3  | 7  | 3  | 0 | 4 | 0 | 0 | 0 |
| 0 | 0 | 0 | 8  | 5  | 8  | 0 | 0 | 0 | 0 | 0 |
| 0 | 0 | 0 | 1  | 6  | 4  | 0 | 0 | 0 | 0 | 0 |
| 0 | 0 | 0 | 2  | 6  | 3  | 0 | 0 | 0 | 0 | 0 |
| 0 | 0 | 0 | 2  | 1  | 6  | 0 | 0 | 0 | 0 | 0 |
| 0 | 0 | 0 | 5  | 9  | 2  | 0 | 0 | 0 | 0 | 0 |
| 0 | 0 | 0 | 4  | 4  | 5  | 0 | 0 | 0 | 0 | 0 |
| 0 | 0 | 0 | 4  | 7  | 5  | 0 | 0 | 0 | 0 | 1 |
| 0 | 0 | 0 | 3  | 9  | 4  | 0 | 0 | 0 | 0 | 0 |
| 0 | 0 | 0 | 8  | 5  | 16 | 0 | 0 | 0 | 0 | 0 |
| 0 | 0 | 0 | 2  | 6  | 3  | 0 | 0 | 0 | 0 | 0 |
| 0 | 0 | 0 | 0  | 10 | 6  | 0 | 0 | 0 | 0 | 0 |
| 0 | 0 | 0 | 4  | 9  | 2  | 0 | 0 | 0 | 0 | 0 |
| 0 | 0 | 0 | 5  | 10 | 4  | 0 | 0 | 0 | 0 | 0 |
| 0 | 0 | 0 | 3  | 8  | 5  | 0 | 0 | 0 | 0 | 0 |
| 0 | 0 | 0 | 4  | 15 | 2  | 0 | 0 | 0 | 0 | 0 |
| 0 | 0 | 0 | 2  | 5  | 4  | 0 | 0 | 0 | 0 | 0 |
| 0 | 0 | 0 | 2  | 9  | 4  | 0 | 0 | 0 | 0 | 0 |
| 0 | 0 | 0 | 2  | 7  | 3  | 0 | 0 | 0 | 1 | 0 |

|   |   |   |   |   |   |   |   |   |   |   |
|---|---|---|---|---|---|---|---|---|---|---|
| 0 | 0 | 0 | 3 | 7 | 1 | 0 | 0 | 0 | 0 | 0 |
| 1 | 0 | 0 | 2 | 0 | 3 | 0 | 0 | 0 | 0 | 0 |
| 0 | 0 | 0 | 1 | 2 | 1 | 0 | 0 | 0 | 0 | 0 |
| 0 | 0 | 0 | 2 | 2 | 2 | 0 | 0 | 0 | 2 | 0 |
| 0 | 0 | 0 | 5 | 2 | 4 | 0 | 0 | 0 | 0 | 0 |
| 0 | 0 | 0 | 1 | 5 | 1 | 0 | 0 | 0 | 0 | 0 |
| 0 | 0 | 0 | 1 | 3 | 0 | 0 | 0 | 0 | 0 | 0 |
| 0 | 0 | 0 | 1 | 3 | 3 | 0 | 0 | 0 | 0 | 0 |
| 0 | 0 | 0 | 6 | 1 | 1 | 0 | 0 | 0 | 0 | 0 |
| 0 | 0 | 0 | 5 | 0 | 0 | 0 | 0 | 0 | 0 | 0 |
| 0 | 0 | 0 | 2 | 8 | 2 | 0 | 0 | 0 | 0 | 0 |
| 0 | 0 | 0 | 2 | 4 | 1 | 0 | 0 | 0 | 0 | 0 |
| 0 | 0 | 0 | 3 | 1 | 1 | 0 | 0 | 0 | 0 | 0 |
| 0 | 0 | 0 | 1 | 0 | 2 | 0 | 0 | 0 | 0 | 0 |
| 0 | 0 | 0 | 2 | 2 | 1 | 0 | 0 | 0 | 0 | 0 |
| 0 | 0 | 0 | 2 | 2 | 1 | 0 | 0 | 0 | 0 | 0 |
| 0 | 0 | 0 | 5 | 1 | 1 | 0 | 0 | 0 | 0 | 0 |
| 0 | 0 | 0 | 6 | 3 | 2 | 0 | 0 | 0 | 0 | 0 |
| 0 | 0 | 0 | 6 | 2 | 0 | 0 | 0 | 0 | 0 | 0 |
| 0 | 0 | 0 | 5 | 2 | 3 | 0 | 0 | 0 | 0 | 0 |
| 0 | 0 | 0 | 5 | 4 | 4 | 0 | 0 | 0 | 0 | 0 |
| 0 | 0 | 0 | 5 | 0 | 0 | 0 | 0 | 0 | 0 | 0 |
| 0 | 0 | 0 | 6 | 0 | 0 | 0 | 0 | 0 | 0 | 0 |
| 0 | 0 | 0 | 6 | 0 | 0 | 0 | 0 | 0 | 0 | 0 |
| 0 | 0 | 0 | 9 | 0 | 0 | 0 | 0 | 0 | 0 | 0 |
| 0 | 0 | 0 | 4 | 0 | 0 | 0 | 0 | 0 | 0 | 0 |
| 0 | 0 | 0 | 3 | 0 | 2 | 0 | 0 | 0 | 0 | 0 |
| 0 | 0 | 0 | 4 | 3 | 0 | 0 | 0 | 0 | 0 | 0 |
| 0 | 0 | 0 | 2 | 0 | 2 | 0 | 0 | 0 | 0 | 3 |

|   |   |   |   |   |   |   |   |   |   |   |
|---|---|---|---|---|---|---|---|---|---|---|
| 0 | 0 | 0 | 4 | 1 | 1 | 0 | 0 | 0 | 0 | 0 |
| 0 | 0 | 0 | 5 | 0 | 1 | 0 | 0 | 0 | 0 | 0 |
| 0 | 0 | 0 | 3 | 3 | 0 | 0 | 0 | 0 | 0 | 0 |
| 0 | 0 | 0 | 5 | 1 | 0 | 0 | 0 | 0 | 0 | 0 |
| 0 | 0 | 0 | 8 | 1 | 0 | 0 | 0 | 0 | 0 | 0 |
| 0 | 0 | 0 | 3 | 0 | 0 | 0 | 0 | 0 | 0 | 0 |
| 0 | 0 | 0 | 7 | 0 | 1 | 0 | 0 | 0 | 0 | 2 |
| 0 | 0 | 0 | 2 | 0 | 0 | 0 | 0 | 0 | 0 | 0 |
| 0 | 0 | 0 | 6 | 0 | 2 | 0 | 0 | 0 | 0 | 0 |
| 0 | 0 | 0 | 7 | 0 | 0 | 0 | 0 | 0 | 0 | 0 |
| 0 | 0 | 0 | 8 | 0 | 3 | 0 | 0 | 0 | 0 | 0 |
| 0 | 0 | 0 | 4 | 1 | 2 | 0 | 0 | 0 | 0 | 0 |
| 0 | 0 | 0 | 3 | 0 | 0 | 0 | 0 | 0 | 0 | 0 |
| 0 | 0 | 0 | 2 | 1 | 2 | 1 | 0 | 0 | 0 | 0 |
| 0 | 0 | 0 | 4 | 1 | 0 | 0 | 0 | 0 | 0 | 0 |
| 0 | 0 | 0 | 1 | 0 | 1 | 0 | 0 | 0 | 0 | 0 |
| 0 | 0 | 0 | 2 | 0 | 1 | 0 | 0 | 0 | 0 | 0 |
| 0 | 0 | 0 | 2 | 1 | 0 | 0 | 0 | 0 | 0 | 0 |
| 0 | 0 | 0 | 3 | 1 | 1 | 0 | 0 | 0 | 0 | 0 |
| 0 | 0 | 0 | 5 | 2 | 1 | 0 | 0 | 0 | 0 | 0 |
| 0 | 0 | 0 | 4 | 1 | 1 | 0 | 0 | 0 | 0 | 0 |
| 0 | 0 | 0 | 5 | 0 | 2 | 0 | 0 | 0 | 0 | 0 |
| 0 | 0 | 0 | 3 | 0 | 0 | 0 | 0 | 0 | 0 | 0 |
| 0 | 0 | 0 | 6 | 1 | 0 | 0 | 0 | 0 | 0 | 0 |
| 0 | 0 | 0 | 5 | 1 | 0 | 0 | 0 | 0 | 0 | 0 |
| 0 | 0 | 0 | 2 | 1 | 0 | 0 | 0 | 0 | 0 | 3 |
| 0 | 0 | 0 | 3 | 0 | 2 | 0 | 0 | 0 | 0 | 0 |
| 0 | 0 | 0 | 7 | 1 | 0 | 0 | 0 | 0 | 0 | 0 |
| 0 | 0 | 0 | 2 | 0 | 0 | 0 | 0 | 0 | 0 | 0 |

|   |   |   |    |   |   |   |   |   |   |   |
|---|---|---|----|---|---|---|---|---|---|---|
| 0 | 0 | 1 | 1  | 0 | 0 | 0 | 4 | 0 | 0 | 0 |
| 0 | 0 | 0 | 4  | 1 | 1 | 0 | 0 | 0 | 0 | 0 |
| 0 | 0 | 0 | 2  | 0 | 0 | 0 | 0 | 0 | 0 | 0 |
| 0 | 0 | 0 | 2  | 0 | 0 | 0 | 1 | 0 | 0 | 0 |
| 0 | 0 | 0 | 1  | 0 | 0 | 0 | 4 | 0 | 0 | 0 |
| 0 | 0 | 0 | 3  | 1 | 0 | 0 | 1 | 0 | 0 | 0 |
| 0 | 0 | 0 | 7  | 0 | 1 | 0 | 0 | 0 | 0 | 0 |
| 0 | 0 | 0 | 1  | 0 | 0 | 0 | 0 | 0 | 0 | 0 |
| 0 | 0 | 0 | 0  | 0 | 0 | 0 | 0 | 0 | 0 | 0 |
| 0 | 0 | 0 | 5  | 6 | 2 | 0 | 0 | 0 | 0 | 0 |
| 0 | 0 | 0 | 4  | 0 | 0 | 0 | 0 | 0 | 0 | 0 |
| 0 | 0 | 0 | 0  | 0 | 1 | 0 | 0 | 0 | 0 | 0 |
| 0 | 0 | 0 | 0  | 0 | 0 | 0 | 0 | 0 | 0 | 0 |
| 0 | 0 | 0 | 12 | 0 | 0 | 0 | 0 | 0 | 0 | 0 |
| 0 | 0 | 0 | 7  | 0 | 1 | 0 | 3 | 0 | 0 | 0 |
| 0 | 0 | 0 | 7  | 0 | 0 | 0 | 0 | 0 | 0 | 0 |
| 0 | 0 | 0 | 6  | 0 | 0 | 0 | 0 | 0 | 0 | 0 |
| 0 | 0 | 0 | 4  | 0 | 0 | 0 | 0 | 0 | 0 | 0 |
| 0 | 0 | 0 | 7  | 0 | 0 | 0 | 0 | 0 | 0 | 0 |

| orbpap | owepet | palaem | paramo | parexc | parlyr | parnou | patiri | perval | phiaus | phoxoc |
|--------|--------|--------|--------|--------|--------|--------|--------|--------|--------|--------|
| 0      | 0      | 0      | 0      | 0      | 0      | 0      | 0      | 0      | 0      | 1      |
| 0      | 0      | 0      | 0      | 0      | 0      | 0      | 0      | 9      | 0      | 5      |
| 0      | 0      | 0      | 0      | 0      | 0      | 0      | 0      | 1      | 0      | 0      |
| 0      | 0      | 0      | 0      | 0      | 0      | 0      | 0      | 12     | 0      | 0      |
| 0      | 0      | 1      | 0      | 1      | 0      | 0      | 0      | 4      | 0      | 6      |
| 0      | 0      | 1      | 0      | 0      | 0      | 1      | 0      | 7      | 0      | 2      |
| 0      | 0      | 0      | 0      | 0      | 0      | 0      | 0      | 11     | 0      | 1      |
| 0      | 0      | 0      | 0      | 0      | 0      | 0      | 0      | 9      | 0      | 1      |



|   |   |   |   |   |   |   |   |    |   |    |
|---|---|---|---|---|---|---|---|----|---|----|
| 0 | 0 | 0 | 0 | 0 | 0 | 1 | 0 | 9  | 0 | 2  |
| 0 | 0 | 0 | 0 | 0 | 0 | 0 | 0 | 13 | 0 | 1  |
| 0 | 0 | 0 | 0 | 0 | 1 | 0 | 0 | 1  | 0 | 0  |
| 0 | 0 | 0 | 0 | 0 | 0 | 0 | 0 | 4  | 0 | 8  |
| 0 | 0 | 0 | 0 | 0 | 0 | 0 | 1 | 0  | 0 | 2  |
| 0 | 0 | 0 | 0 | 0 | 0 | 0 | 0 | 4  | 0 | 5  |
| 0 | 0 | 0 | 0 | 0 | 3 | 0 | 0 | 10 | 0 | 2  |
| 0 | 0 | 0 | 0 | 0 | 0 | 0 | 0 | 2  | 0 | 20 |
| 1 | 0 | 0 | 0 | 0 | 0 | 1 | 0 | 3  | 0 | 13 |
| 0 | 0 | 0 | 0 | 0 | 0 | 1 | 0 | 2  | 0 | 0  |
| 1 | 0 | 0 | 0 | 0 | 1 | 0 | 0 | 4  | 0 | 1  |
| 0 | 0 | 0 | 0 | 3 | 1 | 0 | 0 | 0  | 0 | 5  |
| 0 | 0 | 1 | 0 | 0 | 0 | 0 | 0 | 5  | 0 | 2  |
| 0 | 0 | 0 | 0 | 1 | 0 | 0 | 0 | 7  | 0 | 8  |
| 0 | 0 | 0 | 0 | 0 | 0 | 1 | 0 | 6  | 0 | 0  |
| 0 | 0 | 0 | 0 | 1 | 0 | 0 | 0 | 10 | 0 | 4  |
| 0 | 0 | 1 | 0 | 0 | 0 | 0 | 0 | 3  | 0 | 6  |
| 0 | 0 | 1 | 0 | 2 | 0 | 0 | 0 | 3  | 0 | 4  |
| 0 | 0 | 0 | 0 | 0 | 0 | 2 | 0 | 9  | 0 | 9  |
| 0 | 0 | 0 | 0 | 0 | 0 | 0 | 0 | 13 | 0 | 4  |
| 0 | 0 | 0 | 0 | 0 | 0 | 0 | 0 | 10 | 0 | 1  |
| 0 | 0 | 0 | 0 | 0 | 0 | 1 | 0 | 9  | 0 | 7  |
| 0 | 0 | 0 | 0 | 0 | 1 | 0 | 0 | 0  | 0 | 1  |
| 0 | 0 | 1 | 0 | 1 | 0 | 0 | 0 | 3  | 0 | 0  |
| 0 | 0 | 0 | 0 | 0 | 0 | 1 | 0 | 1  | 0 | 0  |
| 0 | 0 | 0 | 0 | 0 | 1 | 0 | 0 | 14 | 0 | 2  |
| 0 | 0 | 0 | 0 | 0 | 0 | 1 | 0 | 0  | 0 | 1  |
| 0 | 0 | 0 | 0 | 0 | 0 | 0 | 0 | 1  | 0 | 7  |
| 0 | 0 | 0 | 0 | 0 | 0 | 0 | 0 | 7  | 0 | 6  |

|   |   |   |   |   |   |   |   |   |    |
|---|---|---|---|---|---|---|---|---|----|
| 0 | 0 | 0 | 0 | 0 | 0 | 0 | 6 | 0 | 2  |
| 0 | 0 | 0 | 1 | 0 | 0 | 0 | 1 | 0 | 1  |
| 0 | 0 | 0 | 0 | 0 | 0 | 0 | 6 | 0 | 11 |
| 0 | 0 | 0 | 0 | 0 | 0 | 0 | 3 | 0 | 1  |
| 0 | 0 | 0 | 0 | 0 | 0 | 0 | 0 | 0 | 4  |
| 0 | 0 | 0 | 0 | 0 | 0 | 0 | 1 | 0 | 2  |
| 0 | 0 | 0 | 0 | 0 | 4 | 0 | 2 | 0 | 5  |
| 0 | 0 | 0 | 0 | 0 | 0 | 0 | 3 | 0 | 1  |
| 0 | 0 | 0 | 0 | 0 | 0 | 0 | 1 | 0 | 0  |
| 0 | 0 | 0 | 0 | 0 | 4 | 0 | 0 | 0 | 8  |
| 0 | 0 | 0 | 0 | 0 | 0 | 0 | 0 | 0 | 8  |
| 0 | 0 | 0 | 1 | 0 | 0 | 0 | 1 | 0 | 0  |
| 0 | 0 | 0 | 0 | 0 | 3 | 0 | 1 | 0 | 6  |
| 0 | 0 | 0 | 0 | 0 | 1 | 0 | 2 | 0 | 1  |
| 0 | 0 | 0 | 0 | 0 | 0 | 0 | 0 | 0 | 0  |
| 0 | 0 | 0 | 0 | 0 | 0 | 0 | 0 | 0 | 1  |
| 0 | 0 | 0 | 0 | 0 | 0 | 0 | 1 | 0 | 0  |
| 0 | 0 | 0 | 0 | 0 | 0 | 0 | 0 | 0 | 0  |
| 1 | 0 | 0 | 0 | 0 | 0 | 0 | 2 | 0 | 0  |
| 0 | 0 | 0 | 0 | 0 | 0 | 0 | 0 | 0 | 1  |
| 0 | 0 | 0 | 0 | 0 | 0 | 0 | 0 | 0 | 0  |
| 0 | 0 | 0 | 0 | 0 | 0 | 0 | 0 | 0 | 1  |
| 0 | 0 | 0 | 0 | 0 | 0 | 0 | 4 | 0 | 2  |
| 0 | 0 | 0 | 0 | 0 | 0 | 0 | 1 | 0 | 2  |
| 0 | 0 | 0 | 0 | 0 | 1 | 0 | 2 | 0 | 4  |
| 0 | 0 | 0 | 0 | 0 | 0 | 0 | 0 | 0 | 5  |
| 0 | 3 | 0 | 0 | 0 | 0 | 0 | 1 | 0 | 7  |
| 0 | 0 | 0 | 0 | 0 | 9 | 0 | 1 | 0 | 17 |
| 0 | 0 | 0 | 0 | 0 | 5 | 0 | 1 | 0 | 1  |

|   |   |   |   |   |   |   |    |   |    |
|---|---|---|---|---|---|---|----|---|----|
| 0 | 0 | 0 | 0 | 0 | 2 | 0 | 1  | 0 | 2  |
| 0 | 0 | 1 | 0 | 0 | 1 | 0 | 1  | 0 | 2  |
| 0 | 0 | 1 | 0 | 0 | 1 | 0 | 11 | 0 | 7  |
| 0 | 0 | 0 | 0 | 0 | 0 | 0 | 4  | 0 | 7  |
| 0 | 0 | 0 | 0 | 1 | 3 | 0 | 0  | 0 | 5  |
| 0 | 0 | 0 | 0 | 0 | 2 | 0 | 3  | 0 | 10 |
| 0 | 0 | 0 | 0 | 0 | 1 | 0 | 1  | 0 | 9  |
| 0 | 0 | 0 | 0 | 0 | 0 | 0 | 0  | 0 | 0  |
| 0 | 0 | 0 | 0 | 1 | 0 | 0 | 1  | 0 | 4  |
| 0 | 0 | 0 | 0 | 0 | 2 | 0 | 0  | 0 | 2  |
| 0 | 0 | 0 | 0 | 0 | 7 | 0 | 0  | 0 | 22 |
| 0 | 0 | 2 | 0 | 0 | 2 | 0 | 1  | 0 | 6  |
| 0 | 0 | 0 | 0 | 1 | 0 | 0 | 1  | 0 | 0  |
| 0 | 0 | 0 | 0 | 1 | 0 | 0 | 6  | 0 | 6  |
| 1 | 0 | 0 | 0 | 0 | 0 | 0 | 1  | 0 | 1  |
| 0 | 0 | 0 | 0 | 0 | 1 | 0 | 2  | 0 | 10 |
| 0 | 0 | 0 | 0 | 0 | 0 | 0 | 1  | 0 | 0  |
| 0 | 0 | 0 | 0 | 1 | 0 | 0 | 3  | 0 | 13 |
| 0 | 0 | 0 | 0 | 0 | 2 | 0 | 1  | 0 | 4  |
| 0 | 0 | 0 | 0 | 0 | 1 | 0 | 0  | 0 | 1  |
| 0 | 0 | 0 | 0 | 0 | 0 | 0 | 1  | 0 | 2  |
| 0 | 0 | 0 | 0 | 0 | 0 | 0 | 0  | 0 | 3  |
| 0 | 0 | 0 | 0 | 0 | 0 | 0 | 3  | 0 | 5  |
| 0 | 0 | 0 | 0 | 0 | 0 | 0 | 0  | 0 | 4  |
| 0 | 0 | 0 | 0 | 0 | 0 | 0 | 1  | 0 | 0  |
| 1 | 0 | 0 | 0 | 0 | 1 | 0 | 0  | 0 | 3  |
| 0 | 0 | 0 | 0 | 0 | 0 | 0 | 0  | 0 | 5  |
| 0 | 0 | 0 | 0 | 1 | 0 | 0 | 2  | 0 | 8  |
| 0 | 0 | 0 | 0 | 0 | 0 | 0 | 8  | 0 | 1  |

|   |   |   |   |   |   |   |   |   |   |    |
|---|---|---|---|---|---|---|---|---|---|----|
| 0 | 0 | 0 | 0 | 0 | 1 | 0 | 1 | 2 | 0 | 3  |
| 0 | 0 | 0 | 0 | 0 | 1 | 0 | 0 | 0 | 0 | 1  |
| 0 | 0 | 0 | 0 | 1 | 1 | 2 | 0 | 0 | 0 | 12 |
| 0 | 0 | 0 | 0 | 2 | 0 | 0 | 0 | 4 | 0 | 7  |
| 0 | 0 | 0 | 0 | 0 | 0 | 0 | 0 | 1 | 0 | 2  |
| 0 | 0 | 0 | 0 | 0 | 0 | 0 | 0 | 3 | 0 | 0  |
| 0 | 0 | 0 | 0 | 1 | 0 | 0 | 0 | 1 | 0 | 0  |
| 0 | 3 | 0 | 0 | 0 | 0 | 0 | 0 | 2 | 0 | 1  |
| 0 | 1 | 0 | 0 | 0 | 1 | 0 | 0 | 1 | 0 | 2  |
| 1 | 0 | 0 | 0 | 0 | 3 | 0 | 0 | 4 | 0 | 2  |
| 0 | 0 | 0 | 0 | 0 | 0 | 0 | 0 | 5 | 0 | 5  |
| 0 | 0 | 0 | 0 | 0 | 2 | 0 | 0 | 1 | 0 | 3  |
| 0 | 0 | 0 | 0 | 0 | 0 | 0 | 1 | 3 | 0 | 8  |
| 0 | 1 | 0 | 0 | 0 | 0 | 0 | 2 | 6 | 0 | 6  |
| 0 | 0 | 0 | 0 | 2 | 0 | 0 | 0 | 1 | 0 | 1  |
| 0 | 0 | 0 | 0 | 0 | 0 | 0 | 0 | 3 | 0 | 0  |
| 0 | 0 | 0 | 0 | 0 | 0 | 0 | 0 | 5 | 0 | 3  |
| 0 | 0 | 0 | 0 | 1 | 1 | 0 | 0 | 0 | 0 | 2  |
| 0 | 0 | 0 | 0 | 2 | 0 | 0 | 2 | 8 | 0 | 10 |
| 0 | 1 | 0 | 0 | 1 | 2 | 0 | 0 | 0 | 0 | 0  |
| 0 | 0 | 0 | 0 | 0 | 0 | 0 | 0 | 3 | 0 | 0  |
| 0 | 0 | 0 | 0 | 0 | 0 | 0 | 0 | 9 | 0 | 2  |
| 0 | 0 | 0 | 0 | 0 | 0 | 0 | 0 | 5 | 0 | 4  |
| 0 | 0 | 0 | 1 | 0 | 0 | 0 | 0 | 1 | 0 | 6  |
| 0 | 0 | 0 | 0 | 0 | 0 | 1 | 0 | 0 | 0 | 6  |
| 1 | 0 | 0 | 0 | 1 | 0 | 0 | 0 | 7 | 0 | 7  |
| 0 | 0 | 0 | 0 | 0 | 0 | 3 | 0 | 6 | 0 | 9  |
| 0 | 0 | 0 | 0 | 0 | 0 | 0 | 0 | 6 | 0 | 4  |
| 0 | 0 | 0 | 0 | 1 | 0 | 0 | 0 | 3 | 0 | 1  |

|   |   |   |   |   |   |   |   |   |    |
|---|---|---|---|---|---|---|---|---|----|
| 0 | 0 | 0 | 0 | 0 | 0 | 0 | 3 | 0 | 1  |
| 0 | 0 | 0 | 0 | 0 | 0 | 0 | 1 | 0 | 2  |
| 0 | 0 | 0 | 0 | 0 | 0 | 0 | 3 | 0 | 0  |
| 0 | 0 | 0 | 0 | 2 | 0 | 0 | 3 | 0 | 5  |
| 0 | 0 | 0 | 0 | 0 | 0 | 0 | 4 | 0 | 3  |
| 0 | 0 | 0 | 0 | 0 | 0 | 0 | 2 | 0 | 5  |
| 0 | 0 | 1 | 0 | 0 | 0 | 1 | 3 | 0 | 5  |
| 0 | 0 | 0 | 0 | 0 | 0 | 0 | 2 | 0 | 1  |
| 0 | 0 | 0 | 0 | 0 | 0 | 0 | 4 | 0 | 3  |
| 0 | 0 | 0 | 0 | 0 | 0 | 0 | 2 | 0 | 1  |
| 0 | 0 | 0 | 0 | 0 | 0 | 0 | 2 | 0 | 5  |
| 0 | 0 | 0 | 0 | 0 | 0 | 0 | 2 | 0 | 1  |
| 0 | 0 | 0 | 0 | 0 | 0 | 0 | 2 | 0 | 8  |
| 0 | 0 | 0 | 0 | 0 | 0 | 1 | 7 | 0 | 11 |
| 0 | 0 | 0 | 0 | 0 | 0 | 0 | 6 | 0 | 1  |
| 0 | 0 | 0 | 0 | 0 | 0 | 0 | 0 | 0 | 0  |
| 0 | 0 | 0 | 0 | 0 | 0 | 0 | 0 | 0 | 2  |
| 0 | 0 | 0 | 0 | 0 | 0 | 1 | 1 | 0 | 2  |
| 0 | 0 | 0 | 0 | 0 | 0 | 0 | 0 | 0 | 0  |
| 0 | 0 | 0 | 0 | 0 | 0 | 0 | 0 | 0 | 1  |
| 0 | 0 | 0 | 0 | 0 | 0 | 0 | 6 | 0 | 9  |
| 0 | 0 | 0 | 0 | 0 | 0 | 0 | 8 | 0 | 7  |
| 0 | 0 | 0 | 0 | 0 | 0 | 0 | 0 | 0 | 5  |
| 0 | 0 | 0 | 0 | 0 | 0 | 0 | 5 | 0 | 2  |
| 0 | 0 | 0 | 0 | 0 | 0 | 0 | 0 | 0 | 0  |
| 0 | 0 | 0 | 0 | 0 | 0 | 0 | 2 | 0 | 0  |
| 0 | 0 | 0 | 0 | 1 | 0 | 0 | 1 | 0 | 0  |
| 0 | 0 | 0 | 0 | 0 | 0 | 2 | 4 | 0 | 2  |
| 0 | 0 | 0 | 0 | 0 | 0 | 1 | 3 | 0 | 0  |

|   |   |   |   |   |   |   |   |   |    |   |    |
|---|---|---|---|---|---|---|---|---|----|---|----|
| 0 | 0 | 0 | 0 | 0 | 0 | 0 | 0 | 0 | 1  | 0 | 0  |
| 0 | 0 | 0 | 0 | 0 | 0 | 0 | 0 | 0 | 3  | 0 | 12 |
| 0 | 0 | 0 | 0 | 0 | 0 | 0 | 0 | 0 | 3  | 0 | 4  |
| 0 | 0 | 0 | 0 | 0 | 0 | 0 | 0 | 0 | 2  | 0 | 7  |
| 0 | 0 | 0 | 0 | 0 | 0 | 0 | 0 | 0 | 0  | 0 | 4  |
| 0 | 0 | 0 | 0 | 0 | 0 | 0 | 0 | 0 | 2  | 0 | 0  |
| 0 | 0 | 0 | 0 | 1 | 0 | 0 | 0 | 0 | 4  | 0 | 3  |
| 0 | 0 | 0 | 0 | 0 | 0 | 0 | 0 | 0 | 0  | 0 | 9  |
| 0 | 0 | 0 | 0 | 0 | 0 | 0 | 0 | 0 | 3  | 0 | 2  |
| 0 | 0 | 0 | 0 | 0 | 0 | 0 | 0 | 0 | 2  | 0 | 1  |
| 0 | 0 | 0 | 0 | 0 | 0 | 0 | 0 | 0 | 0  | 0 | 1  |
| 0 | 0 | 0 | 0 | 0 | 0 | 0 | 0 | 0 | 3  | 0 | 5  |
| 0 | 0 | 0 | 0 | 0 | 0 | 0 | 0 | 0 | 0  | 0 | 1  |
| 0 | 0 | 0 | 0 | 0 | 0 | 0 | 0 | 0 | 0  | 0 | 0  |
| 0 | 0 | 0 | 0 | 0 | 0 | 0 | 0 | 0 | 3  | 0 | 6  |
| 0 | 0 | 0 | 0 | 0 | 0 | 0 | 0 | 0 | 5  | 0 | 2  |
| 0 | 0 | 0 | 0 | 5 | 0 | 0 | 1 | 0 | 1  | 0 | 0  |
| 0 | 0 | 0 | 0 | 0 | 0 | 0 | 2 | 0 | 2  | 0 | 9  |
| 0 | 0 | 0 | 0 | 1 | 0 | 0 | 0 | 0 | 9  | 0 | 3  |
| 0 | 0 | 0 | 0 | 0 | 0 | 0 | 1 | 0 | 1  | 0 | 6  |
| 0 | 0 | 0 | 0 | 0 | 0 | 0 | 1 | 0 | 6  | 0 | 7  |
| 0 | 0 | 0 | 0 | 1 | 0 | 0 | 3 | 0 | 1  | 0 | 6  |
| 0 | 0 | 0 | 0 | 0 | 0 | 0 | 0 | 0 | 2  | 0 | 4  |
| 0 | 0 | 0 | 0 | 4 | 0 | 0 | 1 | 0 | 0  | 0 | 7  |
| 0 | 0 | 0 | 0 | 0 | 0 | 0 | 1 | 0 | 11 | 0 | 9  |
| 0 | 0 | 0 | 0 | 0 | 0 | 0 | 0 | 0 | 2  | 0 | 7  |
| 0 | 0 | 0 | 0 | 0 | 0 | 0 | 1 | 0 | 6  | 0 | 1  |
| 0 | 0 | 0 | 0 | 0 | 0 | 0 | 0 | 0 | 7  | 0 | 6  |
| 0 | 0 | 0 | 0 | 0 | 0 | 0 | 0 | 0 | 5  | 0 | 0  |

|   |   |   |   |   |   |   |    |   |    |
|---|---|---|---|---|---|---|----|---|----|
| 0 | 0 | 0 | 0 | 0 | 0 | 0 | 15 | 0 | 8  |
| 0 | 0 | 0 | 0 | 1 | 0 | 0 | 12 | 0 | 11 |
| 0 | 0 | 0 | 0 | 0 | 0 | 0 | 4  | 0 | 3  |
| 0 | 0 | 0 | 0 | 0 | 0 | 0 | 12 | 0 | 2  |
| 0 | 0 | 0 | 0 | 0 | 0 | 0 | 9  | 0 | 3  |
| 0 | 0 | 0 | 0 | 0 | 0 | 0 | 2  | 0 | 7  |
| 0 | 0 | 0 | 0 | 0 | 0 | 0 | 0  | 0 | 3  |
| 0 | 0 | 0 | 0 | 1 | 0 | 0 | 2  | 0 | 0  |
| 0 | 0 | 0 | 0 | 1 | 0 | 0 | 1  | 0 | 7  |
| 0 | 0 | 0 | 0 | 0 | 0 | 0 | 18 | 0 | 8  |
| 0 | 0 | 0 | 0 | 2 | 0 | 0 | 0  | 0 | 1  |
| 0 | 0 | 0 | 0 | 0 | 0 | 0 | 0  | 0 | 2  |
| 0 | 0 | 0 | 0 | 0 | 0 | 0 | 0  | 0 | 0  |
| 0 | 0 | 0 | 0 | 2 | 0 | 0 | 6  | 0 | 6  |
| 0 | 0 | 0 | 0 | 1 | 0 | 0 | 6  | 0 | 2  |
| 0 | 0 | 0 | 0 | 0 | 0 | 0 | 10 | 0 | 1  |
| 0 | 0 | 0 | 0 | 1 | 0 | 0 | 10 | 0 | 1  |
| 0 | 0 | 0 | 0 | 0 | 0 | 0 | 8  | 0 | 1  |
| 0 | 0 | 0 | 0 | 0 | 0 | 0 | 2  | 0 | 0  |
| 0 | 0 | 0 | 0 | 0 | 0 | 0 | 1  | 0 | 0  |
| 0 | 0 | 0 | 0 | 0 | 0 | 0 | 3  | 0 | 2  |
| 0 | 0 | 0 | 0 | 0 | 0 | 0 | 1  | 0 | 4  |
| 0 | 0 | 0 | 0 | 0 | 0 | 0 | 1  | 0 | 0  |
| 0 | 0 | 0 | 0 | 0 | 0 | 0 | 4  | 0 | 3  |
| 0 | 0 | 0 | 0 | 0 | 0 | 0 | 12 | 0 | 3  |
| 0 | 0 | 0 | 0 | 0 | 0 | 0 | 1  | 0 | 0  |
| 0 | 0 | 0 | 0 | 0 | 0 | 0 | 5  | 0 | 1  |
| 0 | 0 | 0 | 0 | 0 | 0 | 0 | 7  | 0 | 0  |
| 0 | 0 | 0 | 0 | 0 | 0 | 0 | 14 | 0 | 2  |





|   |   |   |   |   |   |   |   |    |   |    |
|---|---|---|---|---|---|---|---|----|---|----|
| 0 | 0 | 0 | 0 | 0 | 0 | 1 | 0 | 4  | 0 | 10 |
| 0 | 0 | 0 | 0 | 0 | 0 | 0 | 0 | 4  | 0 | 2  |
| 0 | 0 | 0 | 0 | 0 | 0 | 1 | 0 | 2  | 0 | 3  |
| 0 | 0 | 0 | 0 | 0 | 0 | 1 | 0 | 5  | 0 | 5  |
| 0 | 0 | 0 | 0 | 0 | 0 | 0 | 0 | 4  | 0 | 5  |
| 0 | 0 | 0 | 0 | 0 | 0 | 0 | 0 | 3  | 0 | 10 |
| 0 | 0 | 0 | 0 | 0 | 0 | 1 | 0 | 9  | 0 | 3  |
| 0 | 0 | 0 | 0 | 0 | 0 | 0 | 0 | 6  | 0 | 6  |
| 0 | 0 | 0 | 0 | 0 | 0 | 0 | 0 | 4  | 0 | 4  |
| 0 | 0 | 0 | 0 | 0 | 0 | 0 | 0 | 2  | 0 | 8  |
| 0 | 0 | 0 | 0 | 0 | 0 | 0 | 0 | 11 | 0 | 7  |
| 0 | 0 | 0 | 0 | 0 | 0 | 0 | 0 | 5  | 0 | 1  |
| 0 | 0 | 0 | 0 | 0 | 0 | 0 | 0 | 6  | 0 | 11 |
| 0 | 0 | 0 | 0 | 0 | 0 | 0 | 0 | 11 | 0 | 1  |
| 0 | 0 | 0 | 0 | 0 | 0 | 0 | 0 | 3  | 0 | 0  |
| 0 | 0 | 0 | 0 | 0 | 0 | 0 | 0 | 8  | 0 | 1  |
| 0 | 0 | 0 | 0 | 0 | 0 | 0 | 0 | 5  | 0 | 3  |
| 0 | 0 | 0 | 0 | 0 | 0 | 0 | 0 | 4  | 0 | 3  |
| 0 | 0 | 0 | 0 | 0 | 0 | 0 | 0 | 5  | 0 | 3  |
| 0 | 0 | 0 | 0 | 0 | 0 | 0 | 0 | 1  | 0 | 0  |
| 0 | 0 | 0 | 0 | 0 | 0 | 0 | 0 | 5  | 0 | 3  |
| 0 | 0 | 0 | 0 | 0 | 0 | 0 | 0 | 2  | 0 | 1  |
| 0 | 0 | 0 | 0 | 0 | 1 | 1 | 0 | 4  | 0 | 1  |
| 0 | 0 | 0 | 0 | 0 | 0 | 0 | 0 | 7  | 0 | 6  |
| 0 | 0 | 0 | 0 | 0 | 0 | 0 | 0 | 5  | 0 | 4  |
| 0 | 0 | 0 | 0 | 0 | 0 | 0 | 0 | 3  | 0 | 0  |
| 0 | 0 | 0 | 0 | 0 | 0 | 0 | 0 | 7  | 0 | 1  |
| 0 | 0 | 0 | 0 | 0 | 0 | 0 | 0 | 1  | 0 | 1  |
| 0 | 0 | 0 | 0 | 0 | 0 | 0 | 0 | 6  | 0 | 3  |

|   |   |   |   |   |   |   |   |    |    |    |
|---|---|---|---|---|---|---|---|----|----|----|
| 0 | 0 | 0 | 0 | 0 | 0 | 0 | 0 | 15 | 6  |    |
| 0 | 0 | 0 | 0 | 0 | 0 | 0 | 0 | 4  | 7  |    |
| 0 | 0 | 0 | 0 | 0 | 0 | 0 | 0 | 5  | 2  |    |
| 0 | 0 | 0 | 0 | 0 | 0 | 0 | 0 | 7  | 7  |    |
| 0 | 0 | 0 | 0 | 0 | 0 | 0 | 0 | 7  | 0  |    |
| 0 | 0 | 0 | 0 | 0 | 0 | 1 | 0 | 9  | 2  |    |
| 0 | 0 | 0 | 0 | 0 | 0 | 0 | 0 | 10 | 1  |    |
| 0 | 0 | 0 | 0 | 0 | 0 | 0 | 0 | 4  | 7  |    |
| 0 | 0 | 0 | 0 | 0 | 0 | 0 | 0 | 5  | 6  |    |
| 0 | 0 | 0 | 0 | 0 | 0 | 0 | 0 | 9  | 4  |    |
| 0 | 0 | 0 | 0 | 0 | 0 | 0 | 0 | 3  | 3  |    |
| 0 | 0 | 0 | 0 | 0 | 0 | 0 | 0 | 3  | 2  |    |
| 0 | 0 | 0 | 0 | 0 | 0 | 0 | 0 | 5  | 3  |    |
| 0 | 0 | 0 | 0 | 0 | 0 | 0 | 0 | 7  | 4  |    |
| 1 | 0 | 0 | 0 | 0 | 0 | 0 | 0 | 2  | 0  |    |
| 0 | 0 | 0 | 0 | 0 | 0 | 0 | 0 | 4  | 25 |    |
| 0 | 1 | 0 | 0 | 0 | 0 | 0 | 0 | 4  | 4  |    |
| 0 | 0 | 0 | 0 | 0 | 0 | 0 | 0 | 5  | 8  |    |
| 0 | 0 | 0 | 0 | 0 | 1 | 0 | 0 | 7  | 2  |    |
| 0 | 0 | 0 | 0 | 0 | 0 | 0 | 0 | 1  | 2  |    |
| 0 | 0 | 0 | 0 | 0 | 0 | 0 | 0 | 2  | 3  |    |
| 0 | 0 | 0 | 0 | 0 | 0 | 0 | 0 | 6  | 7  |    |
| 1 | 2 | 0 | 0 | 0 | 1 | 0 | 0 | 0  | 2  | 1  |
| 0 | 0 | 0 | 0 | 0 | 1 | 0 | 0 | 3  | 0  | 4  |
| 0 | 0 | 1 | 0 | 0 | 0 | 2 | 0 | 5  | 0  | 2  |
| 0 | 0 | 0 | 0 | 0 | 0 | 0 | 0 | 1  | 0  | 0  |
| 0 | 0 | 0 | 0 | 0 | 0 | 0 | 0 | 1  | 0  | 2  |
| 1 | 1 | 0 | 0 | 0 | 0 | 0 | 0 | 0  | 0  | 11 |
| 1 | 0 | 0 | 0 | 0 | 0 | 0 | 0 | 1  | 0  | 0  |

|   |   |   |   |   |   |   |   |   |   |    |
|---|---|---|---|---|---|---|---|---|---|----|
| 0 | 0 | 0 | 0 | 0 | 0 | 0 | 1 | 1 | 0 | 0  |
| 0 | 1 | 0 | 0 | 0 | 0 | 0 | 0 | 8 | 0 | 0  |
| 1 | 1 | 0 | 0 | 0 | 0 | 0 | 0 | 1 | 1 | 3  |
| 0 | 0 | 0 | 0 | 0 | 1 | 0 | 0 | 0 | 0 | 5  |
| 0 | 0 | 0 | 0 | 0 | 0 | 1 | 0 | 0 | 0 | 6  |
| 0 | 1 | 0 | 0 | 0 | 1 | 0 | 0 | 6 | 0 | 0  |
| 1 | 0 | 0 | 0 | 0 | 0 | 0 | 0 | 1 | 0 | 1  |
| 0 | 0 | 0 | 0 | 0 | 0 | 0 | 0 | 6 | 0 | 11 |
| 0 | 1 | 0 | 0 | 0 | 0 | 0 | 2 | 4 | 0 | 11 |
| 0 | 0 | 0 | 0 | 0 | 0 | 0 | 0 | 0 | 0 | 2  |
| 0 | 0 | 0 | 0 | 0 | 0 | 0 | 1 | 1 | 0 | 7  |
| 0 | 0 | 0 | 0 | 0 | 0 | 0 | 0 | 0 | 0 | 14 |
| 0 | 0 | 0 | 0 | 0 | 0 | 0 | 0 | 5 | 0 | 9  |
| 0 | 0 | 0 | 0 | 0 | 0 | 0 | 0 | 0 | 0 | 5  |
| 0 | 0 | 0 | 0 | 0 | 0 | 0 | 0 | 2 | 0 | 3  |
| 0 | 0 | 0 | 0 | 0 | 1 | 0 | 0 | 2 | 0 | 2  |
| 0 | 0 | 0 | 0 | 0 | 1 | 0 | 0 | 3 | 0 | 19 |
| 0 | 0 | 0 | 0 | 0 | 0 | 0 | 0 | 1 | 0 | 11 |
| 0 | 0 | 0 | 0 | 0 | 0 | 0 | 1 | 0 | 0 | 7  |
| 0 | 0 | 0 | 0 | 0 | 0 | 0 | 0 | 2 | 0 | 4  |
| 0 | 0 | 0 | 0 | 0 | 0 | 0 | 0 | 2 | 0 | 2  |
| 0 | 0 | 0 | 0 | 0 | 0 | 0 | 0 | 6 | 0 | 2  |
| 0 | 0 | 0 | 0 | 0 | 0 | 0 | 0 | 4 | 0 | 2  |
| 0 | 0 | 0 | 0 | 0 | 0 | 1 | 0 | 4 | 0 | 12 |
| 0 | 0 | 0 | 0 | 0 | 0 | 0 | 0 | 6 | 0 | 8  |
| 0 | 0 | 0 | 0 | 0 | 1 | 0 | 0 | 7 | 0 | 7  |
| 0 | 0 | 0 | 0 | 0 | 0 | 0 | 0 | 2 | 0 | 3  |
| 0 | 0 | 0 | 0 | 0 | 0 | 0 | 0 | 1 | 0 | 4  |
| 0 | 0 | 0 | 0 | 0 | 0 | 0 | 0 | 2 | 0 | 2  |

|   |   |   |   |   |   |   |   |    |   |    |
|---|---|---|---|---|---|---|---|----|---|----|
| 0 | 0 | 0 | 0 | 0 | 1 | 0 | 0 | 6  | 0 | 4  |
| 0 | 0 | 0 | 0 | 0 | 0 | 0 | 0 | 2  | 0 | 6  |
| 0 | 0 | 0 | 0 | 0 | 0 | 0 | 0 | 5  | 0 | 4  |
| 0 | 0 | 0 | 0 | 0 | 0 | 0 | 0 | 2  | 0 | 5  |
| 0 | 0 | 0 | 0 | 0 | 0 | 0 | 0 | 3  | 0 | 10 |
| 0 | 0 | 0 | 0 | 0 | 0 | 0 | 0 | 5  | 0 | 3  |
| 0 | 0 | 0 | 0 | 0 | 0 | 0 | 0 | 2  | 0 | 10 |
| 0 | 0 | 0 | 0 | 0 | 0 | 4 | 0 | 10 | 0 | 5  |
| 0 | 0 | 0 | 0 | 0 | 0 | 1 | 0 | 2  | 0 | 4  |
| 0 | 0 | 0 | 0 | 0 | 0 | 0 | 0 | 7  | 0 | 3  |
| 0 | 0 | 0 | 0 | 0 | 0 | 0 | 0 | 10 | 0 | 11 |
| 0 | 0 | 0 | 0 | 0 | 0 | 0 | 0 | 4  | 0 | 3  |
| 0 | 0 | 0 | 0 | 0 | 0 | 0 | 0 | 5  | 0 | 3  |
| 0 | 0 | 0 | 0 | 0 | 0 | 0 | 0 | 3  | 0 | 4  |
| 0 | 0 | 0 | 0 | 0 | 0 | 0 | 0 | 10 | 0 | 2  |
| 0 | 0 | 0 | 0 | 0 | 0 | 0 | 0 | 4  | 0 | 1  |
| 0 | 0 | 0 | 0 | 0 | 0 | 0 | 0 | 4  | 0 | 7  |
| 0 | 0 | 0 | 0 | 0 | 0 | 0 | 0 | 3  | 0 | 1  |
| 0 | 0 | 0 | 0 | 0 | 0 | 0 | 0 | 6  | 0 | 11 |
| 0 | 0 | 0 | 0 | 0 | 0 | 1 | 0 | 17 | 0 | 2  |
| 0 | 0 | 0 | 0 | 0 | 0 | 0 | 0 | 10 | 0 | 5  |
| 0 | 0 | 0 | 0 | 0 | 0 | 8 | 0 | 3  | 0 | 1  |
| 0 | 0 | 0 | 0 | 0 | 0 | 0 | 0 | 8  | 0 | 5  |
| 0 | 0 | 0 | 0 | 0 | 0 | 0 | 0 | 4  | 0 | 6  |
| 0 | 0 | 0 | 0 | 0 | 0 | 2 | 0 | 9  | 0 | 9  |
| 0 | 0 | 0 | 0 | 0 | 0 | 0 | 0 | 5  | 0 | 2  |
| 0 | 0 | 0 | 0 | 0 | 0 | 0 | 0 | 2  | 0 | 2  |
| 0 | 0 | 0 | 0 | 0 | 0 | 0 | 0 | 7  | 0 | 12 |
| 0 | 0 | 0 | 0 | 0 | 0 | 0 | 0 | 1  | 0 | 5  |

|   |   |   |   |   |   |   |   |    |   |    |
|---|---|---|---|---|---|---|---|----|---|----|
| 0 | 0 | 0 | 0 | 0 | 0 | 0 | 0 | 18 | 0 | 12 |
| 0 | 0 | 0 | 0 | 0 | 0 | 0 | 0 | 6  | 0 | 5  |
| 0 | 0 | 0 | 0 | 0 | 0 | 0 | 0 | 0  | 0 | 4  |
| 0 | 0 | 0 | 0 | 0 | 1 | 2 | 0 | 4  | 0 | 4  |
| 0 | 0 | 0 | 0 | 0 | 0 | 0 | 0 | 0  | 0 | 3  |
| 0 | 0 | 0 | 0 | 0 | 0 | 0 | 0 | 5  | 0 | 9  |
| 0 | 0 | 0 | 0 | 0 | 0 | 0 | 0 | 8  | 0 | 0  |
| 0 | 0 | 0 | 0 | 0 | 0 | 1 | 0 | 3  | 0 | 1  |
| 0 | 0 | 0 | 0 | 0 | 0 | 0 | 0 | 2  | 0 | 3  |
| 0 | 0 | 0 | 0 | 0 | 0 | 0 | 0 | 10 | 0 | 5  |
| 0 | 0 | 0 | 0 | 0 | 0 | 0 | 0 | 8  | 0 | 6  |
| 0 | 0 | 0 | 0 | 0 | 0 | 0 | 0 | 10 | 0 | 6  |
| 0 | 0 | 0 | 0 | 0 | 0 | 0 | 0 | 11 | 0 | 10 |
| 0 | 0 | 0 | 0 | 0 | 0 | 0 | 0 | 0  | 0 | 6  |
| 0 | 0 | 0 | 0 | 0 | 0 | 0 | 0 | 9  | 0 | 10 |
| 0 | 0 | 0 | 0 | 0 | 0 | 0 | 0 | 0  | 0 | 9  |
| 0 | 0 | 0 | 0 | 0 | 0 | 0 | 0 | 2  | 0 | 22 |
| 0 | 0 | 0 | 0 | 0 | 0 | 1 | 0 | 3  | 0 | 12 |
| 0 | 0 | 0 | 0 | 0 | 0 | 1 | 0 | 4  | 0 | 15 |
| 0 | 0 | 0 | 0 | 0 | 0 | 1 | 0 | 11 | 0 | 5  |
| 0 | 0 | 0 | 0 | 0 | 2 | 0 | 0 | 8  | 0 | 4  |
| 0 | 0 | 0 | 0 | 0 | 2 | 0 | 0 | 9  | 0 | 5  |
| 1 | 0 | 0 | 0 | 0 | 6 | 6 | 0 | 9  | 0 | 6  |
| 0 | 0 | 0 | 0 | 0 | 2 | 1 | 0 | 2  | 0 | 4  |
| 0 | 0 | 0 | 0 | 0 | 0 | 0 | 0 | 0  | 0 | 4  |
| 0 | 0 | 0 | 0 | 0 | 1 | 0 | 0 | 1  | 0 | 3  |
| 0 | 0 | 0 | 0 | 0 | 1 | 1 | 0 | 3  | 0 | 3  |
| 0 | 0 | 0 | 0 | 0 | 0 | 0 | 0 | 5  | 0 | 5  |
| 0 | 0 | 0 | 0 | 0 | 0 | 2 | 0 | 1  | 1 | 7  |



| methal | micten | mussen | mysiad | nemert | neosin | nicaes | notoma | notsca | nuchar | olifat |   |
|--------|--------|--------|--------|--------|--------|--------|--------|--------|--------|--------|---|
| 0      | 0      | 0      | 0      | 1      | 1      | 0      | 2      | 0      | 2      | 0      | 0 |
| 0      | 0      | 0      | 0      | 0      | 2      | 0      | 0      | 0      | 0      | 0      | 0 |
| 0      | 0      | 0      | 0      | 0      | 0      | 0      | 0      | 0      | 0      | 0      | 0 |
| 0      | 0      | 0      | 0      | 1      | 3      | 0      | 0      | 0      | 0      | 0      | 0 |
| 0      | 0      | 0      | 0      | 0      | 3      | 0      | 0      | 0      | 1      | 0      | 0 |
| 0      | 0      | 0      | 0      | 0      | 0      | 0      | 1      | 0      | 1      | 0      | 0 |
| 0      | 0      | 0      | 0      | 0      | 0      | 0      | 0      | 0      | 1      | 0      | 0 |
| 0      | 0      | 0      | 1      | 1      | 3      | 0      | 0      | 0      | 1      | 5      | 0 |
| 0      | 0      | 0      | 0      | 0      | 6      | 0      | 0      | 0      | 0      | 9      | 0 |
| 0      | 0      | 1      | 0      | 1      | 1      | 0      | 0      | 0      | 0      | 2      | 0 |
| 0      | 0      | 0      | 0      | 0      | 0      | 0      | 0      | 0      | 1      | 13     | 0 |
| 0      | 0      | 1      | 0      | 3      | 3      | 0      | 0      | 0      | 0      | 5      | 0 |
| 0      | 0      | 0      | 0      | 0      | 8      | 0      | 0      | 0      | 0      | 4      | 0 |
| 0      | 0      | 0      | 0      | 0      | 0      | 0      | 0      | 0      | 0      | 1      | 0 |
| 0      | 0      | 0      | 1      | 4      | 4      | 0      | 0      | 0      | 0      | 5      | 0 |
| 0      | 0      | 0      | 0      | 0      | 1      | 0      | 0      | 0      | 1      | 0      | 0 |
| 0      | 0      | 0      | 0      | 0      | 1      | 0      | 0      | 0      | 0      | 5      | 0 |
| 0      | 0      | 0      | 0      | 0      | 2      | 0      | 0      | 0      | 0      | 0      | 0 |
| 0      | 0      | 0      | 0      | 1      | 1      | 0      | 0      | 0      | 0      | 0      | 0 |
| 0      | 0      | 0      | 2      | 1      | 1      | 0      | 0      | 0      | 0      | 2      | 0 |
| 0      | 0      | 0      | 0      | 0      | 0      | 0      | 0      | 0      | 0      | 3      | 0 |
| 0      | 0      | 0      | 0      | 0      | 0      | 0      | 0      | 0      | 0      | 4      | 0 |
| 0      | 0      | 0      | 0      | 0      | 1      | 0      | 0      | 0      | 0      | 0      | 0 |
| 0      | 0      | 0      | 0      | 0      | 2      | 0      | 0      | 0      | 0      | 0      | 0 |
| 0      | 0      | 1      | 0      | 0      | 0      | 0      | 1      | 0      | 0      | 2      | 0 |
| 1      | 0      | 0      | 0      | 0      | 1      | 0      | 0      | 0      | 0      | 18     | 0 |
| 0      | 0      | 0      | 0      | 0      | 0      | 0      | 0      | 0      | 0      | 4      | 0 |
| 0      | 0      | 0      | 0      | 0      | 2      | 0      | 0      | 1      | 0      | 2      | 0 |

|   |   |   |   |    |   |   |   |   |    |   |
|---|---|---|---|----|---|---|---|---|----|---|
| 0 | 0 | 0 | 0 | 0  | 0 | 0 | 0 | 0 | 3  | 0 |
| 0 | 0 | 0 | 0 | 1  | 0 | 0 | 0 | 0 | 1  | 0 |
| 0 | 0 | 0 | 0 | 2  | 0 | 0 | 0 | 0 | 5  | 0 |
| 0 | 0 | 0 | 0 | 1  | 0 | 0 | 0 | 0 | 3  | 0 |
| 0 | 0 | 0 | 0 | 11 | 0 | 0 | 0 | 0 | 6  | 0 |
| 0 | 0 | 0 | 0 | 1  | 0 | 1 | 0 | 0 | 2  | 0 |
| 0 | 0 | 0 | 0 | 0  | 0 | 0 | 0 | 0 | 10 | 0 |
| 0 | 0 | 0 | 0 | 4  | 0 | 0 | 0 | 0 | 5  | 0 |
| 0 | 0 | 0 | 0 | 12 | 1 | 0 | 0 | 3 | 0  | 0 |
| 0 | 0 | 0 | 0 | 1  | 0 | 0 | 0 | 0 | 2  | 0 |
| 0 | 2 | 0 | 0 | 1  | 0 | 0 | 0 | 0 | 1  | 0 |
| 0 | 0 | 0 | 0 | 5  | 0 | 0 | 0 | 0 | 2  | 0 |
| 0 | 0 | 0 | 0 | 3  | 0 | 0 | 0 | 0 | 1  | 0 |
| 0 | 0 | 2 | 0 | 3  | 0 | 0 | 0 | 0 | 5  | 0 |
| 0 | 0 | 0 | 0 | 1  | 0 | 0 | 0 | 2 | 0  | 0 |
| 0 | 0 | 0 | 0 | 1  | 0 | 0 | 0 | 2 | 0  | 0 |
| 0 | 0 | 0 | 0 | 2  | 0 | 0 | 0 | 3 | 3  | 0 |
| 0 | 0 | 0 | 0 | 2  | 0 | 0 | 0 | 0 | 2  | 0 |
| 0 | 0 | 0 | 0 | 3  | 0 | 0 | 0 | 0 | 4  | 0 |
| 0 | 1 | 0 | 0 | 9  | 0 | 0 | 0 | 3 | 2  | 0 |
| 1 | 0 | 0 | 0 | 1  | 0 | 0 | 0 | 0 | 18 | 0 |
| 0 | 0 | 0 | 0 | 0  | 0 | 1 | 0 | 0 | 14 | 0 |
| 0 | 0 | 0 | 0 | 0  | 0 | 0 | 0 | 0 | 5  | 0 |
| 0 | 0 | 0 | 0 | 2  | 0 | 1 | 0 | 0 | 0  | 0 |
| 0 | 0 | 0 | 0 | 0  | 0 | 0 | 0 | 0 | 3  | 0 |
| 0 | 0 | 0 | 0 | 2  | 0 | 0 | 1 | 0 | 1  | 0 |
| 0 | 0 | 0 | 0 | 1  | 0 | 0 | 0 | 2 | 1  | 0 |
| 0 | 0 | 0 | 2 | 4  | 0 | 0 | 0 | 0 | 3  | 0 |
| 0 | 0 | 0 | 0 | 0  | 0 | 0 | 0 | 1 | 3  | 0 |





|   |   |   |   |   |   |   |   |   |    |   |
|---|---|---|---|---|---|---|---|---|----|---|
| 0 | 0 | 0 | 0 | 4 | 0 | 0 | 0 | 0 | 3  | 0 |
| 0 | 0 | 0 | 0 | 2 | 0 | 0 | 0 | 0 | 0  | 0 |
| 0 | 0 | 3 | 0 | 3 | 0 | 0 | 0 | 0 | 11 | 0 |
| 0 | 0 | 2 | 0 | 1 | 0 | 0 | 1 | 0 | 4  | 0 |
| 0 | 0 | 0 | 0 | 1 | 0 | 0 | 0 | 0 | 0  | 0 |
| 0 | 0 | 0 | 0 | 0 | 0 | 0 | 0 | 0 | 0  | 0 |
| 0 | 1 | 0 | 0 | 0 | 0 | 0 | 0 | 0 | 0  | 0 |
| 0 | 2 | 0 | 0 | 0 | 0 | 0 | 0 | 1 | 0  | 0 |
| 0 | 0 | 0 | 0 | 0 | 0 | 0 | 0 | 0 | 1  | 0 |
| 0 | 0 | 3 | 0 | 1 | 0 | 0 | 0 | 1 | 2  | 0 |
| 0 | 0 | 0 | 0 | 0 | 0 | 0 | 0 | 0 | 0  | 0 |
| 0 | 0 | 0 | 1 | 1 | 0 | 0 | 0 | 0 | 0  | 0 |
| 0 | 0 | 0 | 0 | 1 | 0 | 0 | 0 | 0 | 5  | 0 |
| 0 | 0 | 0 | 0 | 1 | 0 | 0 | 0 | 1 | 0  | 0 |
| 0 | 0 | 0 | 0 | 1 | 0 | 0 | 0 | 1 | 3  | 0 |
| 0 | 0 | 0 | 0 | 1 | 0 | 0 | 0 | 0 | 0  | 0 |
| 0 | 0 | 0 | 0 | 1 | 0 | 0 | 0 | 0 | 1  | 0 |
| 0 | 0 | 0 | 0 | 5 | 0 | 0 | 0 | 0 | 4  | 0 |
| 0 | 1 | 0 | 0 | 0 | 0 | 0 | 0 | 0 | 1  | 0 |
| 0 | 1 | 0 | 0 | 0 | 0 | 0 | 0 | 0 | 0  | 0 |
| 0 | 0 | 0 | 0 | 0 | 0 | 0 | 0 | 0 | 4  | 0 |
| 0 | 0 | 0 | 2 | 2 | 0 | 0 | 0 | 0 | 0  | 0 |
| 0 | 0 | 3 | 0 | 2 | 0 | 0 | 0 | 0 | 2  | 0 |
| 0 | 0 | 2 | 0 | 2 | 0 | 0 | 0 | 0 | 5  | 0 |
| 0 | 0 | 5 | 0 | 3 | 0 | 1 | 0 | 0 | 9  | 0 |
| 0 | 0 | 0 | 0 | 1 | 0 | 0 | 0 | 0 | 2  | 0 |
| 0 | 0 | 0 | 1 | 1 | 0 | 0 | 0 | 0 | 0  | 0 |
| 0 | 0 | 0 | 0 | 0 | 0 | 0 | 1 | 0 | 0  | 0 |
| 0 | 0 | 0 | 0 | 1 | 0 | 0 | 0 | 1 | 1  | 0 |



|   |   |   |   |   |   |   |   |   |   |   |
|---|---|---|---|---|---|---|---|---|---|---|
| 0 | 1 | 0 | 0 | 0 | 0 | 0 | 0 | 1 | 0 | 0 |
| 0 | 1 | 0 | 0 | 5 | 0 | 0 | 0 | 1 | 4 | 0 |
| 0 | 0 | 0 | 0 | 3 | 0 | 0 | 0 | 1 | 0 | 0 |
| 0 | 0 | 0 | 0 | 0 | 1 | 0 | 0 | 0 | 0 | 0 |
| 0 | 0 | 0 | 0 | 1 | 0 | 3 | 0 | 0 | 0 | 0 |
| 0 | 0 | 0 | 0 | 3 | 0 | 0 | 0 | 0 | 0 | 0 |
| 0 | 0 | 0 | 0 | 3 | 0 | 0 | 0 | 3 | 0 | 0 |
| 0 | 0 | 0 | 0 | 3 | 0 | 3 | 0 | 0 | 1 | 0 |
| 0 | 0 | 0 | 0 | 1 | 0 | 0 | 0 | 0 | 0 | 0 |
| 1 | 0 | 0 | 1 | 0 | 0 | 1 | 0 | 0 | 0 | 0 |
| 0 | 0 | 0 | 0 | 1 | 0 | 0 | 0 | 0 | 0 | 0 |
| 0 | 0 | 0 | 1 | 1 | 0 | 0 | 0 | 1 | 0 | 0 |
| 0 | 0 | 0 | 0 | 0 | 0 | 0 | 0 | 0 | 1 | 0 |
| 0 | 0 | 0 | 0 | 0 | 0 | 2 | 0 | 0 | 0 | 0 |
| 0 | 0 | 0 | 0 | 0 | 0 | 0 | 0 | 1 | 1 | 0 |
| 0 | 0 | 0 | 0 | 2 | 0 | 0 | 0 | 0 | 1 | 0 |
| 0 | 0 | 0 | 0 | 0 | 0 | 0 | 0 | 0 | 0 | 0 |
| 0 | 1 | 0 | 0 | 0 | 0 | 0 | 0 | 4 | 1 | 0 |
| 0 | 0 | 1 | 0 | 0 | 0 | 0 | 0 | 0 | 1 | 0 |
| 0 | 0 | 0 | 0 | 0 | 0 | 0 | 0 | 0 | 6 | 0 |
| 0 | 2 | 0 | 0 | 0 | 0 | 1 | 0 | 0 | 1 | 0 |
| 0 | 0 | 0 | 0 | 1 | 0 | 0 | 0 | 1 | 7 | 0 |
| 0 | 1 | 1 | 0 | 0 | 0 | 0 | 0 | 0 | 7 | 0 |
| 0 | 1 | 0 | 0 | 0 | 0 | 0 | 0 | 0 | 4 | 0 |
| 1 | 0 | 0 | 0 | 4 | 0 | 1 | 0 | 0 | 0 | 0 |
| 1 | 0 | 0 | 0 | 0 | 0 | 1 | 0 | 0 | 0 | 0 |
| 0 | 0 | 0 | 0 | 3 | 0 | 3 | 0 | 0 | 0 | 0 |
| 0 | 0 | 0 | 1 | 4 | 0 | 0 | 0 | 0 | 0 | 0 |
| 0 | 0 | 0 | 0 | 4 | 0 | 0 | 0 | 0 | 0 | 0 |

|   |   |   |   |   |   |   |   |   |   |   |
|---|---|---|---|---|---|---|---|---|---|---|
| 0 | 0 | 0 | 0 | 2 | 0 | 0 | 0 | 0 | 1 | 0 |
| 0 | 0 | 0 | 0 | 0 | 0 | 0 | 0 | 0 | 0 | 0 |
| 0 | 0 | 0 | 0 | 2 | 0 | 1 | 0 | 0 | 0 | 0 |
| 0 | 0 | 0 | 0 | 1 | 0 | 0 | 0 | 0 | 0 | 0 |
| 0 | 0 | 0 | 0 | 0 | 0 | 0 | 0 | 1 | 0 | 0 |
| 0 | 0 | 0 | 0 | 0 | 0 | 0 | 0 | 0 | 0 | 0 |
| 0 | 0 | 0 | 0 | 0 | 0 | 0 | 0 | 0 | 0 | 0 |
| 0 | 0 | 0 | 0 | 1 | 0 | 0 | 0 | 0 | 0 | 0 |
| 0 | 0 | 0 | 1 | 0 | 0 | 0 | 0 | 0 | 0 | 0 |
| 0 | 0 | 0 | 0 | 3 | 0 | 0 | 0 | 0 | 0 | 0 |
| 0 | 0 | 0 | 0 | 1 | 0 | 0 | 0 | 1 | 0 | 0 |
| 0 | 0 | 0 | 0 | 1 | 0 | 0 | 0 | 0 | 0 | 0 |
| 0 | 0 | 0 | 0 | 3 | 0 | 0 | 0 | 0 | 0 | 0 |
| 0 | 0 | 0 | 0 | 4 | 0 | 0 | 0 | 1 | 0 | 0 |
| 0 | 0 | 0 | 0 | 0 | 0 | 0 | 0 | 0 | 0 | 0 |
| 0 | 0 | 0 | 0 | 0 | 0 | 0 | 0 | 0 | 0 | 0 |
| 0 | 0 | 0 | 0 | 2 | 0 | 0 | 0 | 2 | 0 | 0 |
| 0 | 0 | 0 | 0 | 0 | 0 | 2 | 0 | 0 | 2 | 0 |
| 0 | 0 | 0 | 0 | 1 | 0 | 1 | 0 | 0 | 0 | 0 |
| 1 | 0 | 0 | 0 | 0 | 0 | 1 | 0 | 0 | 0 | 0 |
| 0 | 0 | 0 | 0 | 3 | 0 | 0 | 0 | 2 | 0 | 0 |
| 0 | 0 | 0 | 0 | 3 | 0 | 0 | 0 | 0 | 0 | 0 |
| 0 | 0 | 0 | 0 | 1 | 0 | 0 | 0 | 0 | 0 | 0 |
| 0 | 0 | 0 | 0 | 0 | 0 | 5 | 0 | 1 | 0 | 0 |
| 0 | 0 | 0 | 0 | 0 | 0 | 0 | 0 | 1 | 1 | 0 |
| 0 | 0 | 0 | 0 | 1 | 0 | 6 | 0 | 1 | 0 | 0 |
| 0 | 0 | 0 | 0 | 2 | 0 | 1 | 0 | 0 | 0 | 0 |
| 0 | 0 | 0 | 0 | 3 | 0 | 0 | 0 | 0 | 0 | 0 |

|   |   |   |   |   |   |   |   |   |   |   |
|---|---|---|---|---|---|---|---|---|---|---|
| 0 | 0 | 0 | 0 | 0 | 0 | 0 | 0 | 0 | 0 | 0 |
| 0 | 0 | 0 | 0 | 1 | 0 | 1 | 0 | 0 | 0 | 0 |
| 0 | 0 | 0 | 0 | 3 | 0 | 1 | 0 | 0 | 0 | 0 |
| 0 | 0 | 0 | 0 | 4 | 0 | 0 | 0 | 0 | 0 | 0 |
| 0 | 0 | 0 | 0 | 0 | 0 | 0 | 0 | 0 | 0 | 0 |
| 0 | 0 | 0 | 2 | 0 | 0 | 0 | 0 | 0 | 0 | 0 |
| 0 | 0 | 0 | 0 | 3 | 0 | 0 | 0 | 0 | 0 | 0 |
| 0 | 0 | 0 | 0 | 2 | 0 | 0 | 0 | 0 | 0 | 0 |
| 0 | 0 | 0 | 0 | 4 | 0 | 0 | 0 | 0 | 0 | 0 |
| 0 | 0 | 0 | 0 | 5 | 0 | 0 | 0 | 0 | 0 | 0 |
| 0 | 0 | 0 | 0 | 2 | 0 | 0 | 0 | 0 | 0 | 0 |
| 0 | 0 | 0 | 0 | 2 | 0 | 3 | 0 | 0 | 0 | 0 |
| 0 | 0 | 0 | 0 | 8 | 0 | 0 | 0 | 4 | 0 | 0 |
| 0 | 0 | 0 | 0 | 0 | 0 | 0 | 0 | 1 | 0 | 0 |
| 0 | 0 | 0 | 0 | 2 | 0 | 0 | 0 | 0 | 0 | 0 |
| 0 | 0 | 0 | 0 | 5 | 0 | 0 | 0 | 0 | 0 | 0 |
| 0 | 0 | 0 | 0 | 3 | 0 | 0 | 0 | 0 | 0 | 0 |
| 0 | 0 | 0 | 0 | 0 | 0 | 0 | 0 | 0 | 0 | 0 |
| 0 | 0 | 0 | 0 | 3 | 0 | 0 | 0 | 0 | 0 | 0 |
| 0 | 0 | 0 | 0 | 1 | 0 | 0 | 0 | 0 | 0 | 0 |
| 0 | 0 | 0 | 1 | 1 | 0 | 1 | 0 | 0 | 1 | 0 |
| 0 | 0 | 0 | 0 | 3 | 0 | 0 | 0 | 0 | 0 | 0 |
| 0 | 0 | 0 | 1 | 1 | 0 | 0 | 0 | 0 | 0 | 0 |
| 0 | 0 | 0 | 0 | 2 | 0 | 2 | 0 | 0 | 0 | 0 |
| 1 | 0 | 0 | 0 | 1 | 0 | 2 | 0 | 0 | 0 | 0 |
| 0 | 0 | 0 | 0 | 6 | 0 | 3 | 0 | 0 | 0 | 0 |
| 1 | 0 | 0 | 0 | 0 | 0 | 0 | 0 | 0 | 0 | 0 |
| 0 | 0 | 0 | 1 | 0 | 0 | 0 | 0 | 0 | 0 | 0 |
| 0 | 0 | 0 | 1 | 0 | 0 | 0 | 0 | 0 | 0 | 0 |



|   |   |   |   |    |   |   |   |   |    |   |
|---|---|---|---|----|---|---|---|---|----|---|
| 0 | 0 | 0 | 0 | 3  | 0 | 0 | 0 | 0 | 1  | 0 |
| 0 | 0 | 0 | 0 | 4  | 0 | 0 | 2 | 0 | 1  | 0 |
| 0 | 0 | 1 | 1 | 1  | 0 | 0 | 0 | 1 | 0  | 0 |
| 1 | 0 | 0 | 3 | 2  | 0 | 0 | 0 | 0 | 1  | 0 |
| 0 | 0 | 0 | 0 | 5  | 0 | 0 | 0 | 0 | 4  | 0 |
| 0 | 0 | 0 | 0 | 0  | 0 | 0 | 0 | 0 | 6  | 0 |
| 0 | 0 | 0 | 0 | 1  | 0 | 0 | 0 | 0 | 9  | 0 |
| 0 | 0 | 0 | 0 | 0  | 0 | 0 | 3 | 1 | 12 | 0 |
| 0 | 0 | 0 | 0 | 4  | 0 | 0 | 2 | 0 | 1  | 0 |
| 0 | 0 | 0 | 0 | 3  | 0 | 0 | 1 | 0 | 1  | 0 |
| 0 | 0 | 0 | 0 | 4  | 0 | 0 | 0 | 0 | 2  | 0 |
| 1 | 0 | 0 | 2 | 1  | 0 | 0 | 0 | 0 | 0  | 0 |
| 0 | 0 | 0 | 0 | 0  | 0 | 0 | 0 | 3 | 3  | 0 |
| 0 | 0 | 0 | 0 | 6  | 0 | 0 | 1 | 0 | 0  | 0 |
| 0 | 0 | 0 | 1 | 2  | 0 | 0 | 2 | 0 | 0  | 0 |
| 0 | 0 | 0 | 0 | 7  | 0 | 0 | 0 | 0 | 10 | 0 |
| 0 | 0 | 0 | 0 | 22 | 0 | 0 | 0 | 0 | 9  | 0 |
| 0 | 0 | 0 | 0 | 1  | 0 | 0 | 0 | 0 | 13 | 0 |
| 0 | 0 | 0 | 3 | 0  | 0 | 0 | 0 | 0 | 0  | 0 |
| 0 | 0 | 0 | 3 | 3  | 0 | 0 | 0 | 0 | 0  | 0 |
| 0 | 0 | 0 | 0 | 1  | 0 | 0 | 0 | 0 | 0  | 0 |
| 0 | 0 | 0 | 0 | 12 | 0 | 0 | 0 | 0 | 9  | 0 |
| 0 | 0 | 0 | 0 | 0  | 0 | 0 | 0 | 0 | 0  | 0 |
| 0 | 0 | 1 | 2 | 4  | 0 | 0 | 0 | 0 | 0  | 0 |
| 0 | 0 | 0 | 2 | 1  | 0 | 0 | 0 | 0 | 0  | 0 |
| 0 | 0 | 1 | 0 | 2  | 0 | 0 | 0 | 0 | 2  | 0 |
| 0 | 0 | 1 | 0 | 2  | 0 | 0 | 0 | 0 | 0  | 0 |
| 0 | 0 | 0 | 0 | 2  | 0 | 0 | 0 | 0 | 2  | 0 |
| 0 | 0 | 0 | 0 | 4  | 0 | 0 | 0 | 0 | 5  | 0 |



|   |   |   |   |    |   |   |   |   |    |   |
|---|---|---|---|----|---|---|---|---|----|---|
| 1 | 0 | 0 | 1 | 6  | 0 | 0 | 0 | 1 | 3  | 0 |
| 0 | 0 | 0 | 0 | 16 | 0 | 0 | 0 | 0 | 10 | 0 |
| 0 | 0 | 0 | 0 | 0  | 0 | 0 | 0 | 0 | 4  | 0 |
| 0 | 0 | 4 | 0 | 9  | 0 | 0 | 0 | 0 | 17 | 0 |
| 0 | 0 | 2 | 0 | 21 | 0 | 0 | 0 | 0 | 15 | 0 |
| 0 | 0 | 1 | 0 | 7  | 0 | 0 | 0 | 0 | 2  | 0 |
| 0 | 0 | 0 | 0 | 14 | 0 | 0 | 0 | 0 | 14 | 0 |
| 0 | 0 | 0 | 3 | 4  | 0 | 0 | 0 | 0 | 8  | 0 |
| 0 | 0 | 0 | 0 | 6  | 0 | 0 | 0 | 0 | 8  | 0 |
| 0 | 0 | 0 | 1 | 8  | 0 | 0 | 0 | 0 | 5  | 0 |
| 0 | 0 | 0 | 0 | 6  | 0 | 0 | 0 | 0 | 0  | 0 |
| 0 | 0 | 0 | 0 | 1  | 0 | 0 | 0 | 0 | 0  | 0 |
| 2 | 0 | 0 | 0 | 0  | 0 | 0 | 0 | 0 | 5  | 0 |
| 0 | 0 | 0 | 0 | 2  | 0 | 0 | 0 | 0 | 3  | 0 |
| 1 | 0 | 0 | 0 | 5  | 0 | 2 | 0 | 0 | 6  | 0 |
| 0 | 0 | 0 | 0 | 7  | 0 | 0 | 0 | 0 | 2  | 0 |
| 0 | 0 | 0 | 0 | 6  | 0 | 0 | 0 | 0 | 12 | 0 |
| 0 | 0 | 0 | 0 | 2  | 0 | 0 | 0 | 0 | 8  | 0 |
| 0 | 0 | 0 | 0 | 3  | 0 | 0 | 0 | 0 | 2  | 0 |
| 0 | 0 | 0 | 1 | 7  | 0 | 0 | 0 | 0 | 0  | 0 |
| 0 | 0 | 0 | 0 | 5  | 0 | 0 | 0 | 0 | 5  | 0 |
| 2 | 0 | 0 | 0 | 2  | 0 | 0 | 0 | 0 | 4  | 0 |
| 0 | 0 | 0 | 1 | 0  | 0 | 0 | 0 | 0 | 0  | 0 |
| 0 | 0 | 0 | 0 | 4  | 0 | 0 | 0 | 0 | 5  | 0 |
| 1 | 0 | 0 | 1 | 5  | 0 | 0 | 0 | 0 | 9  | 0 |
| 1 | 0 | 0 | 0 | 5  | 0 | 0 | 0 | 0 | 5  | 0 |
| 0 | 0 | 0 | 0 | 3  | 0 | 0 | 0 | 0 | 6  | 0 |
| 0 | 0 | 0 | 3 | 5  | 0 | 0 | 0 | 0 | 4  | 0 |
| 0 | 0 | 0 | 2 | 3  | 0 | 0 | 0 | 0 | 5  | 0 |

|   |   |   |   |   |   |   |   |   |   |   |   |
|---|---|---|---|---|---|---|---|---|---|---|---|
| 1 | 0 | 0 | 1 | 2 | 0 | 0 | 0 | 0 | 0 | 0 | 0 |
| 0 | 0 | 0 | 0 | 1 | 0 | 0 | 0 | 0 | 0 | 0 | 0 |
| 0 | 0 | 0 | 0 | 1 | 0 | 0 | 0 | 0 | 0 | 0 | 0 |
| 1 | 0 | 0 | 0 | 2 | 0 | 0 | 0 | 0 | 0 | 2 | 0 |
| 0 | 0 | 0 | 0 | 3 | 0 | 1 | 0 | 0 | 0 | 0 | 0 |
| 0 | 0 | 0 | 0 | 1 | 0 | 0 | 0 | 0 | 1 | 3 | 0 |
| 0 | 0 | 0 | 0 | 4 | 0 | 0 | 0 | 0 | 0 | 0 | 0 |
| 0 | 0 | 0 | 0 | 5 | 0 | 0 | 0 | 0 | 0 | 1 | 0 |
| 0 | 0 | 0 | 0 | 1 | 0 | 0 | 0 | 0 | 0 | 0 | 0 |
| 0 | 0 | 0 | 0 | 3 | 0 | 0 | 0 | 0 | 0 | 0 | 0 |
| 0 | 0 | 0 | 0 | 5 | 0 | 0 | 0 | 0 | 0 | 4 | 0 |
| 0 | 0 | 0 | 0 | 4 | 0 | 0 | 0 | 0 | 1 | 2 | 0 |
| 0 | 0 | 0 | 0 | 1 | 0 | 0 | 1 | 0 | 0 | 3 | 0 |
| 2 | 0 | 0 | 0 | 2 | 0 | 0 | 0 | 0 | 0 | 0 | 0 |
| 0 | 0 | 0 | 2 | 2 | 0 | 0 | 0 | 2 | 0 | 3 | 0 |
| 0 | 0 | 0 | 2 | 6 | 0 | 0 | 1 | 0 | 0 | 1 | 0 |
| 0 | 0 | 0 | 0 | 0 | 0 | 0 | 0 | 0 | 0 | 2 | 0 |
| 0 | 0 | 0 | 0 | 3 | 0 | 0 | 1 | 0 | 0 | 5 | 0 |
| 0 | 0 | 0 | 0 | 1 | 0 | 0 | 0 | 0 | 0 | 3 | 0 |
| 0 | 0 | 0 | 0 | 8 | 0 | 0 | 0 | 0 | 0 | 6 | 0 |
| 0 | 0 | 0 | 0 | 3 | 0 | 1 | 0 | 0 | 0 | 1 | 0 |
| 0 | 0 | 0 | 0 | 5 | 0 | 0 | 0 | 0 | 0 | 0 | 0 |
| 0 | 0 | 0 | 0 | 3 | 0 | 0 | 0 | 0 | 0 | 0 | 0 |
| 0 | 0 | 0 | 0 | 0 | 0 | 0 | 0 | 0 | 1 | 0 | 0 |
| 0 | 0 | 0 | 0 | 3 | 0 | 0 | 0 | 0 | 0 | 0 | 0 |
| 0 | 0 | 0 | 0 | 0 | 0 | 0 | 0 | 0 | 0 | 0 | 0 |
| 0 | 0 | 0 | 0 | 0 | 0 | 0 | 0 | 0 | 0 | 0 | 0 |
| 0 | 0 | 0 | 0 | 0 | 0 | 0 | 0 | 0 | 0 | 0 | 0 |
| 0 | 0 | 0 | 0 | 2 | 0 | 0 | 0 | 0 | 0 | 0 | 0 |
| 0 | 0 | 0 | 0 | 2 | 0 | 0 | 0 | 0 | 0 | 0 | 0 |



|   |   |   |   |   |   |   |   |   |   |   |
|---|---|---|---|---|---|---|---|---|---|---|
| 0 | 0 | 0 | 0 | 1 | 0 | 1 | 0 | 0 | 0 | 0 |
| 0 | 0 | 0 | 0 | 0 | 0 | 0 | 0 | 0 | 0 | 0 |
| 0 | 0 | 0 | 0 | 1 | 0 | 0 | 0 | 0 | 0 | 0 |
| 0 | 0 | 0 | 0 | 1 | 0 | 0 | 0 | 0 | 0 | 0 |
| 0 | 0 | 0 | 1 | 0 | 0 | 0 | 0 | 0 | 0 | 0 |
| 0 | 0 | 0 | 0 | 2 | 0 | 0 | 0 | 0 | 0 | 0 |
| 0 | 0 | 0 | 0 | 2 | 0 | 0 | 0 | 0 | 0 | 0 |
| 0 | 0 | 0 | 0 | 2 | 0 | 0 | 0 | 0 | 0 | 0 |
| 0 | 0 | 0 | 0 | 1 | 0 | 0 | 0 | 0 | 0 | 0 |
| 0 | 0 | 0 | 0 | 1 | 0 | 0 | 0 | 0 | 0 | 0 |
| 0 | 0 | 0 | 0 | 1 | 0 | 1 | 0 | 0 | 0 | 0 |
| 0 | 0 | 0 | 1 | 2 | 0 | 0 | 0 | 0 | 0 | 0 |
| 0 | 0 | 0 | 0 | 5 | 0 | 0 | 0 | 0 | 0 | 0 |
| 0 | 0 | 0 | 0 | 2 | 0 | 1 | 0 | 0 | 0 | 0 |
| 0 | 0 | 0 | 0 | 2 | 0 | 1 | 0 | 0 | 0 | 0 |
| 0 | 0 | 0 | 0 | 3 | 0 | 0 | 0 | 0 | 0 | 0 |
| 1 | 0 | 0 | 0 | 4 | 0 | 0 | 0 | 0 | 0 | 0 |
| 0 | 0 | 0 | 0 | 1 | 0 | 0 | 0 | 0 | 0 | 0 |
| 0 | 0 | 0 | 0 | 0 | 0 | 0 | 0 | 0 | 0 | 0 |
| 0 | 0 | 0 | 1 | 4 | 0 | 1 | 1 | 1 | 0 | 0 |
| 0 | 0 | 0 | 0 | 0 | 0 | 0 | 0 | 0 | 0 | 0 |
| 0 | 0 | 0 | 0 | 2 | 0 | 1 | 0 | 0 | 0 | 0 |
| 0 | 0 | 0 | 0 | 5 | 0 | 0 | 0 | 0 | 0 | 0 |

|        |        |        |        |        |        |        |        |        |        |        |
|--------|--------|--------|--------|--------|--------|--------|--------|--------|--------|--------|
| nemert | nicaes | notomi | notsca | nuchar | olithi | ophang | orbpap | owepet | paguri | papaus |
| 2      | 0      | 0      | 0      | 0      | 0      | 0      | 0      | 1      | 0      | 0      |
| 4      | 0      | 0      | 0      | 0      | 0      | 0      | 0      | 0      | 0      | 0      |
| 1      | 0      | 0      | 0      | 0      | 0      | 0      | 0      | 0      | 0      | 0      |
| 1      | 0      | 0      | 0      | 0      | 0      | 1      | 0      | 1      | 0      | 0      |



|   |   |   |    |    |   |   |   |   |   |   |
|---|---|---|----|----|---|---|---|---|---|---|
| 0 | 0 | 0 | 4  | 0  | 0 | 0 | 0 | 1 | 0 | 0 |
| 0 | 0 | 0 | 1  | 0  | 0 | 0 | 0 | 0 | 0 | 0 |
| 2 | 1 | 0 | 1  | 0  | 0 | 0 | 0 | 0 | 0 | 0 |
| 0 | 1 | 0 | 4  | 0  | 1 | 0 | 0 | 0 | 0 | 0 |
| 1 | 0 | 0 | 1  | 0  | 1 | 0 | 0 | 0 | 0 | 0 |
| 1 | 0 | 0 | 5  | 2  | 0 | 0 | 0 | 0 | 0 | 0 |
| 1 | 1 | 0 | 6  | 12 | 0 | 0 | 0 | 0 | 0 | 0 |
| 3 | 1 | 0 | 11 | 3  | 0 | 0 | 0 | 1 | 0 | 0 |
| 0 | 0 | 0 | 6  | 1  | 0 | 0 | 0 | 0 | 0 | 0 |
| 4 | 0 | 0 | 9  | 7  | 0 | 0 | 0 | 0 | 0 | 0 |
| 0 | 0 | 0 | 1  | 1  | 0 | 0 | 0 | 0 | 0 | 0 |
| 0 | 1 | 0 | 2  | 21 | 0 | 0 | 0 | 0 | 0 | 0 |
| 0 | 2 | 0 | 4  | 9  | 0 | 0 | 0 | 0 | 0 | 0 |
| 3 | 1 | 0 | 2  | 13 | 0 | 0 | 0 | 0 | 0 | 0 |
| 0 | 0 | 0 | 10 | 13 | 0 | 0 | 0 | 2 | 0 | 0 |
| 0 | 0 | 0 | 3  | 0  | 0 | 0 | 0 | 0 | 0 | 0 |
| 0 | 0 | 0 | 4  | 10 | 0 | 0 | 0 | 0 | 0 | 0 |
| 0 | 0 | 0 | 1  | 13 | 0 | 0 | 0 | 0 | 0 | 0 |
| 1 | 2 | 0 | 1  | 3  | 0 | 0 | 0 | 0 | 0 | 0 |
| 1 | 0 | 0 | 3  | 4  | 0 | 0 | 0 | 1 | 0 | 0 |
| 0 | 2 | 0 | 1  | 5  | 0 | 0 | 0 | 1 | 0 | 0 |
| 1 | 0 | 0 | 11 | 5  | 0 | 0 | 0 | 0 | 0 | 0 |
| 0 | 0 | 0 | 1  | 3  | 0 | 0 | 0 | 0 | 0 | 0 |
| 0 | 0 | 0 | 2  | 3  | 0 | 0 | 0 | 0 | 0 | 0 |
| 2 | 1 | 0 | 15 | 4  | 0 | 0 | 0 | 1 | 0 | 0 |
| 0 | 1 | 0 | 0  | 1  | 0 | 0 | 0 | 1 | 0 | 0 |
| 0 | 0 | 0 | 0  | 1  | 0 | 0 | 0 | 0 | 0 | 0 |
| 1 | 0 | 0 | 2  | 0  | 0 | 0 | 0 | 0 | 0 | 0 |
| 0 | 1 | 0 | 0  | 6  | 0 | 0 | 0 | 1 | 0 | 0 |

|   |   |   |   |    |   |   |   |   |   |   |
|---|---|---|---|----|---|---|---|---|---|---|
| 0 | 2 | 0 | 0 | 4  | 0 | 0 | 0 | 0 | 0 | 0 |
| 0 | 0 | 0 | 4 | 8  | 0 | 0 | 0 | 0 | 0 | 0 |
| 2 | 2 | 0 | 0 | 0  | 1 | 0 | 0 | 0 | 0 | 0 |
| 1 | 1 | 0 | 0 | 0  | 0 | 0 | 0 | 0 | 0 | 1 |
| 1 | 1 | 0 | 0 | 0  | 0 | 0 | 0 | 0 | 0 | 0 |
| 1 | 2 | 0 | 0 | 0  | 0 | 0 | 0 | 0 | 0 | 0 |
| 0 | 2 | 0 | 0 | 2  | 0 | 0 | 0 | 2 | 0 | 0 |
| 1 | 1 | 0 | 0 | 1  | 0 | 0 | 0 | 1 | 0 | 0 |
| 2 | 1 | 0 | 0 | 1  | 0 | 0 | 0 | 0 | 0 | 0 |
| 1 | 0 | 0 | 8 | 21 | 0 | 0 | 0 | 2 | 0 | 0 |
| 1 | 2 | 0 | 0 | 2  | 0 | 0 | 0 | 0 | 0 | 0 |
| 1 | 2 | 0 | 2 | 1  | 0 | 0 | 0 | 0 | 0 | 0 |
| 4 | 2 | 0 | 0 | 0  | 0 | 0 | 0 | 0 | 0 | 0 |
| 1 | 0 | 0 | 1 | 2  | 0 | 0 | 0 | 1 | 0 | 0 |
| 1 | 0 | 0 | 0 | 2  | 0 | 0 | 0 | 0 | 0 | 0 |
| 2 | 2 | 0 | 0 | 1  | 0 | 0 | 0 | 0 | 0 | 0 |
| 0 | 0 | 0 | 1 | 14 | 0 | 0 | 0 | 1 | 0 | 0 |
| 1 | 0 | 0 | 0 | 8  | 0 | 0 | 0 | 1 | 0 | 0 |
| 2 | 1 | 0 | 5 | 25 | 0 | 0 | 0 | 1 | 0 | 0 |
| 0 | 0 | 0 | 0 | 12 | 0 | 0 | 0 | 0 | 0 | 0 |
| 0 | 0 | 0 | 6 | 28 | 0 | 0 | 0 | 0 | 0 | 0 |
| 2 | 1 | 0 | 2 | 6  | 0 | 0 | 0 | 0 | 0 | 0 |
| 1 | 0 | 0 | 7 | 46 | 0 | 0 | 0 | 1 | 0 | 0 |
| 2 | 0 | 0 | 5 | 47 | 0 | 0 | 0 | 2 | 0 | 0 |
| 1 | 0 | 0 | 4 | 35 | 0 | 0 | 0 | 1 | 0 | 0 |
| 0 | 0 | 0 | 4 | 24 | 0 | 0 | 0 | 3 | 0 | 0 |
| 0 | 3 | 0 | 0 | 11 | 0 | 0 | 0 | 0 | 0 | 0 |
| 2 | 0 | 0 | 2 | 33 | 0 | 0 | 0 | 1 | 0 | 0 |
| 3 | 0 | 0 | 1 | 26 | 0 | 0 | 0 | 1 | 0 | 0 |

|   |   |   |   |    |   |   |   |   |   |   |   |
|---|---|---|---|----|---|---|---|---|---|---|---|
| 0 | 3 | 0 | 0 | 0  | 0 | 0 | 0 | 0 | 0 | 0 | 0 |
| 1 | 0 | 0 | 1 | 19 | 0 | 0 | 0 | 0 | 0 | 0 | 0 |
| 0 | 1 | 0 | 1 | 10 | 0 | 0 | 0 | 0 | 0 | 0 | 0 |
| 0 | 2 | 0 | 0 | 14 | 0 | 0 | 0 | 0 | 0 | 0 | 0 |
| 0 | 1 | 0 | 0 | 2  | 0 | 0 | 0 | 0 | 2 | 0 | 0 |
| 0 | 4 | 0 | 0 | 2  | 0 | 0 | 0 | 0 | 1 | 0 | 0 |
| 3 | 2 | 0 | 0 | 3  | 0 | 0 | 0 | 0 | 0 | 0 | 0 |
| 0 | 3 | 0 | 1 | 1  | 0 | 0 | 0 | 0 | 0 | 0 | 0 |
| 0 | 5 | 0 | 0 | 1  | 0 | 0 | 0 | 0 | 0 | 0 | 0 |
| 0 | 0 | 0 | 0 | 2  | 0 | 0 | 0 | 0 | 1 | 0 | 0 |
| 0 | 0 | 0 | 0 | 1  | 0 | 0 | 0 | 0 | 1 | 0 | 0 |
| 0 | 2 | 0 | 0 | 5  | 0 | 0 | 0 | 0 | 0 | 0 | 0 |
| 3 | 0 | 0 | 0 | 1  | 0 | 0 | 0 | 0 | 1 | 0 | 0 |
| 0 | 1 | 0 | 0 | 8  | 0 | 0 | 0 | 0 | 1 | 1 | 0 |
| 0 | 1 | 0 | 0 | 3  | 0 | 0 | 0 | 0 | 2 | 0 | 0 |
| 0 | 3 | 0 | 0 | 6  | 0 | 0 | 0 | 0 | 2 | 0 | 0 |
| 0 | 0 | 0 | 0 | 1  | 0 | 0 | 0 | 0 | 1 | 0 | 0 |
| 3 | 1 | 0 | 0 | 5  | 0 | 0 | 0 | 0 | 1 | 0 | 0 |
| 3 | 3 | 0 | 0 | 4  | 0 | 0 | 0 | 0 | 2 | 0 | 0 |
| 1 | 0 | 0 | 0 | 3  | 0 | 0 | 0 | 0 | 3 | 0 | 0 |
| 1 | 3 | 0 | 0 | 8  | 0 | 0 | 0 | 0 | 2 | 0 | 0 |
| 2 | 1 | 0 | 0 | 5  | 0 | 0 | 0 | 0 | 1 | 0 | 0 |
| 1 | 4 | 0 | 0 | 0  | 2 | 0 | 0 | 0 | 1 | 0 | 0 |
| 0 | 1 | 0 | 1 | 6  | 0 | 0 | 0 | 0 | 0 | 0 | 0 |
| 1 | 4 | 0 | 0 | 6  | 0 | 0 | 0 | 0 | 0 | 0 | 0 |
| 2 | 1 | 0 | 0 | 7  | 0 | 0 | 0 | 0 | 1 | 0 | 0 |
| 2 | 1 | 0 | 0 | 4  | 0 | 0 | 0 | 0 | 1 | 0 | 0 |
| 1 | 2 | 0 | 0 | 0  | 0 | 0 | 0 | 0 | 0 | 0 | 0 |
| 3 | 0 | 0 | 0 | 14 | 0 | 0 | 0 | 0 | 2 | 0 | 0 |



|   |   |   |   |    |   |   |   |   |   |   |
|---|---|---|---|----|---|---|---|---|---|---|
| 1 | 2 | 0 | 0 | 3  | 0 | 0 | 0 | 3 | 0 | 0 |
| 2 | 0 | 0 | 2 | 30 | 0 | 0 | 0 | 3 | 0 | 0 |
| 1 | 2 | 0 | 0 | 3  | 0 | 0 | 0 | 2 | 0 | 0 |
| 2 | 4 | 0 | 0 | 4  | 0 | 0 | 0 | 1 | 0 | 0 |
| 3 | 1 | 0 | 0 | 3  | 0 | 0 | 0 | 1 | 0 | 0 |
| 3 | 6 | 0 | 0 | 1  | 0 | 0 | 0 | 0 | 0 | 0 |
| 2 | 3 | 0 | 0 | 3  | 0 | 0 | 0 | 1 | 0 | 0 |
| 0 | 3 | 0 | 0 | 4  | 0 | 0 | 0 | 0 | 0 | 0 |
| 1 | 1 | 0 | 0 | 2  | 0 | 0 | 0 | 0 | 0 | 0 |
| 1 | 0 | 0 | 0 | 22 | 0 | 0 | 0 | 0 | 0 | 0 |
| 2 | 1 | 0 | 3 | 19 | 0 | 0 | 0 | 0 | 0 | 0 |
| 1 | 0 | 0 | 1 | 40 | 0 | 0 | 0 | 1 | 0 | 0 |
| 1 | 0 | 0 | 1 | 35 | 0 | 0 | 0 | 1 | 0 | 0 |
| 4 | 1 | 0 | 1 | 26 | 0 | 0 | 0 | 3 | 0 | 0 |
| 3 | 0 | 0 | 1 | 44 | 0 | 0 | 0 | 0 | 0 | 0 |
| 1 | 0 | 0 | 1 | 8  | 1 | 0 | 0 | 1 | 0 | 0 |
| 1 | 1 | 0 | 2 | 21 | 0 | 0 | 0 | 1 | 0 | 0 |
| 0 | 3 | 1 | 1 | 22 | 0 | 0 | 0 | 0 | 0 | 0 |
| 4 | 0 | 0 | 0 | 38 | 1 | 0 | 0 | 0 | 0 | 0 |
| 1 | 0 | 0 | 0 | 34 | 0 | 0 | 0 | 1 | 0 | 0 |
| 0 | 0 | 0 | 7 | 21 | 0 | 0 | 0 | 0 | 0 | 0 |
| 1 | 0 | 0 | 3 | 1  | 0 | 0 | 0 | 3 | 0 | 0 |
| 1 | 0 | 0 | 8 | 21 | 1 | 0 | 0 | 0 | 0 | 0 |
| 3 | 0 | 0 | 8 | 38 | 0 | 0 | 0 | 0 | 0 | 0 |
| 2 | 0 | 0 | 8 | 84 | 0 | 0 | 0 | 2 | 0 | 0 |
| 0 | 0 | 0 | 6 | 65 | 0 | 0 | 0 | 1 | 0 | 0 |
| 2 | 0 | 0 | 6 | 71 | 0 | 0 | 0 | 1 | 1 | 0 |
| 6 | 0 | 0 | 4 | 28 | 0 | 0 | 0 | 0 | 0 | 0 |
| 0 | 0 | 0 | 6 | 42 | 0 | 0 | 0 | 1 | 0 | 0 |

|   |   |   |    |    |   |   |   |   |   |   |
|---|---|---|----|----|---|---|---|---|---|---|
| 0 | 0 | 0 | 1  | 0  | 0 | 0 | 0 | 0 | 0 | 0 |
| 0 | 0 | 0 | 4  | 4  | 0 | 0 | 0 | 2 | 0 | 0 |
| 0 | 1 | 0 | 3  | 0  | 0 | 0 | 0 | 1 | 0 | 0 |
| 0 | 0 | 0 | 5  | 25 | 0 | 0 | 0 | 0 | 0 | 0 |
| 0 | 0 | 0 | 7  | 37 | 0 | 0 | 0 | 2 | 0 | 0 |
| 0 | 0 | 0 | 2  | 8  | 0 | 0 | 0 | 0 | 0 | 0 |
| 2 | 0 | 0 | 3  | 0  | 1 | 0 | 0 | 0 | 0 | 0 |
| 4 | 2 | 0 | 2  | 1  | 1 | 0 | 0 | 1 | 0 | 0 |
| 1 | 1 | 0 | 0  | 2  | 0 | 0 | 0 | 1 | 0 | 0 |
| 3 | 1 | 0 | 0  | 1  | 0 | 0 | 0 | 0 | 0 | 0 |
| 0 | 0 | 0 | 3  | 0  | 0 | 0 | 0 | 0 | 0 | 0 |
| 3 | 1 | 0 | 0  | 0  | 1 | 0 | 0 | 0 | 0 | 0 |
| 1 | 2 | 0 | 2  | 2  | 0 | 0 | 0 | 0 | 0 | 0 |
| 1 | 2 | 0 | 0  | 0  | 0 | 0 | 0 | 0 | 0 | 0 |
| 0 | 0 | 0 | 8  | 1  | 2 | 0 | 0 | 0 | 0 | 0 |
| 1 | 1 | 0 | 0  | 0  | 0 | 0 | 0 | 0 | 0 | 0 |
| 1 | 0 | 0 | 8  | 50 | 1 | 0 | 0 | 0 | 0 | 0 |
| 0 | 1 | 0 | 6  | 5  | 0 | 0 | 0 | 1 | 0 | 0 |
| 0 | 0 | 0 | 12 | 40 | 0 | 0 | 0 | 1 | 0 | 0 |
| 1 | 0 | 0 | 11 | 9  | 1 | 0 | 0 | 0 | 0 | 0 |
| 2 | 0 | 0 | 3  | 0  | 0 | 0 | 0 | 1 | 0 | 0 |
| 0 | 1 | 0 | 1  | 0  | 0 | 0 | 0 | 0 | 0 | 0 |
| 1 | 0 | 0 | 0  | 0  | 1 | 0 | 0 | 1 | 0 | 0 |
| 2 | 0 | 0 | 10 | 0  | 0 | 0 | 0 | 1 | 0 | 0 |
| 2 | 0 | 0 | 2  | 0  | 0 | 0 | 0 | 0 | 0 | 0 |
| 2 | 1 | 0 | 0  | 0  | 0 | 0 | 0 | 0 | 0 | 0 |
| 0 | 0 | 0 | 5  | 2  | 0 | 0 | 0 | 1 | 0 | 0 |
| 1 | 0 | 0 | 4  | 6  | 0 | 0 | 0 | 0 | 0 | 0 |
| 3 | 0 | 0 | 2  | 3  | 0 | 0 | 0 | 0 | 0 | 0 |

|   |   |   |   |   |   |   |   |   |   |   |
|---|---|---|---|---|---|---|---|---|---|---|
| 0 | 0 | 0 | 1 | 0 | 2 | 0 | 0 | 0 | 0 | 0 |
| 3 | 0 | 0 | 0 | 0 | 0 | 0 | 0 | 0 | 0 | 0 |
| 0 | 1 | 0 | 0 | 0 | 0 | 0 | 0 | 0 | 0 | 0 |
| 1 | 2 | 0 | 2 | 0 | 0 | 0 | 0 | 0 | 0 | 0 |
| 1 | 0 | 0 | 0 | 0 | 0 | 0 | 0 | 0 | 0 | 0 |
| 0 | 0 | 0 | 0 | 0 | 0 | 0 | 0 | 0 | 0 | 0 |
| 1 | 0 | 0 | 0 | 1 | 0 | 0 | 0 | 0 | 0 | 0 |
| 1 | 2 | 0 | 5 | 0 | 0 | 0 | 0 | 0 | 0 | 0 |
| 2 | 0 | 0 | 1 | 0 | 0 | 0 | 0 | 0 | 0 | 0 |
| 0 | 0 | 0 | 4 | 0 | 0 | 0 | 0 | 0 | 0 | 0 |
| 0 | 0 | 0 | 5 | 0 | 0 | 0 | 0 | 0 | 0 | 0 |
| 0 | 0 | 0 | 4 | 0 | 0 | 0 | 0 | 0 | 0 | 0 |
| 1 | 1 | 0 | 7 | 0 | 1 | 0 | 0 | 0 | 0 | 0 |
| 0 | 2 | 0 | 1 | 0 | 0 | 0 | 0 | 0 | 0 | 0 |
| 0 | 0 | 0 | 3 | 0 | 0 | 0 | 0 | 0 | 0 | 0 |
| 0 | 0 | 0 | 1 | 0 | 0 | 0 | 0 | 0 | 0 | 0 |
| 0 | 0 | 0 | 3 | 0 | 0 | 0 | 1 | 0 | 0 | 0 |
| 2 | 2 | 0 | 0 | 0 | 0 | 0 | 0 | 0 | 0 | 0 |
| 0 | 1 | 0 | 2 | 0 | 0 | 0 | 0 | 0 | 0 | 0 |
| 1 | 0 | 0 | 1 | 0 | 0 | 0 | 0 | 0 | 0 | 0 |
| 0 | 0 | 0 | 0 | 0 | 0 | 0 | 0 | 0 | 0 | 0 |
| 0 | 0 | 0 | 1 | 0 | 0 | 0 | 0 | 0 | 0 | 0 |
| 0 | 0 | 0 | 3 | 0 | 0 | 0 | 0 | 0 | 0 | 0 |
| 1 | 0 | 0 | 1 | 0 | 0 | 0 | 0 | 0 | 0 | 0 |
| 4 | 0 | 0 | 3 | 0 | 1 | 0 | 0 | 0 | 0 | 0 |
| 2 | 0 | 0 | 1 | 0 | 0 | 0 | 0 | 0 | 0 | 0 |
| 2 | 0 | 0 | 4 | 0 | 0 | 0 | 0 | 0 | 0 | 0 |
| 1 | 0 | 0 | 0 | 0 | 0 | 0 | 0 | 0 | 0 | 0 |
| 0 | 1 | 0 | 6 | 0 | 0 | 0 | 0 | 0 | 0 | 0 |

|   |   |   |    |    |   |   |   |   |   |   |
|---|---|---|----|----|---|---|---|---|---|---|
| 0 | 0 | 0 | 1  | 0  | 0 | 0 | 0 | 0 | 0 | 0 |
| 1 | 0 | 0 | 1  | 0  | 0 | 0 | 0 | 0 | 0 | 0 |
| 0 | 2 | 0 | 1  | 0  | 0 | 0 | 0 | 0 | 0 | 0 |
| 1 | 0 | 0 | 4  | 0  | 1 | 0 | 0 | 0 | 0 | 0 |
| 0 | 0 | 0 | 0  | 1  | 0 | 0 | 0 | 0 | 0 | 0 |
| 2 | 0 | 0 | 2  | 0  | 1 | 0 | 0 | 0 | 0 | 0 |
| 2 | 0 | 0 | 0  | 0  | 1 | 0 | 0 | 0 | 0 | 0 |
| 3 | 1 | 0 | 4  | 0  | 0 | 0 | 0 | 0 | 0 | 0 |
| 2 | 0 | 0 | 9  | 0  | 1 | 0 | 0 | 0 | 0 | 0 |
| 1 | 1 | 0 | 2  | 0  | 0 | 0 | 0 | 0 | 0 | 0 |
| 4 | 0 | 0 | 0  | 0  | 0 | 0 | 0 | 0 | 0 | 0 |
| 0 | 0 | 0 | 12 | 4  | 0 | 0 | 0 | 0 | 0 | 0 |
| 3 | 0 | 0 | 9  | 2  | 0 | 0 | 0 | 0 | 0 | 0 |
| 1 | 0 | 0 | 1  | 5  | 0 | 0 | 0 | 0 | 0 | 0 |
| 2 | 0 | 0 | 12 | 19 | 0 | 0 | 0 | 0 | 0 | 0 |
| 1 | 1 | 0 | 2  | 4  | 0 | 0 | 0 | 1 | 0 | 0 |
| 0 | 1 | 0 | 2  | 8  | 0 | 0 | 0 | 0 | 0 | 0 |
| 0 | 0 | 0 | 2  | 0  | 0 | 0 | 0 | 0 | 0 | 0 |
| 0 | 0 | 0 | 2  | 0  | 0 | 0 | 0 | 0 | 0 | 0 |
| 2 | 0 | 0 | 1  | 0  | 0 | 0 | 0 | 0 | 0 | 0 |
| 0 | 0 | 0 | 4  | 18 | 0 | 0 | 0 | 0 | 0 | 0 |
| 1 | 0 | 0 | 1  | 20 | 0 | 0 | 0 | 0 | 0 | 0 |
| 2 | 1 | 0 | 5  | 14 | 0 | 0 | 0 | 0 | 0 | 0 |
| 1 | 0 | 0 | 3  | 3  | 0 | 0 | 0 | 0 | 0 | 0 |
| 0 | 0 | 0 | 3  | 3  | 0 | 0 | 0 | 0 | 0 | 0 |
| 0 | 0 | 0 | 4  | 3  | 0 | 0 | 0 | 1 | 0 | 0 |
| 0 | 0 | 0 | 4  | 2  | 2 | 0 | 0 | 0 | 0 | 0 |
| 0 | 1 | 0 | 3  | 7  | 0 | 0 | 0 | 0 | 0 | 0 |
| 1 | 0 | 0 | 9  | 17 | 0 | 0 | 0 | 0 | 0 | 0 |

|   |   |   |    |    |   |   |   |   |   |   |
|---|---|---|----|----|---|---|---|---|---|---|
| 3 | 0 | 0 | 8  | 31 | 1 | 0 | 0 | 0 | 0 | 0 |
| 2 | 0 | 0 | 6  | 14 | 0 | 0 | 0 | 0 | 1 | 0 |
| 0 | 0 | 0 | 5  | 6  | 0 | 0 | 0 | 0 | 0 | 0 |
| 1 | 0 | 0 | 11 | 1  | 0 | 0 | 0 | 0 | 3 | 0 |
| 0 | 1 | 0 | 2  | 9  | 0 | 0 | 0 | 0 | 0 | 0 |
| 1 | 0 | 0 | 7  | 56 | 0 | 0 | 0 | 0 | 1 | 0 |
| 0 | 0 | 0 | 15 | 22 | 0 | 0 | 0 | 0 | 2 | 0 |
| 4 | 0 | 0 | 4  | 13 | 0 | 0 | 0 | 0 | 1 | 0 |
| 0 | 0 | 0 | 0  | 22 | 0 | 0 | 0 | 0 | 0 | 0 |
| 2 | 0 | 0 | 2  | 2  | 1 | 0 | 0 | 0 | 2 | 0 |
| 0 | 1 | 0 | 3  | 0  | 0 | 0 | 0 | 0 | 0 | 0 |
| 2 | 0 | 0 | 9  | 0  | 0 | 0 | 0 | 0 | 0 | 0 |
| 3 | 0 | 0 | 9  | 11 | 0 | 0 | 0 | 0 | 0 | 0 |
| 0 | 1 | 0 | 6  | 20 | 0 | 0 | 0 | 0 | 0 | 0 |
| 4 | 0 | 0 | 2  | 24 | 0 | 0 | 0 | 0 | 3 | 0 |
| 0 | 1 | 0 | 0  | 17 | 0 | 0 | 0 | 0 | 3 | 0 |
| 4 | 0 | 0 | 10 | 56 | 0 | 0 | 0 | 0 | 2 | 0 |
| 0 | 0 | 0 | 6  | 19 | 0 | 0 | 0 | 0 | 0 | 0 |
| 2 | 1 | 0 | 0  | 6  | 1 | 0 | 0 | 0 | 0 | 0 |
| 0 | 0 | 0 | 5  | 6  | 0 | 0 | 0 | 0 | 2 | 0 |
| 1 | 0 | 0 | 10 | 15 | 0 | 0 | 0 | 0 | 0 | 0 |
| 6 | 1 | 0 | 11 | 16 | 0 | 0 | 0 | 0 | 0 | 0 |
| 2 | 0 | 0 | 0  | 37 | 0 | 0 | 0 | 0 | 0 | 0 |
| 9 | 0 | 0 | 0  | 20 | 0 | 0 | 0 | 0 | 2 | 0 |
| 2 | 0 | 0 | 0  | 31 | 0 | 0 | 0 | 0 | 1 | 0 |
| 0 | 3 | 0 | 0  | 16 | 0 | 0 | 0 | 0 | 0 | 0 |
| 4 | 0 | 0 | 0  | 14 | 0 | 0 | 0 | 0 | 1 | 0 |
| 1 | 0 | 0 | 0  | 60 | 0 | 0 | 0 | 0 | 3 | 0 |
| 3 | 0 | 0 | 3  | 27 | 0 | 0 | 0 | 0 | 3 | 0 |

|   |   |   |   |    |   |   |   |    |   |   |   |
|---|---|---|---|----|---|---|---|----|---|---|---|
| 1 | 0 | 0 | 0 | 0  | 0 | 0 | 0 | 0  | 0 | 0 | 0 |
| 6 | 0 | 0 | 0 | 63 | 2 | 0 | 0 | 3  | 0 | 0 | 0 |
| 1 | 0 | 0 | 0 | 27 | 0 | 0 | 0 | 4  | 0 | 0 | 0 |
| 0 | 4 | 0 | 0 | 7  | 0 | 0 | 0 | 1  | 0 | 0 | 0 |
| 0 | 3 | 0 | 0 | 10 | 0 | 0 | 0 | 0  | 0 | 0 | 0 |
| 0 | 2 | 0 | 0 | 18 | 0 | 0 | 0 | 1  | 0 | 0 | 0 |
| 0 | 2 | 0 | 0 | 16 | 0 | 0 | 0 | 10 | 0 | 0 | 0 |
| 0 | 1 | 0 | 0 | 5  | 0 | 0 | 0 | 1  | 0 | 0 | 0 |
| 3 | 2 | 0 | 0 | 13 | 0 | 0 | 0 | 1  | 0 | 0 | 0 |
| 2 | 3 | 0 | 0 | 9  | 0 | 0 | 0 | 3  | 0 | 0 | 0 |
| 0 | 1 | 0 | 0 | 9  | 0 | 0 | 0 | 2  | 0 | 0 | 0 |
| 0 | 0 | 0 | 0 | 20 | 0 | 0 | 0 | 3  | 0 | 0 | 0 |
| 2 | 0 | 1 | 0 | 53 | 0 | 0 | 0 | 7  | 0 | 0 | 0 |
| 2 | 0 | 0 | 0 | 26 | 0 | 0 | 0 | 3  | 0 | 0 | 0 |
| 2 | 1 | 0 | 0 | 19 | 0 | 0 | 0 | 3  | 0 | 0 | 0 |
| 5 | 0 | 0 | 0 | 12 | 1 | 0 | 0 | 5  | 0 | 0 | 0 |
| 2 | 1 | 0 | 0 | 2  | 0 | 0 | 0 | 2  | 0 | 0 | 0 |
| 1 | 1 | 0 | 0 | 19 | 0 | 0 | 0 | 4  | 0 | 0 | 0 |
| 1 | 0 | 0 | 0 | 21 | 1 | 0 | 0 | 6  | 0 | 0 | 0 |
| 3 | 0 | 0 | 0 | 6  | 1 | 0 | 0 | 9  | 0 | 0 | 0 |
| 0 | 1 | 0 | 0 | 3  | 0 | 0 | 0 | 6  | 0 | 0 | 0 |
| 0 | 0 | 0 | 0 | 3  | 0 | 0 | 0 | 0  | 0 | 0 | 0 |
| 4 | 2 | 0 | 0 | 2  | 0 | 0 | 0 | 3  | 0 | 0 | 0 |
| 3 | 1 | 0 | 0 | 3  | 0 | 0 | 0 | 2  | 0 | 0 | 0 |
| 1 | 1 | 0 | 0 | 4  | 0 | 0 | 0 | 3  | 0 | 0 | 0 |
| 2 | 0 | 0 | 0 | 3  | 0 | 0 | 0 | 2  | 0 | 0 | 0 |
| 5 | 2 | 0 | 0 | 0  | 0 | 0 | 0 | 1  | 1 | 0 | 0 |
| 1 | 0 | 0 | 0 | 17 | 0 | 0 | 0 | 1  | 0 | 0 | 0 |
| 0 | 3 | 0 | 0 | 2  | 0 | 0 | 0 | 0  | 0 | 0 | 0 |

|   |   |   |   |    |   |   |   |   |   |   |   |
|---|---|---|---|----|---|---|---|---|---|---|---|
| 1 | 1 | 0 | 0 | 0  | 0 | 0 | 0 | 0 | 0 | 0 | 0 |
| 2 | 2 | 0 | 0 | 3  | 0 | 0 | 0 | 0 | 0 | 0 | 0 |
| 0 | 3 | 0 | 0 | 0  | 0 | 0 | 0 | 0 | 0 | 0 | 0 |
| 1 | 1 | 0 | 0 | 1  | 0 | 0 | 0 | 0 | 0 | 0 | 0 |
| 0 | 1 | 0 | 0 | 0  | 0 | 0 | 0 | 0 | 0 | 0 | 0 |
| 2 | 2 | 0 | 0 | 0  | 0 | 0 | 0 | 0 | 0 | 0 | 0 |
| 0 | 2 | 0 | 0 | 1  | 0 | 0 | 0 | 0 | 0 | 0 | 0 |
| 0 | 2 | 0 | 0 | 2  | 0 | 0 | 0 | 0 | 0 | 0 | 0 |
| 1 | 0 | 0 | 0 | 6  | 0 | 0 | 0 | 0 | 0 | 0 | 0 |
| 1 | 6 | 0 | 0 | 0  | 0 | 0 | 0 | 0 | 0 | 0 | 0 |
| 0 | 1 | 0 | 0 | 3  | 0 | 0 | 0 | 0 | 0 | 0 | 0 |
| 2 | 3 | 0 | 0 | 5  | 0 | 0 | 0 | 0 | 0 | 0 | 0 |
| 2 | 2 | 0 | 0 | 2  | 0 | 0 | 0 | 0 | 0 | 0 | 0 |
| 0 | 1 | 0 | 0 | 3  | 0 | 0 | 1 | 0 | 0 | 0 | 0 |
| 1 | 0 | 0 | 0 | 14 | 0 | 0 | 0 | 0 | 0 | 0 | 0 |
| 1 | 3 | 0 | 0 | 7  | 0 | 0 | 0 | 0 | 0 | 0 | 0 |
| 2 | 1 | 0 | 0 | 2  | 0 | 0 | 0 | 0 | 0 | 0 | 0 |
| 0 | 0 | 0 | 0 | 2  | 1 | 0 | 0 | 0 | 0 | 0 | 0 |
| 0 | 2 | 0 | 0 | 4  | 0 | 0 | 0 | 0 | 0 | 0 | 0 |
| 2 | 1 | 0 | 0 | 1  | 1 | 0 | 1 | 0 | 0 | 0 | 0 |
| 1 | 0 | 0 | 0 | 2  | 0 | 0 | 0 | 0 | 0 | 0 | 0 |
| 2 | 0 | 0 | 0 | 7  | 0 | 0 | 0 | 0 | 0 | 0 | 0 |
| 2 | 1 | 0 | 0 | 4  | 0 | 0 | 0 | 1 | 0 | 0 | 0 |
| 2 | 0 | 0 | 0 | 6  | 2 | 0 | 0 | 2 | 0 | 0 | 0 |
| 1 | 0 | 0 | 0 | 0  | 2 | 0 | 0 | 1 | 0 | 0 | 0 |
| 3 | 0 | 0 | 0 | 7  | 1 | 0 | 2 | 0 | 0 | 0 | 0 |
| 2 | 1 | 0 | 0 | 1  | 0 | 0 | 0 | 3 | 0 | 0 | 0 |
| 2 | 2 | 0 | 1 | 68 | 0 | 0 | 0 | 3 | 0 | 0 | 0 |
| 0 | 1 | 0 | 0 | 1  | 0 | 0 | 0 | 1 | 0 | 0 | 0 |

|   |   |   |   |    |   |   |   |   |   |   |
|---|---|---|---|----|---|---|---|---|---|---|
| 1 | 0 | 0 | 0 | 0  | 0 | 0 | 0 | 2 | 0 | 0 |
| 0 | 1 | 0 | 0 | 7  | 0 | 0 | 0 | 1 | 0 | 0 |
| 0 | 1 | 0 | 0 | 8  | 0 | 0 | 1 | 3 | 0 | 0 |
| 3 | 0 | 0 | 0 | 29 | 0 | 0 | 0 | 4 | 0 | 0 |
| 1 | 1 | 0 | 0 | 7  | 0 | 0 | 0 | 5 | 0 | 0 |
| 4 | 1 | 0 | 0 | 31 | 0 | 0 | 0 | 4 | 0 | 0 |
| 1 | 0 | 0 | 0 | 30 | 0 | 0 | 0 | 3 | 0 | 0 |
| 0 | 0 | 0 | 0 | 13 | 0 | 0 | 0 | 1 | 0 | 0 |
| 4 | 0 | 0 | 0 | 14 | 0 | 0 | 0 | 3 | 0 | 0 |
| 2 | 2 | 0 | 0 | 17 | 0 | 0 | 0 | 0 | 0 | 0 |
| 1 | 0 | 0 | 0 | 14 | 0 | 0 | 0 | 0 | 0 | 0 |
| 2 | 0 | 0 | 0 | 18 | 0 | 0 | 0 | 3 | 0 | 0 |
| 8 | 0 | 0 | 0 | 29 | 0 | 0 | 0 | 0 | 0 | 1 |
| 1 | 0 | 0 | 0 | 25 | 0 | 0 | 0 | 1 | 0 | 0 |
| 2 | 0 | 0 | 1 | 40 | 0 | 0 | 0 | 1 | 0 | 0 |
| 1 | 0 | 0 | 0 | 14 | 0 | 0 | 0 | 2 | 0 | 0 |
| 0 | 2 | 0 | 0 | 6  | 0 | 0 | 0 | 2 | 0 | 0 |
| 0 | 2 | 0 | 0 | 0  | 0 | 0 | 0 | 0 | 0 | 0 |
| 4 | 0 | 0 | 1 | 2  | 0 | 0 | 0 | 1 | 0 | 0 |
| 4 | 0 | 0 | 0 | 1  | 0 | 0 | 0 | 1 | 0 | 0 |
| 5 | 0 | 0 | 0 | 6  | 1 | 0 | 0 | 3 | 0 | 0 |
| 0 | 0 | 0 | 2 | 34 | 0 | 0 | 0 | 0 | 0 | 0 |
| 2 | 0 | 0 | 1 | 20 | 0 | 0 | 0 | 1 | 0 | 0 |
| 6 | 2 | 0 | 1 | 9  | 1 | 0 | 0 | 1 | 0 | 0 |
| 2 | 1 | 0 | 0 | 11 | 0 | 0 | 0 | 0 | 0 | 0 |
| 1 | 0 | 0 | 2 | 14 | 0 | 0 | 0 | 1 | 0 | 0 |
| 2 | 0 | 0 | 6 | 11 | 0 | 0 | 0 | 1 | 0 | 0 |
| 4 | 0 | 0 | 1 | 14 | 1 | 0 | 0 | 0 | 0 | 0 |
| 2 | 0 | 0 | 4 | 0  | 1 | 0 | 0 | 0 | 0 | 0 |





|   |   |   |   |   |   |   |   |   |   |   |   |
|---|---|---|---|---|---|---|---|---|---|---|---|
| 0 | 0 | 0 | 0 | 3 | 0 | 0 | 0 | 0 | 0 | 0 | 0 |
| 1 | 0 | 0 | 5 | 0 | 0 | 0 | 0 | 0 | 2 | 0 | 0 |
| 1 | 1 | 0 | 1 | 0 | 0 | 0 | 0 | 0 | 1 | 0 | 0 |
| 1 | 0 | 0 | 0 | 1 | 0 | 0 | 0 | 0 | 1 | 0 | 0 |
| 0 | 0 | 0 | 1 | 7 | 0 | 0 | 0 | 0 | 0 | 0 | 0 |
| 0 | 0 | 0 | 2 | 1 | 0 | 0 | 0 | 0 | 0 | 0 | 0 |
| 0 | 0 | 0 | 1 | 1 | 0 | 0 | 0 | 0 | 0 | 0 | 0 |
| 1 | 0 | 0 | 0 | 1 | 0 | 0 | 0 | 0 | 0 | 0 | 0 |
| 1 | 0 | 0 | 0 | 5 | 0 | 0 | 0 | 0 | 0 | 0 | 0 |
| 1 | 5 | 0 | 0 | 4 | 3 | 0 | 0 | 0 | 0 | 0 | 0 |
| 2 | 0 | 0 | 1 | 0 | 0 | 0 | 0 | 0 | 0 | 0 | 0 |
| 0 | 0 | 0 | 2 | 2 | 0 | 0 | 0 | 0 | 0 | 0 | 0 |
| 1 | 1 | 0 | 0 | 0 | 0 | 0 | 0 | 0 | 0 | 0 | 0 |
| 0 | 0 | 0 | 2 | 0 | 0 | 0 | 0 | 0 | 0 | 0 | 0 |
| 0 | 0 | 0 | 9 | 6 | 0 | 0 | 0 | 0 | 0 | 0 | 0 |
| 0 | 2 | 0 | 1 | 0 | 0 | 0 | 0 | 0 | 0 | 0 | 0 |
| 0 | 0 | 0 | 1 | 1 | 0 | 0 | 0 | 0 | 0 | 0 | 0 |
| 0 | 0 | 0 | 5 | 0 | 0 | 0 | 0 | 0 | 0 | 0 | 0 |
| 2 | 1 | 0 | 0 | 0 | 0 | 0 | 0 | 0 | 0 | 0 | 0 |

| plaaus | polydo | priauc | psethi | scalib | scoben | scocyl | scolel | solpar | solsil | sphaer |
|--------|--------|--------|--------|--------|--------|--------|--------|--------|--------|--------|
| 0      | 0      | 16     | 0      | 0      | 0      | 8      | 0      | 0      | 0      | 0      |
| 0      | 0      | 24     | 0      | 0      | 1      | 17     | 0      | 0      | 0      | 0      |
| 0      | 0      | 43     | 0      | 0      | 1      | 18     | 0      | 0      | 0      | 0      |
| 0      | 0      | 34     | 0      | 0      | 0      | 15     | 0      | 0      | 0      | 0      |
| 0      | 0      | 26     | 0      | 0      | 0      | 8      | 0      | 0      | 0      | 0      |
| 0      | 0      | 50     | 0      | 0      | 1      | 0      | 0      | 0      | 0      | 0      |
| 0      | 0      | 34     | 0      | 0      | 2      | 9      | 0      | 0      | 0      | 0      |
| 0      | 0      | 41     | 0      | 0      | 2      | 3      | 0      | 0      | 0      | 0      |

|   |   |    |   |   |   |    |   |   |   |   |
|---|---|----|---|---|---|----|---|---|---|---|
| 0 | 0 | 19 | 0 | 0 | 5 | 11 | 0 | 0 | 0 | 0 |
| 0 | 0 | 23 | 0 | 0 | 0 | 9  | 0 | 0 | 0 | 0 |
| 0 | 0 | 16 | 0 | 0 | 0 | 1  | 0 | 0 | 0 | 0 |
| 0 | 0 | 9  | 0 | 0 | 1 | 2  | 0 | 0 | 0 | 0 |
| 0 | 0 | 26 | 0 | 0 | 1 | 0  | 0 | 0 | 0 | 0 |
| 0 | 0 | 11 | 0 | 0 | 1 | 1  | 0 | 0 | 0 | 0 |
| 1 | 0 | 26 | 0 | 0 | 1 | 0  | 0 | 0 | 0 | 0 |
| 0 | 0 | 33 | 0 | 0 | 0 | 0  | 0 | 0 | 0 | 0 |
| 0 | 0 | 13 | 0 | 0 | 1 | 0  | 0 | 0 | 0 | 0 |
| 0 | 0 | 9  | 0 | 0 | 0 | 1  | 0 | 0 | 0 | 0 |
| 0 | 0 | 24 | 0 | 0 | 0 | 1  | 0 | 0 | 0 | 0 |
| 0 | 0 | 10 | 0 | 0 | 1 | 0  | 0 | 0 | 0 | 1 |
| 0 | 0 | 16 | 0 | 0 | 1 | 11 | 0 | 0 | 0 | 0 |
| 0 | 0 | 22 | 0 | 0 | 0 | 5  | 0 | 0 | 0 | 0 |
| 0 | 0 | 18 | 0 | 0 | 0 | 9  | 0 | 0 | 0 | 0 |
| 0 | 0 | 20 | 0 | 0 | 2 | 11 | 0 | 0 | 0 | 0 |
| 0 | 0 | 20 | 0 | 0 | 1 | 12 | 0 | 0 | 0 | 0 |
| 0 | 0 | 6  | 0 | 0 | 1 | 1  | 0 | 0 | 0 | 0 |
| 0 | 0 | 20 | 0 | 0 | 0 | 15 | 0 | 0 | 0 | 0 |
| 0 | 0 | 28 | 0 | 0 | 1 | 10 | 0 | 0 | 0 | 0 |
| 0 | 0 | 17 | 0 | 0 | 1 | 8  | 0 | 0 | 0 | 0 |
| 0 | 0 | 20 | 0 | 0 | 1 | 7  | 0 | 0 | 0 | 0 |
| 0 | 0 | 16 | 0 | 0 | 0 | 8  | 0 | 0 | 0 | 0 |
| 0 | 0 | 27 | 0 | 0 | 2 | 5  | 6 | 0 | 0 | 0 |
| 0 | 0 | 14 | 0 | 0 | 2 | 6  | 0 | 0 | 0 | 0 |
| 0 | 0 | 12 | 0 | 0 | 2 | 4  | 0 | 0 | 0 | 0 |
| 0 | 0 | 5  | 1 | 0 | 0 | 5  | 1 | 0 | 0 | 0 |
| 0 | 0 | 36 | 0 | 0 | 0 | 18 | 0 | 0 | 0 | 0 |
| 0 | 0 | 33 | 0 | 0 | 1 | 12 | 0 | 0 | 0 | 0 |



|   |   |    |
|---|---|----|
| 0 | 0 | 2  |
| 0 | 0 | 2  |
| 0 | 0 | 7  |
| 1 | 0 | 7  |
| 0 | 0 | 23 |
| 0 | 0 | 22 |
| 0 | 0 | 13 |
| 0 | 0 | 20 |
| 0 | 0 | 19 |
| 0 | 0 | 15 |
| 0 | 0 | 16 |
| 0 | 0 | 18 |
| 0 | 0 | 3  |
| 0 | 0 | 10 |
| 0 | 0 | 15 |
| 0 | 0 | 3  |
| 0 | 0 | 20 |
| 0 | 0 | 18 |
| 1 | 0 | 18 |
| 0 | 0 | 9  |
| 0 | 0 | 11 |
| 0 | 0 | 3  |
| 0 | 0 | 26 |
| 0 | 0 | 10 |
| 0 | 0 | 4  |
| 0 | 0 | 11 |
| 0 | 0 | 37 |
| 0 | 0 | 34 |
| 0 | 0 | 46 |

|   |   |   |    |   |
|---|---|---|----|---|
| 0 | 0 | 1 | 2  | 0 |
| 0 | 0 | 0 | 2  | 1 |
| 0 | 1 | 1 | 2  | 1 |
| 0 | 0 | 1 | 5  | 0 |
| 0 | 0 | 0 | 5  | 0 |
| 0 | 0 | 1 | 9  | 0 |
| 0 | 0 | 1 | 2  | 0 |
| 0 | 0 | 1 | 2  | 0 |
| 0 | 0 | 1 | 5  | 0 |
| 0 | 0 | 0 | 4  | 0 |
| 0 | 0 | 1 | 10 | 0 |
| 0 | 0 | 2 | 6  | 0 |
| 0 | 0 | 3 | 9  | 0 |
| 0 | 0 | 2 | 4  | 0 |
| 0 | 0 | 1 | 10 | 1 |
| 0 | 0 | 0 | 12 | 0 |
| 0 | 0 | 1 | 7  | 0 |
| 0 | 0 | 0 | 8  | 1 |
| 0 | 0 | 0 | 5  | 0 |
| 0 | 0 | 1 | 2  | 0 |
| 0 | 0 | 3 | 10 | 0 |
| 0 | 0 | 1 | 5  | 0 |
| 0 | 0 | 0 | 0  | 0 |
| 0 | 0 | 1 | 11 | 0 |
| 0 | 0 | 1 | 3  | 0 |
| 0 | 0 | 0 | 1  | 0 |
| 0 | 0 | 0 | 6  | 0 |
| 0 | 0 | 0 | 6  | 0 |
| 0 | 0 | 1 | 6  | 0 |

|   |   |   |
|---|---|---|
| 0 | 0 | 0 |
| 0 | 0 | 0 |
| 0 | 0 | 0 |
| 0 | 0 | 0 |
| 0 | 0 | 0 |
| 0 | 0 | 0 |
| 0 | 0 | 0 |
| 0 | 0 | 0 |
| 0 | 0 | 0 |
| 0 | 0 | 0 |
| 0 | 0 | 0 |
| 0 | 0 | 0 |
| 0 | 0 | 0 |
| 0 | 0 | 0 |
| 0 | 0 | 0 |
| 0 | 0 | 0 |
| 0 | 0 | 0 |
| 0 | 0 | 0 |
| 0 | 0 | 0 |
| 0 | 0 | 0 |
| 0 | 0 | 0 |
| 0 | 0 | 0 |
| 0 | 1 | 0 |
| 0 | 0 | 0 |
| 0 | 0 | 0 |
| 0 | 0 | 0 |
| 0 | 0 | 0 |









|   |   |    |   |   |   |    |    |   |   |   |
|---|---|----|---|---|---|----|----|---|---|---|
| 0 | 0 | 32 | 0 | 0 | 2 | 9  | 0  | 0 | 0 | 0 |
| 0 | 0 | 18 | 0 | 0 | 2 | 10 | 0  | 0 | 0 | 0 |
| 0 | 0 | 11 | 0 | 0 | 1 | 19 | 0  | 0 | 0 | 0 |
| 0 | 0 | 10 | 0 | 0 | 1 | 10 | 0  | 0 | 0 | 0 |
| 0 | 0 | 32 | 0 | 0 | 0 | 16 | 0  | 0 | 0 | 0 |
| 0 | 0 | 22 | 0 | 0 | 2 | 12 | 0  | 0 | 0 | 0 |
| 0 | 0 | 0  | 0 | 0 | 0 | 4  | 0  | 0 | 0 | 0 |
| 0 | 0 | 8  | 0 | 0 | 0 | 1  | 0  | 0 | 0 | 0 |
| 0 | 0 | 20 | 0 | 0 | 0 | 10 | 0  | 0 | 0 | 0 |
| 0 | 0 | 13 | 0 | 0 | 0 | 11 | 0  | 0 | 0 | 0 |
| 0 | 0 | 18 | 0 | 0 | 0 | 20 | 0  | 0 | 0 | 0 |
| 0 | 0 | 15 | 0 | 0 | 0 | 3  | 0  | 0 | 0 | 0 |
| 0 | 0 | 10 | 0 | 0 | 3 | 9  | 0  | 0 | 0 | 0 |
| 0 | 0 | 17 | 0 | 0 | 1 | 5  | 0  | 0 | 0 | 0 |
| 0 | 0 | 26 | 0 | 0 | 2 | 10 | 0  | 0 | 0 | 0 |
| 0 | 0 | 15 | 0 | 0 | 0 | 0  | 1  | 0 | 0 | 0 |
| 0 | 0 | 8  | 0 | 0 | 0 | 10 | 0  | 0 | 0 | 0 |
| 0 | 0 | 15 | 0 | 0 | 3 | 13 | 1  | 0 | 0 | 0 |
| 0 | 0 | 3  | 0 | 0 | 0 | 3  | 0  | 0 | 0 | 0 |
| 0 | 0 | 1  | 0 | 0 | 0 | 5  | 0  | 0 | 0 | 0 |
| 0 | 0 | 19 | 0 | 0 | 0 | 9  | 0  | 0 | 0 | 0 |
| 0 | 0 | 41 | 0 | 0 | 1 | 3  | 0  | 0 | 0 | 0 |
| 0 | 0 | 6  | 0 | 0 | 0 | 6  | 0  | 0 | 0 | 0 |
| 0 | 0 | 22 | 0 | 0 | 1 | 7  | 0  | 0 | 0 | 0 |
| 0 | 0 | 39 | 0 | 0 | 2 | 2  | 0  | 0 | 0 | 0 |
| 0 | 0 | 26 | 0 | 0 | 1 | 0  | 0  | 0 | 0 | 0 |
| 0 | 0 | 1  | 0 | 0 | 1 | 0  | 6  | 0 | 0 | 0 |
| 0 | 0 | 0  | 0 | 0 | 0 | 5  | 3  | 0 | 0 | 0 |
| 0 | 0 | 4  | 0 | 0 | 0 | 2  | 16 | 0 | 0 | 0 |

|   |   |    |   |   |   |    |   |   |   |   |
|---|---|----|---|---|---|----|---|---|---|---|
| 0 | 0 | 10 | 0 | 0 | 1 | 11 | 0 | 0 | 0 | 0 |
| 0 | 0 | 8  | 0 | 0 | 0 | 4  | 5 | 0 | 0 | 0 |
| 0 | 0 | 9  | 0 | 0 | 1 | 3  | 0 | 0 | 0 | 0 |
| 0 | 0 | 25 | 0 | 0 | 1 | 0  | 0 | 0 | 0 | 0 |
| 0 | 0 | 28 | 0 | 0 | 0 | 0  | 0 | 0 | 0 | 0 |
| 0 | 0 | 23 | 0 | 0 | 1 | 2  | 0 | 0 | 0 | 0 |
| 0 | 0 | 23 | 0 | 0 | 0 | 0  | 0 | 0 | 0 | 0 |
| 0 | 0 | 16 | 0 | 0 | 1 | 1  | 0 | 0 | 0 | 0 |
| 0 | 0 | 38 | 0 | 0 | 1 | 1  | 0 | 0 | 0 | 0 |
| 0 | 0 | 9  | 0 | 0 | 2 | 5  | 0 | 0 | 0 | 0 |
| 0 | 0 | 21 | 0 | 0 | 1 | 0  | 0 | 0 | 0 | 0 |
| 0 | 0 | 4  | 0 | 0 | 1 | 3  | 0 | 0 | 0 | 0 |
| 0 | 0 | 8  | 0 | 0 | 1 | 2  | 0 | 0 | 0 | 0 |
| 0 | 0 | 19 | 0 | 0 | 0 | 1  | 0 | 0 | 0 | 0 |
| 0 | 0 | 12 | 0 | 0 | 0 | 7  | 0 | 0 | 0 | 0 |
| 0 | 0 | 19 | 0 | 0 | 0 | 0  | 0 | 0 | 0 | 0 |
| 0 | 0 | 17 | 0 | 0 | 0 | 0  | 0 | 0 | 0 | 0 |
| 0 | 0 | 0  | 0 | 0 | 0 | 4  | 0 | 0 | 0 | 0 |
| 0 | 0 | 8  | 0 | 0 | 2 | 7  | 0 | 0 | 0 | 0 |
| 0 | 0 | 8  | 0 | 0 | 0 | 4  | 0 | 0 | 0 | 0 |
| 0 | 0 | 21 | 0 | 0 | 0 | 0  | 0 | 0 | 0 | 0 |
| 0 | 0 | 27 | 0 | 0 | 1 | 15 | 0 | 0 | 0 | 0 |
| 0 | 0 | 29 | 0 | 0 | 0 | 9  | 0 | 0 | 0 | 0 |
| 0 | 0 | 14 | 0 | 0 | 0 | 6  | 0 | 0 | 0 | 0 |
| 0 | 0 | 14 | 0 | 0 | 0 | 8  | 0 | 0 | 0 | 0 |
| 0 | 0 | 13 | 0 | 0 | 0 | 10 | 0 | 0 | 0 | 0 |
| 0 | 0 | 23 | 0 | 0 | 1 | 11 | 0 | 0 | 0 | 0 |
| 0 | 0 | 31 | 0 | 0 | 0 | 8  | 0 | 0 | 0 | 0 |
| 0 | 0 | 5  | 0 | 0 | 0 | 5  | 0 | 0 | 0 | 0 |

|   |   |    |   |   |   |    |   |   |   |   |
|---|---|----|---|---|---|----|---|---|---|---|
| 0 | 0 | 31 | 0 | 0 | 0 | 8  | 0 | 0 | 0 | 0 |
| 0 | 0 | 5  | 0 | 0 | 0 | 5  | 0 | 0 | 0 | 0 |
| 0 | 0 | 6  | 0 | 0 | 0 | 3  | 0 | 0 | 0 | 0 |
| 0 | 0 | 50 | 0 | 0 | 0 | 7  | 0 | 0 | 0 | 0 |
| 0 | 0 | 31 | 0 | 0 | 0 | 5  | 0 | 0 | 0 | 0 |
| 0 | 0 | 15 | 0 | 0 | 0 | 2  | 0 | 0 | 0 | 0 |
| 0 | 0 | 26 | 0 | 0 | 0 | 6  | 0 | 0 | 0 | 0 |
| 0 | 0 | 24 | 0 | 0 | 0 | 8  | 0 | 0 | 0 | 0 |
| 0 | 0 | 14 | 0 | 0 | 0 | 1  | 0 | 0 | 0 | 0 |
| 0 | 0 | 25 | 0 | 0 | 0 | 4  | 0 | 0 | 0 | 0 |
| 0 | 0 | 23 | 0 | 0 | 0 | 0  | 0 | 0 | 0 | 0 |
| 0 | 0 | 6  | 0 | 0 | 0 | 4  | 0 | 0 | 0 | 0 |
| 0 | 0 | 20 | 0 | 0 | 0 | 2  | 0 | 0 | 0 | 0 |
| 0 | 0 | 14 | 0 | 0 | 0 | 10 | 0 | 0 | 0 | 0 |
| 0 | 0 | 2  | 0 | 0 | 0 | 2  | 0 | 0 | 0 | 0 |
| 0 | 0 | 11 | 0 | 0 | 1 | 5  | 0 | 0 | 0 | 0 |
| 0 | 0 | 16 | 0 | 0 | 2 | 6  | 0 | 0 | 0 | 0 |
| 0 | 0 | 15 | 0 | 0 | 1 | 5  | 0 | 0 | 0 | 0 |
| 0 | 0 | 27 | 0 | 0 | 4 | 3  | 0 | 0 | 0 | 0 |
| 0 | 0 | 4  | 0 | 0 | 0 | 6  | 1 | 0 | 0 | 0 |
| 0 | 0 | 34 | 0 | 0 | 0 | 11 | 0 | 0 | 0 | 0 |
| 0 | 0 | 13 | 0 | 0 | 0 | 7  | 0 | 0 | 0 | 0 |
| 0 | 0 | 2  | 0 | 0 | 1 | 1  | 0 | 0 | 0 | 0 |
| 0 | 0 | 10 | 0 | 0 | 0 | 5  | 0 | 0 | 0 | 0 |
| 0 | 0 | 12 | 0 | 0 | 1 | 3  | 0 | 0 | 0 | 0 |
| 0 | 0 | 6  | 0 | 0 | 1 | 0  | 0 | 0 | 0 | 0 |
| 0 | 0 | 20 | 0 | 0 | 0 | 2  | 0 | 0 | 0 | 0 |
| 0 | 0 | 16 | 0 | 0 | 0 | 1  | 0 | 0 | 0 | 0 |
| 0 | 0 | 37 | 0 | 0 | 0 | 5  | 0 | 0 | 0 | 0 |

|   |   |    |   |   |   |   |   |   |   |   |
|---|---|----|---|---|---|---|---|---|---|---|
| 0 | 0 | 19 | 0 | 0 | 0 | 9 | 0 | 0 | 0 | 0 |
| 0 | 0 | 25 | 0 | 0 | 1 | 8 | 0 | 0 | 0 | 0 |
| 0 | 0 | 17 | 0 | 0 | 0 | 3 | 0 | 0 | 0 | 0 |
| 0 | 0 | 17 | 0 | 0 | 1 | 5 | 0 | 0 | 0 | 0 |
| 0 | 0 | 17 | 0 | 0 | 0 | 4 | 0 | 0 | 0 | 0 |
| 0 | 0 | 26 | 0 | 0 | 0 | 7 | 0 | 0 | 0 | 0 |
| 0 | 0 | 25 | 0 | 0 | 1 | 7 | 0 | 0 | 0 | 0 |
| 0 | 0 | 9  | 0 | 0 | 1 | 0 | 0 | 0 | 0 | 0 |
| 0 | 0 | 20 | 0 | 0 | 0 | 2 | 0 | 0 | 0 | 0 |
| 0 | 0 | 40 | 0 | 0 | 3 | 4 | 0 | 0 | 0 | 0 |
| 0 | 0 | 8  | 0 | 0 | 0 | 3 | 0 | 0 | 0 | 0 |
| 0 | 0 | 17 | 0 | 0 | 2 | 2 | 0 | 0 | 0 | 0 |
| 0 | 0 | 8  | 0 | 0 | 0 | 0 | 0 | 0 | 0 | 0 |
| 0 | 0 | 0  | 1 | 0 | 1 | 4 | 0 | 0 | 0 | 0 |
| 0 | 0 | 5  | 0 | 0 | 1 | 5 | 0 | 0 | 0 | 0 |
| 0 | 0 | 16 | 0 | 0 | 0 | 0 | 0 | 0 | 0 | 0 |
| 0 | 0 | 10 | 0 | 0 | 1 | 2 | 0 | 0 | 0 | 0 |
| 0 | 0 | 33 | 0 | 0 | 0 | 0 | 0 | 0 | 0 | 0 |
| 0 | 0 | 26 | 0 | 0 | 1 | 4 | 0 | 0 | 0 | 0 |
| 0 | 0 | 4  | 0 | 0 | 0 | 1 | 0 | 0 | 0 | 0 |
| 1 | 0 | 21 | 0 | 0 | 0 | 2 | 0 | 0 | 0 | 0 |
| 0 | 0 | 9  | 0 | 0 | 1 | 4 | 0 | 0 | 0 | 0 |
| 0 | 0 | 74 | 0 | 0 | 0 | 0 | 0 | 0 | 2 | 0 |
| 0 | 0 | 13 | 0 | 0 | 0 | 0 | 0 | 0 | 0 | 0 |
| 2 | 0 | 30 | 0 | 0 | 0 | 1 | 0 | 0 | 0 | 0 |
| 0 | 0 | 5  | 0 | 0 | 0 | 0 | 0 | 0 | 0 | 0 |
| 1 | 0 | 29 | 0 | 0 | 2 | 0 | 0 | 0 | 0 | 0 |
| 0 | 0 | 11 | 0 | 0 | 0 | 1 | 0 | 0 | 0 | 0 |
| 0 | 0 | 38 | 0 | 0 | 0 | 1 | 0 | 0 | 0 | 0 |





|   |   |    |   |   |   |    |   |   |   |   |
|---|---|----|---|---|---|----|---|---|---|---|
| 0 | 0 | 30 | 0 | 0 | 0 | 4  | 0 | 0 | 0 | 0 |
| 0 | 0 | 15 | 0 | 0 | 0 | 6  | 0 | 0 | 0 | 0 |
| 0 | 0 | 22 | 0 | 0 | 0 | 6  | 0 | 0 | 0 | 0 |
| 0 | 0 | 57 | 0 | 0 | 0 | 7  | 0 | 0 | 0 | 0 |
| 0 | 0 | 14 | 0 | 0 | 0 | 0  | 0 | 0 | 0 | 0 |
| 0 | 0 | 9  | 0 | 0 | 0 | 14 | 0 | 0 | 0 | 0 |
| 0 | 0 | 20 | 0 | 0 | 0 | 6  | 0 | 0 | 0 | 0 |
| 0 | 0 | 24 | 0 | 0 | 0 | 4  | 0 | 0 | 0 | 0 |
| 0 | 0 | 70 | 1 | 0 | 0 | 0  | 0 | 0 | 0 | 0 |
| 0 | 0 | 58 | 0 | 0 | 0 | 4  | 0 | 0 | 0 | 0 |
| 0 | 0 | 34 | 0 | 0 | 0 | 4  | 0 | 0 | 0 | 0 |
| 0 | 0 | 25 | 0 | 0 | 1 | 2  | 0 | 0 | 0 | 0 |
| 0 | 0 | 13 | 0 | 0 | 0 | 2  | 0 | 0 | 0 | 0 |
| 0 | 0 | 13 | 0 | 0 | 0 | 0  | 0 | 0 | 0 | 0 |
| 0 | 0 | 28 | 0 | 0 | 0 | 1  | 0 | 0 | 0 | 0 |
| 0 | 0 | 13 | 0 | 0 | 0 | 0  | 0 | 0 | 0 | 0 |
| 0 | 0 | 9  | 0 | 0 | 0 | 1  | 0 | 0 | 0 | 0 |
| 0 | 0 | 19 | 0 | 0 | 0 | 0  | 0 | 0 | 0 | 0 |
| 0 | 0 | 16 | 0 | 0 | 1 | 1  | 0 | 0 | 0 | 0 |
| 0 | 0 | 39 | 0 | 0 | 0 | 1  | 0 | 0 | 0 | 0 |
| 0 | 0 | 32 | 0 | 0 | 0 | 2  | 0 | 0 | 0 | 0 |
| 0 | 0 | 21 | 0 | 0 | 0 | 1  | 0 | 0 | 0 | 0 |
| 0 | 0 | 47 | 0 | 0 | 1 | 1  | 0 | 0 | 0 | 0 |
| 1 | 0 | 36 | 0 | 0 | 1 | 2  | 0 | 0 | 0 | 0 |
| 0 | 0 | 0  | 0 | 0 | 0 | 0  | 0 | 0 | 0 | 0 |
| 3 | 0 | 47 | 0 | 0 | 1 | 2  | 0 | 0 | 0 | 0 |
| 0 | 0 | 9  | 0 | 0 | 4 | 5  | 0 | 0 | 0 | 0 |
| 0 | 0 | 41 | 0 | 0 | 1 | 3  | 0 | 0 | 0 | 0 |
| 0 | 0 | 39 | 0 | 0 | 1 | 1  | 0 | 0 | 0 | 0 |







|   |   |   |   |    |   |   |   |   |   |   |
|---|---|---|---|----|---|---|---|---|---|---|
| 0 | 0 | 0 | 0 | 2  | 0 | 0 | 0 | 0 | 0 | 0 |
| 0 | 0 | 0 | 0 | 0  | 0 | 0 | 0 | 0 | 0 | 0 |
| 0 | 0 | 0 | 0 | 0  | 0 | 1 | 0 | 1 | 0 | 0 |
| 3 | 0 | 0 | 0 | 0  | 0 | 0 | 0 | 1 | 0 | 0 |
| 1 | 0 | 0 | 0 | 3  | 0 | 0 | 0 | 0 | 0 | 0 |
| 2 | 0 | 0 | 1 | 1  | 0 | 0 | 0 | 0 | 0 | 0 |
| 0 | 0 | 0 | 0 | 1  | 0 | 0 | 0 | 0 | 0 | 0 |
| 0 | 0 | 0 | 0 | 1  | 0 | 0 | 0 | 0 | 0 | 0 |
| 1 | 0 | 1 | 0 | 11 | 0 | 0 | 0 | 0 | 1 | 0 |
| 0 | 0 | 0 | 0 | 0  | 0 | 0 | 0 | 0 | 0 | 0 |
| 0 | 0 | 0 | 0 | 0  | 0 | 0 | 0 | 0 | 3 | 0 |
| 0 | 0 | 0 | 0 | 1  | 0 | 0 | 0 | 0 | 0 | 0 |
| 1 | 0 | 0 | 0 | 1  | 0 | 0 | 0 | 0 | 1 | 0 |
| 0 | 0 | 0 | 0 | 2  | 0 | 0 | 0 | 0 | 0 | 0 |
| 0 | 0 | 0 | 1 | 0  | 0 | 3 | 0 | 0 | 0 | 0 |
| 1 | 0 | 0 | 0 | 0  | 0 | 2 | 0 | 0 | 0 | 0 |
| 0 | 0 | 0 | 0 | 5  | 0 | 0 | 0 | 0 | 0 | 0 |
| 1 | 0 | 0 | 0 | 0  | 0 | 0 | 0 | 0 | 0 | 0 |
| 0 | 0 | 0 | 0 | 3  | 0 | 1 | 0 | 0 | 0 | 0 |
| 0 | 0 | 0 | 0 | 0  | 0 | 0 | 0 | 0 | 3 | 0 |
| 1 | 0 | 0 | 0 | 1  | 0 | 0 | 0 | 0 | 0 | 0 |
| 2 | 0 | 0 | 0 | 35 | 0 | 0 | 0 | 1 | 0 | 0 |
| 1 | 0 | 0 | 0 | 14 | 0 | 0 | 0 | 0 | 0 | 0 |
| 1 | 0 | 0 | 0 | 0  | 0 | 0 | 0 | 0 | 0 | 0 |
| 0 | 0 | 0 | 0 | 3  | 0 | 0 | 0 | 0 | 0 | 0 |
| 0 | 0 | 0 | 0 | 3  | 0 | 0 | 0 | 0 | 0 | 0 |
| 0 | 0 | 0 | 0 | 0  | 0 | 0 | 0 | 0 | 0 | 0 |
| 0 | 0 | 0 | 0 | 1  | 0 | 0 | 0 | 0 | 0 | 0 |
| 0 | 0 | 0 | 0 | 2  | 0 | 0 | 0 | 0 | 0 | 0 |

|   |   |   |   |    |   |    |   |   |   |   |
|---|---|---|---|----|---|----|---|---|---|---|
| 0 | 0 | 0 | 0 | 0  | 0 | 0  | 0 | 0 | 0 | 0 |
| 0 | 0 | 0 | 1 | 0  | 0 | 0  | 0 | 0 | 0 | 0 |
| 0 | 0 | 0 | 0 | 2  | 0 | 1  | 0 | 0 | 0 | 0 |
| 1 | 0 | 0 | 0 | 0  | 0 | 5  | 0 | 0 | 0 | 0 |
| 0 | 0 | 0 | 0 | 1  | 0 | 0  | 0 | 0 | 2 | 0 |
| 0 | 0 | 0 | 0 | 1  | 0 | 0  | 0 | 0 | 2 | 0 |
| 1 | 0 | 0 | 1 | 2  | 0 | 0  | 0 | 0 | 0 | 0 |
| 0 | 0 | 0 | 0 | 16 | 0 | 0  | 0 | 0 | 0 | 0 |
| 0 | 0 | 0 | 0 | 2  | 0 | 0  | 0 | 0 | 0 | 0 |
| 0 | 0 | 0 | 0 | 0  | 0 | 0  | 0 | 0 | 0 | 0 |
| 0 | 0 | 0 | 0 | 0  | 0 | 0  | 0 | 0 | 0 | 0 |
| 0 | 0 | 0 | 0 | 1  | 0 | 0  | 0 | 0 | 0 | 0 |
| 0 | 0 | 0 | 1 | 0  | 0 | 0  | 0 | 0 | 0 | 0 |
| 0 | 0 | 0 | 0 | 0  | 0 | 0  | 0 | 0 | 0 | 0 |
| 0 | 0 | 0 | 1 | 0  | 0 | 0  | 0 | 0 | 0 | 0 |
| 0 | 0 | 0 | 0 | 0  | 0 | 0  | 0 | 0 | 0 | 0 |
| 0 | 0 | 0 | 0 | 0  | 0 | 1  | 0 | 0 | 0 | 0 |
| 0 | 0 | 0 | 0 | 0  | 0 | 0  | 0 | 0 | 0 | 0 |
| 0 | 0 | 0 | 0 | 0  | 0 | 0  | 0 | 0 | 0 | 0 |
| 0 | 0 | 0 | 0 | 0  | 0 | 0  | 0 | 0 | 0 | 0 |
| 0 | 0 | 0 | 0 | 3  | 0 | 0  | 0 | 0 | 0 | 0 |
| 0 | 0 | 0 | 0 | 1  | 0 | 0  | 0 | 0 | 0 | 0 |
| 0 | 0 | 0 | 0 | 0  | 0 | 16 | 0 | 0 | 0 | 0 |
| 1 | 0 | 0 | 0 | 0  | 0 | 1  | 0 | 0 | 6 | 0 |
| 0 | 0 | 0 | 0 | 0  | 0 | 3  | 0 | 0 | 0 | 0 |
| 0 | 0 | 0 | 0 | 0  | 0 | 0  | 0 | 0 | 1 | 0 |
| 0 | 0 | 0 | 0 | 0  | 0 | 0  | 0 | 0 | 0 | 0 |
| 0 | 0 | 0 | 0 | 0  | 0 | 0  | 0 | 0 | 0 | 0 |
| 0 | 0 | 0 | 0 | 0  | 0 | 0  | 0 | 0 | 2 | 0 |
| 0 | 0 | 0 | 0 | 3  | 0 | 0  | 0 | 0 | 1 | 0 |

|   |   |   |   |    |   |    |   |   |    |   |
|---|---|---|---|----|---|----|---|---|----|---|
| 0 | 0 | 0 | 0 | 4  | 0 | 0  | 0 | 0 | 1  | 0 |
| 0 | 0 | 0 | 0 | 1  | 0 | 0  | 0 | 0 | 8  | 0 |
| 1 | 0 | 0 | 0 | 4  | 0 | 0  | 0 | 0 | 0  | 0 |
| 0 | 0 | 0 | 1 | 10 | 0 | 0  | 0 | 0 | 0  | 0 |
| 0 | 0 | 0 | 0 | 0  | 0 | 2  | 0 | 0 | 0  | 0 |
| 0 | 0 | 0 | 0 | 0  | 0 | 1  | 0 | 0 | 0  | 0 |
| 0 | 0 | 0 | 0 | 0  | 0 | 0  | 0 | 0 | 0  | 0 |
| 0 | 0 | 0 | 0 | 0  | 0 | 1  | 0 | 0 | 0  | 0 |
| 0 | 0 | 0 | 0 | 0  | 0 | 0  | 0 | 0 | 0  | 0 |
| 0 | 0 | 0 | 0 | 9  | 0 | 0  | 0 | 0 | 0  | 0 |
| 0 | 0 | 0 | 0 | 0  | 0 | 0  | 0 | 0 | 0  | 0 |
| 0 | 0 | 0 | 0 | 0  | 0 | 0  | 0 | 0 | 0  | 0 |
| 0 | 0 | 0 | 0 | 3  | 0 | 0  | 0 | 0 | 0  | 0 |
| 1 | 0 | 0 | 0 | 0  | 0 | 37 | 0 | 0 | 0  | 0 |
| 0 | 0 | 0 | 0 | 0  | 0 | 1  | 0 | 0 | 3  | 0 |
| 0 | 0 | 0 | 1 | 0  | 0 | 21 | 0 | 0 | 0  | 0 |
| 0 | 0 | 0 | 0 | 0  | 0 | 1  | 0 | 0 | 1  | 0 |
| 0 | 0 | 0 | 0 | 1  | 0 | 0  | 0 | 0 | 0  | 0 |
| 0 | 0 | 0 | 0 | 0  | 0 | 5  | 0 | 0 | 0  | 0 |
| 0 | 0 | 0 | 0 | 1  | 0 | 1  | 0 | 0 | 0  | 0 |
| 0 | 0 | 0 | 0 | 1  | 0 | 0  | 0 | 1 | 0  | 0 |
| 0 | 0 | 0 | 0 | 2  | 0 | 1  | 0 | 0 | 0  | 0 |
| 0 | 0 | 0 | 0 | 3  | 0 | 0  | 0 | 0 | 0  | 0 |
| 1 | 0 | 0 | 0 | 5  | 0 | 0  | 0 | 0 | 0  | 0 |
| 1 | 0 | 0 | 2 | 4  | 0 | 0  | 0 | 0 | 1  | 0 |
| 0 | 0 | 0 | 0 | 0  | 0 | 1  | 0 | 0 | 0  | 0 |
| 0 | 0 | 0 | 0 | 0  | 0 | 0  | 0 | 0 | 2  | 0 |
| 0 | 0 | 0 | 0 | 3  | 0 | 0  | 0 | 0 | 0  | 0 |
| 0 | 0 | 0 | 0 | 0  | 0 | 1  | 0 | 0 | 27 | 0 |



|   |   |   |   |   |   |   |   |   |   |   |
|---|---|---|---|---|---|---|---|---|---|---|
| 0 | 0 | 0 | 0 | 0 | 0 | 0 | 0 | 0 | 3 | 0 |
| 1 | 0 | 0 | 0 | 0 | 0 | 1 | 0 | 0 | 6 | 0 |
| 0 | 0 | 0 | 0 | 0 | 0 | 1 | 0 | 0 | 0 | 0 |
| 1 | 0 | 0 | 1 | 0 | 0 | 0 | 0 | 0 | 0 | 0 |
| 2 | 0 | 0 | 0 | 1 | 0 | 1 | 0 | 0 | 0 | 0 |
| 0 | 0 | 0 | 3 | 0 | 0 | 0 | 0 | 0 | 3 | 0 |
| 2 | 0 | 0 | 0 | 0 | 0 | 0 | 0 | 0 | 4 | 0 |
| 1 | 0 | 0 | 1 | 0 | 0 | 1 | 0 | 0 | 1 | 0 |
| 0 | 0 | 0 | 2 | 0 | 0 | 1 | 0 | 0 | 3 | 0 |
| 0 | 0 | 0 | 2 | 1 | 0 | 0 | 0 | 0 | 7 | 0 |
| 0 | 0 | 0 | 5 | 1 | 0 | 0 | 0 | 0 | 2 | 0 |
| 1 | 0 | 0 | 5 | 0 | 0 | 0 | 0 | 0 | 5 | 0 |
| 0 | 0 | 0 | 0 | 0 | 0 | 0 | 0 | 0 | 0 | 0 |
| 2 | 0 | 0 | 1 | 0 | 0 | 0 | 0 | 0 | 0 | 0 |
| 0 | 0 | 0 | 0 | 0 | 0 | 4 | 0 | 0 | 3 | 0 |
| 0 | 0 | 0 | 0 | 0 | 0 | 1 | 0 | 0 | 1 | 0 |
| 0 | 0 | 0 | 0 | 0 | 0 | 0 | 0 | 0 | 0 | 0 |
| 0 | 0 | 0 | 0 | 0 | 0 | 0 | 0 | 0 | 0 | 0 |
| 0 | 0 | 0 | 0 | 0 | 0 | 1 | 0 | 0 | 8 | 0 |
| 0 | 0 | 0 | 0 | 0 | 0 | 0 | 0 | 0 | 0 | 0 |
| 0 | 0 | 0 | 0 | 0 | 0 | 0 | 0 | 1 | 0 | 0 |
| 0 | 0 | 0 | 0 | 0 | 0 | 0 | 0 | 0 | 3 | 0 |
| 0 | 0 | 0 | 0 | 0 | 0 | 0 | 0 | 0 | 0 | 0 |
| 0 | 0 | 0 | 0 | 0 | 0 | 0 | 0 | 0 | 0 | 0 |
| 1 | 0 | 0 | 0 | 0 | 0 | 2 | 0 | 0 | 5 | 0 |
| 0 | 0 | 0 | 2 | 0 | 0 | 5 | 0 | 0 | 3 | 0 |
| 0 | 0 | 0 | 0 | 0 | 0 | 1 | 0 | 0 | 3 | 0 |
| 0 | 0 | 0 | 1 | 0 | 0 | 7 | 0 | 0 | 3 | 0 |
| 1 | 0 | 0 | 2 | 0 | 0 | 0 | 0 | 0 | 0 | 0 |

|   |   |   |   |   |   |    |   |   |   |   |
|---|---|---|---|---|---|----|---|---|---|---|
| 0 | 0 | 0 | 4 | 0 | 0 | 3  | 0 | 0 | 5 | 0 |
| 0 | 0 | 0 | 6 | 0 | 0 | 3  | 0 | 0 | 0 | 0 |
| 0 | 0 | 0 | 2 | 0 | 0 | 1  | 0 | 0 | 0 | 0 |
| 0 | 0 | 0 | 2 | 0 | 0 | 3  | 0 | 0 | 0 | 0 |
| 0 | 0 | 0 | 3 | 0 | 0 | 0  | 0 | 0 | 0 | 0 |
| 0 | 0 | 0 | 4 | 0 | 0 | 10 | 0 | 0 | 4 | 0 |
| 0 | 0 | 0 | 5 | 0 | 1 | 11 | 0 | 0 | 2 | 0 |
| 0 | 0 | 0 | 1 | 0 | 0 | 13 | 0 | 0 | 0 | 0 |
| 0 | 0 | 0 | 2 | 0 | 0 | 6  | 0 | 0 | 2 | 0 |
| 0 | 0 | 0 | 2 | 0 | 0 | 18 | 0 | 0 | 0 | 0 |
| 0 | 0 | 0 | 0 | 0 | 0 | 6  | 0 | 0 | 5 | 0 |
| 0 | 0 | 0 | 1 | 0 | 0 | 6  | 0 | 0 | 0 | 0 |
| 0 | 0 | 0 | 2 | 0 | 0 | 6  | 0 | 0 | 0 | 0 |
| 0 | 0 | 0 | 0 | 0 | 0 | 9  | 0 | 0 | 0 | 0 |
| 0 | 0 | 0 | 2 | 0 | 0 | 7  | 0 | 0 | 1 | 0 |
| 0 | 0 | 0 | 4 | 0 | 0 | 5  | 0 | 0 | 0 | 0 |
| 0 | 0 | 0 | 3 | 0 | 0 | 7  | 0 | 0 | 2 | 0 |
| 0 | 0 | 0 | 2 | 0 | 0 | 10 | 0 | 0 | 0 | 0 |
| 1 | 0 | 0 | 0 | 0 | 0 | 10 | 0 | 0 | 0 | 0 |
| 0 | 0 | 0 | 0 | 0 | 0 | 9  | 0 | 0 | 2 | 0 |
| 2 | 0 | 0 | 1 | 0 | 0 | 2  | 0 | 0 | 0 | 0 |
| 1 | 0 | 0 | 1 | 0 | 0 | 7  | 0 | 0 | 0 | 0 |
| 1 | 0 | 0 | 1 | 0 | 0 | 14 | 0 | 0 | 1 | 0 |
| 0 | 0 | 0 | 0 | 0 | 0 | 13 | 0 | 0 | 0 | 0 |
| 1 | 0 | 0 | 1 | 0 | 0 | 6  | 0 | 0 | 0 | 0 |
| 0 | 0 | 0 | 0 | 0 | 0 | 11 | 0 | 0 | 0 | 0 |
| 1 | 0 | 0 | 0 | 0 | 0 | 10 | 0 | 0 | 0 | 0 |
| 0 | 0 | 0 | 0 | 0 | 0 | 10 | 0 | 0 | 0 | 0 |
| 0 | 0 | 0 | 0 | 0 | 0 | 31 | 0 | 0 | 2 | 0 |

|   |   |   |   |   |   |    |   |   |   |   |
|---|---|---|---|---|---|----|---|---|---|---|
| 1 | 0 | 0 | 0 | 0 | 0 | 4  | 0 | 0 | 2 | 0 |
| 0 | 0 | 0 | 0 | 0 | 0 | 7  | 0 | 0 | 2 | 0 |
| 0 | 0 | 0 | 0 | 0 | 0 | 3  | 0 | 0 | 8 | 0 |
| 0 | 0 | 0 | 0 | 0 | 0 | 9  | 0 | 0 | 2 | 0 |
| 1 | 0 | 0 | 0 | 0 | 0 | 10 | 0 | 0 | 2 | 0 |
| 0 | 0 | 0 | 0 | 0 | 0 | 17 | 0 | 0 | 5 | 0 |
| 0 | 0 | 0 | 0 | 0 | 0 | 9  | 0 | 0 | 0 | 0 |
| 0 | 0 | 0 | 0 | 0 | 0 | 14 | 0 | 0 | 0 | 0 |
| 0 | 0 | 0 | 1 | 0 | 0 | 22 | 0 | 0 | 1 | 0 |
| 0 | 0 | 0 | 4 | 0 | 0 | 7  | 0 | 0 | 0 | 0 |
| 0 | 0 | 0 | 4 | 0 | 0 | 33 | 0 | 0 | 1 | 0 |
| 0 | 0 | 0 | 0 | 0 | 0 | 13 | 0 | 0 | 0 | 0 |
| 0 | 0 | 0 | 2 | 0 | 0 | 34 | 0 | 0 | 0 | 0 |
| 0 | 0 | 0 | 2 | 0 | 0 | 36 | 0 | 0 | 1 | 0 |
| 0 | 0 | 0 | 1 | 0 | 0 | 47 | 0 | 0 | 0 | 0 |
| 0 | 0 | 0 | 4 | 0 | 0 | 47 | 0 | 0 | 0 | 0 |
| 0 | 0 | 0 | 1 | 0 | 0 | 30 | 0 | 0 | 0 | 0 |
| 0 | 0 | 0 | 8 | 0 | 0 | 19 | 0 | 0 | 1 | 0 |
| 0 | 0 | 0 | 0 | 0 | 0 | 12 | 0 | 0 | 0 | 0 |
| 0 | 0 | 0 | 3 | 0 | 0 | 5  | 0 | 0 | 1 | 0 |
| 1 | 0 | 0 | 7 | 0 | 0 | 8  | 0 | 0 | 1 | 0 |
| 0 | 0 | 0 | 0 | 0 | 0 | 9  | 0 | 0 | 0 | 0 |
| 0 | 0 | 0 | 8 | 0 | 0 | 16 | 0 | 0 | 1 | 0 |
| 0 | 0 | 0 | 4 | 0 | 0 | 15 | 0 | 1 | 1 | 0 |
| 0 | 0 | 0 | 5 | 1 | 0 | 10 | 0 | 0 | 2 | 0 |
| 1 | 0 | 0 | 3 | 0 | 0 | 18 | 0 | 0 | 6 | 0 |
| 0 | 0 | 0 | 2 | 0 | 0 | 4  | 0 | 0 | 0 | 0 |
| 0 | 0 | 0 | 7 | 0 | 0 | 3  | 0 | 0 | 1 | 0 |
| 0 | 0 | 0 | 6 | 0 | 0 | 2  | 0 | 0 | 0 | 0 |





|   |   |   |   |    |   |   |   |   |    |   |
|---|---|---|---|----|---|---|---|---|----|---|
| 0 | 0 | 0 | 0 | 2  | 0 | 0 | 0 | 0 | 12 | 0 |
| 1 | 0 | 0 | 0 | 4  | 0 | 0 | 0 | 0 | 0  | 0 |
| 0 | 0 | 0 | 0 | 1  | 0 | 0 | 0 | 0 | 16 | 0 |
| 0 | 0 | 0 | 0 | 12 | 0 | 0 | 0 | 0 | 1  | 0 |
| 0 | 0 | 0 | 0 | 1  | 0 | 1 | 0 | 0 | 0  | 0 |
| 0 | 0 | 0 | 0 | 3  | 0 | 0 | 0 | 0 | 0  | 0 |
| 0 | 0 | 0 | 1 | 4  | 0 | 0 | 0 | 0 | 1  | 0 |
| 0 | 0 | 0 | 0 | 2  | 0 | 1 | 0 | 1 | 0  | 0 |
| 0 | 0 | 0 | 0 | 7  | 0 | 0 | 0 | 2 | 1  | 0 |
| 0 | 0 | 0 | 0 | 0  | 0 | 0 | 0 | 1 | 0  | 0 |
| 0 | 0 | 0 | 0 | 4  | 0 | 0 | 0 | 0 | 0  | 0 |
| 0 | 0 | 0 | 0 | 0  | 0 | 0 | 0 | 0 | 1  | 0 |
| 0 | 0 | 0 | 0 | 1  | 0 | 0 | 0 | 0 | 0  | 0 |
| 0 | 0 | 0 | 0 | 2  | 0 | 0 | 0 | 0 | 0  | 0 |
| 0 | 0 | 0 | 0 | 0  | 0 | 0 | 0 | 0 | 0  | 0 |
| 0 | 0 | 0 | 0 | 26 | 0 | 0 | 0 | 0 | 0  | 0 |
| 0 | 0 | 0 | 0 | 33 | 0 | 0 | 0 | 1 | 0  | 0 |
| 0 | 0 | 0 | 0 | 11 | 0 | 0 | 0 | 0 | 0  | 0 |
| 0 | 0 | 0 | 0 | 0  | 0 | 0 | 0 | 0 | 0  | 0 |
| 0 | 0 | 0 | 0 | 0  | 0 | 0 | 0 | 0 | 0  | 0 |
| 0 | 0 | 0 | 0 | 0  | 0 | 0 | 0 | 0 | 1  | 0 |
| 0 | 0 | 0 | 0 | 22 | 0 | 0 | 0 | 0 | 0  | 0 |
| 0 | 0 | 0 | 0 | 0  | 0 | 0 | 0 | 0 | 0  | 0 |
| 0 | 0 | 0 | 0 | 0  | 0 | 0 | 0 | 0 | 0  | 0 |
| 0 | 0 | 0 | 0 | 0  | 0 | 1 | 0 | 0 | 0  | 0 |
| 0 | 0 | 0 | 0 | 0  | 0 | 0 | 0 | 0 | 35 | 0 |
| 0 | 0 | 0 | 0 | 0  | 0 | 0 | 0 | 0 | 0  | 0 |
| 0 | 0 | 0 | 0 | 0  | 0 | 0 | 0 | 0 | 29 | 1 |
| 0 | 0 | 0 | 0 | 6  | 0 | 0 | 0 | 0 | 0  | 0 |



|   |   |   |   |    |   |   |   |   |   |   |   |
|---|---|---|---|----|---|---|---|---|---|---|---|
| 0 | 0 | 0 | 0 | 0  | 0 | 0 | 0 | 0 | 0 | 0 | 0 |
| 0 | 0 | 0 | 0 | 0  | 0 | 0 | 0 | 0 | 0 | 0 | 0 |
| 0 | 0 | 0 | 0 | 0  | 0 | 0 | 0 | 0 | 0 | 0 | 0 |
| 0 | 0 | 0 | 0 | 1  | 0 | 0 | 0 | 0 | 0 | 0 | 0 |
| 0 | 0 | 0 | 0 | 0  | 0 | 0 | 0 | 0 | 0 | 1 | 0 |
| 0 | 0 | 0 | 0 | 12 | 0 | 0 | 0 | 0 | 0 | 0 | 0 |
| 0 | 0 | 0 | 0 | 0  | 0 | 0 | 0 | 0 | 0 | 0 | 0 |
| 0 | 0 | 0 | 0 | 0  | 0 | 0 | 0 | 0 | 0 | 0 | 0 |
| 0 | 0 | 0 | 0 | 0  | 0 | 0 | 0 | 0 | 0 | 0 | 0 |
| 8 | 0 | 0 | 1 | 0  | 0 | 0 | 0 | 0 | 0 | 0 | 0 |
| 0 | 0 | 0 | 0 | 0  | 0 | 0 | 0 | 0 | 0 | 2 | 0 |
| 0 | 0 | 0 | 1 | 1  | 0 | 1 | 0 | 0 | 0 | 1 | 0 |
| 0 | 0 | 0 | 0 | 3  | 0 | 0 | 0 | 0 | 0 | 0 | 0 |
| 0 | 0 | 0 | 1 | 2  | 0 | 0 | 0 | 0 | 0 | 0 | 0 |
| 0 | 0 | 0 | 0 | 0  | 0 | 0 | 0 | 0 | 0 | 0 | 0 |
| 0 | 0 | 0 | 0 | 1  | 0 | 0 | 0 | 0 | 0 | 0 | 0 |
| 0 | 0 | 0 | 0 | 0  | 0 | 0 | 0 | 0 | 0 | 0 | 0 |
| 0 | 0 | 0 | 0 | 11 | 0 | 0 | 0 | 0 | 0 | 0 | 0 |
| 0 | 0 | 0 | 0 | 3  | 0 | 0 | 0 | 0 | 0 | 0 | 0 |
| 2 | 0 | 0 | 0 | 11 | 0 | 0 | 0 | 0 | 0 | 0 | 0 |
| 0 | 0 | 0 | 0 | 1  | 0 | 0 | 0 | 0 | 0 | 1 | 0 |
| 0 | 0 | 0 | 0 | 2  | 0 | 1 | 0 | 0 | 0 | 2 | 0 |
| 0 | 0 | 0 | 0 | 0  | 0 | 0 | 0 | 0 | 0 | 1 | 0 |
| 0 | 0 | 0 | 0 | 0  | 0 | 0 | 0 | 0 | 0 | 1 | 0 |
| 0 | 0 | 0 | 0 | 0  | 0 | 0 | 0 | 0 | 0 | 0 | 0 |
| 0 | 1 | 0 | 0 | 1  | 0 | 0 | 0 | 0 | 0 | 0 | 0 |
| 0 | 0 | 0 | 0 | 0  | 0 | 1 | 0 | 0 | 0 | 1 | 0 |
| 0 | 0 | 0 | 0 | 0  | 0 | 0 | 0 | 0 | 0 | 4 | 0 |
| 0 | 0 | 0 | 0 | 0  | 0 | 1 | 0 | 0 | 0 | 0 | 0 |

|   |   |   |    |   |   |    |   |   |    |   |
|---|---|---|----|---|---|----|---|---|----|---|
| 0 | 0 | 0 | 0  | 0 | 0 | 0  | 0 | 0 | 3  | 0 |
| 0 | 0 | 0 | 0  | 1 | 0 | 0  | 0 | 0 | 2  | 0 |
| 0 | 0 | 0 | 0  | 0 | 0 | 0  | 0 | 0 | 6  | 0 |
| 0 | 0 | 0 | 0  | 0 | 0 | 4  | 0 | 0 | 16 | 0 |
| 0 | 0 | 0 | 1  | 0 | 0 | 0  | 0 | 0 | 0  | 0 |
| 0 | 0 | 0 | 0  | 0 | 0 | 0  | 0 | 0 | 0  | 0 |
| 0 | 0 | 0 | 0  | 0 | 0 | 0  | 0 | 0 | 18 | 0 |
| 0 | 0 | 0 | 0  | 0 | 0 | 0  | 0 | 0 | 17 | 0 |
| 0 | 0 | 0 | 0  | 0 | 0 | 0  | 0 | 0 | 17 | 0 |
| 0 | 0 | 0 | 1  | 0 | 0 | 0  | 0 | 0 | 5  | 0 |
| 0 | 0 | 0 | 1  | 0 | 0 | 0  | 0 | 0 | 3  | 0 |
| 0 | 0 | 0 | 1  | 0 | 0 | 0  | 0 | 0 | 1  | 0 |
| 0 | 0 | 0 | 0  | 0 | 0 | 3  | 0 | 0 | 1  | 0 |
| 1 | 0 | 0 | 3  | 0 | 0 | 5  | 0 | 0 | 7  | 0 |
| 0 | 0 | 0 | 0  | 0 | 0 | 0  | 0 | 0 | 0  | 0 |
| 0 | 0 | 0 | 3  | 0 | 0 | 1  | 0 | 0 | 7  | 0 |
| 0 | 0 | 0 | 5  | 0 | 0 | 1  | 0 | 0 | 8  | 0 |
| 0 | 0 | 0 | 2  | 0 | 0 | 3  | 0 | 0 | 0  | 0 |
| 0 | 0 | 0 | 4  | 0 | 0 | 1  | 0 | 0 | 0  | 0 |
| 0 | 0 | 0 | 6  | 0 | 0 | 5  | 0 | 0 | 0  | 0 |
| 0 | 0 | 0 | 5  | 0 | 0 | 6  | 0 | 0 | 0  | 0 |
| 0 | 0 | 0 | 2  | 0 | 0 | 9  | 0 | 0 | 0  | 0 |
| 0 | 0 | 0 | 6  | 0 | 0 | 7  | 0 | 0 | 5  | 0 |
| 0 | 0 | 0 | 1  | 0 | 0 | 15 | 0 | 0 | 1  | 0 |
| 0 | 0 | 0 | 12 | 0 | 0 | 7  | 0 | 0 | 7  | 0 |
| 0 | 0 | 0 | 2  | 0 | 0 | 9  | 0 | 0 | 3  | 0 |
| 0 | 0 | 0 | 7  | 0 | 0 | 22 | 0 | 0 | 0  | 0 |
| 0 | 0 | 0 | 3  | 0 | 0 | 23 | 0 | 0 | 1  | 0 |
| 0 | 0 | 0 | 3  | 0 | 0 | 28 | 0 | 0 | 0  | 0 |













|   |   |   |   |   |   |   |   |   |   |   |
|---|---|---|---|---|---|---|---|---|---|---|
| 0 | 1 | 0 | 0 | 0 | 0 | 0 | 0 | 0 | 0 | 4 |
| 0 | 2 | 1 | 0 | 0 | 0 | 0 | 0 | 0 | 0 | 1 |
| 0 | 1 | 0 | 0 | 0 | 0 | 0 | 0 | 0 | 0 | 2 |
| 0 | 0 | 0 | 0 | 0 | 0 | 0 | 0 | 0 | 0 | 2 |
| 0 | 1 | 0 | 0 | 0 | 0 | 0 | 0 | 0 | 0 | 1 |
| 0 | 0 | 0 | 0 | 0 | 0 | 0 | 0 | 0 | 0 | 1 |
| 0 | 1 | 0 | 0 | 0 | 0 | 0 | 0 | 0 | 0 | 1 |
| 0 | 0 | 0 | 0 | 0 | 0 | 0 | 0 | 0 | 0 | 0 |
| 0 | 2 | 0 | 0 | 0 | 0 | 0 | 0 | 0 | 0 | 1 |
| 0 | 0 | 0 | 0 | 0 | 0 | 0 | 0 | 0 | 0 | 0 |
| 0 | 0 | 0 | 0 | 0 | 0 | 0 | 0 | 0 | 0 | 0 |
| 0 | 1 | 0 | 0 | 0 | 1 | 0 | 0 | 0 | 0 | 0 |
| 0 | 0 | 0 | 0 | 0 | 0 | 0 | 0 | 0 | 0 | 0 |
| 0 | 2 | 0 | 0 | 0 | 0 | 0 | 0 | 0 | 0 | 0 |
| 0 | 0 | 0 | 0 | 0 | 0 | 0 | 0 | 0 | 0 | 2 |
| 0 | 7 | 0 | 0 | 0 | 0 | 0 | 0 | 0 | 0 | 0 |
| 0 | 0 | 0 | 0 | 0 | 0 | 0 | 0 | 0 | 0 | 0 |
| 0 | 3 | 0 | 0 | 0 | 0 | 0 | 0 | 0 | 0 | 0 |
| 0 | 0 | 0 | 0 | 0 | 0 | 0 | 0 | 0 | 0 | 1 |
| 0 | 1 | 0 | 0 | 0 | 0 | 0 | 0 | 0 | 0 | 1 |
| 0 | 1 | 1 | 0 | 0 | 0 | 0 | 0 | 0 | 0 | 0 |
| 0 | 2 | 0 | 0 | 1 | 0 | 0 | 0 | 0 | 0 | 0 |
| 0 | 2 | 0 | 0 | 0 | 0 | 0 | 0 | 0 | 0 | 0 |
| 0 | 1 | 0 | 0 | 0 | 0 | 0 | 0 | 0 | 0 | 0 |
| 0 | 1 | 1 | 0 | 0 | 0 | 0 | 0 | 0 | 0 | 0 |
| 0 | 0 | 0 | 0 | 0 | 0 | 0 | 0 | 0 | 0 | 0 |
| 0 | 0 | 0 | 0 | 0 | 1 | 0 | 0 | 0 | 0 | 0 |
| 0 | 0 | 0 | 0 | 0 | 0 | 0 | 0 | 0 | 0 | 0 |
| 0 | 0 | 0 | 0 | 0 | 0 | 0 | 1 | 0 | 0 | 0 |



















|   |   |   |   |   |   |   |   |   |   |   |   |   |
|---|---|---|---|---|---|---|---|---|---|---|---|---|
| 0 | 0 | 0 | 0 | 0 | 0 | 0 | 0 | 0 | 0 | 0 | 0 | 0 |
| 0 | 0 | 0 | 0 | 0 | 0 | 0 | 0 | 0 | 0 | 0 | 0 | 3 |
| 0 | 0 | 0 | 0 | 0 | 1 | 0 | 0 | 0 | 0 | 0 | 0 | 0 |
| 0 | 0 | 0 | 0 | 0 | 0 | 0 | 0 | 0 | 0 | 0 | 0 | 0 |
| 0 | 0 | 0 | 0 | 0 | 0 | 0 | 0 | 0 | 0 | 0 | 0 | 0 |
| 0 | 0 | 0 | 0 | 0 | 1 | 0 | 0 | 0 | 0 | 0 | 0 | 0 |
| 0 | 0 | 0 | 0 | 0 | 0 | 0 | 0 | 0 | 0 | 0 | 0 | 0 |
| 0 | 0 | 0 | 0 | 0 | 0 | 1 | 0 | 0 | 0 | 0 | 0 | 0 |
| 0 | 0 | 0 | 0 | 0 | 0 | 0 | 0 | 0 | 0 | 0 | 0 | 0 |
| 0 | 1 | 0 | 0 | 0 | 0 | 0 | 0 | 0 | 0 | 0 | 0 | 0 |
| 0 | 0 | 0 | 0 | 0 | 0 | 0 | 0 | 0 | 0 | 0 | 0 | 0 |
| 0 | 0 | 0 | 0 | 0 | 1 | 0 | 0 | 0 | 0 | 0 | 0 | 0 |
| 0 | 0 | 0 | 0 | 0 | 0 | 0 | 0 | 0 | 0 | 0 | 0 | 0 |
| 0 | 0 | 0 | 0 | 0 | 1 | 0 | 0 | 0 | 0 | 0 | 0 | 0 |
| 0 | 0 | 0 | 0 | 0 | 0 | 0 | 0 | 0 | 0 | 0 | 0 | 2 |
| 0 | 0 | 0 | 0 | 0 | 1 | 0 | 0 | 0 | 0 | 0 | 0 | 0 |
| 0 | 0 | 0 | 0 | 0 | 0 | 0 | 0 | 0 | 0 | 0 | 0 | 0 |
| 0 | 0 | 0 | 0 | 0 | 1 | 0 | 0 | 0 | 0 | 0 | 0 | 0 |

| spion | syllid | terebe | torhur | zealut | zeasub | zoeasp |
|-------|--------|--------|--------|--------|--------|--------|
| 0     | 0      | 0      | 0      | 0      | 0      | 0      |
| 0     | 0      | 0      | 0      | 0      | 0      | 0      |
| 0     | 0      | 0      | 0      | 0      | 0      | 0      |
| 0     | 0      | 0      | 0      | 0      | 1      | 0      |
| 0     | 0      | 0      | 0      | 1      | 0      | 0      |
| 0     | 0      | 0      | 0      | 0      | 7      | 0      |
| 0     | 0      | 0      | 0      | 0      | 0      | 0      |
| 0     | 0      | 0      | 0      | 0      | 0      | 0      |



|   |   |   |   |   |   |   |
|---|---|---|---|---|---|---|
| 0 | 0 | 0 | 0 | 0 | 0 | 0 |
| 0 | 0 | 0 | 0 | 0 | 0 | 0 |
| 0 | 0 | 0 | 0 | 0 | 0 | 0 |
| 0 | 0 | 0 | 0 | 0 | 0 | 0 |
| 0 | 0 | 0 | 0 | 0 | 0 | 0 |
| 0 | 0 | 0 | 0 | 2 | 0 | 0 |
| 0 | 0 | 0 | 0 | 0 | 0 | 0 |
| 0 | 0 | 0 | 0 | 0 | 0 | 0 |
| 0 | 0 | 0 | 0 | 0 | 0 | 0 |
| 0 | 0 | 0 | 0 | 0 | 0 | 0 |
| 0 | 0 | 0 | 0 | 2 | 0 | 0 |
| 0 | 0 | 0 | 0 | 0 | 0 | 0 |
| 0 | 0 | 0 | 0 | 5 | 0 | 0 |
| 0 | 0 | 0 | 0 | 1 | 1 | 0 |
| 0 | 0 | 0 | 0 | 0 | 0 | 0 |
| 0 | 0 | 0 | 0 | 2 | 0 | 0 |
| 0 | 0 | 0 | 0 | 0 | 0 | 0 |
| 0 | 0 | 0 | 0 | 1 | 0 | 0 |
| 0 | 0 | 0 | 0 | 0 | 0 | 0 |
| 0 | 0 | 0 | 0 | 0 | 0 | 0 |
| 0 | 0 | 0 | 0 | 0 | 0 | 0 |
| 0 | 0 | 0 | 0 | 3 | 0 | 1 |
| 0 | 0 | 0 | 0 | 0 | 0 | 0 |
| 0 | 0 | 0 | 0 | 2 | 2 | 0 |
| 0 | 0 | 0 | 0 | 1 | 0 | 0 |
| 0 | 0 | 0 | 0 | 0 | 0 | 0 |
| 0 | 0 | 0 | 0 | 0 | 0 | 0 |
| 0 | 0 | 0 | 0 | 0 | 0 | 0 |



|   |   |   |   |   |   |   |
|---|---|---|---|---|---|---|
| 0 | 0 | 2 | 0 | 0 | 0 | 0 |
| 0 | 0 | 0 | 0 | 0 | 0 | 0 |
| 0 | 0 | 0 | 0 | 0 | 1 | 0 |
| 0 | 0 | 0 | 0 | 0 | 0 | 0 |
| 0 | 0 | 0 | 0 | 0 | 0 | 0 |
| 0 | 1 | 0 | 0 | 0 | 0 | 0 |
| 0 | 0 | 0 | 2 | 1 | 1 | 0 |
| 0 | 0 | 1 | 0 | 0 | 1 | 0 |
| 0 | 1 | 1 | 0 | 0 | 0 | 0 |
| 0 | 0 | 0 | 1 | 0 | 0 | 0 |
| 0 | 0 | 0 | 0 | 0 | 6 | 0 |
| 0 | 0 | 0 | 0 | 0 | 1 | 0 |
| 0 | 0 | 2 | 0 | 0 | 0 | 0 |
| 0 | 0 | 1 | 0 | 0 | 3 | 0 |
| 0 | 0 | 0 | 0 | 0 | 0 | 0 |
| 0 | 0 | 1 | 0 | 1 | 3 | 0 |
| 0 | 0 | 0 | 0 | 0 | 0 | 0 |
| 0 | 0 | 0 | 0 | 2 | 3 | 0 |
| 0 | 0 | 0 | 0 | 0 | 6 | 0 |
| 0 | 0 | 0 | 0 | 0 | 0 | 0 |
| 0 | 0 | 0 | 0 | 0 | 0 | 0 |
| 0 | 0 | 0 | 0 | 0 | 0 | 0 |
| 0 | 0 | 0 | 0 | 1 | 0 | 0 |
| 0 | 0 | 0 | 0 | 1 | 3 | 0 |
| 0 | 0 | 0 | 0 | 0 | 3 | 0 |
| 0 | 0 | 0 | 0 | 1 | 0 | 0 |
| 0 | 0 | 0 | 0 | 0 | 2 | 0 |
| 0 | 0 | 0 | 0 | 0 | 0 | 0 |
| 0 | 0 | 0 | 0 | 0 | 0 | 0 |







|   |   |   |   |   |   |   |
|---|---|---|---|---|---|---|
| 0 | 0 | 0 | 0 | 2 | 0 | 0 |
| 0 | 0 | 0 | 0 | 0 | 0 | 0 |
| 0 | 0 | 0 | 0 | 0 | 0 | 0 |
| 0 | 0 | 0 | 0 | 0 | 0 | 0 |
| 0 | 0 | 0 | 0 | 2 | 0 | 0 |
| 0 | 0 | 0 | 0 | 0 | 0 | 0 |
| 0 | 0 | 2 | 0 | 0 | 4 | 0 |
| 0 | 0 | 0 | 0 | 1 | 3 | 0 |
| 0 | 0 | 0 | 0 | 0 | 1 | 0 |
| 0 | 0 | 0 | 0 | 3 | 0 | 0 |
| 0 | 0 | 0 | 0 | 1 | 3 | 0 |
| 0 | 0 | 0 | 0 | 0 | 4 | 0 |
| 0 | 0 | 0 | 0 | 0 | 3 | 0 |
| 0 | 0 | 0 | 0 | 0 | 1 | 0 |
| 0 | 0 | 0 | 0 | 1 | 1 | 0 |
| 0 | 0 | 0 | 0 | 2 | 1 | 0 |
| 0 | 0 | 0 | 0 | 1 | 0 | 0 |
| 0 | 0 | 0 | 0 | 0 | 0 | 0 |
| 0 | 0 | 0 | 0 | 0 | 0 | 0 |
| 0 | 0 | 0 | 0 | 0 | 0 | 0 |
| 0 | 0 | 0 | 0 | 0 | 0 | 0 |
| 0 | 0 | 0 | 0 | 1 | 0 | 0 |
| 0 | 0 | 0 | 0 | 0 | 0 | 1 |
| 0 | 0 | 0 | 0 | 0 | 0 | 0 |
| 0 | 0 | 0 | 0 | 0 | 1 | 0 |
| 0 | 0 | 0 | 0 | 0 | 1 | 0 |
| 0 | 0 | 0 | 0 | 0 | 0 | 0 |
| 0 | 0 | 0 | 0 | 0 | 1 | 0 |
| 0 | 0 | 0 | 0 | 0 | 0 | 0 |
| 0 | 0 | 0 | 0 | 0 | 1 | 0 |
| 0 | 0 | 0 | 0 | 0 | 0 | 0 |

|   |   |   |   |   |   |   |
|---|---|---|---|---|---|---|
| 0 | 0 | 0 | 0 | 0 | 0 | 0 |
| 0 | 0 | 0 | 0 | 0 | 0 | 0 |
| 0 | 0 | 0 | 0 | 0 | 0 | 0 |
| 0 | 0 | 0 | 0 | 1 | 1 | 1 |
| 0 | 0 | 0 | 0 | 0 | 0 | 0 |
| 0 | 0 | 0 | 0 | 0 | 0 | 0 |
| 1 | 0 | 0 | 0 | 0 | 0 | 0 |
| 0 | 0 | 0 | 0 | 0 | 0 | 0 |
| 0 | 0 | 0 | 0 | 1 | 0 | 0 |
| 0 | 0 | 0 | 0 | 0 | 0 | 0 |
| 0 | 0 | 1 | 0 | 0 | 0 | 0 |
| 0 | 0 | 0 | 0 | 0 | 0 | 0 |
| 0 | 0 | 0 | 0 | 0 | 0 | 0 |
| 0 | 0 | 0 | 0 | 0 | 0 | 0 |
| 0 | 0 | 0 | 0 | 2 | 0 | 0 |
| 0 | 0 | 0 | 1 | 0 | 0 | 0 |
| 0 | 0 | 0 | 0 | 1 | 0 | 0 |
| 0 | 0 | 0 | 0 | 0 | 0 | 0 |
| 0 | 0 | 1 | 0 | 0 | 0 | 0 |
| 0 | 0 | 0 | 0 | 0 | 0 | 0 |
| 0 | 0 | 0 | 0 | 0 | 0 | 0 |
| 0 | 0 | 0 | 0 | 0 | 0 | 0 |
| 0 | 0 | 0 | 0 | 0 | 0 | 0 |
| 0 | 0 | 0 | 0 | 0 | 0 | 0 |
| 0 | 0 | 0 | 0 | 0 | 0 | 0 |
| 0 | 0 | 0 | 0 | 0 | 0 | 0 |
| 0 | 0 | 0 | 0 | 0 | 0 | 0 |
| 0 | 0 | 0 | 0 | 1 | 0 | 0 |
| 0 | 0 | 0 | 0 | 0 | 0 | 0 |
| 0 | 0 | 0 | 4 | 0 | 0 | 0 |
| 0 | 0 | 0 | 0 | 0 | 0 | 0 |

|   |   |   |   |                                |                                |   |
|---|---|---|---|--------------------------------|--------------------------------|---|
| 0 | 0 | 0 | 0 | <input type="text" value="1"/> | 0                              | 0 |
| 0 | 0 | 0 | 0 | 0                              | 0                              | 0 |
| 0 | 0 | 0 | 0 | 0                              | 0                              | 0 |
| 0 | 0 | 0 | 0 | 0                              | 0                              | 0 |
| 0 | 0 | 0 | 0 | 0                              | 0                              | 0 |
| 0 | 0 | 0 | 0 | 0                              | 0                              | 0 |
| 0 | 0 | 0 | 0 | 0                              | 0                              | 0 |
| 0 | 0 | 0 | 0 | 0                              | 0                              | 0 |
| 0 | 0 | 0 | 0 | 0                              | 0                              | 0 |
| 0 | 0 | 0 | 0 | 0                              | 0                              | 0 |
| 0 | 0 | 0 | 0 | 0                              | 0                              | 0 |
| 0 | 0 | 0 | 0 | 0                              | 0                              | 0 |
| 0 | 0 | 0 | 0 | 0                              | 0                              | 0 |
| 0 | 0 | 0 | 0 | 0                              | 0                              | 0 |
| 0 | 0 | 0 | 0 | 0                              | 0                              | 0 |
| 0 | 0 | 0 | 0 | 0                              | 0                              | 0 |
| 0 | 0 | 0 | 0 | 0                              | 0                              | 0 |
| 0 | 0 | 0 | 0 | 0                              | 0                              | 0 |
| 0 | 0 | 0 | 0 | 0                              | 0                              | 0 |
| 0 | 0 | 0 | 0 | 0                              | 0                              | 0 |
| 0 | 0 | 0 | 0 | 0                              | 0                              | 0 |
| 0 | 0 | 0 | 0 | 0                              | 0                              | 0 |
| 0 | 0 | 0 | 0 | 0                              | 0                              | 0 |
| 0 | 0 | 0 | 0 | 0                              | 0                              | 0 |
| 0 | 0 | 0 | 0 | 0                              | 0                              | 0 |
| 0 | 0 | 0 | 0 | 0                              | <input type="text" value="1"/> | 0 |
| 0 | 0 | 0 | 0 | 0                              | 0                              | 0 |
| 0 | 0 | 0 | 0 | 0                              | 0                              | 0 |
| 0 | 0 | 0 | 0 | 0                              | 0                              | 0 |
| 0 | 0 | 0 | 0 | 0                              | 0                              | 0 |
| 0 | 0 | 0 | 0 | 0                              | 0                              | 0 |
| 0 | 0 | 0 | 0 | 0                              | 0                              | 0 |
| 0 | 0 | 0 | 0 | 0                              | 0                              | 0 |
| 0 | 0 | 0 | 0 | 0                              | 0                              | 0 |
| 0 | 0 | 0 | 0 | 0                              | <input type="text" value="1"/> | 0 |
| 0 | 0 | 0 | 0 | 0                              | 0                              | 0 |

|   |   |   |   |   |   |   |
|---|---|---|---|---|---|---|
| 0 | 0 | 0 | 0 | 0 | 0 | 0 |
| 0 | 0 | 0 | 0 | 0 | 0 | 0 |
| 0 | 0 | 0 | 0 | 0 | 0 | 0 |
| 0 | 0 | 0 | 0 | 0 | 0 | 0 |
| 0 | 0 | 0 | 0 | 1 | 0 | 0 |
| 0 | 0 | 0 | 0 | 0 | 0 | 0 |
| 0 | 0 | 0 | 0 | 0 | 0 | 0 |
| 0 | 0 | 0 | 0 | 0 | 0 | 0 |
| 0 | 0 | 0 | 0 | 0 | 0 | 0 |
| 0 | 0 | 0 | 0 | 0 | 0 | 0 |
| 0 | 0 | 0 | 0 | 0 | 0 | 0 |
| 0 | 0 | 0 | 0 | 0 | 0 | 0 |
| 0 | 0 | 1 | 0 | 0 | 0 | 0 |
| 0 | 0 | 0 | 0 | 0 | 1 | 0 |
| 0 | 0 | 0 | 0 | 0 | 3 | 0 |
| 0 | 0 | 0 | 0 | 0 | 0 | 0 |
| 0 | 0 | 0 | 0 | 0 | 1 | 0 |
| 0 | 0 | 1 | 0 | 2 | 1 | 0 |
| 0 | 0 | 3 | 0 | 0 | 1 | 0 |
| 0 | 0 | 0 | 1 | 0 | 0 | 0 |
| 0 | 0 | 2 | 0 | 0 | 0 | 0 |
| 0 | 0 | 0 | 0 | 0 | 0 | 0 |
| 0 | 0 | 0 | 0 | 0 | 1 | 0 |
| 0 | 0 | 1 | 0 | 0 | 0 | 0 |
| 0 | 0 | 0 | 0 | 1 | 4 | 0 |
| 0 | 0 | 2 | 0 | 0 | 4 | 0 |
| 0 | 0 | 0 | 0 | 0 | 0 | 0 |
| 0 | 0 | 0 | 0 | 0 | 0 | 0 |
| 0 | 0 | 0 | 0 | 0 | 0 | 0 |

|   |   |   |   |   |   |   |
|---|---|---|---|---|---|---|
| 0 | 0 | 0 | 1 | 0 | 2 | 0 |
| 0 | 0 | 0 | 1 | 0 | 1 | 0 |
| 0 | 0 | 0 | 0 | 0 | 0 | 0 |
| 0 | 0 | 0 | 0 | 0 | 3 | 0 |
| 0 | 0 | 0 | 0 | 0 | 2 | 0 |
| 0 | 0 | 0 | 0 | 0 | 1 | 0 |
| 0 | 0 | 0 | 1 | 0 | 3 | 1 |
| 0 | 0 | 0 | 0 | 1 | 1 | 0 |
| 0 | 0 | 0 | 0 | 0 | 4 | 0 |
| 0 | 0 | 0 | 0 | 0 | 1 | 0 |
| 0 | 0 | 0 | 0 | 0 | 0 | 0 |
| 0 | 0 | 0 | 0 | 0 | 0 | 0 |
| 0 | 0 | 0 | 0 | 0 | 1 | 0 |
| 0 | 0 | 0 | 0 | 0 | 0 | 0 |
| 0 | 0 | 0 | 0 | 0 | 0 | 0 |
| 0 | 0 | 0 | 0 | 0 | 0 | 0 |
| 0 | 0 | 0 | 0 | 0 | 0 | 0 |
| 0 | 0 | 0 | 0 | 0 | 0 | 0 |
| 0 | 0 | 0 | 0 | 0 | 0 | 0 |
| 0 | 0 | 0 | 0 | 0 | 0 | 0 |
| 0 | 0 | 0 | 0 | 1 | 0 | 0 |
| 0 | 0 | 0 | 0 | 0 | 0 | 0 |
| 0 | 0 | 0 | 0 | 0 | 0 | 0 |
| 0 | 0 | 0 | 0 | 0 | 0 | 0 |
| 0 | 0 | 0 | 0 | 0 | 0 | 0 |
| 0 | 0 | 0 | 1 | 0 | 0 | 0 |

|   |   |   |   |   |   |   |
|---|---|---|---|---|---|---|
| 0 | 0 | 0 | 0 | 0 | 0 | 0 |
| 0 | 0 | 0 | 0 | 0 | 0 | 0 |
| 0 | 0 | 0 | 0 | 0 | 0 | 0 |
| 0 | 0 | 0 | 0 | 0 | 0 | 0 |
| 0 | 0 | 0 | 0 | 0 | 0 | 0 |
| 0 | 0 | 0 | 0 | 0 | 0 | 0 |
| 0 | 0 | 0 | 0 | 0 | 0 | 0 |
| 0 | 0 | 0 | 0 | 0 | 0 | 0 |
| 0 | 0 | 0 | 0 | 0 | 0 | 0 |
| 0 | 0 | 0 | 0 | 0 | 0 | 0 |
| 0 | 0 | 0 | 0 | 0 | 0 | 0 |
| 0 | 0 | 0 | 0 | 0 | 0 | 0 |
| 0 | 0 | 0 | 0 | 0 | 0 | 0 |
| 0 | 0 | 0 | 0 | 0 | 0 | 0 |
| 0 | 0 | 0 | 0 | 0 | 0 | 0 |
| 0 | 0 | 0 | 0 | 0 | 0 | 0 |
| 0 | 0 | 0 | 0 | 0 | 0 | 0 |
| 0 | 0 | 0 | 0 | 0 | 0 | 0 |
| 0 | 0 | 0 | 0 | 0 | 0 | 0 |
| 0 | 0 | 0 | 0 | 0 | 0 | 0 |
| 0 | 0 | 0 | 0 | 1 | 0 | 0 |
| 0 | 0 | 0 | 0 | 1 | 0 | 0 |
| 0 | 0 | 0 | 0 | 0 | 0 | 0 |
| 0 | 0 | 0 | 0 | 0 | 0 | 0 |
| 0 | 0 | 0 | 0 | 1 | 0 | 0 |
| 0 | 0 | 0 | 0 | 0 | 0 | 0 |
| 0 | 0 | 0 | 0 | 0 | 0 | 0 |
| 0 | 0 | 0 | 0 | 0 | 0 | 0 |
| 0 | 0 | 0 | 0 | 0 | 0 | 0 |



|   |   |   |   |   |   |   |
|---|---|---|---|---|---|---|
| 0 | 0 | 0 | 0 | 0 | 0 | 0 |
| 0 | 0 | 0 | 0 | 3 | 0 | 0 |
| 0 | 0 | 0 | 0 | 1 | 0 | 0 |
| 0 | 0 | 0 | 0 | 0 | 0 | 0 |
| 0 | 0 | 0 | 0 | 1 | 0 | 0 |
| 0 | 0 | 0 | 0 | 0 | 0 | 0 |
| 0 | 0 | 0 | 0 | 0 | 0 | 0 |
| 0 | 0 | 0 | 0 | 0 | 0 | 0 |
| 0 | 0 | 0 | 0 | 0 | 0 | 0 |
| 0 | 0 | 0 | 0 | 2 | 0 | 0 |
| 0 | 0 | 0 | 0 | 3 | 0 | 0 |
| 0 | 0 | 3 | 0 | 0 | 0 | 0 |
| 0 | 0 | 2 | 0 | 0 | 0 | 0 |
| 0 | 0 | 2 | 0 | 0 | 0 | 0 |
| 0 | 0 | 1 | 0 | 0 | 0 | 0 |
| 0 | 0 | 3 | 0 | 0 | 0 | 0 |
| 0 | 0 | 2 | 0 | 0 | 0 | 0 |
| 0 | 0 | 0 | 0 | 1 | 1 | 0 |
| 0 | 0 | 0 | 0 | 0 | 0 | 0 |
| 0 | 0 | 2 | 1 | 0 | 0 | 0 |
| 0 | 0 | 0 | 0 | 0 | 0 | 0 |
| 0 | 0 | 1 | 0 | 0 | 0 | 0 |
| 0 | 0 | 1 | 0 | 0 | 0 | 0 |
| 0 | 0 | 2 | 0 | 0 | 0 | 0 |
| 0 | 0 | 1 | 0 | 0 | 0 | 0 |
| 0 | 0 | 2 | 0 | 1 | 0 | 0 |
| 0 | 0 | 0 | 0 | 0 | 0 | 0 |
| 0 | 0 | 0 | 0 | 0 | 0 | 0 |
| 0 | 0 | 0 | 0 | 0 | 0 | 0 |

|   |   |   |                                |                                |   |   |
|---|---|---|--------------------------------|--------------------------------|---|---|
| 0 | 0 | 0 | <input type="text" value="1"/> | 0                              | 0 | 0 |
| 0 | 0 | 0 | 0                              | <input type="text" value="2"/> | 0 | 0 |
| 0 | 0 | 0 | 0                              | 0                              | 0 | 0 |
| 0 | 0 | 0 | 0                              | 0                              | 0 | 0 |
| 0 | 0 | 0 | 0                              | <input type="text" value="4"/> | 0 | 0 |
| 0 | 0 | 0 | 0                              | 0                              | 0 | 0 |
| 0 | 0 | 0 | 0                              | <input type="text" value="2"/> | 0 | 0 |
| 0 | 0 | 0 | 0                              | 0                              | 0 | 0 |
| 0 | 0 | 0 | 0                              | 0                              | 0 | 0 |
| 0 | 0 | 0 | 0                              | 0                              | 0 | 0 |
| 0 | 0 | 0 | 0                              | 0                              | 0 | 0 |
| 0 | 0 | 0 | 0                              | 0                              | 0 | 0 |
| 0 | 0 | 0 | 0                              | <input type="text" value="1"/> | 0 | 0 |
| 0 | 0 | 0 | 0                              | 0                              | 0 | 0 |

| pecaus | perval | phiaus | pholoe | phoron | phoxoc | phyllo | pinnov | plaaus | potest | priauc |    |
|--------|--------|--------|--------|--------|--------|--------|--------|--------|--------|--------|----|
| 0      | 0      | 0      | 0      | 0      | 0      | 0      | 0      | 0      | 0      | 0      | 1  |
| 0      | 0      | 0      | 0      | 0      | 0      | 0      | 0      | 0      | 0      | 0      | 16 |
| 0      | 0      | 0      | 0      | 0      | 0      | 0      | 0      | 0      | 0      | 0      | 5  |
| 0      | 0      | 0      | 0      | 0      | 0      | 0      | 0      | 0      | 0      | 0      | 9  |
| 0      | 0      | 0      | 0      | 0      | 0      | 0      | 0      | 0      | 0      | 0      | 3  |
| 0      | 0      | 0      | 0      | 0      | 0      | 0      | 0      | 0      | 0      | 0      | 1  |
| 0      | 0      | 0      | 0      | 0      | 0      | 0      | 0      | 0      | 0      | 0      | 2  |
| 0      | 0      | 0      | 0      | 0      | 0      | 0      | 0      | 0      | 0      | 0      | 2  |
| 0      | 0      | 0      | 0      | 0      | 0      | 0      | 0      | 0      | 0      | 0      | 0  |
| 0      | 0      | 0      | 0      | 0      | 0      | 0      | 0      | 0      | 0      | 0      | 0  |
| 0      | 0      | 0      | 0      | 0      | 1      | 0      | 0      | 0      | 0      | 0      | 0  |
| 0      | 0      | 0      | 0      | 0      | 2      | 0      | 0      | 0      | 0      | 0      | 0  |
| 0      | 0      | 0      | 0      | 0      | 2      | 0      | 0      | 0      | 0      | 0      | 0  |
| 0      | 0      | 0      | 0      | 0      | 0      | 0      | 0      | 0      | 0      | 0      | 0  |
| 0      | 0      | 0      | 0      | 0      | 0      | 0      | 0      | 0      | 0      | 0      | 0  |
| 0      | 0      | 0      | 0      | 0      | 1      | 0      | 0      | 0      | 0      | 0      | 0  |
| 0      | 0      | 0      | 0      | 0      | 1      | 0      | 0      | 0      | 0      | 0      | 0  |
| 0      | 0      | 0      | 0      | 0      | 0      | 0      | 0      | 0      | 0      | 0      | 0  |
| 0      | 0      | 0      | 0      | 0      | 3      | 0      | 0      | 0      | 0      | 0      | 0  |
| 0      | 0      | 0      | 0      | 0      | 2      | 0      | 0      | 0      | 1      | 0      | 0  |
| 0      | 0      | 0      | 0      | 0      | 1      | 0      | 0      | 0      | 0      | 0      | 0  |
| 0      | 0      | 0      | 0      | 0      | 3      | 0      | 0      | 0      | 0      | 0      | 0  |
| 0      | 0      | 0      | 0      | 0      | 0      | 0      | 0      | 0      | 0      | 0      | 5  |
| 0      | 0      | 0      | 0      | 0      | 0      | 0      | 0      | 0      | 0      | 0      | 11 |
| 0      | 0      | 0      | 0      | 0      | 0      | 0      | 0      | 0      | 2      | 0      | 12 |
| 0      | 0      | 0      | 0      | 0      | 0      | 0      | 0      | 0      | 0      | 0      | 0  |
| 0      | 0      | 0      | 0      | 0      | 1      | 0      | 0      | 0      | 0      | 0      | 0  |
| 0      | 0      | 1      | 0      | 0      | 6      | 0      | 0      | 0      | 0      | 0      | 0  |

|   |   |   |   |   |   |   |   |   |   |   |
|---|---|---|---|---|---|---|---|---|---|---|
| 0 | 0 | 0 | 0 | 0 | 0 | 0 | 0 | 0 | 0 | 0 |
| 0 | 0 | 0 | 0 | 0 | 0 | 0 | 0 | 0 | 0 | 0 |
| 0 | 0 | 0 | 0 | 1 | 0 | 0 | 0 | 0 | 0 | 0 |
| 0 | 0 | 0 | 0 | 0 | 0 | 0 | 0 | 0 | 0 | 1 |
| 0 | 0 | 0 | 0 | 0 | 0 | 0 | 0 | 1 | 0 | 1 |
| 0 | 0 | 0 | 0 | 1 | 0 | 0 | 0 | 0 | 0 | 0 |
| 0 | 0 | 0 | 0 | 0 | 0 | 0 | 0 | 0 | 0 | 0 |
| 0 | 0 | 0 | 0 | 2 | 0 | 0 | 0 | 1 | 0 | 0 |
| 0 | 0 | 0 | 0 | 0 | 0 | 0 | 0 | 0 | 0 | 4 |
| 0 | 0 | 0 | 0 | 0 | 4 | 0 | 0 | 0 | 0 | 0 |
| 0 | 0 | 0 | 0 | 0 | 0 | 0 | 0 | 1 | 0 | 1 |
| 0 | 0 | 1 | 0 | 0 | 0 | 0 | 0 | 0 | 0 | 0 |
| 0 | 0 | 0 | 0 | 0 | 0 | 0 | 0 | 0 | 0 | 0 |
| 0 | 0 | 0 | 0 | 1 | 0 | 0 | 0 | 0 | 0 | 0 |
| 0 | 2 | 0 | 0 | 0 | 0 | 0 | 0 | 0 | 0 | 1 |
| 0 | 0 | 0 | 0 | 0 | 0 | 0 | 0 | 0 | 0 | 1 |
| 0 | 0 | 0 | 0 | 0 | 0 | 0 | 0 | 1 | 0 | 4 |
| 0 | 0 | 0 | 0 | 0 | 0 | 0 | 0 | 1 | 0 | 7 |
| 0 | 0 | 1 | 0 | 0 | 2 | 0 | 0 | 1 | 0 | 2 |
| 0 | 0 | 0 | 0 | 0 | 0 | 0 | 0 | 1 | 0 | 3 |
| 0 | 0 | 1 | 0 | 0 | 0 | 0 | 0 | 0 | 0 | 1 |
| 0 | 0 | 0 | 0 | 3 | 0 | 0 | 0 | 0 | 0 | 0 |
| 0 | 0 | 0 | 0 | 2 | 0 | 0 | 0 | 0 | 0 | 0 |
| 0 | 0 | 0 | 0 | 2 | 0 | 0 | 0 | 0 | 0 | 0 |
| 0 | 0 | 0 | 0 | 2 | 0 | 0 | 0 | 0 | 0 | 0 |
| 0 | 0 | 0 | 0 | 2 | 0 | 0 | 0 | 0 | 0 | 0 |
| 0 | 0 | 0 | 0 | 3 | 0 | 0 | 0 | 0 | 0 | 1 |
| 0 | 0 | 1 | 0 | 2 | 0 | 0 | 0 | 0 | 0 | 0 |
| 0 | 0 | 0 | 0 | 2 | 0 | 0 | 0 | 0 | 0 | 1 |



|   |   |   |   |    |   |   |   |   |   |   |
|---|---|---|---|----|---|---|---|---|---|---|
| 0 | 0 | 0 | 0 | 3  | 0 | 0 | 0 | 2 | 0 | 0 |
| 0 | 0 | 0 | 0 | 2  | 0 | 0 | 0 | 1 | 0 | 0 |
| 0 | 0 | 0 | 0 | 3  | 0 | 0 | 0 | 2 | 0 | 0 |
| 1 | 0 | 0 | 0 | 3  | 0 | 0 | 0 | 2 | 0 | 0 |
| 0 | 0 | 0 | 0 | 0  | 0 | 0 | 0 | 0 | 0 | 1 |
| 0 | 0 | 0 | 0 | 0  | 0 | 0 | 0 | 0 | 0 | 1 |
| 0 | 0 | 0 | 0 | 0  | 0 | 0 | 0 | 0 | 0 | 1 |
| 0 | 0 | 0 | 0 | 0  | 1 | 0 | 0 | 0 | 0 | 0 |
| 0 | 0 | 0 | 0 | 9  | 0 | 0 | 0 | 0 | 0 | 0 |
| 0 | 0 | 0 | 0 | 3  | 0 | 0 | 0 | 0 | 0 | 0 |
| 0 | 0 | 1 | 0 | 6  | 0 | 0 | 0 | 0 | 0 | 0 |
| 0 | 0 | 0 | 0 | 5  | 0 | 0 | 0 | 0 | 0 | 0 |
| 0 | 0 | 0 | 0 | 12 | 0 | 0 | 0 | 0 | 0 | 0 |
| 0 | 0 | 0 | 0 | 0  | 0 | 0 | 0 | 0 | 0 | 0 |
| 0 | 0 | 0 | 0 | 0  | 0 | 0 | 0 | 0 | 0 | 8 |
| 0 | 0 | 0 | 0 | 0  | 0 | 0 | 0 | 0 | 0 | 0 |
| 0 | 1 | 0 | 0 | 0  | 0 | 0 | 0 | 0 | 0 | 0 |
| 0 | 0 | 0 | 0 | 0  | 0 | 0 | 0 | 0 | 0 | 1 |
| 0 | 0 | 0 | 0 | 0  | 0 | 0 | 0 | 0 | 0 | 0 |
| 0 | 0 | 0 | 0 | 0  | 0 | 0 | 0 | 1 | 0 | 1 |
| 0 | 0 | 0 | 0 | 0  | 0 | 0 | 0 | 0 | 0 | 0 |
| 0 | 0 | 0 | 0 | 3  | 0 | 0 | 0 | 0 | 0 | 0 |
| 0 | 0 | 0 | 0 | 2  | 0 | 0 | 0 | 1 | 0 | 0 |
| 0 | 0 | 0 | 0 | 2  | 0 | 0 | 0 | 2 | 0 | 0 |
| 0 | 0 | 0 | 0 | 2  | 0 | 0 | 0 | 9 | 0 | 0 |
| 0 | 0 | 0 | 0 | 2  | 0 | 0 | 0 | 1 | 0 | 0 |
| 0 | 0 | 0 | 0 | 5  | 0 | 0 | 0 | 0 | 0 | 0 |
| 0 | 0 | 0 | 0 | 2  | 0 | 0 | 0 | 0 | 0 | 0 |
| 0 | 0 | 0 | 0 | 12 | 0 | 0 | 0 | 2 | 0 | 0 |











|   |   |   |   |   |   |   |   |   |   |   |
|---|---|---|---|---|---|---|---|---|---|---|
| 0 | 0 | 0 | 0 | 0 | 0 | 0 | 0 | 0 | 0 | 0 |
| 0 | 0 | 0 | 0 | 0 | 0 | 0 | 0 | 0 | 0 | 0 |
| 0 | 0 | 0 | 0 | 0 | 0 | 0 | 0 | 0 | 0 | 0 |
| 0 | 0 | 0 | 0 | 0 | 0 | 0 | 0 | 0 | 0 | 0 |
| 0 | 0 | 0 | 0 | 0 | 0 | 0 | 0 | 0 | 0 | 0 |
| 0 | 2 | 0 | 0 | 0 | 0 | 0 | 0 | 0 | 0 | 0 |
| 0 | 1 | 0 | 0 | 0 | 0 | 0 | 0 | 0 | 0 | 0 |
| 0 | 0 | 0 | 0 | 0 | 0 | 0 | 0 | 0 | 0 | 0 |
| 0 | 0 | 0 | 0 | 0 | 0 | 0 | 0 | 0 | 0 | 0 |
| 0 | 0 | 0 | 0 | 0 | 0 | 0 | 0 | 0 | 0 | 1 |
| 0 | 0 | 0 | 0 | 0 | 0 | 0 | 0 | 0 | 0 | 0 |
| 0 | 1 | 0 | 0 | 0 | 0 | 0 | 0 | 0 | 0 | 0 |
| 0 | 0 | 0 | 0 | 0 | 0 | 0 | 0 | 0 | 0 | 0 |
| 0 | 0 | 0 | 0 | 0 | 0 | 0 | 0 | 0 | 0 | 0 |
| 0 | 0 | 0 | 0 | 0 | 0 | 0 | 0 | 0 | 0 | 0 |
| 0 | 0 | 0 | 0 | 0 | 0 | 0 | 0 | 0 | 0 | 0 |
| 0 | 0 | 0 | 0 | 0 | 0 | 0 | 0 | 0 | 0 | 1 |
| 0 | 0 | 0 | 0 | 0 | 0 | 0 | 0 | 0 | 0 | 0 |
| 0 | 0 | 0 | 0 | 0 | 0 | 0 | 0 | 0 | 0 | 0 |
| 0 | 0 | 1 | 0 | 0 | 0 | 0 | 0 | 0 | 0 | 0 |
| 0 | 0 | 0 | 0 | 0 | 0 | 0 | 0 | 0 | 0 | 1 |
| 0 | 0 | 0 | 0 | 0 | 0 | 0 | 0 | 0 | 0 | 0 |
| 0 | 0 | 0 | 0 | 0 | 0 | 0 | 0 | 0 | 0 | 0 |
| 0 | 0 | 0 | 0 | 1 | 0 | 0 | 0 | 0 | 0 | 5 |
| 0 | 0 | 0 | 0 | 0 | 0 | 1 | 0 | 0 | 0 | 0 |
| 0 | 0 | 0 | 0 | 0 | 0 | 0 | 0 | 0 | 0 | 3 |
| 0 | 0 | 0 | 0 | 0 | 0 | 0 | 0 | 0 | 0 | 0 |
| 0 | 0 | 2 | 0 | 0 | 0 | 0 | 0 | 0 | 0 | 0 |

|   |   |   |   |    |   |   |   |   |   |   |
|---|---|---|---|----|---|---|---|---|---|---|
| 0 | 0 | 3 | 0 | 1  | 0 | 0 | 0 | 1 | 0 | 1 |
| 0 | 0 | 0 | 0 | 1  | 0 | 0 | 0 | 0 | 0 | 2 |
| 0 | 0 | 0 | 0 | 0  | 0 | 0 | 0 | 1 | 0 | 0 |
| 0 | 0 | 0 | 0 | 3  | 0 | 0 | 0 | 0 | 0 | 1 |
| 0 | 0 | 0 | 0 | 1  | 0 | 0 | 0 | 0 | 0 | 0 |
| 0 | 0 | 0 | 0 | 0  | 0 | 0 | 0 | 0 | 0 | 0 |
| 0 | 0 | 0 | 0 | 0  | 0 | 0 | 0 | 1 | 0 | 0 |
| 0 | 0 | 0 | 0 | 0  | 0 | 0 | 0 | 0 | 0 | 2 |
| 0 | 0 | 0 | 0 | 3  | 0 | 0 | 0 | 1 | 1 | 0 |
| 0 | 0 | 0 | 0 | 0  | 0 | 0 | 0 | 0 | 0 | 0 |
| 0 | 0 | 0 | 0 | 1  | 0 | 0 | 0 | 0 | 0 | 0 |
| 0 | 0 | 0 | 0 | 5  | 0 | 0 | 0 | 0 | 0 | 0 |
| 0 | 0 | 0 | 0 | 0  | 0 | 0 | 0 | 0 | 0 | 0 |
| 1 | 0 | 0 | 0 | 0  | 0 | 0 | 0 | 0 | 0 | 0 |
| 1 | 0 | 0 | 0 | 0  | 0 | 0 | 0 | 0 | 0 | 0 |
| 0 | 0 | 0 | 0 | 7  | 0 | 0 | 0 | 0 | 0 | 0 |
| 0 | 0 | 0 | 0 | 7  | 0 | 0 | 0 | 0 | 0 | 0 |
| 0 | 1 | 0 | 0 | 4  | 0 | 0 | 0 | 0 | 0 | 1 |
| 0 | 0 | 0 | 0 | 4  | 0 | 0 | 0 | 0 | 0 | 0 |
| 0 | 0 | 0 | 0 | 10 | 0 | 0 | 0 | 0 | 0 | 0 |
| 0 | 0 | 0 | 0 | 17 | 0 | 0 | 0 | 0 | 0 | 0 |
| 0 | 0 | 0 | 0 | 8  | 0 | 0 | 0 | 0 | 0 | 0 |
| 0 | 0 | 0 | 0 | 6  | 0 | 0 | 0 | 0 | 0 | 0 |
| 0 | 0 | 0 | 0 | 2  | 0 | 0 | 0 | 0 | 0 | 0 |
| 0 | 0 | 0 | 0 | 2  | 0 | 0 | 0 | 0 | 0 | 0 |
| 0 | 0 | 0 | 0 | 4  | 0 | 0 | 0 | 1 | 0 | 0 |
| 0 | 0 | 0 | 0 | 1  | 0 | 0 | 0 | 1 | 0 | 0 |
| 0 | 0 | 2 | 0 | 1  | 0 | 0 | 0 | 1 | 0 | 0 |
| 0 | 0 | 0 | 0 | 3  | 0 | 0 | 0 | 0 | 0 | 1 |

|   |   |   |   |    |   |   |   |   |   |   |   |
|---|---|---|---|----|---|---|---|---|---|---|---|
| 0 | 0 | 0 | 0 | 3  | 0 | 0 | 0 | 0 | 0 | 0 | 0 |
| 0 | 0 | 0 | 0 | 4  | 0 | 0 | 0 | 0 | 0 | 0 | 0 |
| 0 | 0 | 0 | 0 | 0  | 0 | 0 | 0 | 0 | 0 | 0 | 0 |
| 0 | 0 | 0 | 0 | 1  | 0 | 0 | 0 | 0 | 0 | 0 | 0 |
| 0 | 0 | 0 | 0 | 12 | 0 | 0 | 0 | 0 | 0 | 0 | 1 |
| 0 | 0 | 0 | 0 | 2  | 0 | 0 | 0 | 0 | 0 | 0 | 0 |
| 0 | 0 | 0 | 0 | 3  | 0 | 0 | 0 | 0 | 0 | 0 | 0 |
| 0 | 0 | 0 | 0 | 2  | 0 | 0 | 0 | 0 | 0 | 0 | 0 |
| 0 | 0 | 0 | 0 | 2  | 0 | 0 | 0 | 0 | 0 | 0 | 0 |
| 0 | 0 | 0 | 0 | 3  | 0 | 0 | 0 | 0 | 0 | 0 | 0 |
| 0 | 0 | 0 | 0 | 3  | 0 | 0 | 0 | 0 | 0 | 0 | 0 |
| 0 | 0 | 0 | 0 | 1  | 0 | 0 | 0 | 0 | 0 | 0 | 0 |
| 0 | 0 | 0 | 0 | 1  | 0 | 0 | 0 | 0 | 0 | 0 | 1 |
| 0 | 0 | 0 | 0 | 0  | 0 | 0 | 1 | 0 | 0 | 0 | 0 |
| 0 | 0 | 0 | 0 | 2  | 0 | 0 | 0 | 0 | 0 | 0 | 0 |
| 0 | 0 | 0 | 0 | 4  | 0 | 0 | 0 | 0 | 0 | 0 | 0 |
| 0 | 0 | 0 | 0 | 3  | 0 | 0 | 0 | 0 | 0 | 0 | 0 |
| 0 | 0 | 0 | 0 | 2  | 0 | 0 | 0 | 0 | 0 | 0 | 0 |
| 0 | 0 | 0 | 0 | 1  | 0 | 0 | 0 | 0 | 0 | 0 | 0 |
| 0 | 0 | 0 | 0 | 1  | 0 | 0 | 0 | 0 | 0 | 0 | 0 |
| 0 | 0 | 0 | 0 | 0  | 0 | 0 | 0 | 0 | 0 | 0 | 0 |
| 1 | 0 | 0 | 0 | 1  | 0 | 0 | 0 | 0 | 0 | 0 | 0 |
| 0 | 0 | 0 | 0 | 1  | 0 | 0 | 0 | 0 | 0 | 0 | 0 |
| 1 | 0 | 0 | 0 | 2  | 0 | 0 | 0 | 0 | 0 | 0 | 0 |
| 0 | 0 | 1 | 0 | 1  | 0 | 0 | 0 | 0 | 0 | 0 | 0 |
| 0 | 0 | 0 | 0 | 3  | 0 | 0 | 0 | 0 | 0 | 0 | 0 |
| 0 | 0 | 1 | 0 | 1  | 0 | 0 | 0 | 0 | 0 | 0 | 0 |
| 0 | 0 | 0 | 0 | 0  | 0 | 0 | 0 | 0 | 0 | 0 | 0 |
| 0 | 0 | 0 | 0 | 3  | 0 | 0 | 0 | 0 | 0 | 0 | 0 |





|   |   |   |   |   |   |   |   |   |   |   |   |
|---|---|---|---|---|---|---|---|---|---|---|---|
| 0 | 0 | 0 | 0 | 0 | 0 | 0 | 0 | 0 | 1 | 0 | 0 |
| 0 | 1 | 0 | 0 | 0 | 0 | 0 | 0 | 0 | 0 | 0 | 0 |
| 0 | 0 | 0 | 0 | 0 | 0 | 0 | 0 | 0 | 0 | 0 | 0 |
| 0 | 0 | 0 | 0 | 0 | 0 | 0 | 0 | 0 | 0 | 0 | 0 |
| 0 | 0 | 0 | 0 | 0 | 0 | 0 | 0 | 0 | 0 | 0 | 0 |
| 0 | 1 | 0 | 0 | 0 | 0 | 0 | 0 | 0 | 0 | 0 | 0 |
| 0 | 0 | 0 | 0 | 0 | 0 | 0 | 0 | 0 | 0 | 0 | 0 |
| 0 | 0 | 0 | 0 | 0 | 0 | 0 | 0 | 0 | 0 | 0 | 0 |
| 0 | 1 | 0 | 0 | 0 | 0 | 0 | 0 | 0 | 0 | 0 | 0 |
| 0 | 0 | 0 | 0 | 0 | 0 | 0 | 0 | 0 | 0 | 0 | 0 |
| 0 | 0 | 0 | 0 | 0 | 0 | 0 | 0 | 0 | 0 | 0 | 0 |
| 0 | 0 | 0 | 0 | 0 | 0 | 0 | 0 | 0 | 0 | 0 | 0 |
| 0 | 0 | 0 | 0 | 0 | 0 | 0 | 0 | 0 | 0 | 0 | 0 |
| 0 | 0 | 0 | 0 | 0 | 0 | 0 | 0 | 0 | 0 | 0 | 0 |
| 0 | 0 | 0 | 0 | 0 | 0 | 0 | 0 | 0 | 0 | 0 | 0 |
| 0 | 0 | 0 | 0 | 0 | 0 | 1 | 0 | 0 | 0 | 0 | 0 |
| 0 | 0 | 0 | 0 | 0 | 0 | 0 | 0 | 0 | 0 | 0 | 0 |
| 0 | 0 | 0 | 0 | 0 | 0 | 0 | 0 | 0 | 0 | 0 | 0 |
| 0 | 0 | 0 | 0 | 0 | 0 | 0 | 0 | 0 | 0 | 0 | 0 |
| 0 | 0 | 0 | 0 | 0 | 0 | 0 | 0 | 0 | 0 | 0 | 0 |
| 0 | 0 | 0 | 0 | 0 | 0 | 0 | 0 | 0 | 0 | 0 | 0 |
| 0 | 0 | 0 | 0 | 0 | 0 | 0 | 0 | 0 | 0 | 0 | 1 |
| 0 | 0 | 0 | 0 | 0 | 0 | 0 | 0 | 0 | 0 | 0 | 1 |

|        |        |        |        |        |        |        |        |        |        |        |   |
|--------|--------|--------|--------|--------|--------|--------|--------|--------|--------|--------|---|
| polydo | priauc | protoh | psefat | psethi | sabell | scoben | scocyl | scolel | signov | solpar |   |
| 0      | 0      | 0      | 0      | 0      | 0      | 0      | 0      | 0      | 0      | 0      | 0 |
| 0      | 2      | 0      | 0      | 0      | 0      | 0      | 0      | 0      | 5      | 0      | 0 |
| 0      | 0      | 0      | 0      | 0      | 0      | 0      | 0      | 0      | 0      | 0      | 0 |
| 0      | 0      | 0      | 0      | 0      | 0      | 0      | 1      | 0      | 0      | 0      | 0 |





|   |    |   |   |   |   |   |   |   |   |   |
|---|----|---|---|---|---|---|---|---|---|---|
| 0 | 0  | 0 | 0 | 0 | 0 | 0 | 0 | 0 | 0 | 0 |
| 0 | 0  | 0 | 0 | 0 | 0 | 0 | 0 | 0 | 0 | 0 |
| 0 | 1  | 0 | 0 | 0 | 0 | 0 | 0 | 0 | 0 | 0 |
| 0 | 0  | 0 | 0 | 0 | 0 | 0 | 0 | 0 | 0 | 0 |
| 0 | 2  | 0 | 0 | 0 | 0 | 0 | 0 | 0 | 0 | 0 |
| 0 | 2  | 0 | 0 | 0 | 0 | 0 | 0 | 0 | 0 | 0 |
| 0 | 11 | 0 | 0 | 0 | 0 | 0 | 0 | 0 | 0 | 0 |
| 0 | 3  | 0 | 0 | 0 | 0 | 0 | 0 | 0 | 0 | 0 |
| 0 | 5  | 0 | 0 | 0 | 0 | 0 | 0 | 0 | 0 | 0 |
| 0 | 2  | 0 | 0 | 0 | 0 | 0 | 0 | 0 | 0 | 0 |
| 0 | 3  | 0 | 0 | 0 | 0 | 0 | 0 | 0 | 0 | 0 |
| 0 | 3  | 0 | 0 | 0 | 0 | 0 | 0 | 0 | 0 | 0 |
| 0 | 3  | 0 | 0 | 0 | 0 | 0 | 0 | 0 | 0 | 0 |
| 0 | 4  | 0 | 0 | 0 | 0 | 0 | 0 | 0 | 0 | 0 |
| 0 | 5  | 0 | 0 | 0 | 0 | 0 | 0 | 0 | 0 | 0 |
| 0 | 1  | 0 | 1 | 0 | 0 | 0 | 0 | 0 | 0 | 0 |
| 0 | 2  | 0 | 0 | 0 | 0 | 0 | 0 | 0 | 0 | 0 |
| 0 | 5  | 0 | 0 | 0 | 0 | 0 | 0 | 0 | 0 | 0 |
| 0 | 7  | 0 | 0 | 0 | 0 | 0 | 0 | 0 | 0 | 0 |
| 0 | 8  | 0 | 0 | 0 | 0 | 0 | 0 | 0 | 0 | 0 |
| 0 | 15 | 0 | 0 | 0 | 0 | 0 | 0 | 0 | 0 | 0 |
| 0 | 21 | 0 | 0 | 0 | 0 | 0 | 0 | 0 | 0 | 0 |
| 1 | 4  | 0 | 2 | 0 | 0 | 0 | 0 | 0 | 0 | 0 |
| 0 | 15 | 0 | 0 | 0 | 0 | 0 | 0 | 0 | 0 | 0 |
| 0 | 8  | 0 | 1 | 0 | 0 | 1 | 0 | 0 | 0 | 0 |
| 0 | 5  | 0 | 0 | 0 | 0 | 0 | 0 | 0 | 0 | 0 |
| 0 | 0  | 0 | 0 | 0 | 0 | 0 | 0 | 0 | 0 | 0 |
| 3 | 21 | 0 | 0 | 0 | 0 | 1 | 0 | 0 | 0 | 0 |
| 0 | 14 | 0 | 0 | 1 | 0 | 1 | 0 | 0 | 0 | 0 |





|   |    |   |   |   |   |   |   |   |   |   |
|---|----|---|---|---|---|---|---|---|---|---|
| 0 | 0  | 0 | 0 | 0 | 0 | 0 | 0 | 0 | 0 | 0 |
| 0 | 1  | 0 | 0 | 0 | 0 | 0 | 0 | 0 | 0 | 0 |
| 0 | 1  | 0 | 0 | 0 | 0 | 0 | 0 | 0 | 0 | 0 |
| 0 | 1  | 0 | 0 | 0 | 0 | 0 | 0 | 0 | 0 | 0 |
| 0 | 2  | 0 | 1 | 0 | 0 | 0 | 0 | 0 | 0 | 0 |
| 0 | 5  | 0 | 0 | 0 | 0 | 0 | 0 | 0 | 0 | 0 |
| 0 | 6  | 0 | 0 | 0 | 0 | 0 | 0 | 0 | 0 | 0 |
| 0 | 2  | 0 | 0 | 0 | 0 | 0 | 0 | 0 | 0 | 0 |
| 0 | 2  | 0 | 1 | 0 | 0 | 0 | 0 | 0 | 0 | 0 |
| 0 | 4  | 0 | 0 | 0 | 0 | 0 | 0 | 0 | 0 | 0 |
| 0 | 2  | 0 | 0 | 0 | 0 | 0 | 0 | 0 | 0 | 0 |
| 0 | 1  | 0 | 0 | 0 | 0 | 0 | 0 | 0 | 0 | 0 |
| 0 | 6  | 0 | 1 | 0 | 0 | 0 | 0 | 0 | 0 | 0 |
| 0 | 8  | 0 | 1 | 0 | 0 | 0 | 0 | 0 | 0 | 0 |
| 0 | 1  | 0 | 0 | 0 | 0 | 0 | 0 | 0 | 0 | 0 |
| 0 | 9  | 0 | 0 | 0 | 0 | 0 | 0 | 0 | 0 | 0 |
| 0 | 4  | 0 | 0 | 0 | 0 | 0 | 0 | 0 | 0 | 0 |
| 0 | 7  | 0 | 0 | 0 | 0 | 0 | 0 | 0 | 0 | 0 |
| 0 | 4  | 0 | 0 | 0 | 0 | 0 | 0 | 0 | 0 | 0 |
| 0 | 17 | 0 | 0 | 0 | 0 | 0 | 0 | 0 | 0 | 0 |
| 0 | 2  | 0 | 0 | 0 | 0 | 0 | 0 | 0 | 0 | 0 |
| 0 | 0  | 0 | 0 | 0 | 0 | 0 | 0 | 0 | 0 | 0 |
| 0 | 1  | 0 | 0 | 0 | 0 | 0 | 0 | 0 | 0 | 0 |
| 0 | 2  | 0 | 1 | 0 | 0 | 0 | 0 | 0 | 0 | 0 |
| 0 | 17 | 0 | 0 | 0 | 0 | 0 | 0 | 0 | 0 | 0 |
| 0 | 0  | 0 | 0 | 0 | 0 | 0 | 0 | 0 | 0 | 0 |
| 0 | 0  | 0 | 0 | 0 | 0 | 0 | 0 | 0 | 0 | 0 |
| 1 | 3  | 0 | 1 | 0 | 0 | 0 | 0 | 0 | 0 | 0 |
| 0 | 1  | 0 | 2 | 0 | 0 | 0 | 0 | 0 | 0 | 0 |





















































| protoh | psefat | psethi | scalib | scoben | scocyl | scolel | solpar | solsil | squarm | thelub |   |
|--------|--------|--------|--------|--------|--------|--------|--------|--------|--------|--------|---|
| 0      | 0      | 0      | 0      | 0      | 0      | 0      | 0      | 0      | 7      | 0      | 0 |
| 0      | 0      | 0      | 0      | 0      | 0      | 0      | 0      | 0      | 1      | 0      | 0 |
| 0      | 0      | 0      | 0      | 0      | 0      | 0      | 0      | 0      | 4      | 0      | 0 |
| 0      | 0      | 0      | 0      | 0      | 0      | 0      | 0      | 0      | 5      | 0      | 0 |
| 0      | 0      | 0      | 0      | 0      | 1      | 0      | 0      | 0      | 0      | 0      | 0 |
| 0      | 0      | 0      | 0      | 0      | 0      | 0      | 0      | 0      | 0      | 0      | 0 |
| 0      | 0      | 0      | 0      | 0      | 0      | 0      | 0      | 0      | 7      | 0      | 0 |
| 0      | 0      | 0      | 0      | 0      | 0      | 0      | 0      | 0      | 0      | 0      | 0 |
| 0      | 0      | 0      | 0      | 0      | 0      | 0      | 0      | 0      | 0      | 0      | 0 |
| 0      | 0      | 0      | 0      | 0      | 0      | 0      | 0      | 0      | 1      | 0      | 0 |
| 0      | 1      | 0      | 0      | 0      | 0      | 0      | 0      | 0      | 1      | 0      | 0 |
| 0      | 1      | 0      | 0      | 0      | 0      | 0      | 0      | 0      | 0      | 0      | 0 |
| 0      | 0      | 0      | 0      | 0      | 0      | 0      | 0      | 0      | 1      | 0      | 0 |
| 0      | 0      | 0      | 0      | 0      | 0      | 0      | 0      | 0      | 0      | 0      | 0 |
| 0      | 0      | 0      | 0      | 0      | 0      | 0      | 0      | 0      | 1      | 0      | 0 |
| 0      | 0      | 0      | 0      | 0      | 0      | 0      | 0      | 0      | 0      | 0      | 0 |
| 0      | 0      | 0      | 0      | 0      | 0      | 0      | 0      | 0      | 8      | 0      | 0 |
| 0      | 0      | 0      | 0      | 0      | 0      | 0      | 0      | 0      | 0      | 0      | 0 |
| 0      | 0      | 0      | 0      | 0      | 0      | 0      | 0      | 0      | 0      | 0      | 0 |
| 0      | 0      | 0      | 0      | 0      | 0      | 0      | 0      | 0      | 0      | 0      | 0 |
| 0      | 0      | 0      | 0      | 0      | 0      | 0      | 0      | 0      | 0      | 0      | 0 |
| 0      | 0      | 0      | 0      | 0      | 0      | 0      | 0      | 0      | 1      | 0      | 0 |
| 0      | 0      | 0      | 0      | 0      | 0      | 0      | 0      | 0      | 10     | 0      | 0 |
| 0      | 0      | 0      | 0      | 0      | 0      | 0      | 0      | 0      | 8      | 0      | 0 |
| 0      | 0      | 0      | 0      | 1      | 0      | 0      | 0      | 0      | 0      | 0      | 1 |
| 0      | 0      | 0      | 0      | 0      | 0      | 0      | 0      | 0      | 0      | 0      | 0 |
| 0      | 0      | 0      | 0      | 0      | 0      | 0      | 0      | 0      | 0      | 0      | 0 |
| 0      | 0      | 0      | 0      | 0      | 0      | 0      | 0      | 0      | 1      | 0      | 0 |

|   |   |   |   |   |   |   |   |    |   |   |
|---|---|---|---|---|---|---|---|----|---|---|
| 0 | 0 | 0 | 0 | 0 | 0 | 0 | 0 | 0  | 0 | 0 |
| 0 | 0 | 0 | 0 | 0 | 0 | 0 | 0 | 0  | 0 | 0 |
| 0 | 1 | 0 | 0 | 0 | 0 | 0 | 0 | 0  | 0 | 0 |
| 0 | 0 | 0 | 0 | 0 | 0 | 0 | 0 | 0  | 0 | 0 |
| 0 | 0 | 0 | 0 | 0 | 0 | 0 | 0 | 0  | 0 | 0 |
| 0 | 0 | 0 | 0 | 0 | 0 | 0 | 0 | 0  | 0 | 0 |
| 0 | 0 | 0 | 0 | 0 | 0 | 0 | 0 | 0  | 0 | 0 |
| 0 | 0 | 0 | 0 | 0 | 0 | 0 | 0 | 0  | 0 | 0 |
| 0 | 0 | 0 | 0 | 0 | 0 | 0 | 0 | 0  | 0 | 0 |
| 0 | 1 | 0 | 0 | 0 | 0 | 0 | 0 | 0  | 0 | 0 |
| 0 | 1 | 0 | 0 | 1 | 0 | 0 | 0 | 0  | 0 | 0 |
| 0 | 3 | 0 | 0 | 0 | 0 | 0 | 0 | 0  | 0 | 0 |
| 0 | 5 | 0 | 0 | 0 | 0 | 0 | 0 | 0  | 0 | 0 |
| 0 | 1 | 0 | 0 | 0 | 0 | 0 | 0 | 2  | 0 | 0 |
| 0 | 0 | 0 | 1 | 0 | 0 | 0 | 0 | 7  | 0 | 0 |
| 0 | 0 | 0 | 0 | 1 | 0 | 0 | 0 | 22 | 0 | 0 |
| 0 | 1 | 1 | 3 | 0 | 0 | 0 | 0 | 0  | 0 | 0 |
| 0 | 0 | 0 | 0 | 0 | 0 | 0 | 0 | 3  | 0 | 0 |
| 0 | 0 | 0 | 0 | 0 | 0 | 0 | 0 | 0  | 0 | 0 |
| 0 | 0 | 0 | 0 | 0 | 0 | 0 | 0 | 0  | 0 | 0 |
| 0 | 0 | 0 | 0 | 0 | 0 | 0 | 0 | 2  | 0 | 0 |
| 0 | 0 | 0 | 0 | 0 | 0 | 0 | 0 | 0  | 0 | 0 |
| 0 | 0 | 0 | 0 | 0 | 0 | 0 | 0 | 0  | 0 | 0 |
| 0 | 0 | 0 | 0 | 1 | 0 | 0 | 0 | 4  | 0 | 0 |
| 0 | 0 | 0 | 0 | 0 | 0 | 0 | 0 | 0  | 0 | 0 |
| 0 | 0 | 0 | 0 | 0 | 0 | 0 | 0 | 0  | 0 | 0 |
| 0 | 0 | 0 | 0 | 0 | 0 | 0 | 0 | 0  | 0 | 0 |
| 0 | 0 | 0 | 0 | 0 | 1 | 0 | 1 | 0  | 0 | 0 |
| 0 | 1 | 0 | 0 | 0 | 0 | 0 | 0 | 1  | 0 | 0 |
| 0 | 0 | 0 | 0 | 0 | 0 | 0 | 0 | 1  | 0 | 0 |
| 0 | 2 | 2 | 0 | 0 | 0 | 0 | 0 | 0  | 0 | 0 |



|   |    |    |   |   |   |   |   |   |   |   |
|---|----|----|---|---|---|---|---|---|---|---|
| 0 | 2  | 0  | 0 | 0 | 0 | 0 | 0 | 0 | 0 | 0 |
| 0 | 3  | 0  | 1 | 0 | 0 | 0 | 0 | 0 | 0 | 0 |
| 0 | 1  | 62 | 2 | 0 | 0 | 0 | 0 | 1 | 0 | 0 |
| 0 | 0  | 12 | 0 | 0 | 0 | 0 | 0 | 1 | 0 | 0 |
| 0 | 0  | 0  | 0 | 0 | 0 | 0 | 0 | 0 | 0 | 0 |
| 0 | 0  | 0  | 0 | 1 | 0 | 0 | 0 | 0 | 0 | 0 |
| 0 | 0  | 0  | 1 | 0 | 0 | 0 | 0 | 0 | 0 | 0 |
| 0 | 0  | 0  | 1 | 0 | 0 | 0 | 0 | 0 | 0 | 0 |
| 0 | 0  | 0  | 0 | 0 | 0 | 0 | 0 | 2 | 0 | 0 |
| 0 | 0  | 0  | 0 | 0 | 0 | 0 | 0 | 2 | 0 | 0 |
| 0 | 1  | 0  | 1 | 0 | 0 | 0 | 0 | 2 | 0 | 0 |
| 0 | 0  | 0  | 0 | 0 | 0 | 0 | 0 | 2 | 0 | 1 |
| 0 | 0  | 0  | 0 | 0 | 0 | 0 | 0 | 0 | 0 | 0 |
| 0 | 0  | 0  | 0 | 1 | 0 | 1 | 0 | 1 | 0 | 0 |
| 0 | 0  | 0  | 0 | 0 | 0 | 0 | 0 | 0 | 0 | 0 |
| 0 | 0  | 0  | 0 | 4 | 0 | 1 | 0 | 0 | 0 | 0 |
| 0 | 0  | 0  | 0 | 0 | 0 | 0 | 0 | 0 | 0 | 0 |
| 0 | 3  | 0  | 0 | 1 | 0 | 0 | 0 | 0 | 0 | 0 |
| 0 | 1  | 0  | 0 | 1 | 0 | 0 | 0 | 0 | 0 | 0 |
| 0 | 1  | 0  | 0 | 0 | 0 | 0 | 0 | 0 | 0 | 0 |
| 0 | 0  | 0  | 0 | 0 | 0 | 0 | 0 | 0 | 0 | 0 |
| 0 | 0  | 0  | 0 | 0 | 0 | 0 | 0 | 0 | 0 | 0 |
| 0 | 0  | 1  | 0 | 0 | 0 | 0 | 0 | 0 | 0 | 0 |
| 0 | 0  | 0  | 0 | 0 | 0 | 0 | 0 | 0 | 0 | 0 |
| 0 | 4  | 0  | 0 | 0 | 0 | 0 | 0 | 0 | 0 | 0 |
| 0 | 0  | 0  | 0 | 1 | 0 | 0 | 0 | 0 | 0 | 0 |
| 0 | 0  | 0  | 0 | 0 | 0 | 0 | 0 | 2 | 0 | 0 |
| 0 | 0  | 1  | 0 | 0 | 0 | 0 | 0 | 3 | 0 | 0 |
| 0 | 10 | 1  | 0 | 0 | 0 | 0 | 0 | 2 | 0 | 0 |





|   |   |   |   |   |   |   |   |    |   |   |
|---|---|---|---|---|---|---|---|----|---|---|
| 0 | 1 | 0 | 0 | 0 | 0 | 0 | 0 | 0  | 0 | 0 |
| 0 | 0 | 0 | 0 | 0 | 0 | 0 | 0 | 0  | 0 | 0 |
| 0 | 0 | 0 | 0 | 1 | 0 | 0 | 0 | 0  | 0 | 0 |
| 0 | 4 | 0 | 0 | 0 | 0 | 0 | 0 | 0  | 0 | 0 |
| 0 | 0 | 0 | 0 | 0 | 0 | 0 | 0 | 2  | 0 | 0 |
| 0 | 0 | 0 | 0 | 0 | 0 | 0 | 0 | 4  | 0 | 0 |
| 0 | 0 | 0 | 0 | 2 | 0 | 0 | 0 | 1  | 0 | 0 |
| 0 | 0 | 0 | 0 | 0 | 0 | 0 | 0 | 2  | 0 | 0 |
| 0 | 1 | 0 | 0 | 0 | 0 | 0 | 0 | 1  | 0 | 0 |
| 0 | 0 | 0 | 0 | 0 | 0 | 0 | 0 | 7  | 0 | 0 |
| 0 | 0 | 0 | 0 | 0 | 0 | 0 | 0 | 2  | 0 | 0 |
| 0 | 1 | 0 | 0 | 1 | 0 | 0 | 0 | 5  | 0 | 0 |
| 0 | 0 | 0 | 0 | 1 | 0 | 0 | 0 | 3  | 0 | 0 |
| 0 | 0 | 0 | 0 | 0 | 0 | 0 | 0 | 2  | 0 | 0 |
| 0 | 0 | 0 | 0 | 0 | 0 | 0 | 0 | 0  | 0 | 0 |
| 0 | 0 | 0 | 1 | 0 | 0 | 0 | 0 | 0  | 0 | 0 |
| 0 | 0 | 0 | 0 | 0 | 0 | 0 | 0 | 0  | 0 | 0 |
| 0 | 1 | 0 | 0 | 0 | 0 | 0 | 0 | 2  | 0 | 0 |
| 0 | 0 | 0 | 1 | 1 | 0 | 0 | 0 | 0  | 0 | 0 |
| 0 | 0 | 0 | 0 | 0 | 0 | 0 | 0 | 0  | 0 | 0 |
| 0 | 0 | 0 | 0 | 0 | 0 | 0 | 0 | 0  | 0 | 0 |
| 0 | 1 | 0 | 0 | 0 | 0 | 0 | 0 | 0  | 0 | 0 |
| 0 | 0 | 0 | 0 | 0 | 0 | 0 | 0 | 0  | 0 | 0 |
| 0 | 0 | 0 | 0 | 0 | 0 | 0 | 0 | 0  | 0 | 0 |
| 0 | 0 | 0 | 0 | 0 | 0 | 0 | 0 | 0  | 0 | 0 |
| 0 | 0 | 0 | 0 | 0 | 0 | 0 | 0 | 3  | 1 | 0 |
| 0 | 0 | 0 | 0 | 0 | 0 | 0 | 0 | 2  | 0 | 0 |
| 0 | 0 | 0 | 0 | 0 | 0 | 0 | 0 | 9  | 0 | 0 |
| 0 | 0 | 0 | 0 | 1 | 0 | 0 | 0 | 16 | 0 | 0 |
| 0 | 0 | 0 | 0 | 0 | 0 | 0 | 0 | 8  | 0 | 0 |





|   |    |   |   |   |   |   |   |    |   |   |
|---|----|---|---|---|---|---|---|----|---|---|
| 0 | 0  | 0 | 0 | 0 | 0 | 0 | 0 | 1  | 0 | 0 |
| 0 | 0  | 0 | 0 | 0 | 0 | 0 | 0 | 0  | 0 | 0 |
| 0 | 0  | 0 | 0 | 0 | 0 | 0 | 0 | 1  | 0 | 0 |
| 0 | 0  | 0 | 0 | 0 | 0 | 0 | 0 | 13 | 0 | 0 |
| 0 | 0  | 0 | 0 | 0 | 0 | 0 | 0 | 2  | 0 | 0 |
| 0 | 0  | 0 | 0 | 0 | 0 | 0 | 0 | 1  | 0 | 0 |
| 0 | 0  | 0 | 0 | 0 | 0 | 0 | 0 | 1  | 0 | 0 |
| 0 | 0  | 0 | 0 | 0 | 0 | 0 | 0 | 0  | 0 | 0 |
| 0 | 0  | 0 | 0 | 1 | 0 | 0 | 0 | 2  | 0 | 0 |
| 0 | 0  | 0 | 0 | 0 | 0 | 0 | 0 | 2  | 0 | 0 |
| 0 | 0  | 1 | 0 | 0 | 0 | 1 | 0 | 0  | 0 | 0 |
| 0 | 0  | 0 | 0 | 0 | 0 | 0 | 0 | 1  | 0 | 0 |
| 0 | 0  | 0 | 0 | 1 | 0 | 0 | 0 | 1  | 0 | 0 |
| 0 | 0  | 0 | 0 | 0 | 0 | 0 | 0 | 1  | 0 | 0 |
| 0 | 0  | 0 | 0 | 1 | 0 | 0 | 0 | 0  | 0 | 0 |
| 0 | 1  | 0 | 0 | 1 | 0 | 0 | 0 | 1  | 1 | 0 |
| 0 | 0  | 0 | 0 | 0 | 0 | 0 | 0 | 1  | 0 | 0 |
| 0 | 6  | 1 | 0 | 0 | 0 | 0 | 0 | 1  | 0 | 0 |
| 0 | 7  | 0 | 0 | 0 | 0 | 0 | 0 | 1  | 0 | 0 |
| 0 | 0  | 0 | 0 | 1 | 0 | 0 | 0 | 1  | 0 | 0 |
| 0 | 2  | 0 | 0 | 0 | 0 | 0 | 0 | 0  | 0 | 0 |
| 0 | 1  | 0 | 0 | 0 | 0 | 0 | 0 | 0  | 0 | 0 |
| 0 | 9  | 0 | 0 | 0 | 0 | 0 | 0 | 5  | 0 | 0 |
| 0 | 1  | 0 | 0 | 0 | 0 | 0 | 0 | 1  | 0 | 0 |
| 0 | 0  | 1 | 0 | 1 | 0 | 0 | 0 | 0  | 0 | 0 |
| 0 | 2  | 0 | 0 | 0 | 0 | 0 | 0 | 1  | 0 | 0 |
| 0 | 2  | 0 | 0 | 0 | 0 | 0 | 0 | 1  | 0 | 0 |
| 0 | 1  | 0 | 0 | 0 | 0 | 0 | 0 | 1  | 0 | 0 |
| 0 | 15 | 5 | 0 | 0 | 0 | 0 | 0 | 1  | 0 | 0 |









|   |   |   |   |   |   |   |   |    |   |   |
|---|---|---|---|---|---|---|---|----|---|---|
| 0 | 0 | 0 | 0 | 0 | 0 | 0 | 0 | 3  | 0 | 0 |
| 0 | 1 | 0 | 0 | 0 | 0 | 0 | 0 | 1  | 0 | 0 |
| 0 | 1 | 0 | 0 | 0 | 0 | 0 | 0 | 6  | 0 | 0 |
| 0 | 0 | 0 | 0 | 1 | 0 | 0 | 0 | 4  | 0 | 0 |
| 0 | 0 | 0 | 0 | 0 | 0 | 0 | 0 | 0  | 0 | 0 |
| 0 | 1 | 0 | 0 | 0 | 0 | 0 | 0 | 2  | 0 | 0 |
| 0 | 1 | 0 | 0 | 0 | 0 | 0 | 0 | 4  | 0 | 0 |
| 0 | 0 | 0 | 0 | 0 | 0 | 0 | 0 | 0  | 0 | 0 |
| 0 | 2 | 0 | 0 | 0 | 0 | 0 | 0 | 2  | 0 | 0 |
| 0 | 1 | 0 | 0 | 0 | 0 | 0 | 0 | 2  | 0 | 0 |
| 0 | 1 | 0 | 0 | 0 | 0 | 0 | 0 | 9  | 0 | 0 |
| 0 | 1 | 0 | 0 | 0 | 0 | 0 | 0 | 0  | 0 | 0 |
| 0 | 0 | 0 | 0 | 0 | 0 | 0 | 0 | 12 | 0 | 0 |
| 0 | 0 | 0 | 0 | 0 | 0 | 0 | 0 | 14 | 0 | 0 |
| 0 | 1 | 0 | 0 | 0 | 0 | 0 | 0 | 8  | 0 | 0 |
| 0 | 1 | 0 | 0 | 0 | 0 | 0 | 0 | 6  | 0 | 0 |
| 0 | 0 | 0 | 0 | 1 | 0 | 0 | 0 | 7  | 0 | 0 |
| 0 | 0 | 0 | 0 | 0 | 0 | 0 | 0 | 2  | 0 | 0 |
| 0 | 0 | 0 | 0 | 0 | 0 | 0 | 0 | 5  | 0 | 0 |
| 0 | 0 | 0 | 0 | 1 | 0 | 0 | 0 | 23 | 0 | 0 |
| 0 | 0 | 0 | 0 | 1 | 0 | 0 | 0 | 30 | 0 | 0 |
| 0 | 0 | 0 | 0 | 1 | 0 | 0 | 0 | 25 | 0 | 0 |
| 0 | 0 | 0 | 0 | 1 | 0 | 0 | 0 | 15 | 0 | 0 |
| 0 | 0 | 0 | 0 | 0 | 0 | 0 | 0 | 10 | 0 | 0 |
| 0 | 0 | 0 | 0 | 0 | 0 | 0 | 0 | 19 | 0 | 0 |
| 0 | 0 | 0 | 0 | 0 | 0 | 0 | 0 | 19 | 0 | 0 |
| 0 | 0 | 0 | 0 | 2 | 0 | 0 | 0 | 8  | 0 | 0 |
| 0 | 0 | 0 | 0 | 1 | 0 | 0 | 0 | 5  | 0 | 0 |
| 0 | 0 | 0 | 0 | 0 | 0 | 0 | 0 | 30 | 0 | 0 |





|   |   |   |   |   |   |   |   |   |   |   |   |
|---|---|---|---|---|---|---|---|---|---|---|---|
| 2 | 0 | 0 | 0 | 0 | 0 | 0 | 0 | 0 | 0 | 0 | 0 |
| 0 | 0 | 0 | 0 | 0 | 0 | 0 | 1 | 0 | 0 | 0 | 0 |
| 0 | 0 | 0 | 0 | 0 | 0 | 0 | 0 | 1 | 0 | 0 | 0 |
| 0 | 0 | 0 | 1 | 0 | 0 | 0 | 0 | 1 | 0 | 0 | 0 |
| 0 | 0 | 0 | 0 | 0 | 0 | 0 | 0 | 0 | 0 | 0 | 0 |
| 0 | 0 | 0 | 0 | 0 | 0 | 0 | 0 | 3 | 0 | 0 | 0 |
| 0 | 0 | 0 | 0 | 0 | 0 | 0 | 0 | 0 | 0 | 0 | 0 |
| 0 | 1 | 0 | 0 | 0 | 0 | 0 | 0 | 1 | 0 | 0 | 0 |
| 0 | 1 | 0 | 0 | 0 | 0 | 0 | 0 | 0 | 0 | 0 | 0 |
| 0 | 0 | 0 | 0 | 0 | 0 | 0 | 0 | 1 | 0 | 0 | 0 |
| 0 | 0 | 0 | 0 | 0 | 0 | 1 | 0 | 0 | 0 | 0 | 0 |
| 0 | 0 | 0 | 0 | 0 | 0 | 0 | 0 | 0 | 0 | 0 | 0 |
| 0 | 0 | 0 | 0 | 0 | 0 | 0 | 0 | 0 | 0 | 0 | 0 |
| 0 | 1 | 0 | 0 | 0 | 0 | 0 | 0 | 0 | 0 | 0 | 0 |
| 0 | 0 | 0 | 0 | 0 | 0 | 0 | 0 | 0 | 0 | 0 | 0 |
| 0 | 0 | 0 | 0 | 0 | 0 | 0 | 0 | 0 | 0 | 0 | 0 |
| 0 | 0 | 0 | 0 | 0 | 0 | 0 | 0 | 0 | 0 | 0 | 0 |
| 0 | 0 | 0 | 0 | 0 | 0 | 0 | 0 | 0 | 0 | 0 | 0 |
| 0 | 0 | 0 | 0 | 0 | 0 | 0 | 0 | 0 | 0 | 0 | 0 |
| 0 | 0 | 0 | 0 | 0 | 0 | 0 | 1 | 0 | 2 | 0 | 0 |
| 0 | 0 | 0 | 0 | 0 | 0 | 1 | 0 | 0 | 0 | 0 | 0 |
| 0 | 0 | 0 | 0 | 0 | 0 | 1 | 0 | 0 | 0 | 0 | 0 |
| 0 | 0 | 0 | 0 | 0 | 0 | 0 | 0 | 0 | 0 | 0 | 0 |
| 0 | 0 | 0 | 0 | 0 | 0 | 0 | 0 | 0 | 0 | 0 | 0 |
| 0 | 0 | 0 | 0 | 0 | 0 | 0 | 0 | 0 | 0 | 0 | 0 |
| 0 | 0 | 0 | 0 | 0 | 0 | 1 | 0 | 0 | 0 | 0 | 0 |
| 0 | 0 | 0 | 0 | 0 | 0 | 1 | 0 | 0 | 0 | 0 | 0 |
| 0 | 0 | 0 | 0 | 0 | 0 | 0 | 0 | 0 | 0 | 0 | 0 |
| 0 | 0 | 0 | 0 | 0 | 0 | 0 | 0 | 0 | 0 | 0 | 0 |
| 0 | 0 | 0 | 0 | 0 | 0 | 0 | 0 | 0 | 0 | 0 | 0 |
| 0 | 0 | 0 | 0 | 0 | 0 | 2 | 0 | 0 | 0 | 0 | 0 |



|   |   |   |   |   |   |   |   |   |   |   |
|---|---|---|---|---|---|---|---|---|---|---|
| 0 | 0 | 0 | 0 | 0 | 0 | 1 | 0 | 0 | 0 | 0 |
| 0 | 0 | 0 | 0 | 0 | 0 | 2 | 0 | 0 | 0 | 0 |
| 0 | 0 | 0 | 0 | 0 | 0 | 4 | 0 | 0 | 0 | 0 |
| 0 | 0 | 0 | 0 | 0 | 0 | 1 | 0 | 0 | 0 | 0 |
| 0 | 0 | 0 | 0 | 0 | 0 | 3 | 0 | 0 | 0 | 0 |
| 0 | 0 | 0 | 0 | 0 | 0 | 2 | 0 | 0 | 0 | 0 |
| 0 | 0 | 0 | 0 | 0 | 1 | 3 | 0 | 0 | 0 | 0 |
| 0 | 0 | 0 | 0 | 0 | 0 | 0 | 0 | 0 | 0 | 0 |
| 0 | 0 | 0 | 0 | 1 | 0 | 3 | 0 | 0 | 0 | 0 |
| 0 | 0 | 0 | 0 | 0 | 0 | 6 | 0 | 0 | 0 | 0 |
| 0 | 0 | 0 | 0 | 0 | 0 | 3 | 0 | 0 | 0 | 0 |
| 0 | 1 | 0 | 0 | 0 | 0 | 2 | 0 | 0 | 0 | 0 |
| 0 | 0 | 0 | 0 | 0 | 0 | 2 | 0 | 0 | 0 | 0 |
| 0 | 0 | 0 | 0 | 0 | 0 | 2 | 0 | 0 | 0 | 0 |
| 0 | 0 | 0 | 0 | 0 | 0 | 0 | 0 | 0 | 0 | 0 |
| 0 | 0 | 0 | 0 | 0 | 0 | 5 | 0 | 0 | 0 | 0 |
| 0 | 0 | 0 | 0 | 0 | 0 | 0 | 0 | 0 | 0 | 0 |
| 0 | 0 | 0 | 0 | 0 | 0 | 1 | 0 | 0 | 0 | 0 |
| 0 | 0 | 0 | 0 | 0 | 0 | 2 | 0 | 0 | 0 | 0 |
| 0 | 3 | 0 | 0 | 0 | 0 | 2 | 0 | 0 | 0 | 0 |
| 0 | 0 | 0 | 0 | 0 | 0 | 1 | 0 | 1 | 0 | 0 |
| 0 | 0 | 0 | 0 | 0 | 0 | 1 | 0 | 0 | 0 | 0 |
| 0 | 0 | 0 | 0 | 0 | 0 | 3 | 0 | 0 | 0 | 0 |
| 0 | 0 | 0 | 0 | 0 | 0 | 2 | 0 | 1 | 0 | 0 |
| 0 | 0 | 0 | 0 | 0 | 0 | 0 | 0 | 0 | 0 | 0 |
| 0 | 0 | 0 | 0 | 0 | 0 | 2 | 0 | 0 | 0 | 0 |
| 0 | 0 | 0 | 0 | 0 | 0 | 1 | 0 | 0 | 0 | 0 |
| 0 | 0 | 0 | 0 | 0 | 0 | 0 | 0 | 0 | 0 | 0 |
| 0 | 0 | 0 | 0 | 0 | 0 | 2 | 0 | 0 | 0 | 0 |











|   |   |   |   |   |   |   |   |   |   |   |
|---|---|---|---|---|---|---|---|---|---|---|
| 0 | 0 | 0 | 0 | 0 | 0 | 0 | 0 | 1 | 0 | 0 |
| 0 | 0 | 0 | 0 | 0 | 0 | 0 | 0 | 0 | 0 | 0 |
| 0 | 0 | 0 | 0 | 0 | 0 | 0 | 0 | 1 | 0 | 0 |
| 0 | 0 | 0 | 0 | 0 | 0 | 0 | 0 | 0 | 0 | 1 |
| 0 | 0 | 0 | 0 | 0 | 0 | 0 | 0 | 0 | 0 | 0 |
| 0 | 0 | 0 | 0 | 0 | 0 | 0 | 0 | 1 | 0 | 0 |
| 0 | 0 | 0 | 0 | 0 | 0 | 0 | 0 | 1 | 0 | 0 |
| 0 | 0 | 0 | 0 | 0 | 0 | 0 | 0 | 2 | 0 | 0 |
| 0 | 0 | 0 | 0 | 0 | 0 | 0 | 0 | 0 | 0 | 0 |
| 0 | 0 | 0 | 0 | 0 | 0 | 0 | 0 | 0 | 0 | 0 |
| 0 | 0 | 0 | 0 | 0 | 0 | 0 | 0 | 0 | 0 | 0 |
| 0 | 0 | 0 | 0 | 0 | 0 | 0 | 0 | 1 | 0 | 0 |
| 0 | 0 | 0 | 0 | 0 | 0 | 0 | 0 | 0 | 0 | 0 |
| 0 | 0 | 0 | 0 | 0 | 0 | 0 | 0 | 1 | 0 | 0 |
| 0 | 0 | 0 | 0 | 0 | 0 | 0 | 0 | 0 | 0 | 0 |
| 0 | 0 | 0 | 0 | 0 | 0 | 0 | 0 | 0 | 0 | 0 |
| 0 | 0 | 0 | 0 | 0 | 0 | 0 | 0 | 1 | 0 | 0 |
| 0 | 0 | 0 | 0 | 0 | 0 | 0 | 0 | 3 | 0 | 0 |
| 0 | 0 | 0 | 0 | 0 | 0 | 0 | 0 | 0 | 0 | 0 |
| 0 | 0 | 0 | 0 | 0 | 0 | 0 | 0 | 2 | 0 | 0 |
| 0 | 0 | 0 | 0 | 0 | 0 | 0 | 0 | 0 | 0 | 0 |
| 0 | 0 | 0 | 0 | 0 | 0 | 0 | 0 | 0 | 0 | 0 |
| 0 | 0 | 0 | 0 | 0 | 0 | 1 | 0 | 0 | 0 | 0 |
| 0 | 0 | 0 | 0 | 0 | 0 | 2 | 0 | 0 | 0 | 0 |
| 0 | 0 | 0 | 0 | 0 | 0 | 0 | 0 | 0 | 0 | 0 |
| 0 | 0 | 1 | 0 | 0 | 0 | 0 | 0 | 0 | 0 | 0 |
| 0 | 0 | 0 | 0 | 1 | 0 | 0 | 0 | 0 | 0 | 0 |
| 0 | 0 | 0 | 0 | 0 | 0 | 1 | 0 | 0 | 0 | 0 |

|   |   |   |   |   |   |   |   |   |   |   |
|---|---|---|---|---|---|---|---|---|---|---|
| 0 | 0 | 0 | 0 | 0 | 0 | 0 | 0 | 0 | 0 | 0 |
| 0 | 0 | 0 | 0 | 0 | 0 | 1 | 0 | 0 | 0 | 0 |
| 0 | 0 | 0 | 0 | 0 | 0 | 1 | 0 | 0 | 0 | 0 |
| 0 | 0 | 0 | 0 | 0 | 0 | 4 | 0 | 0 | 0 | 0 |
| 0 | 0 | 0 | 0 | 0 | 0 | 0 | 0 | 0 | 0 | 0 |
| 0 | 0 | 0 | 0 | 0 | 0 | 0 | 0 | 0 | 0 | 0 |
| 0 | 0 | 0 | 0 | 0 | 0 | 0 | 0 | 0 | 0 | 0 |
| 0 | 0 | 0 | 0 | 0 | 0 | 0 | 0 | 0 | 0 | 0 |
| 0 | 0 | 0 | 0 | 0 | 0 | 0 | 0 | 0 | 0 | 0 |
| 0 | 0 | 0 | 0 | 0 | 0 | 0 | 0 | 0 | 1 | 0 |
| 0 | 0 | 0 | 0 | 1 | 0 | 0 | 0 | 0 | 0 | 0 |
| 0 | 0 | 0 | 0 | 0 | 0 | 0 | 0 | 0 | 0 | 0 |
| 0 | 0 | 0 | 0 | 0 | 0 | 0 | 0 | 0 | 0 | 0 |
| 0 | 0 | 0 | 0 | 0 | 0 | 1 | 0 | 0 | 0 | 0 |
| 0 | 1 | 0 | 0 | 0 | 0 | 1 | 0 | 0 | 0 | 0 |
| 0 | 0 | 0 | 0 | 0 | 0 | 1 | 0 | 0 | 0 | 0 |
| 0 | 0 | 0 | 0 | 0 | 0 | 1 | 0 | 0 | 0 | 0 |
| 0 | 0 | 0 | 0 | 0 | 0 | 1 | 0 | 0 | 0 | 0 |
| 0 | 0 | 0 | 0 | 0 | 0 | 8 | 0 | 1 | 0 | 0 |
| 0 | 0 | 0 | 0 | 0 | 0 | 1 | 0 | 0 | 0 | 0 |
| 0 | 0 | 0 | 0 | 0 | 0 | 0 | 0 | 0 | 0 | 0 |
| 0 | 0 | 0 | 0 | 0 | 0 | 1 | 0 | 0 | 0 | 0 |
| 0 | 0 | 0 | 0 | 0 | 0 | 0 | 0 | 0 | 0 | 0 |
| 0 | 0 | 0 | 0 | 0 | 0 | 0 | 0 | 0 | 0 | 0 |
| 0 | 0 | 0 | 0 | 0 | 0 | 1 | 0 | 0 | 0 | 0 |
| 0 | 0 | 0 | 0 | 0 | 0 | 0 | 0 | 0 | 0 | 0 |
| 0 | 0 | 0 | 0 | 0 | 0 | 0 | 0 | 0 | 0 | 0 |
| 0 | 0 | 0 | 0 | 0 | 0 | 0 | 0 | 0 | 0 | 0 |
| 0 | 0 | 0 | 0 | 0 | 0 | 0 | 0 | 0 | 0 | 0 |
| 0 | 0 | 0 | 0 | 0 | 0 | 1 | 0 | 0 | 0 | 0 |
| 0 | 0 | 0 | 0 | 0 | 0 | 1 | 0 | 0 | 0 | 0 |

|   |   |   |   |   |   |   |   |   |   |   |
|---|---|---|---|---|---|---|---|---|---|---|
| 0 | 0 | 0 | 0 | 0 | 0 | 0 | 0 | 0 | 0 | 0 |
| 0 | 0 | 0 | 0 | 0 | 0 | 2 | 0 | 0 | 0 | 0 |
| 0 | 0 | 0 | 0 | 0 | 0 | 1 | 0 | 1 | 0 | 0 |
| 0 | 0 | 0 | 0 | 0 | 0 | 2 | 0 | 0 | 0 | 0 |
| 0 | 0 | 0 | 0 | 0 | 0 | 0 | 0 | 0 | 0 | 0 |
| 0 | 0 | 0 | 0 | 0 | 0 | 0 | 0 | 0 | 0 | 0 |
| 0 | 0 | 0 | 0 | 0 | 0 | 0 | 0 | 0 | 0 | 0 |
| 0 | 0 | 0 | 0 | 0 | 0 | 0 | 0 | 0 | 0 | 0 |
| 0 | 0 | 0 | 0 | 0 | 0 | 0 | 0 | 0 | 0 | 0 |
| 0 | 0 | 0 | 0 | 0 | 0 | 0 | 0 | 0 | 0 | 0 |
| 0 | 0 | 0 | 0 | 0 | 0 | 0 | 0 | 0 | 0 | 0 |
| 0 | 0 | 0 | 0 | 0 | 0 | 2 | 0 | 0 | 0 | 0 |
| 0 | 0 | 0 | 0 | 0 | 0 | 2 | 0 | 0 | 0 | 0 |
| 0 | 0 | 0 | 0 | 0 | 0 | 3 | 0 | 0 | 0 | 0 |
| 0 | 0 | 0 | 0 | 0 | 0 | 0 | 0 | 0 | 0 | 0 |
| 0 | 0 | 0 | 0 | 0 | 0 | 0 | 0 | 0 | 0 | 0 |
| 0 | 0 | 0 | 0 | 0 | 0 | 2 | 0 | 0 | 0 | 0 |
| 0 | 0 | 0 | 0 | 0 | 0 | 1 | 0 | 0 | 0 | 0 |
| 0 | 0 | 0 | 0 | 0 | 0 | 0 | 0 | 0 | 0 | 0 |
| 0 | 0 | 0 | 0 | 0 | 0 | 2 | 0 | 0 | 0 | 0 |
| 0 | 1 | 0 | 0 | 0 | 0 | 0 | 0 | 0 | 0 | 0 |
| 0 | 0 | 0 | 0 | 0 | 0 | 0 | 0 | 1 | 0 | 0 |
| 0 | 0 | 0 | 0 | 0 | 0 | 0 | 0 | 0 | 0 | 0 |
| 0 | 0 | 0 | 0 | 0 | 0 | 1 | 0 | 0 | 0 | 0 |
| 0 | 0 | 0 | 0 | 0 | 0 | 1 | 0 | 0 | 0 | 0 |
| 0 | 0 | 0 | 0 | 0 | 0 | 0 | 0 | 0 | 0 | 0 |
| 0 | 1 | 0 | 0 | 0 | 0 | 0 | 0 | 0 | 0 | 0 |
| 0 | 0 | 0 | 0 | 0 | 0 | 0 | 0 | 1 | 0 | 0 |
| 0 | 1 | 0 | 0 | 0 | 0 | 1 | 0 | 0 | 0 | 0 |







































| torhur | traole | troden | turaot | waibre | xymple | zealut | zoeasp |   |
|--------|--------|--------|--------|--------|--------|--------|--------|---|
| 0      | 1      | 0      | 0      | 0      | 1      | 0      | 0      | 0 |
| 0      | 0      | 2      | 0      | 0      | 0      | 0      | 0      | 0 |
| 0      | 1      | 2      | 0      | 0      | 0      | 0      | 3      | 0 |
| 1      | 0      | 1      | 0      | 0      | 0      | 0      | 0      | 0 |
| 0      | 0      | 3      | 0      | 0      | 1      | 0      | 1      | 0 |
| 0      | 0      | 1      | 0      | 0      | 0      | 0      | 0      | 0 |
| 0      | 0      | 0      | 0      | 0      | 0      | 0      | 0      | 0 |
| 0      | 0      | 5      | 0      | 0      | 0      | 0      | 0      | 0 |
| 0      | 0      | 1      | 0      | 0      | 0      | 0      | 0      | 0 |
| 0      | 0      | 1      | 0      | 0      | 0      | 0      | 1      | 0 |
| 0      | 0      | 2      | 0      | 0      | 0      | 0      | 0      | 0 |
| 0      | 0      | 0      | 0      | 0      | 1      | 0      | 0      | 0 |
| 0      | 1      | 0      | 0      | 0      | 1      | 0      | 1      | 0 |
| 0      | 0      | 0      | 0      | 0      | 1      | 0      | 0      | 0 |
| 0      | 0      | 1      | 0      | 0      | 0      | 0      | 0      | 1 |
| 0      | 0      | 0      | 0      | 0      | 0      | 0      | 0      | 0 |
| 0      | 0      | 0      | 0      | 0      | 0      | 0      | 0      | 0 |
| 0      | 0      | 0      | 0      | 0      | 0      | 0      | 0      | 0 |
| 0      | 0      | 0      | 0      | 0      | 0      | 0      | 0      | 0 |
| 0      | 0      | 1      | 0      | 0      | 0      | 0      | 0      | 0 |
| 0      | 0      | 2      | 0      | 0      | 0      | 0      | 1      | 0 |
| 0      | 0      | 0      | 0      | 0      | 2      | 0      | 0      | 0 |
| 0      | 0      | 1      | 0      | 0      | 0      | 0      | 0      | 1 |
| 1      | 1      | 2      | 0      | 0      | 0      | 0      | 3      | 0 |
| 1      | 0      | 1      | 0      | 0      | 0      | 0      | 1      | 0 |
| 0      | 0      | 0      | 0      | 0      | 0      | 0      | 0      | 0 |
| 0      | 0      | 0      | 0      | 0      | 0      | 0      | 0      | 0 |
| 0      | 0      | 0      | 0      | 0      | 0      | 0      | 0      | 0 |
| 0      | 0      | 0      | 0      | 0      | 0      | 0      | 0      | 0 |
| 0      | 0      | 1      | 0      | 0      | 0      | 0      | 1      | 0 |

|   |   |   |   |   |   |   |   |
|---|---|---|---|---|---|---|---|
| 0 | 1 | 0 | 0 | 0 | 0 | 1 | 0 |
| 0 | 0 | 0 | 0 | 0 | 0 | 0 | 0 |
| 0 | 0 | 0 | 0 | 0 | 0 | 0 | 0 |
| 0 | 0 | 1 | 0 | 0 | 0 | 0 | 0 |
| 0 | 0 | 0 | 0 | 0 | 0 | 0 | 0 |
| 0 | 0 | 1 | 0 | 0 | 0 | 0 | 0 |
| 0 | 0 | 0 | 0 | 0 | 0 | 0 | 0 |
| 0 | 0 | 2 | 0 | 0 | 0 | 0 | 0 |
| 0 | 0 | 0 | 0 | 0 | 0 | 0 | 0 |
| 0 | 0 | 0 | 0 | 0 | 0 | 0 | 0 |
| 0 | 0 | 0 | 0 | 0 | 0 | 0 | 0 |
| 0 | 0 | 2 | 0 | 0 | 0 | 0 | 0 |
| 0 | 0 | 0 | 0 | 0 | 0 | 0 | 0 |
| 0 | 0 | 1 | 0 | 0 | 0 | 0 | 0 |
| 2 | 1 | 0 | 0 | 0 | 0 | 2 | 0 |
| 0 | 1 | 0 | 0 | 0 | 0 | 0 | 0 |
| 0 | 0 | 4 | 0 | 0 | 0 | 0 | 0 |
| 0 | 0 | 4 | 0 | 0 | 0 | 1 | 0 |
| 0 | 1 | 1 | 0 | 0 | 0 | 0 | 0 |
| 0 | 0 | 0 | 0 | 0 | 0 | 1 | 1 |
| 0 | 0 | 1 | 0 | 0 | 0 | 1 | 1 |
| 0 | 0 | 0 | 0 | 0 | 0 | 0 | 0 |
| 0 | 0 | 2 | 0 | 0 | 0 | 0 | 0 |
| 0 | 0 | 0 | 0 | 0 | 0 | 0 | 0 |
| 0 | 0 | 0 | 0 | 0 | 0 | 0 | 0 |
| 0 | 0 | 0 | 0 | 0 | 0 | 0 | 0 |
| 0 | 0 | 0 | 0 | 0 | 0 | 0 | 0 |
| 0 | 0 | 0 | 0 | 0 | 0 | 0 | 0 |
| 0 | 0 | 0 | 0 | 0 | 0 | 0 | 0 |
| 0 | 0 | 0 | 0 | 0 | 0 | 0 | 0 |
| 0 | 0 | 1 | 0 | 0 | 0 | 0 | 0 |



|   |   |   |   |   |   |   |   |
|---|---|---|---|---|---|---|---|
| 0 | 0 | 0 | 0 | 0 | 0 | 0 | 0 |
| 0 | 0 | 0 | 0 | 0 | 0 | 0 | 0 |
| 0 | 0 | 1 | 0 | 0 | 0 | 0 | 0 |
| 0 | 0 | 0 | 0 | 0 | 0 | 0 | 0 |
| 0 | 1 | 0 | 0 | 1 | 0 | 0 | 0 |
| 0 | 0 | 0 | 1 | 0 | 0 | 0 | 0 |
| 0 | 0 | 0 | 0 | 0 | 0 | 0 | 0 |
| 0 | 1 | 0 | 0 | 0 | 0 | 0 | 0 |
| 0 | 0 | 0 | 0 | 1 | 0 | 0 | 0 |
| 0 | 0 | 0 | 0 | 0 | 0 | 0 | 0 |
| 0 | 0 | 0 | 0 | 0 | 0 | 0 | 0 |
| 0 | 0 | 0 | 0 | 1 | 0 | 0 | 0 |
| 0 | 0 | 0 | 0 | 0 | 0 | 0 | 0 |
| 0 | 0 | 0 | 0 | 1 | 0 | 0 | 0 |
| 0 | 0 | 0 | 0 | 0 | 0 | 0 | 0 |
| 0 | 0 | 0 | 0 | 0 | 0 | 0 | 0 |
| 0 | 0 | 1 | 0 | 1 | 0 | 0 | 0 |
| 0 | 0 | 0 | 0 | 1 | 0 | 0 | 0 |
| 0 | 0 | 0 | 0 | 1 | 0 | 0 | 0 |
| 0 | 0 | 3 | 0 | 0 | 0 | 0 | 0 |
| 0 | 0 | 0 | 0 | 4 | 0 | 0 | 0 |
| 5 | 0 | 0 | 0 | 0 | 0 | 0 | 0 |
| 0 | 0 | 0 | 0 | 0 | 0 | 0 | 0 |
| 1 | 0 | 0 | 0 | 0 | 0 | 0 | 0 |
| 0 | 0 | 0 | 0 | 0 | 0 | 0 | 0 |
| 0 | 0 | 0 | 0 | 1 | 0 | 0 | 0 |
| 0 | 0 | 0 | 0 | 0 | 0 | 0 | 0 |
| 0 | 0 | 0 | 0 | 1 | 0 | 0 | 0 |
| 0 | 0 | 0 | 0 | 0 | 0 | 0 | 0 |
| 0 | 0 | 2 | 0 | 0 | 0 | 0 | 0 |

|   |   |   |   |   |   |   |   |
|---|---|---|---|---|---|---|---|
| 0 | 0 | 0 | 0 | 0 | 0 | 0 | 0 |
| 0 | 0 | 0 | 0 | 0 | 0 | 0 | 0 |
| 0 | 0 | 0 | 0 | 0 | 0 | 0 | 0 |
| 0 | 0 | 0 | 0 | 0 | 1 | 1 | 0 |
| 0 | 0 | 0 | 0 | 0 | 0 | 0 | 0 |
| 0 | 0 | 0 | 0 | 0 | 0 | 0 | 0 |
| 0 | 0 | 0 | 0 | 0 | 0 | 0 | 0 |
| 0 | 0 | 0 | 0 | 0 | 0 | 0 | 0 |
| 0 | 0 | 0 | 0 | 1 | 0 | 0 | 0 |
| 0 | 1 | 1 | 0 | 0 | 0 | 0 | 0 |
| 0 | 0 | 0 | 0 | 1 | 0 | 0 | 0 |
| 0 | 0 | 0 | 0 | 1 | 0 | 0 | 0 |
| 0 | 0 | 0 | 0 | 0 | 0 | 8 | 0 |
| 0 | 1 | 0 | 0 | 0 | 0 | 1 | 0 |
| 1 | 0 | 0 | 0 | 0 | 0 | 2 | 0 |
| 0 | 0 | 0 | 0 | 0 | 0 | 0 | 0 |
| 0 | 1 | 0 | 0 | 0 | 0 | 0 | 0 |
| 0 | 0 | 0 | 0 | 0 | 0 | 1 | 0 |
| 0 | 0 | 1 | 0 | 0 | 0 | 0 | 0 |
| 0 | 0 | 0 | 0 | 0 | 0 | 2 | 0 |
| 0 | 0 | 1 | 0 | 0 | 0 | 0 | 0 |
| 0 | 0 | 0 | 0 | 0 | 0 | 0 | 0 |
| 0 | 0 | 1 | 0 | 0 | 0 | 0 | 0 |
| 1 | 0 | 0 | 0 | 0 | 0 | 0 | 0 |
| 0 | 0 | 0 | 0 | 1 | 0 | 0 | 0 |
| 0 | 0 | 0 | 0 | 1 | 0 | 0 | 0 |
| 0 | 0 | 0 | 0 | 1 | 0 | 0 | 0 |
| 0 | 0 | 0 | 0 | 0 | 0 | 0 | 0 |

|   |   |   |   |   |   |   |   |
|---|---|---|---|---|---|---|---|
| 0 | 0 | 1 | 0 | 0 | 0 | 0 | 1 |
| 0 | 0 | 0 | 0 | 0 | 0 | 1 | 0 |
| 1 | 2 | 1 | 0 | 0 | 0 | 1 | 0 |
| 0 | 0 | 0 | 0 | 0 | 0 | 0 | 0 |
| 0 | 1 | 0 | 0 | 0 | 0 | 0 | 0 |
| 0 | 0 | 0 | 0 | 0 | 0 | 1 | 0 |
| 1 | 0 | 2 | 0 | 0 | 0 | 0 | 0 |
| 0 | 1 | 0 | 0 | 0 | 0 | 0 | 0 |
| 1 | 1 | 3 | 0 | 0 | 0 | 0 | 0 |
| 0 | 0 | 0 | 0 | 0 | 0 | 1 | 0 |
| 0 | 3 | 0 | 0 | 0 | 0 | 0 | 0 |
| 0 | 0 | 0 | 0 | 0 | 1 | 0 | 0 |
| 0 | 0 | 2 | 0 | 0 | 0 | 0 | 0 |
| 0 | 0 | 1 | 0 | 0 | 0 | 0 | 0 |
| 0 | 0 | 0 | 0 | 0 | 0 | 0 | 0 |
| 0 | 0 | 1 | 0 | 0 | 0 | 2 | 0 |
| 0 | 0 | 1 | 0 | 0 | 0 | 1 | 1 |
| 0 | 0 | 1 | 0 | 0 | 0 | 0 | 0 |
| 0 | 0 | 1 | 1 | 0 | 0 | 0 | 0 |
| 0 | 0 | 0 | 0 | 0 | 0 | 2 | 0 |
| 0 | 0 | 3 | 0 | 0 | 0 | 2 | 0 |
| 0 | 0 | 0 | 0 | 0 | 0 | 0 | 0 |
| 0 | 0 | 1 | 0 | 0 | 0 | 0 | 0 |
| 0 | 0 | 1 | 0 | 0 | 0 | 0 | 0 |
| 0 | 1 | 1 | 0 | 0 | 0 | 0 | 0 |
| 0 | 0 | 0 | 0 | 0 | 0 | 0 | 1 |
| 0 | 0 | 0 | 0 | 0 | 0 | 0 | 0 |
| 0 | 0 | 0 | 0 | 0 | 0 | 1 | 0 |
| 0 | 0 | 0 | 0 | 0 | 0 | 0 | 0 |

|   |   |   |   |   |   |   |   |
|---|---|---|---|---|---|---|---|
| 0 | 0 | 0 | 0 | 0 | 0 | 0 | 0 |
| 0 | 0 | 4 | 0 | 0 | 0 | 1 | 0 |
| 0 | 0 | 1 | 0 | 0 | 0 | 1 | 1 |
| 1 | 1 | 1 | 0 | 0 | 0 | 0 | 0 |
| 0 | 1 | 0 | 0 | 0 | 0 | 4 | 0 |
| 0 | 0 | 1 | 0 | 0 | 0 | 1 | 0 |
| 0 | 1 | 1 | 0 | 0 | 0 | 2 | 0 |
| 0 | 2 | 4 | 0 | 0 | 0 | 5 | 1 |
| 0 | 0 | 5 | 0 | 0 | 0 | 2 | 0 |
| 0 | 2 | 2 | 0 | 0 | 0 | 1 | 0 |
| 0 | 0 | 0 | 0 | 0 | 0 | 3 | 0 |
| 0 | 0 | 1 | 0 | 0 | 0 | 0 | 0 |
| 1 | 0 | 2 | 0 | 0 | 0 | 0 | 0 |
| 0 | 0 | 4 | 0 | 0 | 0 | 0 | 0 |
| 0 | 0 | 0 | 0 | 0 | 0 | 2 | 0 |
| 1 | 0 | 0 | 0 | 0 | 0 | 3 | 0 |
| 0 | 0 | 0 | 0 | 0 | 0 | 5 | 0 |
| 0 | 0 | 1 | 0 | 0 | 0 | 0 | 0 |
| 0 | 0 | 0 | 0 | 0 | 0 | 0 | 0 |
| 1 | 0 | 0 | 0 | 0 | 0 | 0 | 0 |
| 0 | 0 | 0 | 0 | 0 | 0 | 0 | 0 |
| 0 | 0 | 0 | 0 | 0 | 0 | 0 | 0 |
| 0 | 0 | 0 | 0 | 0 | 0 | 0 | 0 |
| 0 | 0 | 0 | 0 | 0 | 0 | 0 | 0 |
| 0 | 0 | 2 | 0 | 0 | 0 | 1 | 0 |
| 0 | 1 | 2 | 0 | 0 | 0 | 4 | 0 |
| 1 | 1 | 0 | 0 | 0 | 0 | 0 | 0 |
| 0 | 2 | 0 | 0 | 0 | 0 | 1 | 0 |
| 3 | 1 | 1 | 0 | 0 | 0 | 0 | 0 |

|   |   |   |   |   |   |   |   |
|---|---|---|---|---|---|---|---|
| 0 | 0 | 2 | 0 | 0 | 0 | 3 | 0 |
| 0 | 2 | 1 | 0 | 0 | 0 | 1 | 0 |
| 0 | 0 | 0 | 0 | 0 | 0 | 0 | 1 |
| 0 | 1 | 0 | 0 | 0 | 0 | 0 | 0 |
| 0 | 1 | 1 | 0 | 0 | 0 | 1 | 0 |
| 0 | 0 | 0 | 0 | 0 | 0 | 2 | 0 |
| 0 | 1 | 3 | 0 | 0 | 0 | 0 | 1 |
| 0 | 0 | 0 | 0 | 0 | 0 | 0 | 0 |
| 0 | 2 | 0 | 0 | 1 | 0 | 0 | 0 |
| 0 | 2 | 1 | 0 | 0 | 0 | 0 | 0 |
| 1 | 1 | 4 | 0 | 1 | 0 | 2 | 0 |
| 0 | 1 | 0 | 0 | 0 | 0 | 1 | 0 |
| 0 | 0 | 2 | 0 | 0 | 0 | 0 | 1 |
| 0 | 2 | 0 | 0 | 0 | 0 | 0 | 0 |
| 0 | 3 | 0 | 0 | 1 | 0 | 0 | 0 |
| 0 | 1 | 1 | 0 | 0 | 0 | 0 | 0 |
| 0 | 4 | 3 | 0 | 0 | 0 | 1 | 0 |
| 0 | 1 | 0 | 0 | 0 | 0 | 4 | 0 |
| 0 | 0 | 0 | 0 | 0 | 0 | 1 | 0 |
| 0 | 0 | 0 | 0 | 1 | 0 | 0 | 0 |
| 1 | 0 | 0 | 0 | 0 | 0 | 0 | 0 |
| 1 | 0 | 0 | 0 | 0 | 0 | 0 | 0 |
| 0 | 0 | 0 | 0 | 0 | 0 | 1 | 0 |
| 0 | 0 | 0 | 0 | 0 | 0 | 0 | 0 |
| 0 | 0 | 1 | 0 | 0 | 0 | 7 | 0 |
| 0 | 0 | 1 | 0 | 0 | 0 | 2 | 0 |
| 1 | 0 | 0 | 0 | 0 | 0 | 1 | 0 |
| 1 | 0 | 0 | 0 | 0 | 0 | 1 | 0 |
| 0 | 0 | 0 | 0 | 1 | 0 | 0 | 0 |

|   |   |   |   |   |   |   |   |
|---|---|---|---|---|---|---|---|
| 0 | 0 | 0 | 0 | 0 | 0 | 0 | 0 |
| 0 | 0 | 0 | 0 | 0 | 0 | 0 | 0 |
| 2 | 0 | 0 | 0 | 0 | 0 | 0 | 0 |
| 0 | 0 | 0 | 0 | 0 | 0 | 0 | 0 |
| 1 | 0 | 0 | 0 | 0 | 0 | 0 | 0 |
| 1 | 0 | 0 | 0 | 1 | 0 | 0 | 0 |
| 0 | 0 | 0 | 0 | 0 | 0 | 1 | 0 |
| 1 | 0 | 0 | 0 | 0 | 0 | 0 | 0 |
| 0 | 0 | 0 | 0 | 0 | 0 | 0 | 0 |
| 0 | 0 | 0 | 0 | 2 | 0 | 0 | 0 |
| 0 | 0 | 0 | 0 | 0 | 0 | 0 | 0 |
| 0 | 0 | 0 | 0 | 0 | 0 | 0 | 0 |
| 1 | 0 | 0 | 0 | 0 | 0 | 1 | 0 |
| 1 | 0 | 0 | 0 | 1 | 0 | 0 | 1 |
| 0 | 1 | 0 | 0 | 0 | 0 | 0 | 0 |
| 0 | 0 | 0 | 0 | 1 | 0 | 0 | 0 |
| 1 | 0 | 3 | 0 | 0 | 0 | 3 | 0 |
| 0 | 0 | 1 | 0 | 0 | 0 | 0 | 0 |
| 0 | 0 | 0 | 0 | 0 | 0 | 0 | 0 |
| 0 | 0 | 0 | 0 | 0 | 0 | 1 | 0 |
| 0 | 0 | 0 | 0 | 0 | 0 | 0 | 0 |
| 1 | 0 | 0 | 0 | 0 | 0 | 0 | 0 |
| 0 | 0 | 0 | 0 | 0 | 0 | 0 | 1 |
| 0 | 0 | 0 | 0 | 0 | 0 | 0 | 0 |
| 0 | 0 | 0 | 0 | 1 | 0 | 1 | 0 |
| 1 | 0 | 0 | 0 | 0 | 0 | 0 | 0 |
| 0 | 0 | 0 | 0 | 0 | 0 | 0 | 0 |
| 0 | 0 | 0 | 0 | 0 | 0 | 1 | 0 |
| 0 | 0 | 0 | 0 | 0 | 0 | 0 | 0 |

|   |   |   |   |   |   |   |   |
|---|---|---|---|---|---|---|---|
| 0 | 0 | 0 | 0 | 0 | 0 | 0 | 0 |
| 0 | 0 | 1 | 0 | 0 | 0 | 0 | 0 |
| 0 | 0 | 0 | 0 | 0 | 0 | 0 | 0 |
| 0 | 1 | 1 | 0 | 0 | 0 | 2 | 0 |
| 0 | 0 | 0 | 0 | 0 | 0 | 2 | 0 |
| 0 | 1 | 0 | 0 | 2 | 0 | 0 | 0 |
| 0 | 0 | 0 | 0 | 0 | 0 | 0 | 0 |
| 0 | 1 | 0 | 0 | 2 | 0 | 1 | 0 |
| 0 | 0 | 0 | 0 | 1 | 0 | 0 | 0 |
| 0 | 1 | 1 | 0 | 2 | 0 | 1 | 0 |
| 0 | 1 | 0 | 0 | 0 | 0 | 1 | 0 |
| 0 | 0 | 0 | 0 | 0 | 0 | 0 | 0 |
| 0 | 0 | 0 | 0 | 0 | 0 | 0 | 0 |
| 0 | 1 | 2 | 0 | 0 | 0 | 0 | 0 |
| 0 | 0 | 3 | 0 | 0 | 0 | 0 | 0 |
| 0 | 0 | 2 | 0 | 0 | 0 | 1 | 0 |
| 0 | 0 | 1 | 0 | 1 | 0 | 1 | 0 |
| 0 | 1 | 1 | 0 | 0 | 0 | 0 | 0 |
| 0 | 1 | 0 | 0 | 1 | 0 | 0 | 0 |
| 0 | 1 | 1 | 0 | 0 | 0 | 1 | 0 |
| 0 | 0 | 1 | 0 | 0 | 0 | 1 | 0 |
| 0 | 0 | 0 | 0 | 0 | 0 | 0 | 0 |
| 0 | 0 | 0 | 0 | 0 | 0 | 1 | 0 |
| 0 | 0 | 2 | 0 | 1 | 0 | 0 | 0 |
| 0 | 0 | 0 | 0 | 0 | 0 | 0 | 0 |
| 0 | 0 | 4 | 0 | 0 | 0 | 0 | 0 |
| 0 | 0 | 1 | 0 | 0 | 0 | 0 | 0 |
| 0 | 0 | 0 | 0 | 0 | 0 | 1 | 0 |
| 0 | 0 | 0 | 0 | 0 | 0 | 0 | 0 |





|   |   |   |   |   |   |   |   |
|---|---|---|---|---|---|---|---|
| 0 | 0 | 0 | 0 | 0 | 0 | 0 | 0 |
| 0 | 0 | 1 | 0 | 0 | 0 | 0 | 0 |
| 0 | 0 | 0 | 0 | 0 | 0 | 0 | 0 |
| 0 | 0 | 0 | 0 | 0 | 0 | 0 | 0 |
| 0 | 0 | 0 | 0 | 0 | 0 | 0 | 0 |
| 0 | 0 | 0 | 0 | 0 | 0 | 0 | 0 |
| 0 | 0 | 0 | 0 | 0 | 0 | 0 | 0 |
| 0 | 0 | 0 | 0 | 0 | 0 | 0 | 0 |
| 0 | 0 | 0 | 0 | 0 | 0 | 0 | 0 |
| 0 | 0 | 0 | 0 | 0 | 0 | 0 | 0 |
| 0 | 0 | 0 | 0 | 0 | 0 | 0 | 0 |
| 0 | 0 | 0 | 0 | 0 | 0 | 0 | 0 |
| 0 | 0 | 0 | 0 | 0 | 0 | 0 | 0 |
| 0 | 0 | 0 | 0 | 0 | 0 | 0 | 0 |
| 0 | 0 | 0 | 0 | 0 | 0 | 0 | 0 |
| 0 | 0 | 0 | 0 | 0 | 0 | 0 | 0 |
| 0 | 0 | 0 | 0 | 0 | 0 | 0 | 0 |
| 0 | 0 | 0 | 0 | 0 | 0 | 0 | 0 |
| 0 | 0 | 0 | 0 | 0 | 0 | 0 | 0 |
| 0 | 0 | 1 | 0 | 0 | 0 | 0 | 0 |
| 0 | 0 | 0 | 1 | 0 | 0 | 0 | 0 |
| 0 | 0 | 0 | 0 | 0 | 0 | 0 | 0 |
| 0 | 1 | 0 | 0 | 0 | 0 | 0 | 0 |
| 0 | 0 | 0 | 0 | 0 | 0 | 0 | 0 |
| 0 | 0 | 3 | 0 | 0 | 0 | 0 | 0 |
| 0 | 0 | 0 | 0 | 0 | 0 | 0 | 0 |
| 0 | 0 | 1 | 0 | 0 | 0 | 0 | 0 |
| 0 | 0 | 2 | 0 | 0 | 0 | 0 | 0 |

|   |   |   |   |   |   |   |   |
|---|---|---|---|---|---|---|---|
| 0 | 0 | 0 | 0 | 1 | 0 | 0 | 0 |
| 0 | 0 | 0 | 0 | 0 | 0 | 0 | 0 |
| 0 | 0 | 0 | 0 | 0 | 0 | 0 | 0 |
| 0 | 0 | 0 | 0 | 0 | 0 | 1 | 0 |
| 0 | 0 | 0 | 0 | 0 | 0 | 0 | 0 |
| 0 | 0 | 0 | 0 | 0 | 0 | 0 | 0 |
| 0 | 0 | 0 | 0 | 0 | 0 | 0 | 0 |
| 0 | 0 | 0 | 0 | 0 | 0 | 0 | 0 |
| 0 | 0 | 0 | 0 | 0 | 0 | 0 | 0 |
| 0 | 0 | 1 | 0 | 0 | 0 | 0 | 0 |
| 0 | 0 | 0 | 0 | 0 | 0 | 0 | 0 |
| 0 | 0 | 0 | 0 | 0 | 0 | 0 | 0 |
| 0 | 0 | 0 | 0 | 0 | 0 | 0 | 0 |
| 0 | 0 | 0 | 0 | 0 | 0 | 0 | 0 |
| 0 | 0 | 0 | 0 | 0 | 0 | 0 | 0 |
| 0 | 0 | 0 | 0 | 0 | 0 | 0 | 1 |
| 0 | 0 | 0 | 0 | 0 | 1 | 0 | 0 |
| 1 | 0 | 1 | 0 | 0 | 0 | 0 | 0 |
| 0 | 0 | 0 | 0 | 0 | 1 | 0 | 0 |
| 0 | 0 | 1 | 0 | 0 | 0 | 1 | 0 |
| 0 | 0 | 0 | 0 | 0 | 0 | 0 | 0 |
| 0 | 0 | 0 | 0 | 0 | 0 | 0 | 0 |
| 0 | 0 | 0 | 0 | 0 | 0 | 0 | 0 |
| 0 | 0 | 0 | 0 | 2 | 0 | 0 | 0 |
| 0 | 0 | 1 | 0 | 1 | 0 | 0 | 0 |
| 0 | 1 | 1 | 0 | 0 | 0 | 0 | 0 |
| 0 | 1 | 1 | 0 | 1 | 0 | 0 | 0 |
| 0 | 0 | 0 | 0 | 1 | 0 | 0 | 1 |
| 0 | 1 | 0 | 0 | 0 | 0 | 1 | 0 |
| 0 | 2 | 4 | 0 | 1 | 0 | 0 | 0 |

|   |   |   |   |   |   |   |   |
|---|---|---|---|---|---|---|---|
| 0 | 2 | 1 | 0 | 1 | 0 | 1 | 0 |
| 0 | 1 | 1 | 0 | 0 | 0 | 0 | 0 |
| 0 | 0 | 0 | 0 | 1 | 0 | 1 | 0 |
| 1 | 1 | 1 | 0 | 4 | 0 | 0 | 0 |
| 0 | 0 | 0 | 0 | 0 | 0 | 0 | 0 |
| 0 | 0 | 0 | 0 | 0 | 0 | 1 | 0 |
| 0 | 2 | 1 | 0 | 2 | 0 | 0 | 0 |
| 0 | 0 | 1 | 0 | 0 | 0 | 0 | 0 |
| 0 | 0 | 3 | 0 | 0 | 0 | 0 | 0 |
| 0 | 5 | 1 | 0 | 0 | 0 | 0 | 0 |
| 0 | 1 | 2 | 0 | 0 | 0 | 0 | 0 |
| 0 | 0 | 0 | 0 | 1 | 0 | 0 | 0 |
| 0 | 1 | 1 | 0 | 0 | 0 | 0 | 0 |
| 0 | 2 | 2 | 0 | 0 | 0 | 0 | 0 |
| 0 | 0 | 1 | 0 | 1 | 0 | 0 | 0 |
| 0 | 0 | 2 | 0 | 1 | 0 | 1 | 0 |
| 0 | 1 | 4 | 0 | 3 | 0 | 0 | 0 |
| 0 | 0 | 8 | 0 | 2 | 0 | 1 | 0 |
| 0 | 0 | 2 | 0 | 1 | 0 | 0 | 0 |
| 0 | 0 | 1 | 0 | 1 | 0 | 0 | 0 |
| 0 | 2 | 0 | 0 | 0 | 0 | 2 | 0 |
| 0 | 1 | 1 | 0 | 2 | 0 | 1 | 0 |
| 1 | 1 | 0 | 0 | 0 | 0 | 0 | 0 |
| 0 | 0 | 1 | 0 | 0 | 0 | 0 | 1 |
| 0 | 0 | 0 | 0 | 0 | 0 | 0 | 0 |
| 2 | 0 | 0 | 0 | 0 | 0 | 0 | 0 |
| 0 | 1 | 5 | 0 | 1 | 1 | 0 | 0 |
| 0 | 0 | 0 | 0 | 0 | 0 | 0 | 0 |
| 0 | 0 | 0 | 0 | 0 | 0 | 0 | 0 |

|   |   |   |   |   |   |   |   |
|---|---|---|---|---|---|---|---|
| 0 | 0 | 0 | 0 | 0 | 0 | 1 | 0 |
| 0 | 0 | 0 | 0 | 0 | 0 | 0 | 0 |
| 0 | 0 | 1 | 0 | 0 | 0 | 1 | 0 |
| 0 | 0 | 0 | 0 | 0 | 0 | 1 | 0 |
| 2 | 0 | 0 | 0 | 0 | 0 | 0 | 0 |
| 0 | 0 | 0 | 0 | 1 | 0 | 0 | 0 |
| 2 | 0 | 0 | 0 | 0 | 0 | 0 | 0 |
| 0 | 0 | 0 | 0 | 0 | 0 | 0 | 0 |
| 1 | 0 | 1 | 0 | 1 | 0 | 0 | 0 |
| 0 | 0 | 0 | 0 | 1 | 0 | 0 | 0 |
| 1 | 0 | 0 | 0 | 0 | 0 | 0 | 0 |
| 0 | 0 | 0 | 0 | 1 | 0 | 0 | 0 |
| 1 | 0 | 0 | 0 | 1 | 0 | 0 | 0 |
| 1 | 0 | 0 | 0 | 0 | 0 | 0 | 0 |
| 1 | 0 | 0 | 0 | 0 | 0 | 0 | 0 |
| 0 | 0 | 0 | 0 | 1 | 0 | 0 | 0 |
| 0 | 0 | 0 | 0 | 0 | 0 | 1 | 0 |
| 0 | 0 | 0 | 0 | 0 | 0 | 0 | 0 |
| 1 | 0 | 0 | 0 | 0 | 0 | 1 | 0 |
| 2 | 0 | 0 | 0 | 0 | 0 | 0 | 0 |
| 0 | 0 | 0 | 0 | 0 | 0 | 0 | 0 |
| 0 | 0 | 0 | 0 | 0 | 0 | 0 | 0 |
| 1 | 0 | 0 | 0 | 0 | 0 | 0 | 0 |

|        |        |
|--------|--------|
| zealut | zoeasp |
| 0      | 1      |
| 0      | 0      |
| 0      | 0      |
| 0      | 0      |

|   |   |
|---|---|
| 0 | 0 |
| 0 | 0 |
| 0 | 0 |
| 0 | 0 |
| 1 | 0 |
| 0 | 0 |
| 0 | 0 |
| 0 | 0 |
| 0 | 0 |
| 0 | 0 |
| 0 | 0 |
| 0 | 0 |
| 0 | 0 |
| 0 | 0 |
| 0 | 0 |
| 0 | 0 |
| 0 | 0 |
| 1 | 0 |
| 0 | 0 |
| 0 | 0 |
| 0 | 0 |
| 0 | 0 |
| 0 | 0 |
| 0 | 0 |
| 0 | 0 |
| 0 | 0 |
| 0 | 0 |
| 2 | 0 |
| 0 | 0 |
| 0 | 0 |
| 0 | 0 |



|   |   |
|---|---|
| 0 | 0 |
| 0 | 0 |
| 0 | 1 |
| 0 | 1 |
| 0 | 0 |
| 0 | 0 |
| 0 | 0 |
| 0 | 0 |
| 0 | 0 |
| 0 | 0 |
| 0 | 0 |
| 0 | 0 |
| 0 | 0 |
| 0 | 0 |
| 0 | 0 |
| 1 | 0 |
| 0 | 0 |
| 0 | 0 |
| 0 | 0 |
| 1 | 0 |
| 0 | 0 |
| 0 | 0 |
| 3 | 1 |
| 2 | 0 |
| 0 | 0 |
| 0 | 0 |
| 0 | 1 |
| 0 | 0 |
| 0 | 0 |
| 0 | 0 |







|   |   |
|---|---|
| 0 | 0 |
| 0 | 0 |
| 0 | 0 |
| 0 | 0 |
| 1 | 0 |
| 0 | 0 |
| 0 | 1 |
| 1 | 0 |
| 0 | 0 |
| 1 | 0 |
| 0 | 1 |
| 2 | 0 |
| 0 | 0 |
| 0 | 0 |
| 0 | 0 |
| 0 | 0 |
| 1 | 0 |
| 0 | 0 |
| 0 | 0 |
| 0 | 0 |
| 0 | 0 |
| 0 | 0 |
| 0 | 0 |
| 0 | 0 |
| 0 | 0 |
| 0 | 0 |
| 1 | 0 |
| 0 | 0 |
| 0 | 0 |
| 0 | 0 |
| 0 | 0 |









|   |   |
|---|---|
| 0 | 0 |
| 0 | 0 |
| 0 | 0 |
| 0 | 0 |
| 0 | 0 |
| 0 | 0 |
| 0 | 0 |
| 0 | 0 |
| 0 | 0 |
| 0 | 0 |
| 0 | 0 |
| 0 | 0 |
| 0 | 1 |
| 0 | 0 |
| 0 | 0 |
| 0 | 0 |
| 0 | 0 |
| 0 | 0 |
| 0 | 0 |
| 0 | 0 |
| 0 | 0 |
| 0 | 0 |
| 0 | 0 |
| 0 | 0 |
| 0 | 0 |
| 0 | 1 |
| 0 | 0 |
| 0 | 0 |
| 0 | 0 |





|   |   |
|---|---|
| 1 | 0 |
| 1 | 0 |
| 0 | 0 |
| 0 | 0 |
| 0 | 0 |
| 0 | 0 |
| 0 | 0 |
| 0 | 0 |
| 0 | 0 |
| 1 | 0 |
| 0 | 0 |
| 1 | 0 |
| 0 | 0 |
| 0 | 0 |
| 0 | 0 |
| 0 | 0 |
| 0 | 0 |
| 1 | 0 |
| 0 | 0 |
| 0 | 0 |
| 0 | 0 |
| 0 | 0 |
| 1 | 0 |
| 0 | 0 |
| 0 | 0 |
| 0 | 0 |
| 0 | 0 |
